# Supplementary material for: Prediction of Substrate-Enzyme-Product Interaction Based on Molecular Descriptors and Physicochemical Properties
Source: Biomed Res Int. 2013 Dec 22;2013:674215. doi: 10.1155/2013/674215 (PMC3881445; doi:10.1155/2013/674215)
Supplement: Supplementary file 1 — Supplementary Material 1： The ID of 1326 compounds and 939 enzymes of metabolic pathway in Kegg database. Supplementary Material 2：14,592 networking triads of substrate-enzyme-product. Supplementary Material 3: 729,600 non-networking triads of substrate-enzyme-product. Supplementary Material 4: Calculated value of molecular descriptors of 1326 compounds and the categories. Supplementary Material 5: The value of 132 physicochemical descriptors for 939 enzyme. Supplementary Material 6: The MaxRel and mRMR feature tables using mRMR method. [file 674215.f1.zip]

Archive with 7 entries (6 files):
- 674215.f1/
- 674215.f1/supplemental material I.txt
- 674215.f1/supplemental material II.csv
- 674215.f1/supplemental material III.csv
- 674215.f1/supplemental material IV.csv
- 674215.f1/supplemental material V.txt
- 674215.f1/supplemental material VI.txt
