# Supplementary material for: Prediction of Substrate-Enzyme-Product Interaction Based on Molecular Descriptors and Physicochemical Properties
Source: Biomed Res Int. 2013 Dec 22;2013:674215. doi: 10.1155/2013/674215 (PMC3881445; doi:10.1155/2013/674215)
Supplement: Supplementary file 1 — Supplementary Material 1： The ID of 1326 compounds and 939 enzymes of metabolic pathway in Kegg database. Supplementary Material 2：14,592 networking triads of substrate-enzyme-product. Supplementary Material 3: 729,600 non-networking triads of substrate-enzyme-product. Supplementary Material 4: Calculated value of molecular descriptors of 1326 compounds and the categories. Supplementary Material 5: The value of 132 physicochemical descriptors for 939 enzyme. Supplementary Material 6: The MaxRel and mRMR feature tables using mRMR method. [file 674215.f1.zip › 674215.f1/supplemental material I.txt]

The ID of 1326 compounds  and 939 enzymes

Compound
C00002
C00003
C00005
C00008
C00010
C00015
C00016
C00018
C00019
C00020
C00021
C00022
C00024
C00025
C00026
C00029
C00031
C00032
C00033
C00035
C00036
C00037
C00041
C00042
C00043
C00044
C00047
C00048
C00049
C00051
C00052
C00053
C00055
C00058
C00061
C00062
C00063
C00064
C00065
C00067
C00068
C00072
C00073
C00074
C00075
C00077
C00078
C00079
C00081
C00082
C00083
C00084
C00085
C00086
C00089
C00090
C00091
C00092
C00093
C00095
C00096
C00097
C00099
C00100
C00101
C00103
C00104
C00105
C00106
C00108
C00109
C00110
C00111
C00112
C00114
C00116
C00117
C00118
C00119
C00120
C00122
C00123
C00124
C00129
C00130
C00131
C00132
C00133
C00134
C00135
C00136
C00137
C00141
C00143
C00144
C00147
C00148
C00153
C00154
C00155
C00156
C00158
C00159
C00166
C00167
C00169
C00170
C00178
C00180
C00181
C00183
C00187
C00188
C00189
C00191
C00197
C00199
C00203
C00204
C00206
C00207
C00208
C00212
C00216
C00219
C00221
C00223
C00224
C00230
C00231
C00232
C00234
C00235
C00236
C00239
C00242
C00245
C00247
C00248
C00250
C00251
C00253
C00254
C00255
C00256
C00257
C00258
C00259
C00262
C00263
C00266
C00267
C00275
C00279
C00280
C00286
C00294
C00295
C00299
C00307
C00310
C00311
C00312
C00314
C00315
C00319
C00322
C00323
C00327
C00328
C00329
C00330
C00331
C00332
C00333
C00334
C00337
C00341
C00345
C00346
C00352
C00353
C00356
C00357
C00361
C00363
C00364
C00365
C00371
C00376
C00378
C00385
C00387
C00388
C00390
C00406
C00407
C00412
C00415
C00418
C00424
C00430
C00437
C00440
C00441
C00445
C00447
C00448
C00449
C00458
C00460
C00463
C00468
C00470
C00472
C00477
C00479
C00483
C00487
C00490
C00491
C00492
C00493
C00499
C00506
C00510
C00511
C00512
C00517
C00519
C00522
C00525
C00526
C00527
C00530
C00534
C00535
C00542
C00544
C00546
C00559
C00565
C00568
C00571
C00577
C00582
C00583
C00586
C00590
C00593
C00596
C00601
C00606
C00617
C00619
C00620
C00624
C00628
C00630
C00631
C00632
C00633
C00637
C00642
C00645
C00650
C00652
C00665
C00668
C00671
C00672
C00673
C00689
C00725
C00738
C00740
C00748
C00750
C00751
C00780
C00794
C00804
C00805
C00811
C00818
C00828
C00829
C00831
C00836
C00842
C00857
C00860
C00864
C00870
C00877
C00899
C00900
C00909
C00921
C00931
C00944
C00951
C00954
C00956
C00979
C01005
C01013
C01020
C01024
C01031
C01035
C01037
C01051
C01054
C01063
C01077
C01079
C01081
C01092
C01096
C01097
C01100
C01101
C01107
C01115
C01118
C01149
C01157
C01159
C01161
C01165
C01171
C01172
C01180
C01185
C01189
C01192
C01197
C01217
C01220
C01227
C01228
C01230
C01243
C01245
C01250
C01267
C01268
C01269
C01284
C01300
C01302
C01344
C01384
C01412
C01416
C01454
C01467
C01468
C01494
C01499
C01504
C01516
C01582
C01595
C01598
C01606
C01613
C01694
C01724
C01767
C01788
C01825
C01832
C01902
C01920
C01943
C01944
C01983
C01984
C01987
C02029
C02059
C02083
C02090
C02124
C02139
C02166
C02170
C02199
C02222
C02225
C02235
C02280
C02331
C02336
C02370
C02375
C02378
C02400
C02411
C02442
C02463
C02469
C02470
C02504
C02505
C02512
C02513
C02576
C02593
C02631
C02632
C02633
C02666
C02700
C02718
C02727
C02759
C02765
C02798
C02814
C02835
C02909
C02933
C02946
C03012
C03035
C03056
C03063
C03087
C03090
C03203
C03240
C03242
C03313
C03373
C03453
C03569
C03582
C03598
C03657
C03680
C03838
C03925
C04002
C04044
C04051
C04079
C04115
C04144
C04146
C04181
C04188
C04272
C04281
C04294
C04330
C04332
C04376
C04390
C04435
C04441
C04453
C04454
C04468
C04500
C04525
C04537
C04554
C04556
C04573
C04575
C04582
C04623
C04644
C04652
C04666
C04677
C04706
C04738
C04742
C04751
C04760
C04805
C04840
C04874
C04895
C04896
C05011
C05108
C05125
C05158
C05200
C05239
C05263
C05267
C05270
C05274
C05290
C05301
C05335
C05345
C05382
C05413
C05414
C05421
C05427
C05432
C05433
C05444
C05515
C05576
C05577
C05578
C05581
C05600
C05608
C05634
C05688
C05689
C05691
C05692
C05698
C05699
C05766
C05773
C05787
C05802
C05803
C05809
C05811
C05812
C05813
C05814
C05827
C05852
C05859
C05946
C05951
C05952
C05966
C06044
C06054
C06055
C06056
C06098
C06099
C06102
C06104
C06123
C06202
C06314
C06315
C06329
C06335
C06397
C06427
C06523
C06536
C06554
C06561
C06575
C06578
C06580
C06581
C06599
C06600
C06604
C06630
C06633
C06637
C06640
C06649
C06670
C06674
C06677
C06711
C06712
C06714
C06719
C06727
C06731
C06749
C06754
C06756
C06790
C06801
C06868
C06899
C06990
C07083
C07090
C07092
C07093
C07094
C07096
C07097
C07100
C07111
C07113
C07114
C07208
C07212
C07446
C07447
C07481
C07490
C07495
C07535
C07643
C07645
C07649
C07727
C07732
C07733
C07836
C07838
C08060
C08276
C08526
C08537
C08539
C08540
C08604
C08639
C08725
C08814
C09694
C09811
C09812
C09822
C09844
C09848
C09880
C09884
C10700
C10858
C11036
C11088
C11130
C11383
C11384
C11422
C11428
C11432
C11508
C11907
C11923
C11938
C11939
C11942
C12095
C12138
C12213
C12214
C12383
C12413
C12621
C12986
C12987
C12988
C13624
C13629
C13631
C13637
C13747
C14039
C14082
C14089
C14090
C14098
C14099
C14116
C14147
C14148
C14149
C14556
C14781
C14810
C14813
C14825
C14826
C14852
C14899
C15586
C15606
C15650
C15700
C15769
C15785
C15786
C15787
C15789
C15790
C15791
C15792
C15793
C15794
C15797
C15798
C15799
C15800
C15801
C15802
C15870
C15874
C15882
C15892
C15898
C15986
C16144
C16153
C16156
C16204
C16262
C16267
C16281
C16309
C16391
C16416
C16440
C16462
C16488
C04628
C11472
C16489
C05993
C00446
C02965
C01260
C05921
C03175
C11555
C03287
C01134
C03492
C04352
C03082
C02739
C04133
C00354
C03785
C05378
C01102
C00575
C16238
C05686
C01346
C00705
C00459
C01345
C00588
C01120
C06124
C01143
C04807
C00627
C00647
C04752
C03028
C04327
C00004
C00006
C00455
C05338
C05668
C06671
C07118
C09823
C14143
C16268
C16464
C03561
C15547
C00882
C00531
C03069
C05337
C16470
C02050
C02249
C03595
C16162
C01170
C01352
C01152
C01575
C04831
C05302
C05804
C06199
C09581
C10462
C11911
C15877
C15881
C15883
C15886
C15888
C15900
C05198
C05778
C15527
C04692
C08830
C04425
C01137
C00399
C05313
C00301
C03794
C00655
C00054
C06006
C06010
C02218
C03981
C00555
C06203
C03979
C04442
C05601
C06201
C00885
C06762
C02291
C00149
C00186
C02571
C03341
C05135
C06715
C06548
C01251
C02232
C03344
C05259
C05265
C05269
C05672
C12989
C04916
C06462
C03912
C00669
C05947
C05711
C05379
C05539
C05548
C16155
C02630
C01179
C00222
C00233
C05381
C00302
C00957
C05527
C05528
C03232
C06046
C08544
C12640
C15969
C16303
C16306
C16312
C16406
C16443
C16448
C01246
C01083
C15672
C02191
C06244
C05700
C06210
C05598
C01259
C05519
C03227
C05701
C04479
C01289
C04501
C01304
C00942
C07088
C00603
C04823
C00152
C00826
C00438
C03406
C05730
C00127
C03451
C01419
C04121
C00570
C00475
C04734
C11519
C05297
C04484
C01847
C04640
C11355
C06504
C02934
C00966
C04377
C06174
C13378
C01041
C04489
C00409
C04691
C04322
C02937
C03506
C16075
C12647
C08650
C00469
C01010
C00292
C06813
C04006
C01236
C00670
C01233
C03267
C01094
C04615
C00636
C05860
C03862
C05665
C00163
C00894
C00504
C01103
C01168
C00380
C16235
C04302
C06032
C00621
C00381
C00184
C00576
C05401
C00623
C03189
C00121
C01909
C14115
C01697
C04217
C11356
C12448
C01929
C01177
C03546
C04039
C03150
C05272
C00249
C13425
C02734
C00417
C02376
C09815
C00379
C03219
C05418
C15992
C03557
C15556
C13952
C00360
C14749
C14768
C14769
C14770
C14771
C14778
C14812
C14820
C14823
C12096
C02637
C05844
C01507
C00579
C05841
C00532
C05512
C05296
C00674
C01508
C00986
C02220
C05662
C03752
C15930
C06075
C11393
C00362
C11916
C03319
C00473
C01762
C10443
C01530
C05659
C03479
C09621
C09629
C09665
C09666
C09672
C09684
C09699
C09704
C09723
C16286
C03428
C06111
C04076
C12312
C05298
C05300
C02273
C02372
C07103
C16499
C03758
C01962
C05402
C01551
C02350
C00712
C01659
C02247
C07394
C15605
C00881
C06603
C05291
C05294
C03917
C05235
C05999
C01104
C06369
C12205
C05123
C06582
C07086
C04037
C02940
C03460
C05831
C05640
C04409
C13632
C03765
C04257
C04353
C06316
C06007
C01801
C02532
C05985
C14097
C05627
C03672
C02670
C05818
C14786
C14787
C02097
C06017
C03360
C02110
C02165
C05141
C02693
C05824
C01059
C14180
C03078
C03263
C09813
C02888
C06377
C03291
C01181
C06189
C04043
C03735
C03722
C05111
C04036
C06224
C05139
C04494
C01272
C01596
C06142
C06729
C03351
C05619
C16461
C02274
C07720
C11785
C05643
C05642
C03057
C05404
C05440
C11455
C11398
C04297
C15926
C03221
C16465
C05276
C02137
C03824
C13309
C03170
C02880
C06002
C08620
C16315
C04089
C04431
C12838
C16476
C16477
C04225
C15925
C11062
C06648
C14450
C06593
C03058
C05830
C05670
C16496
C11924
C05273
C04411
C16500
C12204
C05653
C06195
C08300
C05130
C03918
C05936
C11713
C16201
C16202
C06204
C06426
C11427
C06635
C05849
C03589
C07729
C05901
C05565
C16246
C11457
C04324
C04216
C04732
C11944
C08825
C05437
C05445
C05411
C05412
C05447
C06022
C04824
C05460
C05356
C11509
C05925
C07108
C05839
C05516
C05271
C05275
C05430
C15857
C15867
C08590
C05580
C05604
C05582
C10945
C05635
C05695
C05768
C05791
C05810
C05815
C05828
C06057
C07271
C06105
C14815
C16300
C10138
C06538
C09243
C06576
C06579
C07101
C07102
C06606
C06638
C06641
C06650
C06675
C06678
C06730
C07715
C06723
C09821
C16272
C07215
C07888
C06755
C06757
C11148
C14866
C12371
C07496
C11150
C12837
C07084
C07091
C07095
C07098
C07112
C11348
C07216
C07213
C07585
C14849
C14850
C14851
C07644
C07646
C12673
C07728
C07734
C08061
C12173
C08552
C16298
C12137
C16504
C11941
C13638
C12449
C14839
C14840
C14870
C11412
C11429
C11433
C15776
C11908
C12384
C12406
C11940
C11943
C12215
C12414
C12623
C13634
C13633
C16356
C16358
C14857
C14858
C14859
C14091
C14101
C14117
C14150
C14854
C14782
C14811
C14814
C14828
C14829
C14853
C16186
C15587
C15651
C15767
C15770
C15803
C16251
C15987
C16145
C16157
C16209
C16263
C16283
C16311
C16392
C16393
C16417


Enzyme
Q0080
Q0085
Q0130
YAL026C
YAL038W
YAL054C
YAR015W
YAR018C
YAR019C
YBL013W
YBL016W
YBL039C
YBL068W
YBL076C
YBL080C
YBL099W
YBL105C
YBR018C
YBR020W
YBR029C
YBR039W
YBR080C
YBR082C
YBR084W
YBR097W
YBR121C
YBR127C
YBR160W
YBR176W
YBR208C
YBR218C
YBR263W
YBR274W
YBR278W
YBR295W
YCL040W
YCL050C
YCR012W
YCR014C
YCR024C
YCR036W
YCR066W
YCR073C
YDL004W
YDL017W
YDL028C
YDL045C
YDL055C
YDL064W
YDL074C
YDL079C
YDL100C
YDL101C
YDL102W
YDL103C
YDL108W
YDL140C
YDL141W
YDL150W
YDL159W
YDL164C
YDL185W
YDL190C
YDR009W
YDR019C
YDR023W
YDR037W
YDR039C
YDR045C
YDR054C
YDR059C
YDR092W
YDR093W
YDR121W
YDR127W
YDR147W
YDR156W
YDR173C
YDR177W
YDR196C
YDR208W
YDR226W
YDR236C
YDR248C
YDR268W
YDR270W
YDR283C
YDR298C
YDR300C
YDR341C
YDR376W
YDR377W
YDR390C
YDR408C
YDR419W
YDR454C
YDR457W
YDR477W
YDR502C
YDR523C
YDR530C
YDR531W
YEL012W
YEL027W
YEL051W
YEL055C
YER005W
YER015W
YER052C
YER055C
YER068W
YER069W
YER087W
YER099C
YER100W
YER125W
YER129W
YER166W
YER168C
YER170W
YER183C
YFL022C
YFL029C
YFL033C
YFL036W
YFL053W
YFR014C
YFR019W
YFR053C
YGL006W
YGL008C
YGL058W
YGL062W
YGL130W
YGL141W
YGL167C
YGL180W
YGL234W
YGL245W
YGL253W
YGR007W
YGR010W
YGR020C
YGR040W
YGR061C
YGR094W
YGR124W
YGR133W
YGR171C
YGR184C
YGR185C
YGR188C
YGR194C
YGR202C
YGR204W
YGR240C
YGR244C
YGR262C
YGR264C
YHL007C
YHL010C
YHL011C
YHL012W
YHL032C
YHR011W
YHR019C
YHR020W
YHR025W
YHR026W
YHR030C
YHR074W
YHR079C
YHR091C
YIL009W
YIL030C
YIL035C
YIL048W
YIL078W
YIL107C
YIL139C
YIL145C
YJL005W
YJL046W
YJL087C
YJL095W
YJL101C
YJL106W
YJL128C
YJL130C
YJL148W
YJL155C
YJL164C
YJL187C
YJR010W
YJR036C
YJR057W
YJR063W
YJR103W
YJR105W
YJR109C
YJR121W
YKL001C
YKL010C
YKL016C
YKL024C
YKL035W
YKL067W
YKL080W
YKL126W
YKL132C
YKL139W
YKL144C
YKL161C
YKL166C
YKL181W
YKL194C
YKL210W
YKR002W
YKR097W
YLL018C
YLL019C
YLL036C
YLR028C
YLR058C
YLR060W
YLR113W
YLR133W
YLR153C
YLR180W
YLR240W
YLR260W
YLR295C
YLR305C
YLR306W
YLR318W
YLR328W
YLR382C
YLR447C
YML068W
YML070W
YMR001C
YMR013C
YMR022W
YMR054W
YMR104C
YMR113W
YMR120C
YMR139W
YMR162C
YMR205C
YMR208W
YMR216C
YMR217W
YMR220W
YMR246W
YMR293C
YNL073W
YNL102W
YNL113W
YNL151C
YNL154C
YNL207W
YNL220W
YNL247W
YNL248C
YNL256W
YNL262W
YNL267W
YNR003C
YNR012W
YNR016C
YNR027W
YNR031C
YNR043W
YNR057C
YOL013C
YOL016C
YOL033W
YOL049W
YOL055C
YOL058W
YOL061W
YOL097C
YOL102C
YOL115W
YOL136C
YOR005C
YOR061W
YOR116C
YOR119C
YOR142W
YOR143C
YOR151C
YOR168W
YOR171C
YOR207C
YOR231W
YOR241W
YOR270C
YOR303W
YOR317W
YOR330C
YOR332W
YOR335C
YOR339C
YOR340C
YOR341W
YOR347C
YOR351C
YPL031C
YPL036W
YPL040C
YPL078C
YPL097W
YPL104W
YPL160W
YPL167C
YPL203W
YPL204W
YPL209C
YPL214C
YPL234C
YPL236C
YPL258C
YPL271W
YPR010C
YPR020W
YPR033C
YPR035W
YPR036W
YPR047W
YPR054W
YPR066W
YPR081C
YPR110C
YPR145W
YPR161C
YPR175W
YPR180W
YPR190C
YHR039C-A
YML081C-A
Q0045
Q0065
Q0070
Q0105
Q0110
Q0115
Q0120
Q0250
Q0275
YAL062W
YAR071W
YBL045C
YBL056W
YBL064C
YBL098W
YBR006W
YBR026C
YBR035C
YBR046C
YBR092C
YBR093C
YBR115C
YBR125C
YBR145W
YBR149W
YBR153W
YBR166C
YBR213W
YBR221C
YBR244W
YBR265W
YBR276C
YCL018W
YCL030C
YDL006W
YDL022W
YDL024C
YDL047W
YDL066W
YDL067C
YDL078C
YDL085W
YDL134C
YDL168W
YDL171C
YDL174C
YDL188C
YDL215C
YDL230W
YDL236W
YDL246C
YDR044W
YDR074W
YDR075W
YDR148C
YDR158W
YDR178W
YDR256C
YDR287W
YDR347W
YDR353W
YDR402C
YDR436W
YDR453C
YDR481C
YDR529C
YEL024W
YEL038W
YER014W
YER023W
YER042W
YER062C
YER070W
YER073W
YER075C
YER081W
YER089C
YER133W
YER178W
YFL018C
YFR025C
YFR028C
YFR030W
YFR033C
YGL001C
YGL012W
YGL055W
YGL125W
YGL154C
YGL187C
YGL191W
YGL205W
YGL256W
YGR060W
YGR088W
YGR123C
YGR175C
YGR180C
YGR183C
YGR192C
YGR208W
YGR234W
YGR256W
YHR007C
YHR008C
YHR037W
YHR042W
YHR043C
YHR044C
YHR046C
YHR051W
YHR063C
YHR068W
YHR104W
YHR106W
YHR179W
YHR183W
YHR215W
YHR216W
YIL010W
YIL043C
YIL049W
YIL053W
YIL066C
YIL074C
YIL094C
YIL111W
YIL113W
YIL124W
YIL125W
YIL155C
YIR026C
YIR034C
YIR037W
YJL026W
YJL045W
YJL052W
YJL166W
YJR009C
YJR025C
YJR070C
YJR078W
YJR101W
YJR104C
YJR139C
YJR159W
YKL026C
YKL029C
YKL085W
YKL086W
YKL141W
YKL148C
YKL150W
YKL182W
YKL192C
YKL216W
YKR066C
YKR080W
YLL041C
YLL051C
YLR038C
YLR070C
YLR100W
YLR109W
YLR142W
YLR164W
YLR174W
YLR355C
YLR377C
YLR395C
YLR432W
YLR433C
YLR450W
YML016C
YML028W
YML054C
YML056C
YML057W
YML075C
YML086C
YML120C
YMR009W
YMR036C
YMR083W
YMR118C
YMR145C
YMR156C
YMR169C
YMR170C
YMR180C
YMR189W
YMR256C
YMR277W
YMR303C
YNL009W
YNL037C
YNL052W
YNL053W
YNL071W
YNL106C
YNL202W
YNL241C
YNL280C
YNR032W
YNR050C
YOL059W
YOL064C
YOL065C
YOL086C
YOL126C
YOL152W
YOR065W
YOR109W
YOR136W
YOR208W
YOR236W
YOR323C
YOR356W
YOR374W
YOR375C
YOR381W
YOR384W
YOR388C
YPL017C
YPL061W
YPL091W
YPL171C
YPL179W
YPL228W
YPL231W
YPR073C
YPR127W
YPR167C
YPR191W
YHR001W-A
YDR234W
YGL009C
YGL026C
YGL040C
YGL063W
YGR155W
YGR254W
YHR174W
YHR190W
YJL200C
YJR016C
YJR024C
YLR304C
YMR323W
YNL316C
YOR202W
YOR278W
YOR393W
YPL262W
YPR002W
YAR035W
YBL015W
YBL052C
YBL067C
YBR058C
YCR005C
YCR048W
YDL040C
YDL052C
YDL122W
YDL131W
YDL182W
YDR062W
YDR069C
YDR232W
YDR272W
YER061C
YER065C
YER090W
YER098W
YER144C
YER151C
YFL017C
YFR010W
YGL017W
YGR147C
YGR177C
YGR252W
YHL003C
YIL156W
YIL160C
YIR031C
YJL197W
YJR019C
YKL008C
YKL211C
YKR098C
YLR195C
YLR239C
YLR299W
YML042W
YML126C
YMR062C
YMR127C
YMR223W
YMR296C
YMR304W
YNL104C
YNL117W
YNL186W
YNL277W
YNR001C
YNR008W
YNR019W
YOR040W
YOR124C
YOR244W
YOR377W
YPL001W
YPL028W
YPL072W
YPL086C
YPR001W
YPR006C
YAL023C
YBL082C
YBR001C
YBR023C
YBR038W
YBR070C
YBR110W
YBR126C
YBR229C
YBR299W
YDL037C
YDL093W
YDL095W
YDR001C
YDR261C
YDR307W
YEL011W
YFR015C
YGL022W
YGL027C
YGL038C
YGL047W
YGL065C
YGL156W
YGR032W
YGR199W
YGR282C
YGR287C
YGR292W
YIL099W
YIL162W
YIL172C
YIR019C
YJL216C
YJL221C
YJR131W
YJR143C
YJR153W
YKL046C
YLR189C
YLR258W
YLR286C
YLR300W
YLR342W
YML100W
YMR238W
YMR261C
YMR306W
YNL192W
YNR030W
YOL157C
YOR190W
YOR321W
YPL175W
YPL227C
YPR026W
YPR160W
YPR183W
YPR184W
YBR133C
YBR236C
YDL033C
YDL200C
YDL201W
YDR120C
YDR410C
YDR440W
YER091C
YGR157W
YGR286C
YHR119W
YJL125C
YJL168C
YJR073C
YKR069W
YLR172C
YML008C
YNR058W
YOL052C
YOL096C
YOR074C
YOR196C
YBR111C
YDR441C
YGL248W
YLR359W
YML022W
YML035C
YOR360C
YER043C
YAL012W
YCL009C
YCL064C
YDL080C
YDR047W
YDR111C
YDR294C
YEL021W
YEL046C
YER086W
YFR055W
YGL184C
YGL202W
YGR019W
YGR087C
YGR170W
YHR137W
YHR208W
YIL116W
YJR148W
YKL060C
YKL104C
YKL106W
YKL184W
YLR027C
YLR044C
YLR089C
YLR134W
YLR438W
YMR108W
YMR250W
YNL169C
YNR033W
YOL140W
YOR128C
YOR184W
YDR354W
YFR047C
YHR128W
YLR017W
YLR209C
YML106W
YMR271C
YMR300C
YOR209C
YBR019C
YBR003W
YBR249C
YBR256C
YDL090C
YDL205C
YDR035W
YGL155W
YGR012W
YJL031C
YJL167W
YJR130C
YKL019W
YLR146C
YLR303W
YML082W
YOR176W
YOR274W
YPL069C
YPR069C
YPR176C
YDR242W
YDR321W
YGL037C
YGL194C
YLR155C
YLR157C
YLR158C
YLR160C
YLR231C
YLR307W
YLR308W
YMR281W
YNL021W
YNL330C
YPL096W
YPL116W
YPR068C
YBR118W
YBR243C
YCL004W
YDR385W
YEL042W
YER026C
YHR123W
YIL147C
YJL102W
YKR084C
YLL001W
YLR069C
YNL130C
YNL163C
YOR133W
YOR187W
YPR080W
YPR113W
YCL017C
YBL033C
YGR267C
YIR032C
YML004C
YBR117C
YGR043C
YJL088W
YLR354C
YOR251C
YPR074C
YDR487C
YHR018C
YPL111W
YBR196C
YER003C
YIR029W
YDL238C
YHR144C
YIR027C
YJL153C
YKL127W
YLR245C
YLR420W
YMR105C
YMR278W
YNL141W
YPR062W
YPL206C
YBR011C
YBR252W
YDR452W
YGR036C
YHR201C
YMR267W
YDR050C
YOR095C
YOR386W
YPL117C
YBL057C
YDL086W
YDR058C
YGR248W
YHR163W
YHR189W
YMR006C
YMR008C
YNR034W
YOL011W
YCR073W-A
YCR053W
YDL021W
YKL152C
YJL121C
YGL148W
YPR060C
YFL045C
YDR007W
YIL020C
YPR118W
YEL058W
YHR072W
YNL292W
YPL212C
YNL045W
YCL043C
YCR069W
YDR155C
YDR304C
YDR518W
YDR519W
YHR057C
YIL005W
YJR017C
YJR032W
YLR216C
YLR234W
YLR449W
YML074C
YML078W
YNL088W
YNL135C
YNR028W
YOL006C
YOR288C
YPL064C
YPL152W
