# Supplementary material for: Prediction of Substrate-Enzyme-Product Interaction Based on Molecular Descriptors and Physicochemical Properties
Source: Biomed Res Int. 2013 Dec 22;2013:674215. doi: 10.1155/2013/674215 (PMC3881445; doi:10.1155/2013/674215)
Supplement: Supplementary file 1 — Supplementary Material 1： The ID of 1326 compounds and 939 enzymes of metabolic pathway in Kegg database. Supplementary Material 2：14,592 networking triads of substrate-enzyme-product. Supplementary Material 3: 729,600 non-networking triads of substrate-enzyme-product. Supplementary Material 4: Calculated value of molecular descriptors of 1326 compounds and the categories. Supplementary Material 5: The value of 132 physicochemical descriptors for 939 enzyme. Supplementary Material 6: The MaxRel and mRMR feature tables using mRMR method. [file 674215.f1.zip › 674215.f1/supplemental material II.csv]

14	592 networking triads of substrate-enzyme-product
Substrate	Enzyme	Product
C00002	Q0080	C00008
C00002	Q0085	C00008
C00002	Q0130	C00008
C00002	YAL026C	C00008
C00002	YAL038W	C00008
C00002	YAL038W	C00074
C00002	YAL038W	C00631
C00002	YAL038W	C01185
C00002	YAL038W	C04628
C00002	YAL038W	C11472
C00002	YAL038W	C16489
C00002	YAL054C	C00008
C00002	YAL054C	C00020
C00002	YAL054C	C05993
C00002	YAR015W	C00008
C00002	YAR018C	C00008
C00002	YAR019C	C00008
C00002	YBL013W	C00008
C00002	YBL016W	C00008
C00002	YBL039C	C00008
C00002	YBL068W	C00020
C00002	YBL068W	C00119
C00002	YBL076C	C00020
C00002	YBL080C	C00008
C00002	YBL099W	C00008
C00002	YBL105C	C00008
C00002	YBR018C	C06397
C00002	YBR020W	C00008
C00002	YBR020W	C00446
C00002	YBR020W	C00631
C00002	YBR020W	C01185
C00002	YBR020W	C04628
C00002	YBR020W	C11472
C00002	YBR020W	C16489
C00002	YBR029C	C06397
C00002	YBR039W	C00008
C00002	YBR080C	C00008
C00002	YBR082C	C00020
C00002	YBR084W	C00008
C00002	YBR097W	C00008
C00002	YBR121C	C00020
C00002	YBR127C	C00008
C00002	YBR160W	C00008
C00002	YBR176W	C00008
C00002	YBR208C	C00008
C00002	YBR218C	C00008
C00002	YBR263W	C00008
C00002	YBR274W	C00008
C00002	YBR278W	C06397
C00002	YBR295W	C00008
C00002	YCL040W	C00008
C00002	YCL040W	C00085
C00002	YCL040W	C00092
C00002	YCL040W	C00275
C00002	YCL040W	C00352
C00002	YCL040W	C00631
C00002	YCL040W	C00668
C00002	YCL040W	C01096
C00002	YCL040W	C01172
C00002	YCL040W	C01185
C00002	YCL040W	C02965
C00002	YCL040W	C04628
C00002	YCL040W	C05345
C00002	YCL040W	C11472
C00002	YCL040W	C16489
C00002	YCL050C	C01260
C00002	YCL050C	C06397
C00002	YCR012W	C00008
C00002	YCR012W	C00236
C00002	YCR012W	C01159
C00002	YCR012W	C12987
C00002	YCR014C	C06397
C00002	YCR024C	C00020
C00002	YCR036W	C00008
C00002	YCR036W	C00117
C00002	YCR036W	C00631
C00002	YCR036W	C00673
C00002	YCR036W	C01185
C00002	YCR036W	C04628
C00002	YCR036W	C11472
C00002	YCR036W	C16489
C00002	YCR066W	C00020
C00002	YCR073C	C00008
C00002	YDL004W	C00008
C00002	YDL017W	C00008
C00002	YDL028C	C00008
C00002	YDL045C	C00016
C00002	YDL045C	C06397
C00002	YDL055C	C06397
C00002	YDL064W	C00020
C00002	YDL074C	C00020
C00002	YDL079C	C00008
C00002	YDL100C	C00008
C00002	YDL101C	C00008
C00002	YDL102W	C06397
C00002	YDL103C	C06397
C00002	YDL108W	C00008
C00002	YDL140C	C06397
C00002	YDL141W	C00008
C00002	YDL141W	C00020
C00002	YDL141W	C05921
C00002	YDL150W	C06397
C00002	YDL159W	C00008
C00002	YDL164C	C00020
C00002	YDL185W	C00008
C00002	YDL190C	C00020
C00002	YDR009W	C00008
C00002	YDR009W	C00446
C00002	YDR009W	C00631
C00002	YDR009W	C01185
C00002	YDR009W	C04628
C00002	YDR009W	C11472
C00002	YDR009W	C16489
C00002	YDR019C	C00008
C00002	YDR023W	C00020
C00002	YDR037W	C00020
C00002	YDR039C	C00008
C00002	YDR045C	C06397
C00002	YDR054C	C00020
C00002	YDR059C	C00020
C00002	YDR092W	C00020
C00002	YDR093W	C00008
C00002	YDR121W	C06397
C00002	YDR127W	C00008
C00002	YDR127W	C00631
C00002	YDR127W	C01185
C00002	YDR127W	C03175
C00002	YDR127W	C04628
C00002	YDR127W	C11472
C00002	YDR127W	C16489
C00002	YDR147W	C00008
C00002	YDR147W	C00346
C00002	YDR147W	C00631
C00002	YDR147W	C01185
C00002	YDR147W	C04628
C00002	YDR147W	C11472
C00002	YDR147W	C16489
C00002	YDR156W	C06397
C00002	YDR173C	C00008
C00002	YDR173C	C00631
C00002	YDR173C	C01185
C00002	YDR173C	C01284
C00002	YDR173C	C04628
C00002	YDR173C	C11472
C00002	YDR173C	C11555
C00002	YDR173C	C16489
C00002	YDR177W	C00020
C00002	YDR196C	C00008
C00002	YDR196C	C00010
C00002	YDR196C	C00631
C00002	YDR196C	C01185
C00002	YDR196C	C04628
C00002	YDR196C	C11472
C00002	YDR196C	C16489
C00002	YDR208W	C00008
C00002	YDR208W	C00631
C00002	YDR208W	C01185
C00002	YDR208W	C04628
C00002	YDR208W	C11472
C00002	YDR208W	C16489
C00002	YDR226W	C00008
C00002	YDR226W	C00206
C00002	YDR236C	C00008
C00002	YDR236C	C00061
C00002	YDR236C	C00631
C00002	YDR236C	C01185
C00002	YDR236C	C04628
C00002	YDR236C	C11472
C00002	YDR236C	C16489
C00002	YDR248C	C00008
C00002	YDR248C	C00345
C00002	YDR248C	C00631
C00002	YDR248C	C01185
C00002	YDR248C	C04628
C00002	YDR248C	C11472
C00002	YDR248C	C16489
C00002	YDR268W	C00020
C00002	YDR270W	C00008
C00002	YDR283C	C00008
C00002	YDR298C	C00008
C00002	YDR300C	C00008
C00002	YDR300C	C01159
C00002	YDR300C	C03287
C00002	YDR300C	C12987
C00002	YDR341C	C00020
C00002	YDR376W	C00008
C00002	YDR377W	C00008
C00002	YDR390C	C00020
C00002	YDR408C	C00008
C00002	YDR419W	C06397
C00002	YDR454C	C00008
C00002	YDR454C	C00035
C00002	YDR454C	C00361
C00002	YDR457W	C00020
C00002	YDR477W	C00008
C00002	YDR502C	C00019
C00002	YDR502C	C05691
C00002	YDR523C	C00008
C00002	YDR530C	C01260
C00002	YDR530C	C06397
C00002	YDR531W	C00008
C00002	YDR531W	C00631
C00002	YDR531W	C01134
C00002	YDR531W	C01185
C00002	YDR531W	C03492
C00002	YDR531W	C04352
C00002	YDR531W	C04628
C00002	YDR531W	C11472
C00002	YDR531W	C16489
C00002	YEL012W	C00020
C00002	YEL027W	C00008
C00002	YEL051W	C00008
C00002	YEL055C	C06397
C00002	YER005W	C00008
C00002	YER005W	C00020
C00002	YER015W	C00008
C00002	YER015W	C00020
C00002	YER052C	C00008
C00002	YER052C	C01159
C00002	YER052C	C03082
C00002	YER052C	C12987
C00002	YER055C	C02739
C00002	YER068W	C00020
C00002	YER069W	C00008
C00002	YER069W	C01159
C00002	YER069W	C04133
C00002	YER069W	C12987
C00002	YER087W	C00020
C00002	YER099C	C00020
C00002	YER099C	C00119
C00002	YER100W	C00020
C00002	YER125W	C00020
C00002	YER129W	C00008
C00002	YER166W	C00008
C00002	YER168C	C06397
C00002	YER170W	C00008
C00002	YER170W	C00206
C00002	YER183C	C00008
C00002	YFL022C	C00020
C00002	YFL029C	C00008
C00002	YFL033C	C00008
C00002	YFL036W	C06397
C00002	YFL053W	C00008
C00002	YFL053W	C00111
C00002	YFL053W	C00631
C00002	YFL053W	C01185
C00002	YFL053W	C04628
C00002	YFL053W	C11472
C00002	YFL053W	C16489
C00002	YFR014C	C00008
C00002	YFR019W	C00008
C00002	YFR019W	C00631
C00002	YFR019W	C01185
C00002	YFR019W	C04628
C00002	YFR019W	C11472
C00002	YFR019W	C16489
C00002	YFR053C	C00008
C00002	YFR053C	C00085
C00002	YFR053C	C00092
C00002	YFR053C	C00275
C00002	YFR053C	C00352
C00002	YFR053C	C00631
C00002	YFR053C	C00668
C00002	YFR053C	C01096
C00002	YFR053C	C01172
C00002	YFR053C	C01185
C00002	YFR053C	C02965
C00002	YFR053C	C04628
C00002	YFR053C	C05345
C00002	YFR053C	C11472
C00002	YFR053C	C16489
C00002	YGL006W	C00008
C00002	YGL008C	C00008
C00002	YGL058W	C00020
C00002	YGL062W	C00008
C00002	YGL130W	C06397
C00002	YGL141W	C00020
C00002	YGL167C	C00008
C00002	YGL180W	C00008
C00002	YGL234W	C00008
C00002	YGL245W	C00020
C00002	YGL253W	C00008
C00002	YGL253W	C00085
C00002	YGL253W	C00092
C00002	YGL253W	C00275
C00002	YGL253W	C00352
C00002	YGL253W	C00631
C00002	YGL253W	C00668
C00002	YGL253W	C01096
C00002	YGL253W	C01172
C00002	YGL253W	C01185
C00002	YGL253W	C02965
C00002	YGL253W	C04628
C00002	YGL253W	C05345
C00002	YGL253W	C11472
C00002	YGL253W	C16489
C00002	YGR007W	C06397
C00002	YGR010W	C00003
C00002	YGR010W	C00857
C00002	YGR010W	C06397
C00002	YGR020C	C00008
C00002	YGR040W	C00008
C00002	YGR061C	C00008
C00002	YGR094W	C00020
C00002	YGR124W	C00008
C00002	YGR124W	C00020
C00002	YGR133W	C00020
C00002	YGR171C	C00020
C00002	YGR184C	C00020
C00002	YGR185C	C00020
C00002	YGR188C	C00008
C00002	YGR194C	C00008
C00002	YGR194C	C00231
C00002	YGR194C	C00631
C00002	YGR194C	C01185
C00002	YGR194C	C04628
C00002	YGR194C	C11472
C00002	YGR194C	C16489
C00002	YGR202C	C06397
C00002	YGR204W	C00008
C00002	YGR240C	C00008
C00002	YGR240C	C00354
C00002	YGR240C	C00447
C00002	YGR240C	C00631
C00002	YGR240C	C01185
C00002	YGR240C	C03785
C00002	YGR240C	C04628
C00002	YGR240C	C05378
C00002	YGR240C	C11472
C00002	YGR240C	C16489
C00002	YGR244C	C00008
C00002	YGR244C	C00020
C00002	YGR262C	C00008
C00002	YGR264C	C00020
C00002	YHL007C	C00008
C00002	YHL010C	C00020
C00002	YHL011C	C00020
C00002	YHL011C	C00119
C00002	YHL012W	C06397
C00002	YHL032C	C00008
C00002	YHL032C	C00093
C00002	YHL032C	C00631
C00002	YHL032C	C01185
C00002	YHL032C	C04628
C00002	YHL032C	C11472
C00002	YHL032C	C16489
C00002	YHR011W	C00020
C00002	YHR019C	C00020
C00002	YHR020W	C00020
C00002	YHR025W	C00008
C00002	YHR025W	C00631
C00002	YHR025W	C01102
C00002	YHR025W	C01185
C00002	YHR025W	C04628
C00002	YHR025W	C11472
C00002	YHR025W	C16489
C00002	YHR026W	C00008
C00002	YHR030C	C00008
C00002	YHR074W	C00008
C00002	YHR074W	C00020
C00002	YHR079C	C00008
C00002	YHR091C	C00020
C00002	YIL009W	C00008
C00002	YIL009W	C00020
C00002	YIL030C	C00020
C00002	YIL035C	C00008
C00002	YIL048W	C00008
C00002	YIL078W	C00020
C00002	YIL107C	C00008
C00002	YIL107C	C00631
C00002	YIL107C	C00665
C00002	YIL107C	C01185
C00002	YIL107C	C04628
C00002	YIL107C	C11472
C00002	YIL107C	C16489
C00002	YIL139C	C06397
C00002	YIL145C	C00020
C00002	YJL005W	C00008
C00002	YJL005W	C00575
C00002	YJL046W	C06397
C00002	YJL046W	C16238
C00002	YJL087C	C00020
C00002	YJL095W	C00008
C00002	YJL101C	C00008
C00002	YJL106W	C00008
C00002	YJL128C	C00008
C00002	YJL130C	C00008
C00002	YJL130C	C00169
C00002	YJL148W	C06397
C00002	YJL155C	C00008
C00002	YJL155C	C00631
C00002	YJL155C	C00665
C00002	YJL155C	C01185
C00002	YJL155C	C04628
C00002	YJL155C	C11472
C00002	YJL155C	C16489
C00002	YJL164C	C00008
C00002	YJL187C	C00008
C00002	YJR010W	C00224
C00002	YJR010W	C05686
C00002	YJR010W	C06397
C00002	YJR036C	C00020
C00002	YJR057W	C00008
C00002	YJR057W	C00363
C00002	YJR057W	C01346
C00002	YJR063W	C06397
C00002	YJR103W	C00008
C00002	YJR105W	C00008
C00002	YJR105W	C00020
C00002	YJR105W	C00631
C00002	YJR105W	C01185
C00002	YJR105W	C04628
C00002	YJR105W	C11472
C00002	YJR105W	C16489
C00002	YJR109C	C00008
C00002	YJR109C	C00169
C00002	YJR121W	C00008
C00002	YKL001C	C00008
C00002	YKL001C	C00053
C00002	YKL001C	C00631
C00002	YKL001C	C01185
C00002	YKL001C	C04628
C00002	YKL001C	C11472
C00002	YKL001C	C16489
C00002	YKL010C	C00020
C00002	YKL016C	C00008
C00002	YKL024C	C00008
C00002	YKL024C	C00015
C00002	YKL024C	C00112
C00002	YKL024C	C00705
C00002	YKL035W	C06397
C00002	YKL067W	C00002
C00002	YKL067W	C00008
C00002	YKL067W	C00044
C00002	YKL067W	C00063
C00002	YKL067W	C00075
C00002	YKL067W	C00081
C00002	YKL067W	C00131
C00002	YKL067W	C00286
C00002	YKL067W	C00458
C00002	YKL067W	C00459
C00002	YKL067W	C00460
C00002	YKL067W	C01345
C00002	YKL080W	C00008
C00002	YKL126W	C00008
C00002	YKL132C	C00008
C00002	YKL139W	C00008
C00002	YKL144C	C06397
C00002	YKL161C	C00008
C00002	YKL166C	C00008
C00002	YKL181W	C00020
C00002	YKL181W	C00119
C00002	YKL194C	C00020
C00002	YKL210W	C00020
C00002	YKR002W	C06397
C00002	YKR097W	C00008
C00002	YKR097W	C00074
C00002	YLL018C	C00020
C00002	YLL019C	C00008
C00002	YLL036C	C00020
C00002	YLR028C	C00008
C00002	YLR058C	C00008
C00002	YLR060W	C00020
C00002	YLR113W	C00008
C00002	YLR133W	C00008
C00002	YLR133W	C00588
C00002	YLR133W	C00631
C00002	YLR133W	C01185
C00002	YLR133W	C04628
C00002	YLR133W	C11472
C00002	YLR133W	C16489
C00002	YLR153C	C00008
C00002	YLR153C	C00020
C00002	YLR153C	C05993
C00002	YLR180W	C00019
C00002	YLR180W	C05691
C00002	YLR240W	C00008
C00002	YLR240W	C00631
C00002	YLR240W	C01185
C00002	YLR240W	C04628
C00002	YLR240W	C11472
C00002	YLR240W	C16489
C00002	YLR260W	C00008
C00002	YLR260W	C00631
C00002	YLR260W	C01120
C00002	YLR260W	C01185
C00002	YLR260W	C04628
C00002	YLR260W	C06124
C00002	YLR260W	C11472
C00002	YLR260W	C16489
C00002	YLR295C	C00008
C00002	YLR305C	C00008
C00002	YLR305C	C00631
C00002	YLR305C	C01185
C00002	YLR305C	C04628
C00002	YLR305C	C11472
C00002	YLR305C	C16489
C00002	YLR306W	C00020
C00002	YLR318W	C06397
C00002	YLR328W	C00003
C00002	YLR328W	C00857
C00002	YLR328W	C06397
C00002	YLR382C	C00020
C00002	YLR447C	C00008
C00002	YML068W	C00020
C00002	YML070W	C00008
C00002	YML070W	C00111
C00002	YML070W	C00631
C00002	YML070W	C01185
C00002	YML070W	C04628
C00002	YML070W	C11472
C00002	YML070W	C16489
C00002	YMR001C	C00008
C00002	YMR013C	C00008
C00002	YMR013C	C00631
C00002	YMR013C	C01185
C00002	YMR013C	C04628
C00002	YMR013C	C11472
C00002	YMR013C	C16489
C00002	YMR022W	C00020
C00002	YMR054W	C00008
C00002	YMR104C	C00008
C00002	YMR113W	C00008
C00002	YMR120C	C00008
C00002	YMR139W	C00008
C00002	YMR162C	C00008
C00002	YMR205C	C00008
C00002	YMR205C	C00354
C00002	YMR205C	C00447
C00002	YMR205C	C00631
C00002	YMR205C	C01185
C00002	YMR205C	C03785
C00002	YMR205C	C04628
C00002	YMR205C	C05378
C00002	YMR205C	C11472
C00002	YMR205C	C16489
C00002	YMR208W	C00008
C00002	YMR208W	C00631
C00002	YMR208W	C01107
C00002	YMR208W	C01185
C00002	YMR208W	C04628
C00002	YMR208W	C11472
C00002	YMR208W	C16489
C00002	YMR216C	C00008
C00002	YMR217W	C00008
C00002	YMR217W	C00020
C00002	YMR220W	C00008
C00002	YMR220W	C01143
C00002	YMR246W	C00008
C00002	YMR246W	C00020
C00002	YMR293C	C00008
C00002	YNL073W	C00020
C00002	YNL102W	C06397
C00002	YNL113W	C06397
C00002	YNL151C	C06397
C00002	YNL154C	C00008
C00002	YNL207W	C00008
C00002	YNL220W	C00008
C00002	YNL247W	C00020
C00002	YNL248C	C06397
C00002	YNL256W	C00020
C00002	YNL256W	C04807
C00002	YNL262W	C06397
C00002	YNL267W	C00008
C00002	YNL267W	C00631
C00002	YNL267W	C01185
C00002	YNL267W	C04628
C00002	YNL267W	C11472
C00002	YNL267W	C16489
C00002	YNR003C	C06397
C00002	YNR012W	C00008
C00002	YNR012W	C00055
C00002	YNR012W	C00105
C00002	YNR012W	C00631
C00002	YNR012W	C01185
C00002	YNR012W	C04628
C00002	YNR012W	C11472
C00002	YNR012W	C16489
C00002	YNR016C	C00008
C00002	YNR027W	C00008
C00002	YNR027W	C00018
C00002	YNR027W	C00627
C00002	YNR027W	C00631
C00002	YNR027W	C00647
C00002	YNR027W	C01185
C00002	YNR027W	C04628
C00002	YNR027W	C11472
C00002	YNR027W	C16489
C00002	YNR031C	C00008
C00002	YNR043W	C00008
C00002	YNR057C	C00008
C00002	YOL013C	C00020
C00002	YOL016C	C00008
C00002	YOL033W	C00020
C00002	YOL049W	C00008
C00002	YOL055C	C00008
C00002	YOL055C	C04752
C00002	YOL058W	C00008
C00002	YOL058W	C00020
C00002	YOL061W	C00020
C00002	YOL061W	C00119
C00002	YOL097C	C00020
C00002	YOL102C	C00008
C00002	YOL102C	C00631
C00002	YOL102C	C01185
C00002	YOL102C	C04628
C00002	YOL102C	C11472
C00002	YOL102C	C16489
C00002	YOL115W	C06397
C00002	YOL136C	C00008
C00002	YOL136C	C00631
C00002	YOL136C	C00665
C00002	YOL136C	C01185
C00002	YOL136C	C04628
C00002	YOL136C	C11472
C00002	YOL136C	C16489
C00002	YOR005C	C00020
C00002	YOR061W	C00008
C00002	YOR116C	C06397
C00002	YOR119C	C00008
C00002	YOR142W	C00008
C00002	YOR142W	C00020
C00002	YOR143C	C00008
C00002	YOR143C	C00020
C00002	YOR143C	C00068
C00002	YOR143C	C03028
C00002	YOR151C	C06397
C00002	YOR168W	C00020
C00002	YOR171C	C00008
C00002	YOR171C	C00631
C00002	YOR171C	C01120
C00002	YOR171C	C01185
C00002	YOR171C	C04628
C00002	YOR171C	C06124
C00002	YOR171C	C11472
C00002	YOR171C	C16489
C00002	YOR207C	C06397
C00002	YOR231W	C00008
C00002	YOR241W	C00008
C00002	YOR270C	C00008
C00002	YOR303W	C00008
C00002	YOR303W	C00169
C00002	YOR317W	C00008
C00002	YOR317W	C00020
C00002	YOR330C	C06397
C00002	YOR332W	C00008
C00002	YOR335C	C00020
C00002	YOR339C	C00020
C00002	YOR340C	C06397
C00002	YOR341W	C06397
C00002	YOR347C	C00008
C00002	YOR347C	C00074
C00002	YOR347C	C00631
C00002	YOR347C	C01185
C00002	YOR347C	C04628
C00002	YOR347C	C11472
C00002	YOR347C	C16489
C00002	YOR351C	C00008
C00002	YPL031C	C00008
C00002	YPL036W	C00008
C00002	YPL040C	C00020
C00002	YPL078C	C00008
C00002	YPL097W	C00020
C00002	YPL104W	C00020
C00002	YPL160W	C00020
C00002	YPL167C	C06397
C00002	YPL203W	C00008
C00002	YPL204W	C00008
C00002	YPL209C	C00008
C00002	YPL214C	C00008
C00002	YPL214C	C00631
C00002	YPL214C	C01185
C00002	YPL214C	C04327
C00002	YPL214C	C04628
C00002	YPL214C	C11472
C00002	YPL214C	C16489
C00002	YPL234C	C00008
C00002	YPL236C	C00008
C00002	YPL258C	C00008
C00002	YPL258C	C04752
C00002	YPL271W	C00008
C00002	YPR010C	C06397
C00002	YPR020W	C00008
C00002	YPR033C	C00020
C00002	YPR035W	C00008
C00002	YPR036W	C00008
C00002	YPR047W	C00020
C00002	YPR054W	C00008
C00002	YPR066W	C00020
C00002	YPR081C	C00020
C00002	YPR110C	C06397
C00002	YPR145W	C00008
C00002	YPR145W	C00020
C00002	YPR161C	C00008
C00002	YPR175W	C06397
C00002	YPR180W	C00020
C00002	YPR190C	C06397
C00002	YHR039C-A	C00008
C00002	YML081C-A	C00008
C00003	Q0045	C00004
C00003	Q0065	C00004
C00003	Q0070	C00004
C00003	Q0105	C00004
C00003	Q0110	C00004
C00003	Q0115	C00004
C00003	Q0120	C00004
C00003	Q0250	C00004
C00003	Q0275	C00004
C00003	YAL062W	C00004
C00003	YAR071W	C00006
C00003	YBL045C	C00004
C00003	YBL056W	C00006
C00003	YBL064C	C00004
C00003	YBL098W	C00004
C00003	YBR006W	C00004
C00003	YBR026C	C00004
C00003	YBR035C	C00004
C00003	YBR046C	C00004
C00003	YBR084W	C00004
C00003	YBR092C	C00006
C00003	YBR093C	C00006
C00003	YBR115C	C00004
C00003	YBR125C	C00006
C00003	YBR145W	C00004
C00003	YBR149W	C00004
C00003	YBR153W	C00004
C00003	YBR166C	C00004
C00003	YBR213W	C00004
C00003	YBR221C	C00004
C00003	YBR244W	C00004
C00003	YBR265W	C00004
C00003	YBR276C	C00006
C00003	YCL018W	C00004
C00003	YCL030C	C00004
C00003	YDL006W	C00006
C00003	YDL022W	C00004
C00003	YDL024C	C00006
C00003	YDL047W	C00006
C00003	YDL066W	C00004
C00003	YDL067C	C00004
C00003	YDL078C	C00004
C00003	YDL085W	C00004
C00003	YDL134C	C00006
C00003	YDL168W	C00004
C00003	YDL171C	C00004
C00003	YDL174C	C00004
C00003	YDL188C	C00006
C00003	YDL215C	C00004
C00003	YDL230W	C00006
C00003	YDL236W	C00006
C00003	YDL246C	C00004
C00003	YDR019C	C00004
C00003	YDR044W	C00004
C00003	YDR074W	C00006
C00003	YDR075W	C00006
C00003	YDR127W	C00004
C00003	YDR148C	C00004
C00003	YDR158W	C00004
C00003	YDR178W	C00004
C00003	YDR256C	C00004
C00003	YDR287W	C00006
C00003	YDR347W	C00004
C00003	YDR353W	C00004
C00003	YDR376W	C00004
C00003	YDR402C	C00004
C00003	YDR436W	C00006
C00003	YDR453C	C00004
C00003	YDR481C	C00006
C00003	YDR529C	C00004
C00003	YEL024W	C00004
C00003	YEL038W	C00006
C00003	YER014W	C00004
C00003	YER023W	C00004
C00003	YER042W	C00004
C00003	YER062C	C00006
C00003	YER069W	C00004
C00003	YER070W	C00004
C00003	YER073W	C00004
C00003	YER075C	C00006
C00003	YER081W	C00004
C00003	YER089C	C00006
C00003	YER133W	C00006
C00003	YER178W	C00004
C00003	YFL018C	C00004
C00003	YFR025C	C00006
C00003	YFR028C	C00006
C00003	YFR030W	C00004
C00003	YFR033C	C00004
C00003	YGL001C	C00004
C00003	YGL012W	C00004
C00003	YGL055W	C00004
C00003	YGL125W	C00004
C00003	YGL154C	C00004
C00003	YGL187C	C00004
C00003	YGL191W	C00004
C00003	YGL205W	C00004
C00003	YGL256W	C00004
C00003	YGR010W	C00455
C00003	YGR060W	C00004
C00003	YGR088W	C00004
C00003	YGR123C	C00006
C00003	YGR175C	C00004
C00003	YGR180C	C00004
C00003	YGR183C	C00004
C00003	YGR192C	C00004
C00003	YGR204W	C00004
C00003	YGR208W	C00006
C00003	YGR234W	C00004
C00003	YGR256W	C00004
C00003	YHR007C	C00004
C00003	YHR008C	C00004
C00003	YHR037W	C00004
C00003	YHR042W	C00004
C00003	YHR043C	C00006
C00003	YHR044C	C00006
C00003	YHR046C	C00006
C00003	YHR051W	C00004
C00003	YHR063C	C00004
C00003	YHR068W	C00004
C00003	YHR074W	C00064
C00003	YHR074W	C00857
C00003	YHR104W	C00004
C00003	YHR106W	C00004
C00003	YHR179W	C00004
C00003	YHR183W	C00004
C00003	YHR215W	C00006
C00003	YHR216W	C00004
C00003	YIL010W	C00004
C00003	YIL043C	C00004
C00003	YIL049W	C00004
C00003	YIL053W	C00006
C00003	YIL066C	C00004
C00003	YIL074C	C00004
C00003	YIL094C	C00004
C00003	YIL111W	C00004
C00003	YIL113W	C00006
C00003	YIL124W	C00004
C00003	YIL125W	C00004
C00003	YIL155C	C00004
C00003	YIR026C	C00006
C00003	YIR034C	C00004
C00003	YIR037W	C00004
C00003	YJL026W	C00004
C00003	YJL045W	C00004
C00003	YJL052W	C00004
C00003	YJL155C	C00006
C00003	YJL166W	C00004
C00003	YJR009C	C00004
C00003	YJR025C	C00004
C00003	YJR070C	C00004
C00003	YJR078W	C00004
C00003	YJR101W	C00004
C00003	YJR104C	C00004
C00003	YJR139C	C00004
C00003	YJR159W	C00004
C00003	YKL026C	C00004
C00003	YKL029C	C00004
C00003	YKL085W	C00004
C00003	YKL086W	C00004
C00003	YKL141W	C00004
C00003	YKL148C	C00004
C00003	YKL150W	C00004
C00003	YKL182W	C00004
C00003	YKL192C	C00004
C00003	YKL216W	C00004
C00003	YKR066C	C00004
C00003	YKR080W	C00004
C00003	YLL041C	C00004
C00003	YLL051C	C00004
C00003	YLR038C	C00004
C00003	YLR070C	C00004
C00003	YLR100W	C00004
C00003	YLR109W	C00004
C00003	YLR142W	C00004
C00003	YLR164W	C00004
C00003	YLR174W	C00004
C00003	YLR328W	C00455
C00003	YLR355C	C00004
C00003	YLR377C	C00006
C00003	YLR395C	C00004
C00003	YLR432W	C00004
C00003	YLR433C	C00006
C00003	YLR450W	C00004
C00003	YML016C	C00006
C00003	YML028W	C00004
C00003	YML054C	C00004
C00003	YML056C	C00004
C00003	YML057W	C00006
C00003	YML075C	C00004
C00003	YML086C	C00004
C00003	YML120C	C00004
C00003	YMR009W	C00004
C00003	YMR036C	C00006
C00003	YMR083W	C00004
C00003	YMR118C	C00004
C00003	YMR145C	C00004
C00003	YMR156C	C00006
C00003	YMR169C	C00004
C00003	YMR170C	C00004
C00003	YMR180C	C00006
C00003	YMR189W	C00004
C00003	YMR256C	C00004
C00003	YMR277W	C00006
C00003	YMR303C	C00004
C00003	YNL009W	C00004
C00003	YNL037C	C00004
C00003	YNL052W	C00004
C00003	YNL053W	C00006
C00003	YNL071W	C00004
C00003	YNL106C	C00006
C00003	YNL202W	C00004
C00003	YNL241C	C00004
C00003	YNL280C	C00004
C00003	YNR032W	C00006
C00003	YNR050C	C00004
C00003	YOL059W	C00004
C00003	YOL064C	C00006
C00003	YOL065C	C00006
C00003	YOL086C	C00004
C00003	YOL126C	C00004
C00003	YOL152W	C00004
C00003	YOR065W	C00004
C00003	YOR109W	C00006
C00003	YOR136W	C00004
C00003	YOR208W	C00006
C00003	YOR236W	C00004
C00003	YOR323C	C00004
C00003	YOR356W	C00004
C00003	YOR374W	C00004
C00003	YOR375C	C00004
C00003	YOR381W	C00004
C00003	YOR384W	C00004
C00003	YOR388C	C00004
C00003	YPL017C	C00004
C00003	YPL061W	C00004
C00003	YPL091W	C00004
C00003	YPL171C	C00004
C00003	YPL179W	C00006
C00003	YPL228W	C00006
C00003	YPL231W	C00004
C00003	YPR073C	C00006
C00003	YPR127W	C00004
C00003	YPR167C	C00004
C00003	YPR191W	C00004
C00003	YHR001W-A	C00004
C00005	Q0045	C00006
C00005	Q0065	C00006
C00005	Q0070	C00006
C00005	Q0105	C00006
C00005	Q0110	C00006
C00005	Q0115	C00006
C00005	Q0120	C00006
C00005	Q0250	C00006
C00005	Q0275	C00006
C00005	YAL062W	C00006
C00005	YBL045C	C00006
C00005	YBL064C	C00006
C00005	YBL098W	C00006
C00005	YBR006W	C00006
C00005	YBR026C	C00006
C00005	YBR035C	C00006
C00005	YBR046C	C00006
C00005	YBR084W	C00006
C00005	YBR115C	C00006
C00005	YBR145W	C00006
C00005	YBR149W	C00006
C00005	YBR153W	C00006
C00005	YBR166C	C00006
C00005	YBR213W	C00006
C00005	YBR221C	C00006
C00005	YBR244W	C00006
C00005	YBR265W	C00006
C00005	YCL018W	C00006
C00005	YCL030C	C00006
C00005	YDL022W	C00006
C00005	YDL066W	C00006
C00005	YDL067C	C00006
C00005	YDL078C	C00006
C00005	YDL085W	C00006
C00005	YDL168W	C00006
C00005	YDL171C	C00006
C00005	YDL174C	C00006
C00005	YDL215C	C00006
C00005	YDL246C	C00006
C00005	YDR044W	C00006
C00005	YDR127W	C00006
C00005	YDR158W	C00006
C00005	YDR178W	C00006
C00005	YDR234W	C00006
C00005	YDR256C	C00006
C00005	YDR347W	C00006
C00005	YDR353W	C00006
C00005	YDR376W	C00006
C00005	YDR402C	C00006
C00005	YDR453C	C00006
C00005	YDR529C	C00006
C00005	YEL024W	C00006
C00005	YER014W	C00006
C00005	YER023W	C00006
C00005	YER042W	C00006
C00005	YER069W	C00006
C00005	YER070W	C00006
C00005	YER073W	C00006
C00005	YER081W	C00006
C00005	YER178W	C00006
C00005	YFL018C	C00006
C00005	YFR030W	C00006
C00005	YFR033C	C00006
C00005	YGL001C	C00006
C00005	YGL009C	C00006
C00005	YGL012W	C00006
C00005	YGL026C	C00006
C00005	YGL040C	C00006
C00005	YGL055W	C00006
C00005	YGL063W	C00006
C00005	YGL125W	C00006
C00005	YGL154C	C00006
C00005	YGL187C	C00006
C00005	YGL191W	C00006
C00005	YGL205W	C00006
C00005	YGL256W	C00006
C00005	YGR060W	C00006
C00005	YGR088W	C00006
C00005	YGR155W	C00006
C00005	YGR175C	C00006
C00005	YGR180C	C00006
C00005	YGR183C	C00006
C00005	YGR192C	C00006
C00005	YGR204W	C00006
C00005	YGR234W	C00006
C00005	YGR254W	C00006
C00005	YGR256W	C00006
C00005	YHR007C	C00006
C00005	YHR008C	C00006
C00005	YHR037W	C00006
C00005	YHR042W	C00006
C00005	YHR051W	C00006
C00005	YHR063C	C00006
C00005	YHR104W	C00006
C00005	YHR106W	C00006
C00005	YHR174W	C00006
C00005	YHR179W	C00006
C00005	YHR183W	C00006
C00005	YHR190W	C00006
C00005	YHR216W	C00006
C00005	YIL010W	C00006
C00005	YIL043C	C00006
C00005	YIL049W	C00006
C00005	YIL066C	C00006
C00005	YIL074C	C00006
C00005	YIL094C	C00006
C00005	YIL111W	C00006
C00005	YIL124W	C00006
C00005	YIL125W	C00006
C00005	YIL155C	C00006
C00005	YIR034C	C00006
C00005	YIR037W	C00006
C00005	YJL026W	C00006
C00005	YJL045W	C00006
C00005	YJL052W	C00006
C00005	YJL166W	C00006
C00005	YJL200C	C00006
C00005	YJR009C	C00006
C00005	YJR016C	C00006
C00005	YJR024C	C00006
C00005	YJR025C	C00006
C00005	YJR070C	C00006
C00005	YJR078W	C00006
C00005	YJR101W	C00006
C00005	YJR104C	C00006
C00005	YJR139C	C00006
C00005	YJR159W	C00006
C00005	YKL026C	C00006
C00005	YKL029C	C00006
C00005	YKL085W	C00006
C00005	YKL086W	C00006
C00005	YKL141W	C00006
C00005	YKL148C	C00006
C00005	YKL150W	C00006
C00005	YKL182W	C00006
C00005	YKL192C	C00006
C00005	YKL216W	C00006
C00005	YKR066C	C00006
C00005	YKR080W	C00006
C00005	YLL041C	C00006
C00005	YLL051C	C00006
C00005	YLR038C	C00006
C00005	YLR070C	C00006
C00005	YLR100W	C00006
C00005	YLR109W	C00006
C00005	YLR142W	C00006
C00005	YLR164W	C00006
C00005	YLR174W	C00006
C00005	YLR304C	C00006
C00005	YLR355C	C00006
C00005	YLR395C	C00006
C00005	YLR432W	C00006
C00005	YLR450W	C00006
C00005	YML028W	C00006
C00005	YML054C	C00006
C00005	YML056C	C00006
C00005	YML075C	C00006
C00005	YML086C	C00006
C00005	YML120C	C00006
C00005	YMR009W	C00006
C00005	YMR083W	C00006
C00005	YMR118C	C00006
C00005	YMR145C	C00006
C00005	YMR169C	C00006
C00005	YMR170C	C00006
C00005	YMR189W	C00006
C00005	YMR256C	C00006
C00005	YMR303C	C00006
C00005	YMR323W	C00006
C00005	YNL009W	C00006
C00005	YNL037C	C00006
C00005	YNL052W	C00006
C00005	YNL202W	C00006
C00005	YNL241C	C00006
C00005	YNL280C	C00006
C00005	YNL316C	C00006
C00005	YNR050C	C00006
C00005	YOL059W	C00006
C00005	YOL086C	C00006
C00005	YOL126C	C00006
C00005	YOL152W	C00006
C00005	YOR065W	C00006
C00005	YOR136W	C00006
C00005	YOR202W	C00006
C00005	YOR236W	C00006
C00005	YOR278W	C00006
C00005	YOR323C	C00006
C00005	YOR356W	C00006
C00005	YOR374W	C00006
C00005	YOR375C	C00006
C00005	YOR381W	C00006
C00005	YOR384W	C00006
C00005	YOR388C	C00006
C00005	YOR393W	C00006
C00005	YPL017C	C00006
C00005	YPL061W	C00006
C00005	YPL091W	C00006
C00005	YPL171C	C00006
C00005	YPL231W	C00006
C00005	YPL262W	C00006
C00005	YPR002W	C00006
C00005	YPR127W	C00006
C00005	YPR167C	C00006
C00005	YPR191W	C00006
C00005	YHR001W-A	C00006
C00008	YCL050C	C00224
C00008	YCL050C	C01260
C00008	YDR226W	C00020
C00008	YDR530C	C01260
C00008	YER005W	C00020
C00008	YER070W	C00206
C00008	YER170W	C00020
C00008	YGR180C	C00206
C00008	YIL066C	C00206
C00008	YJL026W	C00206
C00010	YAL054C	C00024
C00010	YAL054C	C00100
C00010	YAL054C	C05338
C00010	YAL054C	C05668
C00010	YAL054C	C06671
C00010	YAL054C	C07118
C00010	YAL054C	C09823
C00010	YAL054C	C14143
C00010	YAL054C	C16268
C00010	YAL054C	C16464
C00010	YAR035W	C00024
C00010	YAR035W	C00083
C00010	YAR035W	C00154
C00010	YAR035W	C00223
C00010	YAR035W	C00323
C00010	YAR035W	C00406
C00010	YAR035W	C00512
C00010	YAR035W	C00527
C00010	YAR035W	C00582
C00010	YAR035W	C03561
C00010	YAR035W	C05338
C00010	YBL015W	C00024
C00010	YBL015W	C15547
C00010	YBL052C	C00024
C00010	YBL052C	C00083
C00010	YBL052C	C00154
C00010	YBL052C	C00223
C00010	YBL052C	C00323
C00010	YBL052C	C00406
C00010	YBL052C	C00512
C00010	YBL052C	C00527
C00010	YBL052C	C00582
C00010	YBL052C	C03561
C00010	YBL052C	C05338
C00010	YBL067C	C15547
C00010	YBR026C	C00083
C00010	YBR026C	C00223
C00010	YBR058C	C15547
C00010	YBR145W	C00024
C00010	YBR149W	C00024
C00010	YBR153W	C00024
C00010	YBR166C	C00083
C00010	YBR166C	C00223
C00010	YBR213W	C00083
C00010	YBR213W	C00223
C00010	YBR221C	C00024
C00010	YBR265W	C00024
C00010	YCL018W	C00024
C00010	YCL030C	C00024
C00010	YCR005C	C00024
C00010	YCR005C	C00154
C00010	YCR048W	C00024
C00010	YCR048W	C00083
C00010	YCR048W	C00154
C00010	YCR048W	C00223
C00010	YCR048W	C00323
C00010	YCR048W	C00406
C00010	YCR048W	C00512
C00010	YCR048W	C00527
C00010	YCR048W	C00582
C00010	YCR048W	C03561
C00010	YCR048W	C05338
C00010	YDL022W	C00024
C00010	YDL040C	C00024
C00010	YDL040C	C00083
C00010	YDL040C	C00154
C00010	YDL040C	C00223
C00010	YDL040C	C00323
C00010	YDL040C	C00406
C00010	YDL040C	C00512
C00010	YDL040C	C00527
C00010	YDL040C	C00582
C00010	YDL040C	C03561
C00010	YDL040C	C05338
C00010	YDL052C	C00024
C00010	YDL052C	C00083
C00010	YDL052C	C00154
C00010	YDL052C	C00223
C00010	YDL052C	C00323
C00010	YDL052C	C00406
C00010	YDL052C	C00512
C00010	YDL052C	C00527
C00010	YDL052C	C00582
C00010	YDL052C	C03561
C00010	YDL052C	C05338
C00010	YDL066W	C00024
C00010	YDL078C	C00024
C00010	YDL122W	C15547
C00010	YDL131W	C00024
C00010	YDL131W	C00154
C00010	YDL168W	C00024
C00010	YDL182W	C00024
C00010	YDL182W	C00154
C00010	YDL246C	C00024
C00010	YDR062W	C00024
C00010	YDR062W	C00083
C00010	YDR062W	C00154
C00010	YDR062W	C00223
C00010	YDR062W	C00323
C00010	YDR062W	C00406
C00010	YDR062W	C00512
C00010	YDR062W	C00527
C00010	YDR062W	C00582
C00010	YDR062W	C03561
C00010	YDR062W	C05338
C00010	YDR069C	C15547
C00010	YDR127W	C00024
C00010	YDR148C	C00024
C00010	YDR148C	C00083
C00010	YDR148C	C00091
C00010	YDR148C	C00154
C00010	YDR148C	C00223
C00010	YDR148C	C00323
C00010	YDR148C	C00406
C00010	YDR148C	C00512
C00010	YDR148C	C00527
C00010	YDR148C	C00582
C00010	YDR148C	C03561
C00010	YDR148C	C05338
C00010	YDR196C	C00882
C00010	YDR232W	C00024
C00010	YDR232W	C00083
C00010	YDR232W	C00091
C00010	YDR232W	C00154
C00010	YDR232W	C00223
C00010	YDR232W	C00323
C00010	YDR232W	C00406
C00010	YDR232W	C00512
C00010	YDR232W	C00527
C00010	YDR232W	C00582
C00010	YDR232W	C03561
C00010	YDR232W	C05338
C00010	YDR272W	C15547
C00010	YER015W	C00154
C00010	YER015W	C05338
C00010	YER015W	C05668
C00010	YER015W	C06671
C00010	YER015W	C07118
C00010	YER015W	C09823
C00010	YER015W	C14143
C00010	YER015W	C16268
C00010	YER015W	C16464
C00010	YER061C	C00024
C00010	YER061C	C00083
C00010	YER061C	C00154
C00010	YER061C	C00223
C00010	YER061C	C00323
C00010	YER061C	C00406
C00010	YER061C	C00512
C00010	YER061C	C00527
C00010	YER061C	C00582
C00010	YER061C	C03561
C00010	YER061C	C05338
C00010	YER065C	C00024
C00010	YER081W	C00024
C00010	YER090W	C00024
C00010	YER098W	C15547
C00010	YER144C	C15547
C00010	YER151C	C15547
C00010	YER178W	C00024
C00010	YFL017C	C00024
C00010	YFL017C	C00083
C00010	YFL017C	C00154
C00010	YFL017C	C00223
C00010	YFL017C	C00323
C00010	YFL017C	C00406
C00010	YFL017C	C00512
C00010	YFL017C	C00527
C00010	YFL017C	C00582
C00010	YFL017C	C03561
C00010	YFL017C	C05338
C00010	YFL018C	C00024
C00010	YFL018C	C00091
C00010	YFL018C	C00527
C00010	YFR010W	C15547
C00010	YGL001C	C00024
C00010	YGL012W	C00083
C00010	YGL012W	C00223
C00010	YGL017W	C00154
C00010	YGL256W	C00024
C00010	YGR147C	C00024
C00010	YGR147C	C00083
C00010	YGR147C	C00154
C00010	YGR147C	C00223
C00010	YGR147C	C00323
C00010	YGR147C	C00406
C00010	YGR147C	C00512
C00010	YGR147C	C00527
C00010	YGR147C	C00582
C00010	YGR147C	C03561
C00010	YGR147C	C05338
C00010	YGR177C	C00024
C00010	YGR177C	C00083
C00010	YGR177C	C00154
C00010	YGR177C	C00223
C00010	YGR177C	C00323
C00010	YGR177C	C00406
C00010	YGR177C	C00512
C00010	YGR177C	C00527
C00010	YGR177C	C00582
C00010	YGR177C	C03561
C00010	YGR177C	C05338
C00010	YGR244C	C00091
C00010	YGR244C	C00531
C00010	YGR244C	C05338
C00010	YGR244C	C05668
C00010	YGR244C	C06671
C00010	YGR244C	C07118
C00010	YGR244C	C09823
C00010	YGR244C	C14143
C00010	YGR244C	C16268
C00010	YGR244C	C16464
C00010	YGR252W	C00024
C00010	YGR252W	C00083
C00010	YGR252W	C00154
C00010	YGR252W	C00223
C00010	YGR252W	C00323
C00010	YGR252W	C00406
C00010	YGR252W	C00512
C00010	YGR252W	C00527
C00010	YGR252W	C00582
C00010	YGR252W	C03561
C00010	YGR252W	C05338
C00010	YGR256W	C00024
C00010	YHL003C	C00024
C00010	YHL003C	C00083
C00010	YHL003C	C00154
C00010	YHL003C	C00223
C00010	YHL003C	C00323
C00010	YHL003C	C00406
C00010	YHL003C	C00512
C00010	YHL003C	C00527
C00010	YHL003C	C00582
C00010	YHL003C	C03561
C00010	YHL003C	C05338
C00010	YHR063C	C00024
C00010	YHR104W	C00024
C00010	YHR183W	C00024
C00010	YHR216W	C00024
C00010	YIL009W	C00154
C00010	YIL009W	C05338
C00010	YIL009W	C05668
C00010	YIL009W	C06671
C00010	YIL009W	C07118
C00010	YIL009W	C09823
C00010	YIL009W	C14143
C00010	YIL009W	C16268
C00010	YIL009W	C16464
C00010	YIL074C	C00024
C00010	YIL094C	C00024
C00010	YIL124W	C00024
C00010	YIL125W	C00091
C00010	YIL125W	C00527
C00010	YIL156W	C15547
C00010	YIL160C	C00024
C00010	YIL160C	C00083
C00010	YIL160C	C00091
C00010	YIL160C	C00136
C00010	YIL160C	C00154
C00010	YIL160C	C00223
C00010	YIL160C	C00323
C00010	YIL160C	C00406
C00010	YIL160C	C00512
C00010	YIL160C	C00527
C00010	YIL160C	C00582
C00010	YIL160C	C01832
C00010	YIL160C	C01944
C00010	YIL160C	C02593
C00010	YIL160C	C03069
C00010	YIL160C	C03561
C00010	YIL160C	C05270
C00010	YIL160C	C05274
C00010	YIL160C	C05337
C00010	YIL160C	C05338
C00010	YIL160C	C16470
C00010	YIR031C	C00024
C00010	YIR031C	C00154
C00010	YJL197W	C15547
C00010	YJR019C	C00154
C00010	YJR019C	C00412
C00010	YJR019C	C00510
C00010	YJR019C	C02050
C00010	YJR019C	C02249
C00010	YJR019C	C03035
C00010	YJR019C	C03595
C00010	YJR019C	C15547
C00010	YJR019C	C16162
C00010	YJR139C	C00024
C00010	YJR159W	C00024
C00010	YKL008C	C00024
C00010	YKL008C	C00083
C00010	YKL008C	C00154
C00010	YKL008C	C00223
C00010	YKL008C	C00323
C00010	YKL008C	C00406
C00010	YKL008C	C00512
C00010	YKL008C	C00527
C00010	YKL008C	C00582
C00010	YKL008C	C03561
C00010	YKL008C	C05338
C00010	YKL029C	C00024
C00010	YKL085W	C00024
C00010	YKL182W	C00024
C00010	YKL182W	C00083
C00010	YKL182W	C00154
C00010	YKL182W	C00223
C00010	YKL182W	C00323
C00010	YKL182W	C00406
C00010	YKL182W	C00512
C00010	YKL182W	C00527
C00010	YKL182W	C00582
C00010	YKL182W	C03561
C00010	YKL182W	C05338
C00010	YKL211C	C00024
C00010	YKR098C	C15547
C00010	YLR070C	C00024
C00010	YLR100W	C00024
C00010	YLR153C	C00024
C00010	YLR153C	C00100
C00010	YLR153C	C05338
C00010	YLR153C	C05668
C00010	YLR153C	C06671
C00010	YLR153C	C07118
C00010	YLR153C	C09823
C00010	YLR153C	C14143
C00010	YLR153C	C16268
C00010	YLR153C	C16464
C00010	YLR174W	C00024
C00010	YLR195C	C00024
C00010	YLR195C	C00083
C00010	YLR195C	C00154
C00010	YLR195C	C00223
C00010	YLR195C	C00323
C00010	YLR195C	C00406
C00010	YLR195C	C00512
C00010	YLR195C	C00527
C00010	YLR195C	C00582
C00010	YLR195C	C02593
C00010	YLR195C	C03561
C00010	YLR195C	C05338
C00010	YLR239C	C00024
C00010	YLR239C	C00083
C00010	YLR239C	C00154
C00010	YLR239C	C00223
C00010	YLR239C	C00323
C00010	YLR239C	C00406
C00010	YLR239C	C00512
C00010	YLR239C	C00527
C00010	YLR239C	C00582
C00010	YLR239C	C03561
C00010	YLR239C	C05338
C00010	YLR299W	C00154
C00010	YLR355C	C00024
C00010	YLR432W	C00024
C00010	YLR450W	C00024
C00010	YLR450W	C00356
C00010	YML042W	C00024
C00010	YML042W	C00083
C00010	YML042W	C00154
C00010	YML042W	C00223
C00010	YML042W	C00323
C00010	YML042W	C00406
C00010	YML042W	C00512
C00010	YML042W	C00527
C00010	YML042W	C00582
C00010	YML042W	C03561
C00010	YML042W	C05338
C00010	YML056C	C00024
C00010	YML075C	C00024
C00010	YML075C	C00356
C00010	YML126C	C00024
C00010	YML126C	C00154
C00010	YMR062C	C00024
C00010	YMR062C	C00083
C00010	YMR062C	C00154
C00010	YMR062C	C00223
C00010	YMR062C	C00323
C00010	YMR062C	C00406
C00010	YMR062C	C00512
C00010	YMR062C	C00527
C00010	YMR062C	C00582
C00010	YMR062C	C03561
C00010	YMR062C	C05338
C00010	YMR083W	C00024
C00010	YMR127C	C00024
C00010	YMR127C	C00083
C00010	YMR127C	C00154
C00010	YMR127C	C00223
C00010	YMR127C	C00323
C00010	YMR127C	C00406
C00010	YMR127C	C00512
C00010	YMR127C	C00527
C00010	YMR127C	C00582
C00010	YMR127C	C03561
C00010	YMR127C	C05338
C00010	YMR223W	C15547
C00010	YMR246W	C00154
C00010	YMR246W	C05338
C00010	YMR246W	C05668
C00010	YMR246W	C06671
C00010	YMR246W	C07118
C00010	YMR246W	C09823
C00010	YMR246W	C14143
C00010	YMR246W	C16268
C00010	YMR246W	C16464
C00010	YMR296C	C00024
C00010	YMR296C	C00083
C00010	YMR296C	C00154
C00010	YMR296C	C00223
C00010	YMR296C	C00323
C00010	YMR296C	C00406
C00010	YMR296C	C00512
C00010	YMR296C	C00527
C00010	YMR296C	C00582
C00010	YMR296C	C03561
C00010	YMR296C	C05338
C00010	YMR303C	C00024
C00010	YMR304W	C15547
C00010	YNL009W	C00024
C00010	YNL037C	C00024
C00010	YNL071W	C00024
C00010	YNL071W	C00083
C00010	YNL071W	C00154
C00010	YNL071W	C00223
C00010	YNL071W	C00323
C00010	YNL071W	C00406
C00010	YNL071W	C00512
C00010	YNL071W	C00527
C00010	YNL071W	C00582
C00010	YNL071W	C03561
C00010	YNL071W	C05338
C00010	YNL104C	C00024
C00010	YNL104C	C00154
C00010	YNL117W	C00024
C00010	YNL117W	C00154
C00010	YNL186W	C15547
C00010	YNL202W	C00083
C00010	YNL202W	C00223
C00010	YNL241C	C00024
C00010	YNL277W	C00024
C00010	YNL277W	C00083
C00010	YNL277W	C00154
C00010	YNL277W	C00223
C00010	YNL277W	C00323
C00010	YNL277W	C00406
C00010	YNL277W	C00512
C00010	YNL277W	C00527
C00010	YNL277W	C00582
C00010	YNL277W	C03561
C00010	YNL277W	C05338
C00010	YNL280C	C00083
C00010	YNL280C	C00223
C00010	YNR001C	C00024
C00010	YNR001C	C00154
C00010	YNR008W	C00024
C00010	YNR008W	C00083
C00010	YNR008W	C00154
C00010	YNR008W	C00223
C00010	YNR008W	C00323
C00010	YNR008W	C00406
C00010	YNR008W	C00512
C00010	YNR008W	C00527
C00010	YNR008W	C00582
C00010	YNR008W	C03561
C00010	YNR008W	C05338
C00010	YNR019W	C00024
C00010	YNR019W	C00083
C00010	YNR019W	C00154
C00010	YNR019W	C00223
C00010	YNR019W	C00323
C00010	YNR019W	C00406
C00010	YNR019W	C00512
C00010	YNR019W	C00527
C00010	YNR019W	C00582
C00010	YNR019W	C03561
C00010	YNR019W	C05338
C00010	YOL059W	C00024
C00010	YOL086C	C00024
C00010	YOL126C	C00024
C00010	YOR040W	C15547
C00010	YOR124C	C15547
C00010	YOR136W	C00024
C00010	YOR142W	C00091
C00010	YOR142W	C00531
C00010	YOR142W	C05338
C00010	YOR142W	C05668
C00010	YOR142W	C06671
C00010	YOR142W	C07118
C00010	YOR142W	C09823
C00010	YOR142W	C14143
C00010	YOR142W	C16268
C00010	YOR142W	C16464
C00010	YOR244W	C00024
C00010	YOR244W	C00083
C00010	YOR244W	C00154
C00010	YOR244W	C00223
C00010	YOR244W	C00323
C00010	YOR244W	C00406
C00010	YOR244W	C00512
C00010	YOR244W	C00527
C00010	YOR244W	C00582
C00010	YOR244W	C03561
C00010	YOR244W	C05338
C00010	YOR317W	C00154
C00010	YOR317W	C05338
C00010	YOR317W	C05668
C00010	YOR317W	C06671
C00010	YOR317W	C07118
C00010	YOR317W	C09823
C00010	YOR317W	C14143
C00010	YOR317W	C16268
C00010	YOR317W	C16464
C00010	YOR377W	C00024
C00010	YOR377W	C00083
C00010	YOR377W	C00154
C00010	YOR377W	C00223
C00010	YOR377W	C00323
C00010	YOR377W	C00406
C00010	YOR377W	C00512
C00010	YOR377W	C00527
C00010	YOR377W	C00582
C00010	YOR377W	C03561
C00010	YOR377W	C05338
C00010	YPL001W	C00024
C00010	YPL001W	C00083
C00010	YPL001W	C00154
C00010	YPL001W	C00223
C00010	YPL001W	C00323
C00010	YPL001W	C00406
C00010	YPL001W	C00512
C00010	YPL001W	C00527
C00010	YPL001W	C00582
C00010	YPL001W	C03561
C00010	YPL001W	C05338
C00010	YPL017C	C00024
C00010	YPL017C	C00091
C00010	YPL017C	C00527
C00010	YPL028W	C00024
C00010	YPL028W	C00083
C00010	YPL028W	C00136
C00010	YPL028W	C00154
C00010	YPL028W	C00223
C00010	YPL028W	C00323
C00010	YPL028W	C00406
C00010	YPL028W	C00512
C00010	YPL028W	C00527
C00010	YPL028W	C00582
C00010	YPL028W	C03561
C00010	YPL028W	C05338
C00010	YPL072W	C15547
C00010	YPL086C	C00024
C00010	YPL086C	C00083
C00010	YPL086C	C00154
C00010	YPL086C	C00223
C00010	YPL086C	C00323
C00010	YPL086C	C00406
C00010	YPL086C	C00512
C00010	YPL086C	C00527
C00010	YPL086C	C00582
C00010	YPL086C	C03561
C00010	YPL086C	C05338
C00010	YPL231W	C00024
C00010	YPL231W	C00083
C00010	YPL231W	C00154
C00010	YPL231W	C00223
C00010	YPL231W	C00323
C00010	YPL231W	C00406
C00010	YPL231W	C00512
C00010	YPL231W	C00527
C00010	YPL231W	C00582
C00010	YPL231W	C03561
C00010	YPL231W	C05338
C00010	YPR001W	C00024
C00010	YPR001W	C00154
C00010	YPR006C	C00024
C00010	YPR127W	C00024
C00015	YAL023C	C00029
C00015	YAL023C	C00052
C00015	YAL023C	C00167
C00015	YAL023C	C02199
C00015	YAL038W	C00075
C00015	YBL082C	C00029
C00015	YBL082C	C00052
C00015	YBL082C	C00167
C00015	YBL082C	C02199
C00015	YBR001C	C00167
C00015	YBR001C	C01170
C00015	YBR023C	C00029
C00015	YBR023C	C00043
C00015	YBR023C	C00052
C00015	YBR023C	C00167
C00015	YBR023C	C02199
C00015	YBR038W	C00029
C00015	YBR038W	C00043
C00015	YBR038W	C00052
C00015	YBR038W	C00167
C00015	YBR038W	C02199
C00015	YBR070C	C00029
C00015	YBR070C	C00043
C00015	YBR070C	C00052
C00015	YBR070C	C00167
C00015	YBR070C	C02199
C00015	YBR110W	C00029
C00015	YBR110W	C00052
C00015	YBR110W	C00167
C00015	YBR110W	C02199
C00015	YBR126C	C00029
C00015	YBR126C	C00052
C00015	YBR126C	C00167
C00015	YBR126C	C02199
C00015	YBR229C	C00167
C00015	YBR229C	C01170
C00015	YBR299W	C00167
C00015	YBR299W	C01170
C00015	YDL037C	C00167
C00015	YDL037C	C01170
C00015	YDL093W	C00029
C00015	YDL093W	C00052
C00015	YDL093W	C00167
C00015	YDL093W	C02199
C00015	YDL095W	C00029
C00015	YDL095W	C00052
C00015	YDL095W	C00167
C00015	YDL095W	C02199
C00015	YDR001C	C00167
C00015	YDR001C	C01170
C00015	YDR074W	C00029
C00015	YDR074W	C00052
C00015	YDR074W	C00167
C00015	YDR074W	C02199
C00015	YDR261C	C00167
C00015	YDR261C	C01170
C00015	YDR307W	C00029
C00015	YDR307W	C00052
C00015	YDR307W	C00167
C00015	YDR307W	C02199
C00015	YEL011W	C00029
C00015	YEL011W	C00052
C00015	YEL011W	C00167
C00015	YEL011W	C02199
C00015	YER005W	C00075
C00015	YER005W	C00105
C00015	YER070W	C01346
C00015	YFR015C	C00029
C00015	YFR015C	C00052
C00015	YFR015C	C00167
C00015	YFR015C	C02199
C00015	YGL022W	C00029
C00015	YGL022W	C00052
C00015	YGL022W	C00167
C00015	YGL022W	C02199
C00015	YGL027C	C00167
C00015	YGL027C	C01170
C00015	YGL038C	C00029
C00015	YGL038C	C00052
C00015	YGL038C	C00167
C00015	YGL038C	C02199
C00015	YGL047W	C00029
C00015	YGL047W	C00043
C00015	YGL047W	C00052
C00015	YGL047W	C00167
C00015	YGL047W	C02199
C00015	YGL065C	C00029
C00015	YGL065C	C00052
C00015	YGL065C	C00167
C00015	YGL065C	C02199
C00015	YGL156W	C00167
C00015	YGL156W	C01170
C00015	YGR032W	C00029
C00015	YGR032W	C00052
C00015	YGR032W	C00167
C00015	YGR032W	C02199
C00015	YGR180C	C01346
C00015	YGR199W	C00029
C00015	YGR199W	C00052
C00015	YGR199W	C00167
C00015	YGR199W	C02199
C00015	YGR240C	C00075
C00015	YGR282C	C00167
C00015	YGR282C	C01170
C00015	YGR287C	C00167
C00015	YGR287C	C01170
C00015	YGR292W	C00167
C00015	YGR292W	C01170
C00015	YIL066C	C01346
C00015	YIL099W	C00167
C00015	YIL099W	C01170
C00015	YIL162W	C00167
C00015	YIL162W	C01170
C00015	YIL172C	C00167
C00015	YIL172C	C01170
C00015	YIR019C	C00167
C00015	YIR019C	C01170
C00015	YJL026W	C01346
C00015	YJL216C	C00167
C00015	YJL216C	C01170
C00015	YJL221C	C00167
C00015	YJL221C	C01170
C00015	YJR131W	C00167
C00015	YJR131W	C01170
C00015	YJR143C	C00029
C00015	YJR143C	C00052
C00015	YJR143C	C00167
C00015	YJR143C	C02199
C00015	YJR153W	C00167
C00015	YJR153W	C01170
C00015	YKL024C	C00105
C00015	YKL046C	C00167
C00015	YKL046C	C01170
C00015	YKL067W	C00075
C00015	YLR189C	C00029
C00015	YLR189C	C00052
C00015	YLR189C	C00167
C00015	YLR189C	C02199
C00015	YLR258W	C00029
C00015	YLR258W	C00052
C00015	YLR258W	C00167
C00015	YLR258W	C02199
C00015	YLR286C	C00167
C00015	YLR286C	C01170
C00015	YLR300W	C00167
C00015	YLR300W	C01170
C00015	YLR342W	C00029
C00015	YLR342W	C00052
C00015	YLR342W	C00167
C00015	YLR342W	C02199
C00015	YML100W	C00029
C00015	YML100W	C00052
C00015	YML100W	C00167
C00015	YML100W	C02199
C00015	YMR205C	C00075
C00015	YMR238W	C00167
C00015	YMR238W	C01170
C00015	YMR261C	C00029
C00015	YMR261C	C00052
C00015	YMR261C	C00167
C00015	YMR261C	C02199
C00015	YMR306W	C00029
C00015	YMR306W	C00052
C00015	YMR306W	C00167
C00015	YMR306W	C02199
C00015	YNL192W	C00029
C00015	YNL192W	C00043
C00015	YNL192W	C00052
C00015	YNL192W	C00167
C00015	YNL192W	C02199
C00015	YNR012W	C00075
C00015	YNR030W	C00029
C00015	YNR030W	C00052
C00015	YNR030W	C00167
C00015	YNR030W	C02199
C00015	YOL157C	C00167
C00015	YOL157C	C01170
C00015	YOR190W	C00167
C00015	YOR190W	C01170
C00015	YOR321W	C00029
C00015	YOR321W	C00052
C00015	YOR321W	C00167
C00015	YOR321W	C02199
C00015	YOR347C	C00075
C00015	YPL175W	C00029
C00015	YPL175W	C00043
C00015	YPL175W	C00052
C00015	YPL175W	C00167
C00015	YPL175W	C02199
C00015	YPL227C	C00029
C00015	YPL227C	C00052
C00015	YPL227C	C00167
C00015	YPL227C	C02199
C00015	YPR026W	C00167
C00015	YPR026W	C01170
C00015	YPR160W	C00029
C00015	YPR160W	C00052
C00015	YPR160W	C00167
C00015	YPR160W	C02199
C00015	YPR183W	C00029
C00015	YPR183W	C00052
C00015	YPR183W	C00167
C00015	YPR183W	C02199
C00015	YPR184W	C00029
C00015	YPR184W	C00052
C00015	YPR184W	C00167
C00015	YPR184W	C01170
C00015	YPR184W	C02199
C00016	YBR084W	C01352
C00016	YDL045C	C00061
C00016	YER023W	C01352
C00016	YGL125W	C01352
C00016	YGL205W	C01352
C00016	YGR204W	C01352
C00016	YHR037W	C01352
C00016	YIL049W	C01352
C00016	YIL155C	C01352
C00016	YIR034C	C01352
C00016	YKR080W	C01352
C00016	YLR142W	C01352
C00016	YNR050C	C01352
C00016	YOR236W	C01352
C00016	YOR356W	C01352
C00018	YBR035C	C00627
C00018	YBR035C	C00647
C00018	YNR027W	C00250
C00019	YBR133C	C00021
C00019	YBR133C	C00828
C00019	YBR133C	C01152
C00019	YBR133C	C01575
C00019	YBR133C	C02059
C00019	YBR133C	C02765
C00019	YBR133C	C04831
C00019	YBR133C	C05302
C00019	YBR133C	C05802
C00019	YBR133C	C05804
C00019	YBR133C	C05812
C00019	YBR133C	C05814
C00019	YBR133C	C06199
C00019	YBR133C	C08526
C00019	YBR133C	C09581
C00019	YBR133C	C09694
C00019	YBR133C	C10462
C00019	YBR133C	C11911
C00019	YBR133C	C15877
C00019	YBR133C	C15881
C00019	YBR133C	C15883
C00019	YBR133C	C15886
C00019	YBR133C	C15888
C00019	YBR133C	C15900
C00019	YBR236C	C00021
C00019	YBR236C	C00828
C00019	YBR236C	C01152
C00019	YBR236C	C01575
C00019	YBR236C	C02059
C00019	YBR236C	C02765
C00019	YBR236C	C04831
C00019	YBR236C	C05302
C00019	YBR236C	C05802
C00019	YBR236C	C05804
C00019	YBR236C	C05812
C00019	YBR236C	C05814
[truncated: 12,594 more rows]
