# Supplementary material for: Prediction of Substrate-Enzyme-Product Interaction Based on Molecular Descriptors and Physicochemical Properties
Source: Biomed Res Int. 2013 Dec 22;2013:674215. doi: 10.1155/2013/674215 (PMC3881445; doi:10.1155/2013/674215)
Supplement: Supplementary file 1 — Supplementary Material 1： The ID of 1326 compounds and 939 enzymes of metabolic pathway in Kegg database. Supplementary Material 2：14,592 networking triads of substrate-enzyme-product. Supplementary Material 3: 729,600 non-networking triads of substrate-enzyme-product. Supplementary Material 4: Calculated value of molecular descriptors of 1326 compounds and the categories. Supplementary Material 5: The value of 132 physicochemical descriptors for 939 enzyme. Supplementary Material 6: The MaxRel and mRMR feature tables using mRMR method. [file 674215.f1.zip › 674215.f1/supplemental material III.csv]

729	600 non-networking triads of substrate-enzyme-product
Substrate	Enzyme	Product
C14787	YIL113W	C11939
C05301	YOR176W	C00705
C05947	YJL125C	C02376
C01269	YBR133C	C04453
C05947	YOL140W	C04677
C00026	YMR217W	C00279
C00003	YER015W	C14859
C00334	YDL122W	C12989
C16300	YJL216C	C00117
C02375	YAL062W	C12413
C13624	YCL017C	C00255
C05548	YOR061W	C07098
C04217	YNL247W	C16476
C00356	YML068W	C04454
C05768	YDR037W	C06427
C01344	YOR388C	C04322
C00954	YDR353W	C00279
C01983	YIL125W	C01260
C00124	YNL316C	C05695
C16311	YDR054C	C05640
C06670	YDR519W	C08539
C00519	YOR196C	C11429
C16476	YGR155W	C16448
C01300	YDR232W	C04036
C00376	YKL035W	C00673
C00399	YJL026W	C00407
C00517	YKL181W	C00671
C02739	YPL204W	C15969
C00490	YKL150W	C00110
C15587	YER168C	C14097
C15883	YBL039C	C01097
C03557	YER055C	C04525
C06756	YMR208W	C06314
C05791	YEL038W	C05818
C00555	YPL258C	C00447
C05635	YML016C	C03672
C04076	YMR001C	C00251
C02880	YDL095W	C13631
C16300	YBR218C	C00075
C04732	YKR084C	C05125
C00642	YNL009W	C06581
C00534	YLR304C	C05768
C05665	YDL004W	C15867
C15930	YDR454C	C05259
C03785	YML081C-A	C04831
C03912	YMR303C	C11148
C02235	YBR097W	C07093
C07715	YIL147C	C05947
C15792	YGR208W	C05270
C01598	YJL031C	C06315
C11519	YER015W	C10462
C00446	YOR184W	C05460
C05265	YBR117C	C05686
C05699	YGL191W	C14853
C00576	YDL182W	C05608
C02940	YOR388C	C01096
C14858	YHR043C	C00794
C02137	YPR145W	C06640
C00831	YOR274W	C00231
C00836	YDR268W	C13425
C00468	YBR127C	C03189
C01762	YDL236W	C07090
C07111	YMR323W	C00020
C14814	YER042W	C05695
C08590	YJL197W	C00668
C16145	YJR078W	C06548
C05691	YML126C	C01161
C00299	YGL017W	C00381
C01504	YJL187C	C00332
C05966	YOR202W	C00406
C14147	YJL153C	C06715
C02470	YMR120C	C07645
C01943	YJR121W	C06790
C00003	YMR271C	C09621
C06010	YPL001W	C08825
C02670	YLR189C	C00479
C00957	YER026C	C00751
C00042	YGL156W	C04874
C00280	YDR283C	C01832
C00127	YDR147W	C06329
C01344	YDR298C	C06189
C00235	YMR001C	C05841
C00881	YCR036W	C11422
C01041	YDR436W	C07096
C01059	YDR402C	C00233
C01344	YDR242W	C04751
C02097	YNL037C	C05635
C00299	YER055C	C13952
C06504	YDL064W	C05824
C11472	YDL022W	C01100
C15547	YJL101C	C16461
C02139	YPL111W	C14853
C07091	YKL085W	C00255
C03090	YOR341W	C14810
C06017	YDR001C	C06731
C00025	YGR188C	C03680
C04751	YNR043W	C05711
C13631	YDL238C	C00082
C02940	YER089C	C00155
C11916	YNR031C	C06711
C05600	YHR025W	C09880
C00673	YNR058W	C06504
C01143	YKL026C	C01304
C05698	YLR433C	C14850
C07095	YKL139W	C00627
C06329	YMR006C	C04181
C02110	YGR287C	C01177
C00061	YPR066W	C00149
C04484	YGR010W	C04525
C14786	YBL076C	C15793
C05985	YPR190C	C16202
C06244	YKR084C	C00033
C03672	YDR283C	C02532
C00881	YGR267C	C16417
C16356	YDR457W	C00123
C05528	YKR080W	C14147
C04181	YLR304C	C07720
C03918	YOL016C	C00645
C04324	YOR386W	C01179
C06899	YPR073C	C16267
C00075	YPL234C	C11908
C00083	YLR113W	C04115
C05627	YIL009W	C05411
C06329	YCL017C	C15802
C07646	YNL186W	C03028
C00588	YHL012W	C00295
C00415	YPL028W	C00470
C00204	YPL001W	C02532
C01171	YML057W	C06315
C05158	YDL080C	C00630
C05404	YOR323C	C06174
C05382	YMR300C	C01987
C04640	YOL115W	C15992
C11939	YJR139C	C14180
C04044	YNL037C	C12986
C08526	YPL209C	C01268
C02220	YMR169C	C01063
C16303	YLR142W	C03341
C00617	YPL234C	C00147
C00008	YGL130W	C05313
C00829	YDR232W	C00086
C04479	YCR073C	C01100
C07208	YDL159W	C01300
C00047	YOR109W	C03582
C00135	YPL091W	C00257
C00619	YDR111C	C06790
C16312	YIL155C	C02633
C00606	YPL069C	C00380
C05668	YKL008C	C15803
C16286	YPL017C	C04831
C15586	YKR069W	C15527
C00353	YHL032C	C13624
C00751	YER055C	C00565
C03595	YDR054C	C01289
C00230	YJR010W	C00032
C00385	YNR050C	C01120
C01161	YNR008W	C01037
C00065	YHL010C	C00224
C05701	YDR530C	C02666
C05263	YLR027C	C13631
C16156	YEL055C	C00986
C00081	YKL126W	C00058
C14147	YBR001C	C05273
C16075	YLR142W	C00141
C01530	YML016C	C03189
C04133	YGL009C	C10443
C05338	YOR341W	C07100
C00170	YDR523C	C12673
C05659	YMR083W	C07091
C06757	YIL049W	C14829
C08537	YMR323W	C02139
C00033	YPL096W	C04144
C15700	YNL104C	C00546
C01929	YOR317W	C01246
C02280	YHR216W	C00606
C01419	YOR116C	C00522
C06641	YML082W	C02137
C06678	YIL113W	C04677
C05335	YJR103W	C00096
C05662	YFR033C	C01345
C01260	YGR292W	C05580
C02909	YLR017W	C00510
C00010	YDR283C	C01259
C08825	YDR178W	C16283
C01092	YOL115W	C12214
C13747	YNL186W	C00073
C06554	YEL046C	C04831
C14859	YOR190W	C06650
C05830	YOR168W	C00132
C00650	YDL024C	C01788
C01920	YMR022W	C06124
C06719	YIL125W	C16153
C00191	YLR449W	C04442
C00738	YLR318W	C09694
C01302	YKL106W	C03219
C04352	YBR221C	C04575
C01987	YER023W	C11432
C01595	YIL010W	C00469
C03979	YML070W	C01697
C05809	YKR069W	C00712
C00623	YMR306W	C11355
C00255	YER043C	C14082
C16144	YOR184W	C06316
C04823	YOR184W	C00180
C06649	YCR069W	C00136
C07649	YOR347C	C15801
C06599	YJL200C	C16281
C01575	YCL017C	C05827
C04442	YMR113W	C16448
C15986	YDR148C	C00033
C03069	YMR306W	C00103
C14829	YDR236C	C00446
C05695	YDR519W	C03981
C00212	YDL236W	C00506
C00054	YOR270C	C14815
C05828	YOL086C	C12138
C03460	YKL029C	C00376
C00223	YER144C	C06195
C00085	YMR220W	C04144
C00101	YER133W	C00191
C16443	YJR121W	C03150
C00671	YCL030C	C06719
C15801	YER069W	C01419
C00106	YLR450W	C04144
C04623	YGR248W	C05578
C00286	YHR183W	C01024
C00231	YGL191W	C00063
C04896	YLR306W	C05700
C05604	YGL148W	C15892
C09844	YOR005C	C15900
C04322	YGL125W	C07729
C00332	YJL052W	C16263
C00116	YLR157C	C04691
C04144	YHL012W	C00794
C00412	YLL001W	C01920
C06427	YFR047C	C00106
C04484	YDR523C	C00037
C14115	YBL064C	C01051
C03087	YHR216W	C01031
C01832	YNL106C	C03063
C15992	YIL172C	C01499
C03263	YFL017C	C04051
C04051	YOL013C	C12989
C16417	YGR020C	C00479
C00378	YLR058C	C00035
C06105	YDL205C	C01902
C01943	YDR120C	C14143
C04623	YMR156C	C00942
C00141	YPL091W	C00248
C00448	YMR008C	C08725
C01944	YLR089C	C09815
C16470	YLL051C	C05966
C01530	YDL090C	C05460
C01494	YLR231C	C11457
C00479	YAR071W	C00250
C16312	YDR530C	C05276
C16496	YPL001W	C06754
C07086	YML082W	C06002
C15801	YLR355C	C03351
C00531	YJL125C	C16186
C00319	YDL055C	C03824
C00363	YCL040W	C06056
C00665	YGR244C	C08725
C00120	YAR015W	C05946
C16406	YNL241C	C02798
C00008	YKR002W	C14853
C15776	YOR208W	C01962
C00621	YOR360C	C01454
C01083	YJR130C	C00836
C00110	YHL012W	C00299
C05411	YAL038W	C00360
C01037	YLR307W	C06057
C00216	YKL161C	C12623
C11940	YML120C	C00310
C07535	YOR377W	C09821
C14859	YBL067C	C05698
C14098	YGL063W	C06124
C00199	YNL009W	C05809
C06377	YPL231W	C14101
C00748	YDR127W	C03506
C05695	YGR180C	C16272
C05272	YDR242W	C03035
C06576	YDR477W	C00052
C03862	YLR245C	C02291
C06638	YPL028W	C03267
C16201	YJR121W	C09629
C06055	YPL117C	C01962
C05460	YHL007C	C02637
C08276	YGR183C	C00178
C14148	YJR143C	C16145
C00134	YDR047W	C06017
C00363	YAL054C	C04257
C14082	YDL090C	C00468
C05831	YPR068C	C00163
C00794	YOR074C	C13629
C04677	YMR108W	C15925
C01697	YOL061W	C00475
C05141	YGL040C	C05200
C05527	YDR009W	C16392
C00312	YNL202W	C02835
C00725	YBR111C	C07720
C09821	YOR388C	C00005
C15870	YNR028W	C15801
C01984	YML068W	C03242
C16470	YGR180C	C16251
C00655	YPR127W	C00672
C04706	YPL234C	C14771
C06790	YIR027C	C00078
C04554	YCL043C	C05604
C05302	YHR216W	C00005
C01168	YCL040W	C00247
C00093	YJR009C	C05411
C05300	YIL066C	C05235
C01272	YOL055C	C04294
C04076	Q0110	C15867
C09822	YDL028C	C11356
C00049	YNL088W	C14778
C01598	YOR321W	C00041
C14150	YDL159W	C00242
C12095	YGL008C	C04807
C00632	YNR003C	C04742
C16464	YMR120C	C01246
C01454	YLR234W	C07213
C14770	YOR339C	C15877
C05345	YDR092W	C14813
C00203	YJL155C	C01788
C05444	YPR033C	C04895
C15803	YPL206C	C02137
C05839	YOL140W	C06641
C02934	YKL067W	C01101
C01272	YMR189W	C00221
C04051	YCL004W	C00603
C00568	YNL052W	C00673
C00353	YOR184W	C14150
C00224	YHR189W	C00119
C00506	YHL007C	C00490
C08544	YOL096C	C16356
C04225	YER068W	C00668
C06195	YPL167C	C01504
C03175	YGR171C	C00216
C12673	YHL012W	C03925
C04537	YCR073C	C00492
C00149	YLR028C	C05598
C03373	YGR244C	C14778
C00460	YBR126C	C00327
C00189	YMR217W	C00346
C00430	YJL148W	C04281
C00242	YKL126W	C00438
C16204	YGR183C	C05659
C01289	YER026C	C05297
C05272	YDR092W	C05135
C00689	YBR117C	C14811
C05828	YML075C	C06195
C05925	YOR005C	C16145
C00356	YER003C	C02469
C06426	YLR142W	C14829
C00596	YLR377C	C01134
C01694	YAL023C	C00399
C03341	YDR236C	C07097
C14899	YDR236C	C07720
C01083	YGR088W	C16153
C00954	YHR039C-A	C00576
C14853	YPR035W	C16201
C05291	YBR208C	C02235
C16156	YIL155C	C00055
C06044	YNL241C	C05297
C06593	YDR440W	C14082
C00295	YDL021W	C14147
C00652	YGL141W	C05274
C14857	YAL054C	C11384
C05582	YHR201C	C04043
C05601	YLR303W	C00415
C02666	YOR330C	C09844
C00169	YIL116W	C06111
C04324	YER129W	C03087
C11384	YDL074C	C05811
C00093	YJL046W	C00430
C00280	YLR286C	C11941
C12096	YPR033C	C04691
C06044	YHR183W	C05844
C01180	YLL036C	C12204
C01825	YDL205C	C06203
C00463	YJL153C	C03785
C00341	YMR108W	C01035
C11924	YGR124W	C03082
C00458	YER052C	C00407
C00365	YMR277W	C01024
C07732	YCR024C	C00446
C00230	YML126C	C02946
C03063	YPR001W	C00655
C00109	YOR040W	C16209
C00379	YPR020W	C00232
C14820	YJR153W	C00712
C00254	YDR377W	C02139
C01041	YKR097W	C00668
C00532	YCR066W	C00170
C04479	YDR441C	C13629
C07496	YGL125W	C02814
C03479	YGL055W	C06032
C00158	YAL023C	C04691
C00041	YMR105C	C03765
C09666	YIR032C	C01416
C00302	YDR487C	C09823
C00519	YIL116W	C01165
C00882	YCL040W	C00166
C07094	YER091C	C07838
C03028	YDR408C	C06316
C00407	YGL248W	C00900
C11939	YDR304C	C00334
C00460	YPL064C	C05548
C02029	YLR089C	C00097
C15556	YFR047C	C00630
C14769	YPL179W	C07086
C00483	YGR040W	C04089
C00249	YOL126C	C05276
C05335	YMR006C	C06536
C05813	YER183C	C00532
C01801	YLR286C	C05634
C16145	YFR010W	C03170
C15794	YHR179W	C07095
C14143	YDR177W	C01767
C00156	YLR295C	C05831
C16145	YLR307W	C01598
C00329	YIL048W	C16391
C04623	YOR274W	C04916
C00630	YMR271C	C11148
C02137	YIL162W	C02637
C00568	YEL055C	C01944
C03344	YDL150W	C05298
C12096	YDL101C	C05460
C05812	YMR281W	C07728
C07095	YJL166W	C07715
C01412	YNL330C	C05413
C01289	YFL036W	C11348
C04294	YNL192W	C04089
C02370	YHR137W	C04644
C11508	YMR300C	C04479
C03351	YLR044C	C04257
C00460	YBL052C	C15802
C00074	YNL277W	C06580
C06046	YEL038W	C05814
C00531	YLR245C	C03221
C07213	YPR190C	C02124
C04322	YDR059C	C00042
C03240	YGR282C	C03838
C05830	YBR145W	C06032
C07720	YEL038W	C00511
C02291	YGR192C	C07215
C04043	YPL175W	C00593
C00525	YEL021W	C01152
C05269	YDL182W	C05691
C06203	YEL011W	C05662
C00178	YAR019C	C06102
C14857	YOR332W	C04582
C05300	YDR037W	C00826
C03758	YDR376W	C00183
C13634	YJR130C	C05412
C01595	YJR036C	C05773
C14098	YLR432W	C00588
C04573	YLR231C	C06189
C09821	YBR118W	C14143
C06754	YOR109W	C01289
C04831	YBR035C	C07111
C07093	YER100W	C11427
C00491	YAL054C	C00645
C14778	YDL022W	C14820
C05809	YGL037C	C07838
C00630	YMR104C	C12623
C03150	YGR240C	C01118
C00075	YDR173C	C09581
C07836	YDR287W	C15882
C06462	YDR390C	C05313
C00415	YOR190W	C00090
C00144	YOR386W	C00669
C02083	YNL141W	C06603
C06579	YLR133W	C00058
C08604	YDR196C	C01115
C02965	YHR063C	C15794
C05270	YOR142W	C00099
C00415	YGL038C	C05839
C01081	YHR037W	C03263
C03479	YJL031C	C07094
C01412	YDL102W	C06579
C05460	YPR010C	C00058
C03657	YDR177W	C00092
C12673	YJR063W	C07101
C00065	YAL062W	C05414
C00166	YDR354W	C04225
C07102	YHR001W-A	C01847
C01659	YPL061W	C02124
C03319	YBR117C	C15786
C08300	YDR529C	C00169
C16238	YDR530C	C00155
C05811	YLR342W	C10945
C06670	YIL162W	C00025
C00346	YBR221C	C04272
C12371	YDR045C	C02631
C00134	YDL040C	C03203
C15791	YNL141W	C05411
C14556	YBL068W	C06369
C00385	YEL058W	C04454
C00371	YBR035C	C04411
C07114	YCL064C	C15547
C00951	YBR082C	C00016
C01983	YER098W	C00207
C05695	YLR303W	C04537
C01304	YOR143C	C00606
C01107	YPR190C	C15857
C00571	YJL052W	C14091
C01120	YCL004W	C05815
C00035	YIL113W	C15786
C09666	YER065C	C05291
C14098	YIL145C	C00555
C06017	YBL076C	C00231
C00534	YDL100C	C00112
C00487	YMR054W	C00526
C06633	YNL130C	C14150
C07084	YBR278W	C16306
C16238	YKL029C	C04115
C01120	YDL230W	C00346
C00818	YPL001W	C08276
C05297	YBR023C	C05445
C09684	YCR005C	C05301
C00275	YHR020W	C05338
C05265	YMR105C	C05598
C00831	YLR058C	C07095
C05412	YNL154C	C00079
C08300	YER062C	C02470
C13632	YNL163C	C00065
C00531	YPL017C	C06801
C02463	YDR294C	C03752
C09848	YHR019C	C00440
C02630	YEL042W	C06204
C00361	YOR231W	C05313
C00440	YBR092C	C00249
C00459	YGL001C	C14858
C11508	YLR158C	C03752
C05730	YGR204W	C03170
C04874	YBR082C	C06174
C00100	YLR180W	C03232
C01013	YMR162C	C00673
C13378	YOR005C	C01236
C00491	YNR058W	C00301
C00390	YGL187C	C00166
C00596	YKR002W	C04479
C00525	YGL202W	C16157
C01530	YER087W	C06427
C05111	YER100W	C00364
C00216	YGL125W	C15793
C00794	YKL067W	C05662
C05653	YLR089C	C11519
C11472	YOL065C	C13633
C05527	YOR136W	C11398
C00219	YLR231C	C05811
C00586	YGR175C	C01284
C00100	YNR033W	C00033
C03479	YLR058C	C15787
C06671	YJR016C	C05291
C08604	YOR381W	C00931
C15969	YBR276C	C01104
C06017	YHR189W	C03735
C01134	YOR377W	C00121
C00137	YFL053W	C05598
C06199	YCL030C	C05581
C01079	YOR184W	C00668
C04677	YGR287C	C04824
C00623	YAL026C	C05947
C09666	YGL001C	C04181
C05300	YPL096W	C09812
C12095	YNL117W	C02124
C08620	YJL088W	C06715
C00511	YDR377W	C08825
C05635	YML100W	C01516
C06576	YOR330C	C05345
C01149	YMR293C	C00141
C02249	YEL042W	C00108
C06010	YNR012W	C06677
C06104	YOR231W	C03925
C01189	YBR092C	C03765
C01697	YKL184W	C01189
C12989	YER183C	C07734
C00328	YBR295W	C14556
C04582	YOR335C	C07728
C01134	YHR074W	C00078
C03351	YBL057C	C05985
C01516	YHR190W	C05921
C00672	YGR199W	C07446
C00334	YPR110C	C00577
C00487	YPL214C	C06868
C09821	YJL095W	C00242
C14769	YGL012W	C15900
C04691	YER098W	C00328
C01832	YOR375C	C00122
C00307	Q0110	C02083
C05527	YJR131W	C02273
C15892	YBR092C	C00437
C06099	YMR108W	C00829
C00054	YLR158C	C00449
C00099	YKL210W	C04807
C05811	YHR106W	C00337
C06575	YBL068W	C01192
C16416	YNL262W	C04582
C00526	YOR278W	C01115
C05296	YGR061C	C14115
C00532	YGL065C	C16286
C00212	YDL078C	C00333
C04652	YDL168W	C03221
C07114	YOR339C	C00153
C02505	YPL258C	C02336
C01943	YPR110C	C00311
C14815	YPL167C	C15798
C04390	YFL045C	C05662
C00262	YEL051W	C02411
C14826	YPR066W	C07083
C02946	YER100W	C03063
C02400	YMR304W	C00857
C00035	YDR111C	C06899
C01788	YBR039W	C00041
C00323	YOR351C	C02378
C02814	YPL160W	C14850
C05985	YER052C	C01983
C14828	YGR036C	C00223
C00576	YDL238C	C08825
C02370	YML120C	C15881
C01079	YKL060C	C02083
C00120	YML074C	C08814
C03373	YLL036C	C02727
C00415	YLR328W	C00133
C04044	YDR059C	C00621
C04353	YIL048W	C02110
C01416	YCR069W	C00025
C05952	YDR487C	C07643
C00455	YPL236C	C00447
C06104	YLR240W	C04454
C07645	YOR393W	C16162
C00479	YIL147C	C14082
C14089	YGR267C	C00341
C00582	YER069W	C15790
C00399	YOL096C	C00362
C05778	YLR447C	C05440
C00437	YHL012W	C12096
C15556	YPL111W	C04188
C05686	YIR034C	C16298
C00154	YFR014C	C00378
C02029	YIL009W	C02946
C03460	YER081W	C01185
C00026	YGR010W	C00067
C09665	YML106W	C00068
C03090	YMR205C	C00472
C16504	YGR012W	C12096
C15793	YCL050C	C00652
C00842	YGR254W	C03794
C00123	YHR144C	C00645
C07112	YDR304C	C04324
C00020	YDL093W	C13634
C06719	YHR174W	C00327
C05627	YPL203W	C11088
C00084	YER151C	C06098
C05578	YPL001W	C00583
C16465	YLR318W	C00047
C01724	YPL175W	C04352
C15799	YBR115C	C06329
C14812	YDR158W	C00381
C05827	YOR095C	C05841
C13629	YDR242W	C00493
C02576	Q0070	C00579
C09823	YHR215W	C02965
C00073	YKL060C	C14116
C04409	YBR058C	C03175
C05860	YDR453C	C00579
C00407	YBR006W	C00133
C00052	YKL161C	C00363
C05802	YDR321W	C00412
C05815	YJL167W	C06712
C03765	YGR254W	C00079
C04294	YHR068W	C00407
C03925	YKL026C	C15801
C15803	YLR382C	C02670
C01171	YLR070C	C16440
C00065	YIR034C	C05791
C00109	YBL057C	C06579
C03360	YOR119C	C03917
C00169	YPL271W	C00158
C02835	YCL030C	C04556
C14769	YDL131W	C11429
C00077	YGL040C	C00025
C04324	YDR270W	C01161
C11907	YOL016C	C01010
C07092	YFR055W	C00022
C00469	YLR258W	C11383
C00301	YNL154C	C11713
C00212	YGL234W	C06756
C00144	YGR192C	C16496
C06576	YOR386W	C05433
C14858	YNR031C	C00062
C06813	YBR038W	C04352
C05921	YKL127W	C00672
C00526	YLR038C	C05265
C05635	YIL124W	C14768
C15650	YJL106W	C01102
C14180	YDL090C	C07095
C03794	YMR113W	C05966
C05412	YER125W	C01582
C12312	YLL001W	C06210
C11942	YLR328W	C06731
C05235	YHR020W	C14899
C11908	YFL036W	C00836
C07096	YJR159W	C12623
C03063	YKL086W	C01944
C02378	YIR032C	C14811
C01943	YJR130C	C16500
C00022	YPL069C	C16393
C04732	YKL104C	C15787
C00826	YER003C	C00053
C00082	YGL202W	C00360
C01582	YJR019C	C14771
C04537	YHR208W	C07644
C02249	YJL166W	C00483
C00245	YDL017W	C05839
C00353	YDL246C	C05921
C07727	YER070W	C01157
C01159	YHR026W	C00121
C00118	YDR039C	C00617
C04039	YDR523C	C11355
C16356	YHR026W	C07097
C12640	YMR323W	C01197
C03227	YDL131W	C00412
C00068	YGR199W	C03672
C01825	YGR287C	C01575
C00387	YIR037W	C00010
C00353	YOR065W	C16286
C00097	YIL005W	C03561
C14556	YDR531W	C12137
C00957	YGR087C	C12673
C01508	YER065C	C00158
C00078	Q0045	C06600
C05401	YJR019C	C00449
C05302	YIL099W	C04216
C01137	YNL135C	C05635
C04615	YJL187C	C04831
C03453	YDR523C	C00882
C06462	YGR019W	C14116
C04734	YIL043C	C00085
C05294	YDL028C	C07495
C05259	YBR274W	C00078
C07585	YPR190C	C06224
C02670	YNL102W	C00417
C11393	YBR276C	C11148
C06377	YOL157C	C00319
C11713	YLR100W	C08814
C01097	YBL015W	C00637
C02442	YIR029W	C00352
C16156	YOR074C	C00302
C04051	YHR201C	C00090
C00183	YBR149W	C00010
C16156	YKL060C	C01694
C00623	YOR005C	C00860
C00630	YDR376W	C16499
C00631	YOL097C	C02734
C02249	YDL066W	C04573
C13632	YML068W	C00424
C00531	YIR031C	C01929
C06677	YOR168W	C03453
C16406	YEL021W	C00266
C09694	YIL094C	C05670
C08526	YDL006W	C01063
C06593	YGR061C	C15790
C04409	YJL125C	C09822
C05111	YKL029C	C02633
C00132	YDR287W	C00197
C00555	YIL048W	C00441
C13629	YMR220W	C01143
C04002	YDR158W	C03595
C00381	YDL171C	C04435
C05337	YIL094C	C05276
C14825	Q0110	C11785
C00256	YPR033C	C11519
C00449	YDR454C	C00705
C08825	YDL024C	C00153
C11398	YNL117W	C01284
C15874	YOR190W	C00116
C00222	YPL117C	C00362
C14149	YBR127C	C00804
C00621	YPL096W	C02225
C05581	YLR328W	C13631
C04760	YHR018C	C00245
C00035	YJR104C	C06712
C00627	YBR038W	C05577
C05269	YLR038C	C06174
C00163	YBR011C	C00460
C02372	YJL102W	C07086
C04895	YOR386W	C00189
C05235	YBR020W	C05921
C01268	YBR125C	C01454
C03012	YLL001W	C02633
C07836	YPR145W	C00665
C00596	YML100W	C16153
C08539	YHR079C	C04691
C03170	YHR046C	C00111
C05598	YNL192W	C07585
C15606	YLR113W	C11150
C03672	YLR038C	C05730
C04076	YHR091C	C00750
C04322	YEL058W	C14781
C00170	YGR180C	C05809
C02090	YPL069C	C00376
C00956	YGL245W	C00590
C00672	YGL130W	C01189
C14786	YDR294C	C06650
C04468	YBR020W	C00186
C00506	YHR043C	C05300
C00084	YDL090C	C02220
C12205	YER100W	C11944
C00149	YDL108W	C15886
C14771	YLR089C	C04677
C05711	YNR019W	C00842
C01468	YDL074C	C03240
C00223	YDR173C	C05688
C15883	YFR015C	C05198
C02050	YBR133C	C03595
C14180	YOR116C	C06111
C00083	YLL019C	C06523
C01847	YGR175C	C00328
C05634	YMR083W	C03373
C00345	YER166W	C00596
C07092	YPR010C	C01582
C14147	YCR012W	C14781
C16443	YLL036C	C04644
C02937	YJL088W	C15925
C05291	YNL163C	C00081
C13632	YPR080W	C02170
C14769	YIR031C	C12204
C01595	YOL033W	C13632
C11150	YMR105C	C02759
C11940	YMR105C	C05608
C07446	YPL028W	C00259
C04823	YJL121C	C00041
C00603	YOR196C	C03479
C05548	YBR121C	C00534
C00492	YLR038C	C16477
C06638	YER069W	C04217
C02249	YMR170C	C15802
C01024	YDR287W	C00337
C04297	YFR033C	C01149
C05135	YOR196C	C06604
C15874	YDL182W	C05814
C00053	YKL016C	C00881
C06199	YNL241C	C05844
C07215	YOL011W	C06790
C06603	YER183C	C00674
C14852	YGL248W	C00042
C16303	YDR075W	C00668
C07715	YBR026C	C01192
C00794	YLR209C	C04442
C02937	YGL141W	C13425
C02937	YHL010C	C00224
C11508	YKL060C	C16156
C06224	YER061C	C00235
C12989	YPR035W	C00134
C11472	YGL009C	C02137
C15987	YLL018C	C05582
C00623	YPL072W	C08814
C04751	YGR287C	C04824
C05337	YBR039W	C01013
C04281	YHR044C	C00621
C00074	YNR043W	C16440
C05665	YAL038W	C06714
C14829	YJL026W	C00255
C06504	YMR293C	C00311
C00280	YHR019C	C02933
C08061	YOR196C	C02090
C00750	YMR013C	C04036
C14749	YOR347C	C04043
C00311	YDR272W	C00159
C05235	YMR145C	C00187
C04734	YGR177C	C02199
C06599	YHR190W	C04666
C01115	YBL099W	C00620
C00477	YPL031C	C02090
C02083	YOR187W	C00292
C12647	YDL078C	C00473
C07732	YIR037W	C00104
C00882	YGR007W	C01041
C16162	YDL159W	C06790
C02631	YBR018C	C05813
C15786	YGL156W	C06044
C15606	YML106W	C00361
C15802	YDR050C	C15651
C03569	YPR047W	C06575
C05290	YMR256C	C08650
C00137	YGR194C	C00068
C06010	YPR175W	C02247
C03087	YBR127C	C04051
C06576	YNL045W	C01168
C08539	YIL160C	C07394
C05433	YIR034C	C01251
C06102	YDR300C	C00712
C12312	YDL134C	C00048
C00154	YOL065C	C00468
C06756	YDR519W	C05946
C00582	YLR355C	C01412
C05198	YGR248W	C00333
C01289	YBR018C	C16283
C00671	YEL021W	C06606
C03595	YCL004W	C06201
C04554	YGL047W	C00519
C04752	YLR155C	C06057
C03925	YOL061W	C00527
C13629	YMR009W	C00083
C05267	YNL037C	C00712
C05812	YCR066W	C14769
C00186	YLR157C	C14770
C14116	YLR306W	C00120
C01984	YDR502C	C05239
C00105	YHR030C	C04760
C09880	YIL162W	C12138
C05440	YPL069C	C11555
C03344	YDR173C	C01260
C00655	YDR074W	C16500
C16406	YDL100C	C14829
C05539	YFL017C	C06711
C14097	YPL072W	C05839
C15547	YCR014C	C00637
C16462	YOR209C	C00286
C03722	YKL085W	C00418
C06523	YFR014C	C00100
C03063	YPL017C	C00101
C01177	YAL023C	C00894
C11062	YJR121W	C13425
C01920	YLR377C	C03175
C00409	YLR155C	C01101
C02235	YPL206C	C05432
C08825	YPR161C	C06714
C01384	YKL161C	C09704
C15776	YDR408C	C00224
C02166	YCR069W	C03082
C00387	YDL185W	C01236
C07090	YBR295W	C05831
C05421	YOL011W	C05539
C07118	YGR171C	C06648
C11383	YPL091W	C04824
C06561	YEL038W	C04760
C07645	YHL012W	C00818
C02097	YDL017W	C00118
C05642	YOR375C	C16461
C05921	YGR019W	C06578
C05198	YDL021W	C02504
C11940	YPL228W	C00183
C05272	YIL145C	C14851
C16186	YBR117C	C16267
C15700	YNL113W	C01115
C04537	YML086C	C05773
C14812	YDL102W	C06730
C05804	YIL155C	C05576
C12988	YFR033C	C00031
C13425	YJL187C	C16443
C00477	YPL234C	C14823
C06561	YLL036C	C01159
C00406	YDR093W	C00064
C04734	YPL234C	C00575
C08526	YLR359W	C00362
C06203	YOR171C	C07088
C01494	YLR245C	C03203
C00207	YLR195C	C00870
C16315	YCL030C	C16465
C00388	YMR006C	C16464
C06055	YEL046C	C00186
C00049	YBR278W	C06757
C06575	YNR034W	C00002
C09811	YDR452W	C05123
C04494	YKL060C	C11432
C00475	YOR341W	C11940
C05577	YFR030W	C06813
C07213	YGR010W	C05444
C16477	YDR256C	C02463
C01454	YNR032W	C00458
C05581	YHR074W	C04216
C03360	YGR256W	C00247
C00169	YGR267C	C05778
C04043	YIL139C	C00570
C06032	YDL246C	C14870
C00130	YGR124W	C09243
C00477	YGR204W	C01269
C01267	YDR173C	C06635
C00341	YDR001C	C00233
C07732	YPR001W	C05791
C03203	YOR142W	C04489
C12413	YOR231W	C00235
C03087	YPL069C	C00299
C04840	YNL135C	C07481
C05831	YGR188C	C16268
C02166	YOR190W	C01909
C15586	YML126C	C03589
C01051	YMR323W	C03360
C00135	YHR037W	C00483
C00137	YHR215W	C03785
C00135	YKL035W	C00249
C04217	YGR208W	C01606
C16391	YBR117C	C03492
C00957	YMR113W	C01077
C08639	YDR234W	C00455
C06637	YJL187C	C05412
C00671	YBR084W	C15786
C00329	YIL116W	C00018
C04734	YDR232W	C00606
C06723	YBL068W	C05787
C03287	YGR040W	C04525
C04216	YBL082C	C05830
C04807	YPR002W	C16464
C04297	YGL156W	C00655
C00221	YNL169C	C06174
C06099	YKR084C	C00311
C00363	YLR303W	C00512
C09723	YOL136C	C00365
C02336	YPR054W	C08300
C05815	YNL104C	C06580
C00371	YDR062W	C00189
C00104	YHL003C	C00101
C14823	YGL038C	C08604
C04896	YAR071W	C00645
C14899	YER042W	C00477
C06719	YMR293C	C07646
C03090	YIL043C	C15867
C00153	YKL126W	C04582
C04692	YDR158W	C01788
C02218	YNR033W	C00073
C00032	YDL103C	C15700
C04537	YGR262C	C05378
C00619	Q0110	C01251
C00576	YML100W	C05578
C05852	YOR323C	C13747
C01063	YBL076C	C12414
C03680	YBL057C	C06523
C11130	YIL147C	C06606
C04644	YPL262W	C05802
C03657	YJR017C	C06790
C03735	YMR113W	C02050
C00705	YMR300C	C16315
C00645	YGL065C	C00041
C05294	YKR098C	C01005
C05809	YOR005C	C04575
C15898	Q0130	C00224
C01304	YDL246C	C05548
C03351	YJL088W	C05440
C16488	YGR124W	C03557
C07086	YMR278W	C01268
C05860	YLR432W	C01189
C01054	YOR142W	C05700
C01346	YNL262W	C00530
C06427	YEL055C	C07092
C05698	YNR032W	C00472
C01120	YPR081C	C05839
C05766	YGL047W	C14839
C01171	YLR420W	C00099
C16202	YPR175W	C05600
C14839	YDR283C	C10462
C07888	YOR190W	C00248
C11908	YML106W	C01250
C01101	YDR050C	C00882
C04037	YPR183W	C05860
C11036	YHR068W	C04644
C00029	YMR300C	C14769
C00470	YJR109C	C05290
C09821	YOR388C	C11398
C02469	YGL191W	C15785
C06504	YNL071W	C00363
C01168	YJL052W	C06715
C05527	YHR215W	C01010
C06504	YAL062W	C08620
C00184	YJR073C	C06314
C07888	YGR286C	C00519
C11907	YDR390C	C00606
C01344	YGR020C	C00086
C03672	YHR068W	C09844
C02631	YMR303C	C16298
C04079	YIL043C	C01825
C03589	YOR251C	C00582
C00307	YPL262W	C00208
C00445	YJR109C	C00319
C05766	YIL078W	C06727
C00054	YGL040C	C02280
C03453	YDL085W	C06561
C12312	YGL022W	C04036
C00301	YDL040C	C02532
C09844	YBR019C	C03862
C01081	YNL267W	C03267
C00249	YPR047W	C05778
C03351	YJL130C	C16416
C00603	YMR300C	C00149
C00376	YIR026C	C12213
C16358	YOR005C	C16272
C01384	YFL033C	C00081
C05294	YBR265W	C15786
C01180	YGL148W	C00134
C15867	YMR256C	C00831
C00327	YJR148W	C11457
C00415	YGR040W	C01302
C00114	YCL018W	C04752
C02442	YHR063C	C03090
C04089	YDL024C	C15792
C05936	YJL166W	C05139
C01504	YOL140W	C00831
C05581	YNL113W	C00674
C06729	YHR144C	C00860
C08537	YGL065C	C14098
C03460	YNL009W	C00356
C06102	YEL051W	C05802
C00095	YML106W	C02372
C00361	YOR095C	C03150
C12215	YBR295W	C05460
C05444	YER168C	C06579
C00361	YOL059W	C00064
C00131	YHR051W	C01031
C04454	YDR173C	C14823
C00593	YPL061W	C00255
C00477	YCR053W	C03680
C16462	YNL037C	C06606
C02666	YKL181W	C01096
C07649	YKL067W	C00530
C00748	YGL248W	C06678
C01152	YGL063W	C00314
C04036	YNL207W	C02504
C05773	YPL072W	C11941
C04044	YIR037W	C16300
C11432	YLR449W	C00345
C00250	YOR171C	C07208
C01801	YLR058C	C00621
C01659	YGR234W	C00412
C00248	YNR001C	C03918
C16499	YNR001C	C04115
C13378	YHR208W	C00842
C04644	YER023W	C00156
C00900	YGL058W	C00235
C05813	YEL021W	C04376
C05338	YOR040W	C06604
C05440	YJL148W	C05925
C00181	YGR184C	C15787
C05831	YHR072W	C06640
C01832	YIL155C	C04431
C13634	YPL236C	C01097
C00979	YPL227C	C01788
C15888	YBR252W	C00031
C12204	YNR012W	C13952
C16162	YOR119C	C04044
C00506	YBR149W	C07447
C00636	YDL182W	C05695
C00596	YGR012W	C00415
C11916	YML074C	C16448
C02165	YDL190C	C01302
C05581	YIL048W	C02050
C02888	YDR441C	C05401
C01227	YGL167C	C00458
C11457	YDR019C	C00842
C01902	YLR359W	C02739
C06637	YHR025W	C00199
C14866	YPL111W	C05787
C16477	YHR091C	C11457
C00535	YEL024W	C14150
C04411	YBR097W	C15969
C01220	YDL201W	C00417
C11907	YCR014C	C00251
C01302	YLR164W	C05198
C00235	YPL036W	C00101
C01054	YBL013W	C15874
C00530	YDR452W	C00127
C01041	YOL065C	C00738
C11943	YDR518W	C12371
C12383	YEL051W	C01179
C03595	YAR035W	C05787
C15801	YOR288C	C02110
C07836	YEL027W	C05402
C05604	YJL052W	C01243
C00004	YHR019C	C07836
C06056	YGL156W	C14099
C05515	YLR303W	C03035
C04089	YLL001W	C15882
C01596	YBR244W	C15969
C00371	YDL188C	C05270
C05432	YLR299W	C01081
C14769	YNR058W	C03287
C00438	YCL018W	C15882
C06189	YHR189W	C16416
C06098	YBR133C	C00479
C08825	YJR017C	C07208
C06174	YAR018C	C01269
C00242	YNL262W	C01929
C07649	YGR171C	C12988
C04751	YOR360C	C06727
C03981	YIR034C	C07101
C15586	YOR040W	C04411
C08060	YNL088W	C00262
C00559	YLR142W	C14828
C16144	YDR158W	C05691
C06648	YGL130W	C01825
C05108	Q0080	C07094
C05852	YDL066W	C06635
C00331	YLR260W	C00121
C07112	YDR519W	C03672
C01346	YPL204W	C04831
C00354	YOR202W	C15770
C00475	YNR043W	C15651
C14820	YER068W	C05901
C01037	YIL043C	C08300
C11942	YIR029W	C00043
C05966	YLR318W	C00441
C07715	YOL096C	C00334
C01063	YAR018C	C05925
C16157	YJL164C	C07084
C01929	YMR208W	C01185
C00818	YHR068W	C16286
C04431	YMR108W	C07102
C05290	YDR127W	C11939
C06104	YGR124W	C15767
C00689	YMR169C	C03175
C04216	YHR216W	C04144
C02576	YER166W	C13747
C08830	YIL113W	C09621
C09823	YAR015W	C00294
C01508	YKL106W	C00378
C05642	YNL262W	C00472
C16145	YLR189C	C04079
C06554	YPL097W	C08061
C04089	YHL003C	C06711
C03035	Q0105	C01037
C03406	YIL111W	C14150
C02888	YMR006C	C12640
C00365	YNL135C	C05297
C06674	YBR029C	C00187
C04895	YPL160W	C15790
C00153	YDL103C	C03219
C00877	YGR287C	C15785
C00133	YPL096W	C00266
C05951	YPR161C	C03227
C09880	YGL012W	C13747
C02798	YOR332W	C05294
C01246	YOR317W	C05659
C07447	YFR025C	C02637
C07212	YCR066W	C14854
C00116	YHL007C	C05804
C00156	YML074C	C00311
C05653	YOR136W	C14149
C00440	YPL271W	C00111
C00248	YGR020C	C00123
C13425	YER098W	C01944
C01272	YGL047W	C01419
C03557	YBR001C	C12623
C05413	YGR184C	C06649
C07447	YLR304C	C00133
C00221	YOR360C	C00323
C03240	YOR241W	C00842
C06638	YGL026C	C15870
C06203	YIL116W	C00331
C01097	YKL132C	C11088
C00256	YIL116W	C01251
C00090	YIL020C	C00672
C00186	YNL277W	C14778
C02888	YMR296C	C01613
C06604	YCL018W	C11472
C00135	YHR042W	C01037
C00738	YHR215W	C06244
C00530	YFR047C	C15799
C01054	YIL066C	C00418
C04144	YDL006W	C04441
C01595	YIL124W	C01227
C00636	YNL277W	C09581
C00280	YJL088W	C00337
C08060	YJL026W	C01102
C00033	YHL007C	C06576
C13952	YOR119C	C06575
C14815	YML086C	C12214
C05413	YER166W	C00870
C06649	YHR208W	C02059
C01346	YNR028W	C03219
C00266	YDL131W	C09880
C16156	YNL248C	C05576
C12384	YDR307W	C11398
C14150	YGL058W	C15801
C08604	YER073W	C02700
C00512	YMR238W	C01962
C00617	YDR354W	C04188
C15547	YDR454C	C00565
C13425	YPL031C	C00158
C16300	YJL216C	C08300
C00082	YDR481C	C00606
C14826	YJR131W	C09844
C02637	YBR218C	C05640
C00617	YBL016W	C01832
C16162	YDL080C	C03170
C00016	YER133W	C08537
C01269	YPL017C	C04494
C06204	YPR180W	C09665
C06199	YOR136W	C00224
C07727	YLR174W	C03012
C03360	YCR073W-A	C00805
C05672	YBR295W	C00986
C07118	YDR054C	C00219
C06801	YGR123C	C04751
C01189	YDR001C	C05692
C13629	YGR040W	C16162
C07490	YAL012W	C00333
C00499	YKR069W	C06674
C06002	YBL067C	C00633
C01096	YMR323W	C04628
C07732	YLR038C	C14866
C11555	YMR022W	C01412
C00095	YHR044C	C00568
C04556	YBR046C	C05338
C16204	YMR120C	C03752
C08537	YHR026W	C01260
C15785	YLR306W	C12137
C11150	YDR377W	C00459
C00095	YMR127C	C00275
C05653	YGR248W	C07646
C00601	YNL071W	C02124
C16263	YPL096W	C00655
C05768	YIL160C	C00328
C14768	YLR438W	C09821
C09821	YDL033C	C00212
C00275	YGR199W	C08276
C00522	YHR174W	C13952
C00242	YPR160W	C11355
C02880	YPR035W	C05812
C14039	YOR171C	C00236
C00295	YMR208W	C15987
C00314	YIR031C	C05642
C05608	YOR128C	C00212
C07103	YIL078W	C04494
C06606	YOR317W	C02470
C00207	YOL096C	C16235
C00630	YDL095W	C03219
C00216	YAR035W	C05433
C01697	YPR060C	C04435
C06649	YIL099W	C01847
C04079	YML008C	C05265
C00387	YBR218C	C06046
C05402	YER089C	C12384
C03735	YOR332W	C05111
C05831	YMR009W	C00381
C00472	YJR024C	C14143
C00836	YGL008C	C12673
C05698	YLR258W	C15800
C00232	YDL028C	C04484
C12837	YPR068C	C03918
C02029	YGR088W	C05512
C00120	YBR097W	C16464
C11924	YKL144C	C04039
C05831	YKL008C	C00186
C04324	YGR208W	C00103
C00412	YGR254W	C00942
C06650	YMR296C	C00620
C16392	YPL031C	C00108
C00740	YLR433C	C08639
C06727	YEL046C	C00352
C05578	YPR191W	C03175
C00221	YOR377W	C01467
C06002	YMR323W	C00186
C01230	YDR019C	C03087
C03598	YBR035C	C12214
C00885	YLR295C	C02139
C06813	YMR127C	C03319
C16416	YML081C-A	C00670
C14839	YFR019W	C00167
C03589	YOR332W	C05830
C00388	YDR035W	C07495
C04691	YOL136C	C03479
C00542	YNR016C	C00035
C02888	YML056C	C05379
C13378	YDR111C	C01243
C00670	YMR009W	C16315
C06017	YKL001C	C13634
C01920	YDL182W	C05296
C07481	YJL187C	C03546
C01516	YBR082C	C11941
C00085	YPR118W	C06755
C05412	YBR133C	C05921
C05768	YER070W	C00942
C06762	YDR039C	C09823
C09694	YHR068W	C07112
C05844	YPL017C	C00637
C14823	YDL140C	C16448
C05947	YEL027W	C00180
C12173	YBR208C	C03090
C05421	YNL192W	C06633
C05692	YDR256C	C03557
C07720	YLR146C	C11433
C15926	YKL150W	C00163
C00534	YDL236W	C06637
C00294	YKL104C	C05653
C00332	YCR066W	C15888
C00334	YOR303W	C10700
C03056	YGR180C	C03175
C02199	YPR002W	C06650
C00148	YGL130W	C16162
C07208	YMR054W	C12449
C15587	YJL106W	C06581
C16462	YJR159W	C16267
C16496	YDR092W	C12205
C16499	YDR408C	C12371
C04751	YLR028C	C14854
C04442	YJR143C	C01300
C01230	YDL037C	C00180
C07643	YBR029C	C00255
C00328	YGR199W	C00074
C04376	YJR139C	C07086
C12673	YBR278W	C15930
C05378	YGR088W	C01384
C11433	YDR045C	C04644
C06714	YBR001C	C00655
C03862	YPL064C	C00631
C15992	YKL016C	C00247
C05668	YGR060W	C11472
C06729	YDL101C	C00957
C01300	YMR304W	C00148
C00008	YKL024C	C09812
C03453	YHR179W	C00388
C00081	YEL027W	C00123
C08639	YBR160W	C14099
C00086	YGL130W	C11939
C07101	YLR395C	C00493
C05662	YKL085W	C01582
C00575	YEL021W	C14858
C00219	YGR202C	C11422
C00446	YMR296C	C05778
C08620	YER065C	C00091
C02631	YOR065W	C05011
C00042	YER087W	C09629
C00954	YGR010W	C06749
C04115	YIL116W	C04874
C00294	YDL085W	C07734
C09822	YAL026C	C00544
C00559	YKL008C	C01595
C05011	YDR062W	C14899
C15770	YLR239C	C06604
C00054	YPL160W	C01172
C05130	YPR074C	C04115
C12621	YJL101C	C00250
C07644	YBR249C	C02110
C02375	YOR274W	C05263
C04556	YGR188C	C00099
C01909	YMR250W	C02593
C02442	YJR063W	C12838
C00430	YML008C	C03069
C16499	YIR029W	C03492
C05141	YHR144C	C00900
C03056	YOL086C	C13378
C01659	YER170W	C06719
C00380	YPL228W	C05313
C01094	YEL011W	C00159
C01962	YDR173C	C01847
C00526	YJL200C	C05565
C05515	YJL045W	C00254
C08650	YDR075W	C00460
C00089	YNR057C	C00301
C06580	YOR335C	C02937
C08300	YML016C	C00446
C01260	YLR245C	C00104
C09694	YHR018C	C00642
C02630	YJR159W	C04079
C06604	YBL098W	C14826
C00571	YML081C-A	C00804
C02700	YJL101C	C01035
C00232	YKL132C	C05860
C06397	YML068W	C00257
C04494	YGR175C	C05412
C14091	YER070W	C08620
C07093	YER005W	C06719
C15785	YOL102C	C05993
C02232	YHR044C	C06638
C03087	YNL316C	C08620
C06580	YJL221C	C02166
C05860	YLR359W	C02165
C16496	YOR095C	C13378
C00319	YIL147C	C01943
C00191	YIR032C	C04002
C02940	YGR088W	C02059
C00531	YBL039C	C02505
C04327	YOR236W	C05270
C09699	YNL135C	C05418
C04330	YPL117C	C12988
C05275	YJR025C	C06057
C14749	YMR293C	C00095
C00455	YLL019C	C06630
C09684	YLR060W	C03063
C04823	YLR113W	C16298
C16356	YMR277W	C04409
C05401	YHR119W	C02220
C01020	YAL023C	C00794
C04121	YBR265W	C01010
C03227	YGL148W	C04916
C12673	YGR157W	C05382
C05430	YDR074W	C05337
C00794	YHL012W	C00417
C14840	YFL017C	C10138
C01344	YJR104C	C01192
C12647	YMR220W	C00022
C06648	YOR288C	C00082
C16281	YDL064W	C00043
C02220	YDR354W	C00199
C01236	YKL024C	C00900
C09699	YBR125C	C11940
C00632	YKL161C	C03672
C01575	YKL148C	C15787
C05300	YDR477W	C01063
C00381	YML100W	C01152
C00141	YOR143C	C01097
C13378	YOL102C	C00121
C03360	YCR053W	C00380
C03082	YNR027W	C04554
C05276	YMR293C	C12414
C04840	YDR074W	C00170
C06044	YPL212C	C06561
C15986	YGR133W	C05642
C04644	YJR032W	C05643
C00093	YLR109W	C05269
C12623	YGL125W	C07643
C03453	YDL066W	C04225
C13952	YER075C	C15986
C00387	YDR341C	C05272
C06603	YDR050C	C03925
C05859	YML081C-A	C00003
C11923	YMR304W	C05600
C00022	YHR091C	C09815
C11941	YPL116W	C02631
C07215	YFR033C	C02274
C08526	YGL256W	C15547
C07645	YIL048W	C03460
C07836	YLR231C	C14782
C11062	YML054C	C01259
C06729	YML016C	C05135
C00236	YDR376W	C14820
C01344	YMR006C	C06315
C00106	YNR012W	C01697
C15700	YHR068W	C08537
C11942	YGL008C	C00954
C15874	YBR117C	C14450
C12095	YMR246W	C05411
C15886	YDR062W	C00110
C04089	YLR027C	C05527
C04144	YLR195C	C04425
C14857	YHR001W-A	C01134
C05135	YDL090C	C00170
C02199	YGL037C	C13634
C04257	YOL061W	C00780
C07838	YOR386W	C00415
C01152	YFR053C	C05267
C07727	YOR303W	C04225
C14149	YDR019C	C00447
C00054	YGR094W	C05437
C14858	YPL204W	C00315
C04272	YHR025W	C01120
C04188	YPL234C	C00512
C04677	YBR229C	C11713
C00568	YNR003C	C13425
C05296	YPR176C	C00329
C00570	Q0130	C06195
C00669	YDL188C	C05516
C00430	YJR010W	C00155
C06633	YBR127C	C11150
C06637	YLR155C	C02191
C09811	YJR057W	C05813
C06055	YHR079C	C00412
C05841	YCL018W	C00582
C06749	YDR062W	C00956
C05700	YBR236C	C04146
C02059	YER129W	C00166
C14899	YBR126C	C11428
C01101	YPR020W	C11148
C05404	YDL185W	C05814
C12096	YBR058C	C04489
C00199	YDR234W	C07720
C06580	YGR155W	C00079
C12096	YBR133C	C00487
C05844	YOR196C	C16268
C04494	YIR032C	C00669
C00380	YML004C	C06210
C00504	YLR354C	C05401
C02232	YOR190W	C04582
C03492	YOR356W	C00526
C00052	YLR234W	C02469
C05512	YBR011C	C01909
C02083	YJR130C	C02280
C06899	YBR236C	C05259
C00805	YLR295C	C00064
C00346	YBR082C	C01606
C07394	YIL035C	C01346
C00207	YCR069W	C15793
C10700	YIL074C	C00052
C06711	YPR035W	C06314
C02700	YOR340C	C06754
C04272	YDL131W	C03263
C00159	YOL011W	C00882
C14839	YMR277W	C04453
C03569	YDR283C	C04044
C01010	YNL202W	C05841
C16286	YER089C	C02218
C03221	YMR304W	C15969
C04302	YDR023W	C11383
C05335	YLR070C	C00542
C00530	YPL258C	C00870
C01104	YLL001W	C02090
C05433	YIL020C	C05634
C05378	YNL135C	C05830
C16309	YCR066W	C06670
C09672	YML054C	C00156
C01987	YLR318W	C00266
C02247	YGL065C	C07643
C00530	YMR306W	C05460
C04824	YGR188C	C06600
C00842	YBR125C	C05512
C00387	YDL028C	C00263
C01504	YDR529C	C00794
C16488	YHR074W	C14858
C00065	YEL046C	C16315
C00583	YDL100C	C16300
C07838	YPR176C	C05985
C16268	YGR040W	C06098
C06606	YBL056W	C11907
C16306	YDR481C	C14039
C02232	YIR029W	C00143
C00132	YKL166C	C00593
C07090	YCL064C	C05818
C07649	YDR009W	C07216
C16358	YMR127C	C05413
C09684	YGL006W	C00828
C02059	YDL159W	C00086
C13632	YOL126C	C05640
C02400	YMR170C	C00811
C12406	YNL247W	C00511
C14828	YOR061W	C07092
C07732	YDR523C	C05698
C02880	YBR097W	C05730
C14899	YJL197W	C00068
C06593	YGL040C	C16462
C05860	YEL012W	C00345
C05634	YPR184W	C06580
C13952	YBR092C	C01134
C05272	YGL130W	C00133
C00061	YKL046C	C02734
C05263	YPR184W	C16391
C10700	YPL064C	C04181
C00571	YFR047C	C05460
C00178	YIL125W	C00010
C05298	YPR110C	C01613
C01165	YJR073C	C00149
C05274	YKL194C	C00437
C06523	YEL011W	C01346
C04332	YDR050C	C06224
C00826	YDR283C	C04076
C00020	YOL064C	C00152
C16489	YDR232W	C00565
C02220	YIL156W	C05125
C03589	YDR054C	C06316
C02666	YKL194C	C05512
C05427	YDR287W	C01345
C05787	YDR035W	C01180
C02934	YGR194C	C01504
C06630	YHR183W	C05356
C05852	YBL045C	C04734
C01120	YHR026W	C06397
C16303	YAL038W	C02139
C01103	YBR038W	C16464
C00381	YDL080C	C05381
C05849	YKL194C	C11429
C02097	YGR040W	C06674
C09666	YDR304C	C05627
C05672	YPL228W	C00064
C05444	YFR055W	C01352
C04556	YJR103W	C00490
C00055	YHR123W	C02165
C06554	YER125W	C15787
C00437	YER023W	C00555
C01508	YHR123W	C00159
C04652	YLR142W	C14771
C06599	YMR217W	C05803
C00337	YHR037W	C00053
C09666	YIL124W	C13309
C15925	YPR184W	C05269
C15898	YDR436W	C01832
C07490	YPL206C	C03406
C02512	YBR110W	C15926
C00178	YDL037C	C06426
C16489	YPL175W	C16440
C01192	YMR022W	C04666
C05516	YMR162C	C00064
C01165	YGR183C	C00191
C04322	YLR089C	C00090
C06727	YLR195C	C00345
C06204	YPR068C	C01697
C05700	YOL049W	C02274
C00811	YJL031C	C00409
C04302	YDR226W	C11088
C00106	YER166W	C02247
C02375	YER023W	C03319
C00601	YPR180W	C00430
C10858	YER099C	C08639
C09815	YGR036C	C01801
C05272	YIR019C	C16144
C08526	YER129W	C01987
C01037	YHL032C	C16500
C11036	YNL256W	C03428
C01575	YBL057C	C00166
C05296	YDR287W	C04297
C00049	YJR130C	C14814
C07394	YDL103C	C00180
C04043	YLR158C	C06536
C15650	YBR213W	C07113
C15900	YPR167C	C14101
C00137	YMR022W	C15793
C04302	YKL029C	C06640
C04896	YIL111W	C06580
C15881	YPL001W	C01596
C02888	YHR051W	C03506
C06731	YBR166C	C00388
C00101	YGR007W	C05265
C03090	YML028W	C03189
C00705	YDR304C	C06102
C16262	YPL078C	C00357
C00559	YDL079C	C00327
C03595	YLR234W	C01467
C06244	YDL052C	C00418
C15793	YDL040C	C00672
C00089	Q0130	C00118
C00206	YHR030C	C00191
C00637	YPL234C	C06397
C00979	YHR043C	C05356
C05272	YDR037W	C05604
C16391	YKR066C	C02633
C16144	YGL156W	C03028
C00352	YNL163C	C06111
C11941	YKL141W	C00463
C00504	YKL046C	C01134
C01468	YDR242W	C00036
C00944	YHL011C	C00931
C05803	YAL062W	C00047
C13634	YCL040W	C16488
C00132	YDR232W	C00527
C00491	YBL033C	C04484
C04188	YIR019C	C00147
C03595	YBL099W	C05577
C15799	YGL187C	C05581
C16267	YML074C	C04079
C03012	YIL145C	C05418
C00811	YGL009C	C00804
C00620	YJR148W	C14115
C01137	YOR168W	C05271
C00166	YJL031C	C06377
C00041	YDL074C	C05691
C00469	YHR046C	C04760
C00842	YLR359W	C04272
C04188	YNR016C	C00794
C14811	YJR103W	C11383
C00647	YLR044C	C04036
C01031	YAL012W	C02909
C00361	YMR208W	C03287
C06606	YMR271C	C08725
C09812	YOR074C	C04454
C00337	YDL188C	C00239
C04330	YOL102C	C00388
C02378	YDR477W	C05802
C15986	YMR189W	C12384
C03589	YLR044C	C07091
C00166	YPL167C	C00337
C05643	YPL175W	C16162
C13952	YOL013C	C02739
C16204	YOL059W	C00302
C00096	YBR035C	C08539
C04691	YOR341W	C04752
C00236	YDR410C	C01096
C00295	YGR012W	C06397
C06593	YKL139W	C15882
C01227	YFR028C	C06369
C05688	YKL024C	C00245
C00111	YGR244C	C04628
C00132	YGR244C	C04216
C04677	YFR053C	C04691
C07836	YNR058W	C04751
C06729	YPL091W	C06754
C00593	YMR261C	C14117
C00881	YOR303W	C02700
C14770	YDR196C	C11509
C05653	YFR010W	C03341
C14853	YNR031C	C07101
C11088	YOL152W	C15605
C01233	YDL103C	C01063
C00127	YNR012W	C00230
C15586	YPR118W	C00448
C04377	YER086W	C04352
C05433	YKL016C	C00254
C07096	YPR080W	C00315
C00219	YHR179W	C00137
C01245	YMR013C	C03428
C00181	YEL038W	C04742
C05516	YMR250W	C05413
C05263	YPR002W	C16156
C09699	YPL152W	C09844
C05444	YBR092C	C00186
C06377	YPL017C	C12414
C16393	YCR073W-A	C00951
C11924	YER014W	C01268
C00097	YGL009C	C00103
C11148	YDR441C	C01097
C12621	YER068W	C04454
C16268	YFL045C	C01697
C07111	YNL330C	C01165
C00127	YLR158C	C02059
C00077	YJR036C	C00077
C11355	YKL001C	C01507
C01724	YDR402C	C04272
C00044	YIR029W	C07088
C14149	YOR278W	C05778
C00512	YPL179W	C14749
C01659	YBR221C	C05802
C16156	YGL205W	C00184
C01516	YBR070C	C00899
C00628	YGR204W	C00361
C13631	YBR035C	C00119
C00219	YHR074W	C00438
C00047	Q0120	C00504
C15882	YFR033C	C00668
C05828	YLR260W	C00671
C00565	YNR033W	C05582
C01189	YLR109W	C06105
C02965	YER183C	C06554
C01983	YDL066W	C14039
C00097	YPL040C	C16267
C00669	YPR035W	C15798
C05787	YOR151C	C00065
C06801	YKL210W	C00957
C04805	YBR166C	C15770
C02442	YCR024C	C01416
C16075	YMR156C	C05460
C00189	YMR306W	C04442
C00341	YAL038W	C14829
C02880	YJR148W	C00110
C04332	YPR060C	C06603
C01170	YNL280C	C03582
C04824	YKL080W	C06504
C02666	YOR124C	C05839
C06723	YCL043C	C03351
C04916	YBR299W	C00239
C06990	YPR118W	C07535
C11785	YHR144C	C05809
C00555	YMR001C	C00068
C00035	YML120C	C05951
C12213	YMR127C	C05401
C02331	YLL019C	C14849
C14769	YOL065C	C06714
C11923	YKL150W	C12837
C01595	YJR057W	C00301
C00267	YDR173C	C00078
C01847	YDL103C	C01847
C00637	YCL043C	C01177
C05803	YPR033C	C01962
C02734	YNL141W	C06648
C05814	YBR176W	C15785
C00078	YMR300C	C01171
C00299	YLR070C	C07086
C09621	YDR092W	C00108
C02631	YDR069C	C00492
C06195	YML068W	C07090
C04352	YDR007W	C15799
C03453	YDL080C	C05515
C04431	YDR242W	C16489
C05527	YLR377C	C08060
C00054	YBR110W	C01230
C05635	YER052C	C00262
C15769	Q0080	C05665
C16202	YBR149W	C12138
C03063	YNR030W	C05689
C16489	YDR294C	C05839
C06174	YOR330C	C15605
C14870	YLR133W	C05271
C12406	YKL182W	C15926
C00183	YFR055W	C00341
C01832	YLR109W	C05692
C05659	YOL140W	C09684
C15925	YLR240W	C02637
C00636	YGL154C	C00624
C05548	YNL117W	C14787
C06075	YNL163C	C01170
C00818	YDR236C	C00957
C00499	YGL062W	C05849
C00642	YBL067C	C04677
C02249	YHL011C	C05627
C11924	YDR529C	C05608
C04582	YGL027C	C00407
C00031	YJR105W	C12214
C06099	YMR277W	C00032
C07495	YBR026C	C11130
C00203	YBR149W	C07118
C07644	YIL010W	C00535
C01083	YFR033C	C01984
C03189	YJL125C	C01530
C02727	YCR048W	C05271
C00570	YJL168C	C00751
C04916	YOR208W	C00542
C00942	YDL100C	C09884
C01097	YDR178W	C03087
C01284	YER151C	C03460
C03918	YOR356W	C06606
C00055	YBR082C	C00075
C13425	YHR042W	C04002
C15877	YLR069C	C04089
C06397	YDR177W	C00380
C02029	YGL001C	C14771
C03506	YAL038W	C11907
C00189	YER069W	C04039
C04805	YHR068W	C00586
C11393	YLR189C	C04692
C03056	YGL037C	C07112
C12986	YGR157W	C03189
C16311	YPL064C	C08830
C05515	YGR184C	C02880
C00449	YLR158C	C04332
C01697	YER014W	C00546
C05527	YDL080C	C06316
C06017	YCR036W	C15857
C06315	YMR105C	C15987
C06189	YMR250W	C00189
C03219	YGR010W	C05298
C00311	YKL166C	C00409
C07118	Q0110	C12406
C12448	YJL101C	C05130
C00647	YMR083W	C16267
C00010	YMR139W	C01233
C00169	YMR223W	C09704
C04327	YKL150W	C00255
C05921	YNL163C	C00438
C05519	YER055C	C00092
C00831	YDR037W	C06730
C13638	YDR347W	C04442
C05901	YDL033C	C04706
C00455	YNR012W	C03058
C14854	YNL169C	C05768
C06731	YHR163W	C00363
C07585	YLR209C	C14148
C09813	YER026C	C03344
C05999	YFR014C	C05830
C00147	YMR271C	C00424
C05831	YGR124W	C06575
C15792	YDR059C	C01530
C11555	YCL017C	C07888
C01245	YGR267C	C04442
C04431	YNL009W	C00583
C14857	YCL018W	C06599
C06314	YHR044C	C00479
C00184	YPR054W	C02442
C13632	YBR166C	C00130
C14840	YOR119C	C00424
C12414	YLR377C	C00137
C16488	YNR031C	C03057
C00364	YIR032C	C02759
C12989	YDR232W	C00357
C00559	YMR170C	C15587
C05642	YNL169C	C12838
C02469	YHR072W	C02734
C01170	YLR420W	C01499
C03546	YOL059W	C02336
C00187	YPL064C	C14858
C01228	YLR286C	C07098
C00379	YJR009C	C14899
C16465	YHL032C	C05582
C05345	YGL194C	C00207
C00132	YIL162W	C00042
C05711	YDL215C	C14786
C04623	YDL171C	C01454
C05814	YML068W	C01192
C00665	YNL009W	C02166
C00448	YDR044W	C07215
C11519	YOL058W	C02378
C02400	YDR111C	C16448
C05809	YDR074W	C04302
C00637	YHR019C	C11457
C00062	YCL004W	C01037
C00129	YNL053W	C00118
C07093	YOR231W	C00380
C16201	YPL231W	C01504
C15877	YDL185W	C07644
C05582	YKL211C	C06604
C01962	YGL184C	C02718
C01246	YPL096W	C02378
C00188	YAL054C	C13952
C11062	YPL160W	C00379
C00104	YFR014C	C06369
C01302	YJL166W	C11062
C03406	YNR034W	C01962
C11940	YDR044W	C05272
C10700	YMR293C	C00032
C07098	YGL055W	C11062
C01120	YMR303C	C05433
C05276	YPL231W	C00114
C00197	YPL204W	C15987
C00141	YAL026C	C00894
C05627	YDR155C	C11150
C05699	YGR262C	C05627
C00437	YER014W	C01172
C06649	YDL103C	C05802
C02029	YGL167C	C01259
[truncated: 70,962 more rows]
