# Supplementary material for: Prediction of Substrate-Enzyme-Product Interaction Based on Molecular Descriptors and Physicochemical Properties
Source: Biomed Res Int. 2013 Dec 22;2013:674215. doi: 10.1155/2013/674215 (PMC3881445; doi:10.1155/2013/674215)
Supplement: Supplementary file 1 — Supplementary Material 1： The ID of 1326 compounds and 939 enzymes of metabolic pathway in Kegg database. Supplementary Material 2：14,592 networking triads of substrate-enzyme-product. Supplementary Material 3: 729,600 non-networking triads of substrate-enzyme-product. Supplementary Material 4: Calculated value of molecular descriptors of 1326 compounds and the categories. Supplementary Material 5: The value of 132 physicochemical descriptors for 939 enzyme. Supplementary Material 6: The MaxRel and mRMR feature tables using mRMR method. [file 674215.f1.zip › 674215.f1/supplemental material IV.csv]

Calculated value of molecular descriptors of 1326 compounds and the categories.
Elemental Analysis: AllAtomCount Mass ExactMass CComposition HComposition OComposition NComposition PComposition SComposition XComposition
Geometry�� AcceptorCount AcceptorSiteCount AliphaticAtomCount AliphaticBondCount AliphaticRingCount AromaticAtomCount AromaticBondCount AromaticRingCount AsymmetricAtomCount BalabanIndex BondCount CarboAliphaticRingCount CarboAromaticRingCount CarboRingCount ChainAtomCount ChainBondCount ChiralCenterCount CyclomaticNumber DonorCount DonorSiteCount DreidingEnergy FusedAliphaticRingCount FusedAroma…
Chemical�� FormalCharge HMOTotalPiEnergy LogD LogP Polarizability PolarSurfaceArea Refractivity SurfaceArea VanDerWaalsSurfaceArea WaterAccessibleSurfaceArea WaterAccessibleSurfaceAreaHydrophobic WaterAccessibleSurfaceAreaNegative WaterAccessibleSurfaceAreaPlus WaterAccessibleSurfaceAreaPolar
compoundID	Formula	AllAtomCount	Mass	ExactMass	CComposition	HComposition	OComposition	NComposition	PComposition	SComposition	XComposition	DreidingEnergy	MaximalProjectionArea	MaximalProjectionRadius	MinimalProjectionArea	MinimalProjectionRadius	Volume	MaxZ	MinZ	AcceptorCount	DonorCount	AcceptorSiteCount	DonorSiteCount	IsoElectricPoint	LogD	LogP	MicrospeciesCount	MicrospeciesCount	Polarizability	Refractivity	ResonantCount	StereoIsomerCount	DoubleBondStereoIsomerCount	TetrahedralStereoIsomerCount	TautomerCount	BondCount	CyclomaticNumber	RingCount	RingAtomCount	RingBondCount	ChainAtomCount	ChainBondCount	AliphaticRingCount	AromaticRingCount	AliphaticAtomCount	AliphaticBondCount	AromaticAtomCount	AromaticBondCount	CarboRingCount
C00002	C10H16N5O13P3	47	507.181	506.9957452	23.6813	3.1797	41.0095	13.8084	18.3211	0	0	191.34	105.2599761	8.475127481	54.95586485	5.198573261	350.8243876	7.734112694	16.87487668	14	7	17	8	2.315394358	-10.31761055	-6.441039553	256	15	38.64708079	95.8143	4863	64	1	64	3	49	3	3	14	15	17	18	1	2	22	23	9	10	0
C00003	C21H28N7O14P2	72	664.433	664.1169467	37.9609	4.2476	33.7117	14.7565	9.3234	0	0	213.44	125.5535804	8.231121738	80.36002051	6.335288094	506.9926495	10.33381876	15.18951185	15	8	18	10	4.204815296	-11.72088098	-10.62452003	256	23	56.31212827	141.9969	5000	1024	1	1024	6	76	5	5	25	26	19	22	2	3	29	32	15	16	0
C00004	C21H29N7O14P2	73	665.441	665.1247717	37.9034	4.3926	33.6606	14.7341	9.3092	0	0	220.61	125.9501306	7.871845658	86.5618512	6.429034052	508.6485779	10.34136757	15.20327133	16	8	19	10	3.635682467	-8.570511472	-6.670233062	256	21	56.70642043	142.9997	5000	1024	1	1024	6	77	5	5	25	26	19	22	3	2	35	38	9	10	0
C00005	C21H30N7O17P3	78	745.4209	745.0911021	33.8365	4.0565	36.4881	13.1532	12.4656	0	0	314.6	144.8519769	11.06930752	86.4115925	6.703637669	555.8577508	13.34545471	21.31595009	18	9	22	11	2.844940846	-12.34128968	-7.637618633	256	22	61.2912233	153.8726	5000	1024	1	1024	6	82	5	5	25	26	23	26	3	2	39	42	9	10	0
C00006	C21H29N7O17P3	77	744.4129	744.0832771	33.8824	3.9266	36.5375	13.171	12.4825	0	0	293.53	154.8625887	10.01518282	88.8277306	6.716992078	553.5282343	10.97413495	19.55242666	17	9	21	11	2.907752001	-15.49228319	-11.65668507	256	24	60.90057762	152.8698	5000	1024	1	1024	6	81	5	5	25	26	23	26	2	3	33	36	15	16	0
C00008	C10H15N5O10P2	42	427.2011	427.0294147	28.1149	3.5391	37.4517	16.3936	14.5008	0	0	141.53	96.84928837	7.963204013	51.95168123	6.099385141	305.8127331	7.698795763	15.05256684	12	6	14	7	2.696828886	-7.522226895	-5.57237267	256	14	33.85385409	84.9414	1343	32	1	32	3	44	3	3	14	15	13	14	1	2	18	19	9	10	0
C00010	C21H36N7O16P3S	84	767.534	767.1152084	32.8617	4.7276	33.3523	12.7743	12.1065	4.1777	0	219.18	156.995383	10.49791416	97.1754427	7.684621415	593.6043234	10.28598018	20.75866738	16	10	21	11	2.120196867	-11.62878988	-6.9954768	256	22	64.90519446	162.7402	5000	128	1	128	36	86	3	3	14	15	34	35	1	2	39	40	9	10	0
C00015	C9H14N2O12P2	39	404.1612	404.0021969	26.7458	3.4915	47.504	6.9312	15.3274	0	0	135.89	89.39025814	7.112096734	50.62527877	5.082386362	287.678952	7.475237702	14.19899661	10	6	14	6	NaN	-7.84245561	-2.960606652	256	13	30.312477	74.3114	272	32	1	32	3	40	2	2	11	11	14	15	1	1	19	20	6	6	0
C00016	C27H33N9O15P2	86	785.5497	785.1571345	41.2818	4.2342	30.5507	16.0474	7.8859	0	0	235.26	172.5741326	10.78441553	101.0276534	7.48718096	608.9285894	12.08636421	21.51216287	19	9	23	10	2.90899396	-7.707071821	-5.495749552	256	21	68.07207494	177.4308	5000	512	1	512	9	91	6	6	28	31	25	27	1	5	30	32	23	26	1
C00018	C8H10NO6P	26	247.1419	247.0245736	38.8787	4.0784	38.8426	5.6675	12.5328	0	0	70.87	65.09378472	5.981010822	31.69061008	3.941696377	192.988174	5.755130262	11.94261485	6	3	8	3	2.898165043	-2.828470566	-2.141738234	32	16	20.72589417	54.7463	108	1	1	1	2	26	1	1	6	6	10	10	0	1	10	10	6	6	0
C00019	C15H22N6O5S	49	398.437	398.1372385	45.2168	5.5654	20.0777	21.0925	0	8.0477	0	69.93	104.9227198	7.379452252	58.31427428	6.162349727	334.7295057	7.111885678	14.73701582	10	4	12	6	10.92668098	-5.435365221	-5.435365221	256	16	38.45401642	107.072	158	64	1	64	12	51	3	3	14	15	13	14	1	2	18	19	9	10	0
C00020	C10H14N5O7P	37	347.2212	347.0630843	34.5909	4.064	32.2549	20.1697	8.9205	0	0	91.54	86.10216386	6.93395406	44.91828706	4.942733284	260.8905926	7.065445198	13.4464568	10	5	11	6	3.882063762	-5.406157083	-5.219960365	256	13	29.08945553	74.0685	316	16	1	16	3	39	3	3	14	15	9	10	1	2	14	15	9	10	0
C00021	C14H20N6O5S	46	384.411	384.1215885	43.7422	5.2441	20.8103	21.8621	0	8.3413	0	58.48	99.82630743	8.653637938	52.10861647	5.658059634	316.9744404	6.313624042	17.30718181	10	5	11	7	7.319673401	-4.165415377	-4.165415377	256	13	36.39631683	92.7235	237	32	1	32	12	48	3	3	14	15	12	13	1	2	17	18	9	10	0
C00022	C3H4O3	10	88.0621	88.01604399	40.9167	4.5783	54.5049	0	0	0	0	4.64	30.416241	3.634649793	18.48010889	2.988227072	75.07680686	4.175021338	6.922229978	3	1	5	1	NaN	-3.353685284	0.065873953	8	4	7.024708174	17.9897	5	1	1	1	2	9	0	0	0	0	6	5	0	0	6	5	0	0	0
C00024	C23H38N7O17P3S	89	809.571	809.1257731	34.1225	4.7311	33.5968	12.111	11.4778	3.9607	0	242.27	164.0848395	11.60185938	93.8400429	7.323745667	630.1290315	9.898517602	22.30404785	17	9	23	10	2.120196387	-11.78784164	-7.154869239	256	23	68.73395808	172.208	5000	128	1	128	36	91	3	3	14	15	37	38	1	2	42	43	9	10	0
C00025	C5H9NO4	19	147.1293	147.0531578	40.8168	6.1656	43.4975	9.52	0	0	0	8.56	42.57520644	5.140662671	26.91186462	3.36006023	129.5712239	6.587596028	10.08661453	5	3	7	4	2.796241152	-5.998483559	-3.376775941	16	32	12.69048005	31.2877	9	2	1	2	16	18	0	0	0	0	10	9	0	0	10	9	0	0	0
C00026	C5H6O5	16	146.0981	146.0215233	41.1049	4.1394	54.7557	0	0	0	0	8.18	45.75112864	5.127548724	23.4483074	3.236585463	119.7758467	5.433596907	10.23552355	5	2	8	2	NaN	-6.580309242	-0.1092633	32	16	11.37934821	28.883	15	1	1	1	18	15	0	0	0	0	10	9	0	0	10	9	0	0	0
C00029	C15H24N2O17P2	60	566.3018	566.0550204	31.8135	4.2717	48.0291	4.9467	10.939	0	0	166.66	106.8211241	7.770131441	72.79531711	5.385686463	422.8263667	11.2747414	14.47108984	14	9	18	9	NaN	-9.735745794	-4.996608079	256	21	44.259936	106.4558	352	2048	1	2048	3	62	3	3	17	17	19	21	2	1	30	32	6	6	0
C00031	C6H12O6	24	180.1559	180.0633881	40.001	6.7138	53.2852	0	0	0	0	17.54	46.03248392	4.7993741	35.34510083	4.079193534	154.3467404	6.584168408	9.546218425	6	5	6	5	4.219934327	-2.932561057	-2.932539218	64	128	15.15588267	35.9234	1	32	1	32	1	24	1	1	6	6	6	6	1	0	12	12	0	0	0
C00032	C34H32FeN4O4	75	616.487	616.1772977	66.2405	5.2319	10.381	9.0881	0	0	0	229.02	158.4693594	8.784907981	81.74955977	7.778838234	520.7814959	10.19693419	17.63529852	6	2	8	2	3.162658947	2.460933935	8.067046105	16	64	69.23800976	165.0326	4996	1	1	1	4	80	6	6	25	30	18	18	4	2	33	38	10	10	0
C00033	C2H4O2	8	60.052	60.02112937	40.001	6.7138	53.2852	0	0	0	0	0.93	22.56368678	3.158614521	15.39978483	2.637324492	55.91786004	4.758289456	6.141537088	2	1	3	1	NaN	-2.646173272	-0.223345714	2	4	5.030792	12.6437	3	1	1	1	2	7	0	0	0	0	4	3	0	0	4	3	0	0	0
C00035	C10H15N5O11P2	43	443.2005	443.0243294	27.0999	3.4113	39.7097	15.8018	13.9773	0	0	144.37	100.3457523	8.562365234	50.51259859	5.006577172	313.4689608	7.481892815	16.98462839	12	7	15	8	1.501834752	-8.132216855	-3.834315207	256	13	33.72205336	86.3669	1649	32	1	32	6	45	3	3	14	15	14	15	1	2	19	20	9	10	0
C00036	C4H4O5	13	132.0716	132.0058732	36.3763	3.0527	60.5709	0	0	0	0	5.87	37.76301735	4.490654962	24.76334215	3.26902961	102.8108744	5.465532068	8.890300241	5	2	8	2	NaN	-6.72336574	-0.041897601	16	8	9.610560235	24.3338	15	1	1	1	4	12	0	0	0	0	9	8	0	0	9	8	0	0	0
C00037	C2H5NO2	10	75.0666	75.03202841	32.0001	6.7136	42.6272	18.659	0	0	0	1.29	26.11357943	3.745498239	18.37174837	2.639167117	67.84910145	5.279331837	7.027332192	3	2	4	3	5.776447446	-3.548020451	-3.546007137	8	8	6.5496649	16.0034	3	1	1	1	3	9	0	0	0	0	5	4	0	0	5	4	0	0	0
C00041	C3H7NO2	13	89.0932	89.04767847	40.4432	7.9193	35.9161	15.7214	0	0	0	3.54	29.51017757	3.684220123	23.03398148	2.987318913	84.89480476	5.280081836	7.045451955	3	2	4	3	5.979935795	-2.978508588	-2.977393421	8	8	8.358352083	20.4973	3	2	1	2	4	12	0	0	0	0	6	5	0	0	6	5	0	0	0
C00042	C4H6O4	14	118.088	118.0266087	40.6839	5.1213	54.1948	0	0	0	0	4.9	38.59904052	4.949477911	20.81215245	3.008023875	100.649352	5.446256495	9.316279754	4	2	6	2	NaN	-4.915619967	-0.398482967	16	16	9.383458065	23.537	6	1	1	1	5	13	0	0	0	0	8	7	0	0	8	7	0	0	0
C00043	C17H27N3O17P2	66	607.3537	607.0815695	33.6183	4.4808	44.7828	6.9186	10.1996	0	0	165.58	124.385629	7.580586697	80.2813466	6.325292104	462.065021	10.67874948	14.65631279	14	9	19	9	0.461490595	-10.02368718	-5.284643272	256	23	48.47945565	117.5571	1056	2048	1	2048	9	68	3	3	17	17	22	24	2	1	33	35	6	6	0
C00044	C10H16N5O14P3	48	523.1804	522.9906598	22.9571	3.0825	42.8135	13.3861	17.7608	0	0	193.72	108.7194224	9.051225253	53.1975641	5.028194243	358.3653639	7.606225013	18.04401249	14	8	18	9	1.122927431	-10.89873269	-4.644495737	256	14	38.53583817	97.2398	4860	64	1	64	6	50	3	3	14	15	18	19	1	2	23	24	9	10	0
C00047	C6H14N2O2	24	146.1876	146.1055277	49.2957	9.6528	21.8889	19.1626	0	0	0	10.31	50.20164537	5.927509898	27.32011222	3.310270701	147.8010602	6.930251251	11.97460973	4	3	5	5	9.822775995	-5.759850589	-3.756600997	16	16	15.365045	37.8095	3	2	1	2	4	23	0	0	0	0	10	9	0	0	10	9	0	0	0
C00048	C2H2O3	7	74.0355	74.00039393	32.4458	2.7229	64.8313	0	0	0	0	1.13	24.96393649	3.246968765	13.87912587	2.637053839	58.22473887	3.584696129	6.343152591	3	1	5	1	NaN	-3.607663205	-0.133675038	4	4	5.255616421	13.5	5	1	1	1	2	6	0	0	0	0	5	4	0	0	5	4	0	0	0
C00049	C4H7NO4	16	133.1027	133.0375077	36.0945	5.3009	48.0814	10.5232	0	0	0	5.79	39.35949836	4.64658865	23.71783627	3.003075687	112.6267308	6.029725896	9.0321628	5	3	7	4	3.416573167	-5.502584265	-3.639214656	32	32	10.89648463	26.5327	9	2	1	2	10	15	0	0	0	0	9	8	0	0	9	8	0	0	0
C00051	C10H17N3O6S	37	307.323	307.083806	39.0817	5.5756	31.2363	13.6729	0	10.4336	0	41.08	78.41407589	7.170318893	43.26336997	4.594781015	260.7198906	7.689009367	13.74567727	7	6	11	7	2.836423113	-8.006215662	-5.026041029	256	11	27.46631337	69.1149	81	4	1	4	920	36	0	0	0	0	20	19	0	0	20	19	0	0	0
C00052	C15H24N2O17P2	60	566.3018	566.0550204	31.8135	4.2717	48.0291	4.9467	10.939	0	0	176.89	111.0989102	7.957490114	63.5521315	5.982565233	422.8893659	7.936893453	15.76643165	14	9	18	9	NaN	-9.735745794	-4.996608079	256	21	44.259936	106.4558	352	2048	1	2048	3	62	3	3	17	17	19	21	2	1	30	32	6	6	0
C00053	C10H15N5O13P2S	46	507.264	506.9862293	23.6774	2.9805	41.0028	13.8061	12.2121	6.3212	0	178.53	99.12438275	7.385476904	65.35848148	5.948313567	351.0177509	10.44588684	13.87344046	14	6	18	7	1.510497453	-10.82726269	-8.005379843	256	15	38.88184574	94.9332	2295	32	1	32	3	48	3	3	14	15	17	18	1	2	22	23	9	10	0
C00054	C10H15N5O10P2	42	427.2011	427.0294147	28.1149	3.5391	37.4517	16.3936	14.5008	0	0	137.59	90.14089736	7.264576334	58.04084542	5.719595769	305.9290563	10.15761308	14.37077735	12	6	14	7	2.044385397	-9.019447576	-6.352141854	256	15	33.69712513	84.9414	1264	16	1	16	3	44	3	3	14	15	13	14	1	2	18	19	9	10	0
C00055	C9H14N3O8P	35	323.1965	323.051851	33.446	4.3661	39.6029	13.0014	9.5836	0	0	78.97	78.34201107	6.544442785	46.49965143	5.522181413	246.1746908	7.112212711	11.78464402	9	5	11	6	0.907834765	-6.107159291	-3.304353339	256	256	26.07334438	65.4177	72	16	1	16	3	36	2	2	11	11	10	11	1	1	15	16	6	6	0
C00058	CH2O2	5	46.0254	46.00547931	26.0958	4.3799	69.5242	0	0	0	0	0.06	17.47542829	2.659037174	11.4314611	2.311531503	39.20982407	3.408989129	5.19170496	2	1	3	1	NaN	-2.939646935	-0.272044422	2	2	3.259014	8.1532	3	1	1	1	1	4	0	0	0	0	3	2	0	0	3	2	0	0	0
C00061	C17H21N4O9P	52	456.3438	456.1046148	44.743	4.6383	31.554	12.2773	6.7874	0	0	114.62	114.6902963	7.971428384	60.20901894	6.292888483	365.5961453	8.313310766	15.87214311	11	6	14	6	NaN	-4.327534226	-1.040106291	256	256	39.99848347	107.1413	1902	8	1	8	3	54	3	3	14	16	17	17	0	3	17	17	14	16	1
C00062	C6H14N4O2	26	174.201	174.1116757	41.3684	8.1005	18.3689	32.1622	0	0	0	14.41	57.82842073	6.640405	26.59275667	3.490828157	163.2127424	5.550542862	13.20146345	6	5	7	7	10.76918925	-6.076076189	-4.354183691	64	64	16.90403238	53.9231	12	2	1	2	8	25	0	0	0	0	12	11	0	0	12	11	0	0	0
C00063	C9H16N3O14P3	45	483.1563	482.9845118	22.3729	3.3379	46.3601	8.697	19.2321	0	0	179.78	98.75683949	7.644623177	55.9979499	5.392997352	336.0890493	7.760956798	15.02923707	13	7	17	8	0.690964605	-11.01898952	-4.357782263	256	14	35.6775649	87.1635	1332	64	1	64	3	46	2	2	11	11	18	19	1	1	23	24	6	6	0
C00064	C5H10N2O3	20	146.1445	146.0691422	41.0919	6.8969	32.843	19.1683	0	0	0	11.14	44.94482792	5.052803826	26.8737015	3.27155602	132.1629641	5.987559647	9.904373034	4	3	6	5	5.727517138	-4.139550338	-4.137833367	32	32	13.31760128	33.1099	9	2	1	2	21	19	0	0	0	0	10	9	0	0	10	9	0	0	0
C00065	C3H7NO3	14	105.0926	105.0425931	34.286	6.7137	45.6723	13.328	0	0	0	3.74	31.83910523	4.017878483	23.02023539	3.080819343	93.50490044	5.816850795	7.685225673	4	3	5	4	5.691890927	-4.028541117	-4.02426339	16	16	9.064301786	22.041	3	2	1	2	5	13	0	0	0	0	7	6	0	0	7	6	0	0	0
C00067	CH2O	4	30.026	30.01056469	40.001	6.7138	53.2852	0	0	0	0	0	13.91796703	2.344619216	9.079202769	2.083316038	30.77164265	3.22	4.407092788	1	0	2	0	NaN	-0.466975409	-0.466975409	2	1	2.676496	6.307	2	1	1	1	1	3	0	0	0	0	2	1	0	0	2	1	0	0	0
C00068	C12H19N4O7P2S	45	425.314	425.0449677	33.8875	4.5028	26.3325	13.173	14.5651	7.5391	0	136.6	98.23491566	9.074311296	49.57989209	4.761175911	328.2103165	7.805136597	17.57181722	8	4	10	5	4.169480024	-7.283137683	-5.841400711	256	128	36.06663411	95.1455	3060	2	1	2	3	46	2	2	11	11	15	16	0	2	15	16	11	11	0
C00072	C6H8O6	20	176.1241	176.032088	40.9167	4.5783	54.505	0	0	0	0	27.34	46.93061098	5.244790831	28.81010087	3.739509288	138.9637579	6.059596014	10.18025816	5	4	6	4	1.285185974	-4.501965674	-1.913558876	64	32	14.37642852	37.0321	10	4	1	4	4	20	1	1	5	5	7	7	1	0	12	12	0	0	0
C00073	C5H11NO2S	20	149.211	149.0510493	40.2474	7.4306	21.4453	9.3872	0	21.4897	0	11.06	46.28319176	5.661830664	24.97372621	3.193605731	137.7574881	5.908466466	11.32445105	3	2	4	3	6.014139105	-2.326950451	-2.325916204	8	8	15.0693846	37.586	3	2	1	2	4	19	0	0	0	0	9	8	0	0	9	8	0	0	0
C00074	C3H5O6P	15	168.042	167.9823744	21.4423	2.9991	57.1264	0	18.4322	0	0	50.27	42.22323236	4.550468941	25.59070234	3.514928664	118.9867953	5.649009326	8.488201629	5	3	7	3	NaN	-7.200725769	-0.639575534	8	8	11.94570586	30.1317	22	1	1	1	1	14	0	0	0	0	10	9	0	0	10	9	0	0	0
C00075	C9H15N2O15P3	44	484.1411	483.9685274	22.3274	3.1229	49.5705	5.7862	19.193	0	0	185.22	97.47732495	7.664209316	54.14588574	5.070696334	332.615464	7.635431014	15.3336505	12	7	17	7	NaN	-10.63784019	-3.382405131	256	14	35.13347716	85.1843	1184	64	1	64	3	45	2	2	11	11	18	19	1	1	23	24	6	6	0
C00077	C5H12N2O2	21	132.161	132.0898776	45.4397	9.1519	24.212	21.1964	0	0	0	8.2	44.53622579	5.362603875	25.91267462	3.297145857	130.8601426	5.948720503	10.52377249	4	3	5	5	9.818479743	-6.072421979	-4.017440077	16	16	13.53387022	33.2085	3	2	1	2	4	20	0	0	0	0	9	8	0	0	9	8	0	0	0
C00078	C11H12N2O2	27	204.2252	204.0898776	64.6922	5.9225	15.6684	13.7169	0	0	0	35.97	64.38354632	6.313756971	34.29300148	4.128190582	182.3428761	5.842805185	12.56180152	3	3	4	4	5.974857547	-1.223298665	-1.221953009	16	16	23.09200183	56.2028	78	2	1	2	4	28	2	2	9	10	6	6	0	2	6	6	9	10	1
C00079	C9H11NO2	23	165.1891	165.0789786	65.4379	6.7119	19.371	8.4792	0	0	0	21.08	51.97731836	5.779094688	27.49707423	3.480497936	155.6791776	6.09727093	11.26829152	3	2	4	3	5.964398499	-1.322234412	-1.321032187	8	8	17.88725288	45.1163	3	2	1	2	4	23	1	1	6	6	6	6	0	1	6	6	6	6	1
C00081	C10H15N4O14P3	46	508.1658	507.9797607	23.6354	2.9752	44.0784	11.0253	18.2856	0	0	194.14	104.4730519	8.54293986	53.62030651	5.018648782	347.477552	7.634991314	17.07432283	13	7	17	7	0.625529047	-10.70442146	-3.562243597	256	13	37.36022333	93.9505	4774	64	1	64	3	48	3	3	14	15	17	18	1	2	22	23	9	10	0
C00082	C9H11NO3	24	181.1885	181.0738932	59.6596	6.1192	26.4908	7.7305	0	0	0	23.11	54.34789076	6.110170664	27.8715362	3.448109544	164.1356591	5.89906606	12.00667926	4	3	5	4	5.506133975	-1.627803484	-1.625391627	16	16	18.51252196	47.0972	15	2	1	2	4	24	1	1	6	6	7	7	0	1	7	7	6	6	1
C00083	C24H38N7O19P3S	92	853.58	853.1156023	33.7703	4.4872	35.6134	11.4866	10.8861	3.7565	0	270.96	173.8015837	12.45233079	103.3634604	7.399232924	660.0282147	10.03630494	23.83079557	19	10	26	11	2.083691729	-14.95585438	-7.270112296	256	24	71.28040451	178.5521	5000	128	1	128	72	94	3	3	14	15	40	41	1	2	45	46	9	10	0
C00084	C2H4O	7	44.0526	44.02621475	54.5289	9.1521	36.3189	0	0	0	0	1.59	19.43548004	2.941771684	13.28983845	2.396312609	47.45059165	3.948918259	5.49112475	1	0	2	0	NaN	-0.38196198	-0.381961967	4	2	4.496272667	11.7183	2	1	1	1	2	6	0	0	0	0	3	2	0	0	3	2	0	0	0
C00085	C6H13O9P	29	260.1358	260.0297185	27.7025	5.0371	55.3536	0	11.9068	0	0	60.63	63.41733778	5.796798518	38.17065227	4.51951038	198.7140007	6.683832761	11.02895816	8	6	9	6	NaN	-6.071026526	-2.881565349	128	256	19.793746	47.2337	4	16	1	16	1	29	1	1	5	5	11	11	1	0	16	16	0	0	0
C00086	CH4N2O	8	60.0553	60.03236276	19.9994	6.7134	26.6411	46.646	0	0	0	6.09	23.62419867	3.197325177	14.46248175	2.871561472	52.62901375	3.408833597	5.664569157	1	2	2	4	6.674863829	-1.363833863	-1.363833862	8	8	5.02445	13.1426	3	1	1	1	2	7	0	0	0	0	4	3	0	0	4	3	0	0	0
C00089	C12H22O11	45	342.2965	342.1162115	42.1063	6.4782	51.4155	0	0	0	0	41.22	74.66565464	5.476541356	56.94065181	4.964400645	288.8414021	9.173538168	10.5513776	11	8	11	8	4.588703122	-4.528841216	-4.528834964	256	18	28.9697942	68.7741	1	512	1	512	1	46	2	2	11	11	12	13	2	0	23	24	0	0	0
C00090	C6H6O2	14	110.1106	110.0367794	65.4471	5.4923	29.0606	0	0	0	0	16.21	38.24532695	3.929548439	22.59086564	3.6137949	99.0136431	4.662704638	7.917057623	2	2	2	2	NaN	1.364157796	1.366115173	4	4	11.53935263	30.0198	8	1	1	1	1	14	1	1	6	6	2	2	0	1	2	2	6	6	1
C00091	C25H40N7O19P3S	95	867.607	867.1312524	34.6087	4.647	35.0376	11.3008	10.7101	3.6958	0	240.89	170.0296947	11.64155954	91.41644606	6.145397571	675.1146136	12.52375634	23.15313365	19	10	26	11	2.090914965	-14.94194617	-7.335715287	256	24	73.07647998	183.1013	5000	128	1	128	72	97	3	3	14	15	41	42	1	2	46	47	9	10	0
C00092	C6H13O9P	29	260.1358	260.0297185	27.7025	5.0371	55.3536	0	11.9068	0	0	58.95	65.37551512	5.884061029	37.07233092	4.584723203	199.2755683	7.093832759	11.5967331	8	6	9	6	NaN	-6.244320586	-3.056105249	128	256	19.793746	46.7963	4	32	1	32	1	29	1	1	6	6	10	10	1	0	16	16	0	0	0
C00093	C3H9O6P	19	172.0737	172.0136745	20.9399	5.2718	55.788	0	18.0003	0	0	47.13	45.0909572	5.422866015	24.05893237	3.034331509	132.9115876	6.725454757	10.76375345	5	4	6	4	NaN	-4.927419377	-1.962580054	16	16	12.86560871	31.389	4	2	1	2	1	18	0	0	0	0	10	9	0	0	10	9	0	0	0
C00095	C6H12O6	24	180.1559	180.0633881	40.001	6.7138	53.2852	0	0	0	0	18.04	47.853577	4.7042757	34.69954409	4.035924659	153.9358062	6.672045072	9.107841714	6	5	6	5	3.735028142	-2.758224691	-2.757999318	64	128	15.15588267	36.3608	1	16	1	16	1	24	1	1	5	5	7	7	1	0	12	12	0	0	0
C00096	C16H25N5O16P2	64	605.3411	605.0771528	31.7459	4.1627	42.2886	11.5693	10.2335	0	0	170.36	116.8277539	7.76752386	72.20257193	5.853972645	448.6396618	9.342773059	15.24215287	16	10	19	11	1.479030181	-10.02555114	-5.889283675	256	22	47.67583844	118.5113	2134	2048	1	2048	6	67	4	4	20	21	19	21	2	2	30	32	9	10	0
C00097	C3H7NO2S	14	121.158	121.0197492	29.7398	5.8235	26.4108	11.5607	0	26.4654	0	4.59	35.28262044	4.242186782	23.06638897	3.069219208	103.4635521	5.313718886	8.532741553	3	3	4	4	5.672353161	-2.931725922	-2.928606907	16	16	11.41502293	28.2236	3	2	1	2	6	13	0	0	0	0	7	6	0	0	7	6	0	0	0
C00099	C3H7NO2	13	89.0932	89.04767847	40.4432	7.9193	35.9161	15.7214	0	0	0	3.2	32.59022376	4.300109863	19.58109645	2.817297084	84.7974865	5.162816303	8.669041887	3	2	4	3	6.954224293	-3.304455909	-3.304455909	4	8	8.358352083	20.7028	3	1	1	1	2	12	0	0	0	0	6	5	0	0	6	5	0	0	0
C00100	C24H40N7O17P3S	92	823.597	823.1414231	34.9997	4.8953	33.0246	11.9047	11.2824	3.8933	0	269.65	155.7556803	10.79392897	96.1464092	7.062679452	648.9353396	14.03709547	20.98064281	17	9	23	10	2.120196387	-11.08730579	-6.454333392	256	23	70.53484037	176.8349	5000	128	1	128	36	94	3	3	14	15	38	39	1	2	43	44	9	10	0
C00101	C19H23N7O6	55	445.4292	445.1709815	51.2322	5.2046	21.5514	22.0118	0	0	0	64.61	113.0349967	10.72606513	52.95173669	5.155453361	374.6410189	10.2534242	21.50953784	11	8	15	9	3.833283979	-7.816854588	-3.447207924	256	16	41.33850229	121.5866	3220	4	1	4	276	57	3	3	16	17	16	17	1	2	20	22	12	12	1
C00103	C6H13O9P	29	260.1358	260.0297185	27.7025	5.0371	55.3536	0	11.9068	0	0	58.79	64.07858626	5.133153383	39.9727978	5.116148434	199.2088317	7.741860357	9.800322129	8	6	9	6	NaN	-6.269104493	-3.056105249	128	13	19.793746	46.7963	4	32	1	32	1	29	1	1	6	6	10	10	1	0	16	16	0	0	0
C00104	C10H14N4O11P2	41	428.1859	428.0134303	28.0502	3.2956	41.1021	13.0847	14.4674	0	0	144.15	95.59736591	8.052332193	50.44650652	4.976781144	302.4477767	7.452862992	16.07149988	11	6	14	6	1.127535076	-7.909343522	-3.226254205	256	12	32.54630744	83.0776	1173	32	1	32	3	43	3	3	14	15	13	14	1	2	18	19	9	10	0
C00105	C9H13N2O9P	34	324.1813	324.0358665	33.3444	4.0419	44.4179	8.6413	9.5545	0	0	85.45	79.23423759	6.123306329	44.44178022	4.847457526	242.7932879	6.864202551	12.19200575	8	5	11	5	NaN	-5.725736456	-2.538808173	128	256	25.50913867	63.4385	64	16	1	16	3	35	2	2	11	11	10	11	1	1	15	16	6	6	0
C00106	C4H4N2O2	12	112.0868	112.0272774	42.8621	3.597	28.5482	24.9926	0	0	0	20.15	37.10703326	3.879052761	20.45989587	3.509454948	88.73785361	3.4	7.657239181	2	2	4	2	NaN	-0.85602181	-0.855291	8	8	9.667972414	25.9693	16	1	1	1	6	12	1	1	6	6	2	2	0	1	2	2	6	6	0
C00108	C7H7NO2	17	137.136	137.0476785	61.3077	5.145	23.3336	10.2137	0	0	0	20.18	49.21663307	4.725855151	22.98370988	3.886525288	120.8581421	3.575668536	9.248225756	3	2	4	3	3.350896515	-0.78330269	1.45190277	4	4	13.8101806	38.0146	24	1	1	1	1	17	1	1	6	6	4	4	0	1	4	4	6	6	1
C00109	C4H6O3	13	102.0886	102.0316941	47.0599	5.9239	47.0162	0	0	0	0	5.64	34.65087591	4.261257593	22.07071688	3.149455078	92.08799329	5.395110284	8.314537923	3	1	5	1	NaN	-2.581138909	0.7664098	8	4	8.816896296	22.6166	5	1	1	1	6	12	0	0	0	0	7	6	0	0	7	6	0	0	0
C00110	C25H45O4P	75	440.5962	440.3055464	68.1503	10.2945	14.5252	0	7.03	0	0	123.12	139.3405205	11.85716064	69.29202182	6.4141489	458.8465183	8.536456706	23.7365592	3	2	4	2	NaN	4.836271798	7.607632111	4	4	50.6530275	132.7668	4	16	8	2	1	74	0	0	0	0	30	29	0	0	30	29	0	0	0
C00111	C3H7O6P	17	170.0578	169.9980245	21.1881	4.1489	56.4493	0	18.2137	0	0	46.42	42.94409191	4.663355122	25.76207939	3.398809629	126.3970075	5.957352443	9.033252705	5	3	7	3	NaN	-4.863534387	-1.651782315	64	32	12.35400891	30.4721	8	1	1	1	4	16	0	0	0	0	10	9	0	0	10	9	0	0	0
C00112	C9H15N3O11P2	40	403.1764	403.0181814	26.8112	3.75	43.6517	10.4223	15.3649	0	0	130.42	90.17042094	7.041812074	51.07406933	5.781258231	291.139854	7.823109031	13.31357918	11	6	14	7	1.231352599	-8.223872253	-3.633883155	256	13	30.86468931	76.2906	306	32	1	32	3	41	2	2	11	11	14	15	1	1	19	20	6	6	0
C00114	C5H14NO	21	104.1708	104.1075391	57.6491	13.5462	15.3588	13.4459	0	0	0	23.97	37.98637401	4.518994354	27.36229784	3.324790237	121.6072309	6.151879194	8.987988656	1	1	1	1	NaN	-4.662268529	-4.662269163	2	2	12.02141397	42.194	1	1	1	1	1	20	0	0	0	0	7	6	0	0	7	6	0	0	0
C00116	C3H8O3	14	92.0938	92.04734412	39.1254	8.7558	52.1188	0	0	0	0	3.59	33.39850814	4.379322421	20.3454377	3.021220708	87.94575959	5.114118273	8.560073817	3	3	3	3	5.505272039	-1.83901413	-1.839014023	8	8	8.23205888	20.5161	1	1	1	1	1	13	0	0	0	0	6	5	0	0	6	5	0	0	0
C00117	C5H11O8P	25	230.1098	230.0191538	26.0978	4.8183	55.6235	0	13.4604	0	0	59.16	56.72035435	5.624028338	33.09779362	4.134619881	173.215645	6.409110446	11.12946538	7	5	8	5	NaN	-5.614191649	-2.425770307	64	128	17.28243	40.8338	4	16	1	16	1	25	1	1	5	5	9	9	1	0	14	14	0	0	0
C00118	C3H7O6P	17	170.0578	169.9980245	21.1881	4.1489	56.4493	0	18.2137	0	0	47.27	43.83089011	4.96330475	26.00835704	3.493673364	126.5887532	6.627173742	9.948616165	5	3	7	3	NaN	-4.848949565	-1.800921768	32	32	12.35400891	30.331	8	2	1	2	4	16	0	0	0	0	10	9	0	0	10	9	0	0	0
C00119	C5H13O14P3	35	390.0696	389.9518147	15.3956	3.3592	57.4235	0	23.8217	0	0	146.46	79.30333107	7.104778357	48.7260274	4.774628983	263.0416662	7.623792145	13.98981365	11	7	14	7	NaN	-11.04491225	-2.971134818	256	13	26.805842	62.5796	68	32	1	32	1	35	1	1	5	5	17	17	1	0	22	22	0	0	0
C00120	C10H16N2O3S	32	244.311	244.0881631	49.1615	6.601	19.6464	11.4663	0	13.1247	0	41.15	66.13519336	6.630431887	40.43202982	4.303329125	213.0942174	6.926391105	12.8764414	3	3	5	3	1.272510017	-2.229513239	0.319423648	16	32	23.70669167	60.0509	12	8	1	8	6	33	2	2	8	9	8	8	2	0	16	17	0	0	0
C00121	C5H10O5	20	150.1299	150.0528234	40.001	6.7138	53.2852	0	0	0	0	14.82	43.6301415	4.665453792	28.97302773	3.764850702	128.216234	5.575669515	9.19815242	5	4	5	4	4.197358659	-2.302225737	-2.302204276	32	64	12.6405	29.9609	1	16	1	16	1	20	1	1	5	5	5	5	1	0	10	10	0	0	0
C00122	C4H4O4	12	116.0722	116.0109586	41.3904	3.4735	55.136	0	0	0	0	17.98	38.58378669	4.403914702	18.77236567	2.859481834	92.98909892	3.681000742	8.56456904	4	2	6	2	NaN	-5.796658524	-0.040914331	4	4	9.126	24.607	8	2	2	1	4	11	0	0	0	0	8	7	0	0	8	7	0	0	0
C00123	C6H13NO2	22	131.1729	131.0946287	54.9383	9.9893	24.3944	10.678	0	0	0	12.13	44.7742436	4.854521048	28.24603451	3.316121453	136.0376448	6.532361952	9.68416808	3	2	4	3	6.144669101	-1.723433295	-1.72252367	8	8	13.83555339	34.1709	3	2	1	2	4	21	0	0	0	0	9	8	0	0	9	8	0	0	0
C00124	C6H12O6	24	180.1559	180.0633881	40.001	6.7138	53.2852	0	0	0	0	17.68	48.17323637	4.78468161	34.98980607	4.208306582	154.3210058	7.053142769	8.446073576	6	5	6	5	4.219934327	-2.932561057	-2.932539218	64	128	15.15588267	35.9234	1	32	1	32	1	24	1	1	6	6	6	6	1	0	12	12	0	0	0
C00127	C20H32N6O12S2	72	612.631	612.1519619	39.2102	5.2648	31.3391	13.7179	0	10.468	0	79.45	135.5033231	9.216870834	93.2754311	8.253302394	511.3280022	11.06959517	18.457851	14	10	22	12	3.386831564	-16.50796928	-10.38008962	256	19	54.28691218	136.6544	2286	10	1	10	3888	71	0	0	0	0	40	39	0	0	40	39	0	0	0
C00129	C5H12O7P2	26	246.0921	246.0058258	24.4029	4.9149	45.5097	0	25.1725	0	0	103.49	58.12087051	5.637270448	34.60798517	3.968463429	187.1228495	6.796338134	10.79220052	5	3	7	3	NaN	-4.681281958	0.199330721	8	8	19.481282	48.2068	17	2	1	2	1	25	0	0	0	0	14	13	0	0	14	13	0	0	0
C00130	C10H13N4O8P	36	348.206	348.0470999	34.4931	3.7631	36.7585	16.0901	8.8952	0	0	94.97	84.99358787	6.970918916	44.16819909	4.800360152	257.5667811	6.758577253	13.8740114	9	5	11	5	0.857137979	-5.79328964	-2.935320924	256	256	27.7520245	72.2047	276	16	1	16	3	38	3	3	14	15	9	10	1	2	14	15	9	10	0
C00131	C10H16N5O12P3	46	491.1816	491.0008305	24.4527	3.2833	39.0879	14.2582	18.9179	0	0	188.24	103.4565568	8.844994017	51.78468513	4.887551452	342.0809852	7.572019843	17.69256537	13	6	16	7	2.327233927	-9.417136566	-5.551334425	256	13	37.90994751	94.3036	4863	32	1	32	3	48	3	3	14	15	16	17	1	2	21	22	9	10	0
C00132	CH4O	6	32.0419	32.02621475	37.4844	12.5828	49.9327	0	0	0	0	0.12	15.31650239	2.61530106	11.1757555	2.203770952	36.84245237	4.11646272	5.127632651	1	1	1	1	6.649573675	-0.518577069	-0.518577069	2	2	3.208888889	8.2613	1	1	1	1	1	5	0	0	0	0	2	1	0	0	2	1	0	0	0
C00133	C3H7NO2	13	89.0932	89.04767847	40.4432	7.9193	35.9161	15.7214	0	0	0	3.54	29.08404218	3.619833104	22.7200437	2.998930082	84.89127373	5.906529224	6.840748829	3	2	4	3	5.979935795	-2.978508588	-2.977393421	8	8	8.358352083	20.4973	3	2	1	2	4	12	0	0	0	0	6	5	0	0	6	5	0	0	0
C00134	C4H12N2	18	88.1515	88.10004839	54.5003	13.721	0	31.7787	0	0	0	5.6	38.02954175	5.118286346	21.21996704	2.988839714	102.9529186	5.325566781	9.976375811	2	2	2	4	NaN	-6.459955461	-0.845120264	4	4	11.16564768	27.3786	1	1	1	1	1	17	0	0	0	0	6	5	0	0	6	5	0	0	0
C00135	C6H9N3O2	20	155.1546	155.0694765	46.4467	5.8467	20.6238	27.0827	0	0	0	22.33	46.69779015	5.323683838	26.13933237	3.51011088	135.0801394	5.423998406	10.64427393	4	3	5	4	7.690098382	-3.459622233	-3.433925853	32	32	14.77446195	37.4933	24	2	1	2	8	20	1	1	5	5	6	6	0	1	6	6	5	5	0
C00136	C25H42N7O17P3S	95	837.624	837.1570732	35.8475	5.054	32.4716	11.7054	11.0934	3.8281	0	249.39	168.7225713	11.16107594	91.39213551	6.149127014	664.6969	12.51509276	22.12720064	17	9	23	10	2.120196387	-10.64273713	-6.009764727	256	23	72.33715166	181.4359	5000	128	1	128	36	97	3	3	14	15	39	40	1	2	44	45	9	10	0
C00137	C6H12O6	24	180.1559	180.0633881	40.001	6.7138	53.2852	0	0	0	0	13.09	51.33887669	4.441221004	32.97572935	4.425336326	153.6641896	5.777835676	8.328683021	6	6	6	6	4.699313405	-3.7820119	-3.782009652	64	64	15.092376	35.775	1	9	1	9	1	24	1	1	6	6	6	6	1	0	12	12	0	0	1
C00141	C5H8O3	16	116.1152	116.0473441	51.7189	6.9444	41.3367	0	0	0	0	9.38	36.03322561	4.215659186	27.06906453	3.333537152	109.1417273	6.68917946	7.998588066	3	1	5	1	NaN	-1.965814905	1.309396079	8	4	10.62324026	27.1911	5	1	1	1	5	15	0	0	0	0	8	7	0	0	8	7	0	0	0
C00143	C20H23N7O6	56	457.4399	457.1709815	52.5127	5.0679	20.9856	21.4338	0	0	0	80.83	123.4700597	10.70319651	57.83720188	5.305961998	380.5801701	10.90749896	20.65502102	11	6	15	7	3.528239709	-6.900372072	-2.26592247	256	15	42.45265677	123.9566	3197	4	1	4	276	59	4	4	19	21	14	15	2	2	21	24	12	12	1
C00144	C10H14N5O8P	38	363.2206	363.057999	33.0672	3.885	35.239	19.2813	8.5275	0	0	94.46	90.21890227	7.494365139	45.76035792	4.773928854	268.7296779	6.823046823	14.47927206	10	6	12	7	0.393603443	-6.016762171	-3.631871069	256	12	28.92712183	75.494	388	16	1	16	6	40	3	3	14	15	10	11	1	2	15	16	9	10	0
C00147	C5H5N5	15	135.1267	135.0544952	44.4424	3.7296	0	51.828	0	0	0	28.62	44.76989227	4.398592773	22.45986249	3.722241303	107.1571454	3.590383985	8.395367712	4	2	4	3	7.659570261	-0.547100191	-0.53101273	32	32	13.35820451	36.5993	79	1	1	1	8	16	2	2	9	10	1	1	0	2	1	1	9	10	0
C00148	C5H9NO2	17	115.1305	115.0633285	52.1612	7.8793	27.7935	12.1659	0	0	0	13.21	36.18359432	4.456149782	23.36321076	3.085391949	107.7816154	6.056396308	8.676822451	3	2	4	2	7.109300857	-2.705528903	-2.705528903	8	8	11.29415232	28.0643	3	2	1	2	4	17	1	1	5	5	3	3	1	0	8	8	0	0	0
C00149	C4H6O5	15	134.0874	134.0215233	35.8295	4.5102	59.6603	0	0	0	0	5.06	38.90411501	4.701986602	22.35143523	3.014004945	109.3116177	6.041952469	9.377498053	5	3	7	3	NaN	-6.329056535	-1.113641428	32	32	10.12320571	24.8752	9	2	1	2	10	14	0	0	0	0	9	8	0	0	9	8	0	0	0
C00152	C4H8N2O3	17	132.1179	132.0534921	36.3636	6.1033	36.3298	21.2033	0	0	0	9.05	40.59069774	4.782776179	24.55846605	3.066466156	115.1320237	6.439844971	9.159276704	4	3	6	5	5.212420289	-4.437750438	-4.423684486	32	64	11.51092851	28.3549	9	2	1	2	14	16	0	0	0	0	9	8	0	0	9	8	0	0	0
C00153	C6H6N2O	15	122.1246	122.0480128	59.0088	4.952	13.1009	22.9384	0	0	0	20.12	44.35456958	4.721798631	18.8136835	3.314751973	108.0718512	3.4	9.399196398	2	1	3	2	8.508454781	-0.393954414	-0.393786317	8	8	12.27760236	32.9795	22	1	1	1	2	15	1	1	6	6	3	3	0	1	3	3	6	6	0
C00154	C37H66N7O17P3S	131	1005.943	1005.344874	44.177	6.6131	27.0383	9.7468	9.2372	3.1876	0	253.34	226.6292305	18.8902682	102.7291241	7.106441562	868.1397801	12.70295459	36.6700741	17	9	23	10	2.120196387	-5.307913149	-0.674940747	256	23	94.06919179	236.6479	5000	128	1	128	36	133	3	3	14	15	51	52	1	2	56	57	9	10	0
C00155	C4H9NO2S	17	135.185	135.0353992	35.5386	6.7104	23.6704	10.3611	0	23.7193	0	6.73	40.43917645	5.003179599	25.24543233	3.210365873	120.4576569	5.644093686	10.0249646	3	3	4	4	5.912210408	-2.714405753	-2.713096485	16	16	13.23736894	32.935	3	2	1	2	4	16	0	0	0	0	8	7	0	0	8	7	0	0	0
C00156	C7H6O3	16	138.1207	138.0316941	60.8706	4.3785	34.7509	0	0	0	0	18.51	47.17655819	5.042496034	20.33273301	3.4364735	118.176635	3.740345323	9.816919531	3	2	4	2	NaN	-1.244199911	1.327263402	4	4	13.2961862	35.2951	16	1	1	1	1	16	1	1	6	6	4	4	0	1	4	4	6	6	1
C00158	C6H8O7	21	192.1235	192.0270026	37.5093	4.1971	58.2936	0	0	0	0	14.01	48.33991979	4.921465711	32.85762596	3.785643172	154.4720733	7.509961161	9.476785507	7	4	10	4	NaN	-8.634658998	-1.322687452	64	64	14.47954704	35.6239	18	1	1	1	3	20	0	0	0	0	13	12	0	0	13	12	0	0	0
C00159	C6H12O6	24	180.1559	180.0633881	40.001	6.7138	53.2852	0	0	0	0	17.37	46.22948996	4.582601053	35.3485094	4.005049176	154.2958873	6.727536896	9.16450062	6	5	6	5	4.219934327	-2.932561057	-2.932539218	64	128	15.15588267	35.9234	1	32	1	32	1	24	1	1	6	6	6	6	1	0	12	12	0	0	0
C00163	C3H6O2	11	74.0785	74.03677944	48.6404	8.1638	43.1958	0	0	0	0	3.5	28.1351794	3.622459106	18.5520457	2.788341121	72.96525695	4.918908216	7.103652326	2	1	3	1	NaN	-1.74859162	0.477190133	2	4	6.8326756	17.2706	3	1	1	1	2	10	0	0	0	0	5	4	0	0	5	4	0	0	0
C00166	C9H8O3	20	164.158	164.0473441	65.8489	4.912	29.239	0	0	0	0	19.37	50.25502555	5.160272964	31.19078912	3.509492333	145.7852438	6.414746878	10.2987099	3	1	5	1	NaN	-1.3917326	1.900213773	8	4	16.45630534	42.7116	5	1	1	1	2	20	1	1	6	6	6	6	0	1	6	6	6	6	1
C00167	C15H22N2O18P2	59	580.2853	580.0342849	31.0469	3.8213	49.6289	4.8275	10.6754	0	0	155.23	107.3996657	7.549222449	67.15588485	5.621259284	424.8161357	11.43513774	15.08239725	15	9	20	9	NaN	-12.72555514	-4.676333541	256	22	44.32593285	106.3232	1056	2048	1	2048	6	61	3	3	17	17	20	22	2	1	31	33	6	6	0
C00169	CH4NO5P	12	141.0199	140.9827088	8.517	2.859	56.7275	9.9324	21.9641	0	0	44.61	34.05389023	4.210969739	21.71667536	3.083224292	95.00532755	5.596871356	8.340161755	4	3	6	4	NaN	-4.501854539	-1.210756394	8	8	9.282304222	22.4801	13	1	1	1	2	11	0	0	0	0	8	7	0	0	8	7	0	0	0
C00170	C11H15N5O3S	35	297.334	297.0895601	44.4341	5.0849	16.1429	23.5538	0	10.7842	0	52.8	81.32778627	6.706968865	44.3558824	5.211639284	243.4038015	6.791789638	13.33737406	7	3	7	4	8.794655012	-0.614014211	-0.608492726	128	128	28.74894025	74.0292	79	16	1	16	3	37	3	3	14	15	6	7	1	2	11	12	9	10	0
C00178	C5H6N2O2	15	126.1133	126.0429274	47.6187	4.7954	25.3731	22.2129	0	0	0	24.11	42.21132213	4.359423537	21.22160752	3.526347344	105.6026327	4.229044678	8.596207163	2	2	4	2	2.509867958	-0.46014763	-0.459740511	8	8	11.47834206	30.3264	16	1	1	1	6	15	1	1	6	6	3	3	0	1	3	3	6	6	0
C00180	C7H6O2	15	122.1213	122.0367794	68.8454	4.9522	26.2025	0	0	0	0	16.47	45.05189059	4.728520467	18.72639307	3.406257425	109.7271984	3.4	9.431308442	2	1	3	1	NaN	-1.198071011	1.630828724	2	2	12.65447172	33.3142	10	1	1	1	1	15	1	1	6	6	3	3	0	1	3	3	6	6	1
C00181	C5H10O5	20	150.1299	150.0528234	40.001	6.7138	53.2852	0	0	0	0	12.58	44.54882112	4.360312818	28.94026503	3.644164197	128.5668505	5.745505171	8.702570014	5	4	5	4	4.068107334	-2.302225495	-2.302204276	32	64	12.6405	29.9609	1	16	1	16	1	20	1	1	6	6	4	4	1	0	10	10	0	0	0
C00183	C5H11NO2	19	117.1463	117.0789786	51.2637	9.4645	27.3152	11.9566	0	0	0	10.14	38.84570341	4.186330112	26.46602349	3.526258205	119.0555311	5.869506562	8.376318306	3	2	4	3	6.149808941	-2.090414262	-2.08966119	8	8	12.00449256	29.4929	3	2	1	2	4	18	0	0	0	0	8	7	0	0	8	7	0	0	0
C00184	C3H6O3	12	90.0779	90.03169406	40.001	6.7138	53.2852	0	0	0	0	2.93	29.8200698	3.579324478	20.9299824	3.197025515	81.46116606	5.535148464	7.104876707	3	2	4	2	5.200073002	-1.528216424	-1.528216284	32	16	7.705621333	19.5992	2	1	1	1	3	11	0	0	0	0	6	5	0	0	6	5	0	0	0
C00186	C3H6O3	12	90.0779	90.03169406	40.001	6.7138	53.2852	0	0	0	0	3.93	30.8472908	3.77603455	21.5613277	2.97932691	81.54774116	5.424347453	7.296407975	3	2	4	2	0.049788565	-3.515474822	-0.471829518	8	8	7.546188	18.8398	3	2	1	2	4	11	0	0	0	0	6	5	0	0	6	5	0	0	0
C00187	C27H46O	74	386.6535	386.3548661	83.8707	11.9914	4.1379	0	0	0	0	106.22	119.5710459	10.78047607	47.98712541	4.713886563	427.777312	7.221516388	21.29648711	1	1	1	1	8.413368338	7.112889029	7.112889031	2	2	47.97796296	120.6165	1	256	1	256	1	77	4	4	17	20	11	11	4	0	28	31	0	0	4
C00188	C4H9NO3	17	119.1192	119.0582432	40.3317	7.6154	40.2943	11.7586	0	0	0	6.51	36.54317992	3.899395339	26.12590801	3.476236511	110.5082389	5.512652968	7.537966348	4	3	5	4	5.595033514	-3.610955196	-3.60742549	16	16	10.86856056	26.4598	3	4	1	4	6	16	0	0	0	0	8	7	0	0	8	7	0	0	0
C00189	C2H7NO	11	61.0831	61.05276385	39.3258	11.5508	26.1928	22.9306	0	0	0	1.54	26.10185875	3.803499728	17.30603163	2.707324238	65.68360552	4.973585657	7.34052059	2	2	2	3	12.57299806	-3.746800332	-1.315560877	4	4	6.566569529	16.2111	1	1	1	1	1	10	0	0	0	0	4	3	0	0	4	3	0	0	0
C00191	C6H10O7	23	194.1394	194.0426527	37.1198	5.1918	57.6883	0	0	0	0	17.73	47.33215613	4.602907114	35.25370843	4.072293985	156.5817842	6.721363862	8.767555517	7	5	8	5	NaN	-5.95259086	-2.61226468	128	256	15.20994651	35.7908	3	32	1	32	2	23	1	1	6	6	7	7	1	0	13	13	0	0	0
C00197	C3H7O7P	18	186.0572	185.9929391	19.3661	3.7922	60.1943	0	16.6474	0	0	48.03	46.71805284	5.158787523	25.92425917	3.49834584	135.1900388	5.370204439	10.26068019	6	4	8	4	NaN	-7.868095655	-1.642305516	32	32	12.95952067	31.2564	12	2	1	2	4	17	0	0	0	0	11	10	0	0	11	10	0	0	0
C00199	C5H11O8P	25	230.1098	230.0191538	26.0978	4.8183	55.6235	0	13.4604	0	0	53.09	52.69532028	5.375855335	33.75565352	3.685221759	177.7148715	7.778977729	10.33228592	7	5	9	5	NaN	-5.746702785	-2.760262981	256	128	17.37363	42.4722	8	4	1	4	8	24	0	0	0	0	14	13	0	0	14	13	0	0	0
C00203	C17H27N3O17P2	66	607.3537	607.0815695	33.6183	4.4808	44.7828	6.9186	10.1996	0	0	168.71	123.7145574	7.540621255	81.07434435	6.427617123	462.2854456	10.72333616	14.57888361	14	9	19	9	0.461490595	-10.02368718	-5.284643272	256	23	48.47945565	117.5571	1056	2048	1	2048	9	68	3	3	17	17	22	24	2	1	33	35	6	6	0
C00204	C6H10O6	22	178.14	178.0477381	40.4537	5.6581	53.8882	0	0	0	0	11.83	50.65796739	5.225144327	30.45068177	3.701653943	151.9674778	6.392085243	10.21704092	6	4	8	4	0.02346758	-5.200058784	-1.77503124	64	32	14.57012834	36.3163	5	4	1	4	35	21	0	0	0	0	12	11	0	0	12	11	0	0	0
C00206	C10H15N5O9P2	41	411.2017	411.0345001	29.2088	3.6768	35.018	17.0314	15.065	0	0	141.41	93.67021409	8.357525232	46.11873431	4.689874448	297.2474132	7.444653168	16.66482546	11	5	13	6	2.710100347	-6.621752516	-4.676532467	256	12	33.12552249	83.4307	1343	16	1	16	3	43	3	3	14	15	12	13	1	2	17	18	9	10	0
C00207	C3H6O	10	58.0791	58.04186481	62.0397	10.4128	27.5476	0	0	0	0	2.56	24.74083589	3.261817033	18.51950742	2.830295032	64.21221512	4.758528146	6.592095044	1	0	2	0	NaN	0.106279808	0.106279808	8	4	6.329682	16.1948	2	1	1	1	2	9	0	0	0	0	4	3	0	0	4	3	0	0	0
C00208	C12H22O11	45	342.2965	342.1162115	42.1063	6.4782	51.4155	0	0	0	0	44.81	80.49275851	6.795220187	50.24860221	4.820028358	289.4404357	8.287530225	13.16086429	11	8	11	8	4.361030814	-4.703399016	-4.703374864	256	17	28.9697942	68.3367	1	1024	1	1024	1	46	2	2	12	12	11	12	2	0	23	24	0	0	0
C00212	C10H13N5O4	32	267.2413	267.0967539	44.9433	4.9031	23.9475	26.2061	0	0	0	46.19	74.35325811	6.217777283	37.91613641	4.219120549	216.0735696	6.609223267	12.71593791	8	4	8	5	8.781237605	-2.096485308	-2.090963872	256	256	24.54579754	63.1956	79	16	1	16	3	34	3	3	14	15	5	6	1	2	10	11	9	10	0
C00216	C5H10O5	20	150.1299	150.0528234	40.001	6.7138	53.2852	0	0	0	0	12.79	41.63397341	4.086254737	29.81848181	3.806620504	128.6253752	6.162960543	7.926679904	5	4	5	4	4.068107334	-2.302225495	-2.302204276	32	64	12.6405	29.9609	1	16	1	16	1	20	1	1	6	6	4	4	1	0	10	10	0	0	0
C00219	C20H32O2	54	304.4669	304.2402303	78.8966	10.5936	10.5098	0	0	0	0	50.03	104.2562605	9.58877386	46.92589842	5.132112354	331.0151588	7.81233446	19.17321711	2	1	3	1	NaN	4.423095219	6.587170811	2	4	37.14880952	99.954	3	16	16	1	2	53	0	0	0	0	22	21	0	0	22	21	0	0	0
C00221	C6H12O6	24	180.1559	180.0633881	40.001	6.7138	53.2852	0	0	0	0	18.65	45.96979881	4.788563809	33.19442135	3.643281091	154.3418944	6.555493825	9.200764031	6	5	6	5	4.219934327	-2.932561057	-2.932539218	64	128	15.15588267	35.9234	1	32	1	32	1	24	1	1	6	6	6	6	1	0	12	12	0	0	0
C00222	C3H4O3	10	88.0621	88.01604399	40.9167	4.5783	54.5049	0	0	0	0	2.46	29.1399108	3.825492655	19.52103021	2.726476456	75.19601666	4.886166535	7.511076586	3	1	5	1	NaN	-3.548649021	-0.489733521	8	8	7.024708174	18.0624	6	1	1	1	4	9	0	0	0	0	6	5	0	0	6	5	0	0	0
C00223	C30H42N7O18P3S	101	913.677	913.1519878	39.4364	4.6333	31.5198	10.731	10.17	3.5094	0	290.27	190.7312169	13.16992064	93.55215511	6.950839625	720.2920515	12.60595192	26.16198249	18	10	24	11	2.120196202	-9.500256313	-4.865669269	256	25	80.41065991	204.6051	4378	256	2	128	36	104	4	4	20	21	39	41	1	3	44	46	15	16	1
C00224	C10H14N5O10PS	41	427.284	427.0198989	28.1094	3.3025	37.4444	16.3904	7.249	7.5044	0	131.93	95.79424084	7.772344642	52.45097439	5.252730614	306.0631318	7.880554244	15.44181522	12	5	15	6	2.553289661	-7.211246244	-6.674094673	256	13	34.25042381	84.0603	2291	32	1	32	3	43	3	3	14	15	13	14	1	2	18	19	9	10	0
C00230	C7H6O4	17	154.1201	154.0266087	54.5515	3.924	41.5245	0	0	0	0	20.65	49.30607758	5.036239106	22.43548275	3.601676151	126.6625424	4.446340199	10.0613906	4	3	5	3	NaN	-1.73757484	1.023698081	8	8	13.96582105	37.276	48	1	1	1	1	17	1	1	6	6	5	5	0	1	5	5	6	6	1
C00231	C5H11O8P	25	230.1098	230.0191538	26.0978	4.8183	55.6235	0	13.4604	0	0	53.25	53.33119975	5.490249846	33.69093005	3.742919396	177.6913262	6.734264053	10.49557661	7	5	9	5	NaN	-5.746702785	-2.760262981	256	128	17.37363	42.4722	8	4	1	4	8	24	0	0	0	0	14	13	0	0	14	13	0	0	0
C00232	C4H6O3	13	102.0886	102.0316941	47.0599	5.9239	47.0162	0	0	0	0	4.77	33.70190157	4.35413773	20.19890774	2.687272874	92.24025232	5.44865471	8.888695887	3	1	5	1	NaN	-3.343909241	-0.55709922	8	16	8.816896296	22.6116	6	1	1	1	8	12	0	0	0	0	7	6	0	0	7	6	0	0	0
C00233	C6H10O3	19	130.1418	130.0629942	55.3736	7.7449	36.8815	0	0	0	0	11.66	40.68694843	4.736025252	27.76345512	3.275137059	126.1650358	6.554952168	9.383486045	3	1	5	1	NaN	-1.700885251	1.497997562	8	4	12.43888663	31.7662	5	1	1	1	10	18	0	0	0	0	9	8	0	0	9	8	0	0	0
C00234	C20H23N7O7	57	473.4393	473.1658961	50.7381	4.8966	23.6558	20.7095	0	0	0	82.32	118.6860455	11.02653011	61.69942103	5.558012939	394.6849088	11.71625149	21.77377631	12	7	17	8	4.737872593	-8.751581192	-4.895208547	256	16	43.29615153	124.6812	3690	4	1	4	276	59	3	3	16	17	18	19	1	2	22	24	12	12	1
C00235	C5H12O7P2	26	246.0921	246.0058258	24.4029	4.9149	45.5097	0	25.1725	0	0	104.61	58.19668189	5.964134279	34.01675817	4.046037529	186.8406449	6.925219873	11.88600869	5	3	7	3	NaN	-4.583957794	0.297304511	8	8	19.481282	49.1253	17	2	1	2	1	25	0	0	0	0	14	13	0	0	14	13	0	0	0
C00236	C3H8O10P2	23	266.0371	265.9592695	13.544	3.031	60.1397	0	23.2853	0	0	89.59	58.45970056	5.957713246	33.44484275	3.852185143	179.9805656	5.888348839	11.88559399	8	5	11	5	NaN	-8.522284339	-2.296170662	64	64	17.80750694	42.4161	36	2	1	2	1	22	0	0	0	0	15	14	0	0	15	14	0	0	0
C00239	C9H14N3O7P	34	307.1971	307.0569363	35.1879	4.5935	36.4573	13.6785	10.0827	0	0	78.01	77.61281993	6.728154487	43.84087283	5.069823828	237.5368277	6.666188548	13.06779514	8	4	10	5	1.25611548	-5.200535446	-2.681518797	128	64	25.3478241	63.907	72	8	1	8	3	35	2	2	11	11	9	10	1	1	14	15	6	6	0
C00242	C5H5N5O	16	151.1261	151.0494098	39.7373	3.3348	10.5868	46.3411	0	0	0	31.39	47.85890731	4.93090798	23.28699332	3.927759788	114.6928794	3.493286494	9.800663757	4	3	5	4	5.76506614	-1.147887122	-1.146267054	32	32	13.09921701	38.0248	97	1	1	1	15	17	2	2	9	10	2	2	0	2	2	2	9	10	0
C00245	C2H7NO3S	14	125.147	125.0146638	19.1945	5.6378	38.3535	11.1922	0	25.6219	0	36.69	35.36067734	4.41502217	23.80337378	3.092268558	101.6017684	5.991868638	8.159413536	4	2	6	3	3.793941022	-2.847439734	-2.845623993	4	8	10.72544297	24.6051	5	1	1	1	10	13	0	0	0	0	7	6	0	0	7	6	0	0	0
C00247	C6H12O6	24	180.1559	180.0633881	40.001	6.7138	53.2852	0	0	0	0	17.57	46.75769783	4.50282854	32.03770814	4.044014602	154.3745989	6.384890143	8.595777243	6	5	6	5	3.664244243	-2.758221244	-2.757999318	64	128	15.15588267	36.3608	1	16	1	16	1	24	1	1	6	6	6	6	1	0	12	12	0	0	0
C00248	C8H15NOS2	27	205.341	205.0595055	46.7932	7.3629	7.7916	6.8212	0	31.231	0	35.38	66.21253957	6.750270755	30.24072766	3.498183964	187.2148674	6.579220287	13.23412228	1	1	2	2	7.943407054	1.306836782	1.306836794	4	4	22.11434325	56.1936	3	2	1	2	3	27	1	1	5	5	7	7	1	0	12	12	0	0	0
C00249	C16H32O2	50	256.4241	256.2402303	74.9427	12.5784	12.4789	0	0	0	0	27.87	102.9670766	12.05139434	33.65057198	3.999683736	293.8012199	5.661573405	23.91371849	2	1	3	1	NaN	4.218831327	6.256582778	2	4	30.713764	77.0836	3	1	1	1	2	49	0	0	0	0	18	17	0	0	18	17	0	0	0
C00250	C8H9NO3	21	167.162	167.0582432	57.4805	5.4267	28.7136	8.3791	0	0	0	29.18	53.38843391	4.991337583	27.42294092	3.944454189	148.0167752	5.893462946	10.10334527	4	2	5	2	6.035122983	0.134703908	0.178530814	16	8	16.20816035	43.8734	27	1	1	1	3	21	1	1	6	6	6	6	0	1	6	6	6	6	0
C00251	C10H10O6	26	226.1828	226.0477381	53.1017	4.4563	42.442	0	0	0	0	37.62	64.37166452	6.211489102	33.44458329	3.991509644	186.5174827	6.311360106	12.34257779	6	3	8	3	NaN	-6.163967821	-0.125490597	16	16	20.22141614	54.3101	49	4	1	4	4	26	1	1	6	6	10	10	1	0	16	16	0	0	1
C00253	C6H5NO2	14	123.1094	123.0320284	58.5367	4.0937	25.9922	11.3774	0	0	0	16.01	43.29152531	4.71625013	18.61172781	3.353883325	105.5142452	3.4	9.372528974	3	1	4	1	4.006189113	-2.659144162	-0.190375148	4	4	11.79307914	31.1573	22	1	1	1	1	14	1	1	6	6	3	3	0	1	3	3	6	6	0
C00254	C10H10O6	26	226.1828	226.0477381	53.1017	4.4563	42.442	0	0	0	0	28.29	54.4806753	5.259917951	41.84040582	4.689091836	187.3032877	6.83212921	9.247149488	6	3	9	3	0.367198829	-6.374022545	0.060970453	32	16	19.87846292	53.554	15	2	1	2	2	26	1	1	6	6	10	10	1	0	16	16	0	0	1
C00255	C17H20N4O6	47	376.3639	376.1382844	54.2512	5.3562	25.5063	14.8863	0	0	0	70.95	110.4564835	7.503872502	49.02476118	6.279316033	320.7740387	5.899646169	15.01021484	9	5	11	5	2.30424102	-1.227585735	-0.91654026	256	128	35.49111364	96.2684	474	8	1	8	3	49	3	3	14	16	13	13	0	3	13	13	14	16	1
C00256	C3H6O3	12	90.0779	90.03169406	40.001	6.7138	53.2852	0	0	0	0	3.93	30.78379805	3.781157732	21.93584195	3.043539677	81.50047279	5.469608156	7.104491875	3	2	4	2	0.049788565	-3.515474822	-0.471829518	8	8	7.546188	18.8398	3	2	1	2	4	11	0	0	0	0	6	5	0	0	6	5	0	0	0
C00257	C6H12O7	25	196.1553	196.0583027	36.7383	6.1662	57.0955	0	0	0	0	14.89	54.00050887	5.501797927	30.92556222	3.65527812	167.2159526	6.507515969	10.88442321	7	6	8	6	0.279652988	-6.67750472	-3.409744311	128	128	15.82152015	38.271	3	16	1	16	11	24	0	0	0	0	13	12	0	0	13	12	0	0	0
C00258	C3H6O4	13	106.0773	106.0266087	33.9678	5.7012	60.3311	0	0	0	0	4.15	33.49380699	4.231845057	21.7425937	3.034747891	90.09748247	5.404890638	7.692508492	4	3	5	3	0.186678935	-4.772478609	-1.518739485	16	16	8.279054	20.3835	3	2	1	2	5	12	0	0	0	0	7	6	0	0	7	6	0	0	0
C00259	C5H10O5	20	150.1299	150.0528234	40.001	6.7138	53.2852	0	0	0	0	12.79	42.37633491	4.151318248	29.79803249	3.657219282	128.6265819	5.862078781	7.927036379	5	4	5	4	4.068107334	-2.302225495	-2.302204276	32	64	12.6405	29.9609	1	16	1	16	1	20	1	1	6	6	4	4	1	0	10	10	0	0	0
C00262	C5H4N4O	14	136.1115	136.0385108	44.1208	2.9621	11.7546	41.1624	0	0	0	31.33	43.18422074	4.40164911	21.33254119	3.493456369	103.7671054	3.400000008	8.759270855	3	2	4	2	4.95286725	-0.923556184	-0.918586895	16	16	11.92968384	34.7355	69	1	1	1	8	15	2	2	9	10	1	1	0	2	1	1	9	10	0
C00263	C4H9NO3	17	119.1192	119.0582432	40.3317	7.6154	40.2943	11.7586	0	0	0	6.02	37.28856501	4.750804117	23.56405568	3.109758186	110.524602	5.841131572	9.309264092	4	3	5	4	5.685271006	-3.966747986	-3.964299079	16	16	10.86856056	26.9064	3	2	1	2	4	16	0	0	0	0	8	7	0	0	8	7	0	0	0
C00266	C2H4O2	8	60.052	60.02112937	40.001	6.7138	53.2852	0	0	0	0	1.64	21.8151558	3.31765244	15.66169674	2.403665735	56.04805237	4.565738048	6.232355203	2	1	3	1	5.549051248	-1.199210038	-1.199210013	8	4	5.190642	13.4205	2	1	1	1	2	7	0	0	0	0	4	3	0	0	4	3	0	0	0
C00267	C6H12O6	24	180.1559	180.0633881	40.001	6.7138	53.2852	0	0	0	0	17.54	46.03248392	4.7993741	35.34510083	4.079193534	154.3467404	6.584168408	9.546218425	6	5	6	5	4.219934327	-2.932561057	-2.932539218	64	128	15.15588267	35.9234	1	32	1	32	1	24	1	1	6	6	6	6	1	0	12	12	0	0	0
C00275	C6H13O9P	29	260.1358	260.0297185	27.7025	5.0371	55.3536	0	11.9068	0	0	58.93	64.23475553	5.876424884	37.91535049	4.485291783	199.2322257	6.857985074	11.04151402	8	6	9	6	NaN	-6.244320586	-3.056105249	128	256	19.793746	46.7963	4	32	1	32	1	29	1	1	6	6	10	10	1	0	16	16	0	0	0
C00279	C4H9O7P	21	200.0838	200.0085892	24.0113	4.5338	55.9744	0	15.4804	0	0	51.04	51.76171757	5.613110739	25.45468779	3.342872368	152.3879239	6.261020686	11.05183885	6	4	8	4	NaN	-5.416910141	-2.43125671	64	64	14.86296015	36.2935	8	4	1	4	6	20	0	0	0	0	12	11	0	0	12	11	0	0	0
C00280	C19H26O2	47	286.4085	286.1932801	79.6776	9.15	11.1724	0	0	0	0	80.06	80.72426667	6.580470142	44.30789228	4.463033199	286.7827192	7.137830968	13.10099815	2	0	4	0	7.072692574	3.928951003	3.928951003	32	16	32.71219292	83.6075	6	32	1	32	10	50	4	4	17	20	4	4	4	0	21	24	0	0	4
C00286	C10H16N5O13P3	47	507.181	506.9957452	23.6813	3.1797	41.0095	13.8084	18.3211	0	0	190.49	106.6112312	9.371929017	50.03343953	4.880452483	349.6542157	8.114761223	18.35383119	13	7	17	8	1.128098025	-9.997183194	-3.773596413	256	12	37.79141383	95.7291	4860	32	1	32	6	49	3	3	14	15	17	18	1	2	22	23	9	10	0
C00292	C6H7N	14	93.1265	93.05784923	77.3831	7.5763	0	15.0405	0	0	0	12.77	38.77566359	4.063874864	19.19353475	3.40537226	93.00960242	3.567517347	8.104432736	1	1	1	2	NaN	1.142431136	1.144319862	2	2	11.49776326	30.7584	5	1	1	1	1	14	1	1	6	6	1	1	0	1	1	1	6	6	1
C00294	C10H12N4O5	31	268.2261	268.0807695	44.7783	4.5094	29.8245	20.8879	0	0	0	49.75	73.45958838	6.195836487	37.18375813	4.60228057	212.5402804	6.258905041	12.5319822	7	4	8	4	4.759847552	-2.482990806	-2.478538037	128	128	23.15659671	61.3318	69	16	1	16	3	33	3	3	14	15	5	6	1	2	10	11	9	10	0
C00295	C5H4N2O4	15	156.0963	156.0171066	38.4721	2.5829	40.9988	17.9462	0	0	0	23.07	47.80924234	4.711022036	24.30018678	3.754359676	116.4236583	3.478514663	9.007898619	4	3	7	3	NaN	-4.668998504	-1.227664501	32	16	12.2210978	33.2746	51	1	1	1	6	15	1	1	6	6	5	5	0	1	5	5	6	6	0
C00299	C9H12N2O6	29	244.2014	244.0695361	44.2652	4.953	39.3103	11.4714	0	0	0	40.22	67.07247072	5.638624255	36.71781771	4.393477048	197.893764	6.303693793	11.2025022	6	4	8	4	3.421793137	-2.416096486	-2.415242142	64	128	20.90134513	52.5656	16	16	1	16	3	30	2	2	11	11	6	7	1	1	11	12	6	6	0
C00301	C15H23N5O14P2	59	559.3157	559.0716735	32.2109	4.1448	40.0474	12.5213	11.0756	0	0	170.63	112.1101613	7.486859423	72.36565764	6.240679483	415.0631496	8.974473474	13.21485228	15	8	17	9	2.909135541	-8.781713379	-6.881417695	256	19	45.30645207	111.1233	1738	1024	1	1024	3	62	4	4	19	20	17	19	2	2	27	29	9	10	0
C00302	C5H9NO4	19	147.1293	147.0531578	40.8168	6.1656	43.4975	9.52	0	0	0	7.85	43.10109097	4.986536565	25.55220625	3.243935728	129.6218444	6.914069682	9.595154546	5	3	7	4	2.796241152	-5.998483559	-3.376775941	16	32	12.69048005	31.2877	9	2	1	2	16	18	0	0	0	0	10	9	0	0	10	9	0	0	0
C00307	C14H26N4O11P2	57	488.324	488.1073307	34.4341	5.3666	36.0403	11.4733	12.6857	0	0	164.31	113.0624305	8.528488184	57.90064023	5.419787976	391.0693337	9.305709341	17.26137141	10	4	14	5	2.418519228	-5.112727619	-6.523034533	256	256	41.38670556	113.5839	306	64	1	64	3	58	2	2	11	11	20	21	1	1	25	26	6	6	0
C00310	C5H10O5	20	150.1299	150.0528234	40.001	6.7138	53.2852	0	0	0	0	15.94	40.83448872	4.539590241	28.46737725	3.542913174	128.3044994	6.110659134	8.988176835	5	4	5	4	3.587805515	-2.127885481	-2.127664376	32	64	12.6405	30.3983	1	8	1	8	1	20	1	1	5	5	5	5	1	0	10	10	0	0	0
C00311	C6H8O7	21	192.1235	192.0270026	37.5093	4.1971	58.2936	0	0	0	0	10.68	47.70640804	5.417788876	33.46725688	3.907378388	154.2785576	5.984984891	10.76891926	7	4	10	4	NaN	-8.738139193	-1.44632825	128	128	14.47954704	35.7161	27	4	1	4	33	20	0	0	0	0	13	12	0	0	13	12	0	0	0
C00312	C5H10O5	20	150.1299	150.0528234	40.001	6.7138	53.2852	0	0	0	0	16.32	40.95182655	4.38022737	29.67283658	3.445655573	128.3542885	6.795369385	7.963062385	5	4	5	4	3.587805515	-2.127885481	-2.127664376	32	64	12.6405	30.3983	1	8	1	8	1	20	1	1	5	5	5	5	1	0	10	10	0	0	0
C00314	C8H11NO3	23	169.1778	169.0738932	56.7956	6.5537	28.3715	8.2793	0	0	0	24.73	54.40889235	5.004442362	30.06895576	4.124338228	154.2465758	5.843384273	10.14646837	4	3	4	3	7.492246527	-0.96982088	-0.951321298	16	16	16.7562743	44.1053	12	1	1	1	1	23	1	1	6	6	6	6	0	1	6	6	6	6	0
C00315	C7H19N3	29	145.2459	145.1578976	57.8845	13.1851	0	28.9303	0	0	0	12.02	60.04268848	7.649515549	24.09322634	3.234870332	166.4400434	5.341173926	15.11218234	3	3	3	5	NaN	-8.491534154	-1.14956394	8	8	18.2248898	44.9684	1	1	1	1	1	28	0	0	0	0	10	9	0	0	10	9	0	0	0
C00319	C18H37NO2	58	299.4919	299.2824294	72.1865	12.4524	10.6844	4.6768	0	0	0	35.65	111.2946124	11.52365274	37.70477715	4.519473573	338.4766612	7.852172157	23.0742886	3	3	3	4	11.64927765	2.393707777	4.566580049	8	8	36.42444688	91.892	1	8	2	4	1	57	0	0	0	0	21	20	0	0	21	20	0	0	0
C00322	C6H8O5	19	160.1247	160.0371734	45.005	5.0358	49.9592	0	0	0	0	10.31	47.8724178	5.528749325	26.14391659	3.2748486	136.7315124	5.620459722	11.01352243	5	2	8	2	NaN	-5.980950617	0.335305365	16	16	13.16304171	33.484	15	1	1	1	20	18	0	0	0	0	11	10	0	0	11	10	0	0	0
C00323	C30H42N7O19P3S	102	929.676	929.1469024	38.7577	4.5536	32.6983	10.5464	9.995	3.4491	0	269.81	192.5573725	13.11382512	94.36226776	6.923575534	727.737481	12.5578216	26.14046094	19	11	25	12	2.120196095	-9.804771304	-5.169291338	256	27	81.1030159	206.586	5000	256	2	128	36	105	4	4	20	21	40	42	1	3	45	47	15	16	1
C00327	C6H13N3O3	25	175.1857	175.0956913	41.1359	7.4796	27.3985	23.986	0	0	0	15.54	57.99546454	6.641856143	26.1351248	3.511846424	160.8587358	5.843827836	13.23031366	4	4	6	6	5.74633878	-4.070632116	-4.06853993	64	64	16.29889536	41.329	12	2	1	2	12	24	0	0	0	0	12	11	0	0	12	11	0	0	0
C00328	C10H12N2O3	27	208.2139	208.0847923	57.6844	5.8091	23.0524	13.4541	0	0	0	30.65	65.52525137	6.104776225	31.81351476	4.351147923	186.0323986	5.348678262	12.16020715	5	3	7	5	6.103061457	-2.047985265	-2.044776063	64	32	20.95849886	55.0502	51	2	1	2	10	27	1	1	6	6	9	9	0	1	9	9	6	6	1
C00329	C6H13NO5	25	179.1711	179.0793725	40.2209	7.3132	44.6484	7.8175	0	0	0	18.47	47.85622676	4.856943268	35.1457091	4.09981942	157.6814164	6.594213397	9.58486857	6	5	6	6	9.968397069	-4.290092836	-3.039421015	64	64	15.95933504	37.5809	1	32	1	32	1	25	1	1	6	6	6	6	1	0	12	12	0	0	0
C00330	C10H13N5O4	32	267.2413	267.0967539	44.9433	4.9031	23.9475	26.2061	0	0	0	49.1	75.44277094	6.716805096	36.211459	4.106041106	214.9983286	5.992613346	12.82218889	7	4	8	5	5.985482042	-1.805849644	-1.805580133	128	128	23.62018692	63.1104	97	8	1	8	6	34	3	3	14	15	5	6	1	2	10	11	9	10	0
C00331	C11H9NO3	24	203.1941	203.0582432	65.0204	4.4644	23.6218	6.8933	0	0	0	34.22	60.02314361	5.467442083	37.2884647	4.211719676	172.5052935	6.793850032	10.85749251	3	2	5	2	NaN	-1.217659008	1.998975766	16	8	21.63151691	53.7981	130	1	1	1	2	25	2	2	9	10	6	6	0	2	6	6	9	10	1
C00332	C25H40N7O18P3S	94	851.607	851.1363377	35.2589	4.7343	33.8171	11.5132	10.9113	3.7652	0	254.32	173.5289679	11.71769237	101.3404949	7.574061209	666.4889848	13.60364882	23.40647128	18	9	25	10	2.120196377	-11.56617996	-6.933015272	256	24	72.52282572	182.1032	5000	128	1	128	108	96	3	3	14	15	40	41	1	2	45	46	9	10	0
C00333	C6H10O7	23	194.1394	194.0426527	37.1198	5.1918	57.6883	0	0	0	0	18.04	48.9363084	4.596553342	34.67592263	4.088807039	156.5547186	7.291115797	8.584871488	7	5	8	5	NaN	-5.95259086	-2.61226468	128	256	15.20994651	35.7908	3	32	1	32	2	23	1	1	6	6	7	7	1	0	13	13	0	0	0
C00334	C4H9NO2	16	103.1198	103.0633285	46.5893	8.797	31.0307	13.5829	0	0	0	5.35	38.36405452	4.94514015	21.23355669	2.856869283	101.8332617	5.392146792	9.696154657	3	2	4	3	7.076857248	-3.119862264	-3.119862264	4	8	10.17799779	25.4578	3	1	1	1	2	15	0	0	0	0	7	6	0	0	7	6	0	0	0
C00337	C5H6N2O4	17	158.1121	158.0327567	37.9816	3.8249	40.4761	17.7174	0	0	0	23.44	42.91591304	4.605824259	29.17229792	3.75605445	123.1536823	6.22448924	9.185925074	4	3	7	3	NaN	-4.836884961	-1.523268135	128	32	12.47844078	31.5754	27	2	1	2	35	17	1	1	6	6	5	5	1	0	11	11	0	0	0
C00341	C10H20O7P2	39	314.2091	314.068426	38.2252	6.4157	35.6437	0	19.7154	0	0	118.3	80.82345109	8.567751549	35.89936776	3.748591109	264.1184181	6.771953813	16.99551535	5	3	7	3	NaN	-2.924243544	1.957018786	8	8	28.21377166	72.9279	17	4	2	2	1	38	0	0	0	0	19	18	0	0	19	18	0	0	0
C00345	C6H13O10P	30	276.1352	276.0246331	26.0974	4.7452	57.9405	0	11.2169	0	0	57.47	60.53880849	5.133041055	44.43572678	4.770344826	212.020648	8.646838122	10.52650929	9	7	11	7	NaN	-9.688907332	-3.533310342	256	256	20.47864178	49.1439	12	16	1	16	10	29	0	0	0	0	17	16	0	0	17	16	0	0	0
C00346	C2H8NO4P	16	141.063	141.0190943	17.0288	5.7163	45.3681	9.9294	21.9574	0	0	45.21	38.43593776	4.858904484	23.23946114	3.021773468	110.6761628	6.400837009	9.656543645	4	3	5	4	3.692568263	-2.608381637	-2.783463812	8	8	11.11698816	27.084	4	1	1	1	1	15	0	0	0	0	8	7	0	0	8	7	0	0	0
C00352	C6H14NO8P	30	259.151	259.0457029	27.8078	5.4451	49.3902	5.4048	11.952	0	0	59.55	66.79227117	5.920204036	37.05242775	4.582811259	202.6300382	7.17053429	11.59501122	8	6	9	7	3.573522568	-5.756174269	-5.476681145	128	128	20.56254356	48.4538	4	32	1	32	1	30	1	1	6	6	10	10	1	0	16	16	0	0	0
C00353	C20H36O7P2	65	450.4432	450.1936265	53.3284	8.0556	24.8635	0	13.7526	0	0	153.37	125.060792	12.06091638	67.41371991	6.264781395	418.4533171	8.515472509	23.4606664	5	3	7	3	NaN	0.395185006	5.276447336	8	8	45.93698387	120.5331	17	16	8	2	1	64	0	0	0	0	29	28	0	0	29	28	0	0	0
C00354	C6H14O12P2	34	340.1157	339.9960489	21.1881	4.1489	56.4493	0	18.2137	0	0	106.48	70.91821678	6.805415181	46.23044863	4.750606544	243.799867	8.200505065	13.14861115	10	7	12	7	NaN	-9.431832069	-3.005131381	256	12	24.46880327	58.1066	16	16	1	16	1	34	1	1	5	5	15	15	1	0	20	20	0	0	0
C00356	C27H44N7O20P3S	102	911.659	911.1574671	35.5713	4.8647	35.0995	10.7548	10.1925	3.5172	0	249.64	190.6280436	13.26094623	103.9212626	7.559618222	718.3472602	10.04140494	25.68662986	20	11	27	12	2.102235495	-15.09625052	-7.682960645	256	26	77.3900523	193.702	5000	256	1	256	72	104	3	3	14	15	44	45	1	2	49	50	9	10	0
C00357	C8H16NO9P	35	301.1877	301.0562676	31.9022	5.3545	47.8089	4.6505	10.2839	0	0	64.2	76.68871785	7.23980621	38.96986311	4.379369071	238.2857545	7.583306216	14.4664692	8	6	10	6	0.217813685	-6.532150482	-3.344140443	256	256	24.0037282	57.8976	12	32	1	32	3	35	1	1	6	6	13	13	1	0	19	19	0	0	0
C00360	C10H14N5O6P	36	331.2218	331.0681697	36.2618	4.2603	28.9825	21.144	9.3514	0	0	89.96	83.21668891	7.218681838	42.6224168	4.847242001	252.3825838	6.65144709	14.22907224	9	4	10	5	3.843718841	-4.499692769	-4.320050226	256	256	28.37536023	72.5578	316	8	1	8	3	38	3	3	14	15	8	9	1	2	13	14	9	10	0
C00361	C10H15N5O10P2	42	427.2011	427.0294147	28.1149	3.5391	37.4517	16.3936	14.5008	0	0	142.51	96.26180693	8.774773144	45.30646003	4.680509699	304.8685737	7.449216056	17.31786317	11	6	14	7	1.505935711	-7.231556551	-2.937160318	256	11	32.9840269	84.8562	1649	16	1	16	6	44	3	3	14	15	13	14	1	2	18	19	9	10	0
C00362	C10H14N5O7P	37	347.2212	347.0630843	34.5909	4.064	32.2549	20.1697	8.9205	0	0	92.86	87.19646877	7.719847487	41.34770586	4.744330032	259.8919409	6.671922425	15.37935742	9	5	11	6	0.408348629	-5.110131985	-2.738005192	256	256	28.19917467	73.9833	388	8	1	8	6	39	3	3	14	15	9	10	1	2	14	15	9	10	0
C00363	C10H16N2O11P2	41	402.1884	402.0229324	29.8634	4.0098	43.7589	6.9652	15.4026	0	0	136.6	91.39010332	7.584956871	49.07038782	5.20457276	295.9153142	8.343896378	14.80662167	9	5	13	5	NaN	-6.545882648	-1.6644181	128	128	31.34730531	77.1578	272	16	1	16	3	42	2	2	11	11	14	15	1	1	19	20	6	6	0
C00364	C10H15N2O8P	36	322.2085	322.056602	37.2762	4.6923	39.7243	8.6942	9.613	0	0	87.99	81.48083749	6.46382745	46.63077579	5.242171825	251.0443905	7.097115105	12.89328121	7	4	10	4	NaN	-4.42317889	-1.242619621	64	64	26.56731467	66.2849	64	8	1	8	3	37	2	2	11	11	10	11	1	1	15	16	6	6	0
C00365	C9H13N2O8P	33	308.1819	308.0409519	35.0755	4.2518	41.5324	9.0899	10.0505	0	0	83.84	76.10312512	6.48055627	42.24507395	4.84000434	234.1261726	6.693738569	12.92850121	7	4	10	4	NaN	-4.819103752	-1.63817011	64	64	24.7779081	61.9278	64	8	1	8	3	34	2	2	11	11	9	10	1	1	14	15	6	6	0
C00371	C10H13N5O	29	219.2431	219.1120101	54.7826	5.9766	7.2976	31.9433	0	0	0	46.67	69.50086002	7.008272955	33.31590034	4.28321143	193.398296	5.961904067	14.08634916	5	3	5	3	7.590117686	-0.162016234	-0.148833716	64	64	22.93416915	62.9856	79	2	2	1	8	30	2	2	9	10	7	7	0	2	7	7	9	10	0
C00376	C20H28O	49	284.4357	284.2140155	84.4528	9.9222	5.625	0	0	0	0	96.35	94.73338931	8.646547229	46.03317331	4.612094031	304.6889613	7.411869671	17.16782685	1	0	2	0	NaN	4.855751459	4.855751459	2	4	35.792796	96.8654	28	16	16	1	6	49	1	1	6	6	15	15	1	0	21	21	0	0	1
C00378	C12H17N4OS	35	265.355	265.1123069	54.3153	6.4574	6.0294	21.1139	0	12.0838	0	49.88	73.09467287	7.089854875	44.06996332	4.253780645	238.395401	8.001641171	14.09470252	4	2	4	3	NaN	-3.111880616	-3.097412649	64	32	26.83398256	73.3997	180	1	1	1	3	36	2	2	11	11	7	8	0	2	7	8	11	11	0
C00379	C5H12O5	22	152.1458	152.0684735	39.471	7.9498	52.5792	0	0	0	0	10.1	47.86684991	5.148303706	26.06506431	3.385194581	139.4167384	6.344026139	10.37800445	5	5	5	5	5.071891124	-3.09968466	-3.099683907	32	32	13.26117776	32.4411	1	4	1	4	1	21	0	0	0	0	10	9	0	0	10	9	0	0	0
C00380	C4H5N3O	13	111.102	111.0432618	43.2421	4.5361	14.4006	37.8212	0	0	0	14.55	38.73357876	4.085863292	20.72986579	3.431633827	92.06744694	3.466369833	7.938968706	3	2	4	3	12.49364026	-1.24098145	-1.237566143	16	8	10.26482759	27.9485	18	1	1	1	6	13	1	1	6	6	2	2	0	1	2	2	6	6	0
C00381	C25H44O	70	360.6163	360.339216	83.2651	12.2982	4.4367	0	0	0	0	108.83	127.9001594	10.56819826	66.43573589	5.538487064	415.751086	10.953723	21.84738471	1	1	1	1	7.606971092	7.731198142	7.731198142	2	2	46.55616127	121.8939	1	16	8	2	1	69	0	0	0	0	26	25	0	0	26	25	0	0	0
C00385	C5H4N4O2	15	152.1109	152.0334254	39.4801	2.6505	21.0365	36.8329	0	0	0	37.12	46.16142138	4.669044828	23.00448234	3.834300221	111.3145567	3.400000009	9.274020232	3	3	5	3	3.61552741	-0.247962407	-0.207063792	32	16	12.51974357	36.9219	92	1	1	1	15	16	2	2	9	10	2	2	0	2	2	2	9	10	0
C00387	C10H13N5O5	33	283.2407	283.0916686	42.4046	4.6262	28.2435	24.7258	0	0	0	49.08	76.82627538	6.604309336	37.93282902	4.571614527	223.6073266	6.379092926	13.22370374	8	5	9	6	5.9689276	-2.70648942	-2.706218196	256	256	24.32823494	64.6211	97	16	1	16	6	35	3	3	14	15	6	7	1	2	11	12	9	10	0
C00388	C5H9N3	17	111.1451	111.0796473	54.0316	8.1618	0	37.8065	0	0	0	18.95	39.49238756	4.721769965	23.16893399	3.078762102	107.1445476	5.446014984	9.569202473	2	2	2	3	12.01354198	-3.202285029	-0.700971144	8	8	12.27242056	31.6634	8	1	1	1	2	17	1	1	5	5	3	3	0	1	3	3	5	5	0
C00390	C19H28O4	51	320.4232	320.1987594	71.2193	8.8078	19.9728	0	0	0	0	69.55	97.81399818	8.012655062	57.79348302	4.894082043	322.649484	9.166227811	15.05589604	4	2	4	2	3.037451593	4.952241746	4.952475305	16	16	36.27060698	96.0328	26	2	2	1	1	51	1	1	6	6	17	17	0	1	17	17	6	6	1
C00399	C19H26O4	49	318.4073	318.1831093	71.6702	8.2305	20.0993	0	0	0	0	78.34	90.27436636	7.318878418	61.27589504	5.274709034	314.8665753	10.71191034	14.57064436	4	0	6	0	NaN	3.878414091	3.878414091	4	2	35.55735823	96.1844	33	2	2	1	9	49	1	1	6	6	17	17	1	0	23	23	0	0	1
C00406	C31H44N7O19P3S	105	943.703	943.1625525	39.4543	4.6995	32.2123	10.3896	9.8465	3.3978	0	276.94	194.1114341	13.1376689	96.8598163	6.738479877	745.2120748	12.62212152	25.91548718	19	10	25	11	2.120196402	-9.656861507	-5.023340524	256	26	82.97515831	211.0683	5000	256	2	128	36	108	4	4	20	21	41	43	1	3	46	48	15	16	1
C00407	C6H13NO2	22	131.1729	131.0946287	54.9383	9.9893	24.3944	10.678	0	0	0	13.97	44.23146266	4.861899339	28.8462485	3.623730409	136.1073913	5.954035399	9.692124314	3	2	4	3	6.185389463	-1.645595665	-1.64485514	8	8	13.83555339	34.0939	3	4	1	4	4	21	0	0	0	0	9	8	0	0	9	8	0	0	0
C00409	CH4S	6	48.107	48.00337082	24.9666	8.3808	0	0	0	66.6535	0	0.46	18.84879901	2.839001615	13.1190262	2.336662917	46.76457379	4.650690268	5.278698731	0	1	0	1	NaN	0.836384752	0.836570292	2	2	5.628303761	14.2407	1	1	1	1	1	5	0	0	0	0	2	1	0	0	2	1	0	0	0
C00412	C39H70N7O17P3S	137	1033.996	1033.376174	45.3017	6.8236	26.3047	9.4823	8.9866	3.1011	0	291.82	238.0035868	20.12132004	105.7565474	7.153997636	903.332079	13.02002877	39.01555253	17	9	23	10	2.120196387	-4.418775819	0.214196583	256	23	97.70587592	245.8499	5000	128	1	128	36	139	3	3	14	15	53	54	1	2	58	59	9	10	0
C00415	C19H21N7O6	53	443.4133	443.1553314	51.4651	4.7736	21.6494	22.1119	0	0	0	64.26	112.9022341	10.8296066	54.61303306	5.62910366	367.7687494	9.669822005	20.69818958	11	7	15	8	3.345294268	-7.264372244	-2.092419646	256	16	40.93174386	121.1914	3518	2	1	2	1334	55	3	3	16	17	16	17	1	2	20	22	12	12	1
C00417	C6H6O6	18	174.1082	174.0164379	41.3905	3.4735	55.1361	0	0	0	0	31.73	47.86855645	4.674133592	30.89604336	3.929440662	137.7096748	5.733141416	9.32415348	6	3	9	3	NaN	-8.595848115	-0.521036942	16	32	13.48075804	35.2305	39	2	2	1	4	17	0	0	0	0	12	11	0	0	12	11	0	0	0
C00418	C6H12O4	22	148.1571	148.0735589	48.6404	8.1638	43.1958	0	0	0	0	13.9	46.78786909	5.001874914	30.2887945	3.737589551	141.3718283	5.895249006	9.946568501	4	3	5	3	1.065642034	-3.659812718	-1.093379559	16	16	13.6653512	34.5114	3	2	1	2	2	21	0	0	0	0	10	9	0	0	10	9	0	0	0
C00424	C3H6O2	11	74.0785	74.03677944	48.6404	8.1638	43.1958	0	0	0	0	3.54	27.33096685	3.448098544	20.07606988	3.005838794	73.05162627	5.305628511	6.66796485	2	1	3	1	5.395055071	-0.630445814	-0.63044577	8	4	6.9989956	17.9144	2	2	1	2	4	10	0	0	0	0	5	4	0	0	5	4	0	0	0
C00430	C5H9NO3	18	131.1299	131.0582432	45.797	6.9179	36.6036	10.6815	0	0	0	7.88	43.12918705	5.253307622	23.23475263	3.169253502	120.9275571	5.716178835	10.40591471	4	2	6	3	6.085410221	-3.718479985	-3.675888605	32	32	12.1488892	30.4478	6	1	1	1	18	17	0	0	0	0	9	8	0	0	9	8	0	0	0
C00437	C7H14N2O3	26	174.1977	174.1004423	48.2641	8.1007	27.5539	16.0814	0	0	0	12.71	52.89017079	5.329236229	38.74546041	4.683826953	166.5812858	7.007963275	10.63660007	4	3	6	4	6.766265596	-4.046921512	-4.046921512	32	32	16.95156089	42.6523	9	2	1	2	27	25	0	0	0	0	12	11	0	0	12	11	0	0	0
C00438	C5H8N2O5	20	176.1274	176.0433214	34.0966	4.5782	45.42	15.9052	0	0	0	11.8	45.43647773	4.739176477	33.91238589	3.965108854	142.6394586	6.454783259	9.121338257	5	4	8	5	0.378737488	-6.777880983	-1.735222155	128	128	13.73234713	34.6532	36	2	1	2	31	19	0	0	0	0	12	11	0	0	12	11	0	0	0
C00440	C20H25N7O6	58	459.4558	459.1866316	52.2823	5.4844	20.8935	21.3398	0	0	0	87.14	112.5721128	10.18989764	60.53940489	5.177857265	392.4521471	12.10910629	19.42339366	11	7	15	8	3.66663946	-7.433879185	-3.086603471	256	16	43.1575191	126.8813	3220	4	1	4	276	60	3	3	16	17	17	18	1	2	21	23	12	12	1
C00441	C4H7NO3	15	117.1033	117.0425931	41.026	6.0251	40.9879	11.961	0	0	0	5.71	35.98556511	4.34311438	23.37361104	3.083524863	104.1602001	6.042428564	8.718479458	4	2	6	3	5.472796469	-3.781823428	-3.77801379	32	32	10.33872781	25.6073	6	2	1	2	10	14	0	0	0	0	8	7	0	0	8	7	0	0	0
C00445	C20H22N7O6	55	456.432	456.1631565	52.6287	4.8583	21.0319	21.4812	0	0	0	83.33	125.9204911	10.64531664	55.62417496	5.124312347	376.6272429	8.43492079	21.2258822	10	6	14	7	3.582976427	-9.874746651	-4.574936227	256	12	42.32113998	134.3721	3724	4	1	4	782	58	4	4	19	21	14	15	2	2	21	24	12	12	1
C00446	C6H13O9P	29	260.1358	260.0297185	27.7025	5.0371	55.3536	0	11.9068	0	0	58.91	61.92622822	5.154311494	38.32383904	5.025408584	199.266044	6.373820739	9.841243814	8	6	9	6	NaN	-6.269104493	-3.056105249	128	13	19.793746	46.7963	4	32	1	32	1	29	1	1	6	6	10	10	1	0	16	16	0	0	0
C00447	C7H16O13P2	38	370.1417	370.0066136	22.7142	4.357	56.1926	0	16.7362	0	0	105.13	76.9580126	7.390328152	47.10722938	4.261137984	273.9962171	8.086672531	14.73810973	11	8	14	8	NaN	-10.34250711	-4.144498897	256	15	27.06604033	65.2701	32	16	1	16	11	37	0	0	0	0	22	21	0	0	22	21	0	0	0
C00448	C15H28O7P2	52	382.3261	382.1310263	47.1222	7.3817	29.2933	0	16.2028	0	0	140.84	106.0338481	9.506687256	48.76072613	4.736378212	341.3288328	7.814489199	18.87590853	5	3	7	3	NaN	-1.264529269	3.616733061	8	8	37.04837302	96.7305	17	8	4	2	1	51	0	0	0	0	24	23	0	0	24	23	0	0	0
C00449	C11H20N2O6	39	276.2863	276.1321364	47.8191	7.2963	34.7453	10.1393	0	0	0	23.74	80.25235556	7.763405866	45.8196989	5.268890785	255.0317858	7.246707389	14.8017024	8	5	11	6	2.99831542	-8.086990635	-5.674840052	128	256	25.77895827	63.953	27	4	1	4	92	38	0	0	0	0	19	18	0	0	19	18	0	0	0
C00455	C11H15N2O8P	37	334.2192	334.056602	39.5303	4.5237	38.2968	8.3817	9.2675	0	0	87.15	85.14505702	6.151712429	48.3479826	5.315406315	261.8927727	8.447332771	11.02155001	7	4	10	5	3.566688914	-8.558422455	-6.244347915	256	13	28.12095583	70.5857	60	32	1	32	2	38	2	2	11	11	11	12	1	1	16	17	6	6	0
C00458	C9H16N3O13P3	44	467.1569	466.9895971	23.1392	3.4522	44.523	8.9949	19.8908	0	0	176.81	97.44072516	8.294482189	52.47658579	4.90419	327.3368986	7.856314601	16.66492108	12	6	16	7	1.065627145	-10.117617	-3.771014349	256	256	34.93319207	85.6528	1332	32	1	32	3	45	2	2	11	11	17	18	1	1	22	23	6	6	0
C00459	C10H17N2O14P3	46	482.1683	481.9892628	24.9098	3.5537	46.4551	5.8099	19.2715	0	0	184.42	100.5365578	8.117974954	53.90888587	5.309168876	340.7976268	7.346390172	16.09175423	11	6	16	6	NaN	-9.341267231	-2.086216579	256	256	36.15248929	88.0307	1184	32	1	32	3	47	2	2	11	11	18	19	1	1	23	24	6	6	0
C00460	C9H15N2O14P3	43	468.1417	467.9736127	23.0905	3.2296	47.847	5.984	19.849	0	0	182.64	96.13198248	8.024158802	50.99779594	5.019403814	323.9400931	7.518604268	15.93492155	11	6	16	6	NaN	-9.737192098	-2.481767068	256	256	34.38596807	83.6736	1184	32	1	32	3	44	2	2	11	11	17	18	1	1	22	23	6	6	0
C00463	C8H7N	16	117.1479	117.0578492	82.0208	6.0228	0	11.9564	0	0	0	29.6	44.82640524	4.465313839	22.37216061	3.815932619	108.7730995	3.875082354	8.664313788	0	1	0	1	NaN	2.072007809	2.072007809	2	2	15.66808072	37.1445	26	1	1	1	1	17	2	2	9	10	0	0	0	2	0	0	9	10	1
C00468	C18H22O2	42	270.3661	270.1619799	79.9629	8.2017	11.8354	0	0	0	0	67.66	82.69831082	6.906782681	39.52943108	4.070125768	263.095919	6.138551637	13.95340101	2	1	3	1	NaN	4.308825641	4.309029034	8	4	30.76139977	79.0824	14	16	1	16	2	45	4	4	17	20	3	3	3	1	14	17	6	6	4
C00469	C2H6O	9	46.0684	46.04186481	52.1429	13.1275	34.7297	0	0	0	0	1.13	21.18727941	3.232812837	15.60784065	2.390214937	53.72941776	5.076266578	6.012618369	1	1	1	1	7.149056952	-0.161769114	-0.161769114	2	2	5.037120615	13.0099	1	1	1	1	1	8	0	0	0	0	3	2	0	0	3	2	0	0	0
C00470	C18H26O19	63	546.3876	546.1068287	39.5676	4.7963	55.6361	0	0	0	0	62.58	116.9887665	8.545476058	60.4560463	5.296882846	431.1072985	8.280003859	16.55080847	19	11	22	11	NaN	-15.6069582	-5.513386895	256	23	42.93461309	100.3522	27	32768	1	ERROR	8	65	3	3	18	18	19	21	3	0	37	39	0	0	0
C00472	C6H4O2	12	108.0948	108.0211294	66.6676	3.7298	29.6025	0	0	0	0	17.89	37.22502766	4.149078262	19.95576368	3.287283093	91.06767267	3.4	8.237306487	2	0	4	0	NaN	1.024113811	1.024113811	4	16	10.72925257	31.0288	5	1	1	1	1	12	1	1	6	6	2	2	1	0	8	8	0	0	1
C00473	C20H30O	51	286.4516	286.2296656	83.8585	10.5561	5.5854	0	0	0	0	82.2	98.37461733	8.907348295	42.55599112	4.414588064	309.9186961	6.394418094	17.32290606	1	1	1	1	7.122873217	4.694093173	4.694093173	2	2	36.34562278	97.9234	1	16	16	1	1	51	1	1	6	6	15	15	1	0	21	21	0	0	1
C00475	C9H13N3O5	30	243.2166	243.0855205	44.4445	5.3875	32.8913	17.2768	0	0	0	34.67	68.27368789	5.756225141	37.58317283	4.439724397	201.1981404	6.554510406	11.53132974	7	4	8	5	6.644388852	-2.797518762	-2.797517284	128	128	21.48729013	54.5448	18	16	1	16	3	31	2	2	11	11	6	7	1	1	11	12	6	6	0
C00477	C27H44O6	77	464.6347	464.3137891	69.7944	9.545	20.6606	0	0	0	0	135.23	121.4596266	9.296285396	61.19223576	5.77907736	465.6321029	8.120974761	17.79143762	6	5	7	5	5.540488278	1.691208105	1.69120824	256	256	50.4889903	127.4247	3	1024	1	1024	5	80	4	4	17	20	16	16	4	0	33	36	0	0	4
C00479	C3H6O	10	58.0791	58.04186481	62.0397	10.4128	27.5476	0	0	0	0	3.18	24.02131297	3.368678634	17.77034331	2.654059427	64.43687091	5.447658562	6.703633295	1	0	2	0	NaN	0.318573877	0.31857388	4	2	6.329682	16.3452	2	1	1	1	2	9	0	0	0	0	4	3	0	0	4	3	0	0	0
C00483	C8H11NO	21	137.179	137.084064	70.044	8.0824	11.6632	10.2105	0	0	0	19.58	48.6831068	5.392935687	25.04460159	3.411365747	136.2253185	5.44495954	10.74865608	2	2	2	3	9.941158654	-1.529431948	0.66209381	4	4	16.07010395	41.2673	5	1	1	1	1	21	1	1	6	6	4	4	0	1	4	4	6	6	1
C00487	C7H16NO3	27	162.2068	162.1130184	51.8319	9.9423	29.5907	8.6351	0	0	0	30.94	48.90653257	4.997632609	33.77553961	3.758527317	166.4129462	6.852137107	9.81230601	3	2	4	2	8.869942804	-4.351953659	-4.887506048	8	8	16.27941681	52.6482	3	2	1	2	2	26	0	0	0	0	11	10	0	0	11	10	0	0	0
C00490	C5H6O4	15	130.0987	130.0266087	46.16	4.6485	49.1916	0	0	0	0	12.18	39.99243268	4.88112799	24.73381775	3.241328861	110.2651048	5.628384744	9.753706606	4	2	6	2	NaN	-5.568435759	0.052824682	8	8	10.91522847	27.9149	12	1	1	1	4	14	0	0	0	0	9	8	0	0	9	8	0	0	0
C00491	C6H12N2O4S2	26	240.3	240.0238483	29.9893	5.0334	26.6324	11.6577	0	26.6875	0	17.58	65.09530863	6.298248294	35.31568828	3.924156697	196.4315833	6.233972491	12.50735841	6	4	8	6	5.237561604	-6.177563655	-6.171036847	64	64	22.17722426	54.8718	6	3	1	3	10	25	0	0	0	0	14	13	0	0	14	13	0	0	0
C00492	C18H32O16	66	504.4371	504.169035	42.8582	6.3941	50.7477	0	0	0	0	68.17	105.3097032	7.568923043	71.34694125	5.647049392	424.0774967	10.03476477	14.25971825	16	11	16	11	4.48954622	-6.299679361	-6.299670609	256	21	42.78405373	101.1874	1	16384	1	16384	1	68	3	3	17	17	17	19	3	0	34	36	0	0	0
C00493	C7H10O5	22	174.1513	174.0528234	48.2769	5.7877	45.9353	0	0	0	0	23.02	48.29837846	4.760863397	31.57332052	3.713157697	147.8675471	6.075455376	9.472555701	5	4	6	4	0.631425417	-4.446369874	-1.640074077	16	16	15.22994157	38.9603	4	8	1	8	31	22	1	1	6	6	6	6	1	0	12	12	0	0	1
C00499	C4H8N4O4	20	176.1307	176.0545548	27.2768	4.5781	36.3353	31.8098	0	0	0	14.73	50.83976776	5.517954825	31.03231509	3.656243417	139.6117622	6.536191711	10.97927604	4	5	7	7	0.078682544	-5.901223169	-2.572494902	256	256	13.72616626	35.1003	30	1	1	1	23	19	0	0	0	0	12	11	0	0	12	11	0	0	0
C00504	C19H19N7O6	51	441.3975	441.1396814	51.7002	4.3387	21.7483	22.2128	0	0	0	63.43	111.4539589	10.66722581	53.51741204	5.274578719	363.2002992	9.508811863	21.21035683	11	6	15	7	2.66296122	-7.022662124	-1.205319736	256	14	40.27272226	111.4446	3676	2	1	2	414	53	3	3	16	17	16	17	0	3	16	17	16	17	1
C00506	C3H7NO5S	17	169.156	169.004493	21.3011	4.171	47.2918	8.2803	0	18.9559	0	39.07	41.70540108	4.336415678	30.19803102	3.729646246	129.4050433	5.63500477	8.223767424	6	3	9	4	NaN	-6.694679731	-3.188169729	32	32	13.28670041	30.435	15	2	1	2	15	16	0	0	0	0	10	9	0	0	10	9	0	0	0
C00510	C39H68N7O17P3S	135	1031.98	1031.360524	45.3902	6.6416	26.3561	9.5009	9.0042	3.1071	0	268.4	228.98119	16.96443551	103.7771307	7.55722906	894.3993385	10.98383061	33.92423672	17	9	23	10	2.120196387	-4.780697476	-0.147725074	256	23	97.45426358	246.9665	5000	256	2	128	36	137	3	3	14	15	53	54	1	2	58	59	9	10	0
C00511	C3H4O2	9	72.0627	72.02112937	50.001	5.5948	44.4041	0	0	0	0	4.17	27.96264883	3.596374435	15.79640049	2.652814333	65.51806435	3.663800342	7.027964901	2	1	3	1	NaN	-1.729482963	0.532947293	2	2	6.579456421	17.2914	4	1	1	1	2	8	0	0	0	0	5	4	0	0	5	4	0	0	0
C00512	C28H40N7O17P3S	96	871.64	871.1414231	38.5824	4.6255	31.2044	11.2486	10.6605	3.6787	0	243.21	168.1553587	11.7199678	96.89244761	7.022261661	683.9008529	10.74204939	22.43515321	17	9	23	10	2.120196383	-9.733667203	-5.100694801	256	22	76.27416619	192.8785	4493	128	1	128	36	99	4	4	20	21	36	38	1	3	41	43	15	16	1
C00517	C16H32O	49	240.4247	240.2453156	79.9299	13.4155	6.6546	0	0	0	0	27.42	99.39201457	11.69377892	32.6428638	4.006522035	285.3569519	6.17477847	23.1035067	1	0	2	0	NaN	6.097966524	6.097966525	4	4	30.30995306	76.1582	2	1	1	1	2	48	0	0	0	0	17	16	0	0	17	16	0	0	0
C00519	C2H7NO2S	13	109.147	109.0197492	22.0083	6.4643	29.3172	12.8329	0	29.3778	0	15.94	33.91807666	4.419963307	21.3179653	2.892768951	93.12020274	4.983674713	8.226838483	3	2	4	3	4.354725118	-2.266298661	-2.265355628	4	4	10.07555648	23.1622	3	2	1	2	4	12	0	0	0	0	6	5	0	0	6	5	0	0	0
C00522	C6H12O4	22	148.1571	148.0735589	48.6404	8.1638	43.1958	0	0	0	0	16.36	42.40483875	4.348631965	33.09576594	3.988683303	141.6096774	6.465823826	8.779504299	4	3	5	3	0.588546282	-3.403122188	-0.487104603	16	16	13.6653512	34.0082	3	2	1	2	3	21	0	0	0	0	10	9	0	0	10	9	0	0	0
C00525	C11H12N2O2	27	204.2252	204.0898776	64.6922	5.9225	15.6684	13.7169	0	0	0	35.83	64.39055148	5.892784682	34.56577522	4.080501267	182.3183768	6.57553509	11.8758799	3	3	4	4	5.974857547	-1.223298665	-1.221953009	16	16	23.09200183	56.2028	78	2	1	2	4	28	2	2	9	10	6	6	0	2	6	6	9	10	1
C00526	C9H12N2O5	28	228.202	228.0746215	47.3687	5.3003	35.0553	12.2757	0	0	0	39.7	64.10261848	5.717564947	36.41447416	4.300363872	189.1500609	5.790996137	11.01808014	5	3	7	3	3.429914321	-1.515448661	-1.514604079	32	32	20.1916848	51.0549	16	8	1	8	3	29	2	2	11	11	5	6	1	1	10	11	6	6	0
C00527	C26H42N7O19P3S	98	881.633	881.1469024	35.4204	4.8017	34.4802	11.1211	10.5397	3.637	0	244.91	177.8647731	12.05940979	93.57856618	6.16683138	692.3250484	12.58379311	23.86308011	19	10	26	11	2.105562893	-14.22343137	-6.888013414	256	24	74.87514176	187.7023	5000	128	1	128	72	100	3	3	14	15	42	43	1	2	47	48	9	10	0
C00530	C6H6O2	14	110.1106	110.0367794	65.4471	5.4923	29.0606	0	0	0	0	16.11	38.53021322	4.282204227	21.47557662	3.57970661	99.04047783	4.655316826	8.306052149	2	2	2	2	NaN	1.365205858	1.366115173	4	4	11.53699138	30.0198	5	1	1	1	1	14	1	1	6	6	2	2	0	1	2	2	6	6	1
C00531	C26H40N7O19P3S	96	879.618	879.1312524	35.5016	4.5835	34.5592	11.1465	10.5638	3.6453	0	242.52	168.8129541	11.2757935	92.91358052	6.161336038	684.5099338	12.55553356	22.35268117	19	10	26	11	2.096175778	-14.40264549	-6.883054737	256	24	74.62018797	187.4792	5000	128	1	128	36	98	3	3	14	15	42	43	1	2	47	48	9	10	0
C00532	C5H12O5	22	152.1458	152.0684735	39.471	7.9498	52.5792	0	0	0	0	10.46	44.7741789	4.827007858	26.18517339	3.373115616	139.3656471	6.395127674	9.342096278	5	5	5	5	5.071891124	-3.09968466	-3.099683907	32	32	13.26117776	32.4411	1	3	1	3	1	21	0	0	0	0	10	9	0	0	10	9	0	0	0
C00534	C8H12N2O2	24	168.1931	168.0898776	57.1281	7.1913	19.025	16.6555	0	0	0	25.65	54.66620443	5.127591145	30.59182572	4.055539664	157.6126499	5.712742002	10.15011946	4	3	4	4	8.813629375	-2.841156821	-2.060223039	16	16	17.63022043	45.7628	12	1	1	1	1	24	1	1	6	6	6	6	0	1	6	6	6	6	0
C00535	C19H28O2	49	288.4244	288.2089301	79.1207	9.785	11.0943	0	0	0	0	81.62	80.96178788	6.878629846	46.86521967	4.429293722	293.4433845	7.355621068	13.56945498	2	1	3	1	8.971182029	3.365423296	3.365423298	16	16	33.2600637	84.4298	3	64	1	64	5	52	4	4	17	20	4	4	4	0	21	24	0	0	4
C00542	C7H14N2O4S	28	222.262	222.0674276	37.8269	6.3489	28.7938	12.6038	0	14.4267	0	15.82	64.12256304	7.288188076	24.68467714	3.267063492	194.361814	7.024349258	14.37167469	6	4	8	6	5.745501913	-6.095475222	-6.091839153	64	64	20.89339318	51.5689	9	4	1	4	16	27	0	0	0	0	14	13	0	0	14	13	0	0	0
C00544	C8H8O4	20	168.1467	168.0422587	57.1439	4.7955	38.0606	0	0	0	0	20.57	48.98048399	4.946058093	31.11610574	3.73248144	143.5829935	6.387782931	9.492194784	4	3	5	3	NaN	-2.171209275	1.003863462	8	8	15.80630647	41.3274	39	1	1	1	2	20	1	1	6	6	6	6	0	1	6	6	6	6	1
C00546	C3H4O2	9	72.0627	72.02112937	50.001	5.5948	44.4041	0	0	0	0	2.98	26.37408006	3.585594513	17.11838388	2.934475747	66.54333377	4.168701131	6.524301613	2	0	4	0	NaN	0.195950484	0.195950484	8	4	6.466762526	17.0511	3	1	1	1	3	8	0	0	0	0	5	4	0	0	5	4	0	0	0
C00555	C4H9NO	15	87.1204	87.06841392	55.1453	10.4126	18.3647	16.0774	0	0	0	4.94	35.05510247	4.707430125	19.5895399	2.867513663	93.35953794	5.120416544	9.374935484	2	1	3	2	12.31688201	-3.376680066	-0.780417868	8	8	9.696614083	24.5324	2	1	1	1	2	14	0	0	0	0	6	5	0	0	6	5	0	0	0
C00559	C10H13N5O3	31	251.2419	251.1018393	47.8053	5.2154	19.1044	27.8749	0	0	0	45.88	72.01165127	6.306853502	35.16013808	3.871000555	207.412188	5.898733927	12.6013734	7	3	7	4	9.422891331	-1.196044764	-1.190325809	128	128	23.8603694	61.6849	79	8	1	8	3	33	3	3	14	15	4	5	1	2	9	10	9	10	0
C00565	C3H9N	13	59.1103	59.07349929	60.9574	15.3467	0	23.6959	0	0	0	8.87	28.52421	3.319487277	20.39471821	3.200229192	75.37555061	4.363069705	6.540171421	1	0	1	0	NaN	-2.33625772	0.190169466	2	2	7.800994	19.9881	1	1	1	1	1	12	0	0	0	0	4	3	0	0	4	3	0	0	0
C00568	C7H7NO2	17	137.136	137.0476785	61.3077	5.145	23.3336	10.2137	0	0	0	17.34	49.17566312	5.173035238	18.82218277	3.447304857	120.7502759	4.155220552	10.38315496	3	2	4	3	3.715938663	-1.433746422	0.80190277	4	4	13.80824789	38.0146	16	1	1	1	1	17	1	1	6	6	4	4	0	1	4	4	6	6	1
C00570	C11H20N4O11P2	48	446.2442	446.0603805	29.6066	4.5174	39.4388	12.5552	13.882	0	0	138.61	97.63713828	7.052307447	61.19319764	5.638735004	337.5387663	9.651007345	13.39848352	11	6	14	8	2.41874877	-4.87021349	-5.062625224	256	13	36.15831078	88.7227	396	64	1	64	3	49	2	2	11	11	17	18	1	1	22	23	6	6	0
C00571	C6H13N	20	99.1741	99.10479942	72.6643	13.2123	0	14.1233	0	0	0	11.71	39.94329697	4.141607801	27.46557555	3.387929156	113.8965868	5.438914809	8.139971491	1	1	1	2	NaN	-1.719993857	1.173811666	2	2	12.59892579	30.933	1	1	1	1	1	20	1	1	6	6	1	1	1	0	7	7	0	0	1
C00575	C10H12N5O6P	34	329.2059	329.0525197	36.4839	3.6741	29.16	21.2735	9.4086	0	0	97.34	78.31246486	7.188583038	42.61231471	4.257481318	241.9393246	7.481104083	14.40067309	8	3	9	4	3.959840961	-3.698261734	-4.085815173	128	12	27.91253816	70.2895	395	32	1	32	3	37	4	4	18	20	4	5	2	2	13	15	9	10	0
C00576	C5H12NO	19	102.1549	102.091889	58.7867	11.8401	15.6619	13.7112	0	0	0	22.99	35.689492	4.14029761	28.03062062	3.303053373	115.2688853	6.333728835	7.813584168	1	0	2	0	NaN	-4.652800095	-4.652800095	2	2	11.47599607	41.0609	2	1	1	1	2	18	0	0	0	0	7	6	0	0	7	6	0	0	0
C00577	C3H6O3	12	90.0779	90.03169406	40.001	6.7138	53.2852	0	0	0	0	3.77	30.50277803	3.827533126	20.65223098	3.195104141	81.67002326	5.376758051	7.498005505	3	2	4	2	4.9526065	-1.677356418	-1.677355737	16	16	7.705621333	19.4581	2	2	1	2	4	11	0	0	0	0	6	5	0	0	6	5	0	0	0
C00579	C8H17NOS2	29	207.357	207.0751556	46.3382	8.2635	7.7159	6.7549	0	30.9273	0	20.25	64.92296017	7.024031046	34.97013053	4.198362497	197.6193877	6.352188886	13.63173136	1	3	2	4	4.539179655	1.395249689	1.395860522	16	16	22.78587407	57.7588	3	2	1	2	3	28	0	0	0	0	12	11	0	0	12	11	0	0	0
C00582	C29H42N7O17P3S	99	885.667	885.1570732	39.3275	4.7798	30.7102	11.0704	10.4917	3.6204	0	277.33	167.4131811	10.49733934	92.47980215	6.272255385	701.6551529	12.83354862	20.97550055	17	9	23	10	2.120196387	-9.953501821	-5.32052942	256	23	78.10174769	196.9299	5000	128	1	128	36	102	4	4	20	21	37	39	1	3	42	44	15	16	1
C00583	C3H8O2	13	76.0944	76.0524295	47.3518	10.5967	42.0515	0	0	0	0	3.34	30.30458946	3.890477129	20.29485299	2.957333972	79.37097033	5.154960148	7.684255459	2	2	2	2	5.954551676	-0.792104071	-0.792104056	4	4	7.533641524	18.9724	1	2	1	2	1	12	0	0	0	0	5	4	0	0	5	4	0	0	0
C00586	C6H12O5	23	164.1565	164.0684735	43.8997	7.3681	48.7322	0	0	0	0	16.99	43.36687063	4.331447185	34.74127466	4.026279688	145.6723075	6.582175158	8.489896224	5	4	5	4	4.727607617	-2.031903358	-2.031901155	32	32	14.43744018	34.4127	1	16	1	16	1	23	1	1	6	6	5	5	1	0	11	11	0	0	0
C00588	C5H15NO4P	26	184.1507	184.0738695	32.6111	8.2102	34.7528	7.6061	16.8198	0	0	67.72	50.8428645	5.549875475	28.88980036	3.495032665	166.5444876	6.878213313	11.09741946	3	2	4	2	3.511729537	-2.819801755	-4.785835194	4	4	16.46362004	53.0669	4	1	1	1	1	25	0	0	0	0	11	10	0	0	11	10	0	0	0
C00590	C10H12O3	25	180.2005	180.0786443	66.6519	6.7121	26.636	0	0	0	0	32.09	61.80944852	6.035554949	29.47738411	4.192417509	168.4294038	5.904362614	11.95923175	3	2	3	2	3.724120835	1.354121217	1.354575135	8	8	19.42508473	51.6366	28	2	2	1	1	25	1	1	6	6	7	7	0	1	7	7	6	6	1
C00593	C2H4O4S	11	124.116	123.9830293	19.354	3.2484	51.5627	0	0	25.8347	0	36.02	31.77818339	4.010048753	22.96589675	3.026021776	91.97703216	6.497663856	7.432943034	4	1	7	1	NaN	-3.560837456	-1.18443886	16	8	9.418761	22.0621	10	1	1	1	8	10	0	0	0	0	7	6	0	0	7	6	0	0	0
C00596	C5H6O3	14	114.0993	114.0316941	52.6327	5.3003	42.067	0	0	0	0	26.31	39.18498203	4.344795649	21.11587056	3.245666615	100.3504059	4.829706288	8.68625143	3	2	4	2	NaN	-2.447615695	0.541505285	4	4	10.65130667	29.5774	15	2	2	1	11	13	0	0	0	0	8	7	0	0	8	7	0	0	0
C00601	C8H8O	17	120.1485	120.0575149	79.9724	6.7113	13.3164	0	0	0	0	16.99	43.52117198	4.56353511	25.85437637	3.4829033	118.211179	5.644073895	8.825214725	1	0	2	0	NaN	1.452377848	1.452377853	4	4	14.09236569	36.4402	2	1	1	1	2	17	1	1	6	6	3	3	0	1	3	3	6	6	1
C00603	C3H6N2O4	15	134.0907	134.0327567	26.8714	4.5101	47.7271	20.8914	0	0	0	8.57	42.04424614	4.68610202	21.31606391	3.249917129	106.4356758	4.693394792	9.215619596	4	4	6	5	NaN	-5.367430353	-1.950914175	64	64	10.11712206	25.3223	12	2	1	2	13	14	0	0	0	0	9	8	0	0	9	8	0	0	0
C00606	C3H7NO4S	16	153.157	153.0095784	23.5263	4.6068	41.7856	9.1453	0	20.936	0	18.36	40.43012755	4.603575546	24.68907202	3.177228556	120.9558278	6.611965416	9.248495945	5	3	7	4	0.17469142	-6.2131772	-2.61247645	16	32	12.61030805	28.9921	9	4	1	4	10	15	0	0	0	0	9	8	0	0	9	8	0	0	0
C00617	C15H22N2O18P2	59	580.2853	580.0342849	31.0469	3.8213	49.6289	4.8275	10.6754	0	0	165.05	114.7454259	7.314311658	68.70289275	5.72363459	424.9848691	8.789990147	14.24342585	15	9	20	9	NaN	-12.72555514	-4.676333541	256	22	44.32593285	106.3232	1056	2048	1	2048	6	61	3	3	17	17	20	22	2	1	31	33	6	6	0
C00619	C19H28O	48	272.425	272.2140155	83.7674	10.3597	5.873	0	0	0	0	82.76	80.83125077	6.778671591	45.33559192	4.432413439	284.8892577	7.489807344	13.54636526	1	0	2	0	7.123321595	4.596234365	4.596234365	8	8	32.65920043	82.9143	3	32	1	32	5	51	4	4	17	20	3	3	4	0	20	23	0	0	4
C00620	C5H11O8P	25	230.1098	230.0191538	26.0978	4.8183	55.6235	0	13.4604	0	0	58.79	54.53526118	5.136957706	36.19239412	4.607160457	173.1628166	7.338778707	10.33529671	7	5	8	5	NaN	-5.638765912	-2.425770307	64	256	17.28243	40.8338	4	16	1	16	1	25	1	1	5	5	9	9	1	0	14	14	0	0	0
C00621	C25H46O7P2	80	520.5761	520.2718769	57.6798	8.9065	21.5138	0	11.8998	0	0	201.54	148.8894319	12.42799132	75.295381	5.891546198	505.4216684	9.285895427	24.54627886	5	3	7	3	NaN	2.305271325	7.185833632	8	8	55.10325651	143.6397	17	32	8	4	1	79	0	0	0	0	34	33	0	0	34	33	0	0	0
C00623	C3H9O6P	19	172.0737	172.0136745	20.9399	5.2718	55.788	0	18.0003	0	0	47.51	45.48761248	5.367113834	24.49666907	3.266337391	132.9201704	5.299052245	10.78326073	5	4	6	4	NaN	-4.927419377	-1.962580054	16	16	12.86560871	31.389	4	2	1	2	1	18	0	0	0	0	10	9	0	0	10	9	0	0	0
C00624	C7H11NO5	24	189.1659	189.0637225	44.4451	5.8612	42.2893	7.4045	0	0	0	22.42	50.94892774	5.058856325	40.25933606	4.502535827	165.4244745	7.992035688	10.00341136	5	3	8	3	1.086277764	-7.039473408	-1.113015417	32	64	16.13146896	40.7315	27	2	1	2	62	23	0	0	0	0	13	12	0	0	13	12	0	0	0
C00627	C8H12NO6P	28	249.1577	249.0402236	38.5642	4.8545	38.5284	5.6216	12.4314	0	0	70.63	65.53334827	5.90019236	34.88200975	4.256557089	199.2074486	7.741991405	11.98706783	6	4	7	4	3.59308377	-3.890988126	-3.830172737	32	32	21.26142908	54.9782	48	1	1	1	1	28	1	1	6	6	10	10	0	1	10	10	6	6	0
C00628	C7H6O4	17	154.1201	154.0266087	54.5515	3.924	41.5245	0	0	0	0	21.74	48.84391017	4.726727774	24.50482428	3.714042871	126.6949483	4.064845041	8.835388755	4	3	5	3	NaN	-1.809229451	1.673698081	8	8	13.96615979	37.276	47	1	1	1	1	17	1	1	6	6	5	5	0	1	5	5	6	6	1
C00630	C25H42N7O17P3S	95	837.624	837.1570732	35.8475	5.054	32.4716	11.7054	11.0934	3.8281	0	251.39	164.3070725	10.63048323	93.89769569	6.179061277	664.7458289	12.62170495	20.87088416	17	9	23	10	2.120196387	-10.54431952	-5.911347114	256	23	72.33742126	181.4094	5000	128	1	128	36	97	3	3	14	15	39	40	1	2	44	45	9	10	0
C00631	C3H7O7P	18	186.0572	185.9929391	19.3661	3.7922	60.1943	0	16.6474	0	0	48.74	42.74613725	4.406661909	32.2760818	4.104297112	135.1033668	6.759089938	7.956133227	6	4	8	4	NaN	-8.258827356	-1.642305516	32	32	12.95952067	31.2564	12	2	1	2	2	17	0	0	0	0	11	10	0	0	11	10	0	0	0
C00632	C7H7NO3	18	153.1354	153.0425931	54.9023	4.6074	31.3436	9.1466	0	0	0	22.84	51.2689079	4.83610956	25.46016526	4.206768886	129.3200588	3.929234543	9.036443909	4	3	5	4	3.028905015	-1.357264403	1.148337448	8	8	14.46461396	39.9955	50	1	1	1	1	18	1	1	6	6	5	5	0	1	5	5	6	6	1
C00633	C7H6O2	15	122.1213	122.0367794	68.8454	4.9522	26.2025	0	0	0	0	17.72	43.10912627	4.679778666	20.47576476	3.4289765	109.6889589	4.758830369	9.39556256	2	1	3	1	NaN	1.213920231	1.382182839	4	2	12.82548952	34.6229	11	1	1	1	1	15	1	1	6	6	3	3	0	1	3	3	6	6	1
C00636	C6H13O9P	29	260.1358	260.0297185	27.7025	5.0371	55.3536	0	11.9068	0	0	60.95	57.74433904	5.150588359	41.39976416	4.470373848	199.3028848	7.708907853	9.73223483	8	6	9	6	NaN	-6.269104493	-3.056105249	128	13	19.793746	46.7963	4	32	1	32	1	29	1	1	6	6	10	10	1	0	16	16	0	0	0
C00637	C10H9NO	21	159.1846	159.0684139	75.4514	5.6987	10.0508	8.799	0	0	0	32.57	54.17216457	4.832671329	29.26788836	4.04533145	144.8706923	5.865921173	9.977678359	1	1	2	1	NaN	1.551139841	1.551139846	8	8	19.33129189	47.5267	52	1	1	1	2	22	2	2	9	10	3	3	0	2	3	3	9	10	1
C00642	C8H8O3	19	152.1473	152.0473441	63.153	5.2998	31.5472	0	0	0	0	18.43	47.92006873	5.250092013	27.47858903	3.585951014	135.0711941	5.939760324	10.47579695	3	2	4	2	NaN	-1.583115153	1.307428784	4	4	15.14985782	39.3465	15	1	1	1	2	19	1	1	6	6	5	5	0	1	5	5	6	6	1
C00645	C8H15NO6	30	221.2078	221.0899372	43.4368	6.8348	43.3965	6.3319	0	0	0	21.17	58.66270812	5.404490836	40.43993524	4.352228011	193.379579	7.605780458	10.31896657	6	5	7	5	5.404543301	-3.220584964	-3.220574412	128	128	19.39871471	47.0247	3	32	1	32	3	30	1	1	6	6	9	9	1	0	15	15	0	0	0
C00647	C8H13N2O5P	29	248.173	248.056208	38.7172	5.2799	32.2344	11.2879	12.4807	0	0	71.33	66.22726741	5.909726812	35.73229833	4.273967939	202.4191987	7.844497382	11.99393831	6	4	7	5	5.191163169	-3.15040803	-3.087759616	32	32	22.07781745	56.6357	48	1	1	1	1	29	1	1	6	6	10	10	0	1	10	10	6	6	0
C00650	C8H7NO2	18	149.1467	149.0476785	64.4236	4.7306	21.4546	9.3912	0	0	0	18.98	45.50700215	4.971815138	27.51568802	3.418072061	132.6098695	6.321057577	9.982838308	3	2	3	2	2.619451953	0.648708925	0.65021919	8	8	15.08322505	39.664	10	2	1	2	3	18	1	1	6	6	5	5	0	1	5	5	6	6	1
C00652	C5H8O5	18	148.114	148.0371734	40.5455	5.4441	54.0104	0	0	0	0	21.88	40.87406008	4.366004542	28.47755392	3.783750931	121.5887388	6.022761538	8.558206653	4	3	5	3	4.357046765	-2.114948325	-2.114938244	32	16	12.11786585	28.8163	3	8	1	8	1	18	1	1	5	5	5	5	1	0	10	10	0	0	0
C00655	C10H13N4O9P	37	364.2054	364.0420145	32.9778	3.5978	39.5366	15.3833	8.5045	0	0	100.23	88.30037192	7.214988108	45.74373382	4.772379851	265.2563712	6.782735302	13.9317102	9	6	12	6	0.646867907	-5.120651073	-2.178537767	256	256	28.36960129	73.0814	344	16	1	16	6	39	3	3	14	15	10	11	1	2	15	16	9	10	0
C00665	C6H14O12P2	34	340.1157	339.9960489	21.1881	4.1489	56.4493	0	18.2137	0	0	107.1	68.82091304	5.677600967	45.97771419	4.845966555	243.9450655	8.386154121	11.06898401	10	7	12	7	NaN	-9.679804351	-3.005131381	256	13	24.46880327	58.1066	16	16	1	16	1	34	1	1	5	5	15	15	1	0	20	20	0	0	0
C00668	C6H13O9P	29	260.1358	260.0297185	27.7025	5.0371	55.3536	0	11.9068	0	0	59.22	63.84323358	5.886371537	36.62600001	4.13111512	199.2599575	7.576183792	11.59617388	8	6	9	6	NaN	-6.244320586	-3.056105249	128	256	19.793746	46.7963	4	32	1	32	1	29	1	1	6	6	10	10	1	0	16	16	0	0	0
C00669	C8H14N2O5S	30	250.272	250.0623423	38.3925	5.6383	31.964	11.1932	0	12.8121	0	17.78	63.80435677	6.275338555	43.74678003	4.302047808	212.9901312	8.094303164	12.60982596	6	5	9	6	2.66839621	-6.873881308	-3.913758514	256	256	22.50594708	56.3114	27	4	1	4	131	29	0	0	0	0	16	15	0	0	16	15	0	0	0
C00670	C8H21NO6P	37	258.2292	258.1106489	37.2094	8.1969	37.1749	5.4241	11.9947	0	0	81.58	69.33788921	5.941718699	47.52804413	5.153926375	235.3655185	7.48777131	11.96178466	4	3	5	3	7.74492986	-4.039210033	-5.728311425	8	8	23.52525076	69.804	5	4	1	4	1	36	0	0	0	0	16	15	0	0	16	15	0	0	0
C00671	C6H10O3	19	130.1418	130.0629942	55.3736	7.7449	36.8815	0	0	0	0	11.71	39.41057427	4.321081698	30.52311901	3.662348712	126.2082941	6.959724223	8.483576193	3	1	5	1	NaN	-1.449787063	1.753964744	8	4	12.43888663	31.7921	5	2	1	2	12	18	0	0	0	0	9	8	0	0	9	8	0	0	0
C00672	C5H11O7P	24	214.1104	214.0242392	28.0479	5.1783	52.3075	0	14.4663	0	0	57.75	52.85028789	5.18712005	33.798919	3.949253489	164.4603362	6.497447866	10.1688613	6	4	7	4	NaN	-4.571297568	-1.525132244	32	32	16.53965714	39.3231	4	8	1	8	1	24	1	1	5	5	8	8	1	0	13	13	0	0	0
C00673	C5H11O7P	24	214.1104	214.0242392	28.0479	5.1783	52.3075	0	14.4663	0	0	58.44	53.73447903	5.381307889	32.72765226	3.910189781	164.5349207	6.405535057	10.19918058	6	4	7	4	NaN	-4.707541571	-1.525132244	32	32	16.53965714	39.3231	4	8	1	8	1	24	1	1	5	5	8	8	1	0	13	13	0	0	0
C00674	C19H28O2	49	288.4244	288.2089301	79.1207	9.785	11.0943	0	0	0	0	73.07	83.98292957	6.917965901	42.01542937	4.378873433	294.5656757	6.501528978	13.79124717	2	0	4	0	NaN	3.974785338	3.974785338	16	8	32.95245782	82.7808	4	64	1	64	6	52	4	4	17	20	4	4	4	0	21	24	0	0	4
C00689	C12H23O14P	50	422.2764	422.082542	34.1313	5.4899	53.0438	0	7.3349	0	0	83.27	93.57985727	6.419255059	59.56707904	5.798468225	334.4102632	9.330988663	12.01358615	13	9	14	9	NaN	-8.015160333	-4.826940895	256	18	33.58859416	79.2096	4	1024	1	1024	1	51	2	2	12	12	15	16	2	0	27	28	0	0	0
C00705	C9H15N3O10P2	39	387.177	387.0232667	27.9191	3.905	41.3232	10.8529	15.9998	0	0	126.75	87.73870946	8.000772526	46.73814539	5.213858148	282.3576547	7.42839262	14.36963263	10	5	13	6	1.45276812	-7.323218307	-2.993449433	256	128	30.12742688	74.7799	306	16	1	16	3	40	2	2	11	11	13	14	1	1	18	19	6	6	0
C00712	C18H34O2	54	282.4614	282.2558803	76.5388	12.1326	11.3286	0	0	0	0	35.64	105.258892	10.37503868	57.81506075	6.475922565	319.9992647	7.330892737	20.04431543	2	1	3	1	NaN	4.780750808	6.783798451	2	4	34.16541003	87.4022	3	2	2	1	2	53	0	0	0	0	20	19	0	0	20	19	0	0	0
C00725	C8H14O2S2	26	206.326	206.0435211	46.5698	6.8393	15.5089	0	0	31.0819	0	31.77	65.28897257	6.971800003	29.33116135	3.343876491	184.7953575	6.66741546	13.49421851	2	1	3	1	NaN	-0.327361397	2.113779408	2	4	21.43100241	54.3714	3	2	1	2	2	26	1	1	5	5	7	7	1	0	12	12	0	0	0
C00738	C6H12O6	24	180.1559	180.0633881	40.001	6.7138	53.2852	0	0	0	0	14.67	53.71263611	5.147253108	32.60954833	4.484389754	154.2345629	5.401180922	10.20963427	6	5	6	5	4.219934327	-2.932561057	-2.932539218	64	128	15.15588267	35.9234	1	32	1	32	1	24	1	1	6	6	6	6	1	0	12	12	0	0	0
C00740	C3H7NO3	14	105.0926	105.0425931	34.286	6.7137	45.6723	13.328	0	0	0	3.82	31.79899997	4.113903534	22.8379732	3.084690006	93.50103372	5.552915215	7.759833936	4	3	5	4	5.691890927	-4.028541117	-4.02426339	16	16	9.064301786	22.041	3	2	1	2	5	13	0	0	0	0	7	6	0	0	7	6	0	0	0
C00748	C42H44FeN4O16	107	916.661	916.2101735	55.0312	4.8381	27.9264	6.1121	0	0	0	307.18	194.7955439	9.552811405	122.1057794	8.498830998	754.8919699	14.80243298	17.86424856	18	8	26	8	2.177117011	-21.87837942	2.979	256	11	85.89167645	210.6057	5000	16	1	16	1024	112	6	6	25	30	38	38	5	1	58	63	5	5	0
C00750	C10H26N4	40	202.3402	202.2157469	59.3589	12.9517	0	27.6894	0	0	0	20.63	81.11680446	9.154955547	35.5422401	4.002470182	229.8683116	6.302818827	18.2647538	4	4	4	6	NaN	-10.52467215	-1.454007616	16	16	25.28422232	62.5582	1	1	1	1	1	39	0	0	0	0	14	13	0	0	14	13	0	0	0
C00751	C30H50	80	410.718	410.3912516	87.7295	12.2705	0	0	0	0	0	100.84	147.1156378	13.86935152	62.86618344	5.150061104	474.9789609	11.05634833	27.69131197	0	0	0	0	NaN	10.42201155	10.42201155	1	1	54.78873711	144.6178	1	10	10	1	1	79	0	0	0	0	30	29	0	0	30	29	0	0	0
C00780	C10H12N2O	25	176.2151	176.094963	68.1593	6.8639	9.0795	15.8973	0	0	0	35.4	59.11845962	5.460086524	32.57219729	4.35559799	162.9550432	5.43976148	10.46588173	2	3	2	4	9.779114702	-1.390392758	0.407715476	8	8	21.30261872	52.3538	41	1	1	1	1	26	2	2	9	10	4	4	0	2	4	4	9	10	1
C00794	C6H14O6	26	182.1718	182.0790382	39.5584	7.7461	52.6955	0	0	0	0	13.57	52.21453168	5.370800072	30.8513214	3.558241758	165.0139891	5.910285633	10.64919825	6	6	6	6	4.985128684	-3.730019976	-3.730018849	64	64	15.77614694	38.4036	1	10	1	10	1	25	0	0	0	0	12	11	0	0	12	11	0	0	0
C00804	C3H2O2	7	70.0468	70.00547931	51.44	2.8779	45.682	0	0	0	0	-0.09	25.23596863	3.782074236	14.82178646	2.645468767	60.34965637	3.63163802	7.375974339	2	1	3	1	NaN	-3.333359496	0.181969733	2	4	5.772807111	15.784	4	1	1	1	1	6	0	0	0	0	5	4	0	0	5	4	0	0	0
C00805	C7H6O3	16	138.1207	138.0316941	60.8706	4.3785	34.7509	0	0	0	0	19.67	47.18692957	4.729330556	22.08677433	3.671932374	118.2721143	3.919232917	9.322736479	3	2	4	2	NaN	-1.469966172	1.977263402	4	4	13.2987811	35.2951	24	1	1	1	1	16	1	1	6	6	4	4	0	1	4	4	6	6	1
C00811	C9H8O3	20	164.158	164.0473441	65.8489	4.912	29.239	0	0	0	0	26.9	57.37851023	6.092282628	24.31715909	3.515467809	144.5879462	4.251831105	11.85494282	3	2	4	2	NaN	-1.055065721	1.832520938	4	4	16.80693561	45.0408	27	2	2	1	2	20	1	1	6	6	6	6	0	1	6	6	6	6	1
C00818	C6H10O8	24	210.1388	210.0375673	34.2936	4.7965	60.9098	0	0	0	0	12.79	51.30102333	5.665942909	33.7249715	3.831362294	169.3259061	7.686292542	10.5084426	8	6	10	6	NaN	-9.760341613	-3.089469773	256	256	15.89008058	38.1384	6	10	1	10	23	23	0	0	0	0	14	13	0	0	14	13	0	0	0
C00826	C10H13NO5	29	227.2139	227.0793725	52.8608	5.7669	35.2078	6.1645	0	0	0	28.25	58.66008727	5.0373344	42.71358473	4.911788177	197.220115	7.777277491	10.00454138	6	4	8	5	2.846838947	-5.993887945	-3.222758295	32	32	21.24030163	55.9587	9	4	1	4	4	29	1	1	6	6	10	10	1	0	16	16	0	0	1
C00828	C21H24O2	47	308.4141	308.17763	81.7812	7.8435	10.3753	0	0	0	0	79.29	91.78916773	7.575982589	60.25021448	4.908524919	306.9708198	8.91644736	14.96099541	2	0	4	0	NaN	5.160278814	5.160278814	4	2	36.63947909	97.9016	59	2	2	1	9	48	2	2	10	11	13	13	1	1	17	18	6	6	2
C00829	C10H8	18	128.1705	128.0626003	93.7088	6.2912	0	0	0	0	0	24.82	50.00099702	4.740137099	22.96720353	3.671931569	125.1710395	3.946138847	9.02885977	0	0	0	0	NaN	2.962722573	2.962722573	1	1	18.07725632	42.5082	1	1	1	1	1	19	2	2	10	11	0	0	0	2	0	0	10	11	2
C00831	C11H22N2O4S	40	278.368	278.1300279	47.4615	7.966	22.9903	10.0634	0	11.5189	0	32.16	81.72033561	8.13132811	46.88277336	4.765383584	261.9140775	7.667765655	16.22528026	4	5	6	5	4.32305063	-1.533624387	-1.533281731	256	256	27.78886682	70.7049	9	2	1	2	12	39	0	0	0	0	18	17	0	0	18	17	0	0	0
C00836	C18H39NO2	60	301.5078	301.2980795	71.7038	13.0377	10.6129	4.6456	0	0	0	43.47	115.3441966	12.38697182	36.52595842	4.222052035	346.6866088	7.033316523	24.73921775	3	3	3	4	11.83163725	2.5543821	4.772594245	8	8	36.66159362	90.9294	1	4	1	4	1	59	0	0	0	0	21	20	0	0	21	20	0	0	0
C00842	C16H26N2O16P2	62	564.329	564.0757558	34.053	4.6438	45.3619	4.964	10.9772	0	0	165.27	112.0668251	7.882293038	71.86207279	5.255902468	431.1921862	11.94291857	15.20414846	13	8	17	8	NaN	-8.439172843	-3.700419526	256	18	45.309024	109.3022	352	1024	1	1024	3	64	3	3	17	17	19	21	2	1	30	32	6	6	0
C00857	C21H27N6O15P2	71	665.4178	665.1009622	37.9047	4.0898	36.0662	12.6297	9.3096	0	0	199.83	113.6948053	7.579860346	85.49585144	5.876597161	504.2214352	11.956351	14.261378	16	8	19	9	2.980665619	-12.4043316	-10.13234699	256	22	55.86165126	140.1747	5000	1024	1	1024	3	75	5	5	25	26	19	22	2	3	29	32	15	16	0
C00860	C6H11N3O	21	141.171	141.090212	51.0475	7.8538	11.3333	29.7654	0	0	0	21.98	46.89430742	5.330363479	26.3101564	3.272161763	132.863232	5.45766803	9.877876274	3	3	3	4	11.73869713	-3.546827387	-1.331306086	16	16	14.74832323	37.6259	8	2	1	2	2	21	1	1	5	5	5	5	0	1	5	5	5	5	0
C00864	C9H17NO5	32	219.235	219.1106727	49.3061	7.8158	36.4892	6.3889	0	0	0	25.44	62.88692057	6.552478193	36.67239175	3.994179091	206.420595	7.511965102	12.90373491	5	4	7	4	0.804791929	-3.948324998	-1.355375107	64	64	20.43725139	51.5111	9	2	1	2	8	31	0	0	0	0	15	14	0	0	15	14	0	0	0
C00870	C6H5NO3	15	139.1088	139.026943	51.8042	3.6228	34.5041	10.0689	0	0	0	20.66	44.93234636	4.676804898	19.66683735	3.331040094	113.4254103	3.793949347	9.285084019	3	1	5	1	NaN	1.328909425	1.609664684	2	2	12.85784611	35.3636	20	1	1	1	1	15	1	1	6	6	4	4	0	1	4	4	6	6	1
C00877	C25H40N7O17P3S	93	835.608	835.1414231	35.934	4.8249	32.5499	11.7336	11.1202	3.8373	0	246.17	166.7581175	11.11521428	93.17733436	6.297562652	656.1843167	12.87886224	21.88888877	17	9	23	10	2.120196383	-10.41158031	-5.778607904	256	23	72.08167846	182.5292	5000	256	2	128	36	95	3	3	14	15	39	40	1	2	44	45	9	10	0
C00881	C9H13N3O4	29	227.2172	227.0906059	47.574	5.7668	28.1658	18.4934	0	0	0	33.96	65.945828	5.889524073	36.62571704	4.059479386	192.5089295	5.962451946	11.75836944	6	3	7	4	7.595541661	-1.896880321	-1.896879221	64	32	20.7866928	53.0341	18	8	1	8	3	30	2	2	11	11	5	6	1	1	10	11	6	6	0
C00882	C21H35N7O13P2S	79	687.554	687.148878	36.6843	5.1309	30.251	14.2602	9.0098	4.6636	0	190.37	131.5696086	7.504685758	104.9174087	8.159657637	548.9354047	13.24300957	13.77834796	14	9	18	10	2.916027089	-8.012779847	-6.103567143	256	20	60.34189205	151.8673	5000	128	1	128	36	81	3	3	14	15	30	31	1	2	35	36	9	10	0
C00885	C10H10O6	26	226.1828	226.0477381	53.1017	4.4563	42.442	0	0	0	0	36.91	64.16298822	6.452199935	34.3151551	3.861699671	186.5543369	5.910257626	12.65351118	6	3	8	3	NaN	-6.178001585	-0.125490597	16	16	20.22141614	54.3101	49	4	1	4	1	26	1	1	6	6	10	10	1	0	16	16	0	0	1
C00894	C24H38N7O17P3S	90	821.582	821.1257731	35.0856	4.6619	33.1056	11.9339	11.31	3.9028	0	230.48	168.6591721	12.07126706	98.66022283	7.444523656	639.6109768	10.76096179	23.79759842	17	9	23	10	2.120196383	-10.7982153	-6.165242899	256	23	70.27906627	176.8557	5000	128	1	128	36	92	3	3	14	15	38	39	1	2	43	44	9	10	0
C00899	C20H30O	51	286.4516	286.2296656	83.8585	10.5561	5.5854	0	0	0	0	83.49	93.81077122	7.041827482	54.87532111	5.121882911	310.3106641	8.758659885	13.72826208	1	1	1	1	7.122873217	4.694093173	4.694093173	2	2	36.34562278	97.9234	1	16	16	1	1	51	1	1	6	6	15	15	1	0	21	21	0	0	1
C00900	C5H8O4	17	132.1146	132.0422587	45.4556	6.1034	48.441	0	0	0	0	10.23	35.23096853	4.066087684	29.96199408	3.402875918	117.8244334	6.970343724	7.454618358	4	2	6	2	NaN	-3.522886905	-0.28388432	16	8	11.33158423	28.5904	6	2	1	2	2	16	0	0	0	0	9	8	0	0	9	8	0	0	0
C00909	C20H30O3	53	318.4504	318.2194948	75.4322	9.4954	15.0724	0	0	0	0	163.76	102.7212705	9.500560041	68.14279601	6.148066701	328.4240721	9.036297745	17.81769732	3	1	4	1	0.119713782	2.97270994	5.443159709	4	8	37.08014354	99.3209	3	64	16	4	2	53	1	1	3	3	20	20	1	0	23	23	0	0	0
C00921	C14H14N6O3	37	314.2994	314.1127383	53.4999	4.4897	15.2715	26.7389	0	0	0	51.26	91.36669324	9.180894785	35.0490511	4.129878377	257.9721894	7.640656076	18.26012833	8	5	10	6	4.132876102	-2.522012509	-0.478916642	256	12	30.03327833	93.1036	1312	1	1	1	29	39	3	3	16	17	7	8	1	2	11	13	12	12	1
C00931	C10H14N2O4	30	226.2292	226.0953569	53.0908	6.2376	28.2888	12.3828	0	0	0	26.93	68.34541812	6.610813112	37.20321134	4.356877864	200.4927082	5.709342678	13.29007509	5	4	7	5	4.203919119	-5.62154638	-3.231189373	16	32	21.72310146	56.3839	63	1	1	1	4	30	1	1	5	5	11	11	0	1	11	11	5	5	0
C00942	C10H12N5O7P	35	345.2053	345.0474343	34.7929	3.5038	32.4432	20.2875	8.9726	0	0	100.34	80.7245894	6.958156607	40.77847761	4.285358626	249.3864147	7.097855944	13.79988514	8	4	10	5	1.623075335	-4.309164022	-2.446350565	128	11	27.73992957	71.715	485	32	1	32	6	38	4	4	18	20	5	6	2	2	14	16	9	10	0
C00944	C7H10O6	23	190.1507	190.0477381	44.2149	5.3007	50.4844	0	0	0	0	17.23	44.19309028	4.546714614	36.77964455	3.982119946	157.914223	7.992414988	9.067337111	6	4	8	4	0.086335153	-5.358911004	-2.055249879	128	64	15.67843216	38.6974	6	8	1	8	7	23	1	1	6	6	7	7	1	0	13	13	0	0	1
C00951	C18H24O2	44	272.382	272.17763	79.3711	8.8811	11.7478	0	0	0	0	68.61	84.04215063	7.309632198	38.96282202	4.017314458	269.8452575	6.781839729	14.44124418	2	2	2	2	4.718499642	3.745297981	3.745501328	4	4	31.30957969	79.9047	7	32	1	32	1	47	4	4	17	20	3	3	3	1	14	17	6	6	4
C00954	C10H9NO2	22	175.184	175.0633285	68.5605	5.1782	18.2658	7.9954	0	0	0	31.99	55.45287379	4.887239119	32.27923972	4.032779097	153.2374344	6.524808568	9.548702616	2	2	3	2	NaN	-0.603289904	1.709756098	4	4	19.7223649	48.4521	78	1	1	1	2	23	2	2	9	10	4	4	0	2	4	4	9	10	1
C00956	C6H11NO4	22	161.1558	161.0688078	44.7171	6.8799	39.7116	8.6914	0	0	0	10.58	51.75662647	5.898517669	27.5992538	3.414862519	146.6716711	6.203902253	11.67870081	5	3	7	4	2.952587298	-5.425844382	-2.934916124	16	32	14.4943446	35.8887	9	2	1	2	8	21	0	0	0	0	11	10	0	0	11	10	0	0	0
C00957	C3H4O3S	11	120.127	119.9881147	29.995	3.3562	39.9562	0	0	26.6926	0	4.15	35.69448453	4.371681779	21.95632586	3.231126871	93.63132704	5.192469584	8.650126164	3	2	5	2	NaN	-3.131937093	0.292439375	16	8	10.06219875	25.8189	5	1	1	1	7	10	0	0	0	0	7	6	0	0	7	6	0	0	0
C00966	C6H10O4	20	146.1412	146.0579088	49.3114	6.897	43.7916	0	0	0	0	19.34	42.49539651	4.540901621	29.73009848	3.420786609	135.3285486	6.633882541	8.993026278	4	2	6	2	0.208496202	-2.742025039	0.584639224	8	4	13.13477005	33.4668	5	1	1	1	1	19	0	0	0	0	10	9	0	0	10	9	0	0	0
C00979	C5H9NO4	19	147.1293	147.0531578	40.8168	6.1656	43.4975	9.52	0	0	0	6.58	44.56706308	5.389365067	26.30638188	3.497805098	130.0368946	6.050316104	10.68105564	4	2	6	3	5.230192493	-3.592096437	-3.582537943	16	16	12.91736621	31.1925	9	2	1	2	4	18	0	0	0	0	10	9	0	0	10	9	0	0	0
C00986	C3H10N2	15	74.1249	74.08439833	48.61	13.5979	0	37.7922	0	0	0	3.67	33.24547679	4.4677879	19.20409622	2.780549524	85.97946079	5.177401091	8.795857771	2	2	2	4	NaN	-5.967422114	-1.362482935	4	4	9.319206095	22.734	1	1	1	1	1	14	0	0	0	0	5	4	0	0	5	4	0	0	0
C01005	C3H8NO6P	19	185.0725	185.0089235	19.4692	4.357	51.8696	7.5682	16.736	0	0	47.44	45.37140668	5.189978936	25.38567002	3.27305566	138.4573532	6.22380025	10.0853976	6	4	8	5	1.497803738	-7.217196484	-3.507777134	32	32	13.70325938	32.9139	12	2	1	2	4	18	0	0	0	0	11	10	0	0	11	10	0	0	0
C01010	C2H4N2O3	11	104.0648	104.022192	23.0831	3.8743	46.1234	26.9192	0	0	0	7.42	34.65858128	4.402009526	16.48636306	2.951012303	80.88466456	3.412611764	8.59628468	3	3	5	4	NaN	-4.243196417	-0.901828476	16	8	7.607256	19.563	13	1	1	1	5	10	0	0	0	0	7	6	0	0	7	6	0	0	0
C01013	C3H6O3	12	90.0779	90.03169406	40.001	6.7138	53.2852	0	0	0	0	3.25	30.49544986	4.207899551	19.4644135	2.742499993	81.49361293	5.272163696	8.310177261	3	2	4	2	0.871144464	-3.528969744	-0.803581024	8	8	7.546188	19.0453	3	1	1	1	2	11	0	0	0	0	6	5	0	0	6	5	0	0	0
C01020	C6H5NO3	15	139.1088	139.026943	51.8042	3.6228	34.5041	10.0689	0	0	0	17.95	45.51716652	5.043475738	20.74390666	3.307103717	114.0041318	3.761583922	9.822783299	4	2	5	2	2.130921257	-2.349633461	0.704048505	8	8	12.46665231	33.4517	35	1	1	1	2	15	1	1	6	6	4	4	0	1	4	4	6	6	0
C01024	C40H46N4O17	107	854.8098	854.2857961	56.2029	5.424	31.8188	6.5543	0	0	0	139.18	217.1986715	12.09002859	96.66585984	8.520634646	728.9938133	9.568981773	23.68796541	17	13	25	13	NaN	-20.75546247	0.967256643	256	15	79.13050566	209.9212	5000	1	1	1	256	110	4	4	20	20	41	44	0	4	41	44	20	20	0
C01031	C11H17N3O7S	39	335.334	335.0787206	39.3988	5.1098	33.3983	12.5308	0	9.5621	0	28.99	87.01745156	8.157818202	49.43501079	5.130143995	280.3239158	9.277038358	16.37067168	8	5	13	6	2.617011348	-8.35634945	-5.274435804	256	12	29.48907417	74.0922	243	4	1	4	623	38	0	0	0	0	22	21	0	0	22	21	0	0	0
C01035	C5H11N3O2	21	145.1597	145.0851266	41.3706	7.638	22.0439	28.9475	0	0	0	10.19	51.6981959	6.11141506	23.3844326	3.323838359	134.1300635	5.53096697	12.01716116	5	4	6	5	8.67549598	-3.370676614	-3.370686514	16	32	13.55833846	46.1724	12	1	1	1	4	20	0	0	0	0	10	9	0	0	10	9	0	0	0
C01037	C9H20N2O2	33	188.2673	188.1524779	57.4164	10.7075	16.9965	14.8796	0	0	0	18.51	65.87054594	6.93701537	33.16932491	4.044115186	198.8291252	5.900346551	13.46916841	4	3	5	5	8.646714903	-3.73111999	-3.237862282	8	16	20.873216	51.2996	3	4	1	4	2	32	0	0	0	0	13	12	0	0	13	12	0	0	0
C01041	C6H7O6	19	175.1162	175.024263	41.1522	4.0291	54.8187	0	0	0	0	26.27	49.17693414	5.32912669	25.81802382	3.672211891	136.483469	5.411025965	10.4024728	5	3	7	3	1.470015115	-4.113414716	-2.5003	32	16	13.983424	47.5824	16	4	1	4	8	19	1	1	5	5	7	7	1	0	12	12	0	0	0
C01051	C40H44N4O16	104	836.7946	836.2752314	57.4129	5.2999	30.5918	6.6954	0	0	0	135.12	153.0458189	8.587229267	103.9217673	6.990454655	708.7707337	14.22319723	15.53439165	16	12	24	12	NaN	-20.58341258	1.388546819	256	13	77.6670714	206.9264	5000	1	1	1	256	108	5	5	24	28	36	36	1	4	40	44	20	20	0
C01054	C30H50O	81	426.7174	426.3861662	84.4402	11.8104	3.7494	0	0	0	0	213.74	149.2981056	13.81783663	65.52883964	6.153355962	479.9374597	11.53405183	27.3750013	1	0	1	0	NaN	9.443276314	9.443276314	2	2	54.89281513	143.4553	1	32	16	2	1	81	1	1	3	3	28	28	1	0	31	31	0	0	0
C01059	C5H5NO2	13	111.0987	111.0320284	54.0542	4.5362	28.8021	12.6074	0	0	0	15.78	36.67994378	4.266686636	20.43157616	3.409092758	94.72848212	4.094436544	8.51277566	3	2	3	2	5.752411759	0.740414059	0.742900276	8	8	10.67740801	28.1764	16	1	1	1	2	13	1	1	6	6	2	2	0	1	2	2	6	6	0
C01063	C28H46N7O19P3S	104	909.687	909.1782026	36.9687	5.0968	33.4168	10.7781	10.2146	3.5248	0	275.75	195.3306372	14.81637202	103.8883023	7.576277197	727.6370818	13.25070745	28.951119	19	10	26	11	2.106088761	-13.32011491	-5.998779472	256	24	78.4774305	196.9043	5000	128	1	128	72	106	3	3	14	15	44	45	1	2	49	50	9	10	0
C01077	C6H11NO4	22	161.1558	161.0688078	44.7171	6.8799	39.7116	8.6914	0	0	0	9.81	53.07743235	5.941498282	25.7226832	3.501069318	147.1391265	6.25193746	12.19076436	4	2	6	3	5.735543454	-3.525051272	-3.523824854	16	16	14.72515577	36.0579	9	2	1	2	4	21	0	0	0	0	11	10	0	0	11	10	0	0	0
C01079	C34H40N4O4	82	568.7058	568.3049558	71.8058	7.0894	11.2532	9.8516	0	0	0	137.78	153.0902121	8.129321013	83.18104761	8.223464993	528.2619994	8.570380915	16.00425321	4	6	6	6	NaN	1.038552799	6.200009446	64	256	62.39965928	169.4162	4640	1	1	1	4	86	5	5	24	28	18	18	1	4	22	26	20	20	0
C01081	C12H18N4O4PS	40	345.334	345.0786373	41.7359	5.2537	18.5321	16.2239	8.9692	9.2852	0	94.09	85.14137725	8.048165139	44.29499516	4.131859946	283.4481071	7.900289352	15.92782302	6	3	7	4	5.928263494	-5.086010394	-5.937216304	128	64	31.35885833	84.2726	720	1	1	1	3	41	2	2	11	11	11	12	0	2	11	12	11	11	0
C01083	C12H22O11	45	342.2965	342.1162115	42.1063	6.4782	51.4155	0	0	0	0	39.03	81.35509874	6.234490051	48.33177789	5.005935236	289.389223	9.75739565	12.00711914	11	8	11	8	4.593517014	-4.703380252	-4.703374864	256	17	28.9697942	68.3367	1	528	1	528	1	46	2	2	12	12	11	12	2	0	23	24	0	0	0
C01092	C9H17NO3	30	187.2362	187.1208434	57.7326	9.1515	25.6351	7.4808	0	0	0	16.61	62.05881176	6.724376084	32.53591799	3.878049263	188.9449031	6.290442015	12.89861626	4	2	6	3	6.423129202	-2.572079347	-2.550230484	32	32	19.44738671	48.7447	6	2	1	2	10	29	0	0	0	0	13	12	0	0	13	12	0	0	0
C01094	C6H13O9P	29	260.1358	260.0297185	27.7025	5.0371	55.3536	0	11.9068	0	0	61.83	60.22194047	5.491267445	38.97476709	4.428706212	198.8365608	7.09565579	10.75019283	8	6	9	6	NaN	-6.119030699	-2.881565349	128	256	19.793746	47.2337	4	16	1	16	1	29	1	1	5	5	11	11	1	0	16	16	0	0	0
C01096	C6H15O9P	31	262.1517	262.0453686	27.4895	5.7673	54.928	0	11.8152	0	0	58.21	61.2536825	5.674955562	40.02051276	4.369860474	209.977869	7.840239189	11.24655135	8	7	9	7	NaN	-6.830070678	-3.85358488	128	128	20.40118551	49.2765	4	16	1	16	1	30	0	0	0	0	16	15	0	0	16	15	0	0	0
C01097	C6H13O9P	29	260.1358	260.0297185	27.7025	5.0371	55.3536	0	11.9068	0	0	61.78	62.95838282	5.750297086	37.67949125	4.44674744	198.8593603	6.904556475	11.0440847	8	6	9	6	NaN	-6.071026526	-2.881565349	128	256	19.793746	47.2337	4	16	1	16	1	29	1	1	5	5	11	11	1	0	16	16	0	0	0
C01100	C6H12N3O4P	26	221.1509	221.0565424	32.586	5.4692	28.9384	19.0006	14.0057	0	0	66.03	59.06696369	6.245640124	28.93999202	3.661022615	177.8476578	6.71834823	12.25475494	5	4	6	5	6.038544918	-2.776839852	-3.113069126	32	32	19.2892197	48.4988	32	2	1	2	2	26	1	1	5	5	9	9	0	1	9	9	5	5	0
C01101	C5H11O8P	25	230.1098	230.0191538	26.0978	4.8183	55.6235	0	13.4604	0	0	53.17	53.7992786	5.812210675	31.18324466	3.639997702	177.7366475	7.052421148	11.03941085	7	5	9	5	NaN	-5.746702785	-2.760262981	256	128	17.37363	42.4722	8	4	1	4	8	24	0	0	0	0	14	13	0	0	14	13	0	0	0
C01102	C4H10NO6P	22	199.0991	199.0245736	24.1301	5.0625	48.2154	7.035	15.557	0	0	50.11	49.27814447	5.64830225	27.67770818	3.281093902	155.4282706	5.880957171	11.17519409	6	4	8	5	1.816316097	-6.793737303	-3.680171862	32	32	15.47243265	37.7793	12	2	1	2	4	21	0	0	0	0	12	11	0	0	12	11	0	0	0
C01103	C10H13N2O11P	37	368.1908	368.0256958	32.6209	3.5588	47.7995	7.6084	8.4124	0	0	99.36	87.74675885	7.030912913	45.3735253	5.405405229	270.8881148	6.708204921	14.01015494	10	6	14	6	NaN	-9.441466448	-2.911181674	256	13	28.08734055	70.7438	204	16	1	16	3	38	2	2	11	11	13	14	1	1	18	19	6	6	0
C01104	C3H9NO	14	75.1097	75.06841392	47.9726	12.0776	21.3014	18.6483	0	0	0	11.45	28.69042288	3.330904388	23.60919262	3.049874893	84.56434247	5.779480079	6.672103033	1	0	2	0	12.51662088	-0.934553265	-0.934205718	2	4	7.928321524	22.033	1	1	1	1	1	13	0	0	0	0	5	4	0	0	5	4	0	0	0
C01107	C6H13O7P	27	228.137	228.0398893	31.5881	5.7436	49.0915	0	13.5768	0	0	56.88	58.07208219	5.623796071	35.35148212	4.286549057	186.2874388	6.654915314	11.17479532	6	4	8	4	NaN	-6.641065206	-1.21694559	32	32	18.25512013	45.3843	12	2	1	2	2	26	0	0	0	0	14	13	0	0	14	13	0	0	0
C01115	C6H10O6	22	178.14	178.0477381	40.4537	5.6581	53.8882	0	0	0	0	24.3	45.9422053	4.916143398	30.96172856	3.957948902	147.2844767	6.785006346	9.959246029	5	4	6	4	4.374459992	-2.745283509	-2.745273186	64	32	14.63318877	34.7788	3	16	1	16	1	22	1	1	5	5	7	7	1	0	12	12	0	0	0
C01118	C8H13NO6	28	219.1919	219.0742872	43.8363	5.978	43.7956	6.3902	0	0	0	26.92	64.95804576	7.386637397	32.01080552	3.812773073	191.7073806	6.843039565	14.21161466	6	3	9	4	2.711810657	-6.501251008	-3.748041624	128	64	19.05769245	46.9512	27	2	1	2	8	27	0	0	0	0	15	14	0	0	15	14	0	0	0
C01120	C18H40NO5P	65	381.4877	381.2644099	56.6709	10.5685	20.9697	3.6716	8.1192	0	0	94.43	126.4610961	12.47364819	49.0341468	5.325924181	391.9326769	7.471622841	24.72411434	5	4	6	5	3.733207026	3.431340795	3.304745433	16	16	40.9080695	101.8023	4	4	1	4	1	64	0	0	0	0	25	24	0	0	25	24	0	0	0
C01134	C11H23N2O7PS	45	358.348	358.0963583	36.8685	6.4693	31.2534	7.8174	8.6435	8.948	0	75.54	90.80663428	8.220447232	49.49007043	4.634645077	306.8165459	8.257277602	16.23677541	6	6	9	6	0.162666647	-4.432091728	-1.656847762	256	11	32.26998959	81.5778	36	2	1	2	12	44	0	0	0	0	22	21	0	0	22	21	0	0	0
C01137	C14H23N6O3S	47	355.436	355.1552343	47.308	6.5223	13.504	23.6443	0	9.0213	0	67.55	100.6536832	7.09852988	53.46019824	6.147422689	309.2763376	8.377380153	14.17931008	8	4	8	6	13.12135813	-0.989087725	-2.75010497	256	15	36.11929123	90.405	79	32	1	32	3	49	3	3	14	15	10	11	1	2	15	16	9	10	0
C01143	C6H14O10P2	32	308.1169	308.0062197	23.3886	4.5798	51.9264	0	20.1052	0	0	106.42	67.26915528	6.371389042	39.26741468	3.995633241	231.3010073	8.814290834	11.91327482	8	5	11	5	NaN	-9.250932525	-1.638744069	64	64	23.0614596	56.2572	51	4	1	4	2	31	0	0	0	0	18	17	0	0	18	17	0	0	0
C01149	C7H16NO	25	130.208	130.1231891	64.5697	12.3856	12.2876	10.7572	0	0	0	28.14	46.57401228	5.287477238	28.05956291	3.345677335	149.2827022	6.32129568	10.36954198	1	0	2	0	NaN	-4.127126146	-4.127126153	4	4	15.15744789	50.5153	2	1	1	1	2	24	0	0	0	0	9	8	0	0	9	8	0	0	0
C01152	C7H11N3O2	23	169.1811	169.0851266	49.6952	6.5535	18.9139	24.8373	0	0	0	26.36	49.95252367	5.342569542	30.75110426	3.784206106	152.5943179	6.210971956	10.44130816	4	2	5	3	7.952164592	-3.600714079	-3.543107842	16	16	16.52204292	42.9557	24	2	1	2	4	23	1	1	5	5	7	7	0	1	7	7	5	5	0
C01157	C5H9NO3	18	131.1299	131.0582432	45.797	6.9179	36.6036	10.6815	0	0	0	14.21	39.80593308	4.573846568	26.44864773	3.245077556	116.4274288	5.945181287	8.964221898	4	3	5	3	6.655313353	-3.853271041	-3.853201096	16	16	11.98282063	29.3822	3	4	1	4	4	18	1	1	5	5	4	4	1	0	9	9	0	0	0
C01159	C3H8O10P2	23	266.0371	265.9592695	13.544	3.031	60.1397	0	23.2853	0	0	92.24	56.20462844	5.328736915	39.02528103	4.174241331	180.1365356	7.726643326	10.72824653	8	5	11	5	NaN	-11.71751661	-1.765871547	64	64	17.66305988	42.1293	48	2	1	2	2	22	0	0	0	0	15	14	0	0	15	14	0	0	0
C01161	C8H8O4	20	168.1467	168.0422587	57.1439	4.7955	38.0606	0	0	0	0	20.56	50.53143201	5.264033183	30.01761998	3.636572305	143.5401451	6.183843203	9.931363932	4	3	5	3	NaN	-2.152535997	1.003863462	8	8	15.80836821	41.3274	42	1	1	1	2	20	1	1	6	6	6	6	0	1	6	6	6	6	1
C01165	C5H9NO3	18	131.1299	131.0582432	45.797	6.9179	36.6036	10.6815	0	0	0	8.28	40.72927121	4.857961562	25.52512069	3.181897979	121.142638	5.973108925	9.653742368	4	2	6	3	5.607942815	-3.492010062	-3.489278212	32	32	12.1488892	30.3623	6	2	1	2	16	17	0	0	0	0	9	8	0	0	9	8	0	0	0
C01168	C9H13N2O9P	34	324.1813	324.0358665	33.3444	4.0419	44.4179	8.6413	9.5545	0	0	84.71	79.395726	6.156804972	44.6547059	4.886699096	242.0533965	6.905832854	12.27589093	8	6	11	6	NaN	-6.408016961	-3.223713894	256	11	25.50913867	63.3139	64	16	1	16	6	35	2	2	11	11	10	11	1	1	15	16	6	6	0
C01170	C17H27N3O17P2	66	607.3537	607.0815695	33.6183	4.4808	44.7828	6.9186	10.1996	0	0	168.7	108.7602439	7.363195723	83.65563974	6.051872471	462.2295664	11.99404943	12.95737369	14	9	19	9	0.461490595	-10.02368718	-5.284643272	256	23	48.47945565	117.5571	1056	2048	1	2048	9	68	3	3	17	17	22	24	2	1	33	35	6	6	0
C01171	C6H13O9P	29	260.1358	260.0297185	27.7025	5.0371	55.3536	0	11.9068	0	0	58.67	67.24608785	5.55031311	39.21996021	5.129384111	199.168228	6.503260946	10.61633545	8	6	9	6	NaN	-6.269104493	-3.056105249	128	13	19.793746	46.7963	4	32	1	32	1	29	1	1	6	6	10	10	1	0	16	16	0	0	0
C01172	C6H13O9P	29	260.1358	260.0297185	27.7025	5.0371	55.3536	0	11.9068	0	0	58.95	65.37551512	5.884061029	37.07233092	4.584723203	199.2755683	7.093832759	11.5967331	8	6	9	6	NaN	-6.244320586	-3.056105249	128	256	19.793746	46.7963	4	32	1	32	1	29	1	1	6	6	10	10	1	0	16	16	0	0	0
C01177	C6H13O9P	29	260.1358	260.0297185	27.7025	5.0371	55.3536	0	11.9068	0	0	59.85	63.74517692	5.636281683	35.66238061	4.208247379	198.7160153	6.489448973	11.16693613	8	7	9	7	NaN	-7.139288028	-3.905575683	128	128	19.73275306	46.6479	4	32	1	32	1	29	1	1	6	6	10	10	1	0	16	16	0	0	1
C01179	C9H8O4	21	180.1574	180.0422587	60.001	4.4758	35.5232	0	0	0	0	20.79	51.55806663	5.236626238	32.51673015	3.74164256	154.2419781	7.089136066	10.33425373	4	2	6	2	NaN	-1.827621856	1.596648451	16	8	17.10813301	44.6925	25	1	1	1	2	21	1	1	6	6	7	7	0	1	7	7	6	6	1
C01180	C5H8O3S	17	148.18	148.0194148	40.5274	5.4417	32.3918	0	0	21.6392	0	11.22	46.39578816	5.448761042	25.79153264	3.304503167	127.9450241	5.844485301	10.60935795	3	1	5	1	NaN	-2.17993656	1.12401725	8	4	13.68134131	35.0709	5	1	1	1	6	16	0	0	0	0	9	8	0	0	9	8	0	0	0
C01181	C7H16NO2	26	146.2074	146.1181038	57.5039	11.0302	21.8859	9.58	0	0	0	27.77	49.83229475	5.662557379	28.59341577	3.342444627	157.6354984	7.240568795	11.0270551	2	1	3	1	NaN	-3.433355553	-3.968509901	2	4	15.61479131	51.4407	3	1	1	1	2	25	0	0	0	0	10	9	0	0	10	9	0	0	0
C01185	C11H15NO9P	37	336.2119	336.0484426	39.296	4.4969	42.8285	4.166	9.2126	0	0	82.96	85.6537933	6.290420935	47.8712119	5.500529368	261.7119213	7.302775776	11.06818906	8	5	10	5	1.979873468	-9.244159227	-5.437405301	256	13	27.7921357	69.8852	60	16	1	16	1	38	2	2	11	11	11	12	1	1	16	17	6	6	0
C01189	C27H46O	74	386.6535	386.3548661	83.8707	11.9914	4.1379	0	0	0	0	109.07	121.6540802	10.85541049	45.80549108	4.458187838	427.9899653	6.829578612	21.42018173	1	1	1	1	8.513787729	7.112889029	7.112889031	2	2	47.97796296	120.6165	1	256	1	256	1	77	4	4	17	20	11	11	4	0	28	31	0	0	4
C01192	C19H37O7P	64	408.4666	408.2276901	55.8683	9.1302	27.4186	0	7.5829	0	0	94.12	132.459323	15.04101987	51.2467309	5.382542977	401.3206308	7.684678315	29.41338041	5	2	8	2	NaN	2.056054503	5.269271587	64	32	41.51351351	104.0635	24	1	1	1	3	63	0	0	0	0	27	26	0	0	27	26	0	0	0
C01197	C9H8O4	21	180.1574	180.0422587	60.001	4.4758	35.5232	0	0	0	0	28.95	59.63435618	6.063275478	27.51509201	3.759343017	153.0889882	4.90305298	12.02816674	4	3	5	3	NaN	-1.606705894	1.528955617	8	8	17.45209754	47.0217	100	2	2	1	2	21	1	1	6	6	7	7	0	1	7	7	6	6	1
C01217	C30H45N6O16P	98	776.6827	776.2629659	46.3923	5.8399	32.9595	10.8204	3.988	0	0	170.14	185.6849423	15.27072897	86.94141846	6.077345072	652.3770237	12.48720175	30.21286683	19	13	23	14	3.318887947	-11.77822156	-7.21942118	256	27	69.82801677	187.7135	2240	4096	1	4096	24	101	4	4	21	22	32	34	2	2	41	44	12	12	1
C01220	C6H14O12P2	34	340.1157	339.9960489	21.1881	4.1489	56.4493	0	18.2137	0	0	109.28	73.86612558	6.626415241	43.03817281	4.285892631	243.7558243	7.605396141	13.25350278	10	8	12	8	NaN	-10.49653754	-4.029141715	256	256	24.40918145	57.5208	16	20	1	20	1	34	1	1	6	6	14	14	1	0	20	20	0	0	1
C01227	C19H28O2	49	288.4244	288.2089301	79.1207	9.785	11.0943	0	0	0	0	77.01	84.01744486	7.079119794	39.21235602	4.064367634	293.0468997	7.161919075	14.24505127	2	1	3	1	8.406006314	3.361705055	3.361705055	8	4	33.2600637	84.6589	2	64	1	64	2	52	4	4	17	20	4	4	4	0	21	24	0	0	4
C01228	C10H17N5O17P4	53	603.1603	602.9569902	19.9129	2.8409	45.0941	11.6111	20.541	0	0	237.47	109.1579616	8.743853294	68.26353478	6.117594257	403.4163856	9.65751227	17.27762197	16	9	21	10	1.053888987	-11.47318496	-4.415995337	256	16	43.21117646	108.1127	5000	64	1	64	6	55	3	3	14	15	22	23	1	2	27	28	9	10	0
C01230	C30H52O7P2	91	586.6772	586.318827	61.4172	8.9339	19.0899	0	10.559	0	0	189.39	169.1822802	15.2166751	79.40252655	5.907436144	573.2224635	10.19496207	29.87099774	5	3	7	3	NaN	3.714613556	8.595875886	8	8	63.79878647	168.1383	17	64	32	2	1	90	0	0	0	0	39	38	0	0	39	38	0	0	0
C01233	C5H14NO6P	27	215.1415	215.0558737	27.9135	6.559	44.6201	6.5105	14.3969	0	0	52.5	57.17204341	5.717838877	39.00879384	4.378045398	179.3591039	7.432559745	11.63719404	5	4	6	5	4.807993766	-3.789587492	-3.726616782	16	16	18.15529856	43.8211	5	4	1	4	1	26	0	0	0	0	13	12	0	0	13	12	0	0	0
C01236	C6H11O9P	27	258.1199	258.0140685	27.9189	4.2954	55.7859	0	11.9998	0	0	68.07	63.7501376	6.025998758	35.05135757	4.492255844	192.7534021	5.694850262	11.96804116	7	5	9	5	NaN	-5.991074569	-2.868839217	128	64	19.27974316	45.6517	12	16	1	16	1	27	1	1	6	6	10	10	1	0	16	16	0	0	0
C01243	C6H15O15P3	39	420.0956	419.9623793	17.1542	3.599	57.1277	0	22.1191	0	0	153.74	86.60847833	6.762645673	50.74461741	5.060261555	288.6520183	6.912829885	13.05598962	12	9	15	9	NaN	-14.13337634	-4.152707746	256	13	29.10163267	68.3937	64	64	1	64	1	39	1	1	6	6	18	18	1	0	24	24	0	0	1
C01245	C6H15O15P3	39	420.0956	419.9623793	17.1542	3.599	57.1277	0	22.1191	0	0	156.54	82.86778621	6.73568613	50.43012211	4.794025401	288.7315582	7.310941314	12.35494024	12	9	15	9	NaN	-14.13337634	-4.152707746	256	13	29.10163267	68.3937	64	64	1	64	1	39	1	1	6	6	18	18	1	0	24	24	0	0	1
C01246	C31H55O9P	96	602.7368	602.3583699	61.7735	9.1975	23.8901	0	5.1389	0	0	181.06	165.2474906	11.78899843	82.13682556	5.807404957	595.3724156	13.28779116	24.36775185	7	5	8	5	NaN	3.195654705	5.571630684	64	256	64.44057151	164.9112	5	1024	8	128	1	96	1	1	6	6	35	35	1	0	41	41	0	0	0
C01250	C7H11NO4	23	173.1665	173.0688078	48.5515	6.4027	36.9573	8.0886	0	0	0	11.78	49.4957854	4.957431376	38.0792826	4.431326349	156.8916627	6.960082795	9.586882202	4	2	7	2	1.282337709	-4.35532459	-1.271631669	64	64	15.58350539	39.8061	18	2	1	2	71	22	0	0	0	0	12	11	0	0	12	11	0	0	0
C01251	C7H10O7	24	206.1501	206.0426527	40.7833	4.8894	54.3273	0	0	0	0	14.15	54.35781024	5.89919931	33.65530795	3.891896129	171.3093939	6.968708824	11.61705959	7	4	10	4	NaN	-9.152603659	-1.034026247	32	64	16.25254459	40.3789	27	2	1	2	4	23	0	0	0	0	14	13	0	0	14	13	0	0	0
C01259	C9H21N2O3	35	205.2746	205.1552175	52.6594	10.3114	23.3824	13.6468	0	0	0	34.96	65.75255339	6.809592556	33.47692558	3.743183563	212.470009	6.893029204	13.59054807	4	3	5	4	11.81311245	-6.985874539	-7.43244449	16	16	21.46515487	65.1539	3	4	1	4	6	34	0	0	0	0	14	13	0	0	14	13	0	0	0
C01260	C20H28N10O19P4	81	836.387	836.0482648	28.7204	3.3743	36.3454	16.7467	14.8131	0	0	290.74	152.7226705	8.400563302	95.19672578	6.959379185	593.1526058	11.89803024	16.93963588	22	10	26	12	2.784175923	-14.16600617	-11.43637935	256	23	66.6772944	166.1038	3545	2080	1	2080	6	86	6	6	28	30	25	28	2	4	35	38	18	20	0
C01267	C6H9N2O5P	23	220.1198	220.0249079	32.7386	4.1211	36.3425	12.7264	14.0713	0	0	64.69	56.91950939	6.145485297	32.70381449	4.035382849	167.885339	7.306805771	12.08927258	5	3	7	3	3.493848265	-3.941373555	-3.261846463	128	64	17.95954646	46.0746	64	1	1	1	6	23	1	1	5	5	9	9	0	1	9	9	5	5	0
C01268	C9H15N4O9P	38	354.2106	354.0576646	30.5175	4.2684	40.6523	15.8174	8.7444	0	0	88.08	87.92656565	6.614900448	48.3186324	5.323195279	264.4914035	6.511400658	13.05397288	10	8	13	9	2.234874011	-6.901958707	-5.558358358	256	13	27.86173913	79.8773	140	16	1	16	9	39	2	2	11	11	12	13	1	1	17	18	6	6	0
C01269	C10H13O10P	34	324.178	324.0246331	37.0497	4.042	49.3538	0	9.5546	0	0	83.51	75.98543605	5.986266685	47.75806084	5.526805449	247.8370714	7.298604135	11.57690697	9	5	12	5	NaN	-10.16482569	-1.117946039	64	32	25.77793371	65.5819	112	8	1	8	3	34	1	1	6	6	15	15	1	0	21	21	0	0	1
C01272	C6H16O18P4	44	500.0755	499.9287098	14.4107	3.2249	57.5891	0	24.7753	0	0	201.75	93.54706104	6.83911623	59.4945852	5.997677834	333.8927195	8.227630493	12.07753166	14	10	18	10	NaN	-17.77266687	-4.276273777	256	16	33.802596	79.2666	256	32	1	32	1	44	1	1	6	6	22	22	1	0	28	28	0	0	1
C01284	C6H17O21P5	49	580.0554	579.8950402	12.4237	2.954	57.9233	0	26.699	0	0	246.87	111.9074986	6.888851997	59.33233577	6.119794785	378.7470326	7.188237318	12.57509733	16	11	21	11	NaN	-18.36175046	-4.399839809	256	18	38.50862059	90.1395	768	32	1	32	1	49	1	1	6	6	26	26	1	0	32	32	0	0	1
C01289																												14
C01300	C7H9N5O2	23	195.1787	195.0756246	43.0759	4.6478	16.3946	35.8817	0	0	0	27.64	58.40379088	6.003051633	29.216462	4.127678944	157.6028756	4.990221401	12.06980689	7	4	7	5	6.456274443	-0.563533195	-0.563403073	128	256	17.6944414	54.1959	93	1	1	1	29	24	2	2	10	11	4	4	1	1	8	9	6	6	0
C01302	C12H16NO9P	39	349.2305	349.0562676	41.2703	4.6179	41.232	4.0107	8.8691	0	0	82.08	93.60338893	8.512672799	41.63383922	5.231190772	279.327516	6.049009453	16.08045451	9	6	12	6	0.861376013	-5.839493742	-0.502219948	256	256	29.63082985	77.7189	192	4	1	4	8	39	1	1	6	6	17	17	0	1	17	17	6	6	1
C01304	C9H16N5O8P	39	353.2258	353.073649	30.6026	4.5656	36.2361	19.8268	8.7688	0	0	81.13	89.65274719	6.607685256	50.22156161	5.479123636	268.0194376	6.518004571	13.0707184	11	8	13	10	2.746017711	-6.829687333	-5.832898605	256	14	28.42490435	82.0565	148	16	1	16	9	40	2	2	11	11	12	13	1	1	17	18	6	6	0
C01344	C10H14N4O10P2	40	412.1865	412.0185157	29.139	3.4235	38.8159	13.5926	15.029	0	0	143	92.07086395	8.493542443	44.51472697	4.65950432	293.8289358	7.485136208	16.99237061	10	5	13	5	1.13600546	-7.00869641	-2.330256022	256	256	31.80839078	81.5669	1173	16	1	16	3	42	3	3	14	15	12	13	1	2	17	18	9	10	0
C01345	C10H15N4O13P3	45	492.1664	491.9848461	24.4037	3.0719	42.2605	11.3837	18.8801	0	0	190.93	101.821134	9.041318425	49.90064127	4.879134287	338.6950404	8.102968829	18.03541885	12	6	16	6	1.112140622	-9.803768906	-3.054102146	256	11	36.61569237	92.4398	4774	32	1	32	3	47	3	3	14	15	16	17	1	2	21	22	9	10	0
C01346	C9H14N2O11P2	38	388.1618	388.0072823	27.8483	3.6354	45.3402	7.2169	15.9592	0	0	132.7	86.84509645	7.587295428	45.77718436	4.838383227	279.0030235	8.235497112	14.85857254	9	5	13	5	NaN	-6.941807514	-2.059968589	128	128	29.57112608	72.8007	272	16	1	16	3	39	2	2	11	11	13	14	1	1	18	19	6	6	0
C01352	C27H35N9O15P2	88	787.5656	787.1727845	41.1761	4.4794	30.4725	16.0063	7.8657	0	0	280.3	168.4516712	9.085605133	88.2172282	7.401198705	613.9881975	11.55906266	18.43868146	18	11	22	12	2.909517027	-7.482848017	-5.568938793	256	23	68.6469812	188.7976	5000	512	1	512	18	93	6	6	28	31	25	27	2	4	32	36	21	22	1
C01384	C4H4O4	12	116.0722	116.0109586	41.3904	3.4735	55.136	0	0	0	0	23.56	36.29927458	4.466243295	21.38564236	3.084491018	93.01906073	4.569513162	8.890921691	4	2	6	2	NaN	-4.552266087	-0.040914331	4	4	9.126	24.607	8	2	2	1	4	11	0	0	0	0	8	7	0	0	8	7	0	0	0
C01412	C4H8O	13	72.1057	72.05751488	66.6283	11.1829	22.1888	0	0	0	0	5.04	29.50145928	4.031843075	18.77771697	2.694266663	81.44852289	5.218016708	7.978357881	1	0	2	0	NaN	0.763142545	0.763142545	4	2	8.1685444	20.9462	2	1	1	1	2	12	0	0	0	0	5	4	0	0	5	4	0	0	0
C01416	C17H21NO4	43	303.3529	303.1470582	67.3084	6.9776	21.0967	4.6173	0	0	0	64.78	81.66555189	7.016989597	47.84011274	4.749483083	282.4552556	8.669001255	13.94029932	3	0	5	0	12.73400563	0.439676166	2.282108009	8	4	32.16748313	81.1604	30	16	1	16	1	45	3	3	14	15	8	9	2	1	16	18	6	6	1
C01419	C5H10N2O3S	21	178.21	178.0412129	33.6982	5.6559	26.9335	15.7193	0	17.9928	0	11.42	51.89906406	6.036017192	24.64691232	3.282012514	151.1691382	5.228936464	11.9244652	4	4	6	5	5.989280984	-4.367273467	-4.341426625	64	128	16.3713347	41.0271	9	2	1	2	29	20	0	0	0	0	11	10	0	0	11	10	0	0	0
C01454	C8H8O2	18	136.1479	136.0524295	70.5744	5.9226	23.503	0	0	0	0	20.13	50.30259261	5.256127065	21.69883667	3.466089022	126.5858756	4.267367267	10.11644679	2	1	3	1	NaN	-0.527396459	2.144250113	2	2	14.41631036	38.3554	10	1	1	1	1	18	1	1	6	6	4	4	0	1	4	4	6	6	1
C01467	C7H8O	16	108.1378	108.0575149	77.7479	7.4567	14.7954	0	0	0	0	17.72	41.59560208	4.221604986	23.04798598	3.638448713	107.3176297	4.451381738	8.407894908	1	1	1	1	NaN	2.182785046	2.183101884	2	2	12.70461932	33.0801	7	1	1	1	1	16	1	1	6	6	2	2	0	1	2	2	6	6	1
C01468	C7H8O	16	108.1378	108.0575149	77.7479	7.4567	14.7954	0	0	0	0	17.71	41.48272992	4.443463741	22.37638952	3.537312685	107.3167382	4.047445097	8.835146341	1	1	1	1	NaN	2.182912224	2.183101884	2	2	12.70392603	33.0801	5	1	1	1	1	16	1	1	6	6	2	2	0	1	2	2	6	6	1
C01494	C10H10O4	24	194.184	194.0579088	61.8522	5.1906	32.9572	0	0	0	0	32.55	64.24452777	6.023714672	30.32530931	4.197737225	170.6498668	5.867010923	12.00464736	4	2	5	2	NaN	-1.381003795	1.674849673	8	8	19.34981598	51.504	100	2	2	1	2	24	1	1	6	6	8	8	0	1	8	8	6	6	1
C01499	C10H16O	27	152.2334	152.1201151	78.8966	10.5936	10.5098	0	0	0	0	31.97	58.55934461	5.773068503	31.15387948	3.854107862	167.9487236	5.410248682	11.3248116	1	0	2	0	NaN	2.664041582	2.664041582	2	4	18.76297619	50.1241	3	2	2	1	6	26	0	0	0	0	11	10	0	0	11	10	0	0	0
C01504	C9H8O	18	132.1592	132.0575149	81.7925	6.1014	12.1062	0	0	0	0	23.21	46.64831233	4.391269187	25.08764066	3.840320334	122.9466628	4.855009396	8.787286109	1	0	2	0	NaN	1.836556003	1.836556003	4	2	15.17863061	39.7257	10	1	1	1	3	19	2	2	9	10	1	1	1	1	4	5	6	6	2
C01507	C6H14O6	26	182.1718	182.0790382	39.5584	7.7461	52.6955	0	0	0	0	14.03	48.81674859	4.775336544	36.12094018	4.190011964	165.0245644	6.366808606	9.323472686	6	6	6	6	4.985128684	-3.730019976	-3.730018849	64	64	15.77614694	38.4036	1	10	1	10	1	25	0	0	0	0	12	11	0	0	12	11	0	0	0
C01508	C5H10O5	20	150.1299	150.0528234	40.001	6.7138	53.2852	0	0	0	0	12.92	41.85426064	4.324638278	28.82116663	3.691423311	128.5983794	5.54038315	8.600732948	5	4	5	4	4.068107334	-2.302225495	-2.302204276	32	64	12.6405	29.9609	1	16	1	16	1	20	1	1	6	6	4	4	1	0	10	10	0	0	0
C01516	C17H19NO3	40	285.3377	285.1364935	71.558	6.7116	16.8215	4.9088	0	0	0	73.69	70.10724568	5.98673702	49.62687552	4.801562343	255.6711376	7.908326803	11.22967486	4	2	4	2	9.65751213	-0.986202089	0.892018535	16	16	30.69898744	80.1224	14	32	1	32	1	44	5	5	18	22	3	3	4	1	15	19	6	6	3
C01530	C18H36O2	56	284.4772	284.2715304	75.9965	12.7553	11.2483	0	0	0	0	30.77	115.4659717	13.416664	30.10885718	3.344851127	327.7167277	6.100613343	26.82358787	2	1	3	1	NaN	5.107968657	7.145720108	2	4	34.4028304	86.2856	3	1	1	1	2	55	0	0	0	0	20	19	0	0	20	19	0	0	0
C01551	C4H6N4O3	17	158.1154	158.0439901	30.3846	3.8248	30.3564	35.4341	0	0	0	25.96	44.33707669	4.903033121	27.56513477	3.731868493	119.5760758	5.560930569	9.653188698	3	4	6	5	1.293199637	-3.391788221	-2.360540882	128	64	12.4722	32.0225	36	2	1	2	24	17	1	1	5	5	6	6	1	0	11	11	0	0	0
C01575	C10H15NO	27	165.2322	165.1153641	72.6898	9.1502	9.683	8.477	0	0	0	26.4	56.23387775	5.834456825	32.85497637	3.701284135	171.1828582	6.611284199	11.30287503	2	2	2	2	11.70274044	-1.13245679	1.317834728	4	4	19.85272993	49.6873	1	4	1	4	1	27	1	1	6	6	6	6	0	1	6	6	6	6	1
C01582	C6H12O6	24	180.1559	180.0633881	40.001	6.7138	53.2852	0	0	0	0	17.68	48.17323637	4.78468161	34.98980607	4.208306582	154.3210058	7.053142769	8.446073576	6	5	6	5	4.219934327	-2.932561057	-2.932539218	64	128	15.15588267	35.9234	1	32	1	32	1	24	1	1	6	6	6	6	1	0	12	12	0	0	0
C01595	C18H32O2	52	280.4455	280.2402303	77.089	11.501	11.41	0	0	0	0	37.96	101.695821	8.028161509	59.1736866	6.320141401	312.4336554	10.61701291	16.92634191	2	1	3	1	NaN	4.418829151	6.421876794	2	4	33.9285481	88.5188	3	4	4	1	2	51	0	0	0	0	20	19	0	0	20	19	0	0	0
C01596	C4H5NO3	13	115.0874	115.026943	41.7446	4.379	41.7059	12.1705	0	0	0	27.09	37.50788097	4.449790934	20.98016774	3.027522576	95.55480858	4.587928791	8.623906995	3	2	5	3	1.841084645	-4.137060761	-0.847856945	8	32	9.7348704	26.4292	13	2	2	1	9	12	0	0	0	0	8	7	0	0	8	7	0	0	0
C01598	C13H16N2O2	33	232.2783	232.1211778	67.2207	6.943	13.7761	12.0603	0	0	0	46.15	75.26272473	6.538926325	44.54560704	5.402537206	216.2503571	6.514198067	12.59550208	2	2	3	2	7.404995704	1.147612782	1.147612787	16	16	26.62495252	66.2799	123	1	1	1	3	34	2	2	9	10	8	8	0	2	8	8	9	10	1
C01606	C8H6O4	18	166.1308	166.0266087	57.8373	3.6403	38.5224	0	0	0	0	32.65	55.53020414	4.716956323	25.8767194	4.282977371	137.8507657	3.495511076	9.422010008	4	2	6	2	NaN	-3.650529677	1.288411632	4	4	15.08417057	40.5704	36	1	1	1	1	18	1	1	6	6	6	6	0	1	6	6	6	6	1
C01613	C24H42O21	87	666.5777	666.2218584	43.2443	6.3509	50.4048	0	0	0	0	96.14	148.8733887	9.019755789	83.61061696	6.639882835	559.9789254	9.916185545	17.00386101	21	14	21	14	4.440070162	-8.070516525	-8.070506255	256	24	56.59840764	133.6007	1	ERROR	ERROR	ERROR	1	90	4	4	23	23	22	25	4	0	45	48	0	0	0
C01659	C3H5NO	10	71.0779	71.03711379	50.6938	7.0904	22.5097	19.7061	0	0	0	7.77	29.27375778	3.820333439	16.30367922	2.873283971	68.06918276	3.633947175	7.615941458	1	1	2	2	8.764882847	-0.273995613	-0.273995321	4	4	7.234115789	19.1136	4	1	1	1	3	9	0	0	0	0	5	4	0	0	5	4	0	0	0
C01694	C28H44O	73	396.6484	396.339216	84.7853	11.181	4.0336	0	0	0	0	131.34	126.7604214	10.1650939	45.01519436	4.762937976	430.2930709	6.366234389	20.25251693	1	1	1	1	8.458372562	6.632406988	6.632406989	2	2	49.35669825	127.1317	1	512	2	256	1	76	4	4	17	20	12	12	4	0	29	32	0	0	4
C01697	C6H14O6	26	182.1718	182.0790382	39.5584	7.7461	52.6955	0	0	0	0	13.46	52.01493664	4.979087467	34.75948368	4.051590405	164.9477534	6.733846943	9.506112784	6	6	6	6	4.985128684	-3.730019976	-3.730018849	64	64	15.77614694	38.4036	1	10	1	10	1	25	0	0	0	0	12	11	0	0	12	11	0	0	0
C01724	C30H50O	81	426.7174	426.3861662	84.4402	11.8104	3.7494	0	0	0	0	152.27	128.4002555	10.51431867	49.38969332	4.414628647	472.4775028	7.544445605	20.94569435	1	1	1	1	9.383180349	7.706672517	7.706672521	2	2	53.28345607	134.5447	1	128	1	128	1	84	4	4	17	20	14	14	4	0	31	34	0	0	4
C01762	C10H12N4O6	32	284.2255	284.0756841	42.2576	4.2555	33.7747	19.7121	0	0	0	54.61	75.39982742	6.372894699	37.37555042	4.522100423	220.1746478	6.437677948	12.96447839	7	5	9	5	4.555003019	-1.81035272	-1.806332253	128	128	23.752626	62.2085	86	16	1	16	6	34	3	3	14	15	6	7	1	2	11	12	9	10	0
C01767	C10H14O	25	150.2176	150.1044651	79.9553	9.3938	10.6508	0	0	0	0	34.95	48.36876233	5.004622225	32.0099247	3.733712866	156.9447072	7.210942779	9.76973333	1	0	2	0	8.144086622	2.55252929	2.55252929	2	4	18.02367239	47.1735	3	2	1	2	5	25	1	1	6	6	5	5	1	0	11	11	0	0	1
C01788	C15H25N3O14P2	59	533.3182	533.0811755	33.7811	4.7249	41.9996	7.879	11.6155	0	0	162.06	107.6619407	7.374028197	70.29947856	5.626883883	409.0557014	9.517837181	14.10487921	13	7	16	8	1.214997392	-8.379946446	-3.938763522	256	18	43.36073117	105.7942	396	1024	1	1024	3	61	3	3	17	17	17	19	2	1	28	30	6	6	0
C01801	C5H10O4	19	134.1305	134.0579088	44.7724	7.5146	47.7129	0	0	0	0	14.04	41.99651647	4.336989417	28.3547954	3.77715303	119.5564777	6.040763632	8.512235394	4	3	4	3	4.763409885	-1.401568103	-1.401566213	16	16	11.92347222	28.4502	1	8	1	8	1	19	1	1	5	5	4	4	1	0	9	9	0	0	0
C01825	C6H12O6	24	180.1559	180.0633881	40.001	6.7138	53.2852	0	0	0	0	15.67	49.66719673	5.024960114	31.16661432	3.957449523	154.3841306	5.649947559	9.657774736	6	5	6	5	4.219934327	-2.932561057	-2.932539218	64	128	15.15588267	35.9234	1	32	1	32	1	24	1	1	6	6	6	6	1	0	12	12	0	0	0
C01832	C33H58N7O17P3S	119	949.837	949.2822737	41.7285	6.1548	28.6354	10.3225	9.7829	3.3758	0	280.81	211.4404252	15.932383	103.5300989	7.153417824	801.3195781	12.89530454	31.90799562	17	9	23	10	2.120196387	-7.086187809	-2.453215407	256	23	86.8068004	218.2439	5000	128	1	128	36	121	3	3	14	15	47	48	1	2	52	53	9	10	0
C01847	C17H23N4O9P	54	458.3597	458.1202649	44.5462	5.0577	31.4152	12.2233	6.7575	0	0	130.51	122.430893	9.128276181	56.83772998	6.632161879	370.3649461	9.322791	18.32039095	10	8	13	8	0.487662675	-4.103310834	-1.113340161	256	15	40.57440616	118.5081	2024	8	1	8	6	56	3	3	14	16	17	17	1	2	19	21	12	12	1
C01902	C30H50O	81	426.7174	426.3861662	84.4402	11.8104	3.7494	0	0	0	0	297.81	125.642351	10.39872955	57.13148331	4.933013138	469.7270393	8.077846921	20.35090833	1	1	1	1	9.334588487	7.547662377	7.547662379	2	2	52.77743603	132.0332	1	512	1	512	1	85	5	5	18	22	13	13	5	0	31	35	0	0	5
C01909	C10H18N2O3	33	214.2615	214.1317425	56.0563	8.4677	22.4017	13.0744	0	0	0	30.18	72.55811223	7.434912471	33.63986405	4.053908282	205.4771445	6.553978038	14.2165771	3	3	5	3	1.441785168	-1.612728118	0.725698666	16	32	21.348756	54.398	12	4	1	4	6	33	1	1	5	5	10	10	1	0	15	15	0	0	0
C01920	C31H50N7O17P3S	109	917.752	917.2196734	40.57	5.4914	29.6365	10.6834	10.1249	3.4939	0	273.01	187.0581873	11.19398675	104.757165	8.006790491	751.070075	11.03659958	22.01624309	17	9	23	10	2.120196383	-8.508504759	-3.875532358	256	23	82.67452679	210.6138	5000	256	2	128	36	111	3	3	14	15	45	46	1	2	50	51	9	10	0
C01929	C6H9N3O	19	139.1552	139.0745619	51.7869	6.519	11.4975	30.1966	0	0	0	21.2	44.31108982	5.138905145	25.53227191	3.366009786	126.505166	5.484678335	10.25288247	3	2	4	3	10.28815255	-1.818185248	-1.169647801	32	32	14.27953826	36.5679	16	2	1	2	8	19	1	1	5	5	5	5	0	1	5	5	5	5	0
C01943	C30H50O	81	426.7174	426.3861662	84.4402	11.8104	3.7494	0	0	0	0	138.71	129.2806847	10.2786974	52.52852673	5.341471098	472.3505807	7.27768235	20.52943081	1	1	1	1	8.95234114	7.673624435	7.673624438	2	2	53.28345607	133.6227	1	256	1	256	1	84	4	4	17	20	14	14	4	0	31	34	0	0	4
C01944	C29H50N7O17P3S	107	893.73	893.2196734	38.9727	5.639	30.4331	10.9705	10.397	3.5878	0	291.85	189.4540478	13.53703095	96.65341809	6.292099431	733.9618918	12.87043617	26.85774313	17	9	23	10	2.120196387	-8.864462469	-4.231490067	256	23	79.56153603	199.8399	5000	128	1	128	36	109	3	3	14	15	43	44	1	2	48	49	9	10	0
C01962	C3H7NO2S2	15	153.223	152.9918199	23.5161	4.6048	20.8838	9.1414	0	41.854	0	9.81	44.38799086	5.02462139	23.27953146	3.267885276	122.4527649	5.2391195	9.920150065	3	3	4	4	5.427360797	-2.568109058	-2.563424351	16	16	14.51762169	33.9917	3	2	1	2	4	14	0	0	0	0	8	7	0	0	8	7	0	0	0
C01983	C8H8O3	19	152.1473	152.0473441	63.153	5.2998	31.5472	0	0	0	0	16.99	45.58010546	4.913879778	29.00979648	3.45120128	135.3144102	6.799620023	9.739844297	3	2	4	2	NaN	-2.170201938	0.895835645	4	4	15.1611195	38.7038	3	2	1	2	3	19	1	1	6	6	5	5	0	1	5	5	6	6	1
C01984	C8H8O3	19	152.1473	152.0473441	63.153	5.2998	31.5472	0	0	0	0	17.53	46.48531481	4.894750338	29.58227693	3.397677009	135.2824243	6.419965318	9.719915234	3	2	4	2	NaN	-2.170201938	0.895835645	4	4	15.1611195	38.7038	3	2	1	2	3	19	1	1	6	6	5	5	0	1	5	5	6	6	1
C01987	C6H7NO	15	109.1259	109.0527639	66.0377	6.4655	14.6614	12.8354	0	0	0	15.18	41.03736224	4.070901379	22.37231104	3.601958475	101.4841934	4.187284715	8.047347204	2	2	2	3	7.441823998	0.838994806	0.84075454	4	4	12.07157756	32.7393	14	1	1	1	1	15	1	1	6	6	2	2	0	1	2	2	6	6	1
C02029	C10H15N5O	31	221.259	221.1276601	54.2834	6.8332	7.2311	31.6523	0	0	0	43.38	68.64776114	6.871807503	37.35162729	4.311458576	201.3790932	7.223464824	13.62953613	5	3	5	3	7.600958857	0.009196916	0.022884576	64	64	23.179317	62.3666	79	2	1	2	8	32	2	2	9	10	7	7	0	2	7	7	9	10	0
C02050	C39H66N7O17P3S	133	1029.964	1029.344874	45.479	6.4589	26.4077	9.5194	9.0218	3.1132	0	288	226.3897717	15.43212787	96.40885734	7.141090507	887.5837673	13.20076949	30.5100452	17	9	23	10	2.120196387	-5.142619132	-0.509646731	256	23	97.20270682	248.0831	5000	512	4	128	36	135	3	3	14	15	53	54	1	2	58	59	9	10	0
C02059	C31H46O2	79	450.6957	450.3497807	82.6127	10.2875	7.0999	0	0	0	0	102.92	139.0174381	10.77842876	72.34317988	5.614281581	485.0943401	10.41742323	21.38395993	2	0	4	0	NaN	9.696445808	9.696445808	4	2	55.33746788	142.9568	59	8	2	4	9	80	2	2	10	11	23	23	1	1	27	28	6	6	2
C02083	C8H8O	17	120.1485	120.0575149	79.9724	6.7113	13.3164	0	0	0	0	132.11	44.08415245	4.780613438	24.49114551	3.387707943	113.2803578	5.28441233	9.507837729	1	0	1	0	NaN	1.737264679	1.737264679	2	2	13.97615402	35.3263	1	2	1	2	1	18	2	2	9	9	0	1	1	1	3	4	6	6	1
C02090	C27H49N9O10S2	97	723.862	723.3043802	44.7998	6.823	22.1028	17.415	0	8.8594	0	74.05	182.781212	15.1314975	105.0422029	7.620424618	647.0655803	12.26192818	29.00946106	13	13	21	15	8.801194705	-13.05879568	-11.54159609	256	24	69.76017372	176.7984	2916	16	1	16	4999	96	0	0	0	0	48	47	0	0	48	47	0	0	0
C02097	C16H26N2O16P2	62	564.329	564.0757558	34.053	4.6438	45.3619	4.964	10.9772	0	0	174.7	115.3369249	8.176228409	64.25020737	5.471530656	431.2196354	8.082699017	15.97181139	13	8	17	8	NaN	-8.439172843	-3.700419526	256	18	45.309024	109.3022	352	1024	1	1024	3	64	3	3	17	17	19	21	2	1	30	32	6	6	0
C02110	C20H28O	49	284.4357	284.2140155	84.4528	9.9222	5.625	0	0	0	0	82.7	89.3888819	6.826971011	56.45528751	5.117828671	303.848619	8.321929951	12.9234873	1	0	2	0	NaN	4.855751459	4.855751459	2	4	35.792796	96.8654	28	16	16	1	6	49	1	1	6	6	15	15	1	0	21	21	0	0	1
C02124	C6H5ClO	13	128.556	128.0028925	56.0567	3.9202	12.4455	0	0	0	27.5779	14.32	41.12119688	4.571469628	21.70397695	3.390265759	104.4336697	3.966887092	9.148188271	1	1	1	1	NaN	2.269056878	2.273725171	2	2	12.79822093	32.8437	5	1	1	1	1	13	1	1	6	6	2	2	0	1	2	2	6	6	1
C02137	C8H6O3	17	150.1314	150.0316941	64.001	4.0282	31.9708	0	0	0	0	24.71	51.93775094	5.35278364	22.05582289	3.551628086	129.0528882	3.711858231	10.63722732	3	1	5	1	NaN	-1.972987922	1.49048748	4	2	14.60103847	38.2557	21	1	1	1	1	17	1	1	6	6	5	5	0	1	5	5	6	6	1
C02139	C35H34MgN4O5	79	614.973	614.2379621	68.3566	5.5726	13.0082	9.1104	0	0	0	166.49	165.0902197	9.154813666	80.59707746	6.945371819	537.9105679	9.21052904	17.45959716	6	1	9	1	4.913051934	1.72025787	4.463540991	64	32	68.73941193	168.6864	5000	8	1	8	72	85	7	7	27	33	18	18	5	2	35	41	10	10	1
C02165	C20H32O4	56	336.4657	336.2300595	71.3933	9.5861	19.0205	0	0	0	0	50.85	110.3389477	7.339601805	66.82490398	6.579892805	348.3664192	10.21074737	13.65013866	4	3	5	3	1.732351235	1.798019851	4.125548677	8	16	38.34782609	102.985	3	64	16	4	2	55	0	0	0	0	24	23	0	0	24	23	0	0	0
C02166	C30H47N3O9S	90	625.774	625.3033008	57.5801	7.5703	23.0106	6.7149	0	5.1241	0	101.83	184.5125408	10.45065294	87.74334987	8.837901074	590.67795	10.96802246	20.40562641	10	7	15	8	2.630910548	-5.695748739	-0.157749432	256	13	64.27624952	168.511	243	256	16	16	2768	89	0	0	0	0	43	42	0	0	43	42	0	0	0
C02170	C4H6O4	14	118.088	118.0266087	40.6839	5.1213	54.1948	0	0	0	0	16.32	32.8393442	3.763876955	25.72747519	3.366050342	100.7885899	6.435442133	6.969255238	4	2	6	2	NaN	-4.090469254	0.21186901	8	8	9.383458065	23.5623	6	1	1	1	2	13	0	0	0	0	8	7	0	0	8	7	0	0	0
C02191	C34H34N4O4	76	562.6582	562.2580056	72.5776	6.0907	11.3742	9.9575	0	0	0	151.41	177.1993548	9.751067851	70.62329829	7.170080162	511.1576126	7.868961495	17.78695834	6	4	8	4	4.340368151	2.833071991	6.746321068	64	256	67.07023718	163.8112	4996	1	1	1	4	80	5	5	24	28	18	18	0	5	18	18	24	28	0
C02199	C15H24N2O16P2	59	550.3024	550.0601058	32.7385	4.3959	46.5181	5.0905	11.257	0	0	149.45	104.4702422	7.617218132	73.10476428	6.233273574	414.1349749	10.59123215	14.17615855	13	8	17	8	NaN	-8.688835582	-3.949698112	256	20	43.52556358	104.9121	352	2048	1	2048	3	61	3	3	17	17	18	20	2	1	29	31	6	6	0
C02218	C3H5NO2	11	87.0773	87.03202841	41.3794	5.7876	36.7476	16.0854	0	0	0	6.38	32.3231513	3.769199893	17.88132958	3.208006633	76.59164231	3.763175649	7.193881801	3	2	4	3	5.603551485	-3.025307653	-3.017304603	4	4	7.749008696	20.9163	7	1	1	1	2	10	0	0	0	0	6	5	0	0	6	5	0	0	0
C02220	C6H7NO4	18	157.1241	157.0375077	45.8645	4.4905	40.7306	8.9144	0	0	0	25.65	53.42480334	5.690761104	22.25970934	3.855997334	130.6084914	3.785385699	11.05790521	5	3	7	4	1.31385607	-6.058893848	-3.216246996	8	8	13.63373288	38.5505	45	4	4	1	26	17	0	0	0	0	11	10	0	0	11	10	0	0	0
C02222	C6H6O5	17	158.1088	158.0215233	45.5789	3.825	50.5962	0	0	0	0	27.93	44.18461174	5.199847375	25.40569912	3.272744054	129.2104442	5.757702289	10.49681006	5	2	8	2	NaN	-6.294840164	0.180939637	16	32	12.9064759	34.5022	27	2	2	1	18	16	0	0	0	0	11	10	0	0	11	10	0	0	0
C02225	C7H10O7	24	206.1501	206.0426527	40.7833	4.8894	54.3273	0	0	0	0	16.94	51.01484429	5.279407845	35.28777903	4.131833856	171.5829051	6.451467625	9.819413286	7	4	10	4	NaN	-7.844376615	-0.779701174	64	64	16.25254459	40.1984	27	4	1	4	4	23	0	0	0	0	14	13	0	0	14	13	0	0	0
C02232	C6H7O4S	18	175.182	175.0065044	41.1368	4.0276	36.5321	0	0	18.3038	0	9.92	56.03707596	5.54454837	35.50630835	3.856500303	173.395266	6.390562491	11.03074295	4	1	7	1	NaN	-2.074404311	0.4851	32	25	27.76545689	38.9479	18	1	1	1	11	18	0	0	0	0	12	11	0	0	12	11	0	0	0
C02235	C6H5NO4	16	155.1082	155.0218577	46.4606	3.2492	41.26	9.0303	0	0	0	22.81	47.37994309	4.680034072	22.01002005	3.590304825	121.9206599	3.783352748	9.352342697	4	2	6	2	NaN	1.082483308	1.306099362	4	8	13.53951867	37.3445	57	1	1	1	1	16	1	1	6	6	5	5	0	1	5	5	6	6	1
C02247	C28H41N8O17P3S	98	886.655	886.1523222	37.929	4.6608	30.6759	12.6378	10.48	3.6164	0	250.5	180.4578392	11.60155364	93.38860776	6.928019095	694.5369637	12.58097608	23.06504145	18	10	24	12	2.426157894	-9.912601763	-6.198171683	256	24	77.45073689	197.5789	5000	128	1	128	36	101	4	4	20	21	37	39	1	3	42	44	15	16	1
C02249	C41H66N7O17P3S	135	1053.986	1053.344874	46.7216	6.3117	25.8058	9.3025	8.8162	3.0423	0	282.26	229.4940739	14.72166222	117.7232123	7.860674306	905.3177316	12.65152429	29.58496075	17	9	23	10	2.120196387	-4.977325116	-0.344352714	256	23	100.3413674	259.5183	5000	2048	16	128	36	137	3	3	14	15	55	56	1	2	60	61	9	10	0
C02273	C12H18O13	43	370.2635	370.0747407	38.9259	4.9	56.1741	0	0	0	0	44.63	75.55509875	5.471701957	53.68213156	5.304362078	293.6413921	7.754691	10.58112652	13	8	15	8	NaN	-10.78249095	-4.062825788	256	19	29.07221649	68.0715	9	1024	1	1024	4	44	2	2	12	12	13	14	2	0	25	26	0	0	0
C02274	C9H8O2	19	148.1586	148.0524295	72.9599	5.4425	21.5977	0	0	0	0	33.96	50.30692915	4.990544474	26.21070464	3.627747835	132.7986859	5.188394411	9.414627397	1	0	2	0	NaN	1.886169459	1.886169459	2	2	15.86307134	40.4553	14	1	1	1	1	20	2	2	10	11	1	1	1	1	5	6	6	6	1
C02280	C16H25N5O16P2	64	605.3411	605.0771528	31.7459	4.1627	42.2886	11.5693	10.2335	0	0	163.91	126.8886173	8.546545886	78.3748403	5.974448689	448.5561146	9.093858412	16.66108788	16	10	19	11	1.479030181	-10.02555114	-5.889283675	256	22	47.67583844	118.5113	2134	2048	1	2048	6	67	4	4	20	21	19	21	2	2	30	32	9	10	0
C02291	C7H14N2O4S	28	222.262	222.0674276	37.8269	6.3489	28.7938	12.6038	0	14.4267	0	16.64	65.96926725	7.141837707	28.08080847	3.623569525	194.4715016	6.350456195	14.22212733	6	4	8	6	5.745501913	-6.095475222	-6.091839153	64	64	20.89339318	51.5689	9	4	1	4	16	27	0	0	0	0	14	13	0	0	14	13	0	0	0
C02331	C25H40N7O17P3S	93	835.608	835.1414231	35.934	4.8249	32.5499	11.7336	11.1202	3.8373	0	244.07	160.3451434	10.16462761	91.33909381	6.28524228	656.4791985	12.8401443	20.22958462	17	9	23	10	2.120196387	-10.94672512	-6.313752714	256	23	72.08265951	181.48	5000	128	1	128	36	95	3	3	14	15	39	40	1	2	44	45	9	10	0
C02336	C6H12O6	24	180.1559	180.0633881	40.001	6.7138	53.2852	0	0	0	0	17.11	49.90233831	4.734334864	34.75066013	4.165046671	153.9233226	6.053010646	8.738509892	6	5	6	5	3.735028142	-2.758224691	-2.757999318	64	128	15.15588267	36.3608	1	16	1	16	1	24	1	1	5	5	7	7	1	0	12	12	0	0	0
C02350	C4H6N4O3	17	158.1154	158.0439901	30.3846	3.8248	30.3564	35.4341	0	0	0	26.03	45.42829255	4.776144501	26.89237243	3.668581299	119.5854436	5.491481573	9.433096048	3	4	6	5	1.293199637	-3.391788221	-2.360540882	128	64	12.4722	32.0225	36	2	1	2	24	17	1	1	5	5	6	6	1	0	11	11	0	0	0
C02370	C7H5ClO2	15	156.566	155.9978071	53.6993	3.2189	20.4379	0	0	0	22.6441	16.71	49.94088621	5.337306637	22.28962849	3.440339059	123.6457427	3.521692478	10.32722142	2	1	3	1	NaN	-0.599604613	2.2348734	2	2	14.57802291	38.119	10	1	1	1	1	15	1	1	6	6	4	4	0	1	4	4	6	6	1
C02372	C6H7NO	15	109.1259	109.0527639	66.0377	6.4655	14.6614	12.8354	0	0	0	14.77	40.75232438	4.390427745	19.75064593	3.365913777	101.4581692	3.941051376	8.758154329	2	2	2	3	7.923046517	0.828869474	0.84075454	4	4	12.06946585	32.7393	9	1	1	1	1	15	1	1	6	6	2	2	0	1	2	2	6	6	1
C02375	C6H5ClO2	14	144.556	143.9978071	49.8521	3.4863	22.1359	0	0	0	24.5254	16.42	43.25934522	4.57691358	22.95145776	3.580615606	112.9071508	4.108259407	8.856478747	2	2	2	2	NaN	1.960992712	1.970159849	4	4	13.45313578	34.8246	14	1	1	1	1	14	1	1	6	6	3	3	0	1	3	3	6	6	1
C02376	C5H7N3O	16	125.1286	125.0589119	47.9934	5.6387	12.7864	33.5815	0	0	0	17.91	43.22957505	4.359324117	22.4825211	3.796284338	108.9504396	4.178060103	8.555630596	3	2	4	3	12.60815233	-0.846440713	-0.842015653	16	8	12.08672024	32.3056	18	1	1	1	6	16	1	1	6	6	3	3	0	1	3	3	6	6	0
C02378	C6H13NO2	22	131.1729	131.0946287	54.9383	9.9893	24.3944	10.678	0	0	0	8.78	50.06157455	6.223025799	21.88780038	2.952339116	135.7368545	5.178009738	12.50182268	3	2	4	3	7.271317058	-2.76407053	-2.76407053	4	8	13.83555339	34.6598	3	1	1	1	2	21	0	0	0	0	9	8	0	0	9	8	0	0	0
C02400	C44H73NO17	135	888.0469	887.4878499	59.5093	8.2856	30.6279	1.5772	0	0	0	205.64	193.9112198	12.8909756	105.6144718	7.340147307	845.7449117	12.82197378	25.68831144	17	7	20	7	9.493049003	0.620265076	1.029654297	256	23	89.54323567	222.7047	30	ERROR	ERROR	ERROR	4	138	4	4	34	34	28	31	4	0	62	65	0	0	0
C02411	C26H40N7O19P3S	96	879.618	879.1312524	35.5016	4.5835	34.5592	11.1465	10.5638	3.6453	0	238.68	174.2449809	11.8009723	93.78074196	6.876256877	683.9001161	12.5054925	23.79011609	19	10	26	11	2.101155237	-14.09261841	-6.657679548	256	24	74.61916768	188.7956	5000	256	2	128	144	98	3	3	14	15	42	43	1	2	47	48	9	10	0
C02442	C9H13NO	24	151.2056	151.099714	71.4896	8.6658	10.5812	9.2633	0	0	0	22.61	54.05291234	6.212586186	28.88682839	3.375508202	153.8358735	5.926458736	12.42377576	2	2	2	2	10.18607894	-1.356860568	0.936828993	4	4	17.91561763	46.0419	5	1	1	1	1	24	1	1	6	6	5	5	0	1	5	5	6	6	1
C02463	C42H48N4O16	110	864.8477	864.3065315	58.3281	5.5942	29.5995	6.4782	0	0	0	179.98	200.9764307	9.842691875	119.7027353	8.004376307	744.0542504	11.24049396	18.02042322	18	11	26	11	3.164675482	-22.53199474	1.271126169	256	14	81.50205073	217.3349	5000	16	1	16	1536	114	5	5	24	28	38	38	3	2	52	56	10	10	0
C02469	C40H38N4O16	98	830.7469	830.2282812	57.8309	4.6105	30.8145	6.7441	0	0	0	126.04	217.0167231	10.30234498	100.931208	8.376348458	691.2793593	8.574384995	19.24325035	18	10	26	10	3.011326418	-19.14972687	3.512340197	256	13	81.89205609	201.3214	5000	1	1	1	1536	102	5	5	24	28	36	36	0	5	36	36	24	28	0
C02470	C10H7NO4	22	205.1669	205.0375077	58.5411	3.4389	31.1929	6.827	0	0	0	31.02	64.3028718	5.883551463	28.96360671	4.687152849	165.5581134	4.429090105	10.55776461	5	3	6	3	4.079876708	-1.542342251	0.766131921	16	16	20.50827973	50.8253	295	1	1	1	2	23	2	2	10	11	5	5	0	2	5	5	10	11	1
C02504	C7H12O5	24	176.1672	176.0684735	47.7245	6.8658	45.4097	0	0	0	0	18.03	48.56614584	5.056674668	32.83540455	3.790623897	160.8642042	6.150952451	9.877215205	5	3	7	3	NaN	-4.383184623	0.206619679	16	16	15.48484153	38.5841	9	2	1	2	2	23	0	0	0	0	12	11	0	0	12	11	0	0	0
C02505	C8H9NO	19	135.1632	135.0684139	71.0886	6.7115	11.8371	10.3628	0	0	0	20.69	47.51459568	4.859609788	27.61063478	3.496562823	129.180537	5.84145441	9.541164117	1	1	2	2	7.042475092	0.804051491	0.804051492	4	4	15.21641695	39.1878	3	1	1	1	3	19	1	1	6	6	4	4	0	1	4	4	6	6	1
C02512	C4H6N2O2	14	114.1026	114.0429274	42.1049	5.3002	28.0439	24.5511	0	0	0	4.96	34.69464781	4.481644937	23.20581539	3.033926134	101.6436618	5.825825865	8.647131224	4	2	5	3	4.571064586	-3.732582611	-3.549990844	8	16	10.09420167	25.512	6	2	1	2	15	13	0	0	0	0	8	7	0	0	8	7	0	0	0
C02513	C27H42O6	75	462.6188	462.2981391	70.0985	9.1508	20.7506	0	0	0	0	134.72	119.8808364	9.294278803	61.61059774	5.333401451	459.2138983	8.331391856	18.01985442	6	4	8	4	5.440717794	2.102546471	2.102546728	256	16	49.94502914	126.5273	6	512	1	512	44	78	4	4	17	20	16	16	4	0	33	36	0	0	4
C02532	C3H8NO6P	19	185.0725	185.0089235	19.4692	4.357	51.8696	7.5682	16.736	0	0	47.71	45.84875203	5.349682201	26.8022237	3.615330305	138.3965692	6.411053644	10.60867498	6	4	8	5	1.497803738	-7.217196484	-3.507777134	32	32	13.70325937	32.9139	12	2	1	2	4	18	0	0	0	0	11	10	0	0	11	10	0	0	0
C02571	C9H18NO4	32	204.2435	204.1235831	52.9252	8.883	31.334	6.8578	0	0	0	37.94	62.49347585	5.187366027	42.68324327	5.076306231	203.0654268	6.433848913	10.32604577	3	1	5	1	12.29637832	-3.910722885	-4.446380638	8	8	20.1353169	61.7997	9	2	1	2	2	31	0	0	0	0	14	13	0	0	14	13	0	0	0
C02576	C10H14O	25	150.2176	150.1044651	79.9553	9.3938	10.6508	0	0	0	0	32.19	50.71923705	5.633580124	29.96978866	3.612745681	157.141651	6.196769438	11.0143059	1	0	2	0	NaN	2.252888998	2.252888998	2	4	18.02367239	47.2721	3	2	1	2	3	25	1	1	6	6	5	5	1	0	11	11	0	0	1
C02593	C35H62N7O17P3S	125	977.89	977.3135738	42.9879	6.3905	27.8139	10.0264	9.5022	3.279	0	289.29	224.7180715	17.22583983	102.0507982	6.890962032	835.6588037	12.55287613	34.58610288	17	9	23	10	2.120196387	-6.197050479	-1.564078077	256	23	90.4360536	227.4459	5000	128	1	128	36	127	3	3	14	15	49	50	1	2	54	55	9	10	0
C02630	C5H8O5	18	148.114	148.0371734	40.5455	5.4441	54.0104	0	0	0	0	7.48	42.41054338	5.090038269	25.15894786	3.144471694	126.2467836	5.710122572	9.82828807	5	3	7	3	NaN	-6.929892631	-0.824980223	16	32	11.89814482	29.6302	9	2	1	2	16	17	0	0	0	0	10	9	0	0	10	9	0	0	0
C02631	C7H10O4	21	158.1519	158.0579088	53.1609	6.3732	40.4659	0	0	0	0	31.43	47.9395577	4.684073183	33.60479897	4.011135185	144.294918	6.702882663	9.17670913	4	2	6	2	NaN	-3.95676317	1.086223919	4	8	14.52672171	38.1137	13	2	2	1	11	20	0	0	0	0	11	10	0	0	11	10	0	0	0
C02632	C4H8O2	14	88.1051	88.0524295	54.529	9.1522	36.3189	0	0	0	0	5.7	30.48858708	3.705853701	24.26481555	3.242899979	89.96051684	5.588939731	7.024821271	2	1	3	1	NaN	-1.099035334	1.020176411	2	4	8.649612	21.8451	3	1	1	1	2	13	0	0	0	0	6	5	0	0	6	5	0	0	0
C02633	C27H44O7	78	480.6341	480.3087038	67.4711	9.2273	23.3017	0	0	0	0	147.81	122.7041834	9.481316936	59.36051791	5.322364923	475.0393995	7.663637004	18.60236201	7	6	8	6	5.399461954	0.609861965	0.609862205	256	17	51.13234174	128.8758	3	1024	1	1024	5	81	4	4	17	20	17	17	4	0	34	37	0	0	4
C02637	C7H8O5	20	172.1354	172.0371734	48.8423	4.6844	46.4733	0	0	0	0	23.01	51.81362979	5.041647127	28.63886078	3.883084861	141.3836104	5.092874132	10.07259697	5	3	7	3	0.02157346	-4.362916018	-1.024897903	64	64	14.70237084	38.1936	9	4	1	4	48	20	1	1	6	6	6	6	1	0	12	12	0	0	1
C02666	C10H10O3	23	178.1846	178.0629942	67.4059	5.6567	26.9373	0	0	0	0	31.8	61.43160436	5.918134597	30.89487793	4.448240342	162.1942412	5.35738117	11.71909643	3	1	4	1	2.627919897	1.514919258	1.51623342	8	16	18.87932973	50.5786	72	2	2	1	2	23	1	1	6	6	7	7	0	1	7	7	6	6	1
C02670	C6H8O6	20	176.1241	176.032088	40.9167	4.5783	54.505	0	0	0	0	25.52	42.20306746	4.387170884	33.33345962	3.659376739	140.9399692	6.613491268	8.322910127	5	3	7	3	3.878289324	-2.350301745	-2.5836149	256	128	14.11201113	33.7208	6	16	1	16	4	20	1	1	5	5	7	7	1	0	12	12	0	0	0
C02693	C10H10N2O	23	174.1992	174.079313	68.9481	5.7861	9.1845	16.0812	0	0	0	35.22	56.12500403	4.985481923	33.35935982	4.036011371	155.8570309	5.979516665	9.53013721	1	2	2	3	6.707265131	0.902813484	0.902813485	8	8	20.44006568	50.2743	78	1	1	1	3	24	2	2	9	10	4	4	0	2	4	4	9	10	1
C02700	C11H12N2O4	29	236.224	236.0797069	55.929	5.1203	27.0919	11.8588	0	0	0	40.23	72.67045263	6.381436043	37.43619831	4.771532459	205.9803773	5.861733862	12.1270027	5	3	8	4	5.312339644	-2.030599846	-2.026451668	128	128	22.89672602	60.7223	102	2	1	2	20	29	1	1	6	6	11	11	0	1	11	11	6	6	1
C02718	C3H6N2O2	13	102.0919	102.0429274	35.2938	5.9237	31.3431	27.4394	0	0	0	5.06	34.00233655	4.668713579	20.51724414	2.843459005	89.24532239	5.272990834	9.168953084	4	3	5	3	6.98627101	-3.133032027	-3.133032027	16	16	8.771698074	33.4287	9	1	1	1	7	12	0	0	0	0	7	6	0	0	7	6	0	0	0
C02727	C8H16N2O3	29	188.2242	188.1160924	51.0485	8.568	25.5005	14.883	0	0	0	16.39	62.49717517	7.228273954	28.3381561	3.497313761	183.483269	5.637236546	14.18838613	4	3	6	4	5.982573251	-3.291634194	-3.290640393	32	32	18.77561416	47.2533	9	2	1	2	12	28	0	0	0	0	13	12	0	0	13	12	0	0	0
C02734	C6H7O4P	18	174.0911	174.0081952	41.3945	4.0528	36.761	0	17.7917	0	0	56.28	49.05818811	5.087457246	24.9541019	3.361300921	135.4138246	5.189808293	10.0887227	3	2	4	2	NaN	-1.803393558	1.015815349	4	4	15.30531102	38.9118	15	1	1	1	1	18	1	1	6	6	5	5	0	1	5	5	6	6	1
C02739	C15H25N5O20P4	69	719.2755	719.0043343	25.0475	3.5033	44.4875	9.7367	17.225	0	0	262.5	141.9679013	10.60344923	71.17557204	6.351887702	504.3278779	8.328424011	21.06850188	20	11	24	11	0.940973534	-14.51322616	-6.10416252	256	22	53.94878383	144.2897	4916	1024	1	1024	1	72	4	4	19	20	25	27	2	2	35	37	9	10	0
C02759	C10H16O	27	152.2334	152.1201151	78.8966	10.5936	10.5098	0	0	0	0	197.4	45.1599361	4.331112585	36.21487103	3.921024821	157.1979138	7.352884437	8.898584276	1	0	1	0	NaN	1.978833668	1.978833668	2	2	17.65316743	43.4058	1	16	1	16	1	29	3	3	8	10	3	3	3	0	11	13	0	0	2
C02765	C10H15NO	27	165.2322	165.1153641	72.6898	9.1502	9.683	8.477	0	0	0	26.02	54.16885361	5.130907818	35.79031503	4.025842973	171.1407091	6.570848371	9.921665092	2	2	2	2	11.70274044	-1.13245679	1.317834728	4	4	19.85272993	49.6873	1	4	1	4	1	27	1	1	6	6	6	6	0	1	6	6	6	6	1
C02798	C3H5O6P	15	168.042	167.9823744	21.4423	2.9991	57.1264	0	18.4322	0	0	49.24	42.6993886	4.757341379	24.07258991	2.995703846	119.521518	5.468609093	9.051810697	6	3	9	3	NaN	-7.079114381	-1.306983749	32	16	11.63763367	28.98	15	1	1	1	4	14	0	0	0	0	10	9	0	0	10	9	0	0	0
C02814	C6H6O3	15	126.11	126.0316941	57.1439	4.7955	38.0606	0	0	0	0	18.22	40.65852348	4.264279843	22.34255473	3.622316907	107.4639916	5.012284814	7.835406627	3	3	3	3	NaN	1.060777602	1.062549851	8	8	12.17983829	32.0007	19	1	1	1	1	15	1	1	6	6	3	3	0	1	3	3	6	6	1
C02835	C5H6N2O2	15	126.1133	126.0429274	47.6187	4.7954	25.3731	22.2129	0	0	0	17.59	38.7496558	4.703058926	24.0364096	3.256186153	105.9889121	5.89302866	9.396312896	3	2	4	2	5.056490585	-2.290982319	-1.733456248	8	8	11.42819146	29.9484	24	1	1	1	4	15	1	1	5	5	4	4	0	1	4	4	5	5	0
C02880	C35H32MgN4O5	77	612.957	612.2223121	68.5814	5.262	13.051	9.1404	0	0	0	259.36	156.7495145	8.955401913	83.82436072	7.139540356	533.1707534	10.47920465	17.80219508	6	1	9	1	3.278544606	2.573126127	6.099866656	64	32	69.87837327	169.2074	5000	2	1	2	14	83	7	7	27	33	18	18	5	2	35	41	10	10	1
C02888	C6H13O9P	29	260.1358	260.0297185	27.7025	5.0371	55.3536	0	11.9068	0	0	55.71	62.95372824	6.707850178	36.30735204	4.063114797	203.3259588	7.402940824	12.30033085	8	6	10	6	NaN	-6.612270262	-3.390597923	256	256	19.88541188	48.4347	8	8	1	8	10	28	0	0	0	0	16	15	0	0	16	15	0	0	0
C02909	C11H10O	22	158.1965	158.0731649	83.5149	6.3714	10.1136	0	0	0	0	28.52	57.40153717	5.689246708	25.26417434	3.926211499	150.5817284	4.657621911	11.43359405	1	1	1	1	6.062506206	2.195372801	2.195372805	2	2	20.40227702	49.3241	1	1	1	1	1	23	2	2	10	11	2	2	0	2	2	2	10	11	2
C02933	C6H4Cl2O2	14	179.001	177.9588348	40.2591	2.2524	17.8763	0	0	0	39.6121	17.02	47.93150848	4.573124503	26.31242839	3.994797589	126.8365111	4.447345734	8.787878104	2	2	2	2	NaN	2.471486063	2.574204525	4	4	15.43302958	39.6294	14	1	1	1	1	14	1	1	6	6	4	4	0	1	4	4	6	6	1
C02934	C18H37NO2	58	299.4919	299.2824294	72.1865	12.4524	10.6844	4.6768	0	0	0	33.89	111.4858859	12.41481484	45.52272573	5.166998186	339.6970475	8.902632646	24.69512181	3	2	4	3	10.89810606	4.538527954	5.183932733	32	16	36.11221488	90.032	2	2	1	2	6	57	0	0	0	0	21	20	0	0	21	20	0	0	0
C02937	C10H10N2O	23	174.1992	174.079313	68.9481	5.7861	9.1845	16.0812	0	0	0	34.06	56.65500899	5.313724286	32.9062587	4.082334125	156.1703686	6.805927933	10.53844194	2	2	2	2	6.732879325	1.560404623	1.560619632	8	16	20.65970146	51.3484	78	2	2	1	3	24	2	2	9	10	4	4	0	2	4	4	9	10	1
C02940	C19H30O	50	274.4409	274.2296656	83.1521	11.0181	5.8298	0	0	0	0	81.48	77.57141759	6.809932329	45.44682879	4.37788728	292.7550951	8.798966164	12.45609782	1	0	2	0	NaN	4.6420687	4.6420687	4	4	32.89596674	82.0876	2	64	1	64	3	53	4	4	17	20	3	3	4	0	20	23	0	0	4
C02946	C6H11NO3	21	145.1564	145.0738932	49.6459	7.6382	33.0665	9.6494	0	0	0	9.56	49.40529154	6.156571011	22.76269087	2.995356518	137.5816002	6.787300619	12.3714234	3	2	5	2	1.938463135	-3.276822834	-0.802955013	8	16	13.60507405	34.9016	9	1	1	1	6	20	0	0	0	0	10	9	0	0	10	9	0	0	0
C02965	C6H13O9P	29	260.1358	260.0297185	27.7025	5.0371	55.3536	0	11.9068	0	0	58.95	65.37551512	5.884061029	37.07233092	4.584723203	199.2755683	7.093832759	11.5967331	8	6	9	6	NaN	-6.244320586	-3.056105249	128	256	19.793746	46.7963	4	32	1	32	1	29	1	1	6	6	10	10	1	0	16	16	0	0	0
C03012	C10H8O2	20	160.1693	160.0524295	74.9875	5.0344	19.9781	0	0	0	0	29.66	54.86162461	5.073878663	25.93402108	4.032113279	142.1753758	4.188133448	9.671055483	2	2	2	2	NaN	2.351670511	2.355591929	4	4	19.07655088	46.47	80	1	1	1	1	21	2	2	10	11	2	2	0	2	2	2	10	11	2
C03028	C12H20N4O10P3S	50	505.294	505.0112981	28.5237	3.9895	31.6635	11.088	18.3895	6.3458	0	179.77	108.3006261	8.46150849	56.58864297	5.122211387	373.1682909	7.871751889	16.86019068	10	5	13	6	2.767362066	-9.82877402	-6.99131913	256	256	40.82048322	106.0184	4172	4	1	4	3	51	2	2	11	11	19	20	0	2	19	20	11	11	0
C03035	C39H64N7O17P3S	131	1027.948	1027.329224	45.5682	6.2754	26.4595	9.5381	9.0395	3.1193	0	266.06	219.0197379	14.798371	112.5847816	8.05081962	878.967814	12.55695373	28.79414731	17	9	23	10	2.120196387	-5.504540789	-0.871568387	256	23	96.95120628	249.1997	5000	1024	8	128	36	133	3	3	14	15	53	54	1	2	58	59	9	10	0
C03056	C5H5NO2	13	111.0987	111.0320284	54.0542	4.5362	28.8021	12.6074	0	0	0	15.72	36.6957323	3.944079759	21.87383615	3.582484511	94.75672317	4.58954106	7.826850474	3	2	3	2	5.432883606	1.337322666	1.337357806	8	8	10.68048494	28.4899	9	1	1	1	2	13	1	1	6	6	2	2	0	1	2	2	6	6	0
C03057	C8H6O3	17	150.1314	150.0316941	64.001	4.0282	31.9708	0	0	0	0	27.84	52.00057097	4.726387641	24.69188689	4.227004099	129.2665571	3.510357001	9.297148074	3	1	5	1	NaN	-1.416246314	1.343331069	4	2	14.58273932	39.8982	46	1	1	1	2	17	1	1	6	6	5	5	0	1	5	5	6	6	1
C03058	C26H42N7O20P3S	99	897.633	897.141817	34.7891	4.7161	35.648	10.9228	10.3518	3.5722	0	252.08	187.0121907	13.73665858	104.1457965	7.573304462	701.4183193	10.10143999	27.4916733	20	11	27	12	2.099392269	-15.22787432	-7.760238362	256	26	75.59428568	189.1945	5000	256	1	256	72	101	3	3	14	15	43	44	1	2	48	49	9	10	0
C03063	C7H8O5	20	172.1354	172.0371734	48.8423	4.6844	46.4733	0	0	0	0	18.05	53.88830599	5.539060194	29.41768166	4.085856651	146.2390921	5.271281077	10.93610654	5	2	8	2	NaN	-5.486894373	0.77769752	8	16	14.70237084	39.1783	24	2	2	1	54	19	0	0	0	0	12	11	0	0	12	11	0	0	0
C03069	C26H42N7O17P3S	96	849.635	849.1570732	36.7544	4.9825	32.0125	11.5399	10.9366	3.774	0	240.61	163.1328229	11.28418511	96.80959205	7.023059714	673.5025036	10.66203786	22.07921574	17	9	23	10	2.120196383	-10.16821903	-5.535246633	256	23	73.88589488	186.8112	5000	128	1	128	36	98	3	3	14	15	40	41	1	2	45	46	9	10	0
C03078	C5H12N4O	22	144.175	144.101111	41.6532	8.3893	11.0972	38.8603	0	0	0	13.77	52.17703239	5.821445842	22.74234732	3.19059614	136.6135748	5.466812136	11.68989609	4	4	5	6	NaN	-4.177627278	-1.76251498	32	32	14.20629415	47.9946	12	1	1	1	6	21	0	0	0	0	10	9	0	0	10	9	0	0	0
C03082	C4H8NO7P	21	213.0826	213.0038381	22.5466	3.7842	52.5598	6.5734	14.536	0	0	46.95	51.64708157	5.626422849	26.33689957	3.269658741	157.5179527	6.435163529	11.0292188	7	4	10	5	1.485568987	-7.325463573	-3.900511227	128	64	15.7006124	37.6924	27	2	1	2	4	20	0	0	0	0	13	12	0	0	13	12	0	0	0
C03087	C7H13NO3	24	159.183	159.0895433	52.8165	8.2315	30.1528	8.7991	0	0	0	11.97	56.77222328	6.727808461	24.19436509	3.086139541	154.5473608	5.3070404	13.10522753	3	2	5	2	1.985199144	-2.736786743	-0.358386348	8	16	15.42344651	39.5026	9	1	1	1	6	23	0	0	0	0	11	10	0	0	11	10	0	0	0
C03090	C5H12NO7P	26	229.125	229.0351383	26.2099	5.2789	48.8798	6.1131	13.5183	0	0	59.65	54.85867506	5.571617679	33.09663496	3.987808421	176.5013744	5.962195745	11.06137054	7	5	8	6	3.568167446	-4.491362463	-4.413290697	64	64	18.04821203	42.4913	4	16	1	16	1	26	1	1	5	5	9	9	1	0	14	14	0	0	0
C03150	C11H15N2O5	33	255.2472	255.0980966	51.7607	5.9233	31.341	10.975	0	0	0	43.23	74.65117847	5.666744054	42.57627809	4.963115186	219.3288403	6.248037566	10.46259777	5	4	6	5	11.67916971	-6.120791692	-6.120781884	256	13	23.69513178	60.8345	15	16	1	16	2	34	2	2	11	11	7	8	1	1	12	13	6	6	0
C03170	C27H47N9O10S2	95	721.846	721.2887301	44.9249	6.5628	22.1646	17.4636	0	8.8842	0	108.24	170.7432384	9.907326689	117.5954714	8.343762946	637.8276123	13.83771553	19.77222408	13	11	21	13	9.154868788	-13.37054076	-11.7717633	256	22	69.1047336	175.223	2916	16	1	16	4946	95	1	1	24	24	24	24	1	0	48	48	0	0	0
C03175	C7H11O8P	27	254.1312	254.0191538	33.0833	4.3628	50.3658	0	12.1881	0	0	71.66	59.70327919	5.384982755	38.22326506	4.710267123	192.9504059	5.987661191	10.58233906	7	5	9	5	NaN	-7.597142437	-1.763640108	32	32	19.83767867	49.8332	16	8	1	8	3	27	1	1	6	6	10	10	1	0	16	16	0	0	1
C03189	C3H9O6P	19	172.0737	172.0136745	20.9399	5.2718	55.788	0	18.0003	0	0	47.32	46.77255136	5.479429089	25.6357312	3.45614235	133.0525714	6.477525621	10.95305051	5	4	6	4	NaN	-4.927419377	-1.962580054	16	16	12.86560871	31.389	4	2	1	2	1	18	0	0	0	0	10	9	0	0	10	9	0	0	0
C03203	C11H8O3	22	188.1794	188.0473441	70.2084	4.285	25.5066	0	0	0	0	33.78	63.38509339	5.906858938	25.71126814	3.931013148	161.5143274	3.818034473	11.46039693	3	2	4	2	NaN	-0.49447665	2.966740159	4	4	20.7635471	51.7453	88	1	1	1	1	23	2	2	10	11	4	4	0	2	4	4	10	11	2
C03219	C4H9NO	15	87.1204	87.06841392	55.1453	10.4126	18.3647	16.0774	0	0	0	8.55	35.47172369	4.372130324	22.43347148	3.083754604	92.89095114	5.217428348	8.64279407	2	1	2	1	7.300966462	0.87090103	0.871039945	4	8	9.519445333	24.7414	3	2	2	1	3	14	0	0	0	0	6	5	0	0	6	5	0	0	0
C03221	C33H56N7O17P3S	117	947.821	947.2666236	41.8173	5.9552	28.6963	10.3445	9.8037	3.383	0	266.89	215.6342024	15.91950814	95.08834816	6.980546025	792.7456556	12.82786066	32.2032525	17	9	23	10	2.120196383	-6.855030986	-2.222058584	256	23	86.55325794	219.3372	5000	256	2	128	36	119	3	3	14	15	47	48	1	2	52	53	9	10	0
C03227	C10H12N2O4	28	224.2133	224.0797069	53.5682	5.3945	28.5432	12.4941	0	0	0	32.89	68.80691552	6.385833015	31.43477729	4.068523847	194.7063949	5.75655241	12.4856038	6	4	8	6	6.10329421	-2.352892769	-2.349268152	128	64	21.6114491	57.0311	108	2	1	2	10	28	1	1	6	6	10	10	0	1	10	10	6	6	1
C03232	C3H5O7P	16	184.0414	183.977289	19.5783	2.7384	60.8536	0	16.8298	0	0	48.47	43.99896373	5.111632311	25.49497303	3.428212867	128.6083292	5.719050506	10.11696546	6	3	9	3	NaN	-7.551517827	-0.874940124	16	16	12.454624	30.5648	20	1	1	1	2	15	0	0	0	0	11	10	0	0	11	10	0	0	0
C03240	C21H38O6	65	386.5228	386.2668389	65.2548	9.9093	24.8359	0	0	0	0	91.05	105.8016927	6.696338626	65.95230059	5.691693516	398.4187596	7.888069661	13.24928301	5	3	7	3	5.55755932	2.869199048	2.869199092	128	64	41.40656068	102.9425	6	1024	1	1024	3	65	1	1	14	14	13	13	1	0	27	27	0	0	0
C03242	C20H34O2	56	306.4828	306.2558803	78.3776	11.1817	10.4407	0	0	0	0	47.23	109.2415349	11.82367606	40.98196382	4.379951613	338.6807972	8.727169817	24.00959418	2	1	3	1	NaN	4.847968633	6.949092468	2	4	37.38399059	98.8374	3	8	8	1	2	55	0	0	0	0	22	21	0	0	22	21	0	0	0
C03263	C36H44N4O8	92	660.7566	660.3159144	65.4379	6.7119	19.371	8.4792	0	0	0	176.38	144.4717762	8.962387932	104.440269	7.219052966	600.2629576	13.64199742	18.34963489	8	8	12	8	NaN	-5.296090078	4.891239219	256	9	67.53324033	181.8608	5000	1	1	1	16	96	5	5	24	28	24	24	1	4	28	32	20	20	0
C03267	C6H13O9P	29	260.1358	260.0297185	27.7025	5.0371	55.3536	0	11.9068	0	0	63.5	54.85991804	5.096968772	44.41571611	4.316492193	198.8893695	8.457240164	9.768657997	8	6	9	6	NaN	-6.36707212	-2.881565349	128	256	19.793746	47.2337	4	16	1	16	1	29	1	1	5	5	11	11	1	0	16	16	0	0	0
C03287	C5H10NO7P	24	227.1092	227.0194882	26.4426	4.4381	49.3136	6.1674	13.6383	0	0	49.16	56.8361549	6.421543353	28.37677487	3.302037259	174.4874787	6.871509135	12.35274388	7	4	10	5	1.541546558	-7.051155728	-3.877018987	64	64	17.46899664	42.4474	27	2	1	2	4	23	0	0	0	0	14	13	0	0	14	13	0	0	0
C03291	C5H11O8P	25	230.1098	230.0191538	26.0978	4.8183	55.6235	0	13.4604	0	0	53.25	53.33119972	5.490249847	33.69093016	3.742919395	177.6913262	6.734264056	10.49557661	7	5	9	5	NaN	-5.746702785	-2.760262981	256	128	17.37363	42.4722	8	4	1	4	8	24	0	0	0	0	14	13	0	0	14	13	0	0	0
C03313	C31H48O2	81	452.7116	452.3654308	82.2448	10.687	7.0683	0	0	0	0	115.96	144.2305008	8.390729317	82.09511032	7.587463825	492.9647859	11.39623432	17.00051848	2	2	2	2	NaN	10.7916837	10.79346159	4	4	57.55005423	144.6118	77	8	2	4	1	82	2	2	10	11	23	23	0	2	23	23	10	11	2
C03319	C16H26N2O15P2	61	548.3296	548.0808412	35.0467	4.7793	43.7677	5.1089	11.2975	0	0	155.9	107.8142062	8.052483417	70.57188835	5.870397384	422.2847628	10.40973082	14.12696622	12	7	16	7	NaN	-7.392262619	-2.65350956	256	16	44.5805002	107.7585	352	1024	1	1024	3	63	3	3	17	17	18	20	2	1	29	31	6	6	0
C03341	C5H9NO3	18	131.1299	131.0582432	45.797	6.9179	36.6036	10.6815	0	0	0	7.61	41.34328941	4.898990198	26.88340669	3.315497238	121.0337731	6.36649867	9.283090244	4	2	6	3	5.538028279	-3.293208107	-3.28944564	64	32	12.1488892	30.0838	6	2	1	2	14	17	0	0	0	0	9	8	0	0	9	8	0	0	0
C03344	C26H42N7O18P3S	97	865.634	865.1519878	36.0751	4.8905	33.2692	11.3266	10.7345	3.7042	0	254.31	167.4540959	10.79357303	91.80528426	6.154786891	684.1815373	12.55467268	21.46284023	18	9	25	10	2.120196387	-11.02300573	-6.390028992	256	24	74.32435747	186.6777	5000	256	1	256	108	99	3	3	14	15	41	42	1	2	46	47	9	10	0
C03351	C7H8O2	17	124.1372	124.0524295	67.7274	6.4957	25.777	0	0	0	0	17.65	43.44010612	4.623528259	25.0413761	3.634855716	115.899422	4.769215995	9.274080867	2	2	2	2	3.280562624	0.900520018	0.902330727	4	4	13.38565468	34.8548	7	1	1	1	1	17	1	1	6	6	3	3	0	1	3	3	6	6	1
C03360	C6H6NO6P	20	219.0887	218.9932734	32.8927	2.7604	43.8162	6.3932	14.1375	0	0	63.09	56.26961432	5.735035039	28.27604527	3.426061516	158.3622887	5.310517939	11.53527234	5	2	8	2	NaN	-1.867431844	0.955799538	4	4	17.40785222	46.2365	59	1	1	1	1	20	1	1	6	6	8	8	0	1	8	8	6	6	1
C03373	C8H14N3O7P	33	295.1864	295.0569363	32.5508	4.7804	37.9407	14.2351	10.493	0	0	79	74.43517987	6.330007706	40.63286167	5.011090106	226.4433712	6.761371494	11.80836427	8	5	9	6	3.573210653	-5.711572031	-4.861083303	128	128	24.07289454	60.4357	40	16	1	16	1	34	2	2	10	10	9	10	1	1	14	15	5	5	0
C03406	C10H18N4O6	38	290.2731	290.1226343	41.3772	6.2503	33.0711	19.3014	0	0	0	26.46	77.10275924	7.447850901	44.26301708	4.696808569	253.1759595	8.601834887	14.01357409	10	7	13	8	4.635520621	-7.875423763	-6.067710474	256	11	25.54903296	75.3116	108	4	1	4	124	37	0	0	0	0	20	19	0	0	20	19	0	0	0
C03428	C30H52O7P2	91	586.6772	586.318827	61.4172	8.9339	19.0899	0	10.559	0	0	315.22	161.6099837	11.30733905	90.08130564	8.350041922	569.4328817	12.77889452	22.11718626	5	3	7	3	NaN	3.119542319	8.000155052	8	8	63.3195283	165.3324	17	128	8	16	1	91	1	1	3	3	36	36	1	0	39	39	0	0	1
C03451	C13H21N3O8S	46	379.386	379.1049354	41.1557	5.5792	33.7375	11.0758	0	8.4518	0	33.29	102.5382496	8.520243176	59.30229359	6.165451866	322.7674041	7.209323068	16.85436421	9	6	14	7	2.535778464	-8.626153321	-5.516165433	256	14	33.81378067	84.7788	243	8	1	8	623	45	0	0	0	0	25	24	0	0	25	24	0	0	0
C03453	C6H6O5	17	158.1088	158.0215233	45.5789	3.825	50.5962	0	0	0	0	27.04	45.0911723	4.842815546	26.69688406	3.333704446	129.1572668	5.417555234	9.660762581	5	2	8	2	NaN	-5.955134998	0.333128855	16	8	12.9064759	34.5773	20	2	2	1	26	16	0	0	0	0	11	10	0	0	11	10	0	0	0
C03460	C25H40N7O17P3S	93	835.608	835.1414231	35.934	4.8249	32.5499	11.7336	11.1202	3.8373	0	240.19	167.3132818	10.67943763	93.0903363	6.178744816	656.3873119	12.58741128	21.23672765	17	9	23	10	2.120196383	-10.40266481	-5.76969241	256	22	72.08201785	181.2128	5000	128	1	128	36	95	3	3	14	15	39	40	1	2	44	45	9	10	0
C03479	C20H23N7O7	57	473.4393	473.1658961	50.7381	4.8966	23.6558	20.7095	0	0	0	78.95	119.9004824	10.93167366	62.84895899	5.409195323	394.799619	8.775728367	21.78581753	11	7	16	8	3.541530302	-8.254743757	-3.549338052	256	17	43.31188721	126.662	3708	4	1	4	276	59	3	3	16	17	18	19	1	2	22	24	12	12	1
C03492	C9H18NO8P	37	299.2149	299.0770031	36.1266	6.0635	42.777	4.6812	10.3517	0	0	66.51	73.37315109	6.617151079	48.36600938	4.86078603	251.2104787	6.492386456	12.94359669	7	5	10	5	NaN	-6.741857865	-1.478941138	128	128	24.9991842	62.384	36	2	1	2	8	36	0	0	0	0	19	18	0	0	19	18	0	0	0
C03506	C11H14NO6P	33	287.2057	287.0558737	46.0011	4.9133	33.4243	4.8769	10.7845	0	0	78.55	71.25667659	5.431834526	45.92741553	4.774987179	230.3836079	7.654959374	10.43598032	5	5	6	5	NaN	-3.060101827	-0.079577874	32	32	27.25029166	66.7583	104	4	1	4	1	34	2	2	9	10	10	10	0	2	10	10	9	10	1
C03546	C6H13O9P	29	260.1358	260.0297185	27.7025	5.0371	55.3536	0	11.9068	0	0	61.52	64.07929542	5.603943172	34.05322686	4.167460771	198.7522193	6.538710096	10.76140934	8	7	9	7	NaN	-7.139288028	-3.905575683	128	128	19.73275306	46.6479	4	32	1	32	1	29	1	1	6	6	10	10	1	0	16	16	0	0	1
C03557	C2H8NO3P	15	125.0636	125.0241796	19.2073	6.4475	38.379	11.1997	24.7664	0	0	45.58	34.53839784	4.27729712	23.30330706	3.104941064	101.4931531	5.98820201	8.392504155	4	3	5	4	4.736603822	-2.961373178	-3.067384779	8	16	10.32294552	25.2516	3	1	1	1	4	14	0	0	0	0	7	6	0	0	7	6	0	0	0
C03561	C25H42N7O18P3S	96	853.623	853.1519878	35.1757	4.9593	33.7373	11.486	10.8855	3.7563	0	230.54	180.5853655	12.08879754	106.0443136	7.420878231	672.5056047	10.01627534	23.79857317	18	10	24	11	2.12021183	-11.95150193	-7.318529524	256	25	73.04937961	183.0284	5000	256	1	256	36	98	3	3	14	15	40	41	1	2	45	46	9	10	0
C03569	C12H10O3	25	202.206	202.0629942	71.278	4.9847	23.7373	0	0	0	0	41.47	60.34789129	5.761145292	33.00689564	3.949883608	178.0050381	6.066205949	11.40461386	3	3	3	3	NaN	2.704186019	2.709775213	8	8	23.10325204	57.1369	260	1	1	1	1	26	2	2	12	12	3	4	0	2	3	4	12	12	2
C03582	C14H12O3	29	228.2433	228.0786443	73.6713	5.2993	21.0294	0	0	0	0	48.27	78.29983998	7.251047351	26.78678012	3.997555807	204.5732179	4.333307633	14.49282852	3	3	3	3	NaN	3.398021009	3.402390886	8	8	25.32112033	67.4555	83	2	2	1	1	30	2	2	12	12	5	6	0	2	5	6	12	12	2
C03589	C5H8O4	17	132.1146	132.0422587	45.4556	6.1034	48.441	0	0	0	0	8.06	40.38622155	4.778428183	25.92359757	3.218642773	117.6623228	6.199182042	9.247394974	4	2	6	2	0.257371162	-3.471019589	-0.097786332	16	8	11.33158423	28.8101	5	2	1	2	14	16	0	0	0	0	9	8	0	0	9	8	0	0	0
C03595	C41H68N7O17P3S	137	1056.002	1055.360524	46.6324	6.4905	25.7566	9.2847	8.7993	3.0365	0	305.5	229.4506318	15.99492946	111.4282039	7.299829298	914.3898465	11.66717102	31.68479751	17	9	23	10	2.120196387	-4.615403459	0.017568943	256	23	100.5923894	258.4017	5000	1024	8	128	36	139	3	3	14	15	55	56	1	2	60	61	9	10	0
C03598	C15H25N3O14P2	59	533.3182	533.0811755	33.7811	4.7249	41.9996	7.879	11.6155	0	0	159.4	107.4067696	7.236148135	69.59505993	5.56436941	409.0941809	9.805751243	14.04824397	13	7	16	8	1.214997392	-8.379946446	-3.938763522	256	18	43.36073117	105.7942	396	1024	1	1024	3	61	3	3	17	17	17	19	2	1	28	30	6	6	0
C03657	C11H8O4	23	204.1788	204.0422587	64.7069	3.9492	31.3439	0	0	0	0	36.52	65.57023212	5.909541009	28.61674163	4.248740392	170.0586422	4.101832693	11.46306433	4	3	5	3	NaN	-0.828551932	2.663174837	8	8	21.37071545	53.7262	280	1	1	1	1	24	2	2	10	11	5	5	0	2	5	5	10	11	2
C03672	C9H10O4	23	182.1733	182.0579088	59.3371	5.5329	35.1301	0	0	0	0	21.44	56.16602638	6.123320639	29.20527362	3.467242926	160.7411301	5.728220319	12.31906192	4	3	5	3	NaN	-2.288614545	0.880931528	16	16	17.64624948	45.4397	15	2	1	2	4	23	1	1	6	6	7	7	0	1	7	7	6	6	1
C03680	C6H8N2O3	19	156.1393	156.0534921	46.1538	5.1643	30.7406	17.9413	0	0	0	15.24	48.51862039	5.11897696	26.0891957	3.456496168	130.9564146	5.279715729	10.22500979	5	2	7	2	5.204769756	-4.839863616	-1.278101914	32	32	13.67290556	35.0203	24	2	1	2	10	19	1	1	5	5	6	6	1	0	11	11	0	0	0
C03722	C7H5NO4	17	167.1189	167.0218577	50.3084	3.0156	38.2947	8.3813	0	0	0	27.73	53.99125261	4.749732115	24.71414763	4.229463162	133.388706	3.488944243	9.454145114	5	2	7	2	2.085004381	-4.930132757	-0.593251928	8	8	14.2780315	38.0415	76	1	1	1	1	17	1	1	6	6	6	6	0	1	6	6	6	6	0
C03735	C6H13O9P	29	260.1358	260.0297185	27.7025	5.0371	55.3536	0	11.9068	0	0	59.22	63.84323358	5.886371537	36.62600001	4.13111512	199.2599575	7.576183792	11.59617388	8	6	9	6	NaN	-6.244320586	-3.056105249	128	256	19.793746	46.7963	4	32	1	32	1	29	1	1	6	6	10	10	1	0	16	16	0	0	0
C03752	C6H13NO6	26	195.1705	195.0742872	36.9237	6.7137	49.1859	7.1766	0	0	0	13.43	52.23424559	5.247671686	33.52383917	3.667780254	170.5156454	6.559658857	10.01574746	7	6	8	7	5.054224557	-5.93216599	-5.913446499	128	128	16.60961388	39.9285	3	16	1	16	11	25	0	0	0	0	13	12	0	0	13	12	0	0	0
C03758	C8H11NO2	22	153.1784	153.0789786	62.7279	7.2382	20.8899	9.144	0	0	0	21.7	51.01962673	5.397981848	27.3694346	3.581190082	144.6863126	5.534707057	10.93341369	3	3	3	4	9.755612292	-1.812501499	-0.060854985	8	8	16.6672732	43.2482	14	1	1	1	1	22	1	1	6	6	5	5	0	1	5	5	6	6	1
C03765	C8H8O2	18	136.1479	136.0524295	70.5744	5.9226	23.503	0	0	0	0	18.99	45.88596088	4.868389583	25.31595537	3.370061801	126.6885584	5.804326327	9.775242844	2	1	3	1	NaN	1.147445442	1.148812531	8	8	14.68283511	38.4211	10	1	1	1	2	18	1	1	6	6	4	4	0	1	4	4	6	6	1
C03785	C6H14O12P2	34	340.1157	339.9960489	21.1881	4.1489	56.4493	0	18.2137	0	0	106.63	69.84811429	5.918096148	48.75225661	5.29183643	243.7854276	7.121112957	10.66874903	10	7	12	7	NaN	-9.431832069	-3.005131381	256	12	24.46880327	58.1066	16	16	1	16	1	34	1	1	5	5	15	15	1	0	20	20	0	0	0
C03794	C14H18N5O11P	49	463.2934	463.074043	36.2945	3.9161	37.9875	15.1164	6.6856	0	0	107.82	101.4598293	7.655918256	61.92262603	5.63526618	350.9877667	7.909508511	14.84553909	14	7	17	7	2.819770417	-11.06278834	-5.642918674	256	15	37.78215446	96.1758	2844	32	1	32	24	51	3	3	14	15	17	18	1	2	22	23	9	10	0
C03824	C6H7NO3	17	141.1247	141.0425931	51.0642	4.9995	34.0112	9.9251	0	0	0	32.85	48.02651269	5.285688688	21.11357763	3.491423435	121.9554119	4.50071693	10.60882066	4	2	6	3	5.238588409	-3.271108599	-3.203700058	8	8	13.10068238	37.6251	30	4	4	1	26	16	0	0	0	0	10	9	0	0	10	9	0	0	0
C03838	C7H15N2O8P	33	286.1764	286.056602	29.3787	5.2831	44.726	9.7889	10.8233	0	0	65.79	70.74185506	5.562292404	44.86992068	5.256286009	224.144197	6.987764685	11.09793742	8	6	10	7	3.575881679	-7.607475752	-7.142799538	256	11	23.00101763	55.2948	12	16	1	16	4	33	1	1	5	5	13	13	1	0	18	18	0	0	0
C03862	C31H55O9P	96	602.7368	602.3583699	61.7735	9.1975	23.8901	0	5.1389	0	0	181.02	167.2952784	12.1719747	81.40191777	5.797602152	595.5235384	13.29567218	24.32552902	7	5	8	5	NaN	3.195654705	5.571630684	64	256	64.44057151	164.9112	5	1024	8	128	1	96	1	1	6	6	35	35	1	0	41	41	0	0	0
C03912	C5H7NO2	15	113.1146	113.0476785	53.0908	6.2376	28.2888	12.3828	0	0	0	11.83	34.57147352	4.411936431	24.1750114	3.187611253	100.2928254	5.660606429	8.634843838	3	1	4	1	3.953218436	-3.166164551	-2.309719873	16	16	10.5236064	27.3973	6	2	1	2	11	15	1	1	5	5	3	3	1	0	8	8	0	0	0
C03917	C19H30O2	51	290.4403	290.2245802	78.5715	10.4112	11.0173	0	0	0	0	74.56	85.71989804	7.274575761	41.6966915	4.351238698	301.31379	6.525181767	14.44644439	2	1	3	1	9.175900386	3.411257631	3.411257633	8	8	33.4999809	83.6031	2	128	1	128	3	54	4	4	17	20	4	4	4	0	21	24	0	0	4
C03918	C6H4Cl2O4	16	211	209.948664	34.1536	1.9108	30.3306	0	0	0	33.6047	33.42	46.74664711	4.812335995	32.49330875	3.770906996	147.0550765	6.603584019	9.652981378	4	2	6	2	NaN	-5.358008327	1.112016758	4	16	16.38573685	44.4331	27	4	4	1	4	15	0	0	0	0	12	11	0	0	12	11	0	0	0
C03925	C7H4Br2O3	16	295.913	293.8527193	28.412	1.3625	16.2204	0	0	0	54.0051	18.38	59.14589824	5.15461146	30.70517527	4.754209557	154.6630782	4.284011487	9.225473495	3	2	4	2	NaN	-0.217832295	2.864768653	4	4	19.48829971	50.5407	16	1	1	1	1	16	1	1	6	6	6	6	0	1	6	6	6	6	1
C03979	C6H10O5	21	162.1406	162.0528234	44.4455	6.2165	49.338	0	0	0	0	11.52	46.04835765	5.214285594	28.2291038	3.253795198	143.3551488	6.563606068	10.47477523	5	3	7	3	0.132801607	-4.113807977	-0.728121274	32	16	13.84653563	34.7726	5	4	1	4	26	20	0	0	0	0	11	10	0	0	11	10	0	0	0
C03981	C4H4O5	13	132.0716	132.0058732	36.3763	3.0527	60.5709	0	0	0	0	11.38	40.96399622	4.721878508	18.52507233	3.07160729	101.571524	3.872004623	9.288205177	5	3	7	3	NaN	-6.971144121	-0.559572013	8	16	9.864852941	26.5744	22	2	2	1	4	12	0	0	0	0	9	8	0	0	9	8	0	0	0
C04002	C7H8O6	21	188.1348	188.032088	44.6886	4.286	51.0253	0	0	0	0	34.05	54.52617913	5.896383478	29.92585719	3.810471569	154.727294	6.001870949	11.47607721	6	3	9	3	NaN	-7.895762486	-0.076468277	8	32	15.2636018	39.8315	39	2	2	1	28	20	0	0	0	0	13	12	0	0	13	12	0	0	0
C04006	C6H13O9P	29	260.1358	260.0297185	27.7025	5.0371	55.3536	0	11.9068	0	0	59.91	63.32180509	5.563888587	36.65977859	4.378945623	198.7389215	7.075110714	11.13154016	8	7	9	7	NaN	-7.139288028	-3.905575683	128	128	19.73275306	46.6479	4	32	1	32	1	29	1	1	6	6	10	10	1	0	16	16	0	0	1
C04036	C19H39O7P	66	410.4825	410.2433401	55.5939	9.5765	27.2839	0	7.5457	0	0	92.96	134.5878156	14.96718598	48.05770262	4.735422729	407.8763333	8.092958955	29.8473707	5	3	7	3	NaN	1.991845035	4.958473848	16	16	42.05297829	104.9804	12	2	1	2	1	65	0	0	0	0	27	26	0	0	27	26	0	0	0
C04037	C6H11O10P	28	274.1193	274.0089831	26.2894	4.0447	58.3666	0	11.2994	0	0	58.92	62.44491279	5.077076281	40.80827681	4.547626292	201.4373425	7.233169639	9.824421182	9	6	11	6	NaN	-9.180632268	-2.735830711	256	13	19.87735482	46.6637	12	32	1	32	2	28	1	1	6	6	11	11	1	0	17	17	0	0	0
C04039	C5H10O4	19	134.1305	134.0579088	44.7724	7.5146	47.7129	0	0	0	0	10.56	39.60990474	4.355784643	28.06218633	3.505486225	124.3864817	5.86803228	8.476643412	4	3	5	3	0.306540117	-3.85664003	-0.821587792	16	16	11.85845	29.4405	3	2	1	2	3	18	0	0	0	0	9	8	0	0	9	8	0	0	0
C04043	C8H8O3	19	152.1473	152.0473441	63.153	5.2998	31.5472	0	0	0	0	21.18	48.12112942	4.8622774	27.93062485	3.636936249	135.1306613	5.814330531	9.762041744	3	2	4	2	NaN	0.842953243	0.84524721	16	16	15.31107594	40.402	28	1	1	1	2	19	1	1	6	6	5	5	0	1	5	5	6	6	1
C04044	C9H10O4	23	182.1733	182.0579088	59.3371	5.5329	35.1301	0	0	0	0	23.62	57.10219209	5.768076149	29.12557337	3.816345762	160.5420018	5.219979537	11.46310562	4	3	5	3	NaN	-1.559985573	1.448432127	8	16	17.63326973	45.9284	42	1	1	1	2	23	1	1	6	6	7	7	0	1	7	7	6	6	1
C04051	C4H6N4O	15	126.1166	126.0541608	38.094	4.7953	12.6862	44.4246	0	0	0	20.81	43.25597942	4.410594903	22.48832031	3.68208622	102.5890237	3.76682043	8.424500285	3	3	4	5	7.880975313	-1.005836889	-0.998368532	32	32	11.23761095	31.6729	34	1	1	1	4	15	1	1	5	5	4	4	0	1	4	4	5	5	0
C04076	C6H11NO3	21	145.1564	145.0738932	49.6459	7.6382	33.0665	9.6494	0	0	0	9.46	46.08849926	5.69447565	26.06437228	3.290019488	138.1693356	6.323129681	11.13119727	4	2	6	3	5.792046197	-3.046436898	-3.044787062	32	32	13.96661585	34.9633	6	2	1	2	8	20	0	0	0	0	10	9	0	0	10	9	0	0	0
C04079	C12H22N2O6S	43	322.378	322.1198571	44.7079	6.8785	29.7776	8.6896	0	9.9464	0	35.16	82.63559827	7.732452648	46.89958581	4.570333829	289.7745342	7.802067711	15.19276831	6	6	9	6	0.780093534	-5.065419303	-1.843342135	256	13	30.26600901	76.5348	27	4	1	4	81	42	0	0	0	0	21	20	0	0	21	20	0	0	0
C04089	C15H22N2O16P2	57	548.2865	548.0444557	32.8588	4.0444	46.6892	5.1093	11.2984	0	0	154.23	113.3023697	8.20803153	63.17820243	5.206259404	407.6552436	10.37214668	16.19098382	13	7	18	7	NaN	-8.073749297	-3.334521938	256	19	43.00628963	104.1454	704	1024	1	1024	21	59	3	3	17	17	18	20	2	1	29	31	6	6	0
C04115	C7H8O8	23	220.1336	220.0219172	38.1927	3.663	58.1443	0	0	0	0	25.21	53.79912997	5.963960766	31.6782464	3.542854679	173.5336473	6.894660161	11.74856178	8	4	12	4	NaN	-9.9140504	-1.033467784	128	64	16.47680351	40.9699	45	2	1	2	4	22	0	0	0	0	15	14	0	0	15	14	0	0	0
C04121	C17H26N3O15P	62	543.3732	543.1101537	37.5767	4.8229	44.1669	7.7332	5.7003	0	0	117.81	125.9122915	7.98687748	71.02118734	6.499309459	426.5629782	9.957713605	15.97792864	15	9	18	10	1.008875524	-10.47714618	-4.952550272	256	21	44.39329808	108.3563	270	1024	1	1024	3	64	3	3	17	17	19	21	2	1	30	32	6	6	0
C04133	C7H12NO8P	29	269.1458	269.0300529	31.2377	4.494	47.5561	5.2041	11.5082	0	0	67.96	64.55513904	6.037789415	41.11526539	4.789328493	210.1879059	7.800193421	11.95056412	7	4	11	4	0.027828866	-8.041285962	-1.766880562	128	128	20.90887726	51.8912	81	2	1	2	17	28	0	0	0	0	17	16	0	0	17	16	0	0	0
C04144	C29H37N9O12	87	703.6572	703.2561677	49.5	5.3	27.285	17.915	0	0	0	92.86	167.2860261	10.86842058	108.0863173	8.315969177	593.5064114	13.35516125	21.07712028	17	12	25	13	3.018009571	-16.16082239	-5.734675851	256	23	63.51962801	177.7622	4099	16	1	16	4999	89	3	3	16	17	34	35	1	2	38	40	12	12	1
C04146	C40H68O7P2	117	722.9112	722.4440276	66.4574	9.4811	15.4923	0	8.5692	0	0	219.02	214.9606665	20.3363077	95.27492011	6.913874251	728.0511961	10.34565232	40.36459119	5	3	7	3	NaN	7.034042106	11.91530444	8	8	81.71897994	215.7435	17	256	128	2	1	116	0	0	0	0	49	48	0	0	49	48	0	0	0
C04181	C5H8O4	17	132.1146	132.0422587	45.4556	6.1034	48.441	0	0	0	0	10.94	38.59396341	4.23059942	27.23414867	3.310846472	117.951063	6.594672341	8.481785674	4	2	6	2	NaN	-3.15143782	0.250156036	4	4	11.33158423	28.8991	5	1	1	1	1	16	0	0	0	0	9	8	0	0	9	8	0	0	0
C04188	C6H13O7PS	28	260.202	260.01196	27.6955	5.0358	43.0419	0	11.9037	12.3231	0	63.61	65.38579384	6.044025403	38.32493228	4.61959343	200.3913317	6.182415206	12.03065832	6	4	7	4	NaN	-4.155989687	-0.943299161	32	128	21.35232243	51.6674	4	16	1	16	1	28	1	1	5	5	10	10	1	0	15	15	0	0	0
C04216	C35H60O7P2	104	654.7942	654.3814273	64.1995	9.2359	17.104	0	9.4606	0	0	206.58	193.0013135	17.20413265	93.58897791	6.411526705	650.4210684	11.62384141	34.19964461	5	3	7	3	NaN	5.374327831	10.25559016	8	8	72.75392162	191.9409	17	128	64	2	1	103	0	0	0	0	44	43	0	0	44	43	0	0	0
C04217	C25H44O7P2	78	518.5602	518.2562268	57.9041	8.5524	21.5975	0	11.9461	0	0	191.25	147.8435781	13.45759241	70.23640803	5.90507492	496.6084964	9.553288801	25.92577262	5	3	7	3	NaN	2.054899281	6.936161611	8	8	54.85761463	144.3357	17	32	16	2	1	77	0	0	0	0	34	33	0	0	34	33	0	0	0
C04225	C7H8O6	21	188.1348	188.032088	44.6886	4.286	51.0253	0	0	0	0	32.71	51.63304797	5.071254862	34.54684674	4.121314469	154.8385815	5.70119189	10.11973102	6	3	9	3	NaN	-8.029464245	-0.125486453	16	16	15.2636018	39.5876	39	2	2	1	13	20	0	0	0	0	13	12	0	0	13	12	0	0	0
C04257	C8H16NO9P	35	301.1877	301.0562676	31.9022	5.3545	47.8089	4.6505	10.2839	0	0	65.53	70.98593582	6.340152203	45.86799517	4.779495171	238.3025709	8.021403201	12.15229939	8	6	10	6	0.217813685	-6.532150482	-3.344140443	256	256	24.0037282	57.8976	12	32	1	32	3	35	1	1	6	6	13	13	1	0	19	19	0	0	0
C04272	C5H10O4	19	134.1305	134.0579088	44.7724	7.5146	47.7129	0	0	0	0	11.2	39.76654808	4.360610476	27.46945937	3.512772032	124.3941049	6.066507534	8.418658891	4	3	5	3	0.306540117	-3.85664003	-0.821587792	16	16	11.85845	29.4405	3	2	1	2	3	18	0	0	0	0	9	8	0	0	9	8	0	0	0
C04281	C5H7NO3	16	129.114	129.0425931	46.512	5.4646	37.1751	10.8483	0	0	0	12.11	36.91673431	4.713970286	24.94224529	3.134144108	108.8935762	5.316325603	9.068870511	4	2	5	2	3.114540039	-4.309763218	-1.454563836	32	32	11.22509388	28.8459	6	4	1	4	17	16	1	1	5	5	4	4	1	0	9	9	0	0	0
C04294	C6H9NOS	18	143.207	143.0404846	50.3217	6.3345	11.1722	9.7807	0	22.3907	0	26.65	45.24686229	5.001842495	28.49883436	3.76523643	128.4262259	5.479107148	9.710969047	2	1	2	1	9.377128902	0.4171194	0.417159623	8	4	14.11912158	37.3233	10	1	1	1	1	18	1	1	5	5	4	4	0	1	4	4	5	5	0
C04297	C15H23N3O14P2	57	531.3023	531.0655255	33.9092	4.3634	42.159	7.9089	11.6596	0	0	156.16	111.0762394	7.761358283	63.58227375	5.352469111	402.5571169	10.41461675	15.41400178	13	6	17	7	1.214867586	-7.739909841	-3.29874186	256	18	42.83883223	104.7864	792	512	1	512	9	59	3	3	17	17	17	19	2	1	28	30	6	6	0
C04302	C12H16NO9P	39	349.2305	349.0562676	41.2703	4.6179	41.232	4.0107	8.8691	0	0	88.22	91.06257594	6.879118873	48.3277371	5.179974871	274.7221999	7.547157945	13.21932966	9	6	11	6	NaN	-5.814213332	-0.153586387	128	128	29.53319281	76.0805	96	16	1	16	1	40	2	2	11	11	12	13	1	1	17	18	6	6	1
C04322	C5H7NO2	15	113.1146	113.0476785	53.0908	6.2376	28.2888	12.3828	0	0	0	11.98	34.74049196	4.387854319	23.80466982	3.032533849	100.2859986	5.651053577	8.629933543	3	1	4	1	3.953218436	-3.166164551	-2.309719873	16	16	10.5236064	27.3973	6	2	1	2	11	15	1	1	5	5	3	3	1	0	8	8	0	0	0
C04324	C7H6O7	20	202.1183	202.0113525	41.5969	2.9921	55.411	0	0	0	0	39.49	52.274654	5.104804229	35.80897449	4.33433325	155.6211133	6.168958934	9.897006065	7	4	10	4	NaN	-9.984210199	-0.597302469	16	64	15.737384	42.8922	155	4	4	1	8	19	0	0	0	0	14	13	0	0	14	13	0	0	0
C04327	C6H10NO4PS	23	223.187	223.006815	32.2887	4.5161	28.6744	6.2758	13.8779	14.3669	0	69.98	54.65757451	5.302891842	35.85027169	3.820620022	173.3619237	7.113865658	10.31647866	4	2	5	2	2.095343074	-2.559006537	-0.528657049	16	8	18.70883903	48.1962	40	1	1	1	1	23	1	1	5	5	8	8	0	1	8	8	5	5	0
C04330	C31H44N6O16P	98	787.6854	787.2551409	47.2691	5.6303	32.4991	10.6693	3.9323	0	0	180.01	194.0603793	15.83741101	84.6745798	7.205387135	654.7959377	13.93650058	31.42773461	18	11	22	12	2.992826836	-14.50746277	-7.493176408	256	26	70.77200027	199.7781	3723	4096	1	4096	24	102	5	5	24	26	30	32	3	2	42	46	12	12	1
C04332	C13H18N4O6	41	326.3052	326.1226343	47.8506	5.5601	29.4192	17.1701	0	0	0	59.32	93.86726973	7.130785685	44.33788671	5.327251375	277.6235634	6.237517485	14.11322749	9	5	11	5	3.623657485	-3.05336325	-2.743198024	256	128	29.59614595	79.0005	89	8	1	8	3	42	2	2	10	11	13	13	0	2	13	13	10	11	0
C04352	C12H23N2O9PS	48	402.358	402.0861875	35.8209	5.7617	35.7877	6.9623	7.6981	7.9693	0	84.35	96.61261699	7.451783166	57.39458481	4.938374163	334.664606	8.37265468	14.90293722	8	7	12	7	NaN	-7.963886657	-1.966908166	256	13	34.79834012	87.4077	108	4	1	4	81	47	0	0	0	0	25	24	0	0	25	24	0	0	0
C04353	C8H9NO2	20	151.1626	151.0633285	63.5644	6.0011	21.1685	9.266	0	0	0	21.41	48.11841271	5.025469699	29.6600632	3.472409856	137.8774499	5.235519966	10.05388236	3	2	3	2	5.883871954	1.156418371	1.158292317	8	16	16.0333119	42.2428	15	2	2	1	3	20	1	1	6	6	5	5	0	1	5	5	6	6	1
C04376	C8H15N2O9P	35	314.1865	314.0515166	30.5823	4.8121	45.8309	8.9162	9.8584	0	0	71.24	76.58646091	6.042525719	45.6100402	5.11681133	243.0382379	6.094996146	11.65174491	8	6	11	6	NaN	-7.053817347	-3.867787449	256	13	24.6612879	60.2481	36	16	1	16	46	35	1	1	5	5	15	15	1	0	20	20	0	0	0
C04377	C31H45N6O16P	99	788.6934	788.2629659	47.2087	5.7509	32.4575	10.6556	3.9272	0	0	166.63	197.6994907	16.82619645	64.64239868	5.110589842	658.5360932	9.486399548	33.49422297	19	11	23	12	2.433695591	-10.82066682	-4.569198767	256	26	70.94083578	190.0835	2240	4096	1	4096	24	103	5	5	24	26	30	32	3	2	42	46	12	12	1
C04390	C9H16N2O5	32	232.2337	232.1059216	46.5463	6.9443	34.4468	12.0626	0	0	0	17.4	67.01663544	6.770630147	41.0313903	4.295301838	211.400154	8.4108328	12.27430906	6	4	9	5	2.778566518	-6.567205765	-3.685775871	128	128	21.26469758	53.0832	27	4	1	4	92	31	0	0	0	0	16	15	0	0	16	15	0	0	0
C04409	C7H7NO5	20	185.1342	185.0324223	45.4129	3.8111	43.2103	7.5657	0	0	0	32.6	51.234606	4.793347595	34.80095018	4.537833938	149.739066	6.217318777	9.476814281	6	3	9	4	0.967709204	-7.238853561	-3.750901286	16	64	15.6202935	43.6243	97	4	4	1	25	19	0	0	0	0	13	12	0	0	13	12	0	0	0
C04411	C7H12O5	24	176.1672	176.0684735	47.7245	6.8658	45.4097	0	0	0	0	18.41	51.24686811	4.885341043	34.34993628	4.221461387	160.8299558	6.40874425	9.769432491	5	3	7	3	NaN	-4.445072272	0.160932612	32	32	15.48484153	38.5993	9	4	1	4	16	23	0	0	0	0	12	11	0	0	12	11	0	0	0
C04425	C15H20N5O6S	47	398.414	398.1134291	45.2194	5.0598	24.0946	17.5781	0	8.0482	0	69.85	105.0777074	8.057619976	57.53906245	6.902188011	327.2348468	8.380597116	14.97178654	10	4	12	5	8.778477983	-5.467896754	-4.277657334	256	16	37.18488813	93.7198	395	32	1	32	18	49	3	3	14	15	13	14	1	2	18	19	9	10	0
C04431	C6H4O4	14	140.0936	140.0109586	51.44	2.8779	45.682	0	0	0	0	32.57	44.38338919	5.259897306	17.45111479	2.920020858	107.6548144	3.640904533	10.421055	3	1	5	1	NaN	-3.202686483	0.182959787	4	8	11.99846756	33.3257	34	2	2	1	2	14	1	1	5	5	5	5	1	0	10	10	0	0	0
C04435	C10H16O	27	152.2334	152.1201151	78.8966	10.5936	10.5098	0	0	0	0	31.95	51.23167667	5.049114414	34.66159815	4.090690217	168.4620697	7.081537404	9.426843882	1	0	2	0	NaN	2.716614901	2.716614901	2	4	18.76297619	49.0743	3	2	2	1	3	26	0	0	0	0	11	10	0	0	11	10	0	0	0
C04441	C13H21N5O4	43	311.3369	311.1593542	50.1512	6.7987	20.5557	22.4944	0	0	0	38.59	88.61399776	7.870332932	45.29596059	5.020842246	281.0362548	8.621963018	15.92478782	6	5	9	6	7.822180801	-4.814248083	-4.777725885	256	10	30.14302417	76.7407	216	4	1	4	176	43	1	1	5	5	17	17	0	1	17	17	5	5	0
C04442	C6H11O9P	27	258.1199	258.0140685	27.9189	4.2954	55.7859	0	11.9998	0	0	54.95	60.05948323	6.218337766	38.27741511	3.914787652	196.9666348	7.874686625	12.25341199	8	5	11	5	NaN	-8.213208443	-1.898597272	128	64	19.21910078	47.1892	20	4	1	4	26	26	0	0	0	0	16	15	0	0	16	15	0	0	0
C04453	C28H46O	75	398.6642	398.3548661	84.3566	11.6301	4.0133	0	0	0	0	123.71	124.9104243	10.5841983	47.93307905	4.58227827	439.2690685	7.71498081	21.01550421	1	0	2	0	NaN	7.863376111	7.863376111	4	4	49.27319705	124.1629	2	256	1	256	3	78	4	4	17	20	12	12	4	0	29	32	0	0	4
C04454	C9H17N4O9P	40	356.2264	356.0733147	30.3448	4.8101	40.4222	15.7279	8.695	0	0	85.35	84.51386728	7.129865523	52.11008191	4.980294429	275.700515	9.153947795	13.1102857	10	9	13	10	2.925116363	-7.489963064	-6.883375697	256	14	28.47497944	82.3575	140	8	1	8	9	40	1	1	6	6	17	17	0	1	17	17	6	6	0
C04468	C14H12O2	28	212.2439	212.0837296	79.2248	5.6988	15.0764	0	0	0	0	47.24	68.28018307	5.74850723	28.59888844	4.352893931	191.4724383	5.525969291	11.4601254	2	2	2	2	5.056268423	1.985947661	1.985947908	4	4	25.58737477	63.83	1	4	1	4	1	30	3	3	14	16	2	2	1	2	6	7	10	11	3
C04479	C9H10O6	25	214.1721	214.0477381	50.4717	4.7062	44.8221	0	0	0	0	35.18	67.22566371	5.766140285	35.01283111	4.611146909	181.2472547	5.568239639	11.28112203	6	3	9	3	NaN	-5.970400666	0.12213193	32	64	18.76493157	51.3374	90	4	4	1	153	24	0	0	0	0	15	14	0	0	15	14	0	0	0
C04484	C7H6O6	19	186.1189	186.0164379	45.1727	3.2493	51.578	0	0	0	0	47.91	48.3681796	4.800134664	33.36126817	3.843296666	147.1952419	6.463369516	9.27528557	6	3	9	3	NaN	-7.44661483	-0.755918721	16	64	15.16542017	41.9668	100	4	4	1	34	18	0	0	0	0	13	12	0	0	13	12	0	0	0
C04489	C30H39N9O12	90	717.6838	717.2718178	50.2061	5.4773	26.7517	17.5649	0	0	0	111.33	170.3214217	10.72854297	109.454499	8.824886268	611.510978	10.00749156	20.08334881	17	11	25	12	2.711817268	-15.77781163	-5.298378818	256	23	65.3323899	183.0569	4099	16	1	16	4347	92	3	3	16	17	35	36	1	2	39	41	12	12	1
C04494	C10H18N5O20P5	58	683.1402	682.9233206	17.5816	2.6558	46.8408	10.2517	22.6701	0	0	280.21	127.5663503	8.99269019	77.33165822	7.916077833	448.2062739	9.952839551	16.08173503	18	10	24	11	0.825159411	-16.35555655	-4.218745696	256	17	48.04522187	118.9856	5000	128	1	128	6	60	3	3	14	15	26	27	1	2	31	32	9	10	0
C04500	C33H59NO12P2	107	723.7686	723.3512494	54.7624	8.2165	26.5268	1.9352	8.559	0	0	239.74	182.6772669	12.7409431	87.99385611	6.103871162	679.4153362	12.10361126	25.58225363	9	6	12	6	0.462782013	0.124031382	4.861797012	256	14	73.25413481	186.8854	66	2048	8	256	3	107	1	1	6	6	42	42	1	0	48	48	0	0	0
C04501	C8H16NO9P	35	301.1877	301.0562676	31.9022	5.3545	47.8089	4.6505	10.2839	0	0	64.74	75.03699037	6.399677014	44.24084771	5.09023516	238.3663729	6.929195378	12.70786773	8	6	10	6	0.193199653	-6.541107516	-3.344140443	256	14	24.0037282	57.8976	12	32	1	32	3	35	1	1	6	6	13	13	1	0	19	19	0	0	0
C04525	C28H46O	75	398.6642	398.3548661	84.3566	11.6301	4.0133	0	0	0	0	128.41	124.156365	10.30501623	52.44179774	4.76250116	437.9399379	7.474278914	20.46448451	1	1	1	1	8.513550775	7.00860449	7.008604491	2	2	49.59029629	124.676	1	128	1	128	1	78	4	4	17	20	12	12	4	0	29	32	0	0	4
C04537	C41H72N2O17P2	134	926.9611	926.4306219	53.124	7.829	29.3421	3.0221	6.6829	0	0	261.68	227.8988986	14.07164968	116.7190149	8.491268212	853.7365891	11.46518396	27.93648731	14	9	18	9	0.660008478	-1.93484208	2.802926172	256	23	91.26672463	230.4	198	ERROR	ERROR	ERROR	9	135	2	2	12	12	50	51	2	0	62	63	0	0	0
C04554	C27H46O4	77	434.6517	434.33961	74.6089	10.6672	14.7239	0	0	0	0	127.35	121.7287909	9.264115853	64.32218029	5.627179611	456.224584	10.81650421	19.04211036	4	3	5	3	2.13259988	2.990053852	5.145429132	8	16	49.29003207	123.0503	3	2048	1	2048	2	80	4	4	17	20	14	14	4	0	31	34	0	0	4
C04556	C6H10N3O4P	24	219.1351	219.0408923	32.8857	4.5996	29.2046	19.1754	14.1346	0	0	59.94	58.78710099	6.01504743	29.52926559	3.876216786	171.7186059	7.157134605	11.87031971	6	3	7	4	3.782848057	-3.298812849	-3.738736431	32	32	18.43240097	50.0494	60	1	1	1	3	24	1	1	6	6	8	8	0	1	8	8	6	6	0
C04573	C17H25N3O18P2	65	621.3372	621.060834	32.8617	4.0555	46.3499	6.7628	9.97	0	0	169.38	110.6205324	8.100553793	75.9768112	5.885571271	464.3368631	11.93264449	14.71663468	15	9	21	9	0.443282343	-12.97631843	-4.964368734	256	23	48.53726788	117.4245	3168	2048	1	2048	18	67	3	3	17	17	23	25	2	1	34	36	6	6	0
C04575	C6H8O7	21	192.1235	192.0270026	37.5093	4.1971	58.2936	0	0	0	0	13.26	48.68302843	5.15136777	33.13550018	3.939547607	154.2384246	6.380301653	9.817650095	7	4	10	4	NaN	-5.06738708	-1.570635091	32	32	14.78556304	37.038	8	4	1	4	70	20	0	0	0	0	13	12	0	0	13	12	0	0	0
C04582	C6H13O7PS	28	260.202	260.01196	27.6955	5.0358	43.0419	0	11.9037	12.3231	0	58.85	61.55457339	6.012026836	41.30145798	4.320413451	205.0149815	7.898615511	12.45889024	6	4	8	4	NaN	-4.499174474	-1.277791835	128	64	21.44752516	53.3058	8	4	1	4	7	27	0	0	0	0	15	14	0	0	15	14	0	0	0
C04615	C47H82N2O22P2	155	1089.1017	1088.483445	51.832	7.5889	32.319	2.5722	5.6879	0	0	282.67	209.9611166	10.72021565	140.6356083	7.992592472	988.896261	13.58443132	21.29853553	19	12	23	12	0.661134664	-3.70568027	1.032090527	256	26	105.0264993	262.8133	198	ERROR	ERROR	ERROR	9	157	3	3	18	18	55	57	3	0	73	75	0	0	0
C04623	C14H9Cl5	28	354.486	351.9146888	47.4348	2.559	0	0	0	0	50.0062	41.67	70.30294313	6.114373318	50.02708329	4.922454823	257.0845472	9.763295577	13.36783048	0	0	0	0	NaN	6.457502399	6.457502399	1	1	32.83383675	85.3157	1	1	1	1	1	29	2	2	12	12	7	8	0	2	7	8	12	12	2
C04628	C11H22NO7PS	43	343.334	343.0854593	38.4808	6.4586	32.6201	4.0796	9.0215	9.3393	0	68.33	92.57238727	9.398427228	45.02164625	4.364110713	294.9846776	7.908895138	18.50224618	6	5	9	5	0.372033914	-5.271901247	0.779735601	128	128	30.93473596	77.7647	36	4	1	4	16	42	0	0	0	0	21	20	0	0	21	20	0	0	0
C04640	C8H16N3O8P	36	313.2017	313.067501	30.6785	5.1491	40.8667	13.4163	9.8894	0	0	74.59	77.72229676	5.624782747	45.19187112	5.321914641	245.551862	6.866500937	11.23062977	9	7	11	7	3.563008598	-6.566488442	-5.981992489	256	14	25.22285278	72.7201	36	16	1	16	46	36	1	1	5	5	15	15	1	0	20	20	0	0	0
C04644	C48H80N7O19P3S	158	1184.171	1183.444254	48.685	6.8094	25.671	8.2798	7.8469	2.7078	0	340.03	274.8887822	16.19876184	124.412992	7.082834303	1029.749289	14.20276444	32.99810041	19	11	25	12	2.122077614	-6.419066795	-1.786094393	256	27	112.6385233	282.6146	5000	ERROR	ERROR	ERROR	36	164	7	7	31	35	47	49	5	2	69	74	9	10	4
C04652	C43H77N3O20P2	145	1018.0271	1017.457565	50.7315	7.6237	31.4322	4.1276	6.0851	0	0	215.85	252.6851433	16.11622144	155.9152343	10.50558756	923.2550034	17.25549738	28.38081838	16	10	22	10	0.221120951	-0.862601022	3.876442328	256	25	97.08875018	240.2154	2734	8192	1	8192	9	147	3	3	17	17	51	53	2	1	62	64	6	6	0
C04666	C6H11N2O6P	26	238.1351	238.0354726	30.2619	4.6559	40.3117	11.7637	13.0068	0	0	65.99	59.914489	6.276517558	30.92764815	3.674762566	183.1897377	6.755800094	12.32574981	6	5	7	5	3.528920235	-5.056833256	-4.568954926	64	64	19.20609442	48.1795	32	4	1	4	2	26	1	1	5	5	10	10	0	1	10	10	5	5	0
C04677	C9H15N4O8P	37	338.2112	338.06275	31.9612	4.4703	37.8448	16.5656	9.1581	0	0	84.55	85.45697104	6.68988545	45.3410124	5.024213776	256.4452585	7.035901742	13.38328923	9	6	11	8	2.993136239	-5.870386622	-5.164311101	256	12	27.06201112	69.1421	136	16	1	16	2	38	2	2	10	10	12	13	1	1	17	18	5	5	0
C04691	C7H13O10P	31	288.1459	288.0246331	29.1779	4.5474	55.5253	0	10.7493	0	0	58.34	65.23146122	5.33278454	46.25003289	4.773383087	222.6008733	7.160394445	9.839627144	9	6	12	6	NaN	-8.828387225	-2.528932214	256	128	21.72997643	53.1517	20	8	1	8	42	30	0	0	0	0	18	17	0	0	18	17	0	0	0
C04692	C14H23N5O4	46	325.3635	325.1750042	51.6806	7.1251	19.6696	21.5247	0	0	0	52.23	94.84881616	7.926497402	46.10362309	4.907265935	298.7498594	8.123112388	16.24914758	6	5	9	5	8.2193575	-4.56965571	-4.541126876	256	10	31.96750245	81.5153	216	4	1	4	176	46	1	1	5	5	18	18	0	1	18	18	5	5	0
C04706	C6H3ClO4	14	174.539	173.9719863	41.2883	1.7325	36.6666	0	0	0	20.3124	32.48	48.96203152	5.249690103	19.80484891	3.296707328	121.5219223	4.276107974	10.40613433	3	1	5	1	NaN	-2.891786157	0.571912103	4	8	13.96139487	38.117	34	2	2	1	2	14	1	1	5	5	6	6	1	0	11	11	0	0	0
C04732	C9H16N4O6	35	276.2465	276.1069843	39.1304	5.8379	34.7503	20.2815	0	0	0	40.34	74.44240586	6.534361554	40.71672046	4.196257649	230.7713753	7.106119664	12.75443125	8	8	10	9	6.893995878	-4.391697248	-4.389022047	256	256	23.87157052	71.4846	35	8	1	8	9	35	1	1	6	6	13	13	0	1	13	13	6	6	0
C04734	C10H15N4O9P	39	366.2213	366.0576646	32.7963	4.1284	39.319	15.2986	8.4577	0	0	94.6	87.32118691	6.740348927	48.37821541	5.667752275	276.2604445	6.688668769	13.38837521	9	6	12	7	1.946765883	-5.850695419	-4.088412849	256	13	29.04612961	74.8142	324	16	1	16	4	40	2	2	10	10	14	15	1	1	19	20	5	5	0
C04738	C31H53N3O19P2	108	833.7087	833.2748496	44.6597	6.4076	36.4622	5.0401	7.4304	0	0	195.92	192.772368	10.60970651	129.0222941	11.34154906	710.8743687	16.58734673	20.50772926	15	9	21	9	0.461726649	-5.222581406	-0.483537767	256	24	74.62198766	183.462	2734	4096	1	4096	9	110	3	3	17	17	38	40	2	1	49	51	6	6	0
C04742	C20H32O3	55	320.4663	320.2351449	74.9576	10.0647	14.9776	0	0	0	0	49.52	109.1801599	11.73080798	42.61159631	4.37704539	339.6158413	7.226441876	23.19449072	3	2	4	2	1.612072484	3.192284151	5.356359744	4	8	37.74005682	101.4695	3	32	16	2	2	54	0	0	0	0	23	22	0	0	23	22	0	0	0
C04751	C9H14N3O9P	36	339.1959	339.0467656	31.8684	4.1602	42.4518	12.3882	9.1315	0	0	81.91	84.04301252	6.975119444	44.50272787	4.862066685	253.9528203	6.88696412	13.94896702	10	6	12	7	1.647577323	-6.99211057	-3.915065504	256	256	26.62786904	67.3199	136	16	1	16	1	37	2	2	10	10	12	13	1	1	17	18	5	5	0
C04752	C6H11N3O7P2	29	299.115	299.0072227	24.0925	3.7067	37.4424	14.0481	20.7103	0	0	109.11	69.82093807	6.730544921	36.3274177	4.152579187	216.6276378	8.274664651	12.71419497	8	4	10	5	2.304858184	-5.551791022	-3.293605971	64	64	23.20540837	60.9223	255	2	1	2	3	29	1	1	6	6	12	12	0	1	12	12	6	6	0
C04760	C48H80N7O20P3S	159	1200.17	1199.439168	48.036	6.7186	26.6619	8.1694	7.7423	2.6717	0	340.19	238.3281969	12.47466772	148.275511	9.304846311	1038.78709	13.37912715	23.0578884	20	12	26	13	2.125227383	-7.649877862	-3.01690546	256	29	113.3236002	284.1301	5000	ERROR	ERROR	ERROR	36	165	7	7	31	35	48	50	5	2	70	75	9	10	4
C04805	C20H32O3	55	320.4663	320.2351449	74.9576	10.0647	14.9776	0	0	0	0	48.02	104.6385949	9.818915389	61.31809959	5.6276121	339.6586642	9.408347861	19.09961308	3	2	4	2	1.515985031	2.971008826	5.356359744	4	8	37.74005682	101.4695	3	32	16	2	2	54	0	0	0	0	23	22	0	0	23	22	0	0	0
C04807	C7H11N5O8P2	33	355.1385	355.0082854	23.6738	3.122	36.0409	19.7201	17.4432	0	0	117.26	82.12620423	7.15044758	42.82696435	4.5084122	247.3977656	7.150381793	14.12831511	11	6	13	7	1.914487552	-5.853201632	-2.039679452	256	14	27.04885015	75.9417	1581	2	1	2	23	34	2	2	10	11	12	12	1	1	16	17	6	6	0
C04823	C13H19N4O12P	49	454.2833	454.0737086	34.3704	4.2156	42.2628	12.333	6.8182	0	0	90.51	104.9644035	7.476087813	57.70163669	5.457968528	346.3641282	10.3860472	14.76088916	13	8	17	9	2.03834561	-11.66971102	-4.93669106	256	16	35.769099	90.6527	1224	32	1	32	21	50	2	2	10	10	20	21	1	1	25	26	5	5	0
C04824	C34H66NO12P	114	711.8611	711.4322631	57.3657	9.3451	26.9705	1.9676	4.3511	0	0	146.43	215.5471857	16.99573593	103.9552826	9.328578835	700.7769021	8.924410521	33.53167903	10	7	13	7	NaN	2.617914534	5.816945157	256	18	72.78730594	180.5559	36	128	1	128	3	114	1	1	6	6	42	42	1	0	48	48	0	0	0
C04831	C15H19NO10	45	373.3121	373.1008958	48.26	5.13	42.858	3.752	0	0	0	59.82	93.78136783	7.516650255	51.66013315	5.132492609	306.2789961	6.99311727	14.99855607	10	5	11	5	2.509891219	-1.88251636	-1.825424382	256	14	32.86378927	80.8838	48	64	1	64	1	47	3	3	16	17	10	11	2	1	20	22	6	6	1
C04840	C29H48O3	80	444.6896	444.3603454	78.3266	10.8798	10.7936	0	0	0	0	138.66	128.4958405	10.77126656	50.6397857	4.639949195	474.1049575	8.113641514	21.42837864	3	2	4	2	0.778919688	4.667715023	7.047555306	4	4	52.11986107	131.2034	3	512	1	512	1	83	4	4	17	20	15	15	4	0	32	35	0	0	4
C04874	C9H13N5O4	31	255.2306	255.0967539	42.3524	5.1339	25.0744	27.4393	0	0	0	34.81	68.84696383	6.52747059	37.22035217	4.084262724	208.0557637	6.802316457	13.05412919	8	6	9	7	7.012358668	-2.994676117	-2.994410466	256	16	22.65350161	69.857	82	4	1	4	53	32	2	2	10	11	8	8	1	1	12	13	6	6	0
C04895	C9H16N5O13P3	46	495.1703	494.9957452	21.8301	3.2569	42.0042	14.1433	18.7655	0	0	169.36	100.1922963	7.693793265	56.7662841	5.229123042	342.7443182	7.975786209	15.18711349	14	9	18	10	1.589823719	-11.20420035	-6.617947227	256	18	36.82671124	102.4757	4862	16	1	16	47	47	2	2	10	11	20	20	1	1	24	25	6	6	0
C04896	C15H25N5O15P2	62	577.331	577.0822382	31.2058	4.3647	41.569	12.1306	10.73	0	0	158.15	128.5306554	9.214447734	65.30574732	6.132218783	432.4159912	8.884430022	18.06308035	16	10	19	11	1.444712124	-9.119226724	-7.124390767	256	21	45.463652	114.5739	1632	512	2	256	4	64	3	3	15	15	22	24	2	1	32	34	5	5	0
C04916	C15H25N5O15P2	62	577.331	577.0822382	31.2058	4.3647	41.569	12.1306	10.73	0	0	157.43	135.7708893	10.96020711	69.26824416	6.915543272	437.4946334	10.20662969	22.13941571	16	10	20	11	1.378855944	-8.787350551	-7.493247133	256	23	45.55714236	116.2123	2666	128	2	64	68	63	2	2	10	10	27	28	1	1	32	33	5	5	0
C05011	C26H29NO2	58	387.514	387.2198292	80.585	7.543	8.2575	3.6145	0	0	0	102.4	108.0057894	8.619849241	71.05649827	6.63587916	382.5292034	8.685004321	17.25549017	3	1	3	1	9.008571015	4.281676742	5.689914675	8	8	47.03717727	130.4117	213	2	2	1	1	60	3	3	18	18	11	13	0	3	11	13	18	18	3
C05108	C29H48O	78	412.6908	412.3705162	84.3998	11.7233	3.8768	0	0	0	0	145.01	108.5452546	8.585502574	69.14994843	5.882439489	455.2062653	11.15423532	17.41008181	1	1	1	1	9.38318035	7.406625396	7.406625401	2	2	51.4368601	130.0696	1	128	1	128	1	81	4	4	17	20	13	13	4	0	30	33	0	0	4
C05111	C28H48O	77	400.6801	400.3705162	83.9322	12.0747	3.9931	0	0	0	0	128.44	114.3520208	9.142052042	64.63314024	5.384345603	445.7677181	10.54267884	18.41473906	1	1	1	1	8.952598147	7.477861854	7.477861857	2	2	49.8243515	125.0881	1	512	1	512	1	80	4	4	17	20	12	12	4	0	29	32	0	0	4
C05123	C2H6O4S	13	126.132	125.9986794	19.0447	4.7947	50.7386	0	0	25.4218	0	36.43	34.19588255	4.353765557	23.46077506	3.155704072	98.26666459	6.14515268	8.281820406	4	2	6	2	NaN	-3.874684789	-2.909391904	4	8	9.935904	22.9476	5	1	1	1	9	12	0	0	0	0	7	6	0	0	7	6	0	0	0
C05125	C14H23N4O8P2S	52	469.367	469.0711824	35.8248	4.9391	27.2697	11.9367	13.1981	6.8315	0	143.89	110.8564811	9.04041432	61.45277482	5.997589052	370.6500602	7.868584332	18.14538662	9	5	11	6	4.168021278	-8.190782869	-7.149731504	256	128	40.38284495	116.5795	3060	4	1	4	3	53	2	2	11	11	18	19	0	2	18	19	11	11	0
C05130	C5H6N2O	14	110.1139	110.0480128	54.5376	5.4922	14.5299	25.4404	0	0	0	17.97	36.5021316	4.159666201	22.66539975	3.168956209	97.51935852	5.804895617	8.188770658	2	1	3	1	9.634880644	-0.37274088	-0.280241844	16	16	10.91780694	29.023	16	1	1	1	4	14	1	1	5	5	3	3	0	1	3	3	5	5	0
C05135	C7H11N3O	22	153.1817	153.090212	54.8857	7.238	10.4447	27.4315	0	0	0	22.9	52.71668089	6.153376183	26.67356937	3.709007128	142.9270441	5.911639889	11.81596048	2	2	3	2	9.832299376	-1.000673006	-0.882124541	16	16	15.73539627	41.1072	24	1	1	1	6	22	1	1	5	5	6	6	0	1	6	6	5	5	0
C05139	C19H28O3	50	304.4238	304.2038448	74.9624	9.2707	15.7669	0	0	0	0	77.01	84.22576715	7.11033076	41.2037835	4.384276433	301.8315546	7.945549471	14.18252607	3	2	4	2	5.995225248	2.490638954	2.490639135	16	8	33.87831364	86.1511	2	128	1	128	4	53	4	4	17	20	5	5	4	0	22	25	0	0	4
C05141	C18H24O3	45	288.3814	288.1725446	74.9676	8.3884	16.644	0	0	0	0	68.79	87.77937376	7.308767083	39.66778287	4.132899882	278.5620346	6.755754902	14.40230822	3	3	3	3	3.70549435	2.67039427	2.670597721	8	8	31.92582396	81.2662	7	64	1	64	1	48	4	4	17	20	4	4	3	1	15	18	6	6	4
C05158	C15H18O8	41	326.2986	326.1001676	55.2134	5.5602	39.2264	0	0	0	0	46.13	92.6905419	6.487090977	54.35208265	6.474622099	279.7145062	6.67347427	12.20095514	8	5	9	5	0.444828245	-3.5327799	-0.435547155	128	13	30.5477473	77.1852	41	64	2	32	2	42	2	2	12	12	11	12	1	1	17	18	6	6	1
C05198	C10H13N5O3	31	251.2419	251.1018393	47.8053	5.2154	19.1044	27.8749	0	0	0	46.14	71.09523334	6.193990488	35.93448279	4.158066958	207.5169283	6.530205584	12.50271901	7	3	7	4	8.801025483	-1.049575433	-1.044053905	128	128	23.860281	61.6519	79	16	1	16	3	33	3	3	14	15	4	5	1	2	9	10	9	10	0
C05200	C37H54O4	95	562.8223	562.4022102	78.9585	9.6707	11.3708	0	0	0	0	164.33	169.6713907	15.67432559	76.3980945	5.787276601	591.8997214	11.33079972	31.36751051	4	3	5	3	NaN	8.262636782	11.05083646	8	8	67.71997642	180.5318	48	32	32	1	1	95	1	1	6	6	35	35	0	1	35	35	6	6	1
C05235	C3H6O2	11	74.0785	74.03677944	48.6404	8.1638	43.1958	0	0	0	0	2.8	27.73989905	3.649620022	19.02336742	2.932824081	72.8723267	4.623254165	7.017698406	2	1	3	1	5.302360926	-0.710968295	-0.710968238	8	8	6.9989956	17.897	2	1	1	1	4	10	0	0	0	0	5	4	0	0	5	4	0	0	0
C05239	C3H5N3	11	83.0919	83.04834718	43.3642	6.0652	0	50.5706	0	0	0	15.43	31.35176067	3.780873968	17.38673079	3.085454346	72.51383677	3.454057798	7.540947918	2	2	2	3	11.08857952	-1.425447036	-0.884859152	8	8	8.297164596	22.9665	10	1	1	1	2	11	1	1	5	5	1	1	0	1	1	1	5	5	0
C05259	C37H64N7O18P3S	130	1019.926	1019.324139	43.5714	6.3248	28.2363	9.6131	9.1106	3.1439	0	268.98	223.1332176	13.80074004	137.0965238	10.28914348	870.7989488	14.02967328	24.60937966	18	9	25	10	2.120196384	-5.975248416	-1.342224109	256	24	94.22723982	237.3411	5000	128	1	128	108	132	3	3	14	15	52	53	1	2	57	58	9	10	0
C05263	C33H56N7O18P3S	118	963.82	963.2615382	41.1231	5.8563	29.88	10.1727	9.6409	3.3269	0	277.85	212.9635984	13.67136678	125.0486639	8.563906414	802.7916676	12.38360439	25.1173435	18	9	25	10	2.120196384	-7.753523076	-3.120498769	256	24	86.97311405	218.9371	5000	128	1	128	108	120	3	3	14	15	48	49	1	2	53	54	9	10	0
C05265	C31H52N7O18P3S	112	935.767	935.2302381	39.7889	5.6011	30.7757	10.4777	9.93	3.4266	0	249.93	204.8829004	13.17295887	115.7908633	7.458316268	768.3743883	11.59768647	24.81037471	18	9	25	10	2.120196384	-8.642660406	-4.009636099	256	24	83.35258982	209.7351	5000	128	1	128	108	114	3	3	14	15	46	47	1	2	51	52	9	10	0
C05267	C29H48N7O18P3S	106	907.714	907.198938	38.3723	5.33	31.7269	10.8015	10.2368	3.5325	0	262.94	191.2767627	12.10785612	106.202563	7.44298679	734.5347098	10.9214945	23.57648039	18	9	25	10	2.120196384	-9.531797736	-4.898773429	256	24	79.73701077	200.5331	5000	128	1	128	108	108	3	3	14	15	44	45	1	2	49	50	9	10	0
C05269	C27H44N7O18P3S	100	879.661	879.1676379	36.8652	5.0416	32.7387	11.146	10.5633	3.6452	0	265.72	174.2974085	10.67695776	97.40205561	7.149562935	700.9768857	12.85307683	20.78862866	18	9	25	10	2.120196384	-10.42093501	-5.787910759	256	24	76.12689294	191.3311	5000	128	1	128	108	102	3	3	14	15	42	43	1	2	47	48	9	10	0
C05270	C27H46N7O17P3S	101	865.677	865.1883733	37.4607	5.356	31.4193	11.326	10.7339	3.704	0	256.93	180.7853764	12.38826328	92.70319094	6.160783429	699.0291679	12.57579703	24.56317771	17	9	23	10	2.120196387	-9.753599799	-5.120627397	256	23	75.94645822	190.6379	5000	128	1	128	36	103	3	3	14	15	41	42	1	2	46	47	9	10	0
C05271	C27H44N7O17P3S	99	863.661	863.1727232	37.5482	5.135	31.4927	11.3525	10.759	3.7127	0	239.9	179.9802163	12.26515271	93.87507093	6.881213782	690.1730342	12.4815597	24.81358582	17	9	23	10	2.120196383	-9.522442976	-4.889470574	256	23	75.69148851	191.7312	5000	256	2	128	36	101	3	3	14	15	41	42	1	2	46	47	9	10	0
C05272	C37H64N7O17P3S	129	1003.927	1003.329224	44.2658	6.4256	27.0926	9.7663	9.2558	3.194	0	264.27	223.2324372	18.49402513	94.59181137	7.048433656	860.9200576	13.72580458	36.61548409	17	9	23	10	2.120196383	-5.076756326	-0.443783924	256	23	93.81654107	237.7412	5000	256	2	128	36	131	3	3	14	15	51	52	1	2	56	57	9	10	0
C05273	C35H60N7O17P3S	123	975.874	975.2979238	43.0767	6.1972	27.8714	10.0471	9.5219	3.2858	0	280.81	221.0148205	16.80680891	108.6905753	7.38265331	827.2801015	15.52218948	33.40375513	17	9	23	10	2.120196383	-5.965893656	-1.332921254	256	23	90.18296331	228.5392	5000	256	2	128	36	125	3	3	14	15	49	50	1	2	54	55	9	10	0
C05274	C31H54N7O17P3S	113	921.783	921.2509736	40.3926	5.9047	29.5069	10.6367	10.0806	3.4786	0	281.54	203.6455553	14.76303468	101.8862987	6.916091957	767.8219798	12.57854517	29.65649722	17	9	23	10	2.120196387	-7.975325139	-3.342352737	256	23	83.18181589	209.0419	5000	128	1	128	36	115	3	3	14	15	45	46	1	2	50	51	9	10	0
C05275	C31H52N7O17P3S	111	919.768	919.2353235	40.481	5.6985	29.5716	10.66	10.1027	3.4862	0	273.69	199.6299383	14.50827105	97.04322546	7.164617225	759.219657	13.60831223	28.9174899	17	9	23	10	2.120196383	-7.744168316	-3.111195914	256	23	82.92780902	210.1352	5000	256	2	128	36	113	3	3	14	15	45	46	1	2	50	51	9	10	0
C05276	C29H48N7O17P3S	105	891.714	891.2040234	39.0608	5.4256	30.5019	10.9953	10.4205	3.5959	0	260.08	191.9041827	13.44461204	94.00240773	6.92092221	724.7272141	12.57335232	27.26323428	17	9	23	10	2.120196383	-8.633305646	-4.000333244	256	23	79.30705308	200.9332	5000	256	2	128	36	107	3	3	14	15	43	44	1	2	48	49	9	10	0
C05290	C19H26O3	48	302.4079	302.1881947	75.4621	8.6659	15.872	0	0	0	0	80.56	80.81554516	6.587589643	46.90765367	4.462728778	295.4544671	8.322708594	13.11922893	3	1	5	1	8.766188925	2.648179847	2.648179847	64	32	33.33251278	85.3822	6	32	1	32	10	51	4	4	17	20	5	5	4	0	22	25	0	0	4
C05291	C19H28O3	50	304.4238	304.2038448	74.9624	9.2707	15.7669	0	0	0	0	76.25	80.8097444	6.918375241	47.70919025	4.262334324	301.9750977	7.824134974	13.40137896	3	2	4	2	8.400629559	2.056658495	2.056658501	32	32	33.87831364	86.0223	3	128	1	128	5	53	4	4	17	20	5	5	4	0	22	25	0	0	4
C05294	C19H28O3	50	304.4238	304.2038448	74.9624	9.2707	15.7669	0	0	0	0	78.72	83.47776575	7.104207649	46.38670772	4.132407978	302.0347343	7.5626582	13.78548237	3	2	4	2	8.953743795	2.084652137	2.084652141	32	32	33.87831364	86.2045	3	64	1	64	5	53	4	4	17	20	5	5	4	0	22	25	0	0	4
C05296	C19H26O3	48	302.4079	302.1881947	75.4621	8.6659	15.872	0	0	0	0	76.86	83.16561137	6.725432398	44.13101969	4.455970966	295.2776643	6.694081144	13.42734624	3	1	5	1	8.262066521	2.620186209	2.620186206	64	32	33.33251278	85.2	6	64	1	64	10	51	4	4	17	20	5	5	4	0	22	25	0	0	4
C05297	C19H24O3	46	300.3921	300.1725446	75.9685	8.053	15.9785	0	0	0	0	80.8	80.57240479	6.563061411	46.64165728	4.466498274	289.08169	7.588863453	13.061932	3	0	6	0	NaN	2.96202735	2.96202735	64	32	32.78700247	84.3993	12	32	1	32	10	49	4	4	17	20	5	5	4	0	22	25	0	0	4
C05298	C18H22O3	43	286.3655	286.1568946	75.4953	7.7435	16.7612	0	0	0	0	67.53	86.1128545	6.891876598	41.540708	4.532046851	271.5210922	6.208254716	13.92715932	3	2	4	2	NaN	4.004542488	4.005463712	16	8	31.36545408	81.0633	28	16	1	16	2	46	4	4	17	20	4	4	3	1	15	18	6	6	4
C05300	C18H22O3	43	286.3655	286.1568946	75.4953	7.7435	16.7612	0	0	0	0	67.12	79.81222955	6.713754546	45.03946166	4.192344051	271.7176709	8.42082415	13.42759168	3	2	4	2	3.419573174	3.437759537	3.437963113	16	8	31.37983834	80.5746	14	32	1	32	4	46	4	4	17	20	4	4	3	1	15	18	6	6	4
C05301	C18H24O3	45	288.3814	288.1725446	74.9676	8.3884	16.644	0	0	0	0	69.82	86.86280574	7.304808304	39.86197948	4.343695348	278.3039147	7.102413091	14.44272531	3	3	3	3	4.402983215	3.44101493	3.441936007	8	8	31.91140839	81.8856	14	32	1	32	1	48	4	4	17	20	4	4	3	1	15	18	6	6	4
C05302	C19H26O3	48	302.4079	302.1881947	75.4621	8.6659	15.872	0	0	0	0	74.08	92.95340413	7.238648134	46.26254625	4.955516795	295.8938912	6.583276827	14.13242795	3	2	3	2	4.698641837	3.587609222	3.587830063	8	8	33.82419076	86.3679	14	32	1	32	1	51	4	4	17	20	5	5	3	1	16	19	6	6	4
C05313	C38H56O4	98	576.8488	576.4178603	79.1207	9.785	11.0943	0	0	0	0	157.72	169.9689753	14.6508145	81.95122287	6.133182248	609.0564954	10.16639171	29.28815093	4	2	5	2	NaN	8.406283517	11.19673051	8	8	69.64019956	185.0141	48	32	32	1	1	98	1	1	6	6	36	36	0	1	36	36	6	6	1
C05335	C5H11NO2Se	20	196.11	196.9955004	30.6224	5.6536	16.3168	7.1423	0	0	0	7.04	46.86343398	5.138043392	29.02448475	3.460324107	142.4603808	6.033559944	10.26829403	3	2	4	3	5.525934502	-2.773623869	-2.77246043	8	8	12.30153845	42.9074	3	2	1	2	4	19	0	0	0	0	9	8	0	0	9	8	0	0	0
C05337	C45H74N7O19P3S	149	1142.091	1141.397303	47.3239	6.5308	26.6168	8.5849	8.1361	2.8076	0	328.95	241.910991	17.23387323	150.3662358	9.127629378	978.0956626	14.31856078	33.70971422	19	11	25	12	2.122077614	-7.851190403	-3.218218001	256	27	107.1800542	268.8381	5000	ERROR	ERROR	ERROR	36	155	7	7	31	35	44	46	5	2	66	71	9	10	4
C05338	C29H42N7O18P3S	100	901.666	901.1519878	38.6296	4.695	31.9397	10.874	10.3055	3.5562	0	270.53	168.2270688	10.47697731	92.7966959	6.149073747	710.104501	12.55781083	20.98166001	18	10	24	11	2.120196234	-10.25843628	-5.624094755	256	25	78.79189513	198.9108	4427	128	1	128	36	103	4	4	20	21	38	40	1	3	43	45	15	16	1
C05345	C6H13O9P	29	260.1358	260.0297185	27.7025	5.0371	55.3536	0	11.9068	0	0	60.63	63.41733778	5.796798518	38.17065227	4.51951038	198.7140007	6.683832761	11.02895816	8	6	9	6	NaN	-6.071026526	-2.881565349	128	256	19.793746	47.2337	4	16	1	16	1	29	1	1	5	5	11	11	1	0	16	16	0	0	0
C05356	C20H32O4	56	336.4657	336.2300595	71.3933	9.5861	19.0205	0	0	0	0	51.85	106.4523772	9.706809414	58.19091232	5.514273607	348.7988845	9.619456646	19.71032341	4	2	5	2	0.067679517	3.244406819	5.805695121	8	8	38.42090435	102.8197	3	32	16	2	2	55	0	0	0	0	24	23	0	0	24	23	0	0	0
C05378	C6H14O12P2	34	340.1157	339.9960489	21.1881	4.1489	56.4493	0	18.2137	0	0	104.81	75.34111018	6.676096999	48.41980688	5.114994624	243.7639519	7.997112297	13.37349283	10	7	12	7	NaN	-9.431832069	-3.005131381	256	12	24.46880327	58.1066	16	16	1	16	1	34	1	1	5	5	15	15	1	0	20	20	0	0	0
C05379	C6H6O7	19	190.1076	190.0113525	37.9071	3.1812	58.9118	0	0	0	0	11.85	47.96210745	5.316168388	32.76886637	3.847225739	147.8009589	6.952303467	10.62545355	7	3	11	3	NaN	-9.144501461	-0.374584422	64	32	13.96636751	35.1747	45	2	1	2	15	18	0	0	0	0	13	12	0	0	13	12	0	0	0
C05381	C16H25N4O10P2S	58	527.403	527.0766618	36.4373	4.7778	30.3362	10.6231	11.7458	6.0798	0	155.99	120.4842101	8.550064325	73.69866306	6.516035961	415.6005977	8.610267564	16.44630287	11	6	14	7	3.289849466	-10.11388681	-7.52261961	256	12	44.72260129	127.3699	3930	4	1	4	6	59	2	2	11	11	22	23	0	2	22	23	11	11	0
C05382	C7H15O10P	33	290.1618	290.0402832	28.9752	5.2106	55.1396	0	10.6747	0	0	58.76	66.82676612	5.875696401	43.94048071	4.624241534	229.0621792	7.265587685	11.80201463	9	7	11	7	NaN	-6.998815975	-4.020932865	256	15	22.39795463	54.3972	8	16	1	16	12	32	0	0	0	0	18	17	0	0	18	17	0	0	0
C05401	C9H18O8	35	254.2344	254.1001676	42.5184	7.1363	50.3454	0	0	0	0	28.27	63.47153458	5.700751241	42.61989902	4.452239971	223.0258774	8.587992953	11.88161708	8	6	8	6	4.811705732	-3.609852439	-3.609849668	256	15	22.04573188	52.9294	1	64	1	64	1	35	1	1	6	6	11	11	1	0	17	17	0	0	0
C05402	C12H22O11	45	342.2965	342.1162115	42.1063	6.4782	51.4155	0	0	0	0	39.81	78.27497013	6.803170382	50.31128946	4.599067149	289.4109199	7.884792058	13.24326988	11	8	11	8	4.252825899	-4.703399362	-4.703374864	256	17	28.9697942	68.3367	1	1024	1	1024	1	46	2	2	12	12	11	12	2	0	23	24	0	0	0
C05404	C18H32O16	66	504.4371	504.169035	42.8582	6.3941	50.7477	0	0	0	0	83.89	111.1718005	8.045886842	76.36375123	6.411243345	425.7831988	8.731814394	15.8670198	16	11	16	11	4.233007788	-6.474236895	-6.474210509	256	20	42.78405373	100.75	1	32768	1	ERROR	1	68	3	3	18	18	16	18	3	0	34	36	0	0	0
C05411	C5H10O6	21	166.1293	166.0477381	36.1487	6.0672	57.7841	0	0	0	0	9.25	45.14194549	5.182324276	28.00543423	3.372802391	141.5569444	6.527310208	10.21057756	6	5	7	5	0.246441283	-6.0449297	-2.779409369	64	64	13.30691364	32.3085	3	8	1	8	9	20	0	0	0	0	11	10	0	0	11	10	0	0	0
C05412	C5H10O6	21	166.1293	166.0477381	36.1487	6.0672	57.7841	0	0	0	0	9.25	45.14194549	5.182324276	28.00543423	3.372802391	141.5569444	6.527310208	10.21057756	6	5	7	5	0.246441283	-6.0449297	-2.779409369	64	64	13.30691364	32.3085	3	8	1	8	9	20	0	0	0	0	11	10	0	0	11	10	0	0	0
C05413	C40H64	104	544.9362	544.500802	88.1622	11.8377	0	0	0	0	0	155.2	192.7522864	17.98322702	82.99579633	6.547141934	622.2985291	13.30558169	35.94598714	0	0	0	0	NaN	13.37951845	13.37951845	1	1	72.57547137	193.3396	1	72	72	1	1	103	0	0	0	0	40	39	0	0	40	39	0	0	0
C05414	C40H62	102	542.9203	542.485152	88.4896	11.5104	0	0	0	0	0	152.05	189.9248023	18.00225432	66.40784827	5.429954018	614.3840054	10.67407703	36.06857293	0	0	0	0	NaN	13.01759679	13.01759679	1	1	72.34956906	194.4562	1	256	256	1	1	101	0	0	0	0	40	39	0	0	40	39	0	0	0
C05418	C27H46O2	75	402.6529	402.3497807	80.5381	11.5149	7.947	0	0	0	0	228.41	122.4932805	10.87001585	44.37529015	4.330031893	433.7525819	8.347902227	21.66235317	2	1	2	1	6.218890277	6.373174703	6.373174706	4	4	48.14096579	119.1024	1	1024	1	1024	1	79	5	5	18	22	11	11	5	0	29	33	0	0	4
C05421	C40H64	104	544.9362	544.500802	88.1622	11.8377	0	0	0	0	0	158.76	187.4402319	12.86896962	115.3828826	11.00416053	622.4026734	7.896849435	24.47802013	0	0	0	0	NaN	13.37951845	13.37951845	1	1	72.57547137	193.3396	1	72	72	1	1	103	0	0	0	0	40	39	0	0	40	39	0	0	0
C05427	C20H42O7P2	71	456.4908	456.2405767	52.6219	9.2737	24.5341	0	13.5704	0	0	150.42	128.3699405	11.3860558	65.79773639	5.764267295	442.8958849	11.28202696	22.82373408	5	3	7	3	NaN	1.611923451	6.49318578	8	8	46.68104523	117.9831	17	16	2	8	1	70	0	0	0	0	29	28	0	0	29	28	0	0	0
C05430	C40H60	100	540.9044	540.4695019	88.8194	11.1806	0	0	0	0	0	145.36	194.0829887	17.75794291	70.75677988	5.745197806	605.8270034	9.511797863	35.49165756	0	0	0	0	NaN	12.65567513	12.65567513	1	1	72.12411072	195.5728	1	272	272	1	1	99	0	0	0	0	40	39	0	0	40	39	0	0	0
C05432	C40H56	96	536.8726	536.4382018	89.4864	10.5136	0	0	0	0	0	181.79	190.7644727	17.89368426	60.51033237	5.384143811	591.2683812	8.315619405	35.7284712	0	0	0	0	NaN	11.93183182	11.93183182	1	1	71.67456195	197.806	1	1056	1056	1	1	95	0	0	0	0	40	39	0	0	40	39	0	0	0
C05433	C40H56	96	536.8726	536.4382018	89.4864	10.5136	0	0	0	0	0	175.85	176.442179	14.54603834	61.58800527	6.005733999	584.465085	10.61733289	29.1922888	0	0	0	0	NaN	11.16773892	11.16773892	1	1	70.62342249	191.8784	1	1024	512	2	1	97	2	2	12	12	28	29	2	0	40	41	0	0	2
C05437	C27H44O	72	384.6377	384.339216	84.3102	11.5302	4.1596	0	0	0	0	127.34	122.3202495	10.49493305	46.82652189	4.296168132	420.4526577	7.625476838	20.93732758	1	1	1	1	8.513550775	6.663651723	6.663651725	2	2	47.74376822	121.1999	1	128	1	128	1	75	4	4	17	20	11	11	4	0	28	31	0	0	4
C05440	C28H42O	71	394.6325	394.323566	85.2184	10.7273	4.0543	0	0	0	0	144.02	103.2086031	7.168791394	73.71456399	6.28383721	422.8015984	9.296803942	14.16308095	1	1	1	1	8.458372562	6.284761177	6.284761178	2	2	49.12356998	126.9092	1	256	2	128	1	74	4	4	17	20	12	12	4	0	29	32	0	0	4
C05444	C27H48O3	78	420.6682	420.3603454	77.089	11.501	11.41	0	0	0	0	124.9	124.8436377	10.2614705	54.93620047	4.563652139	453.8148851	9.180243458	20.6601834	3	3	3	3	8.416246369	4.850978819	4.850978828	8	8	49.40406154	123.2107	1	2048	1	2048	1	81	4	4	17	20	13	13	4	0	30	33	0	0	4
C05445	C27H46O3	76	418.6523	418.3446953	77.4602	11.0749	11.4649	0	0	0	0	103.26	122.7641583	10.27943802	51.57117398	4.67647528	446.9889989	7.988310738	20.03218214	3	2	4	2	7.761501953	4.986812869	4.98681288	16	16	48.85596248	122.1249	2	2048	1	2048	2	79	4	4	17	20	13	13	4	0	30	33	0	0	4
C05447	C48H78N7O19P3S	156	1182.155	1181.428604	48.768	6.6505	25.7148	8.2939	7.8603	2.7124	0	369.26	266.0364434	13.58090521	142.0890777	9.492361374	1022.786156	13.05415559	27.46010572	19	11	25	12	2.12207761	-6.335345761	-1.702373359	256	26	112.3867571	283.4905	5000	ERROR	ERROR	ERROR	36	162	7	7	31	35	47	49	5	2	69	74	9	10	4
C05460	C48H78N7O20P3S	157	1198.154	1197.423518	48.1168	6.5617	26.7068	8.1832	7.7554	2.6762	0	338.53	256.0017706	15.16399445	148.0445138	8.831170004	1030.027992	19.9886876	31.3699737	20	12	26	13	2.125227382	-7.566156828	-2.933184426	256	28	113.0714902	285.006	5000	ERROR	ERROR	ERROR	36	163	7	7	31	35	48	50	5	2	70	75	9	10	4
C05512	C10H12N4O4	30	252.2267	252.0858549	47.6187	4.7954	25.373	22.2129	0	0	0	49.06	70.50089524	6.316827092	35.89848049	4.098390037	204.0620398	5.994317939	12.47343049	6	3	7	3	4.770650088	-1.582344083	-1.577899974	64	64	22.45079098	59.8211	69	8	1	8	3	32	3	3	14	15	4	5	1	2	9	10	9	10	0
C05515	C5H6N4O3	18	170.1261	170.0439901	35.2994	3.5548	28.2133	32.9325	0	0	0	24.56	53.71189734	5.000619343	25.6154921	4.406241565	130.7645617	4.009609776	10.04421219	4	4	6	5	3.419144257	-3.517129554	-1.873106783	64	32	13.93610284	38.69	115	1	1	1	6	18	1	1	5	5	7	7	0	1	7	7	5	5	0
C05516	C4H5N3O2	14	127.1014	127.0381764	37.7988	3.9651	25.1758	33.0603	0	0	0	17.37	42.09267777	4.416970008	21.56867958	3.715960734	100.038021	3.526610816	8.650976417	4	3	5	4	4.809195625	-1.977599029	-1.857383752	16	16	10.78365198	29.8507	34	1	1	1	2	14	1	1	5	5	4	4	0	1	4	4	5	5	0
C05519	C4H9NO3	17	119.1192	119.0582432	40.3317	7.6154	40.2943	11.7586	0	0	0	6.71	36.91044093	4.24870856	25.32071653	3.370938777	110.5638354	5.463431384	8.421672168	4	3	5	4	5.595033514	-3.610955196	-3.60742549	16	16	10.86856056	26.4598	3	4	1	4	6	16	0	0	0	0	8	7	0	0	8	7	0	0	0
C05527	C3H4O5S	13	152.126	151.9779439	23.6857	2.6503	52.586	0	0	21.0779	0	17.73	39.08124294	4.711848826	25.42459209	3.232026662	111.1316533	5.931176204	9.217139758	5	2	8	2	NaN	-6.249035438	-0.3367	16	8	11.31493928	26.8906	15	2	1	2	4	12	0	0	0	0	9	8	0	0	9	8	0	0	0
C05528	C3H4O6S	14	168.125	167.9728586	21.4317	2.3981	57.0982	0	0	19.0721	0	39.94	42.05137922	4.739074872	25.1207221	3.403498507	119.6414751	6.095286265	9.34240261	6	2	10	2	NaN	-6.625867711	-0.73660294	8	8	12.0113907	28.3335	25	1	1	1	5	13	0	0	0	0	10	9	0	0	10	9	0	0	0
C05539	C9H13NO6	29	231.2026	231.0742872	46.7539	5.6674	41.5205	6.0582	0	0	0	17.04	65.94170059	6.342388486	37.5500641	4.496395187	201.6356048	6.362160681	11.57998718	6	3	10	3	0.838703331	-6.913447434	-0.379227084	128	64	19.91881652	50.6785	45	2	1	2	206	28	0	0	0	0	16	15	0	0	16	15	0	0	0
C05548	C8H13NO4	26	187.1931	187.0844579	51.3297	6.9998	34.188	7.4825	0	0	0	15.47	58.84371293	7.046311934	28.51806441	3.431452905	173.6431851	6.328541721	13.59258883	4	2	7	2	1.37562665	-3.349176743	-0.06916668	32	16	17.39557264	44.8486	15	1	1	1	30	25	0	0	0	0	13	12	0	0	13	12	0	0	0
C05565	C6H8N2O4	20	172.1387	172.0484068	41.864	4.6843	37.1779	16.2737	0	0	0	25.01	51.19709866	5.317491689	27.50075649	3.662066583	139.4299889	5.469080036	10.3360454	4	3	7	3	NaN	-4.331826718	-1.23460693	32	32	14.2659136	36.3304	27	2	1	2	16	20	1	1	5	5	7	7	1	0	12	12	0	0	0
C05576	C8H10O4	22	170.1626	170.0579088	56.4669	5.9234	37.6097	0	0	0	0	22.56	52.15104701	5.374589104	28.6006724	3.710524303	150.0559674	5.446150106	10.32328723	4	4	4	4	3.122500771	-0.034221544	-0.031569537	16	16	16.5125635	42.7982	14	2	1	2	1	22	1	1	6	6	6	6	0	1	6	6	6	6	1
C05577	C8H8O4	20	168.1467	168.0422587	57.1439	4.7955	38.0606	0	0	0	0	21.47	48.09649446	4.866567854	30.94424911	3.632560485	143.7382724	6.688274841	9.770697515	4	3	5	3	2.718298007	0.12735955	0.130088749	64	32	15.97463919	41.7402	28	2	1	2	3	20	1	1	6	6	6	6	0	1	6	6	6	6	1
C05578	C8H7NO2	18	149.1467	149.0476785	64.4236	4.7306	21.4546	9.3912	0	0	0	33.74	49.29137809	4.78305257	23.8578494	3.679645194	125.7216116	4.158979024	9.535392938	2	3	2	3	NaN	1.456690102	1.464877166	8	8	16.73852108	41.1063	54	1	1	1	1	19	2	2	9	10	2	2	0	2	2	2	9	10	1
C05580	C8H8O5	21	184.1461	184.0371734	52.179	4.3789	43.4421	0	0	0	0	21.39	50.83035809	5.25553496	33.04524243	3.709224072	152.2341321	6.959809658	9.776029013	5	4	6	4	NaN	-3.122523307	0.288705001	16	16	16.49472796	42.6656	42	2	1	2	3	21	1	1	6	6	7	7	0	1	7	7	6	6	1
C05581	C9H10O3	22	166.1739	166.0629942	65.0501	6.0656	28.8843	0	0	0	0	24.58	53.83164152	5.216915004	32.02408	4.194155342	152.7311054	6.013678381	9.774243012	3	1	4	1	2.519309345	0.990644911	0.991141266	16	16	17.21453371	44.8843	28	1	1	1	2	22	1	1	6	6	6	6	0	1	6	6	6	6	1
C05582	C9H10O4	23	182.1733	182.0579088	59.3371	5.5329	35.1301	0	0	0	0	24.84	56.98144848	5.464474611	33.56367734	4.119192533	161.0987396	6.065319622	10.34061889	4	2	5	2	NaN	-1.920934992	1.149757518	8	8	17.69970883	45.8097	42	1	1	1	2	23	1	1	6	6	7	7	0	1	7	7	6	6	1
C05598	C10H11NO3	25	193.1992	193.0738932	62.1674	5.7388	24.8439	7.2499	0	0	0	21.8	60.24576812	6.098532452	35.43985312	3.828036134	174.2954133	7.082583558	12.18906631	3	2	5	2	0.600074619	-2.393607495	0.505710866	16	16	19.44177711	50.1691	9	1	1	1	10	25	1	1	6	6	8	8	0	1	8	8	6	6	1
C05600	C7H8O5	20	172.1354	172.0371734	48.8423	4.6844	46.4733	0	0	0	0	19.08	54.41799411	6.644113517	23.88770642	3.220030059	144.8723497	5.796608925	13.36604049	5	3	7	3	NaN	-5.958758677	0.052467179	16	16	14.97523271	41.5173	45	4	4	1	54	19	0	0	0	0	12	11	0	0	12	11	0	0	0
C05601	C7H10O6	23	190.1507	190.0477381	44.2149	5.3007	50.4844	0	0	0	0	12.91	55.42359711	5.901421926	33.56114072	3.81776105	162.4378307	6.278362399	11.67647264	6	3	9	3	0.010789087	-6.788452592	-0.450937037	32	32	15.67843216	39.6005	15	2	1	2	50	22	0	0	0	0	13	12	0	0	13	12	0	0	0
C05604	C9H9NO4	23	195.1721	195.0531578	55.3851	4.6479	32.7903	7.1766	0	0	0	29.11	54.39514589	5.810487594	29.84772653	3.619309912	160.2016942	5.747184033	11.31848099	5	4	6	4	3.618676538	-2.525984985	-1.008326396	32	32	18.09202896	49.3531	57	2	1	2	4	24	2	2	9	10	5	5	1	1	8	9	6	6	1
C05608	C9H8O2	19	148.1586	148.0524295	72.9599	5.4425	21.5977	0	0	0	0	26.06	54.26241203	5.922996727	21.97818555	3.407891445	136.0760379	3.837931645	11.75203897	2	1	3	1	2.367552265	1.670052873	1.673904686	4	8	16.35693589	44.1154	19	2	2	1	2	19	1	1	6	6	5	5	0	1	5	5	6	6	1
C05619	C10H10O5	25	210.1834	210.0528234	57.1439	4.7955	38.0606	0	0	0	0	34.56	67.26143534	6.320650328	33.05699224	4.430799009	179.1241908	5.688257391	11.93111161	5	3	6	3	NaN	-1.848000914	1.371284351	16	16	20.00601535	53.4849	169	2	2	1	2	25	1	1	6	6	9	9	0	1	9	9	6	6	1
C05627	C8H8O	17	120.1485	120.0575149	79.9724	6.7113	13.3164	0	0	0	0	23.01	46.40928901	5.107082086	20.8444599	3.442222222	117.0631072	4.014243419	10.21374764	1	1	1	1	NaN	2.405207812	2.406382562	2	2	14.47072706	37.7252	8	1	1	1	1	17	1	1	6	6	3	3	0	1	3	3	6	6	1
C05634	C10H9NO2	22	175.184	175.0633285	68.5605	5.1782	18.2658	7.9954	0	0	0	34.58	56.39117256	4.831650026	31.4101005	4.139590892	153.2738899	6.555391271	9.700257822	2	2	3	2	NaN	1.246369763	1.247574524	16	16	19.89156584	49.5076	82	1	1	1	2	23	2	2	9	10	4	4	0	2	4	4	9	10	1
C05635	C10H9NO3	23	191.1834	191.0582432	62.8229	4.7449	25.1058	7.3263	0	0	0	32.18	58.88186753	4.998314115	32.95421067	4.383767786	161.741467	6.101188834	9.598673464	3	3	4	3	NaN	-1.307951726	1.406190777	8	8	20.32068988	50.433	123	1	1	1	2	24	2	2	9	10	5	5	0	2	5	5	9	10	1
C05640	C14H8N2O6	30	300.2231	300.038236	56.0083	2.6858	31.975	9.3309	0	0	0	50.19	90.8713457	6.493231859	31.96497353	4.874105658	231.6437947	3.721959486	12.63241186	8	3	11	4	0.316556574	-6.042618348	0.438575457	32	16	26.90853091	76.8991	4999	1	1	1	2	32	3	3	14	16	8	8	0	3	8	8	14	16	2
C05642	C13H16N2O4	35	264.2771	264.111007	59.0816	6.1023	24.2161	10.6	0	0	0	47.86	87.13687521	7.185228686	42.86412844	5.832163769	239.9539549	5.360447191	13.8708439	4	2	7	2	6.45297502	0.343963168	0.343963225	128	128	26.40767441	70.7994	240	1	1	1	12	35	1	1	6	6	13	13	0	1	13	13	6	6	1
C05643	C13H16N2O3	34	248.2777	248.1160924	62.8889	6.4956	19.3325	11.2831	0	0	0	45.47	77.82175236	6.925357589	41.04232044	5.007545257	224.7351568	6.943994022	13.78567063	3	3	4	3	4.169293834	0.841861695	0.844047466	32	32	27.22016552	68.2608	162	1	1	1	3	35	2	2	9	10	9	9	0	2	9	9	9	10	1
C05653	C8H7NO3	19	165.1461	165.0425931	58.1822	4.2723	29.0641	8.4814	0	0	0	29.84	55.52820923	4.99039139	26.71777501	4.588242586	140.7028327	4.233485244	10.03618752	3	2	5	2	NaN	-1.70824934	1.469840383	8	16	15.7487981	43.6867	48	1	1	1	2	19	1	1	6	6	6	6	0	1	6	6	6	6	1
C05659	C11H14N2O	28	190.2417	190.1106131	69.4473	7.4175	8.41	14.7252	0	0	0	39.03	64.29389268	5.525663038	33.29443371	4.50023854	180.5228223	5.981366535	10.45336312	2	2	2	3	13.59350559	-1.246562254	1.328766184	8	8	23.22503897	56.8361	41	1	1	1	1	29	2	2	9	10	5	5	0	2	5	5	9	10	1
C05662	C7H10O7	24	206.1501	206.0426527	40.7833	4.8894	54.3273	0	0	0	0	14.3	53.82601388	5.800447925	32.70581465	3.828111131	171.2862162	6.354648739	11.34394258	7	4	10	4	NaN	-9.144775535	-1.001759585	64	128	16.25254459	40.3171	27	4	1	4	32	23	0	0	0	0	14	13	0	0	14	13	0	0	0
C05665	C3H7NO	12	73.0938	73.05276385	49.2957	9.6528	21.8889	19.1626	0	0	0	3.62	28.30123244	3.931016992	17.66399369	2.634754596	76.36605638	5.394649651	7.826448039	2	1	3	2	11.93961	-3.58752927	-1.069079073	8	4	7.8588225	19.7774	2	1	1	1	2	11	0	0	0	0	5	4	0	0	5	4	0	0	0
C05668	C24H40N7O18P3S	93	839.597	839.1363377	34.3328	4.802	34.3009	11.6779	11.0674	3.8191	0	229.96	174.7131638	12.68643834	100.3989035	7.419417354	655.8396292	10.04767533	24.52097121	18	10	24	11	2.120217385	-12.36807695	-7.735104549	256	25	71.24910793	178.6096	5000	128	1	128	36	95	3	3	14	15	39	40	1	2	44	45	9	10	0
C05670	C3H6N2	11	70.0931	70.0530982	51.4061	8.628	0	39.966	0	0	0	2.36	28.52189842	4.039847393	17.38874223	2.605937121	73.81776813	5.255789687	8.05929226	2	1	2	2	NaN	-1.754250997	-0.852513954	2	4	7.624960105	19.6821	2	1	1	1	3	10	0	0	0	0	5	4	0	0	5	4	0	0	0
C05672	C3H8NO5P	18	169.0731	169.0140089	21.3116	4.7693	47.315	8.2844	18.3197	0	0	48.34	42.28739072	4.770209258	24.63663938	3.241550355	129.3200578	5.910055464	9.721723635	6	4	8	5	1.912391949	-6.953323111	-3.722366622	64	64	12.89791023	31.0815	9	2	1	2	10	17	0	0	0	0	10	9	0	0	10	9	0	0	0
C05686	C10H14N5O10PSe	41	474.18	474.96435	25.3294	2.9759	33.7412	14.7694	6.5321	0	0	130.52	96.00699212	7.801128048	53.47872681	5.268520297	311.1083628	7.894732979	15.42186867	12	5	15	6	3.950987051	-5.206613451	-5.817579457	256	13	31.66005563	91.4194	2291	32	1	32	3	43	3	3	14	15	13	14	1	2	18	19	9	10	0
C05688	C3H7NO2Se	14	168.05	168.9642003	21.4413	4.1985	19.0412	8.3348	0	0	0	3.88	37.08569828	4.471931241	23.17366731	3.149871539	108.2821151	6.040344662	8.462620684	3	2	4	3	4.851661826	-3.553217187	-3.537870502	8	8	8.909286185	33.4469	3	2	1	2	4	13	0	0	0	0	7	6	0	0	7	6	0	0	0
C05689	C4H9NO2Se	17	182.08	182.9798504	26.3855	4.9821	17.574	7.6926	0	0	0	4	41.83586368	5.000845579	25.97159996	3.229977238	125.4683718	5.297558975	9.749048019	3	2	4	3	4.936368658	-2.984621691	-2.968632529	8	8	10.5937458	38.196	3	2	1	2	4	16	0	0	0	0	8	7	0	0	8	7	0	0	0
C05691	C15H23N6O5Se	50	446.34	447.0895147	40.364	5.1939	17.9229	18.8287	0	0	0	89.94	109.2073089	7.452909681	60.43530929	6.430795097	341.4805143	7.831402855	14.82832431	10	5	11	7	10.92668098	-4.540998242	-4.540998242	256	13	35.53715782	103.594	237	32	1	32	12	52	3	3	14	15	13	14	1	2	18	19	9	10	0
C05692	C14H20N6O5Se	46	431.31	432.0660396	38.9858	4.6739	18.5474	19.4849	0	0	0	55.08	96.65292857	9.042189103	50.71782531	4.709660248	321.5156257	8.366820979	17.39668636	10	5	11	7	7.319604947	-4.783776432	-4.783776432	256	13	33.41843636	98.0449	237	32	1	32	12	48	3	3	14	15	12	13	1	2	17	18	9	10	0
C05695	C9H16N2O5Se	33	311.19	312.0224435	34.7364	5.1824	25.7068	9.002	0	0	0	17.19	72.29795981	6.3574348	49.49387404	4.834363363	234.9725839	8.247126888	12.97513289	6	4	9	5	2.147465589	-7.266855456	-3.967834241	128	128	21.5516721	66.2838	27	4	1	4	89	32	0	0	0	0	17	16	0	0	17	16	0	0	0
C05698	C4H9NO2Se	17	182.08	182.9798504	26.3855	4.9821	17.574	7.6926	0	0	0	5.94	40.79564665	4.824839742	26.66209241	3.2776127	125.2824277	6.547891743	9.719770629	3	2	4	3	5.461652917	-3.342649702	-3.341458084	8	8	10.58989515	38.1583	3	2	1	2	4	16	0	0	0	0	8	7	0	0	8	7	0	0	0
C05699	C7H14N2O4Se	28	269.16	270.0118788	31.236	5.2427	23.7768	10.4077	0	0	0	15.27	59.90877931	5.771812742	35.9133559	4.195616059	199.1281428	6.284690556	11.21187979	6	4	8	6	4.928071549	-6.391273045	-6.374074812	64	64	18.12809114	56.8903	9	4	1	4	16	27	0	0	0	0	14	13	0	0	14	13	0	0	0
C05700	C6H11NO4	22	161.1558	161.0688078	44.7171	6.8799	39.7116	8.6914	0	0	0	22.89	50.27451015	6.149192679	26.24388439	3.416608821	147.0622131	6.713406193	12.37216348	4	2	6	3	5.735543454	-3.525051272	-3.523824854	16	16	14.72515577	36.0579	9	2	1	2	4	21	0	0	0	0	11	10	0	0	11	10	0	0	0
C05701	C8H13NO6	28	219.1919	219.0742872	43.8363	5.978	43.7956	6.3902	0	0	0	26.86	64.20428303	7.359534292	32.88225559	4.01658079	191.6627347	6.786760552	14.02383334	6	3	9	4	2.711810657	-6.501251008	-3.748041624	128	64	19.05769245	46.9512	27	2	1	2	8	27	0	0	0	0	15	14	0	0	15	14	0	0	0
C05711	C9H13N3O5	30	243.2166	243.0855205	44.4445	5.3875	32.8913	17.2768	0	0	0	17.02	68.98519134	6.76829948	36.64907803	4.603858035	211.2036892	6.642226739	13.1034183	7	4	10	5	2.276922274	-7.732901919	-4.562279533	128	256	21.19493278	53.5998	54	4	1	4	606	29	0	0	0	0	17	16	0	0	17	16	0	0	0
C05730	C17H34N6O5S	63	434.554	434.2311389	46.9865	7.8862	18.409	19.3394	0	7.3788	0	37.73	123.9083841	11.45749315	69.84779613	6.11851383	406.7972713	9.443841754	22.77545184	8	8	12	10	9.943093286	-11.88061057	-7.96686091	256	14	43.91997631	110.8834	81	4	1	4	1885	62	0	0	0	0	29	28	0	0	29	28	0	0	0
C05766	C40H44N4O16	104	836.7946	836.2752314	57.4129	5.2999	30.5918	6.6954	0	0	0	208.49	156.6054142	8.837980241	126.4563552	8.602790365	709.0757115	15.84352809	14.51402218	16	12	24	12	NaN	-20.33535932	1.388546819	256	13	77.66707141	206.9264	1872	1	1	1	70	108	5	5	24	28	36	36	1	4	40	44	20	20	0
C05768	C36H44N4O8	92	660.7566	660.3159144	65.4379	6.7119	19.371	8.4792	0	0	0	197.35	145.3063249	8.493843031	117.1346452	8.139680105	600.8219453	12.40132382	14.28225496	8	8	12	8	NaN	-5.145789395	4.891239219	256	9	67.5332419	181.8608	1463	1	1	1	6	96	5	5	24	28	24	24	1	4	28	32	20	20	0
C05773	C45H59CoN4O14	123	938.9016	938.3359778	57.5653	6.3338	23.8568	5.9673	0	0	0	251.94	164.8438122	9.900009405	130.3487153	7.824808401	828.3375402	16.07911235	18.26605687	18	7	25	7	3.68799606	-16.39742428	0.859137627	256	14	89.27085473	224.8451	5000	512	1	512	1280	127	5	5	23	27	41	41	5	0	64	68	0	0	0
C05778	C42H46N4O16	108	862.8318	862.2908814	58.4644	5.3736	29.6686	6.4934	0	0	0	163.71	215.9210575	9.92289727	108.6642986	8.66341686	742.135786	11.10356283	19.20900364	18	10	26	10	2.834874482	-19.80948367	3.116881802	256	13	83.49651516	209.3843	5000	16	1	16	1024	112	5	5	24	28	38	38	2	3	42	44	20	22	0
C05787	C45H52N4O18	119	936.9104	936.3276609	57.6876	5.5942	30.7382	5.98	0	0	0	249.5	195.6698835	10.04594478	131.0041598	9.054556858	798.0168014	15.84417658	16.23754407	16	12	22	12	0.230702454	-7.408746181	-0.776480658	256	25	89.50120598	233.4932	5000	4096	4	1024	36	124	6	6	32	32	35	40	4	2	57	62	10	10	0
C05791	C33H42N4O6	85	590.7098	590.3104351	67.0978	7.1665	16.251	9.4847	0	0	0	113.31	161.8222444	10.80870791	87.50142746	7.606701641	544.6082393	10.39214352	21.27116148	6	6	10	6	3.057447068	-1.70862763	3.464804713	256	11	62.42103606	166.0859	3947	4	1	4	192	88	4	4	20	20	23	26	2	2	33	36	10	10	0
C05802	C37H56O2	95	532.8393	532.428031	83.4015	10.5932	6.0053	0	0	0	0	163.15	165.5672847	14.60525824	82.70880828	6.317989969	581.7699098	11.11134249	28.49407507	2	1	2	1	2.455505202	11.53844608	11.5391476	4	4	67.42129067	177.7579	14	32	32	1	1	95	1	1	6	6	33	33	0	1	33	33	6	6	1
C05803	C37H54O3	94	546.8229	546.4072956	81.2687	9.9536	8.7776	0	0	0	0	134.53	161.6625357	14.91897398	78.79116074	5.911297946	580.6016832	11.06382314	29.72151176	3	0	5	0	NaN	10.52755099	10.52755099	4	16	67.15276032	180.3191	20	32	32	1	7	94	1	1	6	6	34	34	1	0	40	40	0	0	1
C05804	C38H56O3	97	560.8494	560.4229457	81.3777	10.0641	8.5581	0	0	0	0	144.77	162.2966587	14.45236717	91.23772532	6.3362325	597.4386089	9.429140817	28.58604	3	0	5	0	NaN	10.92310148	10.92310148	4	8	68.99937792	184.6762	20	32	32	1	9	97	1	1	6	6	35	35	1	0	41	41	0	0	1
C05809	C47H70O3	120	683.0569	682.5324961	82.6436	10.3294	7.027	0	0	0	0	172.27	234.5356955	44.96338213	130.3953638	45.57576712	768.4323293	82.23476131	89.82548636	3	2	4	2	NaN	12.07353817	14.67383033	4	4	85.15569307	226.1561	23	128	128	1	1	120	1	1	6	6	44	44	0	1	44	44	6	6	1
C05810	C46H70O	117	639.0474	638.5426669	86.4556	11.0408	2.5036	0	0	0	0	178.8	202.7932302	18.72227138	93.19705028	6.373507621	708.7723979	11.643991	36.58966283	1	1	1	1	NaN	15.01424905	15.01624742	2	2	82.97188418	218.8999	7	128	128	1	1	117	1	1	6	6	41	41	0	1	41	41	6	6	1
C05811	C46H70O2	118	655.0468	654.5375815	84.3439	10.7711	4.885	0	0	0	0	181.99	212.1434977	19.36766135	105.0875062	6.647903083	718.563489	9.785015231	38.56785859	2	2	2	2	NaN	14.71000708	14.7126821	4	4	83.50760137	220.8808	14	128	128	1	1	118	1	1	6	6	42	42	0	1	42	42	6	6	1
C05812	C47H72O2	121	669.0734	668.5532315	84.3708	10.8466	4.7826	0	0	0	0	165.23	215.4206811	19.13398661	93.20896406	6.957092511	734.908622	11.17528178	38.22580342	2	1	2	1	2.455505202	14.85787463	14.85857615	4	4	85.43061824	225.3631	14	128	128	1	1	121	1	1	6	6	43	43	0	1	43	43	6	6	1
C05813	C47H70O3	120	683.0569	682.5324961	82.6436	10.3294	7.027	0	0	0	0	172.11	205.9424512	18.20400939	99.95749759	6.554080936	734.8860019	15.61481685	36.81203024	3	0	5	0	NaN	13.84697954	13.84697954	4	16	85.15450026	227.9243	20	128	128	1	7	120	1	1	6	6	44	44	1	0	50	50	0	0	1
C05814	C48H72O3	123	697.0835	696.5481462	82.7037	10.4108	6.8856	0	0	0	0	193.26	211.7634513	18.45672509	107.1498372	7.307521942	752.542385	11.17261969	36.59674047	3	0	5	0	NaN	14.24253003	14.24253003	4	8	87.00137604	232.2814	20	128	128	1	9	123	1	1	6	6	45	45	1	0	51	51	0	0	1
C05815	C48H72O4	124	713.0829	712.5430608	80.848	10.1772	8.9748	0	0	0	0	211.14	214.8769741	19.38741859	114.3163919	6.921776312	761.4951523	14.51025984	37.51763263	4	1	6	1	2.742988253	13.70318847	13.72387235	4	4	87.57315918	234.2488	33	128	128	1	68	124	1	1	6	6	46	46	1	0	52	52	0	0	1
C05818	C20H22O2	44	294.3875	294.1619799	81.5979	7.5325	10.8696	0	0	0	0	67.84	87.87186102	7.541545977	54.28076391	5.021355965	289.8252278	8.477034501	15.02675848	2	0	4	0	NaN	4.764727021	4.764728325	8	4	34.79368687	93.5445	59	2	2	1	7	45	2	2	10	11	12	12	1	1	16	17	6	6	2
C05824	C3H7NO5S2	18	201.221	200.9765637	17.9067	3.5064	39.7558	6.9609	0	31.8704	0	43.78	51.95922024	5.813277514	28.65273699	3.518371712	148.3915145	5.460311455	11.59940147	6	3	9	4	NaN	-6.082503061	-2.682757641	16	16	16.39106563	38.6421	24	2	1	2	4	17	0	0	0	0	11	10	0	0	11	10	0	0	0
C05827	C6H8N2O	17	124.1405	124.0636629	58.0505	6.4955	12.8881	22.5659	0	0	0	21.19	41.54783072	4.694230015	24.87528399	3.114568001	114.9676405	5.802201389	9.191862786	2	0	3	0	9.807843004	-0.124525638	-0.056565779	8	8	12.67123804	33.9197	16	1	1	1	1	17	1	1	5	5	4	4	0	1	4	4	5	5	0
C05828	C6H8N2O2	18	140.1399	140.0585775	51.423	5.7539	22.8335	19.9896	0	0	0	20.99	43.90313687	5.271231837	24.74573988	3.277212946	123.4218952	5.822148668	10.43587655	3	1	4	1	5.061851416	-2.147193192	-1.475797306	4	4	13.1702584	34.8451	24	1	1	1	1	18	1	1	5	5	5	5	0	1	5	5	5	5	0
C05830	C11H9NO4	25	219.1935	219.0531578	60.2745	4.1386	29.1969	6.3901	0	0	0	34.43	68.67364756	5.829635779	34.15968327	4.748260688	183.1493211	5.067535239	10.2815041	5	2	6	2	2.149734236	-1.398851132	1.713097118	16	16	22.41329077	55.3076	292	1	1	1	2	26	2	2	10	11	6	6	0	2	6	6	10	11	1
C05831	C8H9NO3	21	167.162	167.0582432	57.4805	5.4267	28.7136	8.3791	0	0	0	26.65	55.57139552	5.428961661	29.3014489	4.034130253	146.9819583	4.82547169	10.07518017	4	2	5	3	2.973307013	-1.219124525	1.294231504	8	8	16.35755307	44.4778	50	1	1	1	1	21	1	1	6	6	6	6	0	1	6	6	6	6	1
C05839	C15H18O8	41	326.2986	326.1001676	55.2134	5.5602	39.2264	0	0	0	0	61.52	91.18746999	6.839520937	52.84400492	5.171778126	279.8503633	7.5878301	13.82730588	8	5	9	5	0.180266974	-3.777639829	-0.435547155	128	13	30.5477473	77.1852	41	64	2	32	2	42	2	2	12	12	11	12	1	1	17	18	6	6	1
C05841	C11H14NO6	32	256.232	256.0821122	51.5617	5.5072	37.4646	5.4664	0	0	0	38.73	73.51703173	5.660799462	42.30586823	4.922845333	216.7435224	6.227113916	10.50290503	6	4	7	4	7.235907461	-5.924894065	-5.31383927	128	13	23.22936879	59.0123	15	16	1	16	1	33	2	2	11	11	7	8	1	1	12	13	6	6	0
C05844	C7H14N2O6S	30	254.261	254.0572569	33.0664	5.5499	37.7551	11.0176	0	12.6111	0	49.38	71.62476282	7.059344251	36.80121749	4.338003525	211.259873	7.407282327	13.99101163	7	4	11	5	0.467692699	-7.272342211	-5.453508695	64	128	21.82733376	52.6929	45	2	1	2	316	29	0	0	0	0	16	15	0	0	16	15	0	0	0
C05849	C31H46O3	80	466.6951	466.3446953	79.7805	9.9348	10.2847	0	0	0	0	218.23	140.2870655	10.336594	81.77868584	6.375030575	490.6845974	9.541830372	20.43451599	3	0	5	0	NaN	9.222648347	9.222648347	8	2	55.49160277	141.6885	31	32	2	16	1	82	3	3	11	13	23	23	2	1	28	30	6	6	2
C05852	C8H8O3	19	152.1473	152.0473441	63.153	5.2998	31.5472	0	0	0	0	18.55	46.29660792	4.784358628	29.91664346	3.650960292	135.0921916	6.675522886	9.388563375	3	2	4	2	NaN	-1.581819383	1.307428784	4	4	15.15005316	39.3465	21	1	1	1	2	19	1	1	6	6	5	5	0	1	5	5	6	6	1
C05859	C25H44O7P2	78	518.5602	518.2562268	57.9041	8.5524	21.5975	0	11.9461	0	0	165.49	142.1918811	10.16656641	72.19029725	5.817138711	496.0462963	10.18638469	20.30174449	5	3	7	3	NaN	2.054899281	6.936161611	8	8	54.85761463	144.3357	17	32	16	2	1	77	0	0	0	0	34	33	0	0	34	33	0	0	0
C05860	C47H82N2O22P2	155	1089.1017	1088.483445	51.832	7.5889	32.319	2.5722	5.6879	0	0	307.87	222.4201805	14.10459576	136.3416283	7.955748022	989.3768023	15.08245945	28.39196793	19	12	23	12	0.661134664	-3.70568027	1.032090527	256	26	105.0264993	262.8133	198	ERROR	ERROR	ERROR	9	157	3	3	18	18	55	57	3	0	73	75	0	0	0
C05901	C14H12O4	30	244.2427	244.0735589	68.8454	4.9522	26.2025	0	0	0	0	50.21	80.52225911	7.250033934	28.64630587	4.322092242	213.1165511	5.485295159	14.4936241	4	4	4	4	NaN	3.093480931	3.098825565	16	16	25.92682195	69.4364	605	2	2	1	1	31	2	2	12	12	6	7	0	2	6	7	12	12	2
C05921	C20H28N7O9PS	66	573.517	573.1406827	41.8844	4.9209	25.1073	17.0957	5.4007	5.5909	0	159.89	133.5959406	10.84655351	78.00621341	6.168324231	455.8208366	12.75573578	20.48576705	11	6	14	7	3.937995492	-3.910091688	-4.577962205	256	16	51.75012362	130.6272	3683	256	1	256	9	70	5	5	22	24	16	18	3	2	29	32	9	10	0
C05925	C9H14N5O7P	36	335.2105	335.0630843	32.2473	4.2096	33.4106	20.8924	9.2401	0	0	76.93	77.41061727	6.530443239	45.18692433	4.793212654	252.968975	8.162330427	12.68980467	10	7	12	8	2.470061719	-6.100976831	-5.125250148	256	16	27.23215457	80.7299	328	4	1	4	47	37	2	2	10	11	12	12	1	1	16	17	6	6	0
C05936	C6H11NO2	20	129.157	129.0789786	55.7958	8.5844	24.7751	10.8447	0	0	0	9.95	46.49842911	5.832118929	23.54102848	3.118501841	129.0384452	5.006749959	11.48029834	2	1	4	1	7.00848038	-0.961571284	-0.961571265	16	16	13.09480251	33.9762	6	1	1	1	6	19	0	0	0	0	9	8	0	0	9	8	0	0	0
C05946	C5H6O6	17	162.0975	162.0164379	37.0478	3.7309	59.2214	0	0	0	0	8.51	44.8415164	5.460144502	25.26269353	3.230611602	128.4751449	5.394986256	10.83821499	6	3	9	3	NaN	-7.629496611	-0.82442176	64	32	12.12048171	30.2212	15	2	1	2	10	16	0	0	0	0	11	10	0	0	11	10	0	0	0
C05947	C5H9NO5	20	163.1287	163.0480724	36.8136	5.5609	49.0392	8.5863	0	0	0	8.84	44.00281024	4.890191528	30.51640886	3.55494058	138.314249	6.990708093	9.745120825	6	4	8	5	2.403361341	-7.430712338	-4.382973772	64	64	13.41183074	32.7363	9	4	1	4	20	19	0	0	0	0	11	10	0	0	11	10	0	0	0
C05951	C25H40N2O6S	74	496.66	496.2607077	60.4574	8.1177	19.3284	5.6404	0	6.4561	0	80.29	148.0996899	11.61322069	78.56732387	7.381386414	480.6523421	8.775472863	23.17815126	7	5	10	6	4.021540441	-2.237150754	0.284711452	128	10	53.26896098	140.4232	27	128	16	8	60	73	0	0	0	0	34	33	0	0	34	33	0	0	0
C05952	C23H37NO5S	67	439.609	439.239244	62.839	8.4834	18.1973	3.1862	0	7.294	0	62.06	131.0112841	11.7190741	63.52746027	6.896406736	432.3024152	10.68915624	23.91426974	6	4	8	5	3.423509883	-0.53518237	1.887413953	32	64	48.35945532	127.6197	9	128	16	8	12	66	0	0	0	0	30	29	0	0	30	29	0	0	0
C05966	C20H32O4	56	336.4657	336.2300595	71.3933	9.5861	19.0205	0	0	0	0	51.87	106.4011872	9.71997179	57.68867189	5.422448892	348.8763557	9.247732583	19.12994558	4	2	5	2	0.295825802	3.641611143	5.805695121	8	8	38.42090435	102.8197	3	32	16	2	2	55	0	0	0	0	24	23	0	0	24	23	0	0	0
C05985	C3H2O	6	54.0474	54.01056469	66.6676	3.7298	29.6025	0	0	0	0	-0.07	21.74566221	3.448258656	10.78241601	2.302204489	51.92170782	3.4	6.895254911	1	0	2	0	NaN	0.023353481	0.023353481	4	4	5.242766286	14.8586	3	1	1	1	1	5	0	0	0	0	4	3	0	0	4	3	0	0	0
C05993	C12H16N5O8P	42	389.2579	389.073649	37.0265	4.143	32.8819	17.9915	7.9571	0	0	96.5	94.51392151	7.590705721	53.23453555	4.997413593	297.5435812	9.513924669	15.18644492	10	4	12	5	3.938031254	-4.45285991	-5.120263784	256	14	33.10301782	83.22	948	32	1	32	3	44	3	3	14	15	12	13	1	2	17	18	9	10	0
C05999	C3H6O2	11	74.0785	74.03677944	48.6404	8.1638	43.1958	0	0	0	0	3.57	27.43917374	3.461433599	20.27434351	2.942329417	73.06947832	5.393662091	6.812863573	2	1	3	1	5.395055071	-0.630445814	-0.63044577	8	4	6.9989956	17.9144	2	2	1	2	4	10	0	0	0	0	5	4	0	0	5	4	0	0	0
C06002	C4H6O3	13	102.0886	102.0316941	47.0599	5.9239	47.0162	0	0	0	0	21.67	32.34266381	3.8711063	23.94492168	3.188256169	92.31311385	5.211933777	7.093752316	3	1	5	1	NaN	-2.84715154	0.053252758	8	8	8.816896296	22.6369	6	2	1	2	3	12	0	0	0	0	7	6	0	0	7	6	0	0	0
C06006	C6H10O4	20	146.1412	146.0579088	49.3114	6.897	43.7916	0	0	0	0	12.46	40.89107482	4.604224016	32.35688653	3.787751658	134.93415	7.167862849	8.86942653	4	2	6	2	NaN	-2.918878467	0.238638075	16	8	13.13477005	33.1144	6	2	1	2	2	19	0	0	0	0	10	9	0	0	10	9	0	0	0
C06007	C6H12O4	22	148.1571	148.0735589	48.6404	8.1638	43.1958	0	0	0	0	16.18	46.73674369	4.547821226	29.8666618	3.691658326	141.5099228	5.842807305	9.105886081	4	3	5	3	0.317765034	-3.239598163	-0.299065397	16	16	13.6653512	33.9645	3	4	1	4	3	21	0	0	0	0	10	9	0	0	10	9	0	0	0
C06010	C5H8O4	17	132.1146	132.0422587	45.4556	6.1034	48.441	0	0	0	0	9.55	35.71519505	4.002972413	30.21790348	3.600039936	117.8768687	6.886642022	7.483006095	4	2	6	2	NaN	-3.522886905	-0.28388432	16	8	11.33158423	28.5904	6	2	1	2	2	16	0	0	0	0	9	8	0	0	9	8	0	0	0
C06017	C16H24N2O17P2	61	578.3125	578.0550204	33.2296	4.183	47.0316	4.844	10.7118	0	0	156.95	111.8618898	8.203943556	69.17415173	5.411702895	433.1271673	9.389117259	16.43538584	14	8	19	8	NaN	-11.42898295	-3.380144988	256	18	45.36518533	109.1696	1056	1024	1	1024	6	63	3	3	17	17	20	22	2	1	31	33	6	6	0
C06022	C29H51N3O18P2	103	791.6721	791.2642849	43.9968	6.4932	36.3773	5.3078	7.8249	0	0	194.99	171.8941499	12.36711532	91.29615177	6.799243071	675.3619811	10.80027861	24.69006465	15	9	20	10	2.32323203	-2.292387194	-1.89265922	256	24	71.18540024	174.0182	1056	4096	1	4096	3	105	3	3	17	17	35	37	2	1	46	48	6	6	0
C06032	C5H8O5	18	148.114	148.0371734	40.5455	5.4441	54.0104	0	0	0	0	9.74	40.36518449	4.255109586	30.96783118	3.705041809	126.5035629	6.238955815	8.241274321	5	3	7	3	NaN	-5.580461588	-0.57065515	32	32	11.89814482	29.4497	9	4	1	4	12	17	0	0	0	0	10	9	0	0	10	9	0	0	0
C06044	C8H10O2	20	138.1638	138.0680796	69.5447	7.2953	23.16	0	0	0	0	19.34	47.31063705	5.457064335	25.37405484	3.471525219	132.8166392	5.323282045	10.79743957	2	2	2	2	3.911435325	1.190722047	1.190991932	4	4	15.15272246	39.6098	5	1	1	1	1	20	1	1	6	6	4	4	0	1	4	4	6	6	1
C06046	C14H20O7	41	300.3044	300.120903	55.9931	6.7128	37.2941	0	0	0	0	42.61	82.73036989	7.287546213	40.83826793	4.545871862	268.1383042	6.654605076	14.24881154	7	5	7	5	3.678302905	-0.580117374	-0.579843714	128	256	28.86075645	72.0231	5	32	1	32	1	42	2	2	12	12	9	10	1	1	15	16	6	6	1
C06054	C4H7O8P	20	214.0673	213.9878537	22.4428	3.296	59.792	0	14.4692	0	0	50.4	46.37538417	4.966788166	34.08937516	3.8277833	154.2316729	7.734698844	8.996032771	7	4	10	4	NaN	-7.793514278	-1.353085848	32	32	14.95557818	36.6024	20	2	1	2	8	19	0	0	0	0	13	12	0	0	13	12	0	0	0
C06055	C4H10NO7P	23	215.0985	215.0194882	22.3353	4.6859	52.0672	6.5118	14.3998	0	0	51.06	52.72376926	5.537028278	29.03343679	3.593318468	164.1711869	6.194223164	10.88412345	7	5	9	6	2.023214099	-7.635345646	-4.400624406	64	64	16.21386604	38.8764	12	4	1	4	6	22	0	0	0	0	13	12	0	0	13	12	0	0	0
C06056	C4H9NO4	18	135.1186	135.0531578	35.556	6.7137	47.364	10.3662	0	0	0	7.26	40.28883444	4.627763039	25.14973632	3.102613176	119.2085876	6.157036376	9.210779237	5	4	6	5	5.276039382	-4.66295221	-4.653879666	32	32	11.57927606	28.0035	3	4	1	4	7	17	0	0	0	0	9	8	0	0	9	8	0	0	0
C06057	C3H9NO2	15	91.1091	91.06332854	39.5483	9.9567	35.1214	15.3735	0	0	0	3.97	33.63151397	4.417033092	20.08713244	2.996163881	91.29549465	4.994487221	8.855945861	3	3	3	4	11.60113066	-4.107089098	-1.945895819	8	8	9.06187592	22.1736	1	2	1	2	1	14	0	0	0	0	6	5	0	0	6	5	0	0	0
C06075	C10H16	26	136.234	136.1252005	88.1623	11.8377	0	0	0	0	0	40.67	52.18145943	5.1922294	28.226792	3.445787379	154.444554	5.820524594	10.3339578	0	0	0	0	NaN	3.118221157	3.118221157	1	1	18.01315789	47.2862	1	1	1	1	1	26	1	1	6	6	4	4	1	0	10	10	0	0	1
C06098	C40H56O2	98	568.8714	568.428031	84.4528	9.9222	5.625	0	0	0	0	184.79	186.5296417	15.97356606	78.91100568	6.687824884	602.0808266	10.09736552	31.21733189	2	2	2	2	8.918437132	8.35064404	8.350644046	4	4	71.71593928	194.9508	1	1056	272	3	1	99	2	2	12	12	30	31	2	0	42	43	0	0	2
C06099	C10H16	26	136.234	136.1252005	88.1623	11.8377	0	0	0	0	0	33.84	46.68913003	5.071637075	32.33816324	3.704276075	154.8118924	6.378262754	9.921851605	0	0	0	0	NaN	3.219812652	3.219812652	1	1	18.01315789	46.4803	1	2	1	2	1	26	1	1	6	6	4	4	1	0	10	10	0	0	1
C06102	C6H10O3	19	130.1418	130.0629942	55.3736	7.7449	36.8815	0	0	0	0	8.75	45.44267112	5.810579025	22.11141482	2.97309927	126.1732024	6.360393204	11.49392961	3	1	5	1	NaN	-2.152673596	0.33203811	8	16	12.43888663	31.8136	6	1	1	1	4	18	0	0	0	0	9	8	0	0	9	8	0	0	0
C06104	C6H10O4	20	146.1412	146.0579088	49.3114	6.897	43.7916	0	0	0	0	8.98	49.76933625	6.149388232	22.72504999	2.970867876	134.5056906	6.0858941	12.08736045	4	2	6	2	NaN	-4.756802701	0.490654363	4	16	12.97113928	32.739	6	1	1	1	3	19	0	0	0	0	10	9	0	0	10	9	0	0	0
C06105	C6H8O2	16	112.1265	112.0524295	64.2704	7.1914	28.5381	0	0	0	0	13.6	38.00358358	3.941468521	26.35710113	3.794062809	106.1079398	5.238041539	7.009685106	2	0	4	0	NaN	1.332845267	1.332845267	16	4	11.22510507	28.9924	2	1	1	1	10	16	1	1	6	6	2	2	1	0	8	8	0	0	1
C06111	C15H28O7P2	52	382.3261	382.1310263	47.1222	7.3817	29.2933	0	16.2028	0	0	139.92	98.65683845	7.587005542	58.73868431	5.576603721	342.1183189	6.957763822	14.79786166	5	3	7	3	NaN	-1.120450488	3.761842217	8	8	37.04837302	95.755	17	8	2	4	1	51	0	0	0	0	24	23	0	0	24	23	0	0	0
C06123	C16H30O	47	238.4088	238.2296656	80.6057	12.6833	6.7109	0	0	0	0	29.04	96.25822183	11.28797514	37.75820839	3.669035924	277.562304	5.527754578	22.47689143	1	0	2	0	NaN	6.095790015	6.095790015	2	4	30.07625564	77.2515	3	2	2	1	4	46	0	0	0	0	17	16	0	0	17	16	0	0	0
C06124	C18H38NO5P	63	379.4718	379.2487598	56.972	10.0934	21.0811	3.6911	8.1623	0	0	93.78	123.6357102	11.54743046	51.71970075	5.585643743	384.2677811	8.657175969	23.05644909	5	4	6	5	3.718593133	3.213222895	3.098782352	16	16	40.66223633	102.7649	4	8	2	4	1	62	0	0	0	0	25	24	0	0	25	24	0	0	0
C06142	C4H10O	15	74.1216	74.07316494	64.8162	13.5985	21.5853	0	0	0	0	4.81	32.75053027	4.515590532	19.00755792	2.704687745	87.73516775	5.096272093	8.826067875	1	1	1	1	7.504171969	0.805321946	0.805321946	2	2	8.715081524	22.1349	1	1	1	1	1	14	0	0	0	0	5	4	0	0	5	4	0	0	0
C06174	C18H21NO3	43	299.3642	299.1521435	72.2173	7.0706	16.0334	4.6788	0	0	0	82.83	73.69410414	6.445867033	52.07293553	4.723414471	273.0611869	8.959296242	12.82323146	4	1	4	1	11.4898808	-0.831790179	1.342951283	16	16	32.61005661	84.6047	14	32	1	32	1	47	5	5	18	22	4	4	4	1	16	20	6	6	3
C06189	C3H6O9P2	20	248.0219	247.9487048	14.5278	2.4383	58.0572	0	24.9766	0	0	99.95	48.99485687	5.260333504	33.34496511	3.992516535	160.661741	7.364942119	10.48737928	6	3	9	3	NaN	-9.120503016	-1.167566204	16	16	16.60144203	38.3503	66	8	1	8	2	20	1	1	7	7	7	7	1	0	14	14	0	0	0
C06195	C3H4N2O	10	84.0767	84.03236276	42.8562	4.7953	19.0295	33.3189	0	0	0	10.06	27.70209178	3.515935237	18.300018	2.854870479	69.19545102	4.201389272	6.814901806	3	1	4	1	7.920328183	-2.515989783	-1.493715451	16	8	7.534801455	19.736	8	1	1	1	5	10	1	1	5	5	1	1	1	0	6	6	0	0	0
C06199	C10H15NO	27	165.2322	165.1153641	72.6898	9.1502	9.683	8.477	0	0	0	30.86	58.98741037	6.164104246	31.91333695	3.583968234	171.7018355	6.608915929	12.44335999	2	1	2	1	9.719426054	-0.324942244	1.627192077	4	4	19.761399	51.3366	5	1	1	1	1	27	1	1	6	6	6	6	0	1	6	6	6	6	1
C06201	C7H10O6	23	190.1507	190.0477381	44.2149	5.3007	50.4844	0	0	0	0	17.2	57.34733812	6.134168774	30.23745545	3.717527712	161.1767706	6.605262199	12.34433702	6	4	8	4	0.141719513	-6.904182902	-0.816422231	16	32	15.94564624	41.9162	21	4	2	2	50	22	0	0	0	0	13	12	0	0	13	12	0	0	0
C06202	C7H6O2	15	122.1213	122.0367794	68.8454	4.9522	26.2025	0	0	0	0	18.46	43.59824082	4.371830211	21.37611838	3.617817629	109.7620508	3.927006717	8.541187728	2	1	3	1	NaN	2.015475446	2.032182839	4	2	12.82794555	34.6229	17	1	1	1	1	15	1	1	6	6	3	3	0	1	3	3	6	6	1
C06203	C10H8O4	22	192.1681	192.0422587	62.501	4.1961	33.3029	0	0	0	0	42.24	64.56022028	6.267825451	26.00874238	3.939965092	163.9116012	4.184150566	12.28723067	4	2	6	2	NaN	-1.30426547	2.121740606	4	8	18.75680414	50.3868	144	2	2	1	5	22	1	1	6	6	8	8	0	1	8	8	6	6	1
C06204	C10H8O4	22	192.1681	192.0422587	62.501	4.1961	33.3029	0	0	0	0	31.09	53.90446768	5.658449557	31.19023815	3.837301482	159.4547467	6.966657052	11.35128276	4	2	5	2	NaN	-1.607656861	1.829162297	8	4	18.6502728	48.7667	36	2	1	2	1	23	2	2	10	11	4	4	1	1	8	9	6	6	1
C06210	C7H8O4	19	156.136	156.0422587	53.8472	5.1644	40.9884	0	0	0	0	28.27	53.20609681	5.95969723	20.86989226	3.368018864	136.3440319	4.017049378	11.91947093	4	2	6	2	NaN	-2.815087985	0.297269183	16	8	14.44128956	40.4441	30	4	4	1	41	18	0	0	0	0	11	10	0	0	11	10	0	0	0
C06224	C8H8O2	18	136.1479	136.0524295	70.5744	5.9226	23.503	0	0	0	0	25.11	48.96618903	5.109810302	24.40679668	3.807792792	125.5410178	3.880511214	9.583661963	2	2	2	2	NaN	2.100681646	2.102817241	4	4	15.04901551	39.7061	28	1	1	1	1	18	1	1	6	6	4	4	0	1	4	4	6	6	1
C06244	C2H5NO	9	59.0672	59.03711379	40.6679	8.5321	27.0868	23.7132	0	0	0	4.22	24.16468147	3.218216869	16.45299171	2.969265431	58.4223873	4.092000716	5.608484273	1	1	2	2	7.733530635	-1.03028833	-1.030288328	4	4	5.658248	14.4659	3	1	1	1	3	8	0	0	0	0	4	3	0	0	4	3	0	0	0
C06314	C20H32O5	57	352.4651	352.2249741	68.1526	9.151	22.6964	0	0	0	0	50.27	109.9072959	9.92996494	68.99259573	5.532306943	357.0514933	9.125785538	19.31234279	5	4	6	4	1.465473713	0.565646303	3.05064507	16	32	38.97005208	104.3465	3	128	16	8	2	56	0	0	0	0	25	24	0	0	25	24	0	0	0
C06315	C20H32O5	57	352.4651	352.2249741	68.1526	9.151	22.6964	0	0	0	0	50.42	113.9031028	10.23627024	69.52993478	5.723451172	356.9403135	10.17870335	20.78057025	5	4	6	4	1.551460035	0.72311615	3.05064507	16	32	38.97005208	104.3465	3	128	16	8	2	56	0	0	0	0	25	24	0	0	25	24	0	0	0
C06316	C5H6O5	16	146.0981	146.0215233	41.1049	4.1394	54.7557	0	0	0	0	25.06	40.66742581	4.570319745	28.00971895	3.660922143	113.3031836	5.421428801	8.808136474	4	3	5	3	1.318116546	-3.809181296	-1.283223934	32	16	11.86106021	31.0696	10	2	1	2	4	16	1	1	5	5	5	5	1	0	10	10	0	0	0
C06329	C6H5ClO5	17	192.554	191.982551	37.4254	2.6173	41.5452	0	0	0	18.412	29.76	48.64326191	5.149569126	28.04871459	3.534414809	143.062603	5.97070874	9.685232494	5	2	8	2	NaN	-6.130750495	0.569891954	16	16	14.88363168	39.2935	27	2	2	1	6	16	0	0	0	0	12	11	0	0	12	11	0	0	0
C06335	C6H7NO3S	18	173.19	173.0146638	41.6099	4.0739	27.7142	8.0875	0	18.5143	0	50.78	51.51462111	5.348928095	25.52995344	3.590912656	137.5469829	5.64415803	10.19148474	4	2	6	3	NaN	-2.04976127	-0.444355122	4	4	16.12064573	41.3809	38	1	1	1	1	18	1	1	6	6	5	5	0	1	5	5	6	6	1
C06369	C6H13O8P	28	244.1364	244.0348039	29.518	5.3672	52.4277	0	12.6871	0	0	58.54	63.39115318	5.884048478	37.06342912	4.591558439	190.5738216	6.888298377	11.5948833	7	5	8	5	NaN	-5.343152449	-2.155467186	64	64	19.0529645	45.2856	4	16	1	16	1	28	1	1	6	6	9	9	1	0	15	15	0	0	0
C06377	C6H14NO8P	30	259.151	259.0457029	27.8078	5.4451	49.3902	5.4048	11.952	0	0	59.64	64.93424936	6.039909908	36.94448137	4.150347925	202.5998589	5.627473332	11.6196096	8	6	9	7	3.573522568	-5.756174269	-5.476681145	128	128	20.56254356	48.4538	4	32	1	32	1	30	1	1	6	6	10	10	1	0	16	16	0	0	0
C06397	C17H27N5O16P2	67	619.3677	619.0928029	32.9662	4.3939	41.3309	11.3073	10.0017	0	0	174.72	128.9029587	10.1380691	64.45192985	5.409946118	466.8072341	9.777465108	19.89645647	17	10	19	11	2.893830484	-10.04585075	-8.284869069	256	23	50.33719964	123.0483	1738	4096	1	4096	3	70	4	4	20	21	20	22	2	2	31	33	9	10	0
C06426	C18H30O2	50	278.4296	278.2245802	77.6471	10.8603	11.4926	0	0	0	0	43.05	96.36738466	9.084856929	54.20153306	5.086565005	304.6215217	8.545447373	18.3850282	2	1	3	1	NaN	3.993905165	6.059955138	2	4	33.69226639	89.6354	3	8	8	1	2	49	0	0	0	0	20	19	0	0	20	19	0	0	0
C06427	C18H30O2	50	278.4296	278.2245802	77.6471	10.8603	11.4926	0	0	0	0	43.2	98.76961561	10.900142	43.95375938	4.447594371	304.7601229	7.539911259	21.58284251	2	1	3	1	NaN	4.056907494	6.059955138	2	4	33.69226639	89.6354	3	8	8	1	2	49	0	0	0	0	20	19	0	0	20	19	0	0	0
C06462	C28H44N2O8S	83	568.723	568.2818371	59.1324	7.7981	22.5057	4.9257	0	5.6381	0	101.57	155.8665802	12.18275548	101.9594433	8.189768348	543.4538013	12.30040222	24.39325853	9	6	13	7	2.671243461	-4.360351081	1.000650539	256	10	59.34599644	155.7075	81	256	16	16	403	82	0	0	0	0	39	38	0	0	39	38	0	0	0
C06504	C45H61CoN6O12	125	936.932	936.3679466	57.6863	6.5623	20.4916	8.9697	0	0	0	255.07	165.3711542	9.786183915	133.2117411	7.841423885	833.3980569	13.71076122	18.20672177	16	7	23	9	4.167594673	-12.4828585	-2.552646354	256	16	90.57888384	228.4895	5000	512	1	512	2304	129	5	5	23	27	41	41	5	0	64	68	0	0	0
C06523	C8H17N	26	127.2273	127.1360995	75.5228	13.468	0	11.0092	0	0	0	17	51.740145	5.422676851	27.1531069	3.660216449	148.3526224	5.308267685	10.78925257	1	1	1	1	NaN	-1.037093701	2.041153745	2	2	16.29253472	40.3792	1	2	1	2	1	26	1	1	6	6	3	3	1	0	9	9	0	0	0
C06536	C13H14N2O	30	214.2631	214.1106131	72.8726	6.5859	7.4672	13.0743	0	0	0	53.07	71.22353643	6.427791955	32.48593128	3.97190984	196.1898497	5.225067534	12.67808715	2	1	2	1	10.70458931	1.557569852	1.668211271	8	16	25.35334721	64.1514	89	1	1	1	3	32	3	3	13	15	3	3	1	2	7	8	9	10	1
C06538	C13H12N2O	28	212.2472	212.094963	73.5647	5.6987	7.5381	13.1985	0	0	0	50.75	71.69710881	6.455858859	30.27820667	4.026550182	190.4226909	4.713736124	12.88575895	2	1	2	1	9.857212283	1.791236837	1.846912166	8	8	26.53343053	62.37	239	1	1	1	1	30	3	3	13	15	3	3	0	3	3	3	13	15	1
C06548	C2H4O	7	44.0526	44.02621475	54.5289	9.1521	36.3189	0	0	0	0	118.37	18.23147698	2.747580661	14.29573539	2.282622454	42.74786843	4.516210453	5.067071027	1	0	1	0	NaN	-0.046975508	-0.046975508	2	2	4.392992667	11.0435	1	1	1	1	1	7	1	1	3	3	0	0	1	0	3	3	0	0	0
C06554	C3H3N3O3	12	129.0742	129.017441	27.9158	2.3427	37.1865	32.555	0	0	0	16.18	35.85190117	3.864071791	23.75248663	3.738555512	94.69093392	4.257212181	7.696073957	6	3	6	3	NaN	0.981394096	0.981394118	64	8	9.800923852	28.3023	13	1	1	1	5	12	1	1	6	6	3	3	0	1	3	3	6	6	0
C06561	C15H12O5	32	272.2528	272.0684735	66.174	4.4427	29.3834	0	0	0	0	53.09	87.46045074	7.727600318	30.56971892	4.465041107	232.2594923	4.542944545	15.15288436	5	4	6	4	NaN	3.904815728	3.976064022	64	32	27.76894376	74.8006	262	2	2	1	2	33	2	2	12	12	8	9	0	2	8	9	12	12	2
C06575	C10H14	24	134.2182	134.1095504	89.4864	10.5136	0	0	0	0	0	23.9	50.50283788	5.295256481	28.89198938	3.453005764	149.8331033	6.700132622	10.50403458	0	0	0	0	NaN	3.731676356	3.731676356	1	1	17.61825003	45.29	1	1	1	1	1	24	1	1	6	6	4	4	0	1	4	4	6	6	1
C06576	C10H14O	25	150.2176	150.1044651	79.9553	9.3938	10.6508	0	0	0	0	23.98	52.48388903	5.676167058	29.45801537	3.468177294	158.419584	6.451337672	11.5650095	1	1	1	1	6.126891819	2.450905195	2.450905199	2	2	18.2509888	47.0647	1	1	1	1	1	25	1	1	6	6	5	5	0	1	5	5	6	6	1
C06578	C10H12O2	24	164.2011	164.0837296	73.1463	7.3661	19.4876	0	0	0	0	24.7	55.29395083	5.802014688	28.77092408	3.409433437	160.6990863	6.711178451	11.46785935	2	1	3	1	NaN	0.178670141	2.875837875	2	2	18.09447947	47.505	10	1	1	1	1	24	1	1	6	6	6	6	0	1	6	6	6	6	1
C06579	C10H14O4	28	198.2158	198.0892089	60.5941	7.1191	32.2868	0	0	0	0	36.08	59.14903043	5.765461418	33.90831171	3.811809762	182.677661	6.727229132	11.0887268	4	3	5	3	0.6218344	-2.318354931	0.203764366	8	16	19.74069374	51.993	7	4	1	4	1	28	1	1	6	6	8	8	1	0	14	14	0	0	1
C06580	C10H12O4	26	196.1999	196.0735589	61.2166	6.1648	32.6186	0	0	0	0	31.5	59.65499185	5.754923228	32.81147935	3.777701612	177.8086626	6.709522128	11.43913872	4	3	5	3	NaN	-0.534075454	2.918707231	8	8	19.36330592	51.4668	50	1	1	1	1	26	1	1	6	6	8	8	0	1	8	8	6	6	1
C06581	C10H12O6	28	228.1987	228.0633881	52.6326	5.3003	42.067	0	0	0	0	54.25	56.80574202	5.501156761	41.78997692	4.300865597	198.135953	8.60361079	9.961323515	6	3	9	3	NaN	-5.074332788	0.975845179	16	64	20.57414453	55.6447	97	4	4	1	42	27	0	0	0	0	16	15	0	0	16	15	0	0	0
C06582	C9H12O4	25	184.1892	184.0735589	58.6876	6.5668	34.7456	0	0	0	0	42.68	57.6355854	6.178720668	30.12912469	3.639397604	170.4604303	6.673886747	12.16688319	4	2	6	2	NaN	-1.422723235	1.540791309	8	16	18.08581633	49.6455	30	4	4	1	41	24	0	0	0	0	13	12	0	0	13	12	0	0	0
C06593	C6H11NO	19	113.1576	113.084064	63.6848	9.7981	14.139	12.378	0	0	0	17.41	40.9289326	3.976819403	27.7104809	3.747064903	115.5683097	5.804859269	7.329940781	1	1	2	1	7.227964829	0.309528015	0.309528032	4	4	12.26509316	31.4599	3	1	1	1	3	19	1	1	7	7	1	1	1	0	8	8	0	0	0
C06599	C6H6Cl2O2	16	181.017	179.9744849	39.8107	3.3409	17.6772	0	0	0	39.1709	16.43	45.35273496	4.822229288	29.04798889	3.550773561	131.5219771	5.922894238	9.213189024	2	2	2	2	4.820632207	0.267287185	0.267287661	16	16	15.62991337	41.9946	1	3	1	3	1	16	1	1	6	6	4	4	1	0	10	10	0	0	1
C06600	C6H4Cl2O2	14	179.001	177.9588348	40.2591	2.2524	17.8763	0	0	0	39.6121	17.29	48.1533058	4.817133275	22.6452249	3.615706684	126.8914494	4.67514682	9.160162385	2	2	2	2	NaN	2.449897191	2.574204525	4	4	15.44951784	39.6294	7	1	1	1	1	14	1	1	6	6	4	4	0	1	4	4	6	6	1
C06603	C6H6O4	16	142.1094	142.0266087	50.7104	4.2556	45.034	0	0	0	0	19.32	39.78857046	4.306559002	30.11183719	3.821884768	119.2154906	6.516098906	8.353546741	4	2	6	2	NaN	-3.117542654	-0.343161809	8	8	12.62706249	35.8925	27	4	4	1	18	15	0	0	0	0	10	9	0	0	10	9	0	0	0
C06604	C10H14NO5PS	32	291.261	291.0330298	41.2369	4.8449	27.4657	4.809	10.6344	11.009	0	81.54	74.21881288	6.173117598	48.91737818	4.907615048	237.6437041	6.983006816	11.41962125	2	0	4	0	NaN	3.315206477	3.315206477	1	1	28.36541372	72.6892	59	1	1	1	1	32	1	1	6	6	12	12	0	1	12	12	6	6	1
C06606	C10H14NO6P	32	275.195	275.0558737	43.6443	5.1277	34.883	5.0897	11.2552	0	0	84.78	70.0620474	5.793071955	48.44280324	4.875102176	227.3420269	6.938770752	10.87673094	3	0	6	0	NaN	2.425336893	2.425336893	2	1	25.07598307	64.6983	59	1	1	1	1	32	1	1	6	6	12	12	0	1	12	12	6	6	1
C06630	C28H50O10	88	546.6906	546.3403978	61.5155	9.2186	29.2659	0	0	0	0	196.93	120.873694	7.586381248	86.11357268	6.178237203	544.3972305	10.28870301	15.07413203	9	5	11	5	5.176781906	2.167187808	2.167188379	256	17	56.27948328	138.4677	6	16384	1	16384	3	89	2	2	20	20	18	19	2	0	38	39	0	0	0
C06633	C36H65NO12	114	703.9008	703.4506765	61.427	9.3076	27.2755	1.9899	0	0	0	169.75	149.3836943	9.838447448	103.3234114	7.077913704	699.6735752	11.39529227	19.17246158	12	5	14	5	10.40032093	1.446610586	2.842303916	256	18	73.20105459	179.967	6	ERROR	ERROR	ERROR	3	116	3	3	26	26	23	25	3	0	49	51	0	0	0
C06635	C21H38O7	66	402.5222	402.2617536	62.6611	9.5154	27.8235	0	0	0	0	93.39	106.1612614	7.090541018	63.55272133	5.985774084	406.9205831	8.489817357	13.26126037	6	4	8	4	5.473351188	1.709899171	1.709899327	256	128	42.05864029	104.4706	6	1024	1	1024	3	66	1	1	14	14	14	14	1	0	28	28	0	0	0
C06637	C14H9Cl3	26	283.58	281.9769834	59.2954	3.1989	0	0	0	0	37.5058	111.58	86.39531246	7.345130447	30.79160393	4.743503583	222.2997993	3.5	14.68381826	0	0	0	0	NaN	5.668433341	5.668433341	1	1	28.9760137	83.7082	1	1	1	1	1	27	2	2	12	12	5	6	0	2	5	6	12	12	2
C06638	C14H11Cl3	28	285.596	283.9926335	58.8768	3.8822	0	0	0	0	37.2411	36.85	66.4410018	6.677506143	45.68028418	4.826074464	228.7257608	9.505497543	13.11079381	0	0	0	0	NaN	5.556015261	5.556015261	1	1	29.0662475	74.8561	1	1	1	1	1	29	2	2	12	12	5	6	0	2	5	6	12	12	2
C06640	C14H10Cl2O2	28	281.134	280.005785	59.8113	3.5853	11.382	0	0	0	25.2214	38.92	71.25192388	6.983378127	45.86876244	4.688560611	225.4380459	8.02841072	13.82054851	2	1	3	1	NaN	1.433101999	4.495873709	2	2	27.85945999	71.6447	3	1	1	1	2	29	2	2	12	12	6	7	0	2	6	7	12	12	2
C06641	C13H10Cl2	25	237.124	236.0159557	65.847	4.2507	0	0	0	0	29.9025	31.47	66.77810251	6.619222876	39.02613328	3.945079218	197.3355738	7.493113548	13.14541767	0	0	0	0	NaN	5.273129196	5.273129196	1	1	25.40112333	65.4048	1	1	1	1	1	26	2	2	12	12	3	4	0	2	3	4	12	12	2
C06648	C7H5ClO	14	140.567	140.0028925	59.8113	3.5853	11.382	0	0	0	25.2214	15.93	46.09781653	4.985051998	21.48791854	3.436009774	115.1248809	3.950274543	9.883047893	1	0	2	0	NaN	2.289792837	2.289792837	2	1	14.09499913	37.4468	7	1	1	1	1	14	1	1	6	6	3	3	0	1	3	3	6	6	1
C06649	C14H11Cl5O2	32	388.501	385.9201681	43.2817	2.8539	8.2365	0	0	0	45.6279	51.76	75.84020456	6.671045889	52.11405653	5.148380703	279.0177111	8.85851626	13.24130766	2	2	2	2	4.684420621	3.640675404	3.640676351	4	4	34.49624302	90.9721	1	8	1	8	1	33	2	2	12	12	9	10	1	1	15	16	6	6	2
C06650	C14H9Cl5O2	30	386.485	383.9045181	43.5075	2.3472	8.2794	0	0	0	45.8659	47.1	74.8406937	6.696230939	53.92466366	5.12766161	274.0028139	9.650565443	13.20891736	2	2	2	2	NaN	5.815924362	5.850371756	4	4	34.19091756	89.2775	14	2	1	2	1	31	2	2	12	12	9	10	0	2	9	10	12	12	2
C06670	C7H4Cl2O2	15	191.011	189.9588348	44.0157	2.1107	16.7523	0	0	0	37.1214	20.52	54.62919466	5.336451691	24.40037067	3.901773187	137.7222714	3.589952857	9.89939162	2	1	3	1	NaN	-0.545462648	2.838918077	2	2	16.55411029	42.9238	14	1	1	1	1	15	1	1	6	6	5	5	0	1	5	5	6	6	1
C06671	C28H38Cl2N7O17P3S	96	940.53	939.0634785	35.7564	4.0724	28.9188	10.4246	9.8797	3.4092	7.5389	260.98	183.6152437	12.32485931	93.15116019	7.144030168	711.8435145	12.86100422	24.12096038	17	9	23	10	2.120196383	-8.52557785	-3.892605448	256	22	80.25049074	202.4881	5000	128	1	128	36	99	4	4	20	21	38	40	1	3	43	45	15	16	1
C06674	C6H6O5S	18	190.174	189.993594	37.8938	3.1801	42.0652	0	0	16.8609	0	54.01	51.31542065	5.154296792	26.44467537	3.597497027	143.3778897	5.925040495	9.885398719	5	3	7	3	NaN	-1.836903755	0.547021889	8	8	16.31426115	40.6423	107	1	1	1	1	18	1	1	6	6	6	6	0	1	6	6	6	6	1
C06675	C6H6O7S	20	222.173	221.9834232	32.4361	2.722	50.4093	0	0	14.4324	0	68.54	50.82842908	4.949203769	39.11889774	4.225844479	163.7058261	7.018289598	9.874374338	7	3	11	3	NaN	-9.45957003	-0.700073519	8	64	17.39560547	45.4595	157	4	4	1	15	19	0	0	0	0	14	13	0	0	14	13	0	0	0
C06677	C7H8O3S	19	172.202	172.0194148	48.8234	4.6826	27.8732	0	0	18.6206	0	53.52	52.29163469	5.402644491	25.57996758	3.581986972	143.3415977	6.041331828	10.21916921	3	1	5	1	NaN	-0.708824796	1.667573922	2	2	16.70725293	41.7217	22	1	1	1	1	19	1	1	6	6	5	5	0	1	5	5	6	6	1
C06678	C7H8O4S	20	188.201	188.0143294	44.6729	4.2845	34.0049	0	0	17.0376	0	53.43	54.35331644	5.845189088	25.19256086	3.460540148	151.8997469	5.813797122	11.25358016	4	2	6	2	NaN	-1.989595982	-1.65534204	4	4	17.45083208	43.4964	22	1	1	1	1	20	1	1	6	6	6	6	0	1	6	6	6	6	1
C06711	C13H10O	24	182.2179	182.0731649	85.6881	5.5315	8.7804	0	0	0	0	36.65	62.55270195	5.6008413	29.77127104	4.040986119	165.9356163	5.222425688	11.25569377	1	1	1	1	5.31350167	2.664115727	2.664115782	4	4	23.11191938	56.2349	1	1	1	1	1	26	3	3	13	15	1	1	1	2	2	4	12	12	3
C06712	C13H8O	22	180.202	180.0575149	86.6467	4.4747	8.8786	0	0	0	0	42.45	63.90790529	5.636466282	25.7775713	4.142018229	159.4558679	3.400000002	11.19494671	1	0	2	0	NaN	3.106578399	3.106578399	2	1	22.728601	55.7117	111	1	1	1	1	24	3	3	13	15	1	1	1	2	2	4	12	12	3
C06714	C28H46N7O20P3S	105	925.686	925.1731172	36.3298	5.0087	34.5677	10.5918	10.0381	3.4639	0	260.29	195.0592386	13.40950828	103.1150864	7.591140049	734.8866349	13.59180153	26.15454664	20	11	27	12	2.10051619	-14.67799169	-7.230633296	256	26	79.19007595	198.4198	5000	256	1	256	72	107	3	3	14	15	45	46	1	2	50	51	9	10	0
C06715	C28H44N7O20P3S	103	923.67	923.1574671	36.4091	4.8014	34.6431	10.6149	10.06	3.4715	0	260.77	188.3704277	12.50687829	104.3415902	7.445023186	728.2929213	10.91970435	23.89992102	20	10	28	11	2.094568709	-14.22439978	-6.668451772	256	25	78.66361646	197.5975	5000	128	1	128	216	105	3	3	14	15	45	46	1	2	50	51	9	10	0
C06719	C6H8O3	17	128.1259	128.0473441	56.2448	6.2934	37.4617	0	0	0	0	16.9	38.27190641	3.956623246	27.53196165	3.534847451	113.5054744	5.826633193	7.7389565	3	2	4	2	2.709730141	-0.667735056	-0.644341678	32	16	12.18748447	32.8589	5	2	1	2	5	17	1	1	6	6	3	3	1	0	9	9	0	0	1
C06723	C28H44N7O19P3S	102	907.671	907.1625525	37.0508	4.8861	33.4911	10.802	10.2373	3.5327	0	253.08	178.9871763	13.20226401	98.90713487	7.006524609	718.77704	15.30036908	26.39502218	19	10	26	11	2.104017311	-13.14176643	-5.76800518	256	24	78.2218987	197.9976	5000	256	2	128	108	104	3	3	14	15	44	45	1	2	49	50	9	10	0
C06727	C8H12O2	22	140.1797	140.0837296	68.5446	8.6284	22.827	0	0	0	0	25.34	46.1703988	4.693263566	30.2837825	3.985923844	137.7661945	6.27848558	8.92558801	2	2	2	2	5.122492885	0.481691201	0.481691399	4	4	15.49096505	41.4452	1	4	1	4	1	22	1	1	6	6	4	4	1	0	10	10	0	0	1
C06729	C8H10O4	22	170.1626	170.0579088	56.4669	5.9234	37.6097	0	0	0	0	27.86	48.82041381	5.25364386	29.82189853	3.585571032	148.7106796	6.345830189	10.37021217	4	3	5	3	0.06252998	-3.369895212	-0.256746808	8	8	16.09176818	42.9686	3	4	1	4	1	22	1	1	6	6	6	6	1	0	12	12	0	0	1
C06730	C7H8O2	17	124.1372	124.0524295	67.7274	6.4957	25.777	0	0	0	0	19.85	43.92328687	4.442295312	22.22127865	3.562531224	115.7835533	4.579496314	8.782081816	2	2	2	2	NaN	1.878327993	1.879536562	4	4	13.30125399	35.061	14	1	1	1	1	17	1	1	6	6	3	3	0	1	3	3	6	6	1
C06731	C8H10O4	22	170.1626	170.0579088	56.4669	5.9234	37.6097	0	0	0	0	28.26	48.25400805	4.758102052	31.86206084	4.072056527	148.7711152	6.626571187	8.722633081	4	3	5	3	0.060565442	-3.372299088	-0.256746808	8	8	16.09176818	42.9686	3	4	1	4	1	22	1	1	6	6	6	6	1	0	12	12	0	0	1
C06749	C28H44N7O18P3S	101	891.671	891.1676379	37.7157	4.9737	32.2977	10.9959	10.421	3.5961	0	252.78	179.1997659	11.67808541	93.52002985	6.912366822	704.6401908	12.56656703	23.11087957	18	10	24	11	2.120203368	-10.82142946	-6.188457055	256	24	77.51323275	195.8016	5000	256	1	256	36	104	4	4	20	21	37	39	2	2	48	50	9	10	1
C06754	C2H3ClO	7	78.498	77.98724243	30.6013	3.8521	20.3819	0	0	0	45.1642	0.92	23.64571339	3.435786519	17.21615081	2.599371374	61.50802194	4.849276849	6.484022302	1	0	2	0	NaN	0.155375574	0.155381843	4	4	6.418966195	16.4715	2	1	1	1	2	6	0	0	0	0	4	3	0	0	4	3	0	0	0
C06755	C2H3ClO2	8	94.497	93.98215705	25.4203	3.1999	33.8622	0	0	0	37.5176	1.05	26.97185245	3.683138005	18.57315394	2.808249218	69.96250085	4.929677517	7.307501706	2	1	3	1	NaN	-3.074147779	0.313998096	4	4	6.995690863	17.3969	3	1	1	1	2	7	0	0	0	0	5	4	0	0	5	4	0	0	0
C06756	C8H10	18	106.165	106.0782503	90.5059	9.4941	0	0	0	0	0	19.33	44.64589414	4.617190138	23.06977074	3.452798234	115.7024013	4.151683368	9.187010577	0	0	0	0	NaN	3.000088595	3.000088595	1	1	13.92707115	36.1404	1	1	1	1	1	18	1	1	6	6	2	2	0	1	2	2	6	6	1
C06757	C8H10O	19	122.1644	122.0731649	78.6527	8.2507	13.0966	0	0	0	0	19.28	46.71363542	5.116128446	25.50837518	3.567559625	124.2551872	4.706756089	10.13505071	1	1	1	1	6.134393	1.719317434	1.719317438	2	2	14.56014681	37.9151	1	1	1	1	1	19	1	1	6	6	3	3	0	1	3	3	6	6	1
C06762	C6H10O4	20	146.1412	146.0579088	49.3114	6.897	43.7916	0	0	0	0	10.88	44.55054536	4.977719213	29.77827458	3.319100977	134.6955299	6.73907203	9.860415247	4	2	6	2	0.248054816	-2.894706355	0.424736063	16	8	13.13477005	33.3341	5	2	1	2	14	19	0	0	0	0	10	9	0	0	10	9	0	0	0
C06790	C2HCl3	6	131.388	129.9143832	18.2828	0.7671	0	0	0	0	80.9503	3.29	31.78498012	3.848200531	18.57906714	3.129242344	79.51412782	3.5	7.188263498	0	0	0	0	NaN	2.17833483	2.17833483	1	2	9.912590687	35.177	1	1	1	1	1	5	0	0	0	0	5	4	0	0	5	4	0	0	0
C06801	C23H20O11	54	472.3983	472.1005615	58.4774	4.2673	37.2553	0	0	0	0	101.79	110.2932899	8.352172231	59.76826524	4.916661803	386.9501742	9.251769662	16.55601873	10	4	14	4	2.535198612	0.852043916	0.857853507	256	256	44.93055715	115.9063	4675	8	1	8	6	57	4	4	18	21	16	16	2	2	24	26	10	11	4
C06813	C6H5NO2	14	123.1094	123.0320284	58.5367	4.0937	25.9922	11.3774	0	0	0	18.62	42.83984035	4.359541672	18.71018213	3.40244735	104.9704556	3.4	8.638023008	2	0	4	0	NaN	1.913230005	1.913230005	4	1	12.20126912	33.3827	11	1	1	1	1	14	1	1	6	6	3	3	0	1	3	3	6	6	1
C06868	C15H12N2O	30	236.2686	236.094963	76.2524	5.1193	6.7717	11.8566	0	0	0	71.1	67.7829856	5.783764016	39.74936405	4.491029435	210.0953212	6.871349663	11.49639606	1	1	2	2	6.092238172	2.766030386	2.766030386	4	4	26.94937723	71.888	476	1	1	1	2	32	3	3	15	17	3	3	1	2	6	8	12	12	2
C06899	C2H3Cl3O2	10	165.403	163.9198625	14.523	1.8282	19.346	0	0	0	64.3029	2.63	33.83385492	3.780700628	27.164627	3.169518404	104.6549892	6.565355575	6.94655409	2	2	2	2	NaN	0.691014426	0.692355014	4	8	11.63582251	29.2457	1	1	1	1	1	9	0	0	0	0	7	6	0	0	7	6	0	0	0
C06990	C6H5Cl	12	112.557	112.0079779	64.0246	4.4775	0	0	0	0	31.4978	12.26	39.07379992	4.242121335	18.71335054	3.402996215	95.94613571	3.45	8.461490346	0	0	0	0	NaN	2.577290492	2.577290492	1	1	12.18733243	30.8628	1	1	1	1	1	12	1	1	6	6	1	1	0	1	1	1	6	6	1
C07083	C8H8	16	104.1491	104.0626003	92.2577	7.7423	0	0	0	0	0	21	44.45308827	4.780810497	19.06408369	3.361535644	108.5671363	3.4	9.543715107	0	0	0	0	NaN	2.709947884	2.709947884	1	1	13.9506435	35.7443	1	1	1	1	1	16	1	1	6	6	2	2	0	1	2	2	6	6	1
C07084	C8H10O2	20	138.1638	138.0680796	69.5447	7.2953	23.16	0	0	0	0	28.88	45.28685837	4.753168098	28.7502058	3.676314918	130.3939912	6.234992702	9.450131302	2	2	2	2	5.101816292	0.177703201	0.177703413	4	4	15.24895222	41.4893	1	4	1	4	1	20	1	1	6	6	4	4	1	0	10	10	0	0	1
C07086	C8H8O2	18	136.1479	136.0524295	70.5744	5.9226	23.503	0	0	0	0	17.29	46.54477289	4.882905899	26.9628238	3.491736693	126.5911387	5.867317958	9.55538517	2	1	3	1	NaN	-0.808613938	1.610994105	2	2	14.51833087	37.3656	3	1	1	1	2	18	1	1	6	6	4	4	0	1	4	4	6	6	1
C07088	C8H7ClO3	19	186.592	186.0083718	51.495	3.7813	25.7236	0	0	0	19.0003	18.62	56.5024019	6.359161723	24.91844733	3.39486294	149.7109136	4.964617293	12.68593182	3	1	4	1	NaN	-1.465591723	1.897602535	8	8	17.14869033	43.4106	15	1	1	1	2	19	1	1	6	6	6	6	0	1	6	6	6	6	1
C07090	C5H4O2	11	96.0841	96.02112937	62.501	4.1961	33.3029	0	0	0	0	26.83	33.76211704	4.059291275	16.83501681	2.89911398	80.17188288	3.400000006	8.038327457	1	0	2	0	NaN	0.756821411	0.756821411	2	2	9.50828832	26.0101	12	1	1	1	1	11	1	1	5	5	2	2	1	0	7	7	0	0	0
C07091	C5H6O3	14	114.0993	114.0316941	52.6327	5.3003	42.067	0	0	0	0	25.91	37.61334388	4.491869029	20.01244481	3.003559091	101.3873154	4.640088784	8.852647298	3	1	5	1	NaN	-3.044839518	0.288711191	8	8	10.37005227	28.1581	9	2	2	1	9	13	0	0	0	0	8	7	0	0	8	7	0	0	0
C07092	C6H4Cl2	12	147.002	145.9690055	49.0226	2.7427	0	0	0	0	48.2347	12.49	44.0188506	4.854686731	20.77092655	3.325945674	109.8534472	3.5	9.637515464	0	0	0	0	NaN	3.181335169	3.181335169	1	1	14.07266919	35.6676	1	1	1	1	1	12	1	1	6	6	2	2	0	1	2	2	6	6	1
C07093	C6H6Cl2O2	16	181.017	179.9744849	39.8107	3.3409	17.6772	0	0	0	39.1709	19.28	43.76719233	4.816714519	27.87493149	3.401141492	131.6524394	6.361835098	9.57860158	2	2	2	2	4.449931955	0.267285898	0.267287661	4	4	15.62960716	41.9946	1	3	1	3	1	16	1	1	6	6	4	4	1	0	10	10	0	0	1
C07094	C6H4Cl2O2	14	179.001	177.9588348	40.2591	2.2524	17.8763	0	0	0	39.6121	17.46	48.41562335	4.851536666	22.72114254	3.73870245	126.8865961	4.068903939	9.682353689	2	2	2	2	NaN	2.372865566	2.574204525	4	4	15.45088163	39.6294	8	1	1	1	1	14	1	1	6	6	4	4	0	1	4	4	6	6	1
C07095	C6H4Cl2O4	16	211	209.948664	34.1536	1.9108	30.3306	0	0	0	33.6047	37.3	55.79363406	5.58141528	24.72318867	3.582906431	147.4065943	4.694869864	10.42507086	4	2	6	2	NaN	-5.40856343	1.264205975	4	16	16.39264587	44.5082	15	3	3	1	6	15	0	0	0	0	12	11	0	0	12	11	0	0	0
C07096	C6H4Cl2O	13	163.001	161.9639202	44.2109	2.4735	9.8155	0	0	0	43.5003	15.33	45.89809529	4.423435852	23.57948217	3.999297226	118.4095161	4.355947036	8.42307988	1	1	1	1	NaN	2.251558824	2.877769847	2	2	14.77290079	37.6485	5	1	1	1	1	13	1	1	6	6	3	3	0	1	3	3	6	6	1
C07097	C6H4Cl2O2	14	179.001	177.9588348	40.2591	2.2524	17.8763	0	0	0	39.6121	17.35	48.03177215	4.455511782	27.35220122	4.163914476	126.8607996	4.707620359	8.45043832	2	2	2	2	NaN	2.265628436	2.574204525	4	4	15.45514083	39.6294	9	1	1	1	1	14	1	1	6	6	4	4	0	1	4	4	6	6	1
C07098	C6H3Cl3O	13	197.446	195.9249478	36.4982	1.5315	8.1032	0	0	0	53.8674	15.55	50.82645744	4.57390983	27.3068231	4.422664525	132.3471794	4.353393552	8.423150562	1	1	1	1	NaN	2.467805747	3.481814523	2	2	16.73304948	42.4533	5	1	1	1	1	13	1	1	6	6	4	4	0	1	4	4	6	6	1
C07100	C8H5Cl3O3	19	255.483	253.9304271	37.6094	1.9726	18.7872	0	0	0	41.6306	20.42	66.40767558	6.359284465	30.80989229	4.289640096	177.6328695	4.93857183	12.69499395	3	1	4	1	NaN	-0.373296324	3.105691888	8	8	21.13553288	53.0202	21	1	1	1	2	19	1	1	6	6	8	8	0	1	8	8	6	6	1
C07101	C6H3Cl3O	13	197.446	195.9249478	36.4982	1.5315	8.1032	0	0	0	53.8674	16.29	51.07010153	4.849467521	25.56496679	3.837995813	132.3653076	4.177531825	9.509941685	1	1	1	1	NaN	3.091365102	3.481814523	2	2	16.73799421	42.4533	7	1	1	1	1	13	1	1	6	6	4	4	0	1	4	4	6	6	1
C07102	C6H5ClO3	15	160.555	159.9927217	44.8844	3.1389	29.8952	0	0	0	22.0815	18.82	45.36288377	4.56411776	23.58552694	3.613394615	121.4108831	4.333136363	8.651965732	3	3	3	3	NaN	1.64799494	1.666594527	8	8	14.14559794	36.8055	19	1	1	1	1	15	1	1	6	6	4	4	0	1	4	4	6	6	1
C07103	C6H4O3	13	124.0942	124.016044	58.0722	3.249	38.6788	0	0	0	0	20.19	39.10035732	4.139604995	21.7634271	3.521369316	99.49907072	4.295909545	8.177899957	3	1	5	1	2.912474336	0.492907996	0.50545613	8	16	11.40075225	32.9962	20	1	1	1	2	13	1	1	6	6	3	3	1	0	9	9	0	0	1
C07108	C26H29NO	57	371.5146	371.2249146	84.0554	7.8679	4.3065	3.7702	0	0	0	116.26	109.6172264	8.571525518	68.0361587	6.283574044	374.2937208	7.195778558	16.02343889	2	0	2	0	NaN	4.587333761	6.351221956	4	4	46.4945988	128.4308	133	2	2	1	1	59	3	3	18	18	10	12	0	3	10	12	18	18	3
C07111	C8H10	18	106.165	106.0782503	90.5059	9.4941	0	0	0	0	0	17.17	42.37896895	4.696554742	24.36759124	3.401776002	115.8611842	5.557256413	9.375360353	0	0	0	0	NaN	2.93123587	2.93123587	1	1	14.01012227	35.7002	1	1	1	1	1	18	1	1	6	6	2	2	0	1	2	2	6	6	1
C07112	C8H10O	19	122.1644	122.0731649	78.6527	8.2507	13.0966	0	0	0	0	18.12	45.00822282	4.755756479	25.46430636	3.393075638	124.5462826	5.376439075	9.392202907	1	1	1	1	5.968094836	1.622471067	1.622471073	2	2	14.63980611	37.2927	1	2	1	2	1	19	1	1	6	6	3	3	0	1	3	3	6	6	1
C07113	C8H8O	17	120.1485	120.0575149	79.9724	6.7113	13.3164	0	0	0	0	19.73	46.35525663	4.83552161	22.03655327	3.441665075	118.1442629	4.175671465	9.468435394	1	0	2	0	NaN	1.530893334	1.530893335	4	2	14.07296532	36.4608	7	1	1	1	2	17	1	1	6	6	3	3	0	1	3	3	6	6	1
C07114	C9H8O3	20	164.158	164.0473441	65.8489	4.912	29.239	0	0	0	0	23.01	53.99850257	5.917505201	24.90787547	3.377242822	145.9943636	5.546233488	11.46074148	3	1	5	1	NaN	-1.564813829	1.423121781	8	4	16.43759597	42.8049	21	1	1	1	4	20	1	1	6	6	6	6	0	1	6	6	6	6	1
C07118	C30H42N7O18P3S	101	913.677	913.1519878	39.4364	4.6333	31.5198	10.731	10.17	3.5094	0	286.05	196.1568472	14.23659987	104.3877726	7.571850913	721.5125442	11.57465325	28.37994074	18	9	25	10	2.120196386	-10.14139595	-5.508401744	256	23	80.06679209	202.3692	4488	128	1	128	72	104	4	4	20	21	39	41	1	3	44	46	15	16	1
C07208	C8H10	18	106.165	106.0782503	90.5059	9.4941	0	0	0	0	0	19.4	44.65066656	4.44486372	24.57386662	3.768543467	115.664543	4.916800906	8.935140284	0	0	0	0	NaN	3.000088595	3.000088595	1	1	13.92743174	36.1404	1	1	1	1	1	18	1	1	6	6	2	2	0	1	2	2	6	6	1
C07212	C8H10	18	106.165	106.0782503	90.5059	9.4941	0	0	0	0	0	19.33	43.70186271	4.123042442	25.03737968	3.873305015	115.852207	4.25274328	7.547451412	0	0	0	0	NaN	3.000088595	3.000088595	1	1	13.92733052	36.1404	1	1	1	1	1	18	1	1	6	6	2	2	0	1	2	2	6	6	1
C07213	C8H10O	19	122.1644	122.0731649	78.6527	8.2507	13.0966	0	0	0	0	19.97	45.90192552	4.602735519	26.41963885	3.954523653	124.4283573	5.408984975	9.295282409	1	1	1	1	6.116633151	1.719317434	1.719317438	2	2	14.5605031	37.9151	1	1	1	1	1	19	1	1	6	6	3	3	0	1	3	3	6	6	1
C07215	C8H8O2	18	136.1479	136.0524295	70.5744	5.9226	23.503	0	0	0	0	23.54	49.46635797	4.718593316	25.83067113	4.21864832	126.809616	4.203199425	8.350061069	2	1	3	1	NaN	-0.775801987	2.144250113	2	2	14.41734472	38.3554	14	1	1	1	2	18	1	1	6	6	4	4	0	1	4	4	6	6	1
C07216	C8H10O	19	122.1644	122.0731649	78.6527	8.2507	13.0966	0	0	0	0	19.32	46.54839275	4.882160936	26.06560171	3.846392949	124.2647016	5.59075457	9.151451623	1	1	1	1	6.130149603	1.719317434	1.719317438	2	2	14.56019378	37.9151	1	1	1	1	1	19	1	1	6	6	3	3	0	1	3	3	6	6	1
C07271	C10H16O	27	152.2334	152.1201151	78.8966	10.5936	10.5098	0	0	0	0	147.29	46.31541251	4.577136604	35.04412756	3.642230532	160.2626808	7.188861672	8.965141753	1	0	1	0	NaN	2.319031143	2.319031143	2	2	18.14802305	45.2408	1	8	1	8	1	28	2	2	7	8	4	4	2	0	11	12	0	0	1
C07394	C47H51NO14	113	853.9061	853.3309553	66.1083	6.02	26.2314	1.6403	0	0	0	291.42	167.6321487	11.00359647	120.1180122	8.289709444	763.2248645	14.47417313	19.1700138	10	4	16	4	4.652541493	3.538652344	3.53884002	256	17	86.54274945	218.2945	2160	2048	1	2048	6	119	7	7	35	38	27	30	4	3	44	50	18	18	6
C07446	C6H5NO2	14	123.1094	123.0320284	58.5367	4.0937	25.9922	11.3774	0	0	0	16.17	43.29999279	4.505364034	19.11992416	3.38740864	105.5722037	3.400000001	8.716856105	3	1	4	1	4.718859407	-2.744384625	0.148589494	4	4	11.79310259	31.1573	15	1	1	1	1	14	1	1	6	6	3	3	0	1	3	3	6	6	0
C07447	C2H6N2O	11	74.0818	74.04801282	32.4255	8.1635	21.5969	37.8141	0	0	0	5.2	27.8438818	3.733114932	18.43264408	2.808770748	70.68223641	5.112610315	7.456740585	2	2	3	3	8.227150032	-1.326846738	-1.326764021	8	16	7.0930084	18.95	3	1	1	1	4	10	0	0	0	0	5	4	0	0	5	4	0	0	0
C07481	C8H10N4O2	24	194.1906	194.0803756	49.48	5.1905	16.478	28.8514	0	0	0	49.12	62.0081256	5.033222418	30.99025967	4.353692654	164.240554	4.998617055	9.807169426	3	0	5	0	NaN	-0.545645596	-0.545645592	4	2	17.86853255	49.8312	92	1	1	1	1	25	2	2	9	10	5	5	0	2	5	5	9	10	0
C07490	C2H3Cl3O	9	149.404	147.9249478	16.0782	2.0239	10.7088	0	0	0	71.1889	2.22	30.73348011	3.801177684	26.71251997	3.221290204	96.01792717	6.387908848	6.895279861	1	1	1	1	4.317548463	1.056577616	1.056578955	2	2	10.88891438	28.2158	1	1	1	1	1	8	0	0	0	0	6	5	0	0	6	5	0	0	0
C07495	C15H14N2O3	34	270.2833	270.1004423	66.6562	5.2209	17.7585	10.3645	0	0	0	67.18	69.09129504	5.763546162	46.80565657	4.681151145	235.2812741	8.074163789	11.34211104	3	3	4	4	4.856306957	0.812744195	0.812744829	16	16	28.2648833	73.4944	51	3	1	3	2	36	3	3	15	17	5	5	1	2	8	10	12	12	2
C07496	C15H12N2O2	31	252.268	252.0898776	71.4163	4.7946	12.6844	11.1046	0	0	0	176.4	65.85681696	5.623811634	42.35667221	4.534917325	215.0582164	7.356041184	11.17182601	2	1	3	2	6.07359528	1.974448401	1.974448401	8	8	26.97987443	69.9843	51	3	1	3	2	34	4	4	16	19	3	3	2	2	7	10	12	12	2
C07535	C20H12	32	252.3093	252.0939004	95.2062	4.7938	0	0	0	0	0	63.96	88.13334684	6.885173661	30.03883883	4.719521649	227.455325	3.4	13.66452813	0	0	0	0	NaN	5.273404237	5.273404237	1	1	37.7372461	83.1728	1	1	1	1	1	36	5	5	20	24	0	0	0	5	0	0	20	24	5
C07585	C8H9N3O2	22	179.176	179.0694765	53.6264	5.0629	17.8589	23.4519	0	0	0	22.35	56.95811788	6.096138466	25.91462411	3.560735048	155.9111544	5.560531931	12.14852428	3	2	5	2	6.557153967	-0.983735258	-0.983235685	32	32	17.21713954	45.8454	40	1	1	1	9	22	1	1	6	6	7	7	0	1	7	7	6	6	0
C07643	C7H15Cl2N2O3P	30	277.085	276.0197343	30.3426	5.4565	17.3226	10.11	11.1784	0	25.59	71.91	68.07491611	5.736926952	45.5017366	5.349937815	217.9880023	7.400603345	11.21538577	3	2	4	2	4.170987978	-0.057348991	-0.057332873	4	4	24.07637436	59.0944	5	4	1	4	5	30	1	1	6	6	9	9	1	0	15	15	0	0	0
C07644	C7H13Cl2N2O3P	28	275.069	274.0040842	30.565	4.7636	17.4495	10.1841	11.2604	0	25.7775	75.28	63.69140867	6.018324447	42.12648324	4.818383058	210.4725668	7.180196344	11.99533471	2	1	4	1	NaN	-0.111448958	-0.08861311	4	4	23.19866988	58.3912	12	2	1	2	9	28	1	1	6	6	9	9	1	0	15	15	0	0	0
C07645	C7H15Cl2N2O3P	30	277.085	276.0197343	30.3426	5.4565	17.3226	10.11	11.1784	0	25.59	68.51	68.67719483	6.298736771	48.05749531	5.094865854	222.3149784	7.528903453	12.36419468	3	1	5	2	4.938712562	-0.459184401	-0.459183382	8	8	24.24021108	60.5436	10	2	1	2	4	29	0	0	0	0	15	14	0	0	15	14	0	0	0
C07646	C7H15Cl2N2O4P	31	293.085	292.0146489	28.6862	5.1586	21.8358	9.5581	10.5682	0	24.193	68.3	69.65855161	6.40368445	49.42901365	5.160705281	230.783356	8.760499332	12.8683105	4	2	6	3	0.923277584	-2.769596296	-0.30056713	8	8	24.78719738	61.469	15	2	1	2	4	30	0	0	0	0	16	15	0	0	16	15	0	0	0
C07649	C4H3FN2O2	12	130.0772	130.0178556	36.9341	2.3246	24.5999	21.536	0	0	14.6055	20.45	38.97460894	4.155957936	20.9081409	3.747977894	93.6017572	3.4	8.163818569	2	2	4	2	NaN	-0.724217521	-0.65584809	8	4	9.588146628	26.1722	16	1	1	1	6	12	1	1	6	6	3	3	0	1	3	3	6	6	0
C07715	C13H10	23	166.2185	166.0782503	93.9361	6.0639	0	0	0	0	0	36.59	61.13553384	5.610568028	26.95614835	3.759690879	157.3139506	4.57970051	11.20275539	0	0	0	0	NaN	3.739019389	3.739019389	2	2	22.53089852	54.8734	1	1	1	1	1	25	3	3	13	15	0	0	1	2	1	3	12	12	3
C07720	C9H8O2	19	148.1586	148.0524295	72.9599	5.4425	21.5977	0	0	0	0	23.44	49.31340494	4.648553519	27.22468486	3.948666857	131.4951009	4.988528441	8.796958539	2	1	3	1	5.330145208	0.761652338	0.761652396	8	4	15.78729163	41.0872	10	2	1	2	3	20	2	2	9	10	2	2	1	1	5	6	6	6	2
C07727	C9H8O	18	132.1592	132.0575149	81.7925	6.1014	12.1062	0	0	0	0	20.14	46.52711266	4.765339744	24.77726655	3.654394984	122.775243	4.985282362	9.51754852	1	0	2	0	NaN	1.801713625	1.801713632	8	4	15.19680058	39.5806	2	1	1	1	2	19	2	2	9	10	1	1	1	1	4	5	6	6	2
C07728	C9H8O2	19	148.1586	148.0524295	72.9599	5.4425	21.5977	0	0	0	0	31.08	49.49595975	5.00392684	25.29691626	3.629189329	132.5956938	5.304300053	9.555800826	1	0	2	0	NaN	1.508115463	1.508115463	2	2	15.87784547	40.6893	3	1	1	1	1	20	2	2	10	11	1	1	1	1	5	6	6	6	1
C07729	C12H8O	21	168.1913	168.0575149	85.6931	4.7943	9.5126	0	0	0	0	40.87	60.26262747	5.610870589	23.74671743	3.933737753	149.5671843	3.400000007	10.9990234	0	0	0	0	NaN	3.151247097	3.151247097	2	2	22.4379241	51.2268	77	1	1	1	1	23	3	3	13	15	0	0	0	3	0	0	13	15	2
C07732	C12H8O2	22	184.1907	184.0524295	78.2496	4.3778	17.3726	0	0	0	0	38.13	63.11981817	5.861455924	25.9530012	3.827423442	159.6321702	3.946054918	11.45079329	0	0	0	0	NaN	3.000574366	3.000574366	4	1	20.66551726	52.4816	65	1	1	1	1	24	3	3	14	16	0	0	1	2	2	4	12	12	2
C07733	C12H10O4	26	218.2054	218.0579088	66.0517	4.6192	29.3291	0	0	0	0	37.48	63.34116971	5.556416468	36.42819455	4.103153559	187.2436328	6.250713406	10.92439639	3	3	3	3	NaN	2.208069315	2.562837034	16	8	22.4820466	58.2415	354	1	1	1	1	27	2	2	12	12	4	5	0	2	4	5	12	12	2
C07734	C12H10O6	28	250.2042	250.0477381	57.6043	4.0285	38.3672	0	0	0	0	42.86	64.54823519	5.750365763	42.53739105	4.01939581	207.4709086	8.076630918	11.37003159	5	3	7	3	NaN	-1.073253573	2.351264177	16	16	23.48536676	63.4206	688	4	4	1	15	28	1	1	6	6	12	12	0	1	12	12	6	6	1
C07836	C7H15O10P	33	290.1618	290.0402832	28.9752	5.2106	55.1396	0	10.6747	0	0	63.85	65.61250892	6.055078014	38.56637125	4.139882889	224.9652999	6.958248483	12.02039028	9	7	10	7	NaN	-6.663732406	-3.686440191	256	14	22.30592095	52.7588	4	64	1	64	1	33	1	1	6	6	12	12	1	0	18	18	0	0	0
C07838	C7H15O10P	33	290.1618	290.0402832	28.9752	5.2106	55.1396	0	10.6747	0	0	61.59	69.28096728	5.652633155	45.41566213	4.846454956	224.9219478	7.957500684	10.16978639	9	7	10	7	NaN	-6.899479122	-3.686440191	256	15	22.30592095	52.7588	4	64	1	64	1	33	1	1	6	6	12	12	1	0	18	18	0	0	0
C07888	C7H15Cl2N2O2P	29	261.086	260.0248197	32.202	5.7909	12.256	10.7296	11.8634	0	27.1581	71.71	64.89836471	5.502352906	45.49992538	5.347963763	209.3902378	7.400838419	10.55396736	2	1	3	1	6.095357578	0.096547043	0.096547687	2	2	23.37383687	58.4781	5	2	1	2	4	29	1	1	6	6	8	8	1	0	14	14	0	0	0
C08060	C12H9N	22	167.2066	167.0734993	86.1978	5.4253	0	8.3769	0	0	0	42.47	61.54954025	5.607230779	23.41949422	3.765510857	151.9029434	3.726265604	11.20841519	0	1	0	1	NaN	3.090885685	3.090885689	2	2	23.34174592	53.4722	75	1	1	1	1	24	3	3	13	15	0	0	0	3	0	0	13	15	2
C08061	C12H11NO2	26	201.2212	201.0789786	71.6268	5.51	15.9023	6.9608	0	0	0	41.06	61.06172096	5.769308805	33.10886986	4.103533629	180.5825578	6.550979482	11.42625267	3	3	3	4	6.352877482	2.181107349	2.184414581	8	8	23.65287507	59.8564	260	1	1	1	1	27	2	2	12	12	3	4	0	2	3	4	12	12	2
C08276	C4H8O2S	15	120.17	120.0245002	39.979	6.7101	26.6279	0	0	26.683	0	8.12	39.64094856	5.147807189	21.80523117	2.953278479	108.7424499	6.383668626	10.34868075	2	1	3	1	NaN	-1.464600443	0.834797582	2	4	11.71282785	29.7249	3	1	1	1	2	14	0	0	0	0	7	6	0	0	7	6	0	0	0
C08300	C9H13NO	24	151.2056	151.099714	71.4896	8.6658	10.5812	9.2633	0	0	0	21.98	50.21774498	5.258947241	29.07873316	3.496625675	153.6313995	6.032368855	10.3862598	2	2	2	3	11.62376135	-1.401544129	0.885254335	4	4	18.00671966	44.9127	1	4	1	4	1	24	1	1	6	6	5	5	0	1	5	5	6	6	1
C08526	C17H21NO3	42	287.3535	287.1521435	71.056	7.3661	16.7035	4.8744	0	0	0	80.44	80.13424113	6.251255514	50.55988348	5.352400394	267.1258543	7.574478479	11.02531244	4	1	4	1	11.8692264	-0.740816282	1.163042804	16	16	31.64751182	82.3049	14	8	1	8	1	45	4	4	17	20	4	4	3	1	15	18	6	6	2
C08537	C30H34N2O19	85	726.593	726.1755769	49.5905	4.7165	41.8375	3.8554	0	0	0	125.31	177.3251717	11.64962887	79.7701229	7.111399471	586.4377653	8.900175318	23.27735152	20	11	25	11	2.840480569	-16.08851163	-6.829223572	256	28	63.08692204	181.9865	2515	16384	4	4096	132	89	5	5	27	28	24	27	4	1	45	49	6	6	1
C08539	C18H16N2O8	44	388.3282	388.0906655	55.6727	4.1529	32.9606	7.2138	0	0	0	77.48	107.209349	8.286644476	53.07097706	5.904964567	313.8874396	7.555752543	16.42299617	9	5	13	5	3.481280387	-8.950677113	-2.931246433	256	13	35.47768643	117.5614	2502	16	4	4	66	46	3	3	15	16	13	14	2	1	22	24	6	6	1
C08540	C24H26N2O13	65	550.4688	550.1434889	52.3657	4.7607	37.7846	5.089	0	0	0	107.3	139.2282407	10.26939029	57.80353829	5.501352553	449.3689836	8.798942309	20.54671962	14	8	18	8	3.464180143	-11.21300032	-5.378662464	256	22	49.26957549	149.7058	2502	512	4	128	66	68	4	4	21	22	18	20	3	1	33	36	6	6	1
C08544	C24H26N2O13	65	550.4688	550.1434889	52.3657	4.7607	37.7846	5.089	0	0	0	109.39	137.6375677	8.908755754	65.52074037	6.397867315	449.2241943	8.314353336	16.36208062	14	8	18	8	3.465482749	-11.20586148	-5.378662464	256	22	49.26952292	149.7058	2502	512	4	128	66	68	4	4	21	22	18	20	3	1	33	36	6	6	1
C08552	C34H34N2O16	86	726.6376	726.1908331	56.1991	4.7162	35.2294	3.8552	0	0	0	163.4	182.9311276	12.72141385	82.16882318	8.331338514	601.2908328	10.97746399	24.57268597	16	8	21	8	3.464178718	-8.640930083	-2.806008334	256	24	67.42771256	197.7176	4230	1024	8	128	66	90	5	5	27	28	25	28	3	2	40	44	12	12	2
C08590	C40H56O	97	552.872	552.4331164	86.8968	10.2094	2.8939	0	0	0	0	186.65	177.055426	15.47144784	81.29821456	6.338611362	593.9342165	11.26627695	30.62146412	1	1	1	1	8.918437132	9.781020395	9.781020398	2	2	71.16349689	193.5479	1	2048	512	4	1	98	2	2	12	12	29	30	2	0	41	42	0	0	2
C08604	C21H21O11	53	449.3848	449.1083865	56.1267	4.7102	39.1632	0	0	0	0	71.11	115.2765242	7.298465469	63.67227985	6.304030487	368.7938437	8.888981442	14.51133483	10	8	10	8	6.75464744	-0.429074816	0.387	256	21	44.0119357	116.2575	4256	32	1	32	1	56	4	4	22	23	10	12	1	3	16	18	16	17	2
C08620	C27H31O15	73	595.526	595.1662953	54.4542	5.2468	40.299	0	0	0	0	96.69	130.5514949	8.151681527	91.56027953	7.455795326	495.2696861	10.19625728	16.28991639	14	10	14	10	6.829880018	-1.460176698	-0.6441	256	23	57.08313853	147.1271	4256	1024	1	1024	1	77	5	5	28	29	14	17	2	3	26	29	16	17	2
C08639	C27H31O16	74	611.5254	611.1612099	53.0295	5.1095	41.861	0	0	0	0	114.03	145.4395062	9.026385881	67.43692316	6.325967852	504.6600796	9.315122211	17.08725563	15	11	15	11	7.309366116	-2.81499875	-2.2763	256	25	57.76038404	148.4019	4266	1024	1	1024	1	78	5	5	28	29	15	18	2	3	27	30	16	17	2
C08650	C15H12O4	31	256.2534	256.0735589	70.3056	4.72	24.9743	0	0	0	0	53.18	87.41759663	7.948917606	29.49063457	4.511759082	224.1796283	3.889642659	15.46797434	4	3	5	3	NaN	3.55844296	3.629629344	32	16	27.14318767	72.8197	264	2	2	1	2	32	2	2	12	12	7	8	0	2	7	8	12	12	2
C08725	C27H31O15	73	595.526	595.1662953	54.4542	5.2468	40.299	0	0	0	0	116.33	144.7637015	9.12113659	68.52796979	6.512457733	496.3902683	9.195571363	16.8293914	14	10	14	10	7.509725416	-2.505443364	-1.9919	256	24	57.09350815	146.421	1657	1024	1	1024	1	77	5	5	28	29	14	17	2	3	26	29	16	17	2
C08814	C28H48O6	82	480.6771	480.3450893	69.9637	10.0652	19.9711	0	0	0	0	144.17	130.1537904	9.99121207	58.83246966	4.710420159	491.2774179	7.933168891	19.81175202	5	4	6	4	5.418815418	3.130066732	3.130066885	32	32	52.64235055	130.4066	3	8192	1	8192	1	85	4	4	18	21	16	16	4	0	34	37	0	0	3
C08825	C28H48O	77	400.6801	400.3705162	83.9322	12.0747	3.9931	0	0	0	0	122.53	126.3405706	10.83791536	54.88501793	4.481552627	445.5488959	7.684029897	21.38286813	1	1	1	1	8.952598147	7.477861854	7.477861857	2	2	49.8243515	125.0881	1	512	1	512	1	80	4	4	17	20	12	12	4	0	29	32	0	0	4
C08830	C31H52O	84	440.744	440.4018163	84.478	11.8919	3.6301	0	0	0	0	313.15	128.0608545	9.893539516	56.30571607	4.647934435	487.7015992	8.829630377	19.56648535	1	1	1	1	9.334588487	7.892615144	7.892615146	2	2	54.62376585	135.5093	1	512	1	512	1	88	5	5	18	22	14	14	5	0	32	36	0	0	5
C09243	C13H16N2O	32	216.2789	216.1262631	72.1934	7.4566	7.3976	12.9524	0	0	0	48.4	72.32273896	6.453437368	36.26598021	4.127138458	203.7190519	5.38043785	12.55733842	2	2	2	2	12.70035829	-0.229627441	1.849150028	8	8	26.172484	64.4616	35	2	1	2	1	34	3	3	13	15	3	3	1	2	7	8	9	10	1
C09581	C20H24NO4	49	342.4089	342.1705333	70.1541	7.0648	18.6904	4.0906	0	0	0	104.37	100.4243559	7.037598901	52.74161748	6.10100805	318.241459	6.17999352	13.89852713	4	2	4	2	9.53922885	-1.30599238	-1.383397763	32	32	38.40838557	108.8281	381	2	1	2	1	52	4	4	17	20	8	8	2	2	13	16	12	12	3
C09621	C15H26O	42	222.3663	222.1983655	81.0197	11.7853	7.1951	0	0	0	0	52.34	76.58009722	7.410421474	39.34132656	4.048759114	248.4646679	7.868019441	15.01834867	1	1	1	1	9.934686836	3.911965499	3.911965513	2	2	27.80676129	72.1875	1	4	1	4	1	42	1	1	6	6	10	10	1	0	16	16	0	0	1
C09629	C15H24	39	204.3511	204.1878008	88.1622	11.8377	0	0	0	0	0	93.86	60.82900771	5.336688012	44.71225127	4.391002141	228.8474915	7.502389576	10.3689178	0	0	0	0	NaN	4.519309392	4.519309392	1	1	26.50036225	67.4524	1	8	2	4	1	40	2	2	11	12	4	4	2	0	15	16	0	0	2
C09665	C15H24	39	204.3511	204.1878008	88.1622	11.8377	0	0	0	0	0	51.53	73.11182136	7.298599467	44.0844512	4.269478131	235.5857987	7.828781052	14.59317609	0	0	0	0	NaN	5.138880741	5.138880741	1	1	27.54415172	73.2541	1	4	4	1	1	38	0	0	0	0	15	14	0	0	15	14	0	0	0
C09666	C15H24	39	204.3511	204.1878008	88.1622	11.8377	0	0	0	0	0	47.3	77.59250025	7.668194201	41.13257794	4.124571572	235.8526058	7.606067362	15.03881914	0	0	0	0	NaN	5.196814412	5.196814412	1	1	27.54415172	72.1816	1	2	2	1	1	38	0	0	0	0	15	14	0	0	15	14	0	0	0
C09672	C15H24	39	204.3511	204.1878008	88.1622	11.8377	0	0	0	0	0	72.23	65.30025189	5.341307229	43.58740042	4.496669712	232.3957214	7.553827462	11.04594203	0	0	0	0	NaN	4.777935432	4.777935432	1	1	27.01973684	71.0888	1	4	4	1	1	39	1	1	10	10	5	5	1	0	15	15	0	0	1
C09684	C15H24	39	204.3511	204.1878008	88.1622	11.8377	0	0	0	0	0	60.97	63.30842933	5.40012466	43.50975532	4.334688796	232.7157215	7.618074389	10.27728625	0	0	0	0	NaN	4.878279105	4.878279105	1	1	27.01973684	71.5485	1	8	8	1	1	39	1	1	11	11	4	4	1	0	15	15	0	0	1
C09694	C16H26O3	45	266.3758	266.1881947	72.1429	9.8381	18.019	0	0	0	0	168.06	95.28974283	9.003160809	42.56452416	5.0388678	276.5716207	6.415979369	17.84702014	2	0	3	0	NaN	3.88286426	3.88286426	4	4	30.44261797	78.4587	4	8	4	2	1	45	1	1	3	3	16	16	1	0	19	19	0	0	0
C09699	C15H24	39	204.3511	204.1878008	88.1622	11.8377	0	0	0	0	0	81.18	58.58522553	4.936581417	45.86299644	4.41128639	225.988072	7.37871219	9.687584185	0	0	0	0	NaN	4.159091857	4.159091857	1	1	25.98602793	64.6219	1	16	1	16	1	41	3	3	11	13	4	4	3	0	15	17	0	0	3
C09704	C15H26O	42	222.3663	222.1983655	81.0197	11.7853	7.1951	0	0	0	0	45.12	75.64793046	7.306548734	40.65924903	4.151798145	252.1496896	6.897333067	14.37985797	1	1	1	1	8.577277297	4.307206726	4.307206728	2	2	28.31672206	74.0092	1	4	2	2	1	41	0	0	0	0	16	15	0	0	16	15	0	0	0
C09723	C15H24	39	204.3511	204.1878008	88.1622	11.8377	0	0	0	0	0	52.95	65.88756297	6.09028346	38.75571769	4.199801626	229.6852478	6.503763211	11.86419939	0	0	0	0	NaN	4.577243062	4.577243062	1	1	26.50036225	66.3799	1	8	1	8	1	40	2	2	10	11	5	5	2	0	15	16	0	0	2
C09811	C28H44N7O17P3S	100	875.672	875.1727232	38.4047	5.0646	31.0607	11.1968	10.6114	3.6618	0	247.97	169.9347547	11.82579258	96.87310612	7.027196424	696.1445159	11.02829221	22.59192149	17	9	23	10	2.120196383	-9.590618389	-4.957645988	256	22	76.80536651	194.2861	5000	128	1	128	36	103	4	4	20	21	36	38	2	2	47	49	9	10	1
C09812	C28H46N7O18P3S	103	893.687	893.1832879	37.6306	5.1881	32.2248	10.9711	10.3975	3.5879	0	249.92	174.4073648	11.76935949	92.45268157	6.199839668	712.8786884	12.66565662	23.43318822	18	10	24	11	2.120203975	-10.90515049	-6.272178089	256	25	77.76793481	194.9257	5000	512	1	512	36	106	4	4	20	21	37	39	2	2	48	50	9	10	1
C09813	C28H44N7O18P3S	101	891.671	891.1676379	37.7157	4.9737	32.2977	10.9959	10.421	3.5961	0	252.65	174.3296423	11.68752646	91.77599948	6.170204877	706.4583701	12.56504033	23.25528712	18	9	25	10	2.120196384	-10.3416861	-5.708650383	256	24	77.23994378	194.1034	5000	256	1	256	108	104	4	4	20	21	37	39	2	2	48	50	9	10	1
C09815	C7H7NO	16	121.1366	121.0527639	69.405	5.8245	13.2077	11.5627	0	0	0	20.7	46.1087045	4.743591804	19.29887143	3.445551693	112.3226236	3.4	9.268101317	1	1	2	2	6.651922873	0.823886097	0.82388611	4	4	13.15665246	35.1364	10	1	1	1	2	16	1	1	6	6	3	3	0	1	3	3	6	6	1
C09821	C28H42N7O18P3S	99	889.655	889.1519878	37.8011	4.7584	32.3709	11.0208	10.4446	3.6042	0	262.84	177.3580253	11.69236458	93.53871808	6.925835534	698.5380281	12.57196598	23.0791034	18	9	25	10	2.120196383	-10.25790175	-5.624929349	256	24	76.98576353	194.9793	5000	128	1	128	180	102	4	4	20	21	37	39	2	2	48	50	9	10	1
C09822	C7H12O2	21	128.169	128.0837296	65.5969	9.437	24.9661	0	0	0	0	13.74	42.49467452	4.800247695	27.647333	3.434389664	129.7836845	5.640299239	9.705299665	2	1	3	1	NaN	-0.274466289	1.890156503	2	4	13.42207291	33.8459	3	1	1	1	2	21	1	1	6	6	3	3	1	0	9	9	0	0	1
C09823	C28H46N7O17P3S	102	877.688	877.1883733	38.3165	5.2827	30.9893	11.171	10.5871	3.6533	0	240.81	187.1440097	12.94160411	103.0172035	7.576371233	703.8489822	13.21688311	25.9258633	17	9	23	10	2.120196387	-9.674339423	-5.041367022	256	23	77.06011775	193.4102	5000	128	1	128	36	105	4	4	20	21	36	38	2	2	47	49	9	10	1
C09844	C10H18O	29	154.2493	154.1357652	77.8655	11.7621	10.3724	0	0	0	0	46.08	45.87537561	4.364054119	38.31170154	3.893581975	168.974442	7.365323951	8.393167353	1	0	1	0	NaN	2.348419606	2.348419606	2	2	18.38576391	45.8609	1	2	1	2	1	30	2	2	8	9	3	3	2	0	11	12	0	0	0
C09848	C10H18O	29	154.2493	154.1357652	77.8655	11.7621	10.3724	0	0	0	0	26.9	56.84873068	5.889101365	33.84132129	3.864401047	175.911681	6.741006164	11.2772105	1	0	2	0	NaN	2.709875916	2.709875917	4	1	18.9974	49.2974	2	2	1	2	2	28	0	0	0	0	11	10	0	0	11	10	0	0	0
C09880	C10H16	26	136.234	136.1252005	88.1623	11.8377	0	0	0	0	0	87.69	43.74244439	4.593270265	35.60473081	3.714827882	151.9973207	7.226590878	9.141409764	0	0	0	0	NaN	2.801661446	2.801661446	1	4	17.49504337	44.7223	1	4	1	4	1	27	2	2	7	8	3	3	2	0	10	11	0	0	2
C09884	C10H14O	25	150.2176	150.1044651	79.9553	9.3938	10.6508	0	0	0	0	85.39	45.39913116	4.450353753	34.82528128	3.6527842	154.3526965	7.321753724	8.902562972	1	0	2	0	7.873893961	2.192311755	2.192311755	2	4	17.52459102	44.343	3	4	1	4	2	26	2	2	7	8	4	4	2	0	11	12	0	0	2
C10138	C8H15N	24	125.2114	125.1204495	76.7387	12.0749	0	11.1864	0	0	0	20.76	46.59282397	5.183752224	28.42349842	3.322413141	140.7445817	6.097766533	10.3741191	1	0	1	0	NaN	0.951749094	2.159293528	2	2	15.47804366	39.8728	2	1	1	1	3	24	1	1	6	6	3	3	1	0	9	9	0	0	0
C10443	C21H20O6	47	368.3799	368.1259884	68.4686	5.4723	26.0591	0	0	0	0	80.71	121.5514431	10.04146426	40.77248153	5.226671381	328.9114636	5.928570874	20.0888711	6	3	7	3	1.719733507	3.714437943	3.759039357	64	128	39.17474215	106.1263	4999	8	8	1	6	48	2	2	12	12	15	16	0	2	15	16	12	12	2
C10462	C17H26O4	47	294.3859	294.1831093	69.3586	8.9021	21.7394	0	0	0	0	41.3	99.85877125	9.158739583	48.94590737	5.130049678	297.1229397	6.820238858	18.09410996	4	2	5	2	3.584001436	3.616031372	3.616519811	64	32	32.55724594	83.1092	28	2	1	2	3	47	1	1	6	6	15	15	0	1	15	15	6	6	1
C10700	C8H8O2	18	136.1479	136.0524295	70.5744	5.9226	23.503	0	0	0	0	21.76	48.52639864	5.152440997	22.59459764	3.323081446	126.6427872	4.171584194	10.22258377	2	1	3	1	NaN	1.16218959	1.227328013	8	4	14.66400342	38.4417	11	1	1	1	2	18	1	1	6	6	4	4	0	1	4	4	6	6	1
C10858	C9H15NO3	28	185.2203	185.1051934	58.3609	8.1628	25.9141	7.5622	0	0	0	38.03	50.07768865	4.771565656	35.58056783	3.875493608	174.4060252	6.591264322	9.551886993	4	2	5	2	6.801537352	-3.220812285	-3.220812285	16	16	18.56058724	46.5693	3	16	1	16	2	29	2	2	8	9	5	5	2	0	13	14	0	0	0
C10945	C9H8O3	20	164.158	164.0473441	65.8489	4.912	29.239	0	0	0	0	28.05	56.5131373	5.92191916	26.03480515	3.791546506	144.5574561	3.832047271	11.7032061	3	2	4	2	2.305107387	1.366141496	1.370339364	8	16	16.97110263	46.0963	72	2	2	1	2	20	1	1	6	6	6	6	0	1	6	6	6	6	1
C11036	C6H5Br	12	157.008	155.9574628	45.8984	3.2098	0	0	0	0	50.8917	11.73	40.17811296	4.375166551	18.94512413	3.401526594	100.2673351	3.55	8.726897948	0	0	0	0	NaN	2.741998441	2.741998441	1	1	13.09029406	33.6808	1	1	1	1	1	12	1	1	6	6	1	1	0	1	1	1	6	6	1
C11062	C25H42N7O18P3S	96	853.623	853.1519878	35.1757	4.9593	33.7373	11.486	10.8855	3.7563	0	245.97	173.4157285	11.83241893	91.91441153	6.152630753	673.3572932	12.55654758	23.495216	18	10	24	11	2.120220895	-12.07941575	-7.446443344	256	25	73.04915153	183.3646	5000	128	1	128	36	98	3	3	14	15	40	41	1	2	45	46	9	10	0
C11088	C2H4Br2	8	187.861	185.8679754	12.7868	2.1461	0	0	0	0	85.0672	0.74	30.22443373	4.160960251	18.94854409	2.733957806	81.97642948	4.919972091	8.263569996	0	0	0	0	NaN	1.871495157	1.871495157	1	1	10.46590917	26.6226	1	1	1	1	1	7	0	0	0	0	4	3	0	0	4	3	0	0	0
C11130	C8H7NO2	18	149.1467	149.0476785	64.4236	4.7306	21.4546	9.3912	0	0	0	26.46	48.25413597	4.75935815	27.10505762	3.968093997	126.1418481	5.209862653	9.47901328	2	2	3	2	3.920228076	0.356886144	0.356891726	16	8	15.10415528	40.9231	14	2	1	2	3	19	2	2	9	10	2	2	1	1	5	6	6	6	1
C11148	C2HCl3O	7	147.388	145.9092978	16.2981	0.6839	10.8553	0	0	0	72.1626	119.45	33.4265489	3.950197027	21.82644019	3.199315414	84.92561378	5.005051885	7.672190653	1	0	1	0	NaN	2.044070469	2.044070469	2	4	10.28929847	25.8457	1	2	1	2	1	7	1	1	3	3	3	3	1	0	6	6	0	0	0
C11150	C2HCl3O2	8	163.387	161.9042124	14.7021	0.6169	19.5847	0	0	0	65.0964	2.34	31.96787782	3.852426008	24.97420866	3.177397327	98.15529057	6.142401061	7.269900513	2	1	3	1	NaN	-1.992857698	1.529042711	2	2	10.98023069	28.1583	3	1	1	1	1	7	0	0	0	0	7	6	0	0	7	6	0	0	0
C11348	C8H10O	19	122.1644	122.0731649	78.6527	8.2507	13.0966	0	0	0	0	18.12	45.00822303	4.755756482	25.49269945	3.393075633	124.5462826	5.376439052	9.39220291	1	1	1	1	5.968094836	1.622471067	1.622471073	2	2	14.63980611	37.2927	1	2	1	2	1	19	1	1	6	6	3	3	0	1	3	3	6	6	1
C11355	C10H11NO5	27	225.198	225.0637225	53.334	4.9234	35.523	6.2197	0	0	0	38.59	63.80450372	6.247339721	33.21304189	4.211316718	189.8452851	6.693450134	12.34764374	6	3	8	4	3.584395725	-5.785826603	-3.221019374	16	8	21.05613319	55.9676	49	4	1	4	4	27	1	1	6	6	10	10	1	0	16	16	0	0	1
C11356	C20H36O7P2	65	450.4432	450.1936265	53.3284	8.0556	24.8635	0	13.7526	0	0	151.55	122.84205	10.00181013	74.94347836	6.068832985	418.6477283	9.523250829	20.49299954	5	3	7	3	NaN	0.395185006	5.276447336	8	8	45.93698387	120.5331	17	16	8	2	1	64	0	0	0	0	29	28	0	0	29	28	0	0	0
C11383	C10H14O	25	150.2176	150.1044651	79.9553	9.3938	10.6508	0	0	0	0	33.59	50.94213799	5.275671434	31.29918014	3.526161657	156.9256447	6.488324349	10.35231543	1	0	2	0	8.144086629	2.55252929	2.55252929	2	4	18.02367239	47.1735	3	2	1	2	5	25	1	1	6	6	5	5	1	0	11	11	0	0	1
C11384	C10H18O	29	154.2493	154.1357652	77.8655	11.7621	10.3724	0	0	0	0	26.92	56.73626254	5.960819633	32.96453309	3.590751682	175.839634	6.493642715	11.50482205	1	0	2	0	NaN	2.709875916	2.709875917	4	4	18.9974	49.2974	2	2	1	2	2	28	0	0	0	0	11	10	0	0	11	10	0	0	0
C11393	C10H18O	29	154.2493	154.1357652	77.8655	11.7621	10.3724	0	0	0	0	32.11	55.88228485	5.425059199	30.35917758	3.413410065	171.146151	6.108034703	10.60797269	1	1	1	1	9.266071609	2.174297503	2.174297508	2	2	18.80986512	48.4619	1	2	1	2	1	29	1	1	6	6	5	5	1	0	11	11	0	0	1
C11398	C10H16O	27	152.2334	152.1201151	78.8966	10.5936	10.5098	0	0	0	0	26.87	51.86918964	5.457028434	30.32372092	3.558560922	164.7956628	6.174726962	10.9238169	1	0	2	0	NaN	2.70214159	2.70214159	2	4	18.25974876	46.2976	2	4	1	4	3	27	1	1	6	6	5	5	1	0	11	11	0	0	1
C11412	C10H16O	27	152.2334	152.1201151	78.8966	10.5936	10.5098	0	0	0	0	31.29	49.09545345	4.775416324	34.41737453	3.760618968	165.025822	6.852958404	9.266750825	1	0	2	0	NaN	2.70214159	2.70214159	2	4	18.25974876	46.2976	2	4	1	4	3	27	1	1	6	6	5	5	1	0	11	11	0	0	1
C11422	C14H10	24	178.2292	178.0782503	94.3447	5.6553	0	0	0	0	0	41.9	66.58960369	5.798314698	22.88126176	4.071965008	168.4832686	3.4	11.5588203	0	0	0	0	NaN	3.952199329	3.952199329	1	1	25.77397665	58.9584	1	1	1	1	1	26	3	3	14	16	0	0	0	3	0	0	14	16	3
C11427	C11H8O2	21	172.18	172.0524295	76.7323	4.6832	18.5845	0	0	0	0	32.37	58.88226438	5.555514305	22.6859034	3.933491922	153.0025982	4.197114416	11.06519416	2	1	3	1	NaN	2.981773497	3.021659596	4	2	20.36976986	51.0731	62	1	1	1	1	22	2	2	10	11	3	3	0	2	3	3	10	11	2
C11428	C14H12O2	28	212.2439	212.0837296	79.2248	5.6988	15.0764	0	0	0	0	47.74	68.14825938	5.78910569	32.31835052	4.500043709	192.7160995	5.954754567	11.469225	2	2	2	2	4.980720799	2.033780522	2.03378084	4	4	25.50614515	62.1974	1	3	1	3	1	30	3	3	14	16	2	2	1	2	4	6	12	12	3
C11429	C14H10O	25	194.2286	194.0731649	86.5731	5.1895	8.2374	0	0	0	0	157.01	67.36241187	5.816734052	26.21758989	4.197147559	172.6696736	4.436690497	11.56599767	1	0	1	0	NaN	3.195484412	3.195484412	2	2	24.28670769	58.6873	1	3	1	3	1	28	4	4	15	18	0	0	2	2	3	6	12	12	3
C11432	C14H10O	25	194.2286	194.0731649	86.5731	5.1895	8.2374	0	0	0	0	44.79	68.78549166	5.799210177	25.79232252	4.092618676	176.9954553	3.80511614	11.49710855	1	1	1	1	NaN	3.647462984	3.648634008	2	2	26.21264223	60.9393	94	1	1	1	1	27	3	3	14	16	1	1	0	3	1	1	14	16	3
C11433	C15H12O	28	208.2552	208.088815	86.5095	5.8079	7.6826	0	0	0	0	48.46	72.80673099	6.119627658	29.81701969	4.269546013	194.5485009	4.92406827	11.78452883	1	0	1	0	NaN	3.794528064	3.794528064	2	2	28.1346536	65.4216	94	1	1	1	1	30	3	3	14	16	2	2	0	3	2	2	14	16	3
C11455	C29H46O	76	410.6749	410.3548661	84.8141	11.29	3.8959	0	0	0	0	141.47	115.7593425	9.682360854	54.5724088	4.473374089	446.7184346	9.968215842	19.81980987	1	1	1	1	9.38318024	7.001045914	7.00104592	2	2	51.20337853	130.9196	1	64	1	64	1	79	4	4	17	20	13	13	4	0	30	33	0	0	4
C11457	C9H10O3	22	166.1739	166.0629942	65.0501	6.0656	28.8843	0	0	0	0	20.93	55.44024346	5.824953029	27.34885573	3.65236693	152.0467511	5.298865092	11.21369349	3	2	4	2	NaN	-0.963628793	1.751997449	4	8	16.98328327	43.9475	21	1	1	1	2	22	1	1	6	6	6	6	0	1	6	6	6	6	1
C11472	C7H16O13P2	38	370.1417	370.0066136	22.7142	4.357	56.1926	0	16.7362	0	0	104.67	81.88492512	6.251566732	51.78144647	5.521057365	269.9343314	8.199171369	11.20606587	11	8	13	8	NaN	-10.00031405	-3.810006223	256	15	26.97600533	63.6317	16	64	1	64	1	38	1	1	6	6	16	16	1	0	22	22	0	0	0
C11508	C29H46O	76	410.6749	410.3548661	84.8141	11.29	3.8959	0	0	0	0	128.06	126.6698598	10.31168074	55.18885094	4.609748695	446.6364275	6.765191259	20.40222706	1	1	1	1	8.952341043	6.967997833	6.967997836	2	2	51.20337853	129.9976	1	128	1	128	1	79	4	4	17	20	13	13	4	0	30	33	0	0	4
C11509	C29H48O2	79	428.6902	428.3654308	81.2499	11.2858	7.4643	0	0	0	0	128.68	127.7226143	10.80237471	52.72181443	5.174749513	465.1454104	7.561706972	21.23186781	2	1	3	1	5.773872311	6.888939041	6.888939054	4	4	51.70549842	130.278	2	512	1	512	1	82	4	4	17	20	14	14	4	0	31	34	0	0	4
C11519	C7H13NO	22	127.1842	127.099714	66.1048	10.3026	12.5797	11.0129	0	0	0	15.44	44.71738797	4.821030798	28.12755135	3.527409373	132.8161363	5.915501054	9.693651749	1	1	2	1	8.272160487	0.943959507	0.943959561	4	4	14.10309143	35.8863	3	1	1	1	2	22	1	1	6	6	3	3	1	0	9	9	0	0	1
C11555	C6H16O18P4	44	500.0755	499.9287098	14.4107	3.2249	57.5891	0	24.7753	0	0	204.53	94.01669307	6.735849034	54.43998874	5.390296002	333.7746948	7.512801975	13.31350813	14	10	18	10	NaN	-18.05356845	-4.276273777	256	15	33.802596	79.2666	256	36	1	36	1	44	1	1	6	6	22	22	1	0	28	28	0	0	1
C11713	C10H8O	19	144.1699	144.0575149	83.3093	5.5931	11.0976	0	0	0	0	26.88	52.3519054	5.062786449	24.17094924	3.791934515	133.6483137	4.149095851	9.558747753	1	1	1	1	NaN	2.658446704	2.659157251	2	2	18.54537839	44.4891	26	1	1	1	1	20	2	2	10	11	1	1	0	2	1	1	10	11	2
C11785	C16H17NO3	37	271.3111	271.1208434	70.8306	6.3156	17.6912	5.1626	0	0	0	66.13	64.21547506	5.383240835	48.38054516	4.742269529	237.9741607	7.926606728	9.30082119	4	3	4	3	10.12579597	-2.032171132	0.236353247	16	16	28.86012124	74.8277	14	32	1	32	1	41	5	5	18	22	2	2	4	1	14	18	6	6	3
C11907	C16H24N2O15P2	59	546.3137	546.0651911	35.176	4.428	43.9292	5.1277	11.3392	0	0	160.64	118.1976136	8.17776228	67.16878234	5.458098693	415.8753714	9.55106623	16.28975657	12	6	17	6	NaN	-6.777176335	-2.038333385	256	15	44.05866056	106.9918	704	512	1	512	21	61	3	3	17	17	18	20	2	1	29	31	6	6	0
C11908	C16H24N2O15P2	59	546.3137	546.0651911	35.176	4.428	43.9292	5.1277	11.3392	0	0	157.32	103.0304168	7.462630788	73.22849482	5.738079765	415.9896964	10.9293384	13.28126195	12	6	17	6	NaN	-6.777132458	-2.038333385	256	15	44.05866056	106.9918	704	512	1	512	21	61	3	3	17	17	18	20	2	1	29	31	6	6	0
C11911	C18H31N3O13P2	67	559.3986	559.1332111	38.6473	5.5857	37.1814	7.5117	11.074	0	0	178.2	123.041512	9.227829528	66.26568238	5.39704209	452.926974	10.31063975	18.64733579	11	5	15	5	2.32949432	-3.117731206	-3.574317257	256	13	48.24927348	118.3882	352	512	1	512	3	69	3	3	17	17	19	21	2	1	30	32	6	6	0
C11916	C17H28N2O14P2	63	546.3567	546.1015766	37.3715	5.1655	40.9973	5.1273	11.3383	0	0	163.25	106.988809	7.568427752	75.14110044	5.829284161	431.054467	12.30106594	14.39375223	11	6	15	6	NaN	-6.210805312	-1.472294828	256	13	45.64806853	110.886	352	512	1	512	3	65	3	3	17	17	18	20	2	1	29	31	6	6	0
C11923	C16H26N2O14P2	60	532.3302	532.0859266	36.1	4.923	42.0776	5.2624	11.637	0	0	155.73	105.2658601	7.329303066	76.99015302	5.867007865	413.8766916	10.37326336	12.62768549	11	6	15	6	NaN	-6.491380846	-1.752871497	256	13	43.85501099	106.2478	352	512	1	512	3	62	3	3	17	17	17	19	2	1	28	30	6	6	0
C11924	C10H14O2	26	166.217	166.0993797	72.2592	8.4896	19.2512	0	0	0	0	33.6	54.26978514	5.962596615	28.9566479	3.372898759	165.6165391	6.398023405	11.96047756	2	1	3	1	NaN	0.411606024	2.411505251	2	2	18.44526151	48.1975	4	2	1	2	3	26	1	1	6	6	6	6	1	0	12	12	0	0	1
C11938	C10H16O	27	152.2334	152.1201151	78.8966	10.5936	10.5098	0	0	0	0	87.44	46.97738158	4.629669776	35.82546162	3.952386483	160.5651432	7.115198	9.154701137	1	1	1	1	7.598138872	1.520890289	1.52089029	2	2	18.07372971	46.497	1	4	1	4	1	28	2	2	7	8	4	4	2	0	11	12	0	0	2
C11939	C10H14O	25	150.2176	150.1044651	79.9553	9.3938	10.6508	0	0	0	0	87.62	46.00780107	4.527089286	36.29096529	4.064594448	154.3005734	7.129966165	8.660824018	1	0	2	0	NaN	1.834737793	1.834737793	2	4	17.52459102	45.5141	3	4	1	4	3	26	2	2	7	8	4	4	2	0	11	12	0	0	2
C11940	C10H14O2	26	166.217	166.0993797	72.2592	8.4896	19.2512	0	0	0	0	88.3	49.37267788	5.080211759	36.95702497	3.791736984	162.7704628	7.17367401	10.18986204	2	1	3	1	NaN	-0.149629837	1.993354045	2	2	17.96314738	46.4395	4	4	1	4	3	27	2	2	7	8	5	5	2	0	12	13	0	0	2
C11941	C10H16O	27	152.2334	152.1201151	78.8966	10.5936	10.5098	0	0	0	0	85.56	46.71653975	4.54377855	35.08434617	3.84836134	160.7243489	7.034692054	9.040822312	1	1	1	1	8.207694052	1.628784049	1.62878405	2	2	18.07372971	45.1653	1	8	1	8	1	28	2	2	7	8	4	4	2	0	11	12	0	0	2
C11942	C10H16O	27	152.2334	152.1201151	78.8966	10.5936	10.5098	0	0	0	0	30.43	50.28269181	5.003948824	34.10349831	3.889791477	168.4330738	6.822404571	9.638032912	1	0	2	0	NaN	2.716614901	2.716614901	2	4	18.76297619	49.0743	3	2	2	1	3	26	0	0	0	0	11	10	0	0	11	10	0	0	0
C11943	C10H16O2	28	168.2328	168.1150298	71.3933	9.5861	19.0205	0	0	0	0	31.25	54.65402752	5.382734078	35.42035399	3.79376863	177.0583712	6.477220917	10.64613988	2	1	3	1	NaN	1.081548487	2.875231153	2	2	19.17391304	49.9997	4	2	2	1	3	27	0	0	0	0	12	11	0	0	12	11	0	0	0
C11944	C10H16O2	28	168.2328	168.1150298	71.3933	9.5861	19.0205	0	0	0	0	32.47	51.88778642	5.087878031	36.66330355	3.962505776	176.828864	7.058349309	10.15999937	2	1	3	1	NaN	1.081548487	2.875231153	2	2	19.17391304	49.9997	4	2	2	1	3	27	0	0	0	0	12	11	0	0	12	11	0	0	0
C12095	C30H27O13	70	595.5276	595.145166	60.5045	4.5698	34.9257	0	0	0	0	143.48	144.5451661	8.744732546	68.57763631	6.465201586	495.9162666	9.848289175	17.5184595	11	8	12	8	6.748386227	2.982898813	3.8007	256	22	59.68446312	157.8061	4279	64	2	32	1	74	5	5	28	29	15	18	1	4	21	24	22	23	3
C12096	C36H37O18	91	757.6682	757.1979894	57.0679	4.9222	38.0099	0	0	0	0	126.33	155.4618238	8.79861377	91.62864087	6.41136754	629.8393913	10.0395588	17.10599193	16	11	17	11	7.300819165	0.59697525	1.1374	256	26	73.40358995	189.9505	4279	2048	2	1024	1	96	6	6	34	35	20	24	2	4	32	36	22	23	3
C12137	C21H21O10	52	433.3854	433.1134719	58.1987	4.884	36.9173	0	0	0	0	73.3	113.4021345	7.246647847	62.51420104	6.988688517	360.2789106	8.862652006	13.75709594	9	7	9	7	6.821024739	-0.117820622	0.6714	256	20	43.36277431	114.2766	1655	32	1	32	1	55	4	4	22	23	9	11	1	3	15	17	16	17	2
C12138	C21H21O12	54	465.3842	465.1033011	54.1971	4.5482	41.2547	0	0	0	0	72.38	115.7736392	7.243555254	66.26914235	6.771678513	377.2581341	8.60797009	14.02789261	11	9	11	9	6.663792003	-0.78328208	0.1026	256	22	44.66953016	118.2384	3057	32	1	32	1	57	4	4	22	23	11	13	1	3	17	19	16	17	2
C12173	C16H19NO3	39	273.327	273.1364935	70.3082	7.0066	17.5607	5.1245	0	0	0	67.96	76.97480752	5.88509362	49.37517328	5.320948044	249.5498533	7.203463449	9.752787291	4	2	4	2	12.17644708	-1.695542891	0.779994866	16	16	29.80673156	77.0102	14	8	1	8	1	42	4	4	17	20	3	3	3	1	14	17	6	6	2
C12204	C10H10O4	24	194.184	194.0579088	61.8522	5.1906	32.9572	0	0	0	0	33.87	63.7671586	6.316781941	30.8348281	4.193846445	170.6632139	5.014783401	12.54705296	4	2	5	2	2.519474852	1.210721716	1.212668099	16	64	19.5118503	52.5595	123	2	2	1	2	24	1	1	6	6	8	8	0	1	8	8	6	6	1
C12205	C10H12O4	26	196.1999	196.0735589	61.2166	6.1648	32.6186	0	0	0	0	34.4	63.81219871	6.170161373	33.7887236	4.28703519	176.9842872	5.251924515	12.17420523	4	3	4	3	3.47762889	1.049554984	1.051009813	16	16	20.05396004	53.6175	46	2	2	1	1	26	1	1	6	6	8	8	0	1	8	8	6	6	1
C12213	C6H14NO8P	30	259.151	259.0457029	27.8078	5.4451	49.3902	5.4048	11.952	0	0	59.3	66.56113737	6.025942926	34.75093994	4.410647578	202.5394798	5.678002772	12.17347815	8	6	9	7	3.571428831	-5.088299204	-5.043604863	128	128	20.56254356	48.4538	4	32	1	32	1	30	1	1	6	6	10	10	1	0	16	16	0	0	0
C12214	C6H14NO8P	30	259.151	259.0457029	27.8078	5.4451	49.3902	5.4048	11.952	0	0	61.52	64.78921262	5.867662457	38.63270031	4.505174659	202.1198352	6.622401003	11.44556527	8	6	9	7	3.568292494	-4.932810984	-4.869076105	128	128	20.56254356	48.8912	4	16	1	16	1	30	1	1	5	5	11	11	1	0	16	16	0	0	0
C12215	C4H10NO6P	22	199.0991	199.0245736	24.1301	5.0625	48.2154	7.035	15.557	0	0	51.53	49.29356476	5.367211928	28.45267804	3.355693359	154.7585445	6.556148091	10.4210252	6	5	7	5	3.775112895	-4.734297239	-4.681717519	64	64	15.41232015	48.7655	8	4	1	4	6	21	0	0	0	0	12	11	0	0	12	11	0	0	0
C12312	C8H7NO	17	133.1473	133.0527639	72.1649	5.2991	12.0163	10.5197	0	0	0	26.38	46.3394226	4.757035911	23.19280174	3.652170815	117.5166309	4.196733641	9.442309207	1	1	2	1	NaN	1.072049945	1.072050187	8	4	14.47236998	39.5849	14	1	1	1	3	18	2	2	9	10	1	1	1	1	4	5	6	6	1
C12371	C23H18O8	49	422.3842	422.1001676	65.4016	4.2954	30.303	0	0	0	0	99.73	122.73025	9.747734601	40.6982466	4.414521306	354.5914315	6.641887191	19.42981926	7	2	10	2	2.495476627	4.797175638	4.80260801	128	16	43.27196689	111.5559	5000	1	1	1	1	52	4	4	18	21	13	13	1	3	15	17	16	17	4
C12383	C21H18O9	48	414.3622	414.0950822	60.8706	4.3785	34.7509	0	0	0	0	96.37	97.87345571	7.829040433	58.14252239	4.950841361	340.8900502	8.925195828	15.48210259	9	5	12	5	NaN	-1.468859212	1.626284873	256	128	40.43503609	104.0376	2223	8	1	8	12	51	4	4	18	21	12	12	2	2	20	22	10	11	4
C12384	C27H28O12	67	544.504	544.1580764	59.5568	5.1831	35.2601	0	0	0	0	162.31	117.4248576	8.323087169	78.33878666	6.304367132	460.6017953	11.1727354	16.90485829	12	6	15	6	0.424104506	-1.236786338	1.802997257	256	16	52.83297784	133.3965	2223	128	1	128	24	71	5	5	24	27	15	16	3	2	29	32	10	11	4
C12406	C37H44O13	94	696.7375	696.2781915	63.7824	6.3653	29.8523	0	0	0	0	145.28	178.5818462	13.10291607	88.21268865	7.369184424	617.7039674	9.589284621	25.87794186	13	5	16	5	2.971269268	2.654013325	2.664746482	256	15	69.50043898	175.9557	1349	4096	1	4096	3	100	7	7	36	39	14	17	5	2	38	44	12	12	4
C12413	C43H56O17	116	844.8945	844.3517504	61.1272	6.6807	32.1922	0	0	0	0	177.2	178.9827405	12.0477396	116.1785129	8.374148805	749.5124087	13.49226926	23.2280011	17	7	20	7	3.263389228	1.076543937	1.080930507	256	19	82.53650628	208.2556	480	ERROR	ERROR	ERROR	2	123	8	8	42	45	18	22	7	1	54	61	6	6	4
C12414	C37H46O14	97	714.7527	714.2887562	62.1748	6.4869	31.3383	0	0	0	0	155.82	165.3305744	9.467928423	93.60965192	7.431177735	631.578346	9.851081578	17.45706134	14	6	17	6	3.361037784	0.899831832	0.904218123	256	18	70.13573492	178.8967	480	8192	1	8192	2	103	7	7	36	39	15	18	6	1	45	51	6	6	4
C12448	C10H17NO3	31	199.2469	199.1208434	60.2805	8.5999	24.0898	7.0298	0	0	0	40.04	55.01548039	5.280315158	39.03038061	4.186837746	191.958654	6.69074284	10.48316418	3	1	4	1	11.82394474	-2.241698936	-0.21319184	8	8	20.63339293	51.3384	3	16	1	16	1	32	2	2	8	9	6	6	2	0	14	15	0	0	0
C12449	C9H15NO3	28	185.2203	185.1051934	58.3609	8.1628	25.9141	7.5622	0	0	0	37.22	49.14038523	4.835933911	38.48756352	4.118143344	174.40737	6.617616865	9.415822955	4	2	5	2	6.801537352	-3.220812285	-3.220812285	16	16	18.56058724	46.5693	3	16	1	16	2	29	2	2	8	9	5	5	2	0	13	14	0	0	0
C12621	C9H8O3	20	164.158	164.0473441	65.8489	4.912	29.239	0	0	0	0	26.9	57.41632851	5.784016639	27.22093618	3.843210748	144.6243426	3.842240319	11.18299699	3	2	4	2	NaN	-1.045508935	1.832520938	4	4	16.80770544	45.0408	74	2	2	1	2	20	1	1	6	6	6	6	0	1	6	6	6	6	1
C12623	C9H8O4	21	180.1574	180.0422587	60.001	4.4758	35.5232	0	0	0	0	30.29	59.56334006	5.73885161	26.69560787	4.370252882	153.1389936	4.27103661	11.38711499	4	3	5	3	NaN	-1.588239997	1.528955617	8	16	17.45421768	47.0217	108	2	2	1	2	21	1	1	6	6	7	7	0	1	7	7	6	6	1
C12640	C36H37O18	91	757.6682	757.1979894	57.0679	4.9222	38.0099	0	0	0	0	123.35	158.2064844	8.946905076	89.85969506	6.43752911	629.9229349	9.876470893	17.52312452	16	11	17	11	7.438632477	0.621186413	1.1374	256	26	73.40252076	189.9505	4070	2048	2	1024	1	96	6	6	34	35	20	24	2	4	32	36	22	23	3
C12647	C42H41O24	107	929.7605	929.1987772	54.2558	4.4448	41.2994	0	0	0	0	151.48	181.178319	10.27263763	110.719977	7.262152653	757.9368217	12.84833539	20.57493828	20	11	25	11	3.108808064	-5.634072927	1.7144	256	29	86.06444447	220.9417	4380	2048	2	1024	4	112	6	6	34	35	32	36	2	4	44	48	22	23	3
C12673	C8H9FN2O3	23	200.1671	200.0597204	48.0027	4.5319	23.9791	13.995	0	0	9.4913	37.36	56.83392232	5.449038529	30.55281315	4.086814835	159.7377372	5.559531207	10.88176873	3	1	5	1	1.709605123	-0.057740439	0.023826538	8	4	16.84535466	44.5014	16	2	1	2	3	24	2	2	11	11	3	4	1	1	8	9	6	6	0
C12837	C6H7ClO2	16	146.572	146.0134572	49.1664	4.8137	21.8315	0	0	0	24.1881	19.57	41.63791179	4.190438227	28.31253172	3.763186759	117.8214285	5.901142255	8.226076559	2	2	2	2	4.748388247	0.030523696	0.030524562	4	4	13.7036368	37.2784	1	4	1	4	1	16	1	1	6	6	3	3	1	0	9	9	0	0	1
C12838	C6H4O4	14	140.0936	140.0109586	51.44	2.8779	45.682	0	0	0	0	40.88	44.27453297	4.744532853	20.5585552	3.436121103	107.708447	3.902968463	9.394878733	3	1	5	1	NaN	-3.202686483	0.182959787	4	8	11.99846756	33.3257	34	2	2	1	2	14	1	1	5	5	5	5	1	0	10	10	0	0	0
C12986	C8H13NO5	27	203.1925	203.0793725	47.288	6.4487	39.3701	6.8933	0	0	0	19.15	60.90805029	6.543690071	34.31280326	4.226483197	182.490017	6.149864804	13.11285806	5	3	8	3	1.142618388	-6.445175865	-0.668446752	32	64	17.93244504	45.3325	27	2	1	2	42	26	0	0	0	0	14	13	0	0	14	13	0	0	0
C12987	C8H14NO8P	32	283.1724	283.0457029	33.9318	4.9832	45.2005	4.9464	10.9381	0	0	60.93	71.90351812	7.381173236	38.2016239	4.26830102	227.2886799	6.274745107	14.8689704	7	4	11	4	0.028549328	-7.55266316	-1.322311897	128	128	22.68899124	56.4922	81	2	1	2	21	31	0	0	0	0	18	17	0	0	18	17	0	0	0
C12988	C8H13NO4	26	187.1931	187.0844579	51.3297	6.9998	34.188	7.4825	0	0	0	18.47	58.56860491	6.240660447	34.27439911	4.341993765	174.0127392	5.964595077	12.4345944	4	2	7	2	1.341627562	-3.838073872	-0.827063004	64	64	17.39557264	44.4071	18	2	1	2	42	25	0	0	0	0	13	12	0	0	13	12	0	0	0
C12989	C9H17NO3	30	187.2362	187.1208434	57.7326	9.1515	25.6351	7.4808	0	0	0	17.4	61.95003949	6.345781523	39.87966701	4.71374256	189.1022044	7.150270568	12.84781271	4	2	6	3	7.110044951	-2.767639992	-2.767639992	32	32	19.44738671	49.0518	6	2	1	2	13	29	0	0	0	0	13	12	0	0	13	12	0	0	0
C13309	C30H44O2	76	436.6692	436.3341307	82.5158	10.1563	7.3279	0	0	0	0	102.36	140.8293138	11.40303061	62.71311819	5.667729681	468.4956551	9.119415591	22.53704349	2	0	4	0	NaN	9.300893952	9.300895319	8	4	53.49126277	138.5997	59	8	2	4	7	77	2	2	10	11	22	22	1	1	26	27	6	6	2
C13378	C14H22N4O9P2S	52	484.358	484.058272	34.716	4.5782	29.729	11.5672	12.7896	6.6201	0	142.18	107.3275545	8.520002474	63.35572543	6.219096061	377.3286065	8.260750636	16.6624726	10	6	12	7	4.16798884	-9.276389226	-8.235328777	256	256	40.97417339	118.7968	3360	2	1	2	3	53	2	2	11	11	19	20	0	2	19	20	11	11	0
C13425	C37H54O3	94	546.8229	546.4072956	81.2687	9.9536	8.7776	0	0	0	0	127.78	183.4798848	36.33705726	96.9808301	17.95260646	602.7588315	26.44583518	74.23060426	3	2	4	2	NaN	8.75410962	11.35440178	4	4	67.15394618	178.5509	23	32	32	1	1	94	1	1	6	6	34	34	0	1	34	34	6	6	1
C13624	C15H16O2	33	228.2863	228.1150298	78.9187	7.0644	14.017	0	0	0	0	56.67	65.4709672	6.139471481	44.10939482	4.531135849	221.576936	7.298956579	12.21947007	2	2	2	2	NaN	4.044258021	4.044975416	4	4	26.58856501	79.2751	15	1	1	1	1	34	2	2	12	12	5	6	0	2	5	6	12	12	2
C13629	C15H16O3	34	244.2857	244.1099444	73.7499	6.6017	19.6484	0	0	0	0	46.23	74.04733314	7.637927082	34.43339705	3.710205114	229.5898159	6.824774727	15.15543958	3	3	3	3	3.083249355	2.950481697	2.952243466	8	8	27.18786783	70.5117	25	2	1	2	1	35	2	2	12	12	6	7	0	2	6	7	12	12	2
C13631	C15H16O3	34	244.2857	244.1099444	73.7499	6.6017	19.6484	0	0	0	0	50.04	69.78753304	5.872247784	44.4407566	4.526568728	229.917844	7.407033927	12.39873979	3	3	3	3	3.363269399	2.763311669	2.764204259	8	8	27.18786804	81.0498	15	1	1	1	1	35	2	2	12	12	6	7	0	2	6	7	12	12	2
C13632	C15H14O2	31	226.2705	226.0993797	79.6217	6.2364	14.1418	0	0	0	0	54.03	78.29462526	7.520024929	32.50852831	3.698142977	212.750176	5.701365553	14.75842404	2	2	2	2	NaN	4.002428713	4.005350813	4	4	26.58487044	69.7566	93	2	2	1	1	32	2	2	12	12	5	6	0	2	5	6	12	12	2
C13633	C15H14O4	33	258.2693	258.0892089	69.7568	5.4637	24.7794	0	0	0	0	73.39	66.59613904	6.275097281	52.89821689	4.968622885	232.5424074	9.070965331	12.25655572	4	3	5	3	NaN	0.210556471	3.236668015	8	8	27.16309672	70.3774	45	1	1	1	1	34	2	2	12	12	7	8	0	2	7	8	12	12	2
C13634	C15H16O4	35	260.2851	260.104859	69.2166	6.1959	24.5875	0	0	0	0	46.3	76.17430173	7.654706813	36.58301696	3.86651841	238.2050847	6.635729586	15.16505654	4	4	4	4	3.172108104	1.903556085	1.905333499	16	16	27.81056999	72.0554	25	2	1	2	1	36	2	2	12	12	7	8	0	2	7	8	12	12	2
C13637	C8H10O	19	122.1644	122.0731649	78.6527	8.2507	13.0966	0	0	0	0	19.28	44.96077157	5.067646424	25.31051307	3.39531842	124.2374421	5.292379321	10.08682804	1	1	1	1	NaN	2.627463557	2.627670549	2	2	14.54901656	37.6811	5	1	1	1	1	19	1	1	6	6	3	3	0	1	3	3	6	6	1
C13638	C8H10O2	20	138.1638	138.0680796	69.5447	7.2953	23.16	0	0	0	0	20.25	47.41048711	5.024260373	26.72393423	3.41462619	132.9862494	5.507707627	10.15451901	2	2	2	2	3.301913438	1.317455034	1.318905752	4	4	15.22573702	39.2736	5	2	1	2	1	20	1	1	6	6	4	4	0	1	4	4	6	6	1
C13747	C7H8N4O2	21	180.164	180.0647255	46.6658	4.4757	17.7609	31.0977	0	0	0	43.93	56.76535353	5.030590924	26.06092841	3.799463007	146.5379036	4.221452968	9.86500016	3	1	5	1	4.954683186	0.240216841	0.24028834	8	4	16.05522751	46.7153	92	1	1	1	3	22	2	2	9	10	4	4	0	2	4	4	9	10	0
C13952	C17H25N3O18P2	65	621.3372	621.060834	32.8617	4.0555	46.3499	6.7628	9.97	0	0	169.25	111.0726754	8.055454129	79.44492293	6.021709755	464.2265949	12.50863812	13.89393358	15	9	21	9	0.443282343	-12.97631843	-4.964368734	256	23	48.53726788	117.4245	3168	2048	1	2048	18	67	3	3	17	17	23	25	2	1	34	36	6	6	0
C14039	C2H2Cl2	6	96.943	95.95335548	24.7789	2.0794	0	0	0	0	73.1419	1.73	26.82867401	3.24179132	16.98821185	3.066517137	65.61855814	3.5	6.251112041	0	0	0	0	NaN	1.861137303	1.861137303	1	1	7.947819633	30.3754	1	1	1	1	1	5	0	0	0	0	4	3	0	0	4	3	0	0	0
C14082	C11H10	21	142.1971	142.0782503	92.9117	7.0883	0	0	0	0	0	30.04	54.81364686	4.835753353	26.41863976	4.073723437	142.1481284	4.245558005	9.604566066	0	0	0	0	NaN	3.476143962	3.476143962	1	1	19.82770978	47.5494	1	1	1	1	1	22	2	2	10	11	1	1	0	2	1	1	10	11	2
C14089	C11H10O	22	158.1965	158.0731649	83.5149	6.3714	10.1136	0	0	0	0	30.87	57.24074437	4.898552706	29.77151357	4.214943568	150.8341954	4.762166207	9.443307168	1	1	1	1	6.196882009	2.195372802	2.195372805	2	2	20.40339622	49.3241	1	1	1	1	1	23	2	2	10	11	2	2	0	2	2	2	10	11	2
C14090	C11H8O	20	156.1806	156.0575149	84.5929	5.1629	10.2442	0	0	0	0	33.11	56.60630772	5.090339568	25.27585465	4.119569428	144.556929	4.487037679	9.630056952	1	0	2	0	NaN	2.675224917	2.675224917	2	1	19.83679855	49.0922	38	1	1	1	1	21	2	2	10	11	2	2	0	2	2	2	10	11	2
C14091	C11H8O2	21	172.18	172.0524295	76.7323	4.6832	18.5845	0	0	0	0	36.6	60.28683505	5.32751366	26.77469976	4.186818954	153.1173448	4.250730118	10.64855528	2	1	3	1	NaN	-0.519864963	2.620305481	2	2	20.18682524	49.7644	54	1	1	1	1	22	2	2	10	11	3	3	0	2	3	3	10	11	2
C14097	C8H6O5	19	182.1302	182.0215233	52.7565	3.3205	43.923	0	0	0	0	26.34	57.11035428	5.64675624	24.97513249	4.17286699	146.1181658	4.407544932	10.98504282	5	3	7	3	NaN	-4.614464766	2.28484631	8	8	15.77013873	42.5513	49	1	1	1	1	19	1	1	6	6	7	7	0	1	7	7	6	6	1
C14098	C11H10	21	142.1971	142.0782503	92.9117	7.0883	0	0	0	0	0	28.57	55.75844185	5.272531026	25.18420535	3.824250549	141.9989546	4.153113086	10.40645588	0	0	0	0	NaN	3.476143962	3.476143962	1	1	19.82710537	47.5494	1	1	1	1	1	22	2	2	10	11	1	1	0	2	1	1	10	11	2
C14099	C11H8O	20	156.1806	156.0575149	84.5929	5.1629	10.2442	0	0	0	0	28.62	57.24178469	5.402472601	25.1513055	3.78008189	144.3459887	3.989743571	10.37625862	1	0	2	0	NaN	2.675224917	2.675224917	2	1	19.83433412	49.0922	39	1	1	1	1	21	2	2	10	11	2	2	0	2	2	2	10	11	2
C14101	C11H8O2	21	172.18	172.0524295	76.7323	4.6832	18.5845	0	0	0	0	29.39	61.08620372	5.884450089	25.77627703	3.955688822	152.912846	3.955914068	11.36286219	2	1	3	1	NaN	-0.275878646	2.620305481	2	2	20.18361088	49.7644	55	1	1	1	1	22	2	2	10	11	3	3	0	2	3	3	10	11	2
C14115	C15H14O4	33	258.2693	258.0892089	69.7568	5.4637	24.7794	0	0	0	0	38.36	75.74540412	7.13881937	39.26461559	4.741215821	231.7727068	6.727294311	13.87173954	4	2	6	2	NaN	-0.962156393	2.712352705	16	16	28.05160479	69.2577	9	2	1	2	9	34	2	2	10	11	9	9	0	2	9	9	10	11	2
C14116	C36H48N7O19P3S	114	1007.788	1007.193853	42.9044	4.8007	30.1639	9.7289	9.2203	3.1817	0	315.8	219.1936394	13.17120888	112.9510655	8.64961993	808.2827213	11.19012015	25.98068419	19	10	26	11	2.107464118	-11.50299101	-4.221398754	256	24	91.5051611	228.822	5000	256	1	256	72	118	5	5	24	26	42	44	1	4	47	49	19	21	2
C14117	C36H46N7O19P3S	112	1005.772	1005.178203	42.9904	4.6099	30.2244	9.7484	9.2388	3.1881	0	288.32	209.9738444	14.93996914	109.8020996	7.424570149	797.7877417	9.95832621	29.49889215	19	10	26	11	2.103776276	-11.43502625	-4.055656142	256	24	91.31917328	229.6979	5000	256	2	128	144	116	5	5	24	26	42	44	1	4	47	49	19	21	2
C14143	C27H44N7O19P3S	101	895.66	895.1625525	36.2067	4.9516	33.9402	10.9469	10.3746	3.58	0	252.82	191.1981764	14.64419299	103.6588124	7.574545458	709.7843705	13.39881825	29.13587363	19	10	26	11	2.106572841	-13.75111033	-6.443259506	256	24	76.67550094	192.3033	5000	128	1	128	72	103	3	3	14	15	43	44	1	2	48	49	9	10	0
C14147	C6H10N6	22	166.1838	166.0966944	43.3642	6.0652	0	50.5706	0	0	0	142.64	56.39613173	5.561370279	28.58992074	4.117699655	141.8679295	5.296695066	11.23670653	6	3	6	5	11.59993723	-1.110412779	0.172580839	64	64	15.92861041	49.1654	29	1	1	1	10	23	2	2	9	9	3	4	1	1	6	7	6	6	1
C14148	C6H9N5O	21	167.1686	167.0807099	43.1087	5.4265	9.5708	41.8939	0	0	0	142.84	54.96857359	5.644737261	28.80489091	4.1732478	139.4324613	5.763906063	10.95072151	6	3	6	4	8.697091859	0.697883011	0.697941471	64	64	15.4416465	46.4459	51	1	1	1	17	22	2	2	9	9	3	4	1	1	6	7	6	6	1
C14149	C6H8N4O2	20	168.1533	168.0647255	42.8563	4.7953	19.0295	33.3189	0	0	0	142.83	53.32058264	5.244495571	27.62563301	4.099204575	136.8583114	5.298528635	10.55402448	6	3	6	3	6.258034758	1.22330204	1.223302104	64	64	14.96217672	43.7264	29	1	1	1	10	21	2	2	9	9	3	4	1	1	6	7	6	6	1
C14150	C3H7N	11	57.0944	57.05784923	63.1097	12.3577	0	24.5325	0	0	0	130.24	24.14045127	3.309698414	19.46138924	2.740252854	62.46291741	5.504534852	6.17194964	1	1	1	2	NaN	-2.905649651	-0.159894329	2	2	7.059403125	17.13	1	1	1	1	1	11	1	1	3	3	1	1	1	0	4	4	0	0	1
C14180	C11H19N3O7S	41	337.349	337.0943707	39.1635	5.6769	33.1988	12.456	0	9.505	0	27.38	87.17954701	8.179274946	54.24242142	5.511964044	286.5839944	10.10362157	16.41111544	8	6	12	7	2.724691265	-8.707077126	-5.687849007	256	12	29.9913085	75.2021	81	4	1	4	623	40	0	0	0	0	22	21	0	0	22	21	0	0	0
C14450	C6H6ClN	14	127.572	127.0188769	56.489	4.7406	0	10.9794	0	0	27.7906	13.04	43.75204801	4.675279306	20.18938694	3.504436428	106.9087194	3.538405664	9.337143558	1	1	1	2	NaN	1.748230205	1.748364538	2	2	13.31758498	35.5632	5	1	1	1	1	14	1	1	6	6	2	2	0	1	2	2	6	6	1
C14556	C20H12O	33	268.3087	268.088815	89.529	4.508	5.9631	0	0	0	0	65.87	90.15553763	6.87654922	30.75142411	4.720852696	236.0373154	3.995570234	13.58220595	1	1	1	1	NaN	4.969065945	4.969838916	2	2	38.12753514	85.1537	687	1	1	1	1	37	5	5	20	24	1	1	0	5	1	1	20	24	5
C14749	C20H32O3	55	320.4663	320.2351449	74.9576	10.0647	14.9776	0	0	0	0	51.2	103.6586641	9.602524152	48.25419236	4.879054099	339.7647052	6.997236156	19.17697189	3	2	4	2	1.6039882	2.958422961	5.122498554	4	8	37.74005682	101.7005	3	32	16	2	2	54	0	0	0	0	23	22	0	0	23	22	0	0	0
C14768	C20H32O3	55	320.4663	320.2351449	74.9576	10.0647	14.9776	0	0	0	0	163.27	107.0417907	10.13196248	53.23210864	5.494322739	335.9348458	8.832468575	20.43660896	3	1	4	1	0.11827581	3.151054491	5.649173906	4	8	37.31892009	98.3583	3	32	8	4	2	55	1	1	3	3	20	20	1	0	23	23	0	0	0
C14769	C20H32O3	55	320.4663	320.2351449	74.9576	10.0647	14.9776	0	0	0	0	163.71	106.0074461	11.01533788	50.22096197	4.765838728	336.0408914	8.463296416	21.82780007	3	1	4	1	0.117051319	3.150939975	5.649173906	4	8	37.31892009	98.3583	3	32	8	4	2	55	1	1	3	3	20	20	1	0	23	23	0	0	0
C14770	C20H32O3	55	320.4663	320.2351449	74.9576	10.0647	14.9776	0	0	0	0	163.3	109.8045998	8.9348021	61.84668354	7.107148894	336.1161992	7.965761138	17.58727691	3	1	4	1	0.312080976	3.485098314	5.649173906	4	8	37.31892009	98.3583	3	32	8	4	2	55	1	1	3	3	20	20	1	0	23	23	0	0	0
C14771	C20H32O3	55	320.4663	320.2351449	74.9576	10.0647	14.9776	0	0	0	0	162.63	108.4669739	11.92610635	34.51955773	3.765227442	336.1427029	7.361954273	23.76068921	3	1	4	1	0.313314982	3.485098314	5.649173906	4	8	37.31892009	98.3583	3	32	8	4	2	55	1	1	3	3	20	20	1	0	23	23	0	0	0
C14778	C20H32O3	55	320.4663	320.2351449	74.9576	10.0647	14.9776	0	0	0	0	51.34	104.2566828	9.532941075	47.13544053	5.123380898	339.6813408	7.921113892	19.46538088	3	2	4	2	1.605928529	3.192284151	5.356359744	4	8	37.74005682	101.4695	3	32	16	2	2	54	0	0	0	0	23	22	0	0	23	22	0	0	0
C14781	C20H32O4	56	336.4657	336.2300595	71.3933	9.5861	19.0205	0	0	0	0	161.73	111.7288125	11.97252651	46.46888031	4.398319954	344.4598646	7.22776519	23.90067979	4	2	5	2	0.99544481	2.410194702	4.574270299	8	16	37.93260835	99.7198	3	64	8	8	2	56	1	1	3	3	21	21	1	0	24	24	0	0	0
C14782	C20H34O5	59	354.481	354.2406242	67.765	9.6676	22.5674	0	0	0	0	46.41	115.2678962	11.17905482	54.50843816	5.702131915	364.6161358	7.20205165	21.58548491	5	4	6	4	1.067290695	1.248491029	3.412566727	16	32	39.21303299	103.2299	3	64	8	8	2	58	0	0	0	0	25	24	0	0	25	24	0	0	0
C14786	C10H8O	19	144.1699	144.0575149	83.3093	5.5931	11.0976	0	0	0	0	142	50.54862645	4.770200171	25.36221125	3.914564327	128.2692939	4.580426596	9.426238753	1	0	1	0	NaN	2.158174724	2.158174724	2	2	16.76782657	43.8697	1	4	1	4	1	21	3	3	11	13	0	0	2	1	5	7	6	6	2
C14787	C10H8O	19	144.1699	144.0575149	83.3093	5.5931	11.0976	0	0	0	0	141.94	50.2390827	4.74757545	26.06105436	3.912341351	128.2643348	4.469296458	9.33517534	1	0	1	0	NaN	2.158174724	2.158174724	2	2	16.76782657	43.8697	1	4	1	4	1	21	3	3	11	13	0	0	2	1	5	7	6	6	2
C14810	C20H32O4	56	336.4657	336.2300595	71.3933	9.5861	19.0205	0	0	0	0	163.83	107.1715867	7.880261701	52.13737738	5.742093957	344.7570069	7.896303427	15.57941485	4	2	5	2	0.742171787	2.56610209	4.730177759	8	16	37.93260835	99.5658	3	64	8	8	2	56	1	1	3	3	21	21	1	0	24	24	0	0	0
C14811	C20H34O5	59	354.481	354.2406242	67.765	9.6676	22.5674	0	0	0	0	51.92	110.8710094	10.4218059	59.14504454	5.601879914	364.5203019	8.285173225	20.74650364	5	4	6	4	1.007113202	1.404398186	3.568474187	16	32	39.21303299	103.0759	3	64	8	8	2	58	0	0	0	0	25	24	0	0	25	24	0	0	0
C14812	C20H32O4	56	336.4657	336.2300595	71.3933	9.5861	19.0205	0	0	0	0	53.85	111.4893703	8.559820886	57.42914288	6.285461693	348.6717612	7.524563301	17.20257014	4	2	5	2	0.333500988	3.708200224	5.805695121	8	8	38.42090435	102.8197	3	32	16	2	2	55	0	0	0	0	24	23	0	0	24	23	0	0	0
C14813	C20H32O4	56	336.4657	336.2300595	71.3933	9.5861	19.0205	0	0	0	0	161.52	111.3394767	9.803069106	60.06528689	5.902027758	344.8627288	7.863455399	19.36710177	4	2	5	2	0.985849694	2.410194701	4.574270299	8	16	37.93260835	99.7198	3	64	8	8	2	56	1	1	3	3	21	21	1	0	24	24	0	0	0
C14814	C20H34O5	59	354.481	354.2406242	67.765	9.6676	22.5674	0	0	0	0	46.97	102.8219347	8.577510514	77.71558086	6.59408833	364.6912851	10.06348685	16.22558213	5	4	6	4	1.060152301	1.248491034	3.412566727	16	32	39.21303299	103.2299	3	64	8	8	2	58	0	0	0	0	25	24	0	0	25	24	0	0	0
C14815	C20H30O4	54	334.4498	334.2144094	71.8236	9.0412	19.1352	0	0	0	0	166.78	116.4068937	8.604471551	62.10898874	6.809230268	336.964676	9.945159221	16.50419826	4	2	5	2	1.464452585	1.741898872	4.212348642	8	16	37.69129108	100.8364	3	128	16	8	2	54	1	1	3	3	21	21	1	0	24	24	0	0	0
C14820	C20H32O4	56	336.4657	336.2300595	71.3933	9.5861	19.0205	0	0	0	0	50.07	102.6322294	7.651740461	66.32104372	5.712841184	348.8024233	8.525584579	14.71601869	4	2	5	2	0.295513649	3.641611118	5.805695121	8	8	38.42090435	102.8197	3	32	16	2	2	55	0	0	0	0	24	23	0	0	24	23	0	0	0
C14823	C20H32O4	56	336.4657	336.2300595	71.3933	9.5861	19.0205	0	0	0	0	54.97	105.9996227	10.60806078	57.85123746	5.420362351	348.7768048	8.962267068	20.53471056	4	2	5	2	0.067351143	3.244296379	5.805695121	8	8	38.42090435	102.8197	3	32	16	2	2	55	0	0	0	0	24	23	0	0	24	23	0	0	0
C14825	C18H32O3	53	296.4449	296.2351449	72.9284	10.8803	16.1913	0	0	0	0	153.27	108.8770374	11.86985876	44.48538711	4.273271592	317.4984007	9.048666258	23.97588647	3	1	4	1	0.200588643	3.127470222	5.483879889	4	8	34.11244888	86.9231	3	8	2	4	2	53	1	1	3	3	18	18	1	0	21	21	0	0	0
C14826	C18H32O3	53	296.4449	296.2351449	72.9284	10.8803	16.1913	0	0	0	0	154.29	106.3502721	11.10426098	54.18168046	5.59759064	317.5463575	7.755352822	22.04539498	3	1	4	1	0.401641312	3.480832246	5.483879889	4	8	34.11244888	86.9231	3	8	2	4	2	53	1	1	3	3	18	18	1	0	21	21	0	0	0
C14828	C18H34O4	56	314.4602	314.2457096	68.7504	10.898	20.3516	0	0	0	0	37.71	104.670793	11.45768254	54.01118136	5.518145776	337.3216637	11.1663759	22.23755994	4	3	5	3	0.904346515	1.965766592	4.322176317	8	16	35.38997002	90.4332	3	8	2	4	2	55	0	0	0	0	22	21	0	0	22	21	0	0	0
C14829	C18H34O4	56	314.4602	314.2457096	68.7504	10.898	20.3516	0	0	0	0	37.67	107.6028581	10.93617471	52.55973692	5.362871453	337.3793856	8.490383155	21.8982366	4	3	5	3	1.071475361	2.319128616	4.322176317	8	16	35.38997002	90.4332	3	8	2	4	2	55	0	0	0	0	22	21	0	0	22	21	0	0	0
C14839	C6H5BrO	13	173.007	171.9523774	41.6539	2.913	9.2478	0	0	0	46.1854	131.64	39.4762841	4.286949122	21.46783319	3.45053503	102.2635093	4.614355874	8.626846751	1	0	1	0	NaN	1.356936083	1.356936083	2	2	13.35956154	36.5863	1	4	1	4	1	14	2	2	7	8	1	1	2	0	8	9	0	0	1
C14840	C6H5BrO	13	173.007	171.9523774	41.6539	2.913	9.2478	0	0	0	46.1854	131.36	39.93620481	4.325672699	22.05734255	3.454747007	102.2918578	4.862793335	8.608315662	1	0	1	0	NaN	1.356936083	1.356936083	2	2	13.35885537	36.5863	1	4	1	4	1	14	2	2	7	8	1	1	2	0	8	9	0	0	1
C14849	C20H12O	33	268.3087	268.088815	89.529	4.508	5.9631	0	0	0	0	179.61	87.09847977	6.841423979	31.22985106	4.661113241	230.6058551	4.991067715	13.71300092	1	0	1	0	NaN	4.468856388	4.468856388	2	2	36.22350868	84.5343	1	4	1	4	1	38	6	6	21	26	0	0	2	4	5	7	16	19	5
C14850	C20H12O	33	268.3087	268.088815	89.529	4.508	5.9631	0	0	0	0	181.48	87.63509219	6.88719157	31.75064652	4.619608811	230.7141231	5.742309809	13.69306933	1	0	1	0	NaN	4.468856388	4.468856388	2	2	36.22337544	84.5343	1	4	1	4	1	38	6	6	21	26	0	0	2	4	5	7	16	19	5
C14851	C20H12O	33	268.3087	268.088815	89.529	4.508	5.9631	0	0	0	0	178.91	88.82084817	6.89678794	32.75934474	4.765843791	231.6173537	4.434465028	13.67144082	1	0	1	0	NaN	4.51668932	4.51668932	2	2	36.13645234	82.9017	1	4	1	4	1	38	6	6	21	26	0	0	2	4	3	5	18	21	5
C14852	C20H14O2	36	286.324	286.0993797	83.8959	4.9284	11.1757	0	0	0	0	70.11	89.54144112	7.038553699	36.12672627	4.628611565	250.5088864	6.263022039	13.89897813	2	2	2	2	5.005316334	3.307152509	3.307152816	4	4	37.38899348	88.0444	1	4	1	4	1	40	5	5	20	24	2	2	1	4	6	7	16	19	5
C14853	C20H14O3	37	302.3234	302.0942943	79.456	4.6676	15.8764	0	0	0	0	184.25	89.98493074	7.009256124	37.25864966	4.7184512	255.5695013	6.186990798	13.80730435	3	2	3	2	4.749172611	2.598270145	2.598270831	8	8	37.37629907	86.1407	1	16	1	16	1	42	6	6	21	26	2	2	2	4	7	9	16	19	5
C14854	C20H12O2	34	284.3081	284.0837296	84.4907	4.2543	11.255	0	0	0	0	180.86	90.11262206	6.885579269	32.54926153	4.7868262	240.0467561	4.452245535	13.67990408	2	1	2	1	2.736378153	4.212351575	4.213123999	4	4	36.61061673	84.8826	322	4	1	4	1	39	6	6	21	26	1	1	2	4	4	6	18	21	5
C14857	C2H2Cl2O	7	112.943	111.9482701	21.2686	1.7849	14.1659	0	0	0	62.7803	118.73	28.29499452	3.354009451	20.52447935	3.05962888	70.83485251	4.591657988	6.503034124	1	0	1	0	NaN	1.21453638	1.21453638	2	2	8.309140019	21.2782	1	1	1	1	1	7	1	1	3	3	2	2	1	0	5	5	0	0	0
C14858	C2H2Cl2O	7	112.943	111.9482701	21.2686	1.7849	14.1659	0	0	0	62.7803	0.92	27.67076461	3.439554606	21.83288226	3.059425509	75.56159839	5.336307002	6.795415738	1	0	2	0	NaN	0.898737791	0.899566361	8	4	8.387700826	21.6941	2	1	1	1	2	6	0	0	0	0	5	4	0	0	5	4	0	0	0
C14859	C2H2Cl2O	7	112.943	111.9482701	21.2686	1.7849	14.1659	0	0	0	62.7803	1.28	28.43634066	3.421141439	18.65564192	2.881155503	75.43282551	5.02883892	6.848056926	1	0	2	0	NaN	0.847327741	0.847327741	4	2	8.409953542	21.2554	2	1	1	1	2	6	0	0	0	0	5	4	0	0	5	4	0	0	0
C14866	C2HCl3O	7	147.388	145.9092978	16.2981	0.6839	10.8553	0	0	0	72.1626	2.68	28.99720783	3.542397224	24.9675564	3.122698294	89.68482568	5.896080726	6.150953091	1	0	2	0	NaN	1.370426459	1.370426459	4	2	10.37813145	27.2329	2	1	1	1	1	6	0	0	0	0	6	5	0	0	6	5	0	0	0
C14870	C2H3BrO	7	122.949	121.9367274	19.5377	2.4594	13.013	0	0	0	64.9895	0.75	24.9583296	3.557551315	17.0664163	2.674793708	65.85871556	5.090235149	7.024521901	1	0	2	0	NaN	0.340875816	0.340877106	4	4	7.546036861	19.455	2	1	1	1	2	6	0	0	0	0	4	3	0	0	4	3	0	0	0
C14899	C6H11O10P	28	274.1193	274.0089831	26.2894	4.0447	58.3666	0	11.2994	0	0	54.69	58.01318246	5.593541147	39.43443929	4.163801031	205.4700924	7.942321337	11.06731632	9	6	12	6	NaN	-9.012476443	-2.76594495	256	256	19.96725003	48.4523	24	8	1	8	32	27	0	0	0	0	17	16	0	0	17	16	0	0	0
C15527	C41H46N4O16	107	850.8211	850.2908814	57.8781	5.4495	30.0875	6.585	0	0	0	154.78	174.8221101	8.859447859	118.7845832	8.357926002	727.0297277	12.63141024	17.12504092	17	11	25	11	2.75613043	-20.67074101	1.567466577	256	14	79.54199589	211.0102	5000	4	1	4	768	111	5	5	24	28	37	37	2	3	46	50	15	15	0
C15547	C32H42N7O19P3S	104	953.698	953.1469024	40.3002	4.4389	31.8747	10.2807	9.7433	3.3622	0	272.55	188.3006651	12.80082226	97.98353168	7.133514577	744.6291008	10.68057104	25.58107632	19	11	25	12	2.120196411	-8.703056361	-4.068405443	256	26	84.91297134	213.2905	5000	128	1	128	36	108	5	5	24	26	38	40	1	4	43	45	19	21	2
C15556	C4H9O6P	20	184.0844	184.0136745	26.0982	4.9279	52.148	0	16.8258	0	0	49.19	44.94068242	4.764603408	28.52198676	3.593647569	143.4784821	7.511942037	8.940044657	5	3	7	3	NaN	-4.367197548	-1.312679993	64	32	14.118936	34.8075	8	2	1	2	5	19	0	0	0	0	11	10	0	0	11	10	0	0	0
C15586	C10H12N4O4	30	252.2267	252.0858549	47.6187	4.7954	25.373	22.2129	0	0	0	45.87	69.7262238	6.267642565	36.16021351	4.004409009	205.1434855	5.657377613	12.12840479	7	3	7	3	8.211846308	-1.856901544	-1.856495448	128	128	23.3815334	58.1817	55	16	1	16	1	32	3	3	14	15	4	5	1	2	9	10	9	10	0
C15587	C5H4N4	13	120.1121	120.0435961	49.9979	3.3567	0	46.6454	0	0	0	28.52	39.82698302	4.40121258	19.78232653	3.425327967	96.22283265	3.400000014	8.770484904	3	1	3	1	6.77110502	-0.34162909	-0.339001807	16	16	12.21420516	33.2056	54	1	1	1	4	14	2	2	9	10	0	0	0	2	0	0	9	10	0
C15605	C11H12N2O4	29	236.224	236.0797069	55.929	5.1203	27.0919	11.8588	0	0	0	40.77	72.63669739	6.201675083	36.60683296	4.772515492	206.1264629	5.64353448	12.37521437	5	3	8	4	5.312339644	-2.030599846	-2.026451668	128	128	22.89672602	60.7223	102	2	1	2	20	29	1	1	6	6	11	11	0	1	11	11	6	6	1
C15606	C6H10O3S	20	162.207	162.0350649	44.4273	6.2139	29.5907	0	0	19.768	0	18.62	49.82105056	5.549443722	29.34253941	3.835834834	143.7027111	5.604167669	10.9816375	3	2	4	2	2.697440154	0.778745074	0.811645959	16	8	15.95922625	41.8688	7	2	2	1	15	19	0	0	0	0	10	9	0	0	10	9	0	0	0
C15650	C6H11O6PS	25	242.187	242.0013953	29.7556	4.578	39.6373	0	12.7892	13.2398	0	57.03	62.96966147	7.179420805	30.16282013	3.346744244	189.843896	6.587714311	14.05051705	5	2	8	2	NaN	-2.763275677	0.512828695	64	16	20.20096399	51.1971	12	1	1	1	9	24	0	0	0	0	14	13	0	0	14	13	0	0	0
C15651	C6H11O6PS	25	242.187	242.0013953	29.7556	4.578	39.6373	0	12.7892	13.2398	0	60.36	64.1511173	5.856685474	37.15221202	4.339386293	188.6389656	5.763632277	11.56422979	5	3	7	3	NaN	-2.923669036	0.157780814	32	32	20.47093279	52.7417	23	2	2	1	9	24	0	0	0	0	14	13	0	0	14	13	0	0	0
C15672	C49H58FeN4O5	117	838.854	838.3756631	70.1581	6.9691	9.5365	6.679	0	0	0	260.95	224.1144492	14.82291403	119.0286888	8.267526397	767.7226065	12.98939473	27.81533699	7	3	9	3	3.159828267	5.642199313	11.25478039	32	128	96.95669641	237.9118	4996	8	4	2	4	122	6	6	25	30	34	34	4	2	49	54	10	10	0
C15700	C9H16N2O4	31	216.2343	216.111007	49.9904	7.4581	29.5964	12.9551	0	0	0	16.47	66.03035075	7.479187853	31.89569964	3.642815858	202.7524339	6.161922988	14.77826467	5	3	8	4	5.700903753	-4.071110082	-4.068386115	128	128	20.74053879	52.6202	18	2	1	2	42	30	0	0	0	0	15	14	0	0	15	14	0	0	0
C15767	C9H16N2O5	32	232.2337	232.1059216	46.5463	6.9443	34.4468	12.0626	0	0	0	16.5	66.88862668	7.572592164	33.13772644	3.644644281	211.2714255	8.082543862	14.99518329	6	4	9	5	3.079212358	-6.494445823	-3.987539354	64	128	21.26469758	53.5456	27	2	1	2	42	31	0	0	0	0	16	15	0	0	16	15	0	0	0
C15769	C8H7NO3	19	165.1461	165.0425931	58.1822	4.2723	29.0641	8.4814	0	0	0	28.97	51.69818031	4.980472635	25.56128731	3.747046112	136.0645471	4.811858713	9.28268832	3	2	4	2	2.54499351	0.465486981	0.465874253	8	4	15.82680779	42.0235	33	2	1	2	2	20	2	2	10	11	2	2	1	1	6	7	6	6	1
C15770	C8H7NO4	20	181.1455	181.0375077	53.0433	3.895	35.3294	7.7323	0	0	0	29.22	53.43896022	4.978211756	28.27650887	3.923057325	145.1616174	4.929640112	9.683139283	4	2	5	2	1.463568289	0.051215365	0.103082529	8	4	16.50141073	42.0073	33	2	1	2	1	21	2	2	10	11	3	3	1	1	7	8	6	6	1
C15776	C29H48O	78	412.6908	412.3705162	84.3998	11.7233	3.8768	0	0	0	0	125.57	128.4543666	10.29218968	52.21827183	4.836590521	454.8995707	8.027055363	20.22595699	1	1	1	1	8.95234114	7.373577315	7.373577318	2	2	51.4368601	129.1476	1	256	1	256	1	81	4	4	17	20	13	13	4	0	30	33	0	0	4
C15785	C28H46O	75	398.6642	398.3548661	84.3566	11.6301	4.0133	0	0	0	0	140.87	122.4609262	10.06102856	48.85761071	4.597558347	440.0718364	9.235278847	19.91940703	1	0	2	0	7.123261487	7.967154075	7.967154075	8	8	49.27319705	124.1137	3	256	1	256	5	78	4	4	17	20	12	12	4	0	29	32	0	0	4
C15786	C28H48O	77	400.6801	400.3705162	83.9322	12.0747	3.9931	0	0	0	0	110.43	126.8683652	10.3791091	52.31442424	5.258833419	446.7724317	6.646603535	20.28413971	1	0	2	0	NaN	8.01298841	8.01298841	4	4	49.5079235	123.287	2	512	1	512	3	80	4	4	17	20	12	12	4	0	29	32	0	0	4
C15787	C28H50O	79	402.696	402.3861662	83.512	12.5149	3.9731	0	0	0	0	110.56	128.2217296	10.53083085	51.38886588	4.789871214	453.2884892	7.265860514	20.86253697	1	1	1	1	8.474624103	7.805487607	7.805487608	2	2	50.05885175	124.3151	1	1024	1	1024	1	82	4	4	17	20	12	12	4	0	29	32	0	0	4
C15789	C28H48O2	78	416.6795	416.3654308	80.7094	11.6111	7.6795	0	0	0	0	119.94	129.2945703	10.52536742	50.30698573	5.243322781	455.9057386	6.89007805	20.70496367	2	1	3	1	6.271007383	6.882237062	6.882237065	8	8	50.09726234	124.9824	2	1024	1	1024	3	81	4	4	17	20	13	13	4	0	30	33	0	0	4
C15790	C28H48O3	79	432.6789	432.3603454	77.725	11.1818	11.0933	0	0	0	0	127.36	119.7971131	9.461748638	59.08698393	4.712410093	464.595105	9.780766513	18.928726	3	2	4	2	7.280264408	5.573472262	5.573472268	16	16	50.69939527	126.5749	2	2048	1	2048	3	82	4	4	17	20	14	14	4	0	31	34	0	0	4
C15791	C28H48O4	80	448.6783	448.35526	74.9534	10.783	14.2636	0	0	0	0	127.43	120.3781535	9.479436832	59.75202881	4.813281126	473.0295625	9.537538592	19.11445962	4	3	5	3	5.520486614	4.576522293	4.576522391	32	32	51.31308413	127.8594	2	4096	1	4096	3	83	4	4	17	20	15	15	4	0	32	35	0	0	4
C15792	C28H46O4	78	446.6624	446.33961	75.2917	10.3804	14.328	0	0	0	0	118.64	120.0523345	9.587300999	63.44939659	5.038825301	466.4014848	9.576713554	18.74383685	4	2	6	2	5.359860189	4.784023097	4.784023193	256	64	50.7662988	126.8313	4	2048	1	2048	13	81	4	4	17	20	15	15	4	0	32	35	0	0	4
C15793	C28H48O4	80	448.6783	448.35526	74.9534	10.783	14.2636	0	0	0	0	126.93	121.0216845	9.562355109	59.70197658	4.795781327	473.2520963	10.33083731	18.94905494	4	3	5	3	5.520486614	4.576522293	4.576522391	32	32	51.31308413	127.8594	2	4096	1	4096	3	83	4	4	17	20	15	15	4	0	32	35	0	0	4
C15794	C28H48O5	81	464.6777	464.3501746	72.3727	10.4118	17.2156	0	0	0	0	120.31	125.0312805	9.287863493	57.88891087	4.728387024	481.4661477	9.300044055	18.4816102	5	4	6	4	5.419702991	3.501618632	3.501618784	128	64	51.93724556	129.2209	2	8192	1	8192	3	84	4	4	17	20	16	16	4	0	33	36	0	0	4
C15797	C28H48O2	78	416.6795	416.3654308	80.7094	11.6111	7.6795	0	0	0	0	116.07	120.4188548	9.401441	56.13879779	4.587230471	455.5701724	9.436200824	19.05254571	2	1	3	1	9.446439831	6.70422361	6.704223613	8	8	50.09726234	124.8795	2	1024	1	1024	3	81	4	4	17	20	13	13	4	0	30	33	0	0	4
C15798	C28H50O2	80	418.6954	418.3810808	80.3208	12.0367	7.6425	0	0	0	0	118.11	121.9084664	9.547697416	61.25803368	4.911019167	461.8808601	9.11591547	19.02637502	2	2	2	2	8.83696327	6.496722804	6.496722811	4	4	50.64688246	125.9076	1	2048	1	2048	1	83	4	4	17	20	13	13	4	0	30	33	0	0	4
C15799	C28H50O3	81	434.6948	434.3759955	77.3645	11.5937	11.0418	0	0	0	0	118.51	119.9138951	9.532888378	60.77616325	5.084214782	470.6900796	9.39837061	18.61539641	3	3	3	3	6.129975747	5.499772837	5.499772934	8	8	51.247688	127.1921	1	4096	1	4096	1	84	4	4	17	20	14	14	4	0	31	34	0	0	4
C15800	C28H48O3	79	432.6789	432.3603454	77.725	11.1818	11.0933	0	0	0	0	117.93	119.3891047	9.517391785	59.08283743	4.624373361	464.2362715	8.913582044	18.88890296	3	2	4	2	5.359909138	5.70727364	5.707273736	16	16	50.69939527	126.164	2	2048	1	2048	3	82	4	4	17	20	14	14	4	0	31	34	0	0	4
C15801	C28H50O3	81	434.6948	434.3759955	77.3645	11.5937	11.0418	0	0	0	0	119.37	118.9695161	9.47620318	56.86852317	4.79605446	470.6706004	11.03959476	18.4727888	3	3	3	3	6.129975747	5.499772837	5.499772934	8	8	51.247688	127.1921	1	4096	1	4096	1	84	4	4	17	20	14	14	4	0	31	34	0	0	4
C15802	C28H50O4	82	450.6942	450.3709101	74.6181	11.1821	14.1998	0	0	0	0	127.85	122.6910301	9.529264891	58.14294175	4.699080504	479.8665029	10.38698146	18.52431211	4	4	4	4	5.423029872	4.424869176	4.424869327	16	16	51.86004198	128.5536	1	8192	1	8192	1	85	4	4	17	20	15	15	4	0	32	35	0	0	4
C15803	C28H50O5	83	466.6936	466.3658247	72.06	10.7987	17.1412	0	0	0	0	118.74	126.6306112	9.464974659	63.50484964	5.208456473	487.9821596	9.386710819	18.55047813	5	5	5	5	5.412829762	3.116104374	3.11610453	32	32	52.48287014	130.1461	1	16384	1	16384	1	86	4	4	17	20	16	16	4	0	33	36	0	0	4
C15857	C40H60	100	540.9044	540.4695019	88.8194	11.1806	0	0	0	0	0	145.03	181.2733485	9.913267403	101.135697	8.275264799	606.3526378	10.63211324	17.67224826	0	0	0	0	NaN	12.65567513	12.65567513	1	1	72.12411072	195.5728	1	272	272	1	1	99	0	0	0	0	40	39	0	0	40	39	0	0	0
C15867	C40H54	94	534.8568	534.4225517	89.8237	10.1763	0	0	0	0	0	156.1	184.7578807	17.8006413	65.69565504	5.256071191	581.9090002	9.092220073	35.53872722	0	0	0	0	NaN	11.56991016	11.56991016	1	1	71.45049012	198.9226	1	4096	4096	1	1	93	0	0	0	0	40	39	0	0	40	39	0	0	0
C15870	C40H58O	99	554.8879	554.4487665	86.5811	10.5356	2.8834	0	0	0	0	184.3	193.9666642	17.85850798	74.461511	5.724283203	608.1004978	9.833691358	35.33260344	1	1	1	1	8.687782387	10.86629661	10.86629662	2	2	72.43157966	198.7921	1	2048	2048	1	1	98	0	0	0	0	41	40	0	0	41	40	0	0	0
C15874	C40H56O	97	552.872	552.4331164	86.8968	10.2094	2.8939	0	0	0	0	153.31	193.6699242	17.65016044	68.40074904	5.511740323	598.5981602	9.946846918	35.26298362	1	1	1	1	8.65688967	10.50437496	10.50437496	2	2	72.20460637	199.9087	1	4096	4096	1	1	96	0	0	0	0	41	40	0	0	41	40	0	0	0
C15877	C41H58O	100	566.8986	566.4487665	86.8654	10.3123	2.8223	0	0	0	0	177.53	198.139049	17.87574694	81.41059328	6.384979099	616.7901616	8.00213044	35.14553737	1	0	1	0	NaN	11.14750146	11.14750146	2	2	74.12925128	204.6599	1	4096	4096	1	1	99	0	0	0	0	42	41	0	0	42	41	0	0	0
C15881	C42H60O2	104	596.9246	596.4593312	84.5081	10.1313	5.3606	0	0	0	0	169.8	198.8927012	17.81966393	73.12997075	5.274582129	642.8303923	10.81839438	35.68956363	2	0	2	0	NaN	10.36317111	10.36317111	4	4	76.59609151	211.5138	1	4160	4160	1	1	103	0	0	0	0	44	43	0	0	44	43	0	0	0
C15882	C27H46O2	75	402.6529	402.3497807	80.5381	11.5149	7.947	0	0	0	0	101.47	133.0856973	11.37678938	69.36597223	6.052043242	449.424573	13.31629121	21.85927143	2	2	2	2	NaN	9.803276638	9.80398483	4	4	49.95715363	128.1616	13	8	2	4	1	75	1	1	6	6	23	23	0	1	23	23	6	6	1
C15883	C28H48O2	78	416.6795	416.3654308	80.7094	11.6111	7.6795	0	0	0	0	93.2	130.35914	8.380080592	86.58315614	7.291535002	466.102086	15.90598123	17.80289531	2	2	2	2	NaN	10.31699316	10.31740622	4	4	51.72439328	133.2028	13	8	2	4	1	78	1	1	6	6	24	24	0	1	24	24	6	6	1
C15886	C41H60O	102	568.9145	568.4644165	86.5576	10.6301	2.8123	0	0	0	0	191.09	198.3896444	17.82523016	75.47178211	6.259995753	625.694799	10.31760699	35.35002275	1	0	1	0	NaN	11.50942312	11.50942312	2	2	74.35617834	203.5433	1	2048	2048	1	1	101	0	0	0	0	42	41	0	0	42	41	0	0	0
C15888	C42H64O2	108	600.9564	600.4906313	83.9411	10.7342	5.3246	0	0	0	0	162.42	201.4690982	17.90752276	87.79315732	6.192688969	658.5244911	9.857653392	35.22080256	2	0	2	0	NaN	11.08701442	11.08701442	4	4	77.05446728	209.2806	1	1056	1056	1	1	107	0	0	0	0	44	43	0	0	44	43	0	0	0
C15892	C40H60O	101	556.9038	556.4644165	86.2677	10.8594	2.8729	0	0	0	0	161.39	196.1252442	17.94530092	61.77472753	5.34079614	615.0365979	8.374243275	35.87475282	1	1	1	1	8.687782387	11.22821827	11.22821827	2	2	72.65897148	197.6755	1	1024	1024	1	1	100	0	0	0	0	41	40	0	0	41	40	0	0	0
C15898	C40H58O	99	554.8879	554.4487665	86.5811	10.5356	2.8834	0	0	0	0	164.64	198.3464826	17.84625929	65.85672318	5.599768264	607.285584	7.865122566	35.34005405	1	1	1	1	8.65688967	10.86629661	10.86629662	2	2	72.43157966	198.7921	1	2048	2048	1	1	98	0	0	0	0	41	40	0	0	41	40	0	0	0
C15900	C41H60O	102	568.9145	568.4644165	86.5576	10.6301	2.8123	0	0	0	0	192.99	203.4100413	17.87668288	79.86105029	7.490099942	625.7009891	9.257913088	34.96445317	1	0	1	0	NaN	11.50942312	11.50942312	2	2	74.35617834	203.5433	1	2048	2048	1	1	101	0	0	0	0	42	41	0	0	42	41	0	0	0
C15925	C16H25N5O16P2	64	605.3411	605.0771528	31.7459	4.1627	42.2886	11.5693	10.2335	0	0	159.54	124.6903354	8.506658617	77.20682485	6.342203948	448.5999318	10.16079028	15.18337822	16	10	19	11	1.479030181	-10.02555114	-5.889283675	256	22	47.67583844	118.5113	2134	2048	1	2048	6	67	4	4	20	21	19	21	2	2	30	32	9	10	0
C15926	C6H13O9P	29	260.1358	260.0297185	27.7025	5.0371	55.3536	0	11.9068	0	0	59.09	64.85138408	5.472292522	39.20906228	4.937871723	199.2165311	5.881214798	10.38643035	8	6	9	6	NaN	-6.269104493	-3.056105249	128	13	19.793746	46.7963	4	32	1	32	1	29	1	1	6	6	10	10	1	0	16	16	0	0	0
C15930	C6H12O7	25	196.1553	196.0583027	36.7383	6.1662	57.0955	0	0	0	0	12.7	51.51195886	5.681143872	31.15705687	3.561137261	167.1808402	6.828286301	11.20260495	7	6	8	6	0.279652988	-6.67750472	-3.409744311	128	128	15.82152015	38.271	3	16	1	16	11	24	0	0	0	0	13	12	0	0	13	12	0	0	0
C15969	C52H76O12	140	893.1526	892.5336779	69.9272	8.5767	21.4961	0	0	0	0	261.41	251.5832879	20.60758647	96.51981085	6.824169853	872.9509344	12.92991765	41.33173824	12	8	12	8	4.595122733	4.808967411	4.808972755	256	17	98.65907107	259.7774	1	ERROR	ERROR	ERROR	1	143	4	4	24	24	40	43	4	0	64	67	0	0	2
C15986	C10H14N2O3	29	210.2298	210.1004423	57.1313	6.7123	22.8313	13.3251	0	0	0	32.64	69.3810352	7.555473371	30.99462515	3.91612884	194.3247811	5.563686815	15.0098704	5	3	6	3	9.959067478	-1.378906346	0.740720748	64	32	21.46491827	56.4814	38	1	1	1	6	29	1	1	6	6	9	9	0	1	9	9	6	6	0
C15987	C5H11NO2	19	117.1463	117.0789786	51.2637	9.4645	27.3152	11.9566	0	0	0	8.51	42.60942395	5.541206753	21.32704615	3.033061961	119.2632386	5.862286239	10.79477134	3	2	4	2	7.39792096	-2.896325399	-2.895999485	4	8	12.00449256	30.2324	3	1	1	1	2	18	0	0	0	0	8	7	0	0	8	7	0	0	0
C15992	C27H46O2	75	402.6529	402.3497807	80.5381	11.5149	7.947	0	0	0	0	231.02	122.0672433	10.73466126	50.42369877	4.611871319	433.7074357	7.602545228	21.26771293	2	1	2	1	6.218890277	6.373174703	6.373174706	4	4	48.14096579	119.1024	1	1024	1	1024	1	79	5	5	18	22	11	11	5	0	29	33	0	0	4
C16075	C8H9NO	19	135.1632	135.0684139	71.0886	6.7115	11.8371	10.3628	0	0	0	19.28	45.87738066	4.711201501	29.09336924	3.477765883	129.4414076	5.241877111	9.419303674	2	1	2	1	6.692523687	1.461647796	1.461857639	4	8	15.43094906	40.2619	3	2	2	1	3	19	1	1	6	6	4	4	0	1	4	4	6	6	1
C16144	C30H48	78	408.7021	408.3756015	88.1623	11.8377	0	0	0	0	0	131.71	150.6294541	9.11472028	82.45410944	8.356836882	468.3810936	7.499441604	15.37733409	0	0	0	0	NaN	10.0600899	10.0600899	1	1	54.56262849	145.7344	1	20	20	1	1	77	0	0	0	0	30	29	0	0	30	29	0	0	0
C16145	C30H42	72	402.6545	402.3286513	89.4864	10.5136	0	0	0	0	0	130.44	152.072107	13.72187192	44.88208645	4.86210153	444.0813643	10.09038436	27.72137579	0	0	0	0	NaN	8.974324926	8.974324926	1	1	53.88788007	149.0842	1	256	256	1	1	71	0	0	0	0	30	29	0	0	30	29	0	0	0
C16153	C14H23N3O15P2	57	535.291	535.0604401	31.4128	4.3308	44.8337	7.85	11.5727	0	0	159.05	109.7527031	7.928189516	66.77989236	5.568014554	400.6458038	10.74600338	16.05761888	13	8	17	9	2.329915534	-6.407413533	-6.674198872	256	19	42.52281682	102.1508	352	1024	1	1024	3	59	3	3	17	17	17	19	2	1	28	30	6	6	0
C16155	C14H20N2O16P2	54	534.2599	534.0288056	31.4734	3.7732	47.915	5.2434	11.595	0	0	152.25	111.0619931	8.051515499	62.63905664	5.151608606	390.647021	8.956074882	15.38557099	13	7	18	7	NaN	-8.642491457	-3.90328618	256	19	41.22795501	99.6515	704	512	1	512	21	56	3	3	17	17	17	19	2	1	28	30	6	6	0
C16156	C61H100NO8P	171	1006.4224	1005.718656	72.7977	10.0151	12.7178	1.3917	3.0776	0	0	264.08	291.8782145	37.16363861	182.2640376	33.86119656	1086.733976	22.92483301	67.47436007	6	4	8	4	0.575112615	13.19783335	15.57384535	64	256	117.9615779	309.0711	15	ERROR	ERROR	ERROR	2	171	1	1	6	6	65	65	1	0	71	71	0	0	0
C16157	C60H100NO7P	169	978.4123	977.7237411	73.6542	10.3018	11.4467	1.4316	3.1657	0	0	244.66	338.8835915	51.57025148	124.348762	58.27997496	1075.337262	115.7349248	91.50441261	6	4	7	5	5.176974581	13.9192527	13.92380619	32	128	116.4667307	304.1178	5	ERROR	ERROR	ERROR	1	169	1	1	6	6	63	63	1	0	69	69	0	0	0
C16162	C39H64N7O17P3S	131	1027.948	1027.329224	45.5682	6.2754	26.4595	9.5381	9.0395	3.1193	0	266.64	223.3451067	16.71691047	114.1990657	7.543562916	878.5418162	12.16518584	32.00656708	17	9	23	10	2.120196387	-5.504540789	-0.871568387	256	23	96.95120627	249.1997	5000	1024	8	128	36	133	3	3	14	15	53	54	1	2	58	59	9	10	0
C16186	C6H9O9P	25	256.104	255.9984184	28.1386	3.5421	56.225	0	12.0942	0	0	71.01	62.29808795	6.33917427	30.93075357	3.860793947	183.9123011	7.566301622	12.85539006	7	5	9	5	NaN	-7.491959692	-2.037124907	128	64	19.02130048	47.905	40	4	1	4	4	25	1	1	5	5	11	11	1	0	16	16	0	0	0
C16201	C10H8O3S	22	208.234	208.0194148	57.6789	3.8723	23.0501	0	0	15.3985	0	65.14	61.11915812	5.377370891	30.75862922	4.272521203	169.7982672	5.629478251	10.74549605	3	1	5	1	NaN	-0.232769328	2.143629289	2	2	22.40192138	53.1307	228	1	1	1	1	23	2	2	10	11	4	4	0	2	4	4	10	11	2
C16202	C10H8O3S	22	208.234	208.0194148	57.6789	3.8723	23.0501	0	0	15.3985	0	62.73	61.49899138	5.671348297	29.32909954	3.936502078	169.6115317	5.606578398	11.15752739	3	1	5	1	NaN	-0.232769343	2.143629289	2	2	22.39746847	53.1307	231	1	1	1	1	23	2	2	10	11	4	4	0	2	4	4	10	11	2
C16204	C14H10O2	26	210.228	210.0680796	79.9845	4.7945	15.221	0	0	0	0	42.66	70.54650623	6.217071337	27.44263663	4.051667967	185.3041172	4.198558516	12.11911466	2	2	2	2	NaN	3.340922479	3.345068686	4	4	26.69598671	62.9202	506	1	1	1	1	28	3	3	14	16	2	2	0	3	2	2	14	16	3
C16209	C14H10O4	28	242.2268	242.0579088	69.4183	4.1611	26.4205	0	0	0	0	53.72	81.70351608	6.833813917	35.3310867	5.011985365	207.4348816	4.557490961	13.47805706	4	2	6	2	NaN	-2.88796628	2.783145925	4	8	26.01786943	66.7663	810	2	2	1	4	29	2	2	10	11	8	8	0	2	8	8	10	11	2
C16235	C7H7NO3	18	153.1354	153.0425931	54.9023	4.6074	31.3436	9.1466	0	0	0	23.45	52.20809579	4.68083736	25.68398122	4.282993142	129.8701586	4.177971547	8.845187833	4	3	5	3	3.938386846	-1.291005609	1.78901896	8	8	14.46953691	40.3014	24	1	1	1	1	18	1	1	6	6	5	5	0	1	5	5	6	6	1
C16238	C18H26N5O8PS2	60	535.532	535.0960407	40.3697	4.8935	23.9006	13.0774	5.7837	11.975	0	122.51	125.7300954	10.5099427	71.60806659	6.361724378	426.3117858	11.7462516	20.93191869	10	4	12	5	3.93798945	-2.115735785	-2.783606446	256	14	49.42399599	124.9477	948	64	1	64	3	63	4	4	19	20	15	17	2	2	25	27	9	10	0
C16246	C7H5Br2NO2	17	294.928	292.8687037	28.5069	1.7088	10.8497	4.7492	0	0	54.1854	22.55	60.50877025	5.189306215	30.67247043	4.661403972	157.3197028	4.205507485	10.33249739	2	2	3	3	2.291406557	0.887431252	2.057826039	8	8	19.90770017	52.3629	16	1	1	1	2	17	1	1	6	6	6	6	0	1	6	6	6	6	1
C16251	C28H50O2	80	418.6954	418.3810808	80.3208	12.0367	7.6425	0	0	0	0	118.46	119.3001654	9.298015275	58.24193724	4.744748663	461.987471	9.433646922	18.90673439	2	2	2	2	8.83696327	6.496722804	6.496722811	4	4	50.64688246	125.9076	1	2048	1	2048	1	83	4	4	17	20	13	13	4	0	30	33	0	0	4
C16262	C13H10O3	26	214.2167	214.0629942	72.8884	4.7052	22.4064	0	0	0	0	47.91	65.72455118	5.585149142	30.03384289	4.140498979	181.5865488	6.208584317	11.13806285	3	2	4	2	3.913766868	0.796762675	0.796783731	8	4	22.63747249	60.8227	31	4	1	4	1	28	3	3	13	15	3	3	2	1	10	12	6	6	3
C16263	C13H10O4	27	230.2161	230.0579088	67.8228	4.3782	27.7989	0	0	0	0	46.75	64.37886613	5.754993201	37.861781	4.630484996	197.2826313	6.938475576	11.425916	4	3	5	3	NaN	-0.494362249	2.670923443	8	8	24.80954593	62.4122	601	1	1	1	1	28	2	2	12	12	5	6	0	2	5	6	12	12	2
C16267	C4H6O2	12	86.0892	86.03677944	55.8058	7.0249	37.1694	0	0	0	0	130.99	30.55476883	3.869089865	20.84037082	2.88747843	78.22026208	5.517305295	7.140189873	2	1	3	1	NaN	-1.981664342	0.556450508	2	4	7.947269565	20.0429	3	1	1	1	2	12	1	1	3	3	3	3	1	0	6	6	0	0	1
C16268	C25H40N7O17P3S	93	835.608	835.1414231	35.934	4.8249	32.5499	11.7336	11.1202	3.8373	0	378.64	174.4484499	12.02228437	102.7491677	7.437103066	653.42789	10.02965189	24.05821955	17	9	23	10	2.120196387	-11.00804542	-6.375073017	256	23	71.64737542	179.6072	5000	128	1	128	36	96	4	4	17	18	36	38	2	2	44	46	9	10	1
C16272	C6H10O4	20	146.1412	146.0579088	49.3114	6.897	43.7916	0	0	0	0	9.91	44.41263893	4.830067978	27.78712358	3.546891486	134.680964	5.765733167	9.668008082	4	2	6	2	0.644552676	-3.440350054	-0.699192387	64	32	13.13477005	33.0506	6	2	1	2	6	19	0	0	0	0	10	9	0	0	10	9	0	0	0
C16281	C7H7NS	16	137.202	137.0299199	61.2782	5.1425	0	10.2088	0	23.3707	0	20.72	49.07791021	4.714210574	21.05654524	3.422928048	122.0997753	3.716817828	9.349885181	0	1	0	2	4.839534202	1.713754859	1.713755695	4	4	16.57482734	43.1273	10	1	1	1	2	16	1	1	6	6	3	3	0	1	3	3	6	6	1
C16283	C7H7NOS	17	153.202	153.0248345	54.8785	4.6054	10.4433	9.1426	0	20.9299	0	29.66	49.38528995	4.695298311	26.00671906	3.499342841	130.4086236	5.168909743	9.20908177	2	1	3	2	3.069030011	1.282300832	1.3122	2	2	16.54722825	40.8922	51	1	1	1	2	17	1	1	6	6	4	4	0	1	4	4	6	6	1
C16286	C12H22O	35	182.3025	182.1670653	79.06	12.1637	8.7763	0	0	0	0	40.85	58.23416695	4.925280401	38.48565148	4.105158479	202.2357589	6.917360857	9.73367785	1	1	1	1	NaN	3.172581756	3.172581791	2	2	22.00104298	54.5778	1	8	1	8	1	36	2	2	10	11	3	3	2	0	13	14	0	0	2
C16298	C21H21O11	53	449.3848	449.1083865	56.1267	4.7102	39.1632	0	0	0	0	72.47	113.6567953	8.602400017	62.64064567	5.572277478	368.2857995	8.740566305	17.09275569	10	8	10	8	6.489831703	-0.793972197	0.387	256	21	44.01146136	116.2575	4266	32	1	32	1	56	4	4	22	23	10	12	1	3	16	18	16	17	2
C16300	C18H28O2	48	276.4137	276.2089301	78.2134	10.2102	11.5764	0	0	0	0	46.97	93.26669354	9.668916635	46.86404686	5.003922448	296.9483158	7.947070235	19.15950188	2	1	3	1	NaN	3.631983508	5.698033481	2	4	33.45658779	90.752	3	16	16	1	2	47	0	0	0	0	20	19	0	0	20	19	0	0	0
C16303	C36H43O25	104	875.7116	875.2093419	49.3753	4.9493	45.6754	0	0	0	0	132.62	178.944591	10.4265232	119.164986	8.044932588	712.7221331	12.49430131	17.45396844	23	15	25	15	4.734184539	-9.208718721	-4.9355	256	31	78.58007412	198.0228	2998	16896	1	ERROR	2	109	6	6	34	35	27	31	3	3	45	49	16	17	2
C16306	C27H31O16	74	611.5254	611.1612099	53.0295	5.1095	41.861	0	0	0	0	94.91	127.3977256	8.479090516	83.97352911	6.276821255	503.7147125	11.15345296	16.60538775	15	11	15	11	6.753936211	-2.54577838	-1.7297	256	25	57.76202555	148.6708	4266	1024	1	1024	1	78	5	5	28	29	15	18	2	3	27	30	16	17	2
C16309	C12H20O3	35	212.2854	212.1412445	67.8937	9.4961	22.6102	0	0	0	0	21.52	77.33284929	9.100165808	27.41862447	3.462409447	220.3930254	7.079938875	18.02803323	3	1	5	1	0.418384755	1.02590966	2.99727359	4	16	23.177844	60.5129	9	2	2	1	8	34	0	0	0	0	15	14	0	0	15	14	0	0	0
C16311	C12H20O3	35	212.2854	212.1412445	67.8937	9.4961	22.6102	0	0	0	0	24.09	75.65348811	8.003974536	34.00178362	4.331288842	220.3509924	6.560458927	15.9550604	3	1	5	1	NaN	0.6344808	2.637528444	8	16	23.177844	60.5362	6	2	2	1	8	34	0	0	0	0	15	14	0	0	15	14	0	0	0
C16312	C27H31O17	75	627.5248	627.1561246	51.6775	4.9793	43.3433	0	0	0	0	127.61	145.2209376	8.653714063	83.33280157	6.820410539	513.9259724	10.91373991	15.63050114	16	12	16	12	7.055738322	-3.168375278	-2.5607	256	26	58.43270372	150.3828	3006	1024	1	1024	1	79	5	5	28	29	16	19	2	3	28	31	16	17	2
C16315	C27H31O16	74	611.5254	611.1612099	53.0295	5.1095	41.861	0	0	0	0	97.69	129.3751543	8.298161525	91.20000216	7.230261769	503.7982628	11.29313787	16.36992102	15	11	15	11	6.467220655	-1.814383533	-0.9285	256	24	57.75039482	149.108	3098	1024	1	1024	1	78	5	5	28	29	15	18	2	3	27	30	16	17	2
C16356	C7H8N4O3	22	196.1634	196.0596401	42.8596	4.1106	24.4685	28.5613	0	0	0	48.59	59.66653377	5.267299002	25.61258289	3.948367325	154.1243211	4.226143304	10.11838465	3	2	6	2	NaN	-1.124778342	-1.096840804	8	4	16.91411075	55.422	99	1	1	1	8	23	2	2	9	10	5	5	0	2	5	5	9	10	0
C16358	C6H6N4O2	18	166.1374	166.0490755	43.3763	3.6401	19.2604	33.7232	0	0	0	39.84	51.39213632	4.980718314	25.2860946	3.963235579	128.990275	4.2646697	9.53189383	3	2	5	2	3.586717655	-0.028077005	0.016612274	16	8	14.32038781	41.8186	92	1	1	1	8	19	2	2	9	10	3	3	0	2	3	3	9	10	0
C16391	C7H5N3O6	21	227.1311	227.0178349	37.016	2.2189	42.2648	18.5004	0	0	0	44.74	61.7177281	4.973710077	32.90427879	4.7846734	167.8528686	4.632390114	9.656874077	6	0	12	0	NaN	2.306619773	2.306619773	4	4	18.07680453	53.0733	96	1	1	1	1	21	1	1	6	6	10	10	0	1	10	10	6	6	1
C16392	C7H7N3O5	22	213.1476	213.0385703	39.4445	3.3102	37.5313	19.7141	0	0	0	40.84	60.89132482	5.150107267	32.35263939	4.520215763	164.7182189	4.858307509	9.876838296	6	2	10	2	8.105604036	1.87482586	1.874905493	4	16	17.85024421	52.7358	77	1	1	1	1	22	1	1	6	6	9	9	0	1	9	9	6	6	1
C16393	C7H7N3O5	22	213.1476	213.0385703	39.4445	3.3102	37.5313	19.7141	0	0	0	39.01	62.48471345	5.145844385	31.91877263	4.819094092	164.9227555	4.634768853	9.336935443	6	2	10	2	7.423274901	1.874887411	1.874905493	4	16	17.84960167	52.7358	142	1	1	1	1	22	1	1	6	6	9	9	0	1	9	9	6	6	1
C16406	C21H22O10	53	434.3934	434.1212969	58.0637	5.1047	36.8316	0	0	0	0	73.1	111.8602293	7.867512204	55.88014729	5.822838117	367.579196	7.546507455	15.54833934	10	7	11	7	2.44834006	0.990698979	1.057995929	256	18	41.48903218	106.945	439	64	2	32	2	55	3	3	18	18	13	15	1	2	19	21	12	12	2
C16416	C20H20O5	45	340.3698	340.1310738	70.5744	5.9226	23.503	0	0	0	0	71.03	105.639863	9.018292163	45.05448831	4.689560629	309.5395477	7.304537562	17.28849496	5	4	6	4	NaN	5.608745419	5.704631022	64	32	36.71292593	99.0434	439	2	2	1	2	46	2	2	12	12	13	14	0	2	13	14	12	12	2
C16417	C21H22O5	48	354.3964	354.1467238	71.1702	6.257	22.5727	0	0	0	0	76.98	108.3862115	9.043243746	49.85490943	5.187769729	327.1386607	7.439546404	17.54497074	5	3	6	3	1.354875311	5.111468216	5.200525078	64	32	38.62525775	103.5257	439	2	2	1	2	49	2	2	12	12	14	15	0	2	14	15	12	12	2
C16440	C6H14N2O2	24	146.1876	146.1055277	49.2957	9.6528	21.8889	19.1626	0	0	0	10.24	50.46275431	6.080917571	23.35349352	3.184966654	147.8154603	5.835935654	12.11168231	4	3	5	5	9.822775995	-5.759850589	-3.756600997	16	16	15.365045	37.8095	3	2	1	2	4	23	0	0	0	0	10	9	0	0	10	9	0	0	0
C16443	C16H23N5O6	50	381.3837	381.1648335	50.3879	6.0786	25.1706	18.363	0	0	0	67.14	95.65756315	6.537001616	65.05429066	6.497656359	328.4826275	10.00205271	12.52220884	10	6	10	6	8.682847101	-2.387006097	-2.3815773	256	16	36.58677866	97.1646	82	64	2	32	3	52	3	3	15	16	12	13	1	2	18	19	9	10	0
C16448	C16H25N5O6	52	383.3996	383.1804836	50.123	6.5724	25.0382	18.2665	0	0	0	66.38	102.0330422	9.468143698	54.79425005	4.849385847	336.4491483	8.220406343	18.42783438	10	6	10	6	7.598825304	-1.761641397	-1.74795107	256	16	36.9042606	94.7799	79	64	1	64	8	54	3	3	15	16	12	13	1	2	18	19	9	10	0
C16461	C10H16O2	28	168.2328	168.1150298	71.3933	9.5861	19.0205	0	0	0	0	43.99	57.91062887	6.305437486	33.27119477	3.95274605	176.5350177	6.358841679	12.43007031	2	1	3	1	NaN	1.079006958	2.822657834	2	2	19.17391304	51.0495	4	2	2	1	6	27	0	0	0	0	12	11	0	0	12	11	0	0	0
C16462	C10H18O2	30	170.2487	170.1306798	70.548	10.6567	18.7953	0	0	0	0	26.87	59.08041409	6.309759018	34.4207403	4.109925883	184.3829306	6.669500119	12.53639387	2	1	3	1	NaN	1.059693687	2.868492169	2	4	19.4148766	50.2228	3	2	1	2	2	29	0	0	0	0	12	11	0	0	12	11	0	0	0
C16464	C31H52N7O17P3S	111	919.768	919.2353235	40.481	5.6985	29.5716	10.66	10.1027	3.4862	0	265.39	186.1594731	11.11872817	98.39944433	7.1088132	759.0484316	14.08796755	22.13168051	17	9	23	10	2.120196387	-8.696003758	-4.063031356	256	23	82.92843431	209.7871	5000	256	1	256	36	113	3	3	14	15	45	46	1	2	50	51	9	10	0
C16465	C31H50N7O17P3S	109	917.752	917.2196734	40.57	5.4914	29.6365	10.6834	10.1249	3.4939	0	316.73	202.9409406	11.84332711	106.8898081	7.462616001	753.0495092	12.33492584	23.56830034	17	9	23	10	2.120196383	-8.508504759	-3.875532358	256	23	82.67452679	210.6138	5000	256	2	128	36	111	3	3	14	15	45	46	1	2	50	51	9	10	0
C16470	C28H46N7O17P3S	102	877.688	877.1883733	38.3165	5.2827	30.9893	11.171	10.5871	3.6533	0	261.08	174.0462165	12.24955065	92.42820505	7.087967946	708.0916636	11.03693885	24.3166029	17	9	23	10	2.120196387	-9.872160184	-5.239187782	256	23	77.4992119	196.0365	5000	128	1	128	36	104	3	3	14	15	42	43	1	2	47	48	9	10	0
C16476	C6H5FO4	16	160.0999	160.0171869	45.012	3.1478	39.9735	0	0	0	11.8666	24.59	43.38861383	4.563087497	26.98383958	3.484160144	120.5616997	5.934432973	9.013187433	3	1	5	1	NaN	-2.219742762	0.882025511	16	8	12.16295911	31.788	12	2	1	2	2	16	1	1	5	5	6	6	1	0	11	11	0	0	0
C16477	C6H5FO4	16	160.0999	160.0171869	45.012	3.1478	39.9735	0	0	0	11.8666	25.13	44.47353143	4.822731249	26.10595644	3.376460875	120.5663274	5.413737052	9.615283003	3	1	5	1	NaN	-6.032226037	0.487312017	16	16	12.1608242	31.3477	12	4	1	4	2	16	1	1	5	5	6	6	1	0	11	11	0	0	0
C16488	C12H24N2O7	45	308.3282	308.1583511	46.7451	7.8457	36.3236	9.0856	0	0	0	27.84	84.34001784	8.305618893	41.15229942	4.708924484	287.2326286	8.754254257	16.07582428	9	7	11	8	8.625969895	-6.480730531	-5.631993821	256	14	29.15485918	71.8846	6	16	1	16	44	44	0	0	0	0	21	20	0	0	21	20	0	0	0
C16489	C12H25N2O10P	50	388.3081	388.1246815	37.117	6.4893	41.2028	7.2142	7.9766	0	0	71.11	96.39000218	9.497497248	57.58673341	5.865014393	332.0755237	9.277048353	18.74493325	11	8	14	9	4.083175108	-9.578208374	-9.309891315	256	14	33.69040225	82.7575	24	16	1	16	40	49	0	0	0	0	25	24	0	0	25	24	0	0	0
C16496	C27H44O6	77	464.6347	464.3137891	69.7944	9.545	20.6606	0	0	0	0	134.53	121.7206617	9.164096142	58.24647395	5.16281379	465.5906215	8.45721588	18.4107491	6	5	7	5	5.540488278	1.691208105	1.69120824	256	256	50.4889903	127.4247	3	1024	1	1024	5	80	4	4	17	20	16	16	4	0	33	36	0	0	4
C16499	C27H44O7	78	480.6341	480.3087038	67.4711	9.2273	23.3017	0	0	0	0	126.21	122.4895957	9.271035014	63.43586225	6.013271436	473.9582726	7.562070589	17.79915411	7	6	8	6	5.433162649	0.6442981	0.644298273	256	17	51.13234174	128.9684	3	2048	1	2048	5	81	4	4	17	20	17	17	4	0	34	37	0	0	4
C16500	C27H44O8	79	496.6335	496.3036184	65.2974	8.93	25.7726	0	0	0	0	133.82	124.3101648	9.369362441	62.99425673	5.723997591	482.6118266	7.823484655	18.65039624	8	7	9	7	5.358943688	-0.43704804	-0.437047762	256	19	51.78386495	130.4195	3	2048	1	2048	5	82	4	4	17	20	18	18	4	0	35	38	0	0	4
C16504	C15H24O3	42	252.3493	252.1725446	71.3933	9.5861	19.0205	0	0	0	0	165.32	90.6537289	8.365678845	38.54724053	4.72237903	258.9706326	7.145307808	16.73325464	3	1	4	1	0.429209749	1.571847989	3.503636871	4	4	28.34602852	73.6896	4	8	4	2	9	42	1	1	3	3	15	15	1	0	18	18	0	0	0
[truncated: 35 more columns]
