# Supplementary material for: Prediction of Substrate-Enzyme-Product Interaction Based on Molecular Descriptors and Physicochemical Properties
Source: Biomed Res Int. 2013 Dec 22;2013:674215. doi: 10.1155/2013/674215 (PMC3881445; doi:10.1155/2013/674215)
Supplement: Supplementary file 1 — Supplementary Material 1： The ID of 1326 compounds and 939 enzymes of metabolic pathway in Kegg database. Supplementary Material 2：14,592 networking triads of substrate-enzyme-product. Supplementary Material 3: 729,600 non-networking triads of substrate-enzyme-product. Supplementary Material 4: Calculated value of molecular descriptors of 1326 compounds and the categories. Supplementary Material 5: The value of 132 physicochemical descriptors for 939 enzyme. Supplementary Material 6: The MaxRel and mRMR feature tables using mRMR method. [file 674215.f1.zip › 674215.f1/supplemental material V.txt]

The value of 132 physicochemical descriptors for 939 enzyme

>Q0010
0.117188 0.375000 0.507812 0.086614 0.118110 0.267717 0.070312 0.242188 0.382812 0.656250 0.968750 0.015625 0.359375 0.578125 0.820312 1.000000 0.007812 0.171875 0.398438 0.718750 0.992188 0.242188 0.085938 0.671875 0.039370 0.039370 0.007874 0.007812 0.242188 0.546875 0.898438 1.000000 0.203125 0.210938 0.515625 0.945312 0.968750 0.015625 0.289062 0.460938 0.710938 0.882812 0.695312 0.188976 0.015625 0.265625 0.523438 0.750000 0.976562 0.234375 0.398438 0.367188 0.125984 0.086614 0.346457 0.156250 0.531250 0.601562 0.890625 1.000000 0.031250 0.171875 0.398438 0.656250 0.992188 0.007812 0.257812 0.460938 0.718750 0.945312 0.679688 0.203125 0.117188 0.157480 0.165354 0.039370 0.007812 0.187500 0.421875 0.718750 0.992188 0.156250 0.539062 0.601562 0.898438 1.000000 0.070312 0.242188 0.382812 0.656250 0.968750 0.156250 0.476562 0.367188 0.181102 0.078740 0.354331 0.156250 0.531250 0.601562 0.812500 1.000000 0.031250 0.203125 0.429688 0.703125 0.992188 0.007812 0.257812 0.460938 0.718750 0.945312 0.007812 0.015625 0.007812 0.023438 0.000000 0.062500 0.031250 0.000000 0.062500 0.039062 0.070312 0.000000 0.171875 0.007812 0.062500 0.101562 0.164062 0.070312 0.085938 0.015625 
>Q0045
0.144195 0.423221 0.432584 0.116323 0.116323 0.365854 0.005618 0.271536 0.565543 0.844569 0.998127 0.013109 0.250936 0.509363 0.719101 1.000000 0.001873 0.220974 0.464419 0.722846 0.996255 0.299625 0.028090 0.672285 0.024390 0.095685 0.001876 0.001873 0.237828 0.531835 0.897004 1.000000 0.621723 0.754682 0.900749 0.940075 0.947566 0.003745 0.267790 0.471910 0.694757 0.996255 0.855805 0.131332 0.009363 0.239700 0.488764 0.719101 0.992509 0.374532 0.374532 0.250936 0.262664 0.178236 0.210131 0.014981 0.245318 0.492509 0.719101 1.000000 0.003745 0.224719 0.475655 0.771536 0.998127 0.001873 0.284644 0.533708 0.737828 0.986891 0.477528 0.348315 0.174157 0.317073 0.161351 0.116323 0.001873 0.237828 0.483146 0.730337 0.996255 0.014981 0.239700 0.488764 0.715356 1.000000 0.005618 0.284644 0.558052 0.822097 0.998127 0.325843 0.423221 0.250936 0.264540 0.153846 0.234522 0.014981 0.239700 0.503745 0.692884 1.000000 0.003745 0.224719 0.468165 0.773408 0.998127 0.001873 0.284644 0.533708 0.737828 0.986891 0.016854 0.018727 0.016854 0.024345 0.016854 0.050562 0.080524 0.082397 0.080524 0.058052 0.046816 0.029963 0.044944 0.001873 0.071161 0.127341 0.091760 0.039326 0.082397 0.018727 
>Q0050
0.329736 0.328537 0.341727 0.205282 0.246098 0.214886 0.003597 0.292566 0.538369 0.763789 0.994005 0.008393 0.212230 0.514388 0.755396 0.998801 0.001199 0.221823 0.460432 0.709832 1.000000 0.448441 0.101918 0.449640 0.045618 0.074430 0.002401 0.001199 0.252998 0.510791 0.761391 1.000000 0.116307 0.375300 0.635492 0.703837 0.943645 0.002398 0.177458 0.474820 0.741007 0.986811 0.577938 0.338535 0.005995 0.170264 0.453237 0.725420 0.996403 0.317746 0.351319 0.330935 0.216086 0.199280 0.237695 0.009592 0.220624 0.489209 0.725420 0.998801 0.002398 0.243405 0.478417 0.732614 0.994005 0.001199 0.284173 0.520384 0.784173 1.000000 0.388489 0.261391 0.350120 0.186074 0.291717 0.171669 0.001199 0.227818 0.482014 0.741007 1.000000 0.009592 0.208633 0.472422 0.723022 0.998801 0.003597 0.293765 0.546763 0.772182 0.994005 0.266187 0.402878 0.330935 0.222089 0.164466 0.272509 0.009592 0.208633 0.461631 0.712230 0.998801 0.002398 0.254197 0.501199 0.741007 0.997602 0.001199 0.284173 0.520384 0.784173 1.000000 0.055156 0.099520 0.034772 0.040767 0.016787 0.082734 0.061151 0.037170 0.053957 0.073141 0.035971 0.020384 0.046763 0.015588 0.049161 0.089928 0.077938 0.063549 0.035971 0.009592 
>Q0055
0.316159 0.327869 0.355972 0.199297 0.236811 0.236811 0.003513 0.318501 0.537471 0.735363 0.995316 0.008197 0.204918 0.455504 0.756440 0.998829 0.001171 0.208431 0.488290 0.751756 1.000000 0.418033 0.113583 0.468384 0.053927 0.065651 0.000000 0.001171 0.254098 0.455504 0.745902 1.000000 0.230679 0.484778 0.703747 0.750585 0.947307 0.002342 0.187354 0.476581 0.687354 0.989461 0.593677 0.332943 0.005855 0.162763 0.425059 0.688525 0.994145 0.309133 0.375878 0.314988 0.233294 0.200469 0.239156 0.009368 0.227166 0.467213 0.749415 0.998829 0.002342 0.244731 0.482436 0.709602 1.000000 0.001171 0.285714 0.537471 0.775176 0.994145 0.402810 0.245902 0.351288 0.208675 0.290739 0.166471 0.001171 0.213115 0.494145 0.752927 1.000000 0.009368 0.195550 0.418033 0.728337 0.998829 0.003513 0.313817 0.539813 0.747073 0.995316 0.255269 0.429742 0.314988 0.228605 0.165299 0.274326 0.009368 0.227166 0.456674 0.737705 0.998829 0.002342 0.236534 0.482436 0.722482 1.000000 0.001171 0.285714 0.537471 0.775176 0.994145 0.052693 0.086651 0.036300 0.038642 0.015222 0.086651 0.060890 0.035129 0.073770 0.046838 0.029274 0.035129 0.046838 0.024590 0.058548 0.103044 0.076112 0.042155 0.044496 0.007026 
>Q0060
0.330120 0.337349 0.332530 0.217391 0.214976 0.207729 0.007229 0.303614 0.542169 0.759036 1.000000 0.016867 0.255422 0.510843 0.746988 0.990361 0.002410 0.171084 0.433735 0.718072 0.992771 0.428916 0.190361 0.380723 0.067633 0.077295 0.009662 0.002410 0.289157 0.542169 0.701205 1.000000 0.200000 0.342169 0.587952 0.677108 0.971084 0.004819 0.134940 0.440964 0.836145 0.992771 0.636145 0.294686 0.009639 0.187952 0.460241 0.715663 0.987952 0.286747 0.412048 0.301205 0.190821 0.195652 0.258454 0.019277 0.257831 0.496386 0.720482 0.987952 0.004819 0.226506 0.455422 0.739759 0.997590 0.002410 0.269880 0.530120 0.792771 1.000000 0.407229 0.248193 0.344578 0.188406 0.282609 0.164251 0.002410 0.204819 0.450602 0.734940 0.992771 0.019277 0.187952 0.493976 0.722892 0.987952 0.007229 0.289157 0.539759 0.763855 1.000000 0.262651 0.436145 0.301205 0.193237 0.173913 0.280193 0.019277 0.257831 0.520482 0.727711 0.987952 0.004819 0.231325 0.453012 0.715663 0.997590 0.002410 0.269880 0.530120 0.792771 1.000000 0.033735 0.079518 0.036145 0.031325 0.021687 0.127711 0.055422 0.048193 0.069880 0.057831 0.016867 0.014458 0.074699 0.007229 0.053012 0.113253 0.060241 0.045783 0.038554 0.014458 
>Q0065
0.273381 0.329137 0.397482 0.156757 0.201802 0.264865 0.005396 0.478417 0.654676 0.843525 1.000000 0.012590 0.210432 0.402878 0.697842 0.980216 0.001799 0.203237 0.428058 0.683453 0.994604 0.329137 0.116906 0.553957 0.043243 0.108108 0.014414 0.001799 0.237410 0.541367 0.776978 1.000000 0.467626 0.631295 0.762590 0.818345 0.937050 0.003597 0.190647 0.402878 0.645683 0.991007 0.712230 0.255856 0.008993 0.201439 0.417266 0.676259 0.994604 0.314748 0.386691 0.298561 0.241441 0.162162 0.241441 0.014388 0.217626 0.404676 0.692446 0.980216 0.003597 0.244604 0.505396 0.742806 0.998201 0.001799 0.332734 0.543165 0.787770 1.000000 0.438849 0.273381 0.287770 0.234234 0.246847 0.129730 0.001799 0.212230 0.447842 0.721223 0.994604 0.014388 0.208633 0.368705 0.665468 0.980216 0.005396 0.456835 0.642086 0.838129 1.000000 0.284173 0.417266 0.298561 0.225225 0.145946 0.257658 0.014388 0.221223 0.410072 0.692446 0.980216 0.003597 0.235612 0.485612 0.742806 0.998201 0.001799 0.332734 0.543165 0.787770 1.000000 0.023381 0.079137 0.023381 0.035971 0.028777 0.082734 0.064748 0.052158 0.071942 0.059353 0.025180 0.014388 0.041367 0.005396 0.053957 0.120504 0.077338 0.053957 0.064748 0.021583 
>Q0070
0.228571 0.353968 0.417460 0.147854 0.174881 0.290938 0.004762 0.473016 0.611111 0.814286 1.000000 0.011111 0.209524 0.422222 0.690476 0.993651 0.001587 0.234921 0.452381 0.746032 0.998413 0.352381 0.077778 0.569841 0.030207 0.081081 0.014308 0.001587 0.273016 0.568254 0.760317 1.000000 0.576190 0.628571 0.774603 0.877778 0.944444 0.003175 0.226984 0.400000 0.722222 0.995238 0.811111 0.219396 0.007937 0.223810 0.465079 0.712698 0.993651 0.304762 0.382540 0.312698 0.203498 0.193959 0.255962 0.012698 0.200000 0.401587 0.680952 0.980952 0.003175 0.247619 0.507937 0.731746 1.000000 0.001587 0.350794 0.579365 0.796825 0.996825 0.479365 0.268254 0.252381 0.246423 0.232114 0.122417 0.001587 0.252381 0.492063 0.755556 0.998413 0.012698 0.195238 0.360317 0.642857 0.971429 0.004762 0.385714 0.603175 0.793651 1.000000 0.253968 0.433333 0.312698 0.181240 0.162162 0.287758 0.012698 0.196825 0.380952 0.663492 0.980952 0.003175 0.242857 0.507937 0.736508 1.000000 0.001587 0.350794 0.579365 0.796825 0.996825 0.028571 0.060317 0.022222 0.025397 0.015873 0.076190 0.063492 0.042857 0.068254 0.053968 0.039683 0.023810 0.061905 0.011111 0.057143 0.119048 0.092063 0.066667 0.057143 0.014286 
>Q0075
0.358757 0.290960 0.350282 0.192635 0.257790 0.192635 0.031073 0.248588 0.511299 0.762712 1.000000 0.028249 0.257062 0.491525 0.731638 0.988701 0.002825 0.194915 0.454802 0.776836 0.997175 0.395480 0.206215 0.398305 0.065156 0.070822 0.002833 0.002825 0.217514 0.519774 0.728814 1.000000 0.008475 0.302260 0.418079 0.638418 0.974576 0.039548 0.220339 0.485876 0.822034 0.988701 0.593220 0.373938 0.005650 0.248588 0.454802 0.689266 0.997175 0.228814 0.420904 0.350282 0.178470 0.138810 0.317280 0.028249 0.262712 0.471751 0.700565 0.983051 0.005650 0.217514 0.488701 0.824859 1.000000 0.002825 0.271186 0.500000 0.740113 0.988701 0.437853 0.189266 0.372881 0.155807 0.345609 0.121813 0.002825 0.209040 0.466102 0.745763 0.997175 0.028249 0.251412 0.471751 0.728814 0.983051 0.031073 0.279661 0.519774 0.771186 1.000000 0.197740 0.451977 0.350282 0.172805 0.116147 0.339943 0.028249 0.276836 0.548023 0.703390 0.983051 0.005650 0.209040 0.468927 0.802260 1.000000 0.002825 0.271186 0.500000 0.740113 0.988701 0.019774 0.115819 0.050847 0.033898 0.028249 0.110169 0.039548 0.028249 0.042373 0.053672 0.025424 0.014124 0.087571 0.005650 0.022599 0.135593 0.073446 0.045198 0.059322 0.008475 
>Q0085
0.138996 0.351351 0.509653 0.093023 0.124031 0.391473 0.011583 0.135135 0.297297 0.664093 0.980695 0.027027 0.254826 0.509653 0.729730 1.000000 0.003861 0.270270 0.521236 0.772201 0.996139 0.270270 0.050193 0.679537 0.023256 0.069767 0.000000 0.003861 0.104247 0.231660 0.455598 1.000000 0.019305 0.027027 0.061776 0.073359 0.247104 0.127413 0.397683 0.637066 0.806950 0.984556 0.814672 0.124031 0.007722 0.247104 0.482625 0.710425 0.988417 0.312741 0.447876 0.239382 0.310078 0.162791 0.224806 0.027027 0.220077 0.474903 0.710425 0.984556 0.011583 0.227799 0.505792 0.756757 0.996139 0.003861 0.308880 0.478764 0.764479 1.000000 0.552124 0.293436 0.154440 0.364341 0.143411 0.093023 0.003861 0.266409 0.517375 0.772201 0.996139 0.027027 0.254826 0.509653 0.725869 0.984556 0.011583 0.223938 0.324324 0.691120 1.000000 0.277992 0.482625 0.239382 0.282946 0.151163 0.236434 0.027027 0.220077 0.474903 0.729730 0.984556 0.011583 0.227799 0.505792 0.737452 0.996139 0.003861 0.308880 0.478764 0.764479 1.000000 0.015444 0.019305 0.015444 0.015444 0.019305 0.054054 0.065637 0.057915 0.069498 0.069498 0.030888 0.015444 0.042471 0.003861 0.050193 0.177606 0.131274 0.042471 0.084942 0.019305 
>Q0105
0.148052 0.374026 0.477922 0.117188 0.119792 0.361979 0.010390 0.184416 0.462338 0.748052 1.000000 0.005195 0.249351 0.454545 0.690909 0.989610 0.002597 0.288312 0.516883 0.781818 0.994805 0.280519 0.020779 0.698701 0.018229 0.080729 0.002604 0.002597 0.277922 0.561039 0.711688 1.000000 0.054545 0.057143 0.355844 0.568831 0.672727 0.007792 0.241558 0.467532 0.766234 0.987013 0.638961 0.416667 0.005195 0.233766 0.493506 0.758442 0.994805 0.316883 0.392208 0.290909 0.268229 0.174479 0.200521 0.005195 0.259740 0.454545 0.693506 0.989610 0.018182 0.262338 0.540260 0.784416 0.997403 0.002597 0.236364 0.475325 0.735065 1.000000 0.532468 0.285714 0.181818 0.294271 0.177083 0.117188 0.002597 0.262338 0.509091 0.776623 0.994805 0.005195 0.259740 0.454545 0.693506 0.989610 0.010390 0.189610 0.475325 0.735065 1.000000 0.257143 0.451948 0.290909 0.236979 0.148438 0.226562 0.005195 0.223377 0.433766 0.688312 0.989610 0.018182 0.293506 0.550649 0.779221 0.997403 0.002597 0.236364 0.475325 0.735065 1.000000 0.028571 0.018182 0.012987 0.020779 0.015584 0.051948 0.064935 0.057143 0.072727 0.041558 0.049351 0.033766 0.054545 0.010390 0.096104 0.111688 0.103896 0.044156 0.093506 0.018182 
>Q0110
0.257683 0.347518 0.394799 0.187204 0.196682 0.281991 0.009456 0.368794 0.567376 0.761229 0.995272 0.004728 0.226950 0.510638 0.749409 0.997636 0.002364 0.219858 0.413712 0.721040 1.000000 0.373522 0.108747 0.517730 0.047393 0.066351 0.009479 0.002364 0.494090 0.647754 0.829787 1.000000 0.049645 0.661939 0.728132 0.839243 0.985816 0.007092 0.189125 0.342790 0.484634 0.983452 0.739953 0.255924 0.007092 0.229314 0.423168 0.702128 0.990544 0.281324 0.368794 0.349882 0.206161 0.206161 0.274882 0.004728 0.231678 0.529551 0.773050 0.992908 0.016548 0.267139 0.508274 0.756501 1.000000 0.002364 0.250591 0.463357 0.725768 0.997636 0.479905 0.241135 0.278960 0.220379 0.263033 0.149289 0.002364 0.229314 0.439716 0.725768 1.000000 0.004728 0.205674 0.513002 0.754137 0.992908 0.009456 0.340426 0.562648 0.756501 0.995272 0.241135 0.408983 0.349882 0.189573 0.184834 0.296209 0.004728 0.205674 0.510638 0.749409 0.992908 0.016548 0.267139 0.515366 0.763593 1.000000 0.002364 0.250591 0.463357 0.725768 0.997636 0.023641 0.080378 0.018913 0.023641 0.021277 0.089835 0.066194 0.030733 0.068558 0.052009 0.023641 0.021277 0.085106 0.016548 0.040189 0.099291 0.099291 0.080378 0.040189 0.018913 
>Q0115
0.284333 0.315280 0.400387 0.164729 0.218992 0.255814 0.007737 0.400387 0.617021 0.810445 0.998066 0.003868 0.199226 0.468085 0.736944 1.000000 0.001934 0.230174 0.425532 0.702128 0.992263 0.357834 0.098646 0.543520 0.038760 0.089147 0.019380 0.001934 0.413926 0.626692 0.816248 1.000000 0.040619 0.535783 0.620890 0.793037 0.901354 0.005803 0.185687 0.363636 0.636364 0.969052 0.636364 0.375969 0.003868 0.234043 0.468085 0.721470 0.992263 0.255319 0.386847 0.357834 0.207364 0.172481 0.277132 0.003868 0.208897 0.481625 0.750484 0.996132 0.013540 0.266925 0.500967 0.754352 0.992263 0.001934 0.272727 0.497099 0.738878 1.000000 0.485493 0.210832 0.303675 0.211240 0.284884 0.114341 0.001934 0.234043 0.446809 0.713733 1.000000 0.003868 0.193424 0.355899 0.756286 0.996132 0.007737 0.379110 0.595745 0.771760 0.998066 0.216634 0.425532 0.357834 0.187984 0.141473 0.308140 0.003868 0.201161 0.470019 0.735010 0.976789 0.013540 0.261122 0.506770 0.754352 0.996132 0.001934 0.272727 0.497099 0.738878 1.000000 0.025145 0.088975 0.023211 0.032882 0.017408 0.096712 0.050290 0.029014 0.061896 0.042553 0.027079 0.019342 0.085106 0.011605 0.044487 0.090909 0.114120 0.063830 0.054159 0.021277 
>Q0120
0.289969 0.324451 0.385580 0.172684 0.215071 0.241758 0.006270 0.462382 0.623824 0.793103 1.000000 0.003135 0.200627 0.410658 0.719436 0.982759 0.001567 0.211599 0.412226 0.694357 0.995298 0.319749 0.152038 0.528213 0.070644 0.061224 0.007849 0.001567 0.333856 0.573668 0.808777 1.000000 0.032915 0.619122 0.766458 0.841693 0.946708 0.004702 0.183386 0.365204 0.595611 0.995298 0.598746 0.411303 0.003135 0.213166 0.451411 0.746082 0.995298 0.278997 0.390282 0.330721 0.222920 0.163265 0.252747 0.003135 0.214734 0.429467 0.714734 0.982759 0.010972 0.271160 0.492163 0.733542 1.000000 0.001567 0.264890 0.521944 0.793103 0.995298 0.452978 0.231975 0.315047 0.200942 0.281005 0.138148 0.001567 0.213166 0.424765 0.716301 0.995298 0.003135 0.200627 0.391850 0.705329 0.982759 0.006270 0.427900 0.605016 0.788401 1.000000 0.242947 0.426332 0.330721 0.202512 0.149137 0.266876 0.003135 0.214734 0.451411 0.714734 0.982759 0.010972 0.268025 0.481191 0.738245 1.000000 0.001567 0.264890 0.521944 0.793103 0.995298 0.031348 0.079937 0.020376 0.032915 0.028213 0.097179 0.051724 0.043887 0.064263 0.050157 0.021944 0.025078 0.067398 0.014107 0.056426 0.098746 0.089342 0.036050 0.068966 0.021944 
>Q0130
0.105263 0.407895 0.486842 0.106667 0.053333 0.453333 0.026316 0.105263 0.513158 0.578947 0.776316 0.078947 0.197368 0.407895 0.671053 0.986842 0.013158 0.263158 0.565789 0.842105 1.000000 0.052632 0.000000 0.947368 0.000000 0.053333 0.000000 0.013158 0.013158 0.513158 0.526316 1.000000 0 0 0 0 0 0.026316 0.250000 0.486842 0.750000 0.986842 0.789474 0.186667 0.039474 0.263158 0.460526 0.750000 0.947368 0.421053 0.407895 0.171053 0.400000 0.160000 0.146667 0.078947 0.236842 0.473684 0.710526 0.986842 0.026316 0.223684 0.447368 0.750000 1.000000 0.013158 0.118421 0.578947 0.723684 0.973684 0.500000 0.394737 0.105263 0.440000 0.066667 0.093333 0.013158 0.250000 0.565789 0.842105 1.000000 0.078947 0.210526 0.421053 0.671053 0.986842 0.026316 0.105263 0.513158 0.578947 0.776316 0.381579 0.447368 0.171053 0.386667 0.120000 0.186667 0.078947 0.210526 0.407895 0.671053 0.986842 0.026316 0.250000 0.486842 0.750000 1.000000 0.013158 0.118421 0.578947 0.723684 0.973684 0.013158 0.026316 0.013158 0.013158 0.013158 0.026316 0.131579 0.131579 0.065789 0.039474 0.026316 0.000000 0.013158 0.013158 0.078947 0.157895 0.118421 0.039474 0.078947 0.000000 
>Q0140
0.467337 0.206030 0.326633 0.176322 0.327456 0.141058 0.005025 0.248744 0.477387 0.728643 0.994975 0.027638 0.301508 0.555276 0.819095 0.977387 0.002513 0.211055 0.457286 0.698492 1.000000 0.429648 0.150754 0.419598 0.047859 0.073048 0.007557 0.002513 0.248744 0.575377 0.846734 1.000000 0.055276 0.374372 0.527638 0.896985 0.994975 0.005025 0.135678 0.439698 0.650754 0.869347 0.706030 0.307305 0.007538 0.301508 0.512563 0.736181 0.992462 0.150754 0.555276 0.293970 0.153652 0.083123 0.317380 0.027638 0.195980 0.547739 0.819095 0.972362 0.007538 0.248744 0.487437 0.728643 1.000000 0.002513 0.251256 0.452261 0.731156 0.997487 0.396985 0.123116 0.479899 0.100756 0.403023 0.090680 0.002513 0.261307 0.489950 0.731156 1.000000 0.027638 0.193467 0.545226 0.836683 0.972362 0.005025 0.241206 0.474874 0.728643 0.994975 0.130653 0.575377 0.293970 0.141058 0.075567 0.324937 0.027638 0.238693 0.555276 0.824121 0.972362 0.007538 0.243719 0.487437 0.728643 1.000000 0.002513 0.251256 0.452261 0.731156 0.997487 0.012563 0.095477 0.005025 0.025126 0.010050 0.319095 0.025126 0.007538 0.040201 0.032663 0.017588 0.012563 0.070352 0.002513 0.012563 0.103015 0.105528 0.082915 0.012563 0.007538 
>Q0160
0.361702 0.285106 0.353191 0.222222 0.243590 0.213675 0.008511 0.212766 0.468085 0.702128 1.000000 0.055319 0.280851 0.523404 0.740426 0.987234 0.004255 0.255319 0.497872 0.778723 0.995745 0.404255 0.191489 0.404255 0.072650 0.081197 0.004274 0.004255 0.191489 0.451064 0.706383 1.000000 0.200000 0.365957 0.438298 0.800000 0.948936 0.034043 0.272340 0.493617 0.740426 0.936170 0.506383 0.316239 0.017021 0.285106 0.519149 0.727660 0.991489 0.251064 0.434043 0.314894 0.205128 0.179487 0.282051 0.055319 0.234043 0.480851 0.697872 0.987234 0.012766 0.178723 0.497872 0.744681 0.995745 0.004255 0.263830 0.493617 0.765957 1.000000 0.417021 0.204255 0.378723 0.166667 0.290598 0.166667 0.004255 0.263830 0.544681 0.795745 0.995745 0.055319 0.234043 0.523404 0.706383 0.987234 0.008511 0.217021 0.451064 0.693617 1.000000 0.200000 0.485106 0.314894 0.170940 0.145299 0.316239 0.055319 0.217021 0.459574 0.663830 0.987234 0.012766 0.221277 0.502128 0.761702 0.995745 0.004255 0.263830 0.493617 0.765957 1.000000 0.017021 0.110638 0.051064 0.034043 0.042553 0.106383 0.042553 0.029787 0.051064 0.042553 0.038298 0.017021 0.063830 0.012766 0.046809 0.110638 0.076596 0.038298 0.046809 0.021277 
>Q0250
0.239044 0.350598 0.410359 0.148000 0.208000 0.268000 0.011952 0.270916 0.565737 0.788845 1.000000 0.039841 0.262948 0.498008 0.760956 0.964143 0.003984 0.215139 0.422311 0.709163 0.988048 0.374502 0.231076 0.394422 0.092000 0.052000 0.004000 0.003984 0.310757 0.609562 0.800797 1.000000 0.458167 0.517928 0.709163 0.816733 0.952191 0.011952 0.135458 0.235060 0.390438 0.996016 0.760956 0.256000 0.015936 0.258964 0.498008 0.749004 0.988048 0.346614 0.426295 0.227092 0.256000 0.144000 0.196000 0.011952 0.262948 0.545817 0.764940 0.964143 0.007968 0.215139 0.478088 0.737052 1.000000 0.003984 0.235060 0.458167 0.693227 0.984064 0.466135 0.274900 0.258964 0.248000 0.244000 0.128000 0.003984 0.223108 0.418327 0.681275 0.988048 0.039841 0.274900 0.545817 0.772908 0.964143 0.011952 0.270916 0.565737 0.780876 1.000000 0.278884 0.494024 0.227092 0.272000 0.120000 0.220000 0.011952 0.262948 0.549801 0.752988 0.956175 0.007968 0.231076 0.478088 0.760956 1.000000 0.003984 0.235060 0.458167 0.693227 0.984064 0.019920 0.031873 0.063745 0.055777 0.035857 0.031873 0.047809 0.059761 0.051793 0.063745 0.051793 0.019920 0.055777 0.015936 0.075697 0.115538 0.103586 0.031873 0.047809 0.019920 
>Q0255
0.389831 0.262712 0.347458 0.184713 0.288747 0.171975 0.006356 0.222458 0.487288 0.752119 1.000000 0.010593 0.300847 0.519068 0.750000 0.983051 0.002119 0.243644 0.483051 0.728814 0.997881 0.377119 0.211864 0.411017 0.059448 0.072187 0.004246 0.002119 0.283898 0.514831 0.815678 1.000000 0.139831 0.247881 0.506356 0.620763 0.989407 0.006356 0.116525 0.417373 0.743644 0.980932 0.593220 0.411890 0.004237 0.218220 0.495763 0.762712 0.997881 0.235169 0.421610 0.343220 0.161359 0.176221 0.276008 0.010593 0.288136 0.506356 0.741525 1.000000 0.004237 0.213983 0.487288 0.764831 0.997881 0.002119 0.237288 0.472458 0.726695 0.989407 0.425847 0.173729 0.400424 0.152866 0.350318 0.123142 0.002119 0.239407 0.476695 0.735169 0.997881 0.010593 0.305085 0.527542 0.743644 0.968220 0.006356 0.222458 0.487288 0.745763 1.000000 0.201271 0.455508 0.343220 0.159236 0.152866 0.299363 0.010593 0.260593 0.504237 0.743644 1.000000 0.004237 0.230932 0.491525 0.762712 0.997881 0.002119 0.237288 0.472458 0.726695 0.989407 0.025424 0.118644 0.023305 0.052966 0.012712 0.156780 0.031780 0.014831 0.050847 0.050847 0.025424 0.010593 0.078390 0.008475 0.029661 0.097458 0.101695 0.048729 0.042373 0.019068 
>Q0275
0.126394 0.431227 0.442379 0.108209 0.085821 0.384328 0.018587 0.249071 0.483271 0.687732 0.944238 0.007435 0.263941 0.513011 0.750929 0.996283 0.003717 0.237918 0.479554 0.762082 1.000000 0.275093 0.007435 0.717472 0.007463 0.059701 0.007463 0.003717 0.074349 0.457249 0.721190 1.000000 0.052045 0.052045 0.052045 0.052045 0.605948 0.055762 0.271375 0.546468 0.762082 0.977695 0.806691 0.216418 0.014870 0.237918 0.516729 0.750929 0.981413 0.345725 0.368030 0.286245 0.264925 0.175373 0.208955 0.007435 0.263941 0.468401 0.706320 0.996283 0.014870 0.237918 0.509294 0.710037 1.000000 0.003717 0.208178 0.460967 0.810409 0.992565 0.498141 0.319703 0.182156 0.324627 0.152985 0.108209 0.003717 0.245353 0.520446 0.791822 1.000000 0.007435 0.230483 0.475836 0.706320 0.996283 0.011152 0.182156 0.483271 0.710037 0.944238 0.304833 0.408922 0.286245 0.268657 0.149254 0.235075 0.007435 0.271375 0.501859 0.724907 0.996283 0.014870 0.234201 0.494424 0.687732 1.000000 0.003717 0.208178 0.460967 0.810409 0.992565 0.026022 0.007435 0.026022 0.018587 0.014870 0.033457 0.070632 0.081784 0.059480 0.074349 0.033457 0.055762 0.055762 0.007435 0.092937 0.133829 0.066914 0.048327 0.059480 0.033457 
>YAL001c
0.382759 0.313793 0.303448 0.224331 0.234685 0.192407 0.006897 0.261207 0.486207 0.720690 0.998276 0.003448 0.244828 0.491379 0.759483 1.000000 0.000862 0.220690 0.519828 0.788793 0.996552 0.436207 0.181897 0.381897 0.073339 0.068162 0.014668 0.000862 0.256897 0.455172 0.730172 1.000000 0.001724 0.218966 0.460345 0.727586 0.997414 0.006897 0.205172 0.548276 0.764655 0.980172 0.471552 0.384814 0.002586 0.225862 0.502586 0.789655 0.997414 0.343966 0.385345 0.270690 0.257118 0.185505 0.213978 0.003448 0.240517 0.475862 0.746552 1.000000 0.001724 0.243966 0.494828 0.785345 0.998276 0.000862 0.284483 0.523276 0.724138 0.997414 0.333621 0.269828 0.396552 0.176014 0.263158 0.206212 0.000862 0.220690 0.518103 0.787931 0.997414 0.003448 0.248276 0.487069 0.752586 1.000000 0.006897 0.259483 0.493966 0.721552 0.998276 0.312069 0.417241 0.270690 0.251079 0.165660 0.233822 0.003448 0.242241 0.475862 0.718966 1.000000 0.001724 0.243966 0.495690 0.796552 0.998276 0.000862 0.284483 0.523276 0.724138 0.997414 0.055172 0.107759 0.062931 0.068103 0.031897 0.056897 0.050862 0.044828 0.083621 0.064655 0.025862 0.013793 0.030172 0.006034 0.075000 0.083621 0.075000 0.014655 0.036207 0.012931 
>YAL002w
0.311617 0.328100 0.360283 0.202671 0.219953 0.213668 0.001570 0.317896 0.557300 0.774725 0.998430 0.003925 0.164835 0.430141 0.682889 0.997645 0.000785 0.282575 0.498430 0.756672 1.000000 0.375196 0.111460 0.513344 0.045562 0.087981 0.006284 0.000785 0.162480 0.432496 0.701727 1.000000 0.044741 0.115385 0.189168 0.313972 0.992936 0.017268 0.397959 0.629513 0.793564 0.983516 0.567504 0.372349 0.004710 0.242543 0.474882 0.722920 0.992936 0.339874 0.434066 0.226060 0.292223 0.144540 0.209741 0.003925 0.179749 0.462323 0.716641 0.997645 0.001570 0.283359 0.515699 0.758242 1.000000 0.000785 0.290424 0.511774 0.759027 0.998430 0.399529 0.265306 0.335165 0.194815 0.270228 0.166536 0.000785 0.282575 0.490581 0.739403 1.000000 0.003925 0.160911 0.421507 0.682889 0.997645 0.001570 0.298273 0.555730 0.775510 0.998430 0.282575 0.491366 0.226060 0.285153 0.124902 0.229379 0.003925 0.176609 0.445840 0.718995 0.996075 0.001570 0.279435 0.514914 0.756672 1.000000 0.000785 0.290424 0.511774 0.759027 0.998430 0.032182 0.062009 0.062794 0.054160 0.041601 0.058870 0.035322 0.039246 0.101256 0.052590 0.036892 0.023548 0.039246 0.020408 0.064364 0.126374 0.080063 0.011774 0.046311 0.010989 
>YAL003w
0.383495 0.354369 0.262136 0.243902 0.243902 0.195122 0.024272 0.296117 0.495146 0.805825 0.995146 0.009709 0.208738 0.412621 0.601942 0.980583 0.004854 0.233010 0.616505 0.791262 1.000000 0.427184 0.213592 0.359223 0.048780 0.078049 0.000000 0.004854 0.218447 0.402913 0.655340 1.000000 0.116505 0.616505 0.776699 0.839806 0.995146 0.043689 0.184466 0.432039 0.529126 0.912621 0.451456 0.360976 0.014563 0.223301 0.601942 0.791262 0.985437 0.436893 0.354369 0.208738 0.307317 0.200000 0.165854 0.009709 0.223301 0.427184 0.650485 0.980583 0.043689 0.296117 0.616505 0.820388 1.000000 0.004854 0.218447 0.480583 0.699029 0.995146 0.276699 0.325243 0.398058 0.200000 0.258537 0.229268 0.004854 0.218447 0.597087 0.781553 1.000000 0.009709 0.194175 0.412621 0.601942 0.980583 0.024272 0.296117 0.519417 0.805825 0.995146 0.402913 0.388350 0.208738 0.297561 0.170732 0.195122 0.009709 0.208738 0.417476 0.650485 0.980583 0.043689 0.320388 0.616505 0.820388 1.000000 0.004854 0.218447 0.480583 0.699029 0.995146 0.009709 0.087379 0.106796 0.106796 0.043689 0.029126 0.029126 0.155340 0.072816 0.038835 0.029126 0.014563 0.014563 0.004854 0.058252 0.058252 0.058252 0.019417 0.048544 0.014563 
>YAL005c
0.364486 0.369159 0.266355 0.237129 0.210608 0.184087 0.004673 0.246106 0.501558 0.774143 1.000000 0.003115 0.249221 0.531153 0.767913 0.992212 0.001558 0.224299 0.465732 0.680685 0.998442 0.342679 0.271028 0.386293 0.092044 0.060842 0.007800 0.001558 0.213396 0.560748 0.750779 1.000000 0.007788 0.171340 0.431464 0.661994 0.996885 0.079439 0.356698 0.500000 0.831776 0.945483 0.512461 0.383775 0.006231 0.241433 0.465732 0.683801 0.998442 0.426791 0.366044 0.207165 0.315133 0.170047 0.152886 0.003115 0.247664 0.523364 0.767913 1.000000 0.007788 0.261682 0.515576 0.742991 0.998442 0.001558 0.205607 0.417445 0.694704 0.970405 0.281931 0.345794 0.372274 0.188768 0.221529 0.232449 0.001558 0.228972 0.465732 0.679128 0.998442 0.003115 0.250779 0.554517 0.777259 0.992212 0.004673 0.244548 0.492212 0.772586 1.000000 0.380062 0.412773 0.207165 0.319813 0.159126 0.163807 0.003115 0.249221 0.507788 0.767913 1.000000 0.007788 0.261682 0.520249 0.742991 0.998442 0.001558 0.205607 0.417445 0.694704 0.970405 0.040498 0.082555 0.079439 0.076324 0.035826 0.049844 0.077882 0.093458 0.062305 0.070093 0.042056 0.007788 0.015576 0.004673 0.063863 0.074766 0.062305 0.012461 0.046729 0.001558 
>YAL007c
0.297674 0.339535 0.362791 0.177570 0.177570 0.261682 0.013953 0.395349 0.600000 0.720930 0.990698 0.018605 0.172093 0.381395 0.618605 0.995349 0.004651 0.200000 0.488372 0.841860 1.000000 0.269767 0.265116 0.465116 0.084112 0.046729 0.000000 0.004651 0.227907 0.367442 0.525581 1.000000 0.148837 0.255814 0.372093 0.474419 0.586047 0.013953 0.613953 0.734884 0.860465 0.976744 0.548837 0.364486 0.027907 0.167442 0.488372 0.772093 0.962791 0.358140 0.427907 0.213953 0.303738 0.163551 0.196262 0.018605 0.186047 0.367442 0.623256 0.972093 0.009302 0.283721 0.604651 0.813953 1.000000 0.004651 0.274419 0.483721 0.753488 0.995349 0.404651 0.293023 0.302326 0.275701 0.210280 0.135514 0.004651 0.204651 0.474419 0.809302 1.000000 0.018605 0.153488 0.367442 0.660465 0.972093 0.013953 0.395349 0.600000 0.716279 0.990698 0.330233 0.455814 0.213953 0.303738 0.154206 0.205607 0.018605 0.218605 0.386047 0.646512 0.972093 0.009302 0.255814 0.567442 0.790698 1.000000 0.004651 0.274419 0.483721 0.753488 0.995349 0.027907 0.065116 0.060465 0.055814 0.023256 0.065116 0.037209 0.074419 0.088372 0.074419 0.018605 0.004651 0.041860 0.009302 0.074419 0.102326 0.102326 0.013953 0.051163 0.009302 
>YAL008w
0.277778 0.303030 0.419192 0.126904 0.223350 0.299492 0.030303 0.171717 0.444444 0.757576 1.000000 0.010101 0.267677 0.449495 0.661616 0.989899 0.005051 0.232323 0.580808 0.777778 0.979798 0.368687 0.111111 0.520202 0.040609 0.131980 0.020305 0.005051 0.212121 0.358586 0.727273 1.000000 0.257576 0.338384 0.752525 0.803030 0.934343 0.015152 0.252525 0.560606 0.691919 0.979798 0.676768 0.324873 0.015152 0.247475 0.560606 0.742424 0.979798 0.303030 0.414141 0.282828 0.309645 0.106599 0.258883 0.010101 0.267677 0.449495 0.676768 0.989899 0.015152 0.257576 0.530303 0.762626 0.994949 0.005051 0.151515 0.520202 0.737374 1.000000 0.439394 0.277778 0.282828 0.274112 0.238579 0.111675 0.005051 0.257576 0.585859 0.777778 0.979798 0.010101 0.247475 0.429293 0.626263 0.989899 0.030303 0.176768 0.474747 0.757576 1.000000 0.272727 0.444444 0.282828 0.284264 0.101523 0.263959 0.010101 0.267677 0.459596 0.676768 0.989899 0.015152 0.257576 0.494949 0.757576 0.994949 0.005051 0.151515 0.520202 0.737374 1.000000 0.050505 0.085859 0.025253 0.020202 0.025253 0.070707 0.095960 0.050505 0.060606 0.045455 0.025253 0.005051 0.020202 0.005051 0.090909 0.141414 0.060606 0.040404 0.065657 0.015152 
>YAL009w
0.335907 0.332046 0.332046 0.217054 0.213178 0.224806 0.007722 0.231660 0.571429 0.806950 1.000000 0.011583 0.162162 0.428571 0.679537 0.996139 0.003861 0.301158 0.478764 0.718147 0.980695 0.424710 0.324324 0.250965 0.093023 0.038760 0.007752 0.003861 0.104247 0.386100 0.741313 1.000000 0.335907 0.444015 0.544402 0.706564 0.907336 0.181467 0.239382 0.301158 0.911197 0.976834 0.567568 0.333333 0.023166 0.312741 0.482625 0.698842 0.980695 0.335907 0.355212 0.308880 0.244186 0.182171 0.232558 0.011583 0.135135 0.428571 0.702703 0.996139 0.007722 0.258687 0.490347 0.752896 1.000000 0.003861 0.316602 0.536680 0.764479 0.992278 0.362934 0.281853 0.355212 0.189922 0.248062 0.189922 0.003861 0.316602 0.494208 0.706564 0.980695 0.011583 0.135135 0.393822 0.671815 0.996139 0.007722 0.239382 0.567568 0.806950 1.000000 0.301158 0.389961 0.308880 0.228682 0.151163 0.263566 0.019305 0.135135 0.393822 0.671815 0.996139 0.007722 0.247104 0.509653 0.752896 1.000000 0.003861 0.316602 0.536680 0.764479 0.992278 0.092664 0.065637 0.050193 0.046332 0.042471 0.038610 0.042471 0.061776 0.096525 0.054054 0.027027 0.019305 0.030888 0.007722 0.069498 0.073359 0.081081 0.011583 0.065637 0.023166 
>YAL010c
0.314402 0.391481 0.294118 0.209350 0.205285 0.235772 0.012170 0.243408 0.533469 0.770791 0.993915 0.006085 0.231237 0.492901 0.705882 1.000000 0.002028 0.277890 0.488844 0.752535 0.991886 0.513185 0.184584 0.302231 0.071138 0.071138 0.006098 0.002028 0.235294 0.486815 0.697769 1.000000 0.087221 0.381339 0.482759 0.614604 0.995943 0.006085 0.196755 0.620690 0.780933 0.876268 0.584178 0.382114 0.008114 0.290061 0.484787 0.703854 0.995943 0.397566 0.354970 0.247465 0.302846 0.166667 0.176829 0.006085 0.239351 0.503043 0.744422 1.000000 0.004057 0.245436 0.511156 0.752535 0.993915 0.002028 0.267748 0.448276 0.713996 0.995943 0.334686 0.328600 0.336714 0.227642 0.241870 0.189024 0.002028 0.275862 0.480730 0.734280 0.995943 0.006085 0.231237 0.501014 0.742394 1.000000 0.012170 0.245436 0.533469 0.760649 0.993915 0.350913 0.401623 0.247465 0.290650 0.154472 0.189024 0.012170 0.235294 0.501014 0.750507 1.000000 0.004057 0.251521 0.511156 0.740365 0.993915 0.002028 0.267748 0.448276 0.713996 0.995943 0.040568 0.058824 0.042596 0.058824 0.038540 0.075051 0.034483 0.034483 0.133874 0.089249 0.036511 0.022312 0.040568 0.010142 0.030426 0.119675 0.048682 0.012170 0.056795 0.016227 
>YAL011w
0.470400 0.296000 0.233600 0.243590 0.222756 0.131410 0.009600 0.296000 0.488000 0.700800 1.000000 0.003200 0.177600 0.512000 0.740800 0.996800 0.001600 0.267200 0.504000 0.784000 0.988800 0.323200 0.065600 0.611200 0.036859 0.072115 0.001603 0.001600 0.108800 0.230400 0.755200 1.000000 0.004800 0.161600 0.257600 0.780800 0.950400 0.076800 0.376000 0.542400 0.720000 0.995200 0.235200 0.282051 0.006400 0.195200 0.723200 0.886400 0.988800 0.328000 0.372800 0.299200 0.213141 0.174679 0.229167 0.003200 0.166400 0.478400 0.700800 0.992000 0.006400 0.302400 0.513600 0.760000 0.984000 0.001600 0.275200 0.494400 0.753600 1.000000 0.256000 0.259200 0.484800 0.121795 0.248397 0.221154 0.001600 0.254400 0.513600 0.793600 0.988800 0.003200 0.177600 0.486400 0.707200 0.992000 0.009600 0.296000 0.491200 0.713600 1.000000 0.276800 0.424000 0.299200 0.224359 0.144231 0.259615 0.004800 0.158400 0.478400 0.700800 0.992000 0.003200 0.289600 0.513600 0.758400 0.984000 0.001600 0.275200 0.494400 0.753600 1.000000 0.064000 0.136000 0.110400 0.064000 0.051200 0.044800 0.028800 0.059200 0.075200 0.049600 0.046400 0.014400 0.022400 0.004800 0.048000 0.073600 0.044800 0.030400 0.022400 0.009600 
>YAL012w
0.289340 0.423858 0.286802 0.221374 0.173028 0.241730 0.010152 0.276650 0.517766 0.756345 1.000000 0.005076 0.208122 0.469543 0.733503 0.997462 0.002538 0.324873 0.522843 0.751269 0.987310 0.454315 0.187817 0.357868 0.083969 0.078880 0.002545 0.002538 0.225888 0.512690 0.802030 1.000000 0.027919 0.185279 0.365482 0.604061 0.944162 0.142132 0.296954 0.576142 0.685279 0.994924 0.664975 0.310433 0.022843 0.251269 0.494924 0.718274 0.994924 0.416244 0.385787 0.197970 0.335878 0.157761 0.175573 0.005076 0.218274 0.482234 0.774112 0.997462 0.007614 0.289340 0.500000 0.728426 1.000000 0.002538 0.274112 0.520305 0.736041 0.989848 0.312183 0.362944 0.324873 0.229008 0.211196 0.223919 0.002538 0.289340 0.505076 0.743655 0.987310 0.005076 0.208122 0.469543 0.769036 0.997462 0.010152 0.274112 0.507614 0.746193 1.000000 0.373096 0.428934 0.197970 0.315522 0.142494 0.190840 0.005076 0.215736 0.492386 0.779188 0.997462 0.007614 0.261421 0.484772 0.718274 1.000000 0.002538 0.274112 0.520305 0.736041 0.989848 0.032995 0.055838 0.053299 0.053299 0.038071 0.055838 0.071066 0.104061 0.073604 0.071066 0.043147 0.035533 0.025381 0.000000 0.076142 0.101523 0.060914 0.007614 0.035533 0.005076 
>YAL013w
0.440476 0.323810 0.235714 0.252983 0.229117 0.155131 0.007143 0.238095 0.419048 0.685714 0.971429 0.004762 0.240476 0.542857 0.776190 1.000000 0.002381 0.292857 0.566667 0.780952 0.995238 0.438095 0.057143 0.504762 0.023866 0.076372 0.004773 0.002381 0.154762 0.361905 0.785714 1.000000 0.102381 0.750000 0.819048 0.850000 0.995238 0.023810 0.297619 0.538095 0.664286 0.964286 0.361905 0.396181 0.057143 0.400000 0.614286 0.797619 0.995238 0.354762 0.414286 0.230952 0.300716 0.155131 0.162291 0.004762 0.221429 0.511905 0.773810 1.000000 0.007143 0.228571 0.442857 0.695238 0.964286 0.002381 0.314286 0.571429 0.747619 0.997619 0.276190 0.254762 0.469048 0.140811 0.286396 0.210024 0.002381 0.400000 0.588095 0.783333 0.997619 0.004762 0.200000 0.461905 0.771429 1.000000 0.007143 0.242857 0.426190 0.692857 0.983333 0.290476 0.478571 0.230952 0.284010 0.124105 0.193317 0.004762 0.200000 0.461905 0.761905 1.000000 0.007143 0.238095 0.464286 0.730952 0.995238 0.002381 0.314286 0.571429 0.747619 0.997619 0.050000 0.066667 0.130952 0.080952 0.054762 0.057143 0.023810 0.059524 0.066667 0.059524 0.045238 0.028571 0.040476 0.019048 0.033333 0.088095 0.050000 0.021429 0.019048 0.004762 
>YAL014c
0.419608 0.254902 0.325490 0.200787 0.224409 0.153543 0.007843 0.266667 0.458824 0.701961 0.929412 0.027451 0.247059 0.501961 0.686275 0.925490 0.003922 0.196078 0.600000 0.850980 1.000000 0.388235 0.035294 0.576471 0.011811 0.106299 0.003937 0.003922 0.349020 0.501961 0.737255 1.000000 0.392157 0.396078 0.403922 0.431373 0.443137 0.011765 0.188235 0.541176 0.756863 0.996078 0.329412 0.409449 0.011765 0.184314 0.396078 0.705882 0.945098 0.317647 0.513725 0.168627 0.338583 0.118110 0.114173 0.007843 0.239216 0.482353 0.690196 0.933333 0.011765 0.235294 0.564706 0.792157 1.000000 0.003922 0.243137 0.400000 0.678431 0.913725 0.345098 0.219608 0.435294 0.145669 0.255906 0.192913 0.003922 0.207843 0.537255 0.823529 1.000000 0.027451 0.239216 0.501961 0.690196 0.925490 0.007843 0.270588 0.466667 0.717647 0.929412 0.266667 0.564706 0.168627 0.318898 0.106299 0.125984 0.007843 0.239216 0.458824 0.713725 0.925490 0.011765 0.250980 0.556863 0.776471 1.000000 0.003922 0.243137 0.400000 0.678431 0.913725 0.047059 0.050980 0.066667 0.090196 0.086275 0.078431 0.027451 0.023529 0.086275 0.039216 0.043137 0.015686 0.019608 0.007843 0.070588 0.164706 0.047059 0.015686 0.019608 0.000000 
>YAL015c
0.350877 0.308271 0.340852 0.213568 0.266332 0.218593 0.005013 0.243108 0.543860 0.812030 1.000000 0.012531 0.225564 0.446115 0.674185 0.987469 0.002506 0.275689 0.498747 0.746867 0.994987 0.501253 0.077694 0.421053 0.050251 0.110553 0.005025 0.002506 0.170426 0.355890 0.799499 1.000000 0.010025 0.157895 0.651629 0.929825 0.979950 0.017544 0.388471 0.521303 0.681704 0.914787 0.483709 0.376884 0.010025 0.348371 0.546366 0.736842 0.989975 0.333333 0.423559 0.243108 0.288945 0.190955 0.173367 0.012531 0.248120 0.466165 0.701754 1.000000 0.005013 0.265664 0.498747 0.779449 0.997494 0.002506 0.235589 0.501253 0.734336 0.992481 0.368421 0.268170 0.363409 0.208543 0.301508 0.193467 0.002506 0.263158 0.496241 0.746867 0.994987 0.012531 0.220551 0.411028 0.674185 0.987469 0.005013 0.245614 0.526316 0.804511 1.000000 0.263158 0.493734 0.243108 0.271357 0.158291 0.206030 0.012531 0.288221 0.491228 0.706767 1.000000 0.005013 0.233083 0.493734 0.764411 0.997494 0.002506 0.235589 0.501253 0.734336 0.992481 0.042607 0.090226 0.075188 0.052632 0.055138 0.035088 0.047619 0.037594 0.065163 0.060150 0.057644 0.012531 0.027569 0.012531 0.082707 0.105263 0.070175 0.030075 0.015038 0.025063 
>YAL016c-b
0.295082 0.327869 0.377049 0.116667 0.133333 0.316667 0.131148 0.229508 0.442623 0.590164 1.000000 0.049180 0.327869 0.573770 0.770492 0.934426 0.016393 0.147541 0.377049 0.803279 0.983607 0.377049 0.245902 0.377049 0.100000 0.033333 0.033333 0.016393 0.573770 0.672131 0.901639 1.000000 0.049180 0.081967 0.524590 0.803279 0.868852 0.098361 0.163934 0.262295 0.360656 0.540984 0.606557 0.266667 0.032787 0.163934 0.377049 0.737705 0.918033 0.213115 0.459016 0.327869 0.183333 0.150000 0.233333 0.344262 0.573770 0.688525 0.770492 0.934426 0.032787 0.213115 0.442623 0.655738 1.000000 0.016393 0.098361 0.327869 0.606557 0.885246 0.491803 0.196721 0.311475 0.233333 0.216667 0.066667 0.016393 0.147541 0.360656 0.721311 0.983607 0.344262 0.573770 0.737705 0.836066 0.934426 0.098361 0.213115 0.426230 0.590164 1.000000 0.180328 0.491803 0.327869 0.166667 0.133333 0.250000 0.344262 0.524590 0.688525 0.770492 0.934426 0.032787 0.213115 0.475410 0.672131 1.000000 0.016393 0.098361 0.327869 0.606557 0.885246 0.032787 0.065574 0.081967 0.016393 0.016393 0.081967 0.016393 0.016393 0.081967 0.049180 0.032787 0.016393 0.114754 0.000000 0.032787 0.098361 0.147541 0.016393 0.081967 0.000000 
>YAL016w
0.333858 0.292913 0.373228 0.164038 0.247634 0.242902 0.007874 0.281890 0.503937 0.748031 1.000000 0.003150 0.166929 0.429921 0.699213 0.987402 0.001575 0.299213 0.562205 0.765354 0.996850 0.240945 0.000000 0.759055 0.000000 0.129338 0.000000 0.001575 0.077165 0.321260 0.644094 1.000000 0 0 0 0 0 0.047244 0.305512 0.543307 0.774803 0.996850 0.537008 0.454259 0.006299 0.278740 0.530709 0.752756 0.996850 0.362205 0.453543 0.184252 0.342271 0.127760 0.154574 0.003150 0.179528 0.440945 0.707087 0.990551 0.018898 0.286614 0.541732 0.752756 1.000000 0.001575 0.281890 0.489764 0.766929 0.998425 0.392126 0.267717 0.340157 0.235016 0.261830 0.152997 0.001575 0.299213 0.560630 0.766929 0.996850 0.003150 0.159055 0.426772 0.694488 0.987402 0.007874 0.269291 0.502362 0.748031 1.000000 0.318110 0.497638 0.184252 0.309148 0.113565 0.168770 0.003150 0.177953 0.434646 0.699213 0.987402 0.018898 0.278740 0.541732 0.757480 1.000000 0.001575 0.281890 0.489764 0.766929 0.998425 0.036220 0.055118 0.061417 0.083465 0.042520 0.055118 0.026772 0.083465 0.078740 0.045669 0.033071 0.006299 0.018898 0.011024 0.077165 0.143307 0.074016 0.014173 0.042520 0.011024 
>YAL017w
0.347345 0.355457 0.297198 0.219926 0.206642 0.187454 0.005900 0.255900 0.502950 0.765487 0.997050 0.001475 0.189528 0.451327 0.699853 0.991150 0.000737 0.305310 0.544248 0.799410 1.000000 0.534661 0.137168 0.328171 0.056827 0.077491 0.009594 0.000737 0.197640 0.471976 0.741888 1.000000 0.002212 0.418142 0.634218 0.810472 0.999263 0.032448 0.262537 0.456490 0.738201 0.994838 0.463864 0.376384 0.002950 0.328909 0.552360 0.811947 0.998525 0.385693 0.382006 0.232301 0.283395 0.159410 0.189668 0.001475 0.207965 0.455015 0.710914 0.996313 0.002950 0.258112 0.520649 0.770649 1.000000 0.000737 0.278024 0.547935 0.779499 0.997788 0.320796 0.306047 0.373156 0.182288 0.239852 0.201476 0.000737 0.305310 0.547198 0.806047 1.000000 0.001475 0.180678 0.441740 0.689528 0.991150 0.005900 0.252950 0.505900 0.758112 0.997050 0.323009 0.444690 0.232301 0.274539 0.135793 0.213284 0.003687 0.226401 0.471239 0.713864 0.996313 0.001475 0.245575 0.500000 0.766224 1.000000 0.000737 0.278024 0.547935 0.779499 0.997788 0.038348 0.075221 0.070796 0.070796 0.029499 0.062684 0.044248 0.044248 0.108407 0.055310 0.053835 0.025811 0.023599 0.008850 0.048673 0.104720 0.065634 0.018437 0.044985 0.005900 
>YAL018c
0.215385 0.369231 0.415385 0.132716 0.160494 0.336420 0.055385 0.196923 0.535385 0.784615 1.000000 0.006154 0.215385 0.421538 0.729231 0.993846 0.003077 0.295385 0.489231 0.698462 0.981538 0.289231 0.126154 0.584615 0.046296 0.058642 0.003086 0.003077 0.098462 0.532308 0.756923 1.000000 0.046154 0.240000 0.504615 0.732308 0.966154 0.018462 0.295385 0.446154 0.769231 0.981538 0.686154 0.271605 0.009231 0.270769 0.492308 0.729231 0.966154 0.304615 0.406154 0.289231 0.250000 0.182099 0.197531 0.006154 0.212308 0.421538 0.803077 0.993846 0.021538 0.375385 0.569231 0.787692 1.000000 0.003077 0.187692 0.415385 0.615385 0.923077 0.476923 0.286154 0.236923 0.290123 0.206790 0.111111 0.003077 0.283077 0.486154 0.689231 0.981538 0.006154 0.215385 0.409231 0.800000 0.993846 0.055385 0.233846 0.526154 0.784615 1.000000 0.252308 0.458462 0.289231 0.219136 0.145062 0.234568 0.006154 0.206154 0.387692 0.800000 0.978462 0.021538 0.375385 0.569231 0.787692 1.000000 0.003077 0.187692 0.415385 0.615385 0.923077 0.018462 0.046154 0.040000 0.015385 0.036923 0.058462 0.064615 0.058462 0.067692 0.046154 0.049231 0.021538 0.061538 0.003077 0.064615 0.123077 0.083077 0.030769 0.104615 0.006154 
>YAL019w
0.414677 0.323607 0.261715 0.240708 0.204425 0.150442 0.006189 0.271441 0.468612 0.741821 1.000000 0.001768 0.191866 0.412909 0.698497 0.998232 0.000884 0.312997 0.595933 0.806366 0.989390 0.499558 0.092838 0.407604 0.042478 0.097345 0.003540 0.000884 0.179487 0.358974 0.663130 1.000000 0.010610 0.229001 0.597701 0.877984 0.950486 0.062776 0.397878 0.601238 0.777188 0.990274 0.407604 0.334513 0.010610 0.377542 0.616269 0.816976 0.989390 0.374005 0.384615 0.241379 0.258407 0.173451 0.190265 0.001768 0.215738 0.420866 0.696729 0.998232 0.006189 0.272325 0.531388 0.766578 1.000000 0.000884 0.278515 0.576481 0.764810 0.999116 0.290009 0.275862 0.434129 0.146903 0.243363 0.210619 0.000884 0.315650 0.587975 0.798408 0.990274 0.001768 0.166225 0.398762 0.679929 0.998232 0.004421 0.269673 0.471264 0.743590 1.000000 0.323607 0.435013 0.241379 0.253982 0.149558 0.214159 0.001768 0.230769 0.425287 0.696729 0.998232 0.006189 0.254642 0.519894 0.751547 1.000000 0.000884 0.278515 0.576481 0.764810 0.999116 0.044209 0.090186 0.075155 0.091954 0.040672 0.072502 0.033599 0.058355 0.083996 0.055703 0.044209 0.019452 0.028294 0.006189 0.048630 0.091070 0.056587 0.019452 0.034483 0.005305 
>YAL020c
0.297297 0.384384 0.318318 0.240964 0.162651 0.253012 0.030030 0.207207 0.444444 0.666667 0.963964 0.006006 0.258258 0.531532 0.804805 0.987988 0.003003 0.270270 0.519520 0.717718 1.000000 0.573574 0.417417 0.009009 0.150602 0.006024 0.000000 0.003003 0.225225 0.483483 0.750751 1.000000 0.009009 0.279279 0.546547 0.735736 0.996997 0.090090 0.090090 0.090090 0.093093 0.096096 0.651652 0.222892 0.006006 0.279279 0.486486 0.729730 0.996997 0.417417 0.360360 0.222222 0.265060 0.222892 0.177711 0.006006 0.207207 0.462462 0.765766 0.987988 0.012012 0.267267 0.504505 0.726727 1.000000 0.003003 0.288288 0.552553 0.735736 0.990991 0.345345 0.324324 0.330330 0.219880 0.195783 0.225904 0.003003 0.276276 0.519520 0.726727 1.000000 0.006006 0.246246 0.513514 0.801802 0.987988 0.030030 0.216216 0.471471 0.708709 0.963964 0.339339 0.438438 0.222222 0.265060 0.180723 0.219880 0.006006 0.198198 0.459459 0.744745 0.987988 0.009009 0.258258 0.489489 0.756757 1.000000 0.003003 0.288288 0.552553 0.735736 0.990991 0.057057 0.030030 0.042042 0.057057 0.066066 0.045045 0.126126 0.051051 0.054054 0.051051 0.042042 0.033033 0.027027 0.036036 0.111111 0.066066 0.030030 0.018018 0.030030 0.027027 
>YAL021c
0.354839 0.357228 0.287933 0.235646 0.204545 0.214115 0.002389 0.230585 0.465950 0.725209 0.998805 0.004779 0.237754 0.469534 0.734767 0.996416 0.001195 0.334528 0.538829 0.787336 1.000000 0.573477 0.114695 0.311828 0.046651 0.075359 0.005981 0.001195 0.260454 0.482676 0.751493 1.000000 0.131422 0.513740 0.721625 0.794504 0.998805 0.016726 0.213859 0.394265 0.667861 0.979689 0.463560 0.411483 0.007168 0.223417 0.580645 0.792115 0.988053 0.365591 0.394265 0.240143 0.285885 0.163876 0.177033 0.003584 0.253286 0.461171 0.731183 0.996416 0.002389 0.186380 0.444444 0.681004 1.000000 0.001195 0.401434 0.632019 0.794504 0.998805 0.318996 0.295102 0.385902 0.186603 0.253589 0.210526 0.001195 0.346476 0.545998 0.787336 1.000000 0.004779 0.224612 0.419355 0.704898 0.996416 0.002389 0.230585 0.482676 0.737157 0.998805 0.299881 0.459976 0.240143 0.275120 0.143541 0.197368 0.003584 0.259259 0.461171 0.737157 0.996416 0.002389 0.189964 0.444444 0.679809 1.000000 0.001195 0.401434 0.632019 0.794504 0.998805 0.029869 0.062127 0.041816 0.059737 0.072879 0.088411 0.052569 0.060932 0.065711 0.060932 0.054958 0.031063 0.031063 0.010753 0.040621 0.109916 0.040621 0.026284 0.047790 0.011947 
>YAL022c
0.251451 0.346228 0.402321 0.164729 0.135659 0.292636 0.011605 0.145068 0.535783 0.661509 1.000000 0.003868 0.212766 0.464217 0.740812 0.978723 0.001934 0.311412 0.502901 0.764023 0.998066 0.373308 0.052224 0.574468 0.015504 0.077519 0.015504 0.001934 0.123791 0.547389 0.711799 1.000000 0.027079 0.061896 0.156673 0.736944 0.912959 0.075435 0.311412 0.489362 0.771760 0.998066 0.684720 0.162791 0.019342 0.288201 0.487427 0.785300 0.996132 0.355899 0.394584 0.249516 0.302326 0.158915 0.201550 0.003868 0.212766 0.485493 0.758221 0.992263 0.019342 0.288201 0.526112 0.735010 0.998066 0.001934 0.255319 0.479691 0.756286 1.000000 0.431335 0.299807 0.268859 0.273256 0.158915 0.141473 0.001934 0.303675 0.500967 0.762089 0.998066 0.003868 0.214700 0.464217 0.740812 0.976789 0.011605 0.143133 0.531915 0.661509 1.000000 0.317215 0.433269 0.249516 0.259690 0.135659 0.224806 0.003868 0.220503 0.485493 0.758221 0.992263 0.019342 0.284333 0.518375 0.735010 0.998066 0.001934 0.255319 0.479691 0.756286 1.000000 0.034816 0.038685 0.061896 0.048356 0.023211 0.044487 0.056093 0.050290 0.092843 0.069632 0.030948 0.017408 0.029014 0.007737 0.081238 0.098646 0.085106 0.036750 0.077369 0.015474 
>YAL023c
0.252964 0.380764 0.366271 0.158311 0.158311 0.296834 0.014493 0.260870 0.537549 0.702240 0.998682 0.002635 0.216074 0.478261 0.750988 1.000000 0.001318 0.271410 0.459816 0.783926 0.992095 0.421607 0.117260 0.461133 0.043536 0.040897 0.001319 0.001318 0.183136 0.527009 0.699605 1.000000 0.077734 0.498024 0.587615 0.644269 0.795784 0.055336 0.241107 0.372859 0.855072 0.996047 0.677207 0.213720 0.007905 0.267457 0.495389 0.779974 0.993412 0.370224 0.334651 0.295125 0.234828 0.225594 0.200528 0.002635 0.229249 0.486166 0.749671 1.000000 0.015810 0.251647 0.495389 0.728590 0.998682 0.001318 0.260870 0.515152 0.778656 0.996047 0.411067 0.308300 0.280632 0.267810 0.200528 0.147757 0.001318 0.264822 0.474308 0.795784 0.992095 0.002635 0.222661 0.471673 0.748353 1.000000 0.014493 0.251647 0.532279 0.699605 0.998682 0.309618 0.395257 0.295125 0.237467 0.183377 0.242744 0.002635 0.218709 0.461133 0.740448 1.000000 0.015810 0.264822 0.516469 0.741765 0.998682 0.001318 0.260870 0.515152 0.778656 0.996047 0.043478 0.044796 0.039526 0.047431 0.028986 0.048748 0.065876 0.059289 0.088274 0.048748 0.046113 0.027668 0.044796 0.014493 0.061924 0.104084 0.051383 0.031621 0.067194 0.035573 
>YAL024c
0.373519 0.341463 0.285017 0.238494 0.221757 0.191771 0.001394 0.280836 0.504530 0.740767 0.997909 0.003484 0.242509 0.469686 0.699652 1.000000 0.000697 0.216028 0.540070 0.822300 0.998606 0.530314 0.094774 0.374913 0.045328 0.080195 0.006276 0.000697 0.273171 0.503136 0.702439 1.000000 0.002091 0.174913 0.490592 0.584669 0.963066 0.036237 0.208362 0.425087 0.868990 0.998606 0.413937 0.387727 0.002091 0.204181 0.486411 0.792334 0.998606 0.363763 0.407666 0.228571 0.293584 0.145049 0.191771 0.003484 0.250174 0.485714 0.710105 1.000000 0.001394 0.268293 0.544948 0.783275 0.998606 0.000697 0.208362 0.445993 0.748432 0.990244 0.311498 0.294077 0.394425 0.177824 0.260809 0.205021 0.000697 0.207666 0.517073 0.817422 0.998606 0.003484 0.252962 0.485714 0.708711 1.000000 0.001394 0.272474 0.498258 0.734495 0.997909 0.315679 0.455749 0.228571 0.301255 0.127615 0.209205 0.003484 0.259233 0.494077 0.710105 1.000000 0.001394 0.256446 0.536585 0.774913 0.998606 0.000697 0.208362 0.445993 0.748432 0.990244 0.046690 0.073868 0.068990 0.063415 0.039024 0.081533 0.019512 0.038328 0.133101 0.061324 0.041812 0.020906 0.026481 0.006272 0.052962 0.094774 0.070383 0.018815 0.033449 0.008362 
>YAL025c
0.480392 0.294118 0.225490 0.288525 0.213115 0.131148 0.009804 0.310458 0.578431 0.784314 1.000000 0.006536 0.215686 0.454248 0.800654 0.996732 0.003268 0.173203 0.366013 0.588235 0.993464 0.464052 0.117647 0.418301 0.039344 0.072131 0.006557 0.003268 0.186275 0.650327 0.823529 1.000000 0.019608 0.088235 0.192810 0.715686 0.954248 0.016340 0.336601 0.473856 0.617647 0.993464 0.343137 0.380328 0.016340 0.173203 0.326797 0.532680 0.980392 0.330065 0.388889 0.281046 0.226230 0.160656 0.236066 0.006536 0.218954 0.568627 0.790850 0.996732 0.013072 0.267974 0.519608 0.741830 1.000000 0.003268 0.245098 0.405229 0.611111 0.964052 0.258170 0.238562 0.503268 0.111475 0.252459 0.249180 0.003268 0.173203 0.366013 0.594771 0.993464 0.006536 0.218954 0.509804 0.807190 0.996732 0.009804 0.310458 0.552288 0.771242 1.000000 0.287582 0.431373 0.281046 0.239344 0.127869 0.268852 0.006536 0.284314 0.650327 0.807190 0.996732 0.013072 0.222222 0.486928 0.718954 1.000000 0.003268 0.245098 0.405229 0.611111 0.964052 0.065359 0.104575 0.143791 0.071895 0.049020 0.045752 0.035948 0.068627 0.075163 0.035948 0.022876 0.022876 0.032680 0.019608 0.058824 0.058824 0.032680 0.019608 0.016340 0.019608 
>YAL026c
0.323247 0.346125 0.330627 0.222304 0.191285 0.220827 0.001476 0.210332 0.473063 0.692989 0.999262 0.005166 0.245756 0.489299 0.756458 0.997786 0.000738 0.300369 0.530627 0.770480 1.000000 0.450185 0.166052 0.383764 0.063516 0.060561 0.004431 0.000738 0.134317 0.402952 0.680443 1.000000 0.014022 0.255351 0.428782 0.597048 0.994096 0.053137 0.381550 0.651661 0.811808 0.977122 0.593358 0.289513 0.013284 0.305535 0.549815 0.772694 0.998524 0.358672 0.388192 0.253137 0.282866 0.161743 0.197932 0.002214 0.233948 0.474539 0.717343 0.999262 0.001476 0.260517 0.507011 0.729889 1.000000 0.000738 0.256827 0.523985 0.797048 0.998524 0.369742 0.287085 0.343173 0.201625 0.235598 0.197194 0.000738 0.300369 0.531365 0.775646 1.000000 0.005166 0.247970 0.484871 0.740959 0.997786 0.001476 0.206642 0.471587 0.695941 0.999262 0.316605 0.430258 0.253137 0.264402 0.141802 0.217873 0.002214 0.239114 0.480443 0.720295 0.999262 0.001476 0.252399 0.501107 0.726937 1.000000 0.000738 0.256827 0.523985 0.797048 0.998524 0.043542 0.058303 0.065683 0.061993 0.034686 0.059041 0.056827 0.063469 0.073063 0.061255 0.032472 0.019926 0.039114 0.009594 0.054613 0.093727 0.080443 0.020664 0.058303 0.013284 
>YAL027w
0.356322 0.306513 0.337165 0.253846 0.242308 0.192308 0.034483 0.260536 0.532567 0.785441 1.000000 0.007663 0.233716 0.490421 0.708812 0.988506 0.003831 0.241379 0.452107 0.720307 0.961686 0.432950 0.160920 0.406130 0.076923 0.092308 0.007692 0.003831 0.218391 0.475096 0.812261 1.000000 0.072797 0.203065 0.429119 0.885057 0.965517 0.019157 0.306513 0.509579 0.616858 0.904215 0.521073 0.400000 0.019157 0.245211 0.498084 0.693487 0.961686 0.314176 0.440613 0.245211 0.307692 0.115385 0.196154 0.007663 0.210728 0.459770 0.708812 0.988506 0.019157 0.249042 0.486590 0.770115 1.000000 0.003831 0.272031 0.555556 0.731801 0.980843 0.360153 0.252874 0.386973 0.153846 0.288462 0.223077 0.003831 0.245211 0.486590 0.693487 0.961686 0.007663 0.187739 0.459770 0.704981 0.988506 0.034483 0.268199 0.547893 0.789272 1.000000 0.252874 0.501916 0.245211 0.269231 0.092308 0.219231 0.007663 0.199234 0.459770 0.681992 0.977011 0.011494 0.241379 0.486590 0.773946 1.000000 0.003831 0.272031 0.555556 0.731801 0.980843 0.045977 0.091954 0.053640 0.053640 0.045977 0.065134 0.022989 0.057471 0.065134 0.053640 0.053640 0.030651 0.022989 0.007663 0.061303 0.114943 0.099617 0.015326 0.034483 0.003831 
>YAL028w
0.335227 0.414773 0.250000 0.248577 0.185958 0.184061 0.003788 0.231061 0.518939 0.787879 1.000000 0.007576 0.234848 0.458333 0.615530 0.998106 0.001894 0.278409 0.623106 0.839015 0.994318 0.573864 0.054924 0.371212 0.032258 0.043643 0.001898 0.001894 0.214015 0.380682 0.547348 1.000000 0.009470 0.164773 0.255682 0.492424 0.655303 0.058712 0.687500 0.795455 0.899621 0.994318 0.376894 0.440228 0.011364 0.259470 0.500000 0.759470 0.994318 0.420455 0.316288 0.263258 0.254269 0.208729 0.140417 0.007576 0.236742 0.473485 0.632576 0.996212 0.003788 0.280303 0.642045 0.806818 0.994318 0.001894 0.219697 0.388258 0.778409 1.000000 0.272727 0.346591 0.380682 0.178368 0.222011 0.220114 0.001894 0.287879 0.623106 0.831439 0.994318 0.007576 0.236742 0.465909 0.613636 0.996212 0.003788 0.215909 0.473485 0.768939 1.000000 0.356061 0.380682 0.263258 0.277040 0.174573 0.174573 0.007576 0.232955 0.479167 0.653409 0.996212 0.003788 0.278409 0.562500 0.789773 0.994318 0.001894 0.219697 0.388258 0.778409 1.000000 0.039773 0.092803 0.053030 0.066288 0.039773 0.043561 0.034091 0.058712 0.160985 0.035985 0.056818 0.045455 0.022727 0.007576 0.053030 0.087121 0.039773 0.024621 0.034091 0.003788 
>YAL029c
0.363698 0.303875 0.332427 0.223129 0.245578 0.197279 0.002719 0.261047 0.507138 0.737593 1.000000 0.001360 0.200544 0.457512 0.726037 0.994562 0.000680 0.284160 0.524813 0.779062 0.997961 0.337865 0.081577 0.580557 0.037415 0.071429 0.004762 0.000680 0.178110 0.414004 0.783821 1.000000 0.005438 0.068661 0.200544 0.338545 0.855880 0.049626 0.346703 0.594833 0.755269 0.997281 0.526173 0.371429 0.002039 0.228416 0.477226 0.753229 0.997961 0.303875 0.433719 0.262407 0.266667 0.160544 0.220408 0.001360 0.218219 0.473827 0.736234 0.998640 0.002719 0.260367 0.518015 0.760027 0.997961 0.000680 0.261047 0.517335 0.731475 1.000000 0.371856 0.246771 0.381373 0.182993 0.293878 0.191156 0.000680 0.274643 0.522094 0.772944 0.997961 0.001360 0.208022 0.471108 0.733515 0.994562 0.002719 0.248131 0.496941 0.731475 1.000000 0.263766 0.473827 0.262407 0.252381 0.138095 0.242857 0.001360 0.220258 0.479946 0.736234 0.998640 0.002719 0.256288 0.502379 0.756628 0.997961 0.000680 0.261047 0.517335 0.731475 1.000000 0.044188 0.081577 0.078178 0.046907 0.046227 0.066621 0.042828 0.053025 0.070700 0.050306 0.029912 0.017675 0.039429 0.010197 0.053025 0.108090 0.081577 0.022434 0.046907 0.010197 
>YAL030w
0.358974 0.307692 0.333333 0.232759 0.189655 0.215517 0.068376 0.222222 0.418803 0.615385 1.000000 0.017094 0.111111 0.350427 0.623932 0.991453 0.008547 0.367521 0.735043 0.871795 0.982906 0.239316 0.000000 0.760684 0.000000 0.051724 0.000000 0.008547 0.059829 0.179487 0.769231 1.000000 0 0 0 0 0 0.102564 0.350427 0.538462 0.726496 0.957265 0.307692 0.396552 0.059829 0.341880 0.547009 0.769231 0.982906 0.350427 0.393162 0.256410 0.301724 0.198276 0.112069 0.017094 0.136752 0.350427 0.598291 0.991453 0.102564 0.282051 0.512821 0.846154 0.965812 0.008547 0.239316 0.641026 0.743590 1.000000 0.350427 0.273504 0.376068 0.206897 0.215517 0.206897 0.008547 0.367521 0.735043 0.863248 0.982906 0.017094 0.111111 0.350427 0.606838 0.991453 0.068376 0.222222 0.418803 0.641026 1.000000 0.307692 0.435897 0.256410 0.284483 0.163793 0.146552 0.017094 0.213675 0.384615 0.598291 0.991453 0.051282 0.264957 0.487179 0.846154 0.965812 0.008547 0.239316 0.641026 0.743590 1.000000 0.076923 0.068376 0.068376 0.068376 0.034188 0.042735 0.034188 0.094017 0.076923 0.034188 0.034188 0.017094 0.017094 0.008547 0.085470 0.076923 0.085470 0.042735 0.025641 0.008547 
>YAL031c
0.334211 0.363158 0.302632 0.221344 0.220026 0.205534 0.003947 0.232895 0.505263 0.723684 1.000000 0.015789 0.326316 0.617105 0.800000 0.996053 0.001316 0.197368 0.390789 0.630263 0.998684 0.489474 0.071053 0.439474 0.040843 0.069829 0.009223 0.001316 0.418421 0.665789 0.814474 1.000000 0.093421 0.414474 0.805263 0.886842 0.978947 0.005263 0.184211 0.321053 0.501316 0.997368 0.407895 0.374177 0.005263 0.198684 0.382895 0.556579 0.993421 0.357895 0.384211 0.257895 0.266140 0.168643 0.197628 0.003947 0.310526 0.610526 0.796053 0.996053 0.002632 0.209211 0.431579 0.706579 0.998684 0.001316 0.239474 0.482895 0.714474 1.000000 0.332895 0.309211 0.357895 0.184453 0.270092 0.194993 0.001316 0.194737 0.386842 0.601316 0.998684 0.015789 0.344737 0.636842 0.807895 0.996053 0.003947 0.239474 0.500000 0.727632 1.000000 0.282895 0.459211 0.257895 0.256917 0.138340 0.227931 0.003947 0.314474 0.617105 0.798684 0.996053 0.002632 0.213158 0.444737 0.715789 0.998684 0.001316 0.239474 0.482895 0.714474 1.000000 0.055263 0.086842 0.053947 0.035526 0.036842 0.065789 0.019737 0.050000 0.122368 0.055263 0.061842 0.023684 0.030263 0.013158 0.046053 0.114474 0.067105 0.017105 0.031579 0.013158 
>YAL032c
0.408971 0.361478 0.229551 0.317460 0.195767 0.156085 0.010554 0.271768 0.525066 0.754617 0.992084 0.007916 0.240106 0.477573 0.770449 1.000000 0.002639 0.203166 0.430079 0.686016 0.963061 0.548813 0.087071 0.364116 0.039683 0.082011 0.002646 0.002639 0.269129 0.437995 0.788918 1.000000 0.042216 0.253298 0.514512 0.765172 0.970976 0.071240 0.203166 0.562005 0.651715 0.934037 0.324538 0.343915 0.015831 0.245383 0.480211 0.757256 0.963061 0.374670 0.377309 0.248021 0.304233 0.185185 0.171958 0.007916 0.234828 0.493404 0.773087 1.000000 0.010554 0.248021 0.480211 0.720317 0.992084 0.002639 0.258575 0.535620 0.733509 0.994723 0.255937 0.313984 0.430079 0.153439 0.230159 0.293651 0.002639 0.216359 0.453826 0.720317 0.994723 0.007916 0.224274 0.472296 0.751979 1.000000 0.010554 0.271768 0.522427 0.754617 0.992084 0.319261 0.432718 0.248021 0.285714 0.171958 0.185185 0.007916 0.250660 0.527704 0.791557 1.000000 0.010554 0.226913 0.451187 0.701847 0.992084 0.002639 0.258575 0.535620 0.733509 0.994723 0.063325 0.089710 0.076517 0.058047 0.050132 0.071240 0.042216 0.092348 0.081794 0.044855 0.052770 0.021108 0.026385 0.002639 0.063325 0.076517 0.039578 0.018470 0.023747 0.005277 
>YAL033w
0.364162 0.283237 0.352601 0.191860 0.267442 0.180233 0.017341 0.294798 0.606936 0.872832 1.000000 0.034682 0.208092 0.375723 0.618497 0.942197 0.005780 0.248555 0.508671 0.676301 0.936416 0.427746 0.179191 0.393064 0.063953 0.063953 0.005814 0.005780 0.150289 0.410405 0.843931 1.000000 0.040462 0.075145 0.433526 0.508671 0.895954 0.231214 0.323699 0.578035 0.757225 0.936416 0.566474 0.325581 0.040462 0.260116 0.485549 0.676301 0.942197 0.341040 0.416185 0.242775 0.226744 0.162791 0.180233 0.034682 0.231214 0.468208 0.693642 1.000000 0.011561 0.277457 0.549133 0.791908 0.988439 0.005780 0.208092 0.502890 0.745665 0.947977 0.369942 0.242775 0.387283 0.162791 0.296512 0.174419 0.005780 0.248555 0.497110 0.676301 0.936416 0.034682 0.219653 0.381503 0.641618 0.942197 0.017341 0.289017 0.543353 0.855491 1.000000 0.294798 0.462428 0.242775 0.244186 0.133721 0.209302 0.034682 0.236994 0.468208 0.699422 1.000000 0.011561 0.260116 0.526012 0.774566 0.988439 0.005780 0.208092 0.502890 0.745665 0.947977 0.057803 0.080925 0.057803 0.075145 0.023121 0.069364 0.040462 0.034682 0.115607 0.028902 0.023121 0.023121 0.017341 0.023121 0.052023 0.098266 0.115607 0.028902 0.034682 0.000000 
>YAL034c
0.358354 0.401937 0.239709 0.281553 0.189320 0.189320 0.016949 0.179177 0.515738 0.767554 0.995157 0.004843 0.263923 0.484262 0.692494 0.997579 0.002421 0.273608 0.537530 0.825666 1.000000 0.615012 0.058111 0.326877 0.024272 0.101942 0.000000 0.002421 0.225182 0.491525 0.697337 1.000000 0.150121 0.162228 0.309927 0.595642 0.774818 0.055690 0.355932 0.539952 0.866828 0.995157 0.380145 0.461165 0.007264 0.220339 0.426150 0.765133 0.990315 0.387409 0.336562 0.276029 0.242718 0.184466 0.196602 0.004843 0.249395 0.498789 0.733656 0.992736 0.007264 0.184019 0.428571 0.757869 1.000000 0.002421 0.331719 0.539952 0.774818 0.997579 0.292978 0.331719 0.375303 0.194175 0.247573 0.228155 0.002421 0.283293 0.496368 0.791768 1.000000 0.004843 0.263923 0.489104 0.694915 0.992736 0.016949 0.184019 0.515738 0.760291 0.995157 0.297821 0.426150 0.276029 0.254854 0.148058 0.233010 0.004843 0.213075 0.486683 0.731235 0.992736 0.007264 0.225182 0.479419 0.745763 1.000000 0.002421 0.331719 0.539952 0.774818 0.997579 0.067797 0.077482 0.031477 0.048426 0.036320 0.096852 0.038741 0.050847 0.123487 0.036320 0.082324 0.016949 0.053269 0.007264 0.033898 0.096852 0.041162 0.019370 0.029056 0.012107 
>YAL034w-a
0.439446 0.238754 0.321799 0.194444 0.305556 0.159722 0.024221 0.321799 0.519031 0.782007 0.993080 0.006920 0.134948 0.349481 0.726644 0.968858 0.003460 0.249135 0.477509 0.671280 1.000000 0.325260 0.089965 0.584775 0.038194 0.065972 0.010417 0.003460 0.318339 0.709343 0.875433 1.000000 0.287197 0.304498 0.608997 0.813149 0.955017 0.027682 0.200692 0.446367 0.647059 0.993080 0.439446 0.451389 0.020761 0.155709 0.352941 0.695502 0.986159 0.301038 0.463668 0.235294 0.256944 0.145833 0.218750 0.006920 0.173010 0.591696 0.799308 0.993080 0.038062 0.287197 0.470588 0.740484 1.000000 0.003460 0.269896 0.484429 0.688581 0.920415 0.349481 0.207612 0.442907 0.138889 0.326389 0.173611 0.003460 0.235294 0.463668 0.671280 1.000000 0.006920 0.138408 0.515571 0.747405 0.968858 0.024221 0.321799 0.519031 0.782007 0.993080 0.269896 0.494810 0.235294 0.250000 0.125000 0.239583 0.006920 0.193772 0.602076 0.799308 0.993080 0.013841 0.262976 0.467128 0.740484 1.000000 0.003460 0.269896 0.484429 0.688581 0.920415 0.051903 0.110727 0.103806 0.086505 0.031142 0.055363 0.031142 0.038062 0.062284 0.051903 0.024221 0.003460 0.027682 0.006920 0.065744 0.148789 0.058824 0.020761 0.020761 0.000000 
>YAL035w
0.432136 0.313373 0.254491 0.221778 0.184815 0.157842 0.002994 0.187625 0.362275 0.686627 1.000000 0.001996 0.275449 0.483034 0.741517 0.998004 0.000998 0.451098 0.637725 0.809381 0.999002 0.423154 0.183633 0.393214 0.074925 0.066933 0.004995 0.000998 0.227545 0.415170 0.680639 1.000000 0.045908 0.524950 0.685629 0.878244 0.965070 0.012974 0.198603 0.452096 0.744511 0.997006 0.377246 0.281718 0.016966 0.477046 0.654691 0.817365 0.997006 0.351297 0.410180 0.238523 0.255744 0.153846 0.198801 0.001996 0.288423 0.487026 0.748503 0.998004 0.007984 0.260479 0.513972 0.746507 1.000000 0.000998 0.209581 0.466068 0.751497 0.997006 0.272455 0.283433 0.444112 0.144855 0.205794 0.208791 0.000998 0.458084 0.637725 0.809381 0.999002 0.001996 0.257485 0.469062 0.724551 0.998004 0.002994 0.191617 0.367265 0.690619 1.000000 0.308383 0.453094 0.238523 0.255744 0.143856 0.208791 0.001996 0.270459 0.481038 0.744511 0.998004 0.007984 0.272455 0.515968 0.754491 1.000000 0.000998 0.209581 0.466068 0.751497 0.997006 0.043912 0.121756 0.122754 0.060878 0.049900 0.032934 0.053892 0.083832 0.062874 0.046906 0.035928 0.011976 0.017964 0.006986 0.064870 0.091816 0.047904 0.016966 0.019960 0.005988 
>YAL036c
0.322493 0.346883 0.330623 0.209239 0.233696 0.247283 0.016260 0.306233 0.525745 0.772358 1.000000 0.005420 0.186992 0.384824 0.669377 0.989160 0.002710 0.289973 0.536585 0.769648 0.994580 0.414634 0.227642 0.357724 0.081522 0.065217 0.000000 0.002710 0.303523 0.531165 0.756098 1.000000 0.154472 0.289973 0.498645 0.804878 0.994580 0.010840 0.100271 0.433604 0.699187 0.902439 0.536585 0.402174 0.010840 0.262873 0.468835 0.728997 0.994580 0.379404 0.395664 0.224932 0.304348 0.168478 0.173913 0.005420 0.200542 0.455285 0.723577 0.989160 0.013550 0.311653 0.536585 0.758808 0.994580 0.002710 0.227642 0.495935 0.780488 1.000000 0.355014 0.303523 0.341463 0.217391 0.274457 0.179348 0.002710 0.295393 0.558266 0.775068 0.994580 0.005420 0.173442 0.349593 0.644986 0.989160 0.016260 0.311653 0.542005 0.783198 1.000000 0.330623 0.444444 0.224932 0.293478 0.146739 0.195652 0.005420 0.173442 0.373984 0.663957 0.989160 0.013550 0.325203 0.544715 0.766938 0.994580 0.002710 0.227642 0.495935 0.780488 1.000000 0.054201 0.078591 0.059621 0.065041 0.029810 0.035230 0.075881 0.062331 0.070461 0.056911 0.037940 0.018970 0.024390 0.010840 0.081301 0.105691 0.084011 0.016260 0.027100 0.005420 
>YAL037w
0.325843 0.322097 0.352060 0.195489 0.255639 0.218045 0.007491 0.228464 0.486891 0.820225 0.996255 0.029963 0.280899 0.483146 0.704120 0.992509 0.003745 0.217228 0.509363 0.711610 1.000000 0.468165 0.101124 0.430712 0.052632 0.112782 0.015038 0.003745 0.247191 0.494382 0.816479 1.000000 0.018727 0.164794 0.269663 0.625468 0.913858 0.048689 0.318352 0.539326 0.689139 0.966292 0.528090 0.443609 0.018727 0.232210 0.479401 0.692884 0.977528 0.344569 0.423221 0.232210 0.308271 0.127820 0.172932 0.007491 0.277154 0.483146 0.734082 0.992509 0.014981 0.205993 0.471910 0.722846 0.966292 0.003745 0.239700 0.584270 0.801498 1.000000 0.393258 0.273408 0.333333 0.199248 0.289474 0.176692 0.003745 0.220974 0.494382 0.700375 1.000000 0.029963 0.284644 0.475655 0.719101 0.992509 0.007491 0.239700 0.498127 0.816479 0.996255 0.295880 0.471910 0.232210 0.281955 0.116541 0.184211 0.007491 0.280899 0.475655 0.756554 0.992509 0.014981 0.198502 0.479401 0.715356 0.966292 0.003745 0.239700 0.584270 0.801498 1.000000 0.037453 0.063670 0.041199 0.052434 0.067416 0.063670 0.033708 0.041199 0.089888 0.078652 0.029963 0.007491 0.041199 0.018727 0.052434 0.116105 0.082397 0.026217 0.052434 0.003745 
>YAL038w
0.314000 0.378000 0.308000 0.252505 0.200401 0.228457 0.006000 0.244000 0.466000 0.712000 0.992000 0.004000 0.214000 0.556000 0.766000 0.998000 0.002000 0.284000 0.494000 0.736000 1.000000 0.362000 0.214000 0.424000 0.096192 0.088176 0.000000 0.002000 0.226000 0.426000 0.752000 1.000000 0.044000 0.216000 0.334000 0.660000 0.998000 0.006000 0.398000 0.572000 0.740000 0.940000 0.602000 0.340681 0.008000 0.268000 0.540000 0.770000 0.996000 0.412000 0.368000 0.220000 0.296593 0.196393 0.162325 0.004000 0.240000 0.544000 0.756000 0.998000 0.008000 0.274000 0.486000 0.708000 1.000000 0.002000 0.232000 0.450000 0.788000 0.982000 0.338000 0.334000 0.328000 0.222445 0.234469 0.230461 0.002000 0.266000 0.482000 0.730000 1.000000 0.004000 0.224000 0.574000 0.768000 0.998000 0.006000 0.238000 0.462000 0.714000 0.992000 0.348000 0.432000 0.220000 0.280561 0.164329 0.194389 0.004000 0.240000 0.526000 0.756000 0.998000 0.008000 0.272000 0.496000 0.724000 1.000000 0.002000 0.232000 0.450000 0.788000 0.982000 0.048000 0.074000 0.056000 0.064000 0.020000 0.052000 0.068000 0.086000 0.054000 0.076000 0.050000 0.014000 0.030000 0.014000 0.096000 0.070000 0.074000 0.022000 0.030000 0.002000 
>YAL039c
0.319703 0.394052 0.286245 0.212687 0.190299 0.208955 0.026022 0.267658 0.509294 0.754647 0.955390 0.007435 0.174721 0.434944 0.758364 1.000000 0.003717 0.271375 0.516729 0.706320 0.962825 0.635688 0.111524 0.252788 0.052239 0.029851 0.000000 0.003717 0.167286 0.338290 0.717472 1.000000 0.014870 0.342007 0.728625 0.806691 0.877323 0.360595 0.460967 0.524164 0.661710 0.962825 0.498141 0.365672 0.007435 0.349442 0.579926 0.769517 0.962825 0.434944 0.301115 0.263941 0.235075 0.208955 0.152985 0.007435 0.174721 0.423792 0.776952 1.000000 0.029740 0.278810 0.486989 0.695167 0.962825 0.003717 0.312268 0.576208 0.750929 0.959108 0.301115 0.349442 0.349442 0.175373 0.231343 0.201493 0.003717 0.278810 0.516729 0.724907 0.962825 0.007435 0.148699 0.416357 0.758364 1.000000 0.026022 0.282528 0.524164 0.750929 0.955390 0.327138 0.408922 0.263941 0.257463 0.160448 0.201493 0.007435 0.148699 0.423792 0.825279 0.996283 0.029740 0.256506 0.490706 0.698885 1.000000 0.003717 0.312268 0.576208 0.750929 0.959108 0.048327 0.052045 0.066914 0.070632 0.044610 0.037175 0.074349 0.048327 0.107807 0.026022 0.092937 0.029740 0.014870 0.014870 0.063197 0.063197 0.026022 0.052045 0.040892 0.026022 
>YAL040c
0.279310 0.422414 0.298276 0.189983 0.208981 0.224525 0.008621 0.237931 0.505172 0.687931 1.000000 0.003448 0.243103 0.541379 0.796552 0.998276 0.001724 0.250000 0.458621 0.656897 0.993103 0.534483 0.025862 0.439655 0.015544 0.063903 0.005181 0.001724 0.215517 0.703448 0.846552 1.000000 0.006897 0.306897 0.660345 0.713793 0.862069 0.008621 0.243103 0.417241 0.555172 0.917241 0.484483 0.369603 0.013793 0.281034 0.443103 0.655172 0.993103 0.425862 0.337931 0.236207 0.252159 0.183074 0.148532 0.003448 0.277586 0.579310 0.798276 0.998276 0.005172 0.250000 0.465517 0.641379 0.993103 0.001724 0.208621 0.468966 0.756897 1.000000 0.334483 0.365517 0.300000 0.212435 0.252159 0.174439 0.001724 0.246552 0.458621 0.656897 0.993103 0.003448 0.270690 0.587931 0.806897 0.998276 0.008621 0.212069 0.505172 0.705172 1.000000 0.358621 0.405172 0.236207 0.260794 0.157168 0.174439 0.003448 0.270690 0.568966 0.789655 0.998276 0.005172 0.256897 0.479310 0.667241 0.993103 0.001724 0.208621 0.468966 0.756897 1.000000 0.037931 0.058621 0.027586 0.041379 0.041379 0.072414 0.012069 0.072414 0.158621 0.074138 0.048276 0.020690 0.036207 0.018966 0.018966 0.122414 0.055172 0.020690 0.053448 0.008621 
>YAL041w
0.346604 0.352459 0.300937 0.225088 0.211020 0.184056 0.004684 0.297424 0.512881 0.762295 0.997658 0.002342 0.221311 0.536300 0.754098 1.000000 0.001171 0.228337 0.449649 0.724824 0.998829 0.429742 0.117096 0.453162 0.043376 0.069168 0.010551 0.001171 0.208431 0.553864 0.797424 1.000000 0.003513 0.570258 0.626464 0.744731 0.997658 0.031616 0.272834 0.444965 0.693208 0.987119 0.483607 0.410317 0.003513 0.251756 0.497658 0.756440 0.996487 0.352459 0.403981 0.243560 0.262603 0.133646 0.203986 0.002342 0.199063 0.508197 0.766979 0.985948 0.003513 0.264637 0.484778 0.735363 0.998829 0.001171 0.303279 0.509368 0.761124 1.000000 0.322014 0.302108 0.375878 0.164127 0.241501 0.194607 0.001171 0.234192 0.453162 0.723653 1.000000 0.002342 0.196721 0.526932 0.754098 0.985948 0.004684 0.304450 0.521077 0.763466 0.997658 0.307963 0.448478 0.243560 0.245018 0.111372 0.226260 0.002342 0.222482 0.557377 0.783372 0.985948 0.003513 0.233021 0.470726 0.731850 0.998829 0.001171 0.303279 0.509368 0.761124 1.000000 0.039813 0.072600 0.063232 0.042155 0.046838 0.081967 0.019906 0.043326 0.148712 0.053864 0.036300 0.029274 0.021077 0.008197 0.040984 0.098361 0.072600 0.025761 0.048009 0.007026 
>YAL042w
0.325301 0.368675 0.306024 0.234300 0.202899 0.234300 0.004819 0.240964 0.457831 0.698795 1.000000 0.009639 0.298795 0.551807 0.754217 0.997590 0.002410 0.187952 0.469880 0.771084 0.987952 0.508434 0.253012 0.238554 0.091787 0.043478 0.000000 0.002410 0.279518 0.481928 0.667470 1.000000 0.048193 0.212048 0.607229 0.759036 0.891566 0.012048 0.103614 0.387952 0.927711 0.987952 0.583133 0.304348 0.014458 0.233735 0.551807 0.773494 0.985542 0.392771 0.356627 0.250602 0.243961 0.239130 0.169082 0.009639 0.245783 0.440964 0.730120 0.997590 0.014458 0.224096 0.469880 0.725301 1.000000 0.002410 0.293976 0.583133 0.795181 0.995181 0.332530 0.303614 0.363855 0.198068 0.253623 0.217391 0.002410 0.200000 0.486747 0.761446 0.987952 0.009639 0.269880 0.527711 0.778313 0.997590 0.004819 0.267470 0.484337 0.710843 1.000000 0.327711 0.421687 0.250602 0.241546 0.207729 0.200483 0.009639 0.243373 0.465060 0.737349 0.997590 0.014458 0.228916 0.457831 0.713253 1.000000 0.002410 0.293976 0.583133 0.795181 0.995181 0.050602 0.050602 0.048193 0.065060 0.045783 0.065060 0.089157 0.057831 0.062651 0.053012 0.040964 0.038554 0.026506 0.024096 0.065060 0.084337 0.048193 0.021687 0.053012 0.009639 
>YAL043c
0.342675 0.342675 0.314650 0.234694 0.205357 0.193878 0.006369 0.285350 0.561783 0.757962 1.000000 0.002548 0.245860 0.487898 0.710828 0.992357 0.001274 0.202548 0.444586 0.797452 0.998726 0.426752 0.036943 0.536306 0.022959 0.086735 0.005102 0.001274 0.332484 0.532484 0.712102 1.000000 0.072611 0.216561 0.426752 0.531210 0.784713 0.003822 0.200000 0.449682 0.829299 0.997452 0.508280 0.382653 0.007643 0.200000 0.416561 0.763057 0.998726 0.370701 0.403822 0.225478 0.301020 0.132653 0.183673 0.002548 0.249682 0.515924 0.722293 0.996178 0.006369 0.238217 0.486624 0.750318 0.998726 0.001274 0.268790 0.461146 0.773248 1.000000 0.337580 0.304459 0.357962 0.183673 0.235969 0.209184 0.001274 0.202548 0.430573 0.763057 0.998726 0.002548 0.245860 0.489172 0.710828 0.992357 0.006369 0.284076 0.561783 0.768153 1.000000 0.319745 0.454777 0.225478 0.294643 0.110969 0.205357 0.002548 0.264968 0.515924 0.719745 0.996178 0.006369 0.234395 0.490446 0.746497 0.998726 0.001274 0.268790 0.461146 0.773248 1.000000 0.036943 0.077707 0.064968 0.061146 0.050955 0.050955 0.033121 0.048408 0.117197 0.059873 0.045860 0.015287 0.022930 0.005096 0.045860 0.132484 0.058599 0.026752 0.036943 0.008917 
>YAL044c
0.329412 0.388235 0.282353 0.289941 0.189349 0.230769 0.017647 0.270588 0.582353 0.776471 1.000000 0.023529 0.241176 0.441176 0.635294 0.988235 0.005882 0.205882 0.500000 0.811765 0.982353 0.441176 0.252941 0.305882 0.106509 0.082840 0.000000 0.005882 0.229412 0.494118 0.747059 1.000000 0.270588 0.364706 0.523529 0.629412 0.841176 0.011765 0.082353 0.423529 0.894118 0.982353 0.547059 0.390533 0.011765 0.211765 0.435294 0.647059 0.976471 0.382353 0.417647 0.200000 0.301775 0.130178 0.207101 0.023529 0.247059 0.452941 0.658824 1.000000 0.011765 0.305882 0.582353 0.770588 0.982353 0.005882 0.111765 0.311765 0.635294 0.988235 0.317647 0.335294 0.347059 0.224852 0.230769 0.236686 0.005882 0.211765 0.482353 0.788235 0.982353 0.023529 0.229412 0.441176 0.617647 0.970588 0.017647 0.270588 0.547059 0.776471 1.000000 0.341176 0.458824 0.200000 0.295858 0.112426 0.224852 0.023529 0.258824 0.452941 0.658824 1.000000 0.011765 0.294118 0.582353 0.764706 0.982353 0.005882 0.111765 0.311765 0.635294 0.988235 0.029412 0.052941 0.100000 0.047059 0.047059 0.052941 0.082353 0.052941 0.082353 0.076471 0.041176 0.017647 0.035294 0.000000 0.088235 0.094118 0.035294 0.029412 0.017647 0.017647 
>YAL044w-a
0.345455 0.381818 0.272727 0.321101 0.201835 0.247706 0.027273 0.254545 0.545455 0.763636 1.000000 0.045455 0.245455 0.445455 0.727273 0.990909 0.009091 0.181818 0.518182 0.700000 0.900000 0.427273 0.190909 0.381818 0.055046 0.091743 0.000000 0.009091 0.236364 0.409091 0.609091 1.000000 0.272727 0.309091 0.527273 0.836364 0.890909 0.027273 0.163636 0.663636 0.754545 0.981818 0.481818 0.440367 0.018182 0.290909 0.536364 0.736364 0.954545 0.336364 0.318182 0.345455 0.275229 0.220183 0.183486 0.045455 0.200000 0.409091 0.727273 0.990909 0.109091 0.327273 0.609091 0.800000 0.963636 0.009091 0.218182 0.400000 0.672727 1.000000 0.309091 0.290909 0.400000 0.220183 0.266055 0.275229 0.009091 0.200000 0.518182 0.709091 0.954545 0.045455 0.209091 0.445455 0.790909 0.990909 0.027273 0.327273 0.527273 0.763636 1.000000 0.290909 0.363636 0.345455 0.266055 0.211009 0.192661 0.045455 0.209091 0.418182 0.763636 0.990909 0.100000 0.309091 0.609091 0.800000 0.963636 0.009091 0.218182 0.400000 0.672727 1.000000 0.054545 0.100000 0.063636 0.036364 0.054545 0.036364 0.072727 0.081818 0.063636 0.036364 0.036364 0.054545 0.036364 0.009091 0.045455 0.090909 0.027273 0.045455 0.054545 0.000000 
>YAL046c
0.322034 0.347458 0.330508 0.170940 0.273504 0.230769 0.016949 0.322034 0.474576 0.737288 0.957627 0.033898 0.245763 0.533898 0.855932 1.000000 0.008475 0.177966 0.457627 0.677966 0.889831 0.542373 0.152542 0.305085 0.042735 0.059829 0.008547 0.008475 0.135593 0.271186 0.627119 1.000000 0.457627 0.483051 0.584746 0.618644 0.906780 0.313559 0.381356 0.703390 0.779661 0.864407 0.440678 0.461538 0.025424 0.237288 0.483051 0.745763 0.906780 0.364407 0.355932 0.279661 0.222222 0.179487 0.188034 0.033898 0.262712 0.533898 0.830508 1.000000 0.025424 0.271186 0.457627 0.703390 0.889831 0.008475 0.152542 0.347458 0.711864 0.957627 0.338983 0.313559 0.347458 0.213675 0.290598 0.153846 0.008475 0.186441 0.457627 0.677966 0.889831 0.033898 0.254237 0.533898 0.864407 1.000000 0.016949 0.322034 0.474576 0.737288 0.957627 0.305085 0.415254 0.279661 0.213675 0.153846 0.213675 0.050847 0.288136 0.559322 0.864407 1.000000 0.025424 0.271186 0.449153 0.694915 0.974576 0.008475 0.152542 0.347458 0.711864 0.957627 0.050847 0.101695 0.042373 0.033898 0.067797 0.025424 0.067797 0.025424 0.101695 0.076271 0.042373 0.025424 0.008475 0.016949 0.050847 0.101695 0.067797 0.050847 0.016949 0.025424 
>YAL047c
0.453376 0.258842 0.287781 0.228663 0.283414 0.146538 0.004823 0.262058 0.519293 0.728296 0.998392 0.011254 0.213826 0.422830 0.754019 1.000000 0.001608 0.254019 0.527331 0.762058 0.995177 0.149518 0.006431 0.844051 0.009662 0.041868 0.000000 0.001608 0.040193 0.144695 0.885852 1.000000 0.006431 0.006431 0.008039 0.139871 0.903537 0.062701 0.303859 0.528939 0.741158 0.990354 0.276527 0.405797 0.008039 0.215434 0.533762 0.779743 0.995177 0.282958 0.503215 0.213826 0.267311 0.107890 0.247987 0.011254 0.172026 0.406752 0.713826 1.000000 0.003215 0.281350 0.553055 0.755627 0.998392 0.001608 0.209003 0.493569 0.741158 0.988746 0.305466 0.218650 0.475884 0.120773 0.325282 0.206119 0.001608 0.254019 0.527331 0.758842 0.995177 0.011254 0.200965 0.422830 0.799035 1.000000 0.004823 0.262058 0.514469 0.726688 0.998392 0.258842 0.527331 0.213826 0.264090 0.103060 0.252818 0.012862 0.196141 0.406752 0.688103 0.993569 0.003215 0.274920 0.551447 0.765273 1.000000 0.001608 0.209003 0.493569 0.741158 0.988746 0.036977 0.085209 0.110932 0.064309 0.062701 0.093248 0.016077 0.030547 0.104502 0.043408 0.024116 0.022508 0.017685 0.000000 0.024116 0.127010 0.085209 0.016077 0.030547 0.004823 
>YAL048c
0.321752 0.323263 0.354985 0.204236 0.211800 0.234493 0.004532 0.261329 0.498489 0.750755 1.000000 0.003021 0.247734 0.527190 0.747734 0.998489 0.001511 0.231118 0.478852 0.735650 0.996979 0.468278 0.138973 0.392749 0.049924 0.074130 0.001513 0.001511 0.211480 0.521148 0.731118 1.000000 0.007553 0.072508 0.583082 0.752266 0.892749 0.132931 0.291541 0.469789 0.782477 0.992447 0.539275 0.360061 0.009063 0.259819 0.525680 0.756798 0.989426 0.373112 0.385196 0.241692 0.276853 0.201210 0.183056 0.003021 0.211480 0.495468 0.747734 0.998489 0.006042 0.237160 0.478852 0.756798 0.987915 0.001511 0.300604 0.516616 0.728097 1.000000 0.386707 0.271903 0.341390 0.219365 0.242057 0.180030 0.001511 0.243202 0.481873 0.740181 0.996979 0.003021 0.241692 0.548338 0.747734 0.998489 0.004532 0.258308 0.484894 0.750755 1.000000 0.302115 0.456193 0.241692 0.263238 0.163389 0.220877 0.003021 0.212991 0.495468 0.764350 0.998489 0.006042 0.232628 0.481873 0.755287 0.987915 0.001511 0.300604 0.516616 0.728097 1.000000 0.036254 0.075529 0.054381 0.075529 0.033233 0.046828 0.042296 0.043807 0.083082 0.057402 0.045317 0.019637 0.031722 0.025680 0.057402 0.123867 0.069486 0.012085 0.055891 0.010574 
>YAL049c
0.292683 0.386179 0.321138 0.212245 0.171429 0.220408 0.016260 0.231707 0.471545 0.764228 0.995935 0.008130 0.215447 0.524390 0.735772 0.991870 0.004065 0.247967 0.475610 0.739837 1.000000 0.520325 0.154472 0.325203 0.057143 0.057143 0.000000 0.004065 0.154472 0.402439 0.719512 1.000000 0.121951 0.186992 0.512195 0.699187 0.841463 0.227642 0.410569 0.544715 0.792683 0.987805 0.540650 0.342857 0.016260 0.272358 0.520325 0.707317 0.987805 0.406504 0.329268 0.264228 0.228571 0.220408 0.167347 0.008130 0.203252 0.447154 0.695122 0.991870 0.016260 0.243902 0.556911 0.760163 1.000000 0.004065 0.268293 0.471545 0.768293 0.987805 0.353659 0.317073 0.329268 0.208163 0.208163 0.191837 0.004065 0.247967 0.483740 0.743902 1.000000 0.008130 0.199187 0.508130 0.695122 0.991870 0.016260 0.235772 0.487805 0.768293 0.995935 0.345528 0.390244 0.264228 0.236735 0.171429 0.216327 0.008130 0.252033 0.487805 0.711382 0.991870 0.016260 0.235772 0.512195 0.747967 1.000000 0.004065 0.268293 0.471545 0.768293 0.987805 0.024390 0.081301 0.056911 0.073171 0.020325 0.036585 0.077236 0.101626 0.060976 0.032520 0.044715 0.036585 0.032520 0.016260 0.069106 0.069106 0.077236 0.012195 0.069106 0.008130 
>YAL051w
0.321872 0.342884 0.335244 0.205545 0.213193 0.237094 0.002865 0.200573 0.440306 0.753582 0.998090 0.004776 0.231137 0.494747 0.754537 1.000000 0.000955 0.311366 0.531996 0.735435 0.999045 0.456543 0.044890 0.498567 0.020076 0.073614 0.006692 0.000955 0.162369 0.465138 0.838586 1.000000 0.087870 0.368672 0.791786 0.808023 0.958930 0.023878 0.307545 0.511939 0.704871 0.995224 0.530086 0.367113 0.004776 0.338109 0.531996 0.741165 0.995224 0.358166 0.387775 0.254059 0.276291 0.170172 0.205545 0.004776 0.224451 0.493792 0.771729 1.000000 0.001910 0.266476 0.503343 0.745941 0.997135 0.000955 0.236867 0.505253 0.704871 0.999045 0.364852 0.288443 0.346705 0.208413 0.251434 0.180688 0.000955 0.307545 0.521490 0.731614 0.999045 0.004776 0.228271 0.497612 0.775549 1.000000 0.002865 0.200573 0.458453 0.746896 0.998090 0.294174 0.451767 0.254059 0.279159 0.138623 0.237094 0.004776 0.237822 0.526266 0.782235 1.000000 0.001910 0.255014 0.469914 0.739255 0.997135 0.000955 0.236867 0.505253 0.704871 0.999045 0.044890 0.062082 0.062082 0.052531 0.027698 0.072588 0.042980 0.044890 0.102197 0.051576 0.046800 0.024833 0.029608 0.017192 0.040115 0.108883 0.076409 0.031519 0.054441 0.006686 
>YAL053w
0.265645 0.357599 0.376756 0.194373 0.173913 0.242967 0.006386 0.314176 0.577267 0.826309 0.996169 0.007663 0.224777 0.432950 0.770115 0.998723 0.001277 0.270754 0.496807 0.692209 1.000000 0.388250 0.088123 0.523627 0.026854 0.052430 0.006394 0.001277 0.298851 0.785441 0.902937 1.000000 0.003831 0.090677 0.114943 0.192848 0.787995 0.005109 0.312899 0.504470 0.650064 0.897829 0.596424 0.294118 0.003831 0.251596 0.445722 0.665390 0.991060 0.375479 0.394636 0.229885 0.287724 0.164962 0.186701 0.007663 0.194125 0.408685 0.772669 0.997446 0.002554 0.279693 0.519796 0.735632 1.000000 0.001277 0.321839 0.572158 0.742018 0.998723 0.411239 0.316731 0.272031 0.241688 0.195652 0.180307 0.001277 0.277139 0.500639 0.687101 1.000000 0.007663 0.215837 0.416347 0.772669 0.997446 0.006386 0.301405 0.577267 0.822478 0.996169 0.329502 0.440613 0.229885 0.283887 0.145780 0.205882 0.007663 0.196679 0.402299 0.766284 0.991060 0.002554 0.259259 0.523627 0.744572 1.000000 0.001277 0.321839 0.572158 0.742018 0.998723 0.034483 0.044700 0.029374 0.047254 0.038314 0.071520 0.038314 0.080460 0.091954 0.071520 0.034483 0.006386 0.034483 0.011494 0.080460 0.108557 0.066411 0.019157 0.079183 0.011494 
>YAL054c
0.291725 0.413745 0.294530 0.226124 0.167135 0.228933 0.009818 0.196353 0.422160 0.760168 0.998597 0.002805 0.265077 0.503506 0.723703 0.995792 0.001403 0.277700 0.530154 0.798036 1.000000 0.496494 0.183731 0.319776 0.077247 0.071629 0.007022 0.001403 0.225806 0.517532 0.747546 1.000000 0.023843 0.333801 0.520337 0.776999 0.932679 0.007013 0.234222 0.417952 0.642356 0.997195 0.625526 0.348315 0.007013 0.297335 0.524544 0.741935 0.997195 0.419355 0.336606 0.244039 0.271067 0.195225 0.162921 0.002805 0.267882 0.506311 0.744741 0.995792 0.008415 0.241234 0.509116 0.768583 1.000000 0.001403 0.214586 0.483871 0.737728 0.998597 0.338008 0.342216 0.319776 0.224719 0.199438 0.205056 0.001403 0.277700 0.524544 0.762973 1.000000 0.002805 0.267882 0.504909 0.727910 0.995792 0.009818 0.196353 0.434783 0.757363 0.998597 0.353436 0.402525 0.244039 0.282303 0.161517 0.196629 0.002805 0.291725 0.510519 0.764376 0.995792 0.004208 0.237027 0.496494 0.743338 1.000000 0.001403 0.214586 0.483871 0.737728 0.998597 0.042076 0.065919 0.053296 0.067321 0.030856 0.032258 0.070126 0.078541 0.071529 0.065919 0.056101 0.028050 0.043478 0.009818 0.077139 0.081346 0.061711 0.011220 0.036466 0.016830 
>YAL055w
0.327778 0.361111 0.311111 0.251397 0.178771 0.195531 0.033333 0.277778 0.466667 0.738889 1.000000 0.011111 0.166667 0.411111 0.650000 0.983333 0.005556 0.355556 0.588889 0.794444 0.994444 0.511111 0.188889 0.300000 0.067039 0.100559 0.011173 0.005556 0.250000 0.461111 0.783333 1.000000 0.161111 0.355556 0.633333 0.761111 0.922222 0.044444 0.150000 0.444444 0.694444 0.983333 0.500000 0.335196 0.050000 0.350000 0.572222 0.755556 0.994444 0.427778 0.327778 0.244444 0.256983 0.201117 0.150838 0.011111 0.238889 0.511111 0.777778 0.994444 0.050000 0.233333 0.477778 0.766667 1.000000 0.005556 0.250000 0.444444 0.672222 0.911111 0.338889 0.322222 0.338889 0.184358 0.189944 0.240223 0.005556 0.288889 0.544444 0.761111 0.994444 0.011111 0.155556 0.411111 0.683333 0.983333 0.033333 0.294444 0.516667 0.722222 1.000000 0.355556 0.400000 0.244444 0.212291 0.178771 0.173184 0.027778 0.238889 0.527778 0.800000 0.983333 0.011111 0.255556 0.477778 0.761111 1.000000 0.005556 0.250000 0.444444 0.672222 0.911111 0.055556 0.088889 0.050000 0.077778 0.022222 0.033333 0.066667 0.061111 0.094444 0.055556 0.044444 0.011111 0.027778 0.027778 0.088889 0.055556 0.077778 0.022222 0.027778 0.011111 
>YAL056w
0.322727 0.379545 0.297727 0.210466 0.185438 0.225256 0.002273 0.235227 0.501136 0.770455 0.996591 0.004545 0.264773 0.504545 0.727273 1.000000 0.001136 0.243182 0.482955 0.763636 0.995455 0.609091 0.214773 0.176136 0.088737 0.047782 0.013652 0.001136 0.276136 0.504545 0.745455 1.000000 0.023864 0.393182 0.519318 0.822727 0.980682 0.032955 0.136364 0.234091 0.639773 0.989773 0.537500 0.393629 0.003409 0.293182 0.487500 0.764773 0.995455 0.396591 0.344318 0.259091 0.267349 0.209329 0.176337 0.004545 0.281818 0.535227 0.757955 1.000000 0.002273 0.229545 0.505682 0.781818 0.996591 0.001136 0.228409 0.455682 0.672727 0.992045 0.334091 0.318182 0.347727 0.207053 0.224118 0.196815 0.001136 0.237500 0.468182 0.740909 0.995455 0.004545 0.281818 0.534091 0.735227 1.000000 0.002273 0.236364 0.506818 0.756818 0.996591 0.325000 0.415909 0.259091 0.248009 0.169511 0.216155 0.004545 0.281818 0.548864 0.765909 1.000000 0.002273 0.243182 0.484091 0.772727 0.997727 0.001136 0.228409 0.455682 0.672727 0.992045 0.046591 0.068182 0.051136 0.064773 0.027273 0.064773 0.069318 0.039773 0.107955 0.043182 0.057955 0.025000 0.036364 0.013636 0.051136 0.084091 0.065909 0.029545 0.044318 0.009091 
>YAL058w
0.320717 0.352590 0.326693 0.245509 0.213573 0.207585 0.003984 0.284861 0.521912 0.743028 0.958167 0.007968 0.219124 0.484064 0.723108 1.000000 0.001992 0.245020 0.490040 0.786853 0.998008 0.635458 0.175299 0.189243 0.061876 0.041916 0.005988 0.001992 0.298805 0.515936 0.679283 1.000000 0.061753 0.219124 0.336653 0.784861 0.996016 0.005976 0.049801 0.848606 0.940239 0.992032 0.456175 0.395210 0.005976 0.203187 0.416335 0.749004 0.998008 0.360558 0.406375 0.233068 0.281437 0.147705 0.205589 0.007968 0.249004 0.498008 0.705179 1.000000 0.013944 0.241036 0.500000 0.762948 0.996016 0.001992 0.256972 0.474104 0.737052 0.998008 0.354582 0.298805 0.346614 0.185629 0.247505 0.227545 0.001992 0.237052 0.482072 0.772908 0.998008 0.007968 0.215139 0.488048 0.723108 1.000000 0.003984 0.284861 0.519920 0.737052 0.958167 0.276892 0.490040 0.233068 0.267465 0.125749 0.227545 0.007968 0.185259 0.416335 0.695219 1.000000 0.013944 0.292829 0.543825 0.752988 0.996016 0.001992 0.256972 0.474104 0.737052 0.998008 0.037849 0.053785 0.081673 0.049801 0.035857 0.061753 0.059761 0.051793 0.059761 0.055777 0.071713 0.025896 0.027888 0.011952 0.055777 0.093625 0.077689 0.025896 0.033865 0.027888 
>YAL059w
0.457547 0.297170 0.245283 0.317536 0.199052 0.175355 0.014151 0.254717 0.471698 0.726415 1.000000 0.056604 0.259434 0.547170 0.764151 0.976415 0.004717 0.198113 0.476415 0.735849 0.990566 0.377358 0.023585 0.599057 0.009479 0.132701 0.000000 0.004717 0.405660 0.683962 0.905660 1.000000 0.773585 0.773585 0.778302 0.783019 0.792453 0.009434 0.160377 0.382075 0.622642 0.896226 0.320755 0.360190 0.042453 0.216981 0.495283 0.716981 0.971698 0.353774 0.386792 0.259434 0.312796 0.218009 0.175355 0.056604 0.278302 0.547170 0.787736 0.985849 0.014151 0.240566 0.495283 0.778302 1.000000 0.004717 0.132075 0.415094 0.627358 0.957547 0.254717 0.287736 0.457547 0.170616 0.213270 0.303318 0.004717 0.136792 0.476415 0.716981 0.990566 0.056604 0.273585 0.547170 0.764151 0.976415 0.014151 0.254717 0.471698 0.726415 1.000000 0.330189 0.410377 0.259434 0.298578 0.213270 0.180095 0.056604 0.287736 0.547170 0.764151 0.985849 0.014151 0.240566 0.495283 0.811321 1.000000 0.004717 0.132075 0.415094 0.627358 0.957547 0.070755 0.132075 0.089623 0.066038 0.033019 0.066038 0.033019 0.094340 0.084906 0.051887 0.023585 0.000000 0.009434 0.000000 0.047170 0.099057 0.051887 0.014151 0.023585 0.009434 
>YAL060w
0.274869 0.379581 0.345550 0.209974 0.207349 0.299213 0.005236 0.235602 0.589005 0.840314 1.000000 0.007853 0.259162 0.471204 0.701571 0.992147 0.002618 0.248691 0.481675 0.735602 0.997382 0.481675 0.248691 0.269634 0.102362 0.070866 0.007874 0.002618 0.217277 0.418848 0.767016 1.000000 0.007853 0.099476 0.390052 0.696335 0.979058 0.303665 0.463351 0.596859 0.738220 0.947644 0.625654 0.330709 0.007853 0.259162 0.500000 0.719895 0.981675 0.403141 0.356021 0.240838 0.286089 0.217848 0.154856 0.007853 0.227749 0.455497 0.701571 0.992147 0.010471 0.303665 0.539267 0.803665 0.994764 0.002618 0.230366 0.549738 0.767016 1.000000 0.361257 0.319372 0.319372 0.272966 0.244094 0.194226 0.002618 0.238220 0.481675 0.727749 0.997382 0.007853 0.261780 0.486911 0.714660 0.992147 0.005236 0.235602 0.578534 0.811518 1.000000 0.324607 0.434555 0.240838 0.270341 0.170604 0.202100 0.007853 0.243455 0.486911 0.714660 0.992147 0.010471 0.253927 0.507853 0.777487 0.994764 0.002618 0.230366 0.549738 0.767016 1.000000 0.020942 0.081152 0.065445 0.054974 0.026178 0.026178 0.094241 0.065445 0.068063 0.041885 0.049738 0.044503 0.015707 0.028796 0.094241 0.070681 0.073298 0.028796 0.036649 0.013089 
>YAL061w
0.304556 0.381295 0.314149 0.192308 0.225962 0.237981 0.004796 0.258993 0.589928 0.846523 0.995204 0.007194 0.237410 0.474820 0.690647 1.000000 0.002398 0.230216 0.443645 0.702638 0.992806 0.462830 0.244604 0.292566 0.108173 0.069712 0.007212 0.002398 0.203837 0.446043 0.724221 1.000000 0.007194 0.107914 0.333333 0.630695 0.896882 0.290168 0.479616 0.654676 0.853717 0.992806 0.594724 0.336538 0.007194 0.247002 0.477218 0.688249 0.988010 0.402878 0.352518 0.244604 0.274038 0.194712 0.163462 0.007194 0.247002 0.477218 0.678657 1.000000 0.009592 0.232614 0.503597 0.805755 0.992806 0.002398 0.249400 0.541966 0.750600 0.997602 0.342926 0.309353 0.347722 0.223558 0.264423 0.177885 0.002398 0.232614 0.441247 0.697842 0.992806 0.007194 0.242206 0.477218 0.678657 1.000000 0.004796 0.251799 0.582734 0.834532 0.997602 0.326139 0.429257 0.244604 0.269231 0.161058 0.197115 0.007194 0.278177 0.510791 0.707434 1.000000 0.009592 0.230216 0.467626 0.779376 0.992806 0.002398 0.249400 0.541966 0.750600 0.997602 0.052758 0.055156 0.081535 0.059952 0.014388 0.040767 0.088729 0.086331 0.040767 0.050360 0.043165 0.043165 0.028777 0.033573 0.062350 0.076739 0.076739 0.023981 0.028777 0.011990 
>YAL062w
0.308534 0.391685 0.299781 0.245614 0.197368 0.232456 0.008753 0.207877 0.468271 0.746171 0.995624 0.004376 0.306346 0.507659 0.743982 0.993435 0.002188 0.229759 0.501094 0.735230 1.000000 0.336980 0.168490 0.494530 0.083333 0.083333 0.000000 0.002188 0.266958 0.525164 0.695842 1.000000 0.091904 0.142232 0.319475 0.557987 0.807440 0.010941 0.284464 0.514223 0.840263 0.989059 0.628009 0.324561 0.015317 0.258206 0.483589 0.746171 0.995624 0.409190 0.365427 0.225383 0.335526 0.173246 0.160088 0.004376 0.310722 0.542670 0.761488 0.995624 0.008753 0.207877 0.505470 0.746171 0.997812 0.002188 0.199125 0.402626 0.660832 1.000000 0.332604 0.350109 0.317287 0.241228 0.232456 0.219298 0.002188 0.229759 0.472648 0.728665 1.000000 0.004376 0.323851 0.538293 0.757112 0.993435 0.008753 0.207877 0.468271 0.739606 0.995624 0.365427 0.409190 0.225383 0.315789 0.153509 0.179825 0.004376 0.319475 0.542670 0.761488 0.995624 0.008753 0.201313 0.505470 0.757112 0.997812 0.002188 0.199125 0.402626 0.660832 1.000000 0.035011 0.067834 0.074398 0.045952 0.039387 0.045952 0.100656 0.087527 0.080963 0.050328 0.030635 0.008753 0.032823 0.013129 0.080963 0.059081 0.065646 0.021882 0.045952 0.013129 
>YAL063c
0.167171 0.593797 0.239032 0.199849 0.066616 0.274035 0.015129 0.212557 0.459909 0.757943 0.984871 0.001513 0.276853 0.522693 0.751891 0.998487 0.000756 0.198941 0.467474 0.712557 1.000000 0.934191 0.032526 0.033283 0.015140 0.004542 0.000000 0.000756 0.290469 0.524206 0.757943 1.000000 0.030257 0.060514 0.105144 0.124811 0.167927 0.002269 0.009834 0.018154 0.046899 0.999244 0.134644 0.071158 0.003026 0.046899 0.101362 0.156581 0.999244 0.611195 0.281392 0.107413 0.345193 0.133232 0.053747 0.001513 0.281392 0.518154 0.751135 0.998487 0.002269 0.236006 0.501513 0.764750 1.000000 0.000756 0.130862 0.353253 0.645234 0.993192 0.259455 0.570348 0.170197 0.282362 0.073429 0.197578 0.000756 0.167927 0.438729 0.704992 1.000000 0.001513 0.293495 0.530257 0.753404 0.998487 0.003782 0.212557 0.465961 0.767776 0.984871 0.541604 0.350983 0.107413 0.352763 0.112036 0.074943 0.001513 0.294251 0.529501 0.756430 0.998487 0.002269 0.227685 0.484871 0.751891 1.000000 0.000756 0.130862 0.353253 0.645234 0.993192 0.014372 0.015129 0.047655 0.027988 0.022693 0.039334 0.054463 0.051437 0.138427 0.269289 0.056732 0.003026 0.020424 0.012859 0.065809 0.037065 0.068835 0.016641 0.022693 0.015129 
>YAL063c-a
0.312500 0.281250 0.406250 0.200000 0.200000 0.221053 0.041667 0.239583 0.552083 0.770833 0.927083 0.031250 0.333333 0.541667 0.750000 0.989583 0.010417 0.156250 0.395833 0.645833 1.000000 0.312500 0.302083 0.385417 0.084211 0.063158 0.021053 0.010417 0.177083 0.354167 0.833333 1.000000 0.052083 0.114583 0.270833 0.750000 0.968750 0.156250 0.427083 0.520833 0.614583 0.791667 0.614583 0.294737 0.052083 0.218750 0.416667 0.677083 0.958333 0.291667 0.406250 0.302083 0.242105 0.157895 0.210526 0.020833 0.333333 0.531250 0.729167 0.989583 0.062500 0.208333 0.437500 0.708333 1.000000 0.010417 0.197917 0.604167 0.750000 0.916667 0.458333 0.197917 0.343750 0.189474 0.273684 0.126316 0.010417 0.177083 0.416667 0.708333 1.000000 0.031250 0.333333 0.531250 0.843750 0.989583 0.041667 0.239583 0.489583 0.760417 0.927083 0.239583 0.458333 0.302083 0.231579 0.105263 0.263158 0.052083 0.333333 0.531250 0.729167 0.989583 0.020833 0.208333 0.437500 0.708333 1.000000 0.010417 0.197917 0.604167 0.750000 0.916667 0.072917 0.083333 0.010417 0.052083 0.010417 0.083333 0.020833 0.031250 0.072917 0.062500 0.010417 0.031250 0.052083 0.041667 0.031250 0.093750 0.177083 0.010417 0.041667 0.010417 
>YAL064c-a
0.206349 0.476190 0.317460 0.144000 0.160000 0.408000 0.071429 0.246032 0.460317 0.769841 0.968254 0.015873 0.230159 0.523810 0.738095 1.000000 0.007937 0.253968 0.515873 0.730159 0.976190 0.547619 0.420635 0.031746 0.144000 0.016000 0.000000 0.007937 0.246032 0.444444 0.714286 1.000000 0.095238 0.214286 0.595238 0.746032 0.976190 0.269841 0.269841 0.277778 0.285714 0.293651 0.611111 0.400000 0.023810 0.222222 0.539683 0.714286 0.992063 0.492063 0.277778 0.230159 0.320000 0.216000 0.096000 0.015873 0.230159 0.468254 0.753968 1.000000 0.047619 0.309524 0.484127 0.746032 0.976190 0.007937 0.134921 0.555556 0.658730 0.992063 0.388889 0.388889 0.222222 0.376000 0.176000 0.160000 0.007937 0.253968 0.555556 0.730159 0.992063 0.015873 0.214286 0.420635 0.698413 1.000000 0.071429 0.309524 0.476190 0.793651 0.968254 0.388889 0.380952 0.230159 0.288000 0.176000 0.136000 0.015873 0.214286 0.468254 0.793651 0.960317 0.047619 0.309524 0.484127 0.738095 1.000000 0.007937 0.134921 0.555556 0.658730 0.992063 0.015873 0.023810 0.015873 0.079365 0.039683 0.031746 0.071429 0.071429 0.079365 0.087302 0.079365 0.015873 0.071429 0.023810 0.087302 0.055556 0.047619 0.023810 0.063492 0.015873 
>YAL064w
0.333333 0.287037 0.379630 0.242991 0.280374 0.214953 0.018519 0.240741 0.481481 0.675926 0.990741 0.027778 0.175926 0.527778 0.731481 1.000000 0.009259 0.277778 0.472222 0.768519 0.962963 0.481481 0.222222 0.296296 0.093458 0.056075 0.000000 0.009259 0.185185 0.527778 0.824074 1.000000 0.027778 0.481481 0.601852 0.657407 0.962963 0.092593 0.277778 0.351852 0.740741 0.814815 0.537037 0.448598 0.027778 0.194444 0.462963 0.759259 0.962963 0.296296 0.370370 0.333333 0.252336 0.224299 0.196262 0.037037 0.212963 0.546296 0.740741 1.000000 0.092593 0.277778 0.555556 0.796296 0.990741 0.009259 0.166667 0.435185 0.657407 0.935185 0.398148 0.250000 0.351852 0.196262 0.317757 0.224299 0.009259 0.250000 0.472222 0.768519 0.962963 0.037037 0.175926 0.527778 0.777778 1.000000 0.018519 0.240741 0.481481 0.675926 0.990741 0.212963 0.453704 0.333333 0.205607 0.149533 0.271028 0.037037 0.185185 0.407407 0.731481 0.981481 0.083333 0.277778 0.574074 0.787037 1.000000 0.009259 0.166667 0.435185 0.657407 0.935185 0.092593 0.055556 0.046296 0.018519 0.064815 0.055556 0.027778 0.027778 0.083333 0.055556 0.055556 0.018519 0.018519 0.027778 0.064815 0.111111 0.027778 0.027778 0.120370 0.000000 
>YAL065c
0.164062 0.585938 0.250000 0.251969 0.047244 0.251969 0.015625 0.195312 0.335938 0.617188 0.882812 0.023438 0.179688 0.429688 0.679688 0.976562 0.007812 0.445312 0.703125 0.914062 1.000000 0.671875 0.117188 0.210938 0.078740 0.031496 0.000000 0.007812 0.171875 0.382812 0.609375 1.000000 0.125000 0.218750 0.390625 0.453125 0.695312 0.757812 0.796875 0.851562 0.937500 0.992188 0.429688 0.236220 0.109375 0.398438 0.679688 0.804688 0.945312 0.570312 0.335938 0.093750 0.417323 0.102362 0.055118 0.023438 0.179688 0.429688 0.671875 0.976562 0.015625 0.320312 0.578125 0.851562 0.992188 0.007812 0.281250 0.414062 0.640625 1.000000 0.257812 0.562500 0.179688 0.251969 0.047244 0.267717 0.007812 0.445312 0.703125 0.898438 1.000000 0.023438 0.179688 0.437500 0.679688 0.976562 0.015625 0.195312 0.335938 0.617188 0.882812 0.554688 0.351562 0.093750 0.425197 0.094488 0.062992 0.023438 0.171875 0.421875 0.679688 0.976562 0.015625 0.335938 0.617188 0.835938 0.992188 0.007812 0.281250 0.414062 0.640625 1.000000 0.015625 0.015625 0.046875 0.007812 0.023438 0.054688 0.070312 0.093750 0.195312 0.187500 0.015625 0.015625 0.007812 0.000000 0.078125 0.054688 0.078125 0.015625 0.015625 0.007812 
>YAL066w
0.225490 0.274510 0.500000 0.108911 0.267327 0.287129 0.058824 0.274510 0.500000 0.823529 0.960784 0.029412 0.176471 0.450980 0.803922 0.980392 0.009804 0.235294 0.480392 0.686275 1.000000 0.176471 0.019608 0.803922 0.000000 0.079208 0.019802 0.009804 0.117647 0.764706 0.950980 1.000000 0.794118 0.794118 0.794118 0.794118 0.803922 0.039216 0.245098 0.460784 0.656863 0.911765 0.656863 0.356436 0.039216 0.245098 0.470588 0.666667 0.921569 0.215686 0.470588 0.313725 0.217822 0.099010 0.306931 0.029412 0.156863 0.666667 0.931373 0.990196 0.019608 0.235294 0.480392 0.725490 1.000000 0.009804 0.284314 0.460784 0.617647 0.921569 0.539216 0.186275 0.274510 0.227723 0.326733 0.089109 0.009804 0.245098 0.480392 0.686275 1.000000 0.029412 0.137255 0.490196 0.862745 0.980392 0.058824 0.274510 0.401961 0.823529 0.960784 0.166667 0.519608 0.313725 0.148515 0.089109 0.316832 0.029412 0.156863 0.519608 0.931373 0.980392 0.019608 0.225490 0.480392 0.725490 1.000000 0.009804 0.284314 0.460784 0.617647 0.921569 0.058824 0.068627 0.019608 0.009804 0.039216 0.029412 0.009804 0.009804 0.068627 0.068627 0.029412 0.049020 0.039216 0.019608 0.049020 0.186275 0.147059 0.039216 0.058824 0.000000 
>YAL067c
0.288364 0.342327 0.369309 0.175676 0.190878 0.277027 0.010118 0.173693 0.443508 0.731872 1.000000 0.003373 0.271501 0.480607 0.750422 0.994941 0.001686 0.298482 0.526138 0.748735 0.993255 0.325464 0.050590 0.623946 0.016892 0.087838 0.006757 0.001686 0.138280 0.499157 0.821248 1.000000 0.008432 0.037099 0.111298 0.180438 0.880270 0.006745 0.333895 0.521079 0.731872 0.951096 0.682968 0.222973 0.006745 0.320405 0.510961 0.755481 0.993255 0.332209 0.374368 0.293423 0.271959 0.187500 0.211149 0.005059 0.276560 0.529511 0.775717 0.996627 0.006745 0.244519 0.482293 0.720067 0.998314 0.001686 0.217538 0.483980 0.740304 1.000000 0.428331 0.268128 0.303541 0.250000 0.228041 0.145270 0.001686 0.288364 0.512648 0.740304 0.993255 0.005059 0.291737 0.522766 0.779089 0.994941 0.010118 0.173693 0.436762 0.731872 1.000000 0.291737 0.414840 0.293423 0.268581 0.160473 0.238176 0.005059 0.274874 0.522766 0.772344 0.996627 0.006745 0.251265 0.489039 0.725126 0.998314 0.001686 0.217538 0.483980 0.740304 1.000000 0.038786 0.065767 0.048904 0.050590 0.030354 0.053963 0.050590 0.057336 0.080944 0.052277 0.026981 0.015177 0.059022 0.013491 0.067454 0.096121 0.077572 0.018550 0.059022 0.037099 
>YAL067w-a
0.266667 0.293333 0.440000 0.162162 0.216216 0.378378 0.106667 0.360000 0.506667 0.733333 0.906667 0.026667 0.200000 0.493333 0.706667 0.986667 0.013333 0.186667 0.413333 0.693333 1.000000 0.573333 0.280000 0.146667 0.148649 0.040541 0.013514 0.013333 0.173333 0.426667 0.626667 1.000000 0.040000 0.253333 0.400000 0.560000 0.986667 0.720000 0.733333 0.773333 0.813333 0.906667 0.546667 0.513514 0.040000 0.213333 0.533333 0.760000 0.973333 0.306667 0.373333 0.320000 0.337838 0.243243 0.148649 0.026667 0.173333 0.426667 0.573333 1.000000 0.040000 0.240000 0.506667 0.813333 0.973333 0.013333 0.293333 0.653333 0.760000 0.986667 0.493333 0.226667 0.280000 0.324324 0.270270 0.135135 0.013333 0.213333 0.533333 0.773333 1.000000 0.026667 0.173333 0.280000 0.520000 0.946667 0.106667 0.360000 0.506667 0.733333 0.906667 0.160000 0.520000 0.320000 0.243243 0.081081 0.310811 0.066667 0.253333 0.453333 0.573333 0.946667 0.026667 0.173333 0.440000 0.706667 1.000000 0.013333 0.293333 0.653333 0.760000 0.986667 0.093333 0.080000 0.013333 0.026667 0.000000 0.053333 0.026667 0.013333 0.066667 0.026667 0.093333 0.013333 0.053333 0.053333 0.106667 0.120000 0.080000 0.013333 0.066667 0.000000 
>YAL068c
0.200000 0.508333 0.291667 0.176471 0.151261 0.327731 0.025000 0.266667 0.500000 0.725000 1.000000 0.041667 0.183333 0.483333 0.741667 0.991667 0.008333 0.258333 0.441667 0.733333 0.983333 0.416667 0.058333 0.525000 0.042017 0.092437 0.008403 0.008333 0.216667 0.533333 0.791667 1.000000 0.258333 0.258333 0.658333 0.966667 0.983333 0.033333 0.250000 0.400000 0.716667 0.925000 0.591667 0.436975 0.033333 0.258333 0.475000 0.733333 0.983333 0.475000 0.325000 0.200000 0.352941 0.151261 0.159664 0.041667 0.175000 0.491667 0.741667 0.991667 0.016667 0.258333 0.408333 0.691667 1.000000 0.008333 0.383333 0.516667 0.758333 0.966667 0.350000 0.433333 0.216667 0.319328 0.176471 0.184874 0.008333 0.283333 0.516667 0.733333 0.983333 0.041667 0.166667 0.491667 0.775000 0.991667 0.025000 0.266667 0.475000 0.716667 1.000000 0.433333 0.366667 0.200000 0.369748 0.117647 0.193277 0.041667 0.166667 0.466667 0.741667 0.991667 0.016667 0.275000 0.500000 0.725000 1.000000 0.008333 0.383333 0.516667 0.758333 0.966667 0.033333 0.025000 0.041667 0.041667 0.033333 0.025000 0.050000 0.158333 0.075000 0.108333 0.041667 0.016667 0.058333 0.000000 0.091667 0.066667 0.066667 0.033333 0.025000 0.008333 
>YAL068w-a
0.178571 0.500000 0.321429 0.156627 0.084337 0.337349 0.202381 0.404762 0.785714 0.892857 0.988095 0.023810 0.190476 0.392857 0.642857 1.000000 0.011905 0.166667 0.476190 0.666667 0.952381 0.559524 0.202381 0.238095 0.060241 0.036145 0.012048 0.011905 0.130952 0.273810 0.797619 1.000000 0.285714 0.321429 0.690476 0.738095 0.952381 0.404762 0.452381 0.511905 0.571429 0.666667 0.678571 0.313253 0.035714 0.261905 0.476190 0.642857 0.952381 0.357143 0.333333 0.309524 0.228916 0.240964 0.180723 0.035714 0.154762 0.392857 0.642857 1.000000 0.071429 0.440476 0.607143 0.821429 0.988095 0.011905 0.226190 0.404762 0.690476 0.952381 0.404762 0.321429 0.273810 0.265060 0.156627 0.156627 0.011905 0.250000 0.476190 0.666667 0.952381 0.035714 0.154762 0.392857 0.654762 1.000000 0.023810 0.238095 0.595238 0.869048 0.988095 0.238095 0.452381 0.309524 0.204819 0.144578 0.277108 0.035714 0.178571 0.380952 0.642857 1.000000 0.059524 0.309524 0.559524 0.773810 0.988095 0.011905 0.226190 0.404762 0.690476 0.952381 0.000000 0.059524 0.011905 0.011905 0.011905 0.083333 0.047619 0.023810 0.047619 0.107143 0.095238 0.095238 0.083333 0.023810 0.035714 0.095238 0.095238 0.011905 0.059524 0.000000 
>YAR002c-a
0.333333 0.319635 0.347032 0.229358 0.220183 0.165138 0.036530 0.287671 0.557078 0.748858 0.990868 0.018265 0.191781 0.424658 0.643836 0.958904 0.004566 0.205479 0.538813 0.858447 1.000000 0.305936 0.255708 0.438356 0.073394 0.027523 0.000000 0.004566 0.255708 0.365297 0.529680 1.000000 0.100457 0.210046 0.351598 0.484018 0.593607 0.009132 0.639269 0.748858 0.872146 0.981735 0.538813 0.348624 0.013699 0.200913 0.488584 0.767123 0.972603 0.356164 0.378995 0.264840 0.220183 0.174312 0.188073 0.018265 0.219178 0.442922 0.643836 0.958904 0.009132 0.264840 0.515982 0.753425 1.000000 0.004566 0.223744 0.557078 0.785388 0.990868 0.374429 0.264840 0.360731 0.142202 0.261468 0.188073 0.004566 0.178082 0.497717 0.803653 1.000000 0.018265 0.196347 0.456621 0.652968 0.958904 0.036530 0.287671 0.547945 0.748858 0.990868 0.324201 0.410959 0.264840 0.211009 0.165138 0.197248 0.018265 0.251142 0.442922 0.652968 0.958904 0.009132 0.242009 0.506849 0.739726 1.000000 0.004566 0.223744 0.557078 0.785388 0.990868 0.036530 0.086758 0.054795 0.068493 0.063927 0.022831 0.063927 0.086758 0.054795 0.050228 0.009132 0.027397 0.027397 0.022831 0.068493 0.100457 0.068493 0.018265 0.050228 0.018265 
>YAR002w
0.365492 0.434137 0.200371 0.312268 0.133829 0.185874 0.005566 0.230056 0.532468 0.769944 0.990724 0.003711 0.278293 0.473098 0.710575 0.998145 0.001855 0.233766 0.499072 0.795918 1.000000 0.725417 0.090909 0.183673 0.050186 0.057621 0.009294 0.001855 0.309833 0.547310 0.758813 1.000000 0.066790 0.174397 0.426716 0.792208 0.959184 0.007421 0.185529 0.269017 0.543599 0.994434 0.304267 0.379182 0.016698 0.228200 0.447124 0.708720 0.994434 0.430427 0.341373 0.228200 0.302974 0.198885 0.131970 0.009276 0.289425 0.491651 0.730983 0.998145 0.011132 0.248609 0.523191 0.775510 0.994434 0.001855 0.183673 0.447124 0.736549 1.000000 0.228200 0.395176 0.376623 0.197026 0.163569 0.282528 0.001855 0.233766 0.463822 0.755102 1.000000 0.009276 0.287570 0.484230 0.721707 0.998145 0.003711 0.215213 0.530612 0.769944 0.990724 0.365492 0.406308 0.228200 0.317844 0.169145 0.161710 0.009276 0.287570 0.480519 0.730983 0.998145 0.011132 0.248609 0.534323 0.764378 0.994434 0.001855 0.183673 0.447124 0.736549 1.000000 0.038961 0.096475 0.076067 0.035250 0.033395 0.085343 0.037106 0.074212 0.161410 0.057514 0.064935 0.011132 0.027829 0.000000 0.057514 0.046382 0.042672 0.011132 0.042672 0.000000 
>YAR003w
0.323944 0.340376 0.335681 0.204706 0.232941 0.225882 0.004695 0.295775 0.577465 0.845070 0.995305 0.018779 0.213615 0.448357 0.685446 1.000000 0.002347 0.220657 0.457746 0.723005 0.992958 0.516432 0.436620 0.046948 0.160000 0.032941 0.000000 0.002347 0.239437 0.502347 0.779343 1.000000 0.068075 0.274648 0.485915 0.692488 0.992958 0.011737 0.044601 0.887324 0.938967 0.962441 0.570423 0.362353 0.007042 0.234742 0.453052 0.690141 0.992958 0.368545 0.413146 0.218310 0.282353 0.171765 0.188235 0.016432 0.211268 0.417840 0.701878 1.000000 0.004695 0.307512 0.575117 0.795775 0.995305 0.002347 0.241784 0.460094 0.697183 0.992958 0.370892 0.276995 0.352113 0.192941 0.275294 0.185882 0.002347 0.230047 0.474178 0.739437 0.992958 0.018779 0.208920 0.438967 0.701878 1.000000 0.004695 0.295775 0.561033 0.835681 0.995305 0.302817 0.478873 0.218310 0.268235 0.152941 0.207059 0.016432 0.239437 0.469484 0.708920 1.000000 0.004695 0.253521 0.532864 0.781690 0.995305 0.002347 0.241784 0.460094 0.697183 0.992958 0.039906 0.044601 0.089202 0.068075 0.035211 0.046948 0.042254 0.046948 0.089202 0.056338 0.042254 0.028169 0.035211 0.023474 0.063380 0.098592 0.079812 0.011737 0.032864 0.025822 
>YAR007c
0.383253 0.336554 0.280193 0.291935 0.220968 0.203226 0.008052 0.238325 0.478261 0.771337 0.993559 0.003221 0.246377 0.516908 0.723027 1.000000 0.001610 0.252818 0.513688 0.752013 0.998390 0.508857 0.315620 0.175523 0.090323 0.045161 0.003226 0.001610 0.223833 0.442834 0.708535 1.000000 0.045089 0.342995 0.531401 0.763285 0.964573 0.012882 0.304348 0.653784 0.887279 0.996779 0.468599 0.335484 0.006441 0.283414 0.518519 0.760064 0.990338 0.365539 0.392915 0.241546 0.308065 0.200000 0.175806 0.003221 0.249597 0.541063 0.747182 1.000000 0.006441 0.247987 0.491143 0.755233 0.998390 0.001610 0.204509 0.466989 0.745572 0.993559 0.312399 0.289855 0.397746 0.190323 0.262903 0.272581 0.001610 0.247987 0.510467 0.761675 0.998390 0.003221 0.257649 0.537842 0.723027 1.000000 0.008052 0.235105 0.470209 0.768116 0.993559 0.323671 0.434783 0.241546 0.283871 0.179032 0.196774 0.003221 0.241546 0.541063 0.739130 1.000000 0.006441 0.259259 0.495974 0.761675 0.998390 0.001610 0.204509 0.466989 0.745572 0.993559 0.053140 0.062802 0.059581 0.067633 0.051530 0.088567 0.049919 0.075684 0.072464 0.057971 0.033816 0.014493 0.032206 0.008052 0.049919 0.077295 0.066023 0.016103 0.051530 0.011272 
>YAR008w
0.345455 0.316364 0.338182 0.182482 0.233577 0.215328 0.025455 0.280000 0.443636 0.640000 0.981818 0.007273 0.287273 0.632727 0.796364 1.000000 0.003636 0.174545 0.447273 0.734545 0.996364 0.432727 0.170909 0.396364 0.065693 0.094891 0.007299 0.003636 0.221818 0.563636 0.767273 1.000000 0.018182 0.218182 0.756364 0.923636 0.985455 0.029091 0.250909 0.360000 0.527273 0.890909 0.534545 0.299270 0.010909 0.174545 0.523636 0.781818 0.985455 0.349091 0.381818 0.269091 0.277372 0.156934 0.233577 0.007273 0.283636 0.570909 0.770909 1.000000 0.014545 0.200000 0.418182 0.672727 0.981818 0.003636 0.301818 0.541818 0.745455 0.996364 0.363636 0.265455 0.370909 0.193431 0.284672 0.160584 0.003636 0.181818 0.494545 0.749091 0.996364 0.007273 0.283636 0.581818 0.792727 1.000000 0.025455 0.280000 0.450909 0.658182 0.981818 0.316364 0.414545 0.269091 0.270073 0.149635 0.240876 0.025455 0.298182 0.570909 0.770909 1.000000 0.007273 0.185455 0.418182 0.698182 0.981818 0.003636 0.301818 0.541818 0.745455 0.996364 0.058182 0.076364 0.054545 0.080000 0.040000 0.036364 0.072727 0.050909 0.069091 0.043636 0.029091 0.025455 0.025455 0.003636 0.040000 0.123636 0.087273 0.021818 0.047273 0.014545 
>YAR009c
0.344482 0.381271 0.274247 0.258577 0.200000 0.212552 0.001672 0.292642 0.535117 0.759197 0.997492 0.002508 0.240803 0.450669 0.693980 1.000000 0.000836 0.209866 0.546823 0.774247 0.999164 0.610368 0.142977 0.246656 0.058577 0.045188 0.001674 0.000836 0.277592 0.430602 0.628763 1.000000 0.004181 0.250000 0.619565 0.729933 0.976589 0.032609 0.200669 0.696488 0.840301 0.998328 0.477425 0.364854 0.002508 0.210702 0.605351 0.806856 0.998328 0.369565 0.367057 0.263378 0.273640 0.191632 0.194979 0.002508 0.238294 0.450669 0.693980 0.995819 0.001672 0.272575 0.521739 0.772575 0.999164 0.000836 0.231605 0.560201 0.769231 1.000000 0.321070 0.301839 0.377090 0.195816 0.248536 0.227615 0.000836 0.224916 0.562709 0.777592 0.999164 0.002508 0.242475 0.446488 0.688963 0.995819 0.001672 0.282609 0.522575 0.752508 1.000000 0.303512 0.433110 0.263378 0.263598 0.163180 0.223431 0.002508 0.247492 0.451505 0.706522 0.995819 0.001672 0.256689 0.494147 0.760033 0.999164 0.000836 0.231605 0.560201 0.769231 1.000000 0.044314 0.082776 0.057692 0.058528 0.036789 0.064381 0.040134 0.039298 0.093645 0.071906 0.056856 0.032609 0.046823 0.009197 0.036789 0.088629 0.082776 0.018395 0.030100 0.008361 
>YAR010c
0.327273 0.459091 0.213636 0.307517 0.143508 0.182232 0.004545 0.334091 0.600000 0.815909 0.995455 0.006818 0.193182 0.381818 0.725000 1.000000 0.002273 0.320455 0.527273 0.690909 0.988636 0.675000 0.038636 0.286364 0.027335 0.050114 0.000000 0.002273 0.188636 0.356818 0.727273 1.000000 0.040909 0.047727 0.477273 0.872727 0.970455 0.009091 0.534091 0.622727 0.736364 0.909091 0.381818 0.373576 0.013636 0.263636 0.502273 0.675000 0.988636 0.445455 0.331818 0.222727 0.293850 0.198178 0.152620 0.006818 0.202273 0.393182 0.702273 0.997727 0.004545 0.293182 0.570455 0.756818 0.995455 0.002273 0.275000 0.540909 0.759091 1.000000 0.252273 0.388636 0.359091 0.179954 0.189066 0.289294 0.002273 0.302273 0.515909 0.704545 1.000000 0.006818 0.188636 0.370455 0.684091 0.997727 0.004545 0.263636 0.600000 0.811364 0.995455 0.347727 0.429545 0.222727 0.296128 0.154897 0.195900 0.006818 0.209091 0.450000 0.722727 0.997727 0.004545 0.250000 0.500000 0.720455 0.995455 0.002273 0.275000 0.540909 0.759091 1.000000 0.031818 0.056818 0.040909 0.047727 0.065909 0.084091 0.034091 0.050000 0.122727 0.093182 0.088636 0.031818 0.038636 0.009091 0.038636 0.052273 0.050000 0.027273 0.029545 0.006818 
>YAR014c
0.418670 0.376238 0.205092 0.270538 0.164306 0.165722 0.004243 0.256011 0.487977 0.708628 1.000000 0.002829 0.222065 0.517680 0.773692 0.974540 0.001414 0.254597 0.462518 0.746818 0.997171 0.657709 0.096181 0.246110 0.050992 0.087819 0.005666 0.001414 0.275813 0.512023 0.734088 1.000000 0.025460 0.271570 0.418670 0.644979 0.929279 0.024045 0.188119 0.507779 0.823197 0.997171 0.359264 0.371105 0.011315 0.241867 0.449788 0.738331 0.997171 0.445545 0.340877 0.213579 0.291785 0.186969 0.135977 0.002829 0.257426 0.506365 0.745403 0.992928 0.004243 0.237624 0.468175 0.743989 0.997171 0.001414 0.241867 0.523338 0.749646 1.000000 0.234795 0.323904 0.441301 0.168555 0.198300 0.245042 0.001414 0.254597 0.462518 0.738331 0.997171 0.002829 0.229137 0.524752 0.775106 0.974540 0.004243 0.246110 0.483734 0.711457 1.000000 0.397454 0.388967 0.213579 0.304533 0.168555 0.154391 0.002829 0.253182 0.506365 0.734088 0.992928 0.004243 0.243281 0.468175 0.756719 0.997171 0.001414 0.241867 0.523338 0.749646 1.000000 0.042433 0.062235 0.090523 0.117397 0.035361 0.070721 0.046676 0.048091 0.141443 0.043847 0.043847 0.022631 0.029703 0.004243 0.045262 0.062235 0.036775 0.019802 0.031117 0.005658 
>YAR015w
0.346405 0.352941 0.300654 0.288525 0.203279 0.193443 0.016340 0.284314 0.552288 0.761438 0.990196 0.006536 0.274510 0.506536 0.774510 1.000000 0.003268 0.196078 0.395425 0.718954 0.993464 0.434641 0.235294 0.330065 0.124590 0.059016 0.000000 0.003268 0.225490 0.486928 0.781046 1.000000 0.045752 0.130719 0.395425 0.689542 0.800654 0.173203 0.316993 0.607843 0.856209 0.980392 0.503268 0.386885 0.009804 0.209150 0.470588 0.722222 0.980392 0.366013 0.379085 0.254902 0.318033 0.200000 0.186885 0.006536 0.261438 0.526144 0.774510 0.996732 0.009804 0.235294 0.483660 0.732026 0.977124 0.003268 0.245098 0.467320 0.790850 1.000000 0.339869 0.294118 0.366013 0.186885 0.249180 0.239344 0.003268 0.205882 0.408497 0.725490 0.993464 0.006536 0.264706 0.513072 0.738562 0.996732 0.016340 0.300654 0.545752 0.761438 1.000000 0.320261 0.424837 0.254902 0.301639 0.183607 0.203279 0.006536 0.232026 0.539216 0.781046 0.996732 0.009804 0.241830 0.483660 0.715686 0.977124 0.003268 0.245098 0.467320 0.790850 1.000000 0.039216 0.094771 0.084967 0.068627 0.029412 0.029412 0.062092 0.062092 0.065359 0.062092 0.042484 0.019608 0.039216 0.003268 0.068627 0.094771 0.071895 0.009804 0.035948 0.016340 
>YAR018c
0.372414 0.335632 0.291954 0.251152 0.244240 0.186636 0.006897 0.216092 0.478161 0.800000 1.000000 0.004598 0.280460 0.510345 0.714943 0.997701 0.002299 0.236782 0.505747 0.726437 0.988506 0.556322 0.119540 0.324138 0.048387 0.089862 0.002304 0.002299 0.349425 0.514943 0.795402 1.000000 0.059770 0.101149 0.204598 0.358621 0.563218 0.009195 0.278161 0.622989 0.758621 0.958621 0.482759 0.364055 0.013793 0.262069 0.450575 0.673563 0.997701 0.291954 0.402299 0.305747 0.202765 0.202765 0.216590 0.027586 0.319540 0.531034 0.705747 0.993103 0.011494 0.225287 0.485057 0.777011 0.990805 0.002299 0.220690 0.471264 0.742529 1.000000 0.360920 0.234483 0.404598 0.165899 0.329493 0.184332 0.002299 0.243678 0.485057 0.714943 0.997701 0.027586 0.319540 0.551724 0.724138 0.993103 0.004598 0.213793 0.464368 0.790805 1.000000 0.232184 0.462069 0.305747 0.202765 0.165899 0.253456 0.027586 0.321839 0.531034 0.724138 0.993103 0.011494 0.232184 0.487356 0.751724 0.990805 0.002299 0.220690 0.471264 0.742529 1.000000 0.059770 0.080460 0.085057 0.043678 0.064368 0.039080 0.052874 0.029885 0.066667 0.039080 0.045977 0.032184 0.068966 0.013793 0.057471 0.087356 0.068966 0.022989 0.032184 0.009195 
>YAR019c
0.301848 0.351129 0.347023 0.188078 0.218911 0.244604 0.002053 0.249487 0.489733 0.776181 0.998973 0.003080 0.227926 0.477413 0.712526 1.000000 0.001027 0.278234 0.521561 0.753593 0.997947 0.452772 0.135524 0.411704 0.054471 0.070915 0.013361 0.001027 0.260780 0.438398 0.745380 1.000000 0.025667 0.092402 0.427105 0.669405 0.996920 0.024641 0.286448 0.530801 0.749487 0.951745 0.549281 0.357657 0.015400 0.221766 0.478439 0.719713 0.997947 0.366530 0.389117 0.244353 0.268243 0.170606 0.190134 0.003080 0.253593 0.517454 0.745380 1.000000 0.002053 0.220739 0.494867 0.764887 0.998973 0.001027 0.261807 0.483573 0.709446 0.997947 0.380903 0.293634 0.325462 0.218911 0.261048 0.162384 0.001027 0.258727 0.497947 0.749487 0.997947 0.003080 0.243326 0.515400 0.732033 1.000000 0.002053 0.239220 0.482546 0.762834 0.998973 0.308008 0.447639 0.244353 0.258993 0.144913 0.215827 0.003080 0.235113 0.514374 0.745380 1.000000 0.002053 0.249487 0.497947 0.764887 0.998973 0.001027 0.261807 0.483573 0.709446 0.997947 0.034908 0.070842 0.043121 0.058522 0.027721 0.066735 0.029774 0.052361 0.105749 0.061602 0.044148 0.023614 0.033881 0.014374 0.053388 0.113963 0.084189 0.017454 0.052361 0.011294 
>YAR020c
0.181818 0.527273 0.290909 0.129630 0.166667 0.314815 0.054545 0.509091 0.581818 0.672727 0.927273 0.090909 0.236364 0.381818 0.709091 0.981818 0.018182 0.127273 0.600000 0.727273 1.000000 0.236364 0.109091 0.654545 0.018519 0.055556 0.055556 0.018182 0.054545 0.490909 0.545455 1.000000 0.600000 0.600000 0.636364 0.654545 0.745455 0.072727 0.218182 0.381818 0.800000 0.963636 0.709091 0.296296 0.072727 0.218182 0.436364 0.727273 0.963636 0.490909 0.345455 0.163636 0.333333 0.074074 0.185185 0.090909 0.218182 0.363636 0.527273 0.981818 0.036364 0.200000 0.600000 0.690909 0.927273 0.018182 0.054545 0.745455 0.872727 1.000000 0.345455 0.454545 0.200000 0.277778 0.203704 0.129630 0.018182 0.127273 0.636364 0.763636 1.000000 0.090909 0.218182 0.345455 0.454545 0.981818 0.054545 0.509091 0.581818 0.800000 0.927273 0.490909 0.345455 0.163636 0.333333 0.074074 0.185185 0.090909 0.218182 0.363636 0.527273 0.981818 0.036364 0.200000 0.600000 0.690909 0.927273 0.018182 0.054545 0.745455 0.872727 1.000000 0.036364 0.018182 0.054545 0.036364 0.018182 0.018182 0.054545 0.218182 0.109091 0.072727 0.000000 0.018182 0.054545 0.000000 0.109091 0.090909 0.054545 0.018182 0.018182 0.000000 
>YAR023c
0.262570 0.351955 0.385475 0.230337 0.207865 0.207865 0.016760 0.374302 0.608939 0.782123 0.966480 0.055866 0.273743 0.525140 0.770950 0.994413 0.005587 0.156425 0.340782 0.620112 1.000000 0.346369 0.022346 0.631285 0.011236 0.089888 0.000000 0.005587 0.402235 0.653631 0.770950 1.000000 0.536313 0.536313 0.541899 0.547486 0.553073 0.027933 0.178771 0.357542 0.687151 0.949721 0.541899 0.325843 0.022346 0.150838 0.312849 0.586592 0.983240 0.340782 0.396648 0.262570 0.297753 0.162921 0.202247 0.055866 0.262570 0.530726 0.770950 0.994413 0.011173 0.178771 0.413408 0.748603 1.000000 0.005587 0.312849 0.513966 0.642458 0.955307 0.424581 0.290503 0.284916 0.207865 0.252809 0.196629 0.005587 0.167598 0.418994 0.648045 1.000000 0.055866 0.251397 0.497207 0.770950 0.994413 0.016760 0.374302 0.592179 0.782123 0.966480 0.262570 0.474860 0.262570 0.280899 0.112360 0.252809 0.055866 0.206704 0.497207 0.770950 0.994413 0.011173 0.217877 0.463687 0.748603 1.000000 0.005587 0.312849 0.513966 0.642458 0.955307 0.027933 0.055866 0.050279 0.027933 0.055866 0.044693 0.039106 0.067039 0.055866 0.072626 0.055866 0.022346 0.039106 0.022346 0.072626 0.083799 0.089385 0.022346 0.055866 0.039106 
>YAR027w
0.276596 0.336170 0.387234 0.226496 0.183761 0.205128 0.008511 0.187234 0.565957 0.800000 0.991489 0.012766 0.246809 0.591489 0.770213 1.000000 0.004255 0.251064 0.378723 0.604255 0.995745 0.404255 0.017021 0.578723 0.008547 0.102564 0.000000 0.004255 0.114894 0.595745 0.778723 1.000000 0.621277 0.621277 0.625532 0.629787 0.634043 0.089362 0.263830 0.442553 0.680851 0.970213 0.544681 0.350427 0.042553 0.246809 0.395745 0.659574 0.987234 0.310638 0.425532 0.263830 0.277778 0.162393 0.200855 0.012766 0.195745 0.506383 0.753191 1.000000 0.008511 0.242553 0.421277 0.727660 0.995745 0.004255 0.293617 0.591489 0.706383 0.974468 0.429787 0.259574 0.310638 0.179487 0.226496 0.200855 0.004255 0.255319 0.395745 0.629787 0.995745 0.012766 0.212766 0.514894 0.757447 1.000000 0.008511 0.200000 0.587234 0.782979 0.991489 0.238298 0.497872 0.263830 0.269231 0.115385 0.247863 0.012766 0.165957 0.506383 0.753191 0.991489 0.008511 0.238298 0.429787 0.740426 1.000000 0.004255 0.293617 0.591489 0.706383 0.974468 0.025532 0.063830 0.080851 0.034043 0.021277 0.051064 0.029787 0.055319 0.063830 0.055319 0.055319 0.034043 0.042553 0.017021 0.059574 0.106383 0.106383 0.021277 0.059574 0.017021 
>YAR028w
0.264957 0.384615 0.350427 0.210300 0.141631 0.240343 0.008547 0.209402 0.568376 0.816239 0.991453 0.012821 0.256410 0.572650 0.769231 1.000000 0.004274 0.239316 0.380342 0.585470 0.995726 0.418803 0.017094 0.564103 0.008584 0.068670 0.000000 0.004274 0.123932 0.602564 0.769231 1.000000 0.619658 0.619658 0.623932 0.628205 0.632479 0.085470 0.247863 0.444444 0.670940 0.970085 0.521368 0.343348 0.042735 0.243590 0.388889 0.653846 0.987179 0.367521 0.371795 0.260684 0.236052 0.180258 0.175966 0.012821 0.213675 0.534188 0.769231 1.000000 0.008547 0.235043 0.431624 0.700855 0.995726 0.004274 0.294872 0.559829 0.666667 0.974359 0.401709 0.307692 0.290598 0.214592 0.184549 0.201717 0.004274 0.243590 0.405983 0.623932 0.995726 0.012821 0.269231 0.538462 0.777778 1.000000 0.008547 0.200855 0.564103 0.803419 0.991453 0.311966 0.427350 0.260684 0.248927 0.145923 0.210300 0.012821 0.269231 0.534188 0.764957 0.991453 0.008547 0.217949 0.440171 0.705128 1.000000 0.004274 0.294872 0.559829 0.666667 0.974359 0.017094 0.059829 0.068376 0.047009 0.029915 0.042735 0.034188 0.072650 0.098291 0.059829 0.042735 0.025641 0.051282 0.012821 0.068376 0.085470 0.076923 0.047009 0.047009 0.012821 
>YAR029w
0.378378 0.324324 0.297297 0.260274 0.205479 0.178082 0.027027 0.297297 0.594595 0.797297 0.972973 0.054054 0.202703 0.472973 0.702703 0.932432 0.013514 0.148649 0.378378 0.756757 1.000000 0.689189 0.054054 0.256757 0.027397 0.082192 0.000000 0.013514 0.270270 0.594595 0.770270 1.000000 0.202703 0.202703 0.216216 0.229730 0.243243 0.040541 0.081081 0.337838 0.405405 0.878378 0.324324 0.273973 0.054054 0.175676 0.256757 0.405405 0.918919 0.324324 0.364865 0.310811 0.232877 0.232877 0.219178 0.094595 0.297297 0.540541 0.743243 0.932432 0.027027 0.351351 0.608108 0.783784 1.000000 0.013514 0.108108 0.243243 0.486486 0.972973 0.351351 0.243243 0.405405 0.123288 0.232877 0.205479 0.013514 0.148649 0.351351 0.635135 1.000000 0.162162 0.391892 0.554054 0.716216 0.932432 0.027027 0.283784 0.567568 0.729730 0.972973 0.229730 0.459459 0.310811 0.246575 0.136986 0.315068 0.094595 0.297297 0.540541 0.702703 0.851351 0.027027 0.310811 0.608108 0.797297 1.000000 0.013514 0.108108 0.243243 0.486486 0.972973 0.054054 0.040541 0.135135 0.040541 0.040541 0.067568 0.040541 0.027027 0.054054 0.067568 0.054054 0.027027 0.054054 0.040541 0.013514 0.067568 0.040541 0.013514 0.108108 0.013514 
>YAR031w
0.322148 0.345638 0.332215 0.239057 0.178451 0.185185 0.013423 0.214765 0.583893 0.802013 0.993289 0.006711 0.234899 0.503356 0.788591 0.983221 0.003356 0.285235 0.456376 0.627517 1.000000 0.392617 0.067114 0.540268 0.016835 0.090909 0.010101 0.003356 0.238255 0.540268 0.781879 1.000000 0.016779 0.030201 0.473154 0.523490 0.708054 0.043624 0.315436 0.466443 0.731544 0.973154 0.557047 0.336700 0.016779 0.298658 0.466443 0.667785 0.996644 0.325503 0.342282 0.332215 0.188552 0.208754 0.208754 0.006711 0.261745 0.526846 0.795302 0.989933 0.013423 0.285235 0.469799 0.748322 0.993289 0.003356 0.167785 0.483221 0.704698 1.000000 0.392617 0.261745 0.345638 0.151515 0.232323 0.185185 0.003356 0.281879 0.453020 0.651007 1.000000 0.006711 0.268456 0.533557 0.815436 0.983221 0.013423 0.187919 0.563758 0.781879 0.993289 0.271812 0.395973 0.332215 0.195286 0.168350 0.249158 0.006711 0.251678 0.533557 0.798658 0.989933 0.010067 0.285235 0.476510 0.741611 0.993289 0.003356 0.167785 0.483221 0.704698 1.000000 0.043624 0.083893 0.073826 0.046980 0.036913 0.036913 0.033557 0.057047 0.080537 0.053691 0.036913 0.023490 0.060403 0.016779 0.053691 0.083893 0.057047 0.020134 0.083893 0.016779 
>YAR033w
0.316239 0.350427 0.333333 0.236052 0.180258 0.184549 0.008547 0.303419 0.572650 0.841880 1.000000 0.012821 0.209402 0.559829 0.756410 0.995726 0.004274 0.239316 0.380342 0.589744 0.982906 0.384615 0.017094 0.598291 0.008584 0.094421 0.000000 0.004274 0.111111 0.525641 0.743590 1.000000 0.628205 0.628205 0.632479 0.636752 0.641026 0.089744 0.269231 0.461538 0.773504 0.987179 0.517094 0.326180 0.042735 0.235043 0.371795 0.632479 0.982906 0.329060 0.410256 0.260684 0.266094 0.128755 0.201717 0.012821 0.213675 0.495726 0.756410 0.995726 0.008547 0.247863 0.448718 0.730769 1.000000 0.004274 0.286325 0.559829 0.688034 0.991453 0.388889 0.277778 0.333333 0.163090 0.227468 0.206009 0.004274 0.230769 0.388889 0.636752 0.982906 0.012821 0.213675 0.508547 0.764957 0.995726 0.008547 0.303419 0.576923 0.841880 1.000000 0.264957 0.474359 0.260684 0.274678 0.094421 0.236052 0.012821 0.235043 0.495726 0.756410 0.995726 0.008547 0.239316 0.448718 0.730769 1.000000 0.004274 0.286325 0.559829 0.688034 0.991453 0.059829 0.051282 0.068376 0.042735 0.029915 0.064103 0.029915 0.064103 0.068376 0.059829 0.055556 0.017094 0.055556 0.008547 0.064103 0.106838 0.076923 0.012821 0.047009 0.017094 
>YAR035w
0.314410 0.393013 0.292576 0.246356 0.199708 0.221574 0.004367 0.211063 0.477438 0.746725 0.992722 0.002911 0.251820 0.512373 0.755459 1.000000 0.001456 0.286754 0.500728 0.739447 0.997089 0.451237 0.138282 0.410480 0.055394 0.067055 0.002915 0.001456 0.244541 0.508006 0.751092 1.000000 0.138282 0.295488 0.496361 0.719068 0.997089 0.017467 0.195051 0.459971 0.755459 0.982533 0.592431 0.326531 0.005822 0.245997 0.503639 0.762737 0.997089 0.411936 0.340611 0.247453 0.249271 0.204082 0.176385 0.002911 0.259098 0.510917 0.754003 1.000000 0.004367 0.202329 0.471616 0.723435 0.997089 0.001456 0.244541 0.518195 0.774381 0.991266 0.331878 0.326055 0.342067 0.192420 0.240525 0.225948 0.001456 0.276565 0.500728 0.743814 0.997089 0.002911 0.253275 0.521106 0.755459 1.000000 0.004367 0.213974 0.477438 0.746725 0.992722 0.352256 0.400291 0.247453 0.241983 0.188047 0.192420 0.020378 0.278020 0.529840 0.754003 1.000000 0.002911 0.202329 0.458515 0.723435 0.997089 0.001456 0.244541 0.518195 0.774381 0.991266 0.066958 0.037846 0.042213 0.069869 0.052402 0.045124 0.048035 0.077147 0.081514 0.075691 0.043668 0.027656 0.039301 0.016012 0.056769 0.097525 0.046579 0.013100 0.048035 0.014556 
>YAR042w
0.389731 0.346801 0.263468 0.247683 0.198821 0.187026 0.001684 0.265993 0.503367 0.708754 0.998316 0.003367 0.278620 0.502525 0.773569 0.997475 0.000842 0.182660 0.484007 0.737374 1.000000 0.544613 0.140572 0.314815 0.048863 0.055602 0.001685 0.000842 0.284512 0.488215 0.735690 1.000000 0.008418 0.301347 0.791246 0.852694 0.983165 0.011785 0.145623 0.467172 0.550505 0.990741 0.437710 0.360573 0.005051 0.223906 0.510101 0.767677 0.999158 0.375421 0.379630 0.244949 0.282224 0.176074 0.189553 0.003367 0.278620 0.497475 0.750000 0.998316 0.001684 0.215488 0.481481 0.691919 0.999158 0.000842 0.250842 0.532828 0.808081 1.000000 0.292929 0.287879 0.419192 0.171019 0.241786 0.229992 0.000842 0.202020 0.492424 0.753367 1.000000 0.003367 0.279461 0.521044 0.764310 0.997475 0.001684 0.259259 0.491582 0.714646 0.998316 0.324916 0.430135 0.244949 0.279697 0.144903 0.220725 0.004209 0.281145 0.494949 0.741582 0.998316 0.001684 0.215488 0.482323 0.702862 0.999158 0.000842 0.250842 0.532828 0.808081 1.000000 0.043771 0.075758 0.074916 0.080808 0.039562 0.074916 0.045455 0.059764 0.079966 0.058923 0.043771 0.029461 0.029461 0.006734 0.049663 0.093434 0.047138 0.018519 0.030303 0.017677 
>YAR047c
0.245283 0.254717 0.500000 0.152381 0.257143 0.266667 0.028302 0.405660 0.584906 0.773585 1.000000 0.018868 0.103774 0.358491 0.754717 0.990566 0.009434 0.226415 0.462264 0.707547 0.971698 0.169811 0.047170 0.783019 0.019048 0.057143 0.019048 0.009434 0.037736 0.226415 0.773585 1.000000 0.764151 0.764151 0.943396 0.952830 0.971698 0.075472 0.301887 0.500000 0.698113 0.933962 0.726415 0.323810 0.047170 0.254717 0.481132 0.726415 0.971698 0.226415 0.396226 0.377358 0.228571 0.114286 0.266667 0.037736 0.207547 0.396226 0.801887 0.990566 0.028302 0.226415 0.471698 0.650943 0.971698 0.009434 0.264151 0.566038 0.735849 1.000000 0.575472 0.169811 0.254717 0.190476 0.295238 0.114286 0.009434 0.226415 0.462264 0.716981 0.971698 0.037736 0.075472 0.358491 0.669811 0.990566 0.028302 0.283019 0.575472 0.773585 1.000000 0.160377 0.462264 0.377358 0.209524 0.057143 0.323810 0.037736 0.301887 0.500000 0.811321 0.990566 0.028302 0.207547 0.424528 0.632075 0.971698 0.009434 0.264151 0.566038 0.735849 1.000000 0.028302 0.084906 0.018868 0.018868 0.066038 0.028302 0.000000 0.037736 0.075472 0.028302 0.028302 0.009434 0.075472 0.037736 0.056604 0.141509 0.084906 0.028302 0.141509 0.009434 
>YAR050w
0.166558 0.599219 0.234223 0.211589 0.060547 0.270182 0.003904 0.227066 0.467144 0.724789 0.986988 0.001301 0.266753 0.513988 0.757970 0.998699 0.000651 0.220560 0.484060 0.731295 1.000000 0.918673 0.048146 0.033182 0.018229 0.005208 0.000000 0.000651 0.299935 0.529603 0.759271 1.000000 0.026025 0.088484 0.122967 0.147040 0.982433 0.001952 0.009109 0.017567 0.113858 0.999349 0.176318 0.153646 0.001952 0.069616 0.137931 0.403383 0.998048 0.615485 0.275211 0.109304 0.348307 0.139974 0.052083 0.001301 0.269356 0.509434 0.753416 0.998699 0.006506 0.260247 0.523748 0.770332 1.000000 0.000651 0.122316 0.359792 0.655172 0.994144 0.253090 0.577098 0.169811 0.280599 0.067057 0.208984 0.000651 0.176318 0.460638 0.728042 1.000000 0.001301 0.281718 0.519844 0.757970 0.998699 0.003253 0.227066 0.475602 0.752765 0.986988 0.546519 0.344177 0.109304 0.361328 0.117839 0.074219 0.001301 0.277814 0.515940 0.759271 0.998699 0.002602 0.251789 0.505530 0.752765 1.000000 0.000651 0.122316 0.359792 0.655172 0.994144 0.016265 0.012362 0.055303 0.027977 0.021470 0.033182 0.061158 0.046194 0.130124 0.281067 0.058556 0.003253 0.018868 0.010410 0.068315 0.034483 0.062459 0.018868 0.023422 0.016265 
>YAR053w
0.193878 0.336735 0.469388 0.134021 0.195876 0.360825 0.030612 0.112245 0.448980 0.653061 0.989796 0.020408 0.224490 0.367347 0.714286 0.979592 0.010204 0.295918 0.540816 0.765306 1.000000 0.316327 0.255102 0.428571 0.082474 0.061856 0.000000 0.010204 0.224490 0.397959 0.775510 1.000000 0.428571 0.489796 0.826531 0.908163 0.979592 0.030612 0.122449 0.306122 0.642857 0.755102 0.734694 0.309278 0.040816 0.285714 0.520408 0.724490 0.959184 0.326531 0.428571 0.244898 0.257732 0.134021 0.247423 0.081633 0.244898 0.418367 0.714286 0.979592 0.030612 0.204082 0.520408 0.734694 1.000000 0.010204 0.142857 0.500000 0.744898 0.948980 0.520408 0.275510 0.204082 0.309278 0.247423 0.103093 0.010204 0.275510 0.540816 0.755102 1.000000 0.081633 0.224490 0.357143 0.714286 0.979592 0.030612 0.193878 0.500000 0.653061 0.989796 0.244898 0.510204 0.244898 0.298969 0.113402 0.268041 0.081633 0.244898 0.367347 0.714286 0.979592 0.030612 0.234694 0.530612 0.734694 1.000000 0.010204 0.142857 0.500000 0.744898 0.948980 0.040816 0.040816 0.051020 0.000000 0.010204 0.051020 0.010204 0.061224 0.112245 0.061224 0.030612 0.010204 0.051020 0.051020 0.081633 0.122449 0.112245 0.020408 0.081633 0.000000 
>YAR060c
0.387387 0.297297 0.315315 0.254545 0.263636 0.218182 0.027027 0.216216 0.441441 0.648649 1.000000 0.018018 0.342342 0.558559 0.774775 0.981982 0.009009 0.252252 0.414414 0.783784 0.990991 0.477477 0.189189 0.333333 0.072727 0.109091 0.036364 0.009009 0.342342 0.567568 0.774775 1.000000 0.351351 0.387387 0.594595 0.864865 0.945946 0.090090 0.171171 0.261261 0.495495 0.846847 0.450450 0.472727 0.108108 0.252252 0.504505 0.747748 0.990991 0.342342 0.324324 0.333333 0.200000 0.254545 0.218182 0.018018 0.342342 0.585586 0.792793 0.990991 0.054054 0.198198 0.369369 0.747748 0.954955 0.009009 0.252252 0.441441 0.648649 1.000000 0.333333 0.279279 0.387387 0.190909 0.272727 0.245455 0.009009 0.261261 0.450450 0.747748 0.990991 0.018018 0.153153 0.558559 0.792793 0.981982 0.027027 0.216216 0.441441 0.648649 1.000000 0.297297 0.369369 0.333333 0.227273 0.227273 0.245455 0.018018 0.153153 0.558559 0.774775 0.981982 0.054054 0.216216 0.450450 0.756757 0.990991 0.009009 0.252252 0.441441 0.648649 1.000000 0.135135 0.108108 0.036036 0.036036 0.036036 0.036036 0.045045 0.027027 0.153153 0.036036 0.018018 0.000000 0.018018 0.027027 0.063063 0.099099 0.054054 0.018018 0.045045 0.009009 
>YAR061w
0.179104 0.537313 0.283582 0.166667 0.121212 0.257576 0.268657 0.492537 0.567164 0.716418 1.000000 0.029851 0.238806 0.477612 0.791045 0.955224 0.014925 0.119403 0.298507 0.582090 0.985075 0.477612 0.119403 0.402985 0.030303 0.090909 0.000000 0.014925 0.432836 0.552239 0.791045 1.000000 0.567164 0.582090 0.611940 0.641791 0.671642 0.044776 0.119403 0.223881 0.373134 0.895522 0.626866 0.272727 0.059701 0.194030 0.358209 0.656716 0.940299 0.417910 0.283582 0.298507 0.242424 0.212121 0.166667 0.029851 0.313433 0.462687 0.761194 0.955224 0.089552 0.208955 0.417910 0.597015 1.000000 0.014925 0.104478 0.552239 0.776119 0.985075 0.417910 0.388060 0.194030 0.333333 0.196970 0.121212 0.014925 0.149254 0.417910 0.686567 0.985075 0.029851 0.253731 0.462687 0.761194 0.955224 0.059701 0.373134 0.522388 0.641791 1.000000 0.343284 0.358209 0.298507 0.212121 0.151515 0.227273 0.134328 0.253731 0.462687 0.761194 0.955224 0.029851 0.268657 0.432836 0.597015 1.000000 0.014925 0.104478 0.552239 0.776119 0.985075 0.014925 0.029851 0.000000 0.014925 0.029851 0.089552 0.059701 0.059701 0.119403 0.089552 0.059701 0.014925 0.134328 0.014925 0.059701 0.104478 0.000000 0.044776 0.044776 0.014925 
>YAR062w
0.196970 0.545455 0.257576 0.182741 0.121827 0.309645 0.045455 0.202020 0.489899 0.646465 0.964646 0.010101 0.297980 0.555556 0.792929 1.000000 0.005051 0.181818 0.414141 0.636364 0.989899 0.621212 0.353535 0.025253 0.111675 0.010152 0.000000 0.005051 0.272727 0.595960 0.813131 1.000000 0.060606 0.252525 0.419192 0.575758 0.878788 0.166667 0.166667 0.171717 0.176768 0.186869 0.535354 0.416244 0.015152 0.186869 0.419192 0.681818 0.989899 0.565657 0.277778 0.156566 0.335025 0.157360 0.071066 0.010101 0.267677 0.575758 0.792929 1.000000 0.030303 0.222222 0.464646 0.717172 0.989899 0.005051 0.085859 0.363636 0.560606 0.878788 0.308081 0.489899 0.202020 0.319797 0.121827 0.182741 0.005051 0.186869 0.398990 0.580808 0.989899 0.010101 0.282828 0.606061 0.808081 1.000000 0.045455 0.207071 0.505051 0.661616 0.964646 0.484848 0.358586 0.156566 0.319797 0.142132 0.086294 0.010101 0.303030 0.595960 0.808081 1.000000 0.030303 0.212121 0.439394 0.686869 0.989899 0.005051 0.085859 0.363636 0.560606 0.878788 0.005051 0.025253 0.040404 0.060606 0.035354 0.030303 0.070707 0.045455 0.141414 0.166667 0.065657 0.005051 0.050505 0.015152 0.070707 0.045455 0.055556 0.015152 0.040404 0.015152 
>YAR064w
0.252525 0.424242 0.323232 0.204082 0.102041 0.244898 0.040404 0.343434 0.454545 0.656566 0.989899 0.080808 0.212121 0.464646 0.646465 0.979798 0.010101 0.222222 0.636364 0.868687 1.000000 0.737374 0.060606 0.202020 0.020408 0.081633 0.000000 0.010101 0.232323 0.474747 0.656566 1.000000 0.252525 0.252525 0.272727 0.282828 0.303030 0.050505 0.101010 0.848485 0.898990 0.949495 0.434343 0.285714 0.030303 0.121212 0.434343 0.838384 0.949495 0.454545 0.252525 0.292929 0.244898 0.265306 0.153061 0.040404 0.212121 0.464646 0.646465 0.979798 0.020202 0.303030 0.454545 0.757576 1.000000 0.010101 0.222222 0.545455 0.818182 0.989899 0.343434 0.363636 0.292929 0.224490 0.122449 0.244898 0.010101 0.101010 0.636364 0.858586 1.000000 0.080808 0.232323 0.464646 0.646465 0.979798 0.040404 0.333333 0.454545 0.656566 0.989899 0.323232 0.383838 0.292929 0.244898 0.183673 0.234694 0.040404 0.212121 0.444444 0.646465 0.959596 0.020202 0.303030 0.474747 0.777778 1.000000 0.010101 0.222222 0.545455 0.818182 0.989899 0.070707 0.050505 0.070707 0.020202 0.010101 0.030303 0.070707 0.050505 0.111111 0.070707 0.060606 0.040404 0.020202 0.070707 0.020202 0.080808 0.040404 0.020202 0.080808 0.010101 
>YAR066w
0.201970 0.541872 0.256158 0.217822 0.128713 0.297030 0.014778 0.256158 0.517241 0.679803 0.965517 0.049261 0.236453 0.477833 0.753695 0.995074 0.004926 0.266010 0.497537 0.743842 1.000000 0.581281 0.325123 0.093596 0.158416 0.019802 0.000000 0.004926 0.231527 0.512315 0.778325 1.000000 0.187192 0.403941 0.532020 0.724138 0.931034 0.019704 0.034483 0.059113 0.083744 0.960591 0.497537 0.415842 0.024631 0.315271 0.502463 0.748768 0.985222 0.556650 0.290640 0.152709 0.351485 0.143564 0.099010 0.049261 0.236453 0.443350 0.738916 0.995074 0.014778 0.300493 0.497537 0.704433 1.000000 0.004926 0.093596 0.527094 0.758621 0.926108 0.285714 0.507389 0.206897 0.301980 0.143564 0.212871 0.004926 0.266010 0.497537 0.743842 1.000000 0.049261 0.231527 0.443350 0.763547 0.995074 0.014778 0.256158 0.527094 0.679803 0.965517 0.541872 0.305419 0.152709 0.366337 0.138614 0.103960 0.049261 0.231527 0.443350 0.733990 0.995074 0.014778 0.310345 0.522167 0.724138 1.000000 0.004926 0.093596 0.527094 0.758621 0.926108 0.009852 0.049261 0.054187 0.049261 0.004926 0.034483 0.093596 0.108374 0.206897 0.083744 0.014778 0.004926 0.029557 0.000000 0.078818 0.088670 0.029557 0.004926 0.054187 0.000000 
>YAR068w
0.173913 0.416149 0.409938 0.143750 0.131250 0.343750 0.018634 0.254658 0.521739 0.714286 0.968944 0.012422 0.211180 0.434783 0.701863 0.962733 0.006211 0.285714 0.534161 0.838509 1.000000 0.577640 0.099379 0.322981 0.043750 0.081250 0.018750 0.006211 0.167702 0.366460 0.726708 1.000000 0.099379 0.118012 0.925466 0.950311 0.993789 0.254658 0.416149 0.515528 0.633540 0.888199 0.540373 0.425000 0.024845 0.360248 0.552795 0.819876 0.981366 0.372671 0.447205 0.180124 0.312500 0.162500 0.118750 0.012422 0.217391 0.447205 0.701863 0.962733 0.018634 0.310559 0.552795 0.813665 1.000000 0.006211 0.186335 0.385093 0.714286 0.981366 0.409938 0.366460 0.223602 0.325000 0.150000 0.162500 0.006211 0.285714 0.534161 0.838509 1.000000 0.012422 0.211180 0.447205 0.701863 0.962733 0.018634 0.229814 0.490683 0.714286 0.968944 0.217391 0.602484 0.180124 0.262500 0.100000 0.181250 0.037267 0.223602 0.447205 0.683230 0.944099 0.012422 0.291925 0.527950 0.763975 1.000000 0.006211 0.186335 0.385093 0.714286 0.981366 0.018634 0.037267 0.000000 0.006211 0.086957 0.024845 0.000000 0.043478 0.062112 0.105590 0.155280 0.049689 0.000000 0.000000 0.074534 0.254658 0.006211 0.018634 0.037267 0.018634 
>YAR069c
0.175258 0.298969 0.525773 0.135417 0.156250 0.343750 0.020619 0.175258 0.494845 0.639175 0.845361 0.041237 0.206186 0.484536 0.659794 0.948454 0.010309 0.257732 0.463918 0.793814 1.000000 0.360825 0.329897 0.309278 0.052083 0.052083 0.052083 0.010309 0.175258 0.546392 0.639175 1.000000 0.051546 0.123711 0.257732 0.474227 0.989691 0.268041 0.329897 0.762887 0.845361 0.969072 0.690722 0.291667 0.041237 0.247423 0.443299 0.762887 0.969072 0.309278 0.463918 0.226804 0.343750 0.177083 0.208333 0.030928 0.226804 0.567010 0.742268 0.948454 0.020619 0.257732 0.443299 0.773196 1.000000 0.010309 0.195876 0.484536 0.608247 0.979381 0.546392 0.237113 0.216495 0.302083 0.197917 0.114583 0.010309 0.278351 0.474227 0.793814 1.000000 0.051546 0.185567 0.536082 0.690722 0.948454 0.020619 0.175258 0.412371 0.628866 0.845361 0.257732 0.515464 0.226804 0.312500 0.145833 0.239583 0.030928 0.226804 0.546392 0.721649 0.948454 0.020619 0.257732 0.463918 0.793814 1.000000 0.010309 0.195876 0.484536 0.608247 0.979381 0.010309 0.030928 0.041237 0.041237 0.010309 0.041237 0.041237 0.030928 0.103093 0.041237 0.020619 0.041237 0.020619 0.030928 0.123711 0.134021 0.113402 0.030928 0.072165 0.020619 
>YAR070c
0.272727 0.262626 0.464646 0.061224 0.306122 0.285714 0.030303 0.252525 0.444444 0.696970 0.989899 0.020202 0.141414 0.575758 0.787879 0.979798 0.010101 0.242424 0.474747 0.747475 1.000000 0.292929 0.171717 0.535354 0.081633 0.102041 0.020408 0.010101 0.252525 0.575758 0.838384 1.000000 0.030303 0.060606 0.757576 0.808081 0.959596 0.090909 0.272727 0.404040 0.626263 0.898990 0.676768 0.367347 0.040404 0.202020 0.474747 0.767677 0.969697 0.303030 0.393939 0.303030 0.255102 0.173469 0.306122 0.050505 0.252525 0.545455 0.757576 0.979798 0.040404 0.242424 0.464646 0.727273 1.000000 0.010101 0.141414 0.404040 0.707071 0.989899 0.505051 0.202020 0.292929 0.224490 0.326531 0.081633 0.010101 0.191919 0.464646 0.747475 1.000000 0.050505 0.202020 0.616162 0.787879 0.979798 0.030303 0.313131 0.454545 0.696970 0.989899 0.222222 0.474747 0.303030 0.244898 0.122449 0.357143 0.050505 0.202020 0.484848 0.686869 0.969697 0.040404 0.292929 0.515152 0.747475 1.000000 0.010101 0.141414 0.404040 0.707071 0.989899 0.050505 0.060606 0.010101 0.040404 0.060606 0.050505 0.050505 0.030303 0.040404 0.060606 0.020202 0.020202 0.040404 0.060606 0.060606 0.121212 0.090909 0.030303 0.080808 0.020202 
>YAR071w
0.314775 0.394004 0.291221 0.242489 0.197425 0.229614 0.006424 0.286938 0.520343 0.755889 1.000000 0.008565 0.209850 0.451820 0.725910 0.991435 0.002141 0.246253 0.533191 0.764454 0.995717 0.535332 0.102784 0.361884 0.036481 0.075107 0.002146 0.002141 0.226981 0.449679 0.773019 1.000000 0.077088 0.156317 0.713062 0.845824 0.972163 0.006424 0.314775 0.511777 0.638116 0.993576 0.567452 0.394850 0.004283 0.261242 0.509636 0.725910 0.993576 0.406852 0.338330 0.254818 0.293991 0.203863 0.167382 0.008565 0.222698 0.468951 0.728051 0.991435 0.004283 0.269807 0.526767 0.749465 1.000000 0.002141 0.241970 0.498929 0.773019 0.997859 0.351178 0.314775 0.334047 0.240343 0.246781 0.197425 0.002141 0.241970 0.533191 0.764454 0.995717 0.008565 0.192719 0.438972 0.715203 0.991435 0.006424 0.304069 0.520343 0.758030 1.000000 0.359743 0.385439 0.254818 0.289700 0.182403 0.188841 0.008565 0.229122 0.468951 0.723769 0.991435 0.004283 0.265525 0.526767 0.762313 1.000000 0.002141 0.241970 0.498929 0.773019 0.997859 0.032120 0.055675 0.051392 0.072805 0.032120 0.070664 0.062099 0.062099 0.083512 0.079229 0.027837 0.019272 0.059957 0.019272 0.059957 0.074946 0.049251 0.017131 0.055675 0.014989 
>YAR073w
0.302730 0.364764 0.332506 0.238806 0.181592 0.258706 0.012407 0.270471 0.498759 0.697270 1.000000 0.004963 0.233251 0.481390 0.796526 0.997519 0.002481 0.228288 0.513648 0.739454 0.995037 0.429280 0.267990 0.302730 0.106965 0.067164 0.002488 0.002481 0.176179 0.439206 0.672457 1.000000 0.104218 0.374690 0.620347 0.846154 0.995037 0.014888 0.260546 0.498759 0.722084 0.893300 0.645161 0.353234 0.009926 0.258065 0.563275 0.816377 0.995037 0.397022 0.364764 0.238213 0.300995 0.191542 0.166667 0.004963 0.223325 0.473945 0.769231 0.997519 0.009926 0.243176 0.488834 0.707196 0.995037 0.002481 0.280397 0.555831 0.846154 1.000000 0.367246 0.322581 0.310174 0.248756 0.216418 0.203980 0.002481 0.240695 0.531017 0.786600 0.995037 0.004963 0.215881 0.473945 0.759305 0.997519 0.012407 0.265509 0.493797 0.697270 1.000000 0.347395 0.414392 0.238213 0.281095 0.166667 0.191542 0.004963 0.223325 0.476427 0.756824 0.997519 0.009926 0.243176 0.483871 0.717122 0.995037 0.002481 0.280397 0.555831 0.846154 1.000000 0.042184 0.066998 0.042184 0.059553 0.039702 0.052109 0.086849 0.071960 0.064516 0.064516 0.034739 0.007444 0.034739 0.014888 0.071960 0.091811 0.066998 0.037221 0.037221 0.012407 
>YBL001c
0.298077 0.375000 0.326923 0.213592 0.203883 0.213592 0.028846 0.307692 0.625000 0.836538 1.000000 0.019231 0.221154 0.451923 0.682692 0.990385 0.009615 0.115385 0.365385 0.605769 0.980769 0.375000 0.211538 0.413462 0.077670 0.058252 0.000000 0.009615 0.192308 0.432692 0.788462 1.000000 0.038462 0.076923 0.134615 0.721154 0.778846 0.211538 0.298077 0.567308 0.875000 0.980769 0.548077 0.368932 0.038462 0.163462 0.432692 0.644231 0.980769 0.413462 0.336538 0.250000 0.281553 0.184466 0.252427 0.019231 0.182692 0.432692 0.682692 0.990385 0.038462 0.269231 0.538462 0.759615 1.000000 0.009615 0.298077 0.615385 0.730769 0.971154 0.346154 0.307692 0.346154 0.194175 0.242718 0.194175 0.009615 0.125000 0.403846 0.692308 0.980769 0.019231 0.201923 0.432692 0.644231 0.990385 0.028846 0.336538 0.653846 0.836538 1.000000 0.355769 0.394231 0.250000 0.252427 0.135922 0.300971 0.076923 0.221154 0.451923 0.740385 0.990385 0.019231 0.211538 0.471154 0.701923 1.000000 0.009615 0.298077 0.615385 0.730769 0.971154 0.038462 0.086538 0.057692 0.086538 0.028846 0.000000 0.076923 0.048077 0.067308 0.076923 0.038462 0.048077 0.019231 0.019231 0.086538 0.057692 0.105769 0.028846 0.019231 0.009615 
>YBL002w
0.328244 0.480916 0.190840 0.292308 0.123077 0.161538 0.045802 0.221374 0.419847 0.679389 0.992366 0.015267 0.190840 0.450382 0.770992 1.000000 0.007634 0.374046 0.534351 0.748092 0.931298 0.442748 0.030534 0.526718 0.030769 0.061538 0.000000 0.007634 0.106870 0.221374 0.412214 1.000000 0.435115 0.435115 0.442748 0.702290 0.709924 0.320611 0.496183 0.625954 0.824427 0.961832 0.381679 0.292308 0.305344 0.442748 0.587786 0.763359 0.954198 0.450382 0.274809 0.274809 0.246154 0.223077 0.169231 0.015267 0.183206 0.450382 0.763359 1.000000 0.045802 0.389313 0.572519 0.778626 0.992366 0.007634 0.236641 0.358779 0.664122 0.954198 0.229008 0.427481 0.343511 0.184615 0.146154 0.284615 0.007634 0.351145 0.534351 0.748092 0.954198 0.015267 0.183206 0.473282 0.770992 1.000000 0.045802 0.236641 0.419847 0.679389 0.992366 0.412214 0.312977 0.274809 0.284615 0.200000 0.192308 0.015267 0.198473 0.488550 0.763359 1.000000 0.045802 0.366412 0.541985 0.755725 0.992366 0.007634 0.236641 0.358779 0.664122 0.954198 0.045802 0.145038 0.061069 0.022901 0.030534 0.022901 0.030534 0.129771 0.145038 0.083969 0.038168 0.015267 0.038168 0.000000 0.053435 0.045802 0.061069 0.015267 0.015267 0.000000 
>YBL003c
0.325758 0.431818 0.242424 0.297710 0.145038 0.221374 0.037879 0.287879 0.575758 0.734848 0.992424 0.015152 0.151515 0.371212 0.636364 0.977273 0.007576 0.340909 0.507576 0.750000 1.000000 0.477273 0.053030 0.469697 0.045802 0.106870 0.000000 0.007576 0.113636 0.568182 0.848485 1.000000 0.333333 0.333333 0.598485 0.772727 0.787879 0.143939 0.287879 0.477273 0.643939 0.977273 0.507576 0.198473 0.151515 0.340909 0.469697 0.666667 0.893939 0.409091 0.371212 0.219697 0.267176 0.206107 0.152672 0.015152 0.136364 0.378788 0.696970 0.977273 0.128788 0.424242 0.613636 0.772727 1.000000 0.007576 0.204545 0.333333 0.628788 0.962121 0.265152 0.386364 0.348485 0.183206 0.183206 0.259542 0.007576 0.310606 0.484848 0.742424 1.000000 0.015152 0.121212 0.363636 0.666667 0.977273 0.037879 0.287879 0.583333 0.734848 0.992424 0.371212 0.409091 0.219697 0.229008 0.183206 0.175573 0.015152 0.121212 0.363636 0.666667 0.977273 0.128788 0.401515 0.621212 0.787879 1.000000 0.007576 0.204545 0.333333 0.628788 0.962121 0.075758 0.083333 0.037879 0.022727 0.045455 0.060606 0.106061 0.143939 0.060606 0.037879 0.037879 0.022727 0.022727 0.000000 0.045455 0.128788 0.053030 0.007576 0.007576 0.000000 
>YBL004w
0.334537 0.309667 0.355796 0.206260 0.232745 0.227528 0.001203 0.251504 0.513839 0.755716 0.999599 0.000802 0.267950 0.504212 0.755315 1.000000 0.000401 0.236262 0.484557 0.740072 0.988367 0.259126 0.025271 0.715604 0.011236 0.093098 0.007223 0.000401 0.288809 0.469715 0.734456 1.000000 0.005616 0.179703 0.328119 0.390694 0.874047 0.007621 0.241476 0.530686 0.770959 0.999198 0.545929 0.386035 0.005616 0.243482 0.487766 0.728039 0.995989 0.314079 0.423987 0.261933 0.276886 0.162520 0.235152 0.000802 0.256318 0.486562 0.754513 1.000000 0.001604 0.251905 0.507020 0.746891 0.997994 0.000401 0.231448 0.494585 0.750100 0.999599 0.392700 0.250702 0.356598 0.209872 0.274478 0.174157 0.000401 0.239069 0.484557 0.740473 0.996390 0.000802 0.262335 0.491777 0.754513 1.000000 0.001203 0.254312 0.518652 0.755315 0.999599 0.278379 0.459687 0.261933 0.261236 0.146870 0.250803 0.000802 0.260730 0.491777 0.756117 1.000000 0.001604 0.251103 0.503410 0.746089 0.997994 0.000401 0.231448 0.494585 0.750100 0.999599 0.048536 0.071801 0.069394 0.055756 0.033694 0.055355 0.028480 0.046129 0.093061 0.054954 0.028079 0.022062 0.036903 0.007621 0.056959 0.132772 0.075812 0.020858 0.052948 0.008825 
>YBL005w
0.327869 0.344262 0.327869 0.198974 0.229744 0.215385 0.002049 0.230533 0.524590 0.771516 0.993852 0.006148 0.228484 0.447746 0.763320 0.997951 0.001025 0.283811 0.506148 0.727459 1.000000 0.428279 0.053279 0.518443 0.031795 0.099487 0.007179 0.001025 0.189549 0.514344 0.837090 1.000000 0.022541 0.062500 0.552254 0.681352 0.968238 0.010246 0.294057 0.497951 0.712090 0.990779 0.517418 0.369231 0.003074 0.302254 0.506148 0.729508 0.996926 0.349385 0.395492 0.255123 0.259487 0.150769 0.201026 0.006148 0.203893 0.447746 0.755123 0.997951 0.003074 0.279713 0.517418 0.748975 1.000000 0.001025 0.263320 0.510246 0.738730 0.998975 0.373975 0.276639 0.349385 0.196923 0.278974 0.160000 0.001025 0.282787 0.503074 0.731557 1.000000 0.006148 0.220287 0.438525 0.755123 0.997951 0.002049 0.230533 0.522541 0.764344 0.993852 0.287910 0.456967 0.255123 0.266667 0.125128 0.226667 0.006148 0.231557 0.479508 0.779713 0.995902 0.003074 0.251025 0.489754 0.734631 1.000000 0.001025 0.263320 0.510246 0.738730 0.998975 0.039959 0.064549 0.061475 0.053279 0.046107 0.062500 0.023566 0.045082 0.100410 0.065574 0.042008 0.021516 0.046107 0.019467 0.042008 0.110656 0.072746 0.017418 0.056352 0.009221 
>YBL005w-a
0.320455 0.452273 0.227273 0.273349 0.159453 0.189066 0.004545 0.293182 0.577273 0.804545 0.990909 0.006818 0.218182 0.400000 0.743182 1.000000 0.002273 0.311364 0.513636 0.690909 0.988636 0.688636 0.034091 0.277273 0.022779 0.050114 0.000000 0.002273 0.190909 0.363636 0.752273 1.000000 0.040909 0.045455 0.865909 0.875000 0.970455 0.009091 0.515909 0.615909 0.729545 0.909091 0.395455 0.341686 0.013636 0.261364 0.490909 0.665909 0.988636 0.438636 0.334091 0.227273 0.293850 0.184510 0.166287 0.006818 0.225000 0.459091 0.738636 0.997727 0.004545 0.220455 0.500000 0.700000 0.988636 0.002273 0.302273 0.556818 0.786364 1.000000 0.263636 0.379545 0.356818 0.186788 0.205011 0.259681 0.002273 0.295455 0.513636 0.704545 1.000000 0.006818 0.195455 0.393182 0.725000 0.997727 0.004545 0.263636 0.568182 0.800000 0.990909 0.334091 0.438636 0.227273 0.298405 0.138952 0.211845 0.006818 0.227273 0.488636 0.768182 0.997727 0.004545 0.215909 0.454545 0.693182 0.993182 0.002273 0.302273 0.556818 0.786364 1.000000 0.038636 0.047727 0.038636 0.047727 0.075000 0.072727 0.034091 0.054545 0.109091 0.088636 0.093182 0.036364 0.036364 0.011364 0.038636 0.059091 0.050000 0.029545 0.031818 0.006818 
>YBL005w-b
0.336182 0.401140 0.262678 0.269669 0.186431 0.208666 0.001140 0.257550 0.533903 0.752707 0.998291 0.001709 0.223932 0.466097 0.693447 1.000000 0.000570 0.284330 0.506553 0.802279 0.999430 0.609117 0.147009 0.243875 0.059863 0.046180 0.002851 0.000570 0.226211 0.508832 0.667236 1.000000 0.010256 0.316809 0.500855 0.776068 0.984046 0.002279 0.194302 0.459829 0.852422 0.998860 0.464957 0.363740 0.003419 0.291738 0.491168 0.805128 0.998860 0.392023 0.359544 0.248433 0.286203 0.185861 0.177879 0.001709 0.225071 0.468946 0.680912 0.997151 0.001140 0.260969 0.519088 0.783476 0.999430 0.000570 0.287179 0.519658 0.780627 1.000000 0.304843 0.323077 0.372080 0.193273 0.239453 0.243444 0.000570 0.288319 0.510541 0.800570 0.999430 0.001709 0.214815 0.462678 0.668376 0.997151 0.001140 0.255840 0.526496 0.745869 1.000000 0.319658 0.431909 0.248433 0.274800 0.155074 0.208666 0.001709 0.238746 0.473504 0.694017 0.997151 0.001140 0.243305 0.504274 0.766382 0.999430 0.000570 0.287179 0.519658 0.780627 1.000000 0.042735 0.071225 0.050142 0.059259 0.046154 0.066667 0.037607 0.045584 0.101425 0.075783 0.062678 0.035897 0.042165 0.009687 0.041595 0.083191 0.071795 0.018803 0.029630 0.007977 
>YBL006c
0.311111 0.422222 0.266667 0.251397 0.189944 0.217877 0.027778 0.272222 0.533333 0.827778 1.000000 0.011111 0.222222 0.450000 0.677778 0.983333 0.005556 0.250000 0.538889 0.744444 0.994444 0.494444 0.155556 0.350000 0.055866 0.089385 0.033520 0.005556 0.266667 0.516667 0.750000 1.000000 0.133333 0.333333 0.388889 0.694444 0.877778 0.044444 0.166667 0.527778 0.688889 0.977778 0.444444 0.368715 0.033333 0.194444 0.466667 0.677778 0.988889 0.394444 0.350000 0.255556 0.301676 0.229050 0.122905 0.011111 0.222222 0.427778 0.711111 1.000000 0.027778 0.200000 0.461111 0.727778 0.994444 0.005556 0.316667 0.600000 0.833333 0.977778 0.294444 0.338889 0.366667 0.201117 0.229050 0.268156 0.005556 0.188889 0.488889 0.700000 0.994444 0.011111 0.211111 0.411111 0.672222 0.983333 0.027778 0.277778 0.577778 0.816667 1.000000 0.350000 0.394444 0.255556 0.279330 0.184358 0.167598 0.011111 0.194444 0.411111 0.672222 1.000000 0.027778 0.250000 0.511111 0.750000 0.994444 0.005556 0.316667 0.600000 0.833333 0.977778 0.061111 0.066667 0.066667 0.033333 0.066667 0.016667 0.072222 0.088889 0.127778 0.027778 0.022222 0.055556 0.027778 0.022222 0.077778 0.094444 0.027778 0.011111 0.033333 0.000000 
>YBL007c
0.341640 0.418810 0.239550 0.253419 0.158488 0.193886 0.007235 0.222669 0.446945 0.648714 0.996785 0.001608 0.259646 0.565916 0.772508 0.999196 0.000804 0.265273 0.539389 0.762862 1.000000 0.752412 0.133441 0.114148 0.051488 0.032180 0.001609 0.000804 0.285370 0.620579 0.811897 1.000000 0.001608 0.063505 0.237942 0.331190 0.619775 0.049839 0.356109 0.463023 0.491158 0.680868 0.387460 0.336283 0.001608 0.203376 0.435691 0.805466 0.998392 0.447749 0.337621 0.214630 0.290426 0.174578 0.144006 0.001608 0.268489 0.545820 0.762058 0.999196 0.002412 0.237138 0.511254 0.765273 0.996785 0.000804 0.243569 0.419614 0.653537 1.000000 0.258039 0.390675 0.351286 0.186645 0.181818 0.231698 0.000804 0.245177 0.509646 0.745177 1.000000 0.001608 0.295820 0.602090 0.790997 0.999196 0.007235 0.221865 0.434887 0.643891 0.996785 0.372990 0.412379 0.214630 0.259051 0.154465 0.164119 0.001608 0.272508 0.536174 0.766881 0.999196 0.002412 0.237138 0.521704 0.762862 0.997588 0.000804 0.243569 0.419614 0.653537 1.000000 0.039389 0.061897 0.059486 0.053055 0.066720 0.061093 0.077974 0.073151 0.083601 0.085209 0.070740 0.009646 0.018489 0.004019 0.048232 0.064309 0.037781 0.036977 0.039389 0.008842 
>YBL008w
0.335714 0.350000 0.314286 0.228844 0.194279 0.235995 0.002381 0.266667 0.507143 0.730952 1.000000 0.008333 0.248810 0.480952 0.705952 0.998810 0.001190 0.222619 0.503571 0.805952 0.997619 0.558333 0.411905 0.029762 0.156138 0.017878 0.005959 0.001190 0.265476 0.542857 0.741667 1.000000 0.003571 0.229762 0.441667 0.655952 0.995238 0.008333 0.742857 0.788095 0.813095 0.996429 0.578571 0.376639 0.003571 0.253571 0.492857 0.760714 0.997619 0.400000 0.367857 0.232143 0.305125 0.176400 0.152563 0.008333 0.252381 0.489286 0.719048 0.996429 0.003571 0.291667 0.541667 0.778571 0.997619 0.001190 0.217857 0.455952 0.733333 1.000000 0.330952 0.309524 0.359524 0.218117 0.221692 0.206198 0.001190 0.222619 0.502381 0.813095 0.998810 0.008333 0.265476 0.495238 0.705952 0.996429 0.002381 0.250000 0.500000 0.728571 1.000000 0.335714 0.432143 0.232143 0.290822 0.140644 0.188319 0.011905 0.251190 0.489286 0.710714 0.996429 0.003571 0.273810 0.533333 0.784524 0.997619 0.001190 0.217857 0.455952 0.733333 1.000000 0.047619 0.078571 0.054762 0.075000 0.025000 0.054762 0.057143 0.046429 0.098810 0.058333 0.048810 0.023810 0.016667 0.015476 0.061905 0.094048 0.077381 0.013095 0.033333 0.019048 
>YBL008w-a
0.329114 0.240506 0.430380 0.179487 0.282051 0.205128 0.025316 0.341772 0.468354 0.658228 0.974684 0.063291 0.316456 0.569620 0.822785 0.987342 0.012658 0.177215 0.329114 0.696203 1.000000 0.265823 0.088608 0.645570 0.025641 0.051282 0.025641 0.012658 0.063291 0.329114 0.924051 1.000000 0.088608 0.088608 0.113924 0.139241 0.278481 0.151899 0.379747 0.569620 0.734177 0.898734 0.582278 0.384615 0.037975 0.202532 0.493671 0.721519 0.949367 0.253165 0.379747 0.367089 0.205128 0.179487 0.243590 0.063291 0.164557 0.443038 0.721519 0.987342 0.050633 0.265823 0.481013 0.746835 1.000000 0.012658 0.215190 0.544304 0.658228 0.974684 0.468354 0.177215 0.354430 0.166667 0.320513 0.141026 0.012658 0.189873 0.329114 0.696203 1.000000 0.063291 0.164557 0.506329 0.822785 0.987342 0.025316 0.354430 0.518987 0.734177 0.974684 0.164557 0.468354 0.367089 0.153846 0.128205 0.294872 0.088608 0.291139 0.493671 0.721519 0.987342 0.050633 0.227848 0.405063 0.734177 1.000000 0.012658 0.215190 0.544304 0.658228 0.974684 0.063291 0.126582 0.000000 0.012658 0.063291 0.063291 0.012658 0.037975 0.063291 0.037975 0.025316 0.025316 0.037975 0.063291 0.037975 0.075949 0.139241 0.025316 0.063291 0.025316 
>YBL009w
0.337278 0.369822 0.292899 0.242963 0.220741 0.207407 0.002959 0.227811 0.467456 0.724852 1.000000 0.007396 0.214497 0.434911 0.699704 0.994083 0.001479 0.328402 0.605030 0.797337 0.998521 0.615385 0.121302 0.263314 0.060741 0.072593 0.013333 0.001479 0.215976 0.390533 0.643491 1.000000 0.029586 0.394970 0.633136 0.721893 0.973373 0.007396 0.508876 0.693787 0.884615 0.997041 0.417160 0.376296 0.004438 0.366864 0.642012 0.818047 0.997041 0.383136 0.363905 0.252959 0.285926 0.176296 0.157037 0.005917 0.196746 0.418639 0.686391 0.994083 0.002959 0.326923 0.566568 0.772189 1.000000 0.001479 0.258876 0.461538 0.782544 0.998521 0.316568 0.312130 0.371302 0.188148 0.251852 0.220741 0.001479 0.328402 0.613905 0.797337 0.998521 0.007396 0.196746 0.405325 0.680473 0.994083 0.002959 0.242604 0.467456 0.727811 1.000000 0.335799 0.411243 0.252959 0.278519 0.157037 0.176296 0.005917 0.177515 0.396450 0.678994 0.994083 0.002959 0.326923 0.565089 0.769231 1.000000 0.001479 0.258876 0.461538 0.782544 0.998521 0.044379 0.084320 0.038462 0.054734 0.050296 0.065089 0.036982 0.031065 0.150888 0.062130 0.031065 0.034024 0.023669 0.016272 0.044379 0.116864 0.048817 0.014793 0.041420 0.010355 
>YBL010c
0.446429 0.267857 0.285714 0.189964 0.218638 0.179211 0.010714 0.257143 0.507143 0.750000 0.978571 0.007143 0.164286 0.467857 0.739286 1.000000 0.003571 0.271429 0.464286 0.725000 0.992857 0.453571 0.039286 0.507143 0.025090 0.075269 0.010753 0.003571 0.110714 0.350000 0.607143 1.000000 0.317857 0.321429 0.339286 0.603571 0.989286 0.171429 0.396429 0.642857 0.789286 0.960714 0.371429 0.408602 0.025000 0.282143 0.432143 0.725000 0.989286 0.328571 0.428571 0.242857 0.275986 0.161290 0.218638 0.007143 0.157143 0.453571 0.717857 0.996429 0.021429 0.253571 0.464286 0.696429 0.992857 0.003571 0.378571 0.610714 0.835714 1.000000 0.307143 0.225000 0.467857 0.157706 0.258065 0.179211 0.003571 0.271429 0.496429 0.742857 1.000000 0.007143 0.157143 0.460714 0.717857 0.996429 0.010714 0.260714 0.507143 0.757143 0.978571 0.282143 0.475000 0.242857 0.240143 0.139785 0.240143 0.007143 0.125000 0.453571 0.728571 0.996429 0.021429 0.253571 0.457143 0.685714 0.992857 0.003571 0.378571 0.610714 0.835714 1.000000 0.057143 0.078571 0.096429 0.089286 0.057143 0.067857 0.028571 0.025000 0.078571 0.060714 0.032143 0.021429 0.021429 0.014286 0.046429 0.114286 0.046429 0.014286 0.042857 0.007143 
>YBL011w
0.329381 0.354414 0.316206 0.224274 0.171504 0.244063 0.006588 0.280632 0.557312 0.828722 0.998682 0.002635 0.217391 0.446640 0.702240 1.000000 0.001318 0.246377 0.491436 0.679842 0.960474 0.392622 0.129117 0.478261 0.050132 0.068602 0.005277 0.001318 0.209486 0.411067 0.837945 1.000000 0.031621 0.200264 0.262187 0.379447 0.877470 0.039526 0.422925 0.584980 0.731225 0.990777 0.530962 0.348285 0.007905 0.216074 0.453228 0.657444 0.955204 0.357049 0.378129 0.264822 0.258575 0.186016 0.189974 0.002635 0.225296 0.455863 0.729908 1.000000 0.007905 0.285903 0.555995 0.797101 0.996047 0.001318 0.231884 0.478261 0.682477 0.994730 0.347826 0.297760 0.354414 0.230871 0.205805 0.192612 0.001318 0.246377 0.486166 0.677207 0.960474 0.002635 0.205534 0.453228 0.722003 1.000000 0.006588 0.293808 0.544137 0.827404 0.998682 0.296443 0.438735 0.264822 0.249340 0.153034 0.222955 0.003953 0.233202 0.483531 0.756258 1.000000 0.002635 0.268775 0.519104 0.770751 0.996047 0.001318 0.231884 0.478261 0.682477 0.994730 0.050066 0.077734 0.083004 0.047431 0.027668 0.043478 0.050066 0.065876 0.084321 0.048748 0.048748 0.025033 0.031621 0.011858 0.065876 0.085639 0.072464 0.025033 0.050066 0.005270 
>YBL013w
0.319202 0.364090 0.316708 0.227500 0.202500 0.232500 0.007481 0.241895 0.543641 0.783042 0.990025 0.019950 0.284289 0.473815 0.680798 0.985037 0.002494 0.214464 0.481297 0.807980 1.000000 0.531172 0.184539 0.284289 0.072500 0.067500 0.002500 0.002494 0.209476 0.481297 0.755611 1.000000 0.009975 0.169576 0.501247 0.862843 0.995012 0.094763 0.274314 0.533666 0.620948 0.985037 0.543641 0.340000 0.009975 0.326683 0.496259 0.755611 0.997506 0.399002 0.359102 0.241895 0.280000 0.190000 0.162500 0.019950 0.271820 0.483791 0.718204 0.985037 0.004988 0.231920 0.468828 0.735661 1.000000 0.002494 0.229426 0.573566 0.805486 0.997506 0.334165 0.326683 0.339152 0.225000 0.230000 0.215000 0.002494 0.214464 0.493766 0.800499 1.000000 0.019950 0.271820 0.458853 0.675810 0.985037 0.007481 0.259352 0.543641 0.780549 0.990025 0.314214 0.443890 0.241895 0.285000 0.150000 0.202500 0.019950 0.296758 0.513716 0.720698 0.985037 0.004988 0.214464 0.438903 0.730673 1.000000 0.002494 0.229426 0.573566 0.805486 0.997506 0.079800 0.054863 0.039900 0.049875 0.047382 0.047382 0.062344 0.087282 0.057357 0.057357 0.062344 0.019950 0.017456 0.022444 0.047382 0.124688 0.052369 0.022444 0.042394 0.004988 
>YBL014c
0.369128 0.317673 0.313199 0.222844 0.227324 0.210526 0.003356 0.256152 0.503356 0.742729 0.996644 0.002237 0.231544 0.515660 0.756152 1.000000 0.001119 0.263982 0.473154 0.741611 0.998881 0.488814 0.163311 0.347875 0.059351 0.075028 0.016797 0.001119 0.190157 0.456376 0.791946 1.000000 0.026846 0.272931 0.416107 0.517897 0.975391 0.012304 0.399329 0.654362 0.779642 0.995526 0.491051 0.398656 0.006711 0.242729 0.442953 0.683445 0.995526 0.364653 0.411633 0.223714 0.305711 0.143337 0.187010 0.002237 0.196868 0.479866 0.750559 1.000000 0.003356 0.260626 0.506711 0.740492 0.995526 0.001119 0.318792 0.522371 0.762864 0.998881 0.335570 0.272931 0.391499 0.184770 0.262038 0.201568 0.001119 0.253915 0.474273 0.740492 0.998881 0.002237 0.230425 0.505593 0.793065 1.000000 0.003356 0.258389 0.507830 0.736018 0.996644 0.312081 0.464206 0.223714 0.298992 0.125420 0.204927 0.002237 0.200224 0.475391 0.734899 1.000000 0.003356 0.255034 0.506711 0.752796 0.995526 0.001119 0.318792 0.522371 0.762864 0.998881 0.048098 0.057047 0.062640 0.085011 0.055928 0.060403 0.036913 0.036913 0.107383 0.045861 0.045861 0.022371 0.022371 0.006711 0.059284 0.092841 0.080537 0.012304 0.045861 0.015660 
>YBL015w
0.325095 0.372624 0.302281 0.224762 0.226667 0.220952 0.009506 0.233840 0.494297 0.745247 1.000000 0.003802 0.269962 0.503802 0.768061 0.996198 0.001901 0.237643 0.490494 0.711027 0.998099 0.488593 0.152091 0.359316 0.074286 0.081905 0.001905 0.001901 0.264259 0.448669 0.747148 1.000000 0.066540 0.275665 0.604563 0.720532 0.986692 0.005703 0.199620 0.541825 0.773764 0.975285 0.659696 0.342857 0.005703 0.266160 0.519011 0.737643 0.992395 0.382129 0.365019 0.252852 0.300952 0.192381 0.186667 0.003802 0.292776 0.503802 0.758555 1.000000 0.005703 0.237643 0.507605 0.711027 0.998099 0.001901 0.214829 0.488593 0.764259 0.992395 0.326996 0.309886 0.363118 0.213333 0.260952 0.201905 0.001901 0.241445 0.488593 0.714829 0.998099 0.003802 0.279468 0.479087 0.750951 0.996198 0.009506 0.233840 0.501901 0.769962 1.000000 0.309886 0.437262 0.252852 0.285714 0.158095 0.220952 0.003802 0.283270 0.536122 0.758555 1.000000 0.005703 0.252852 0.486692 0.711027 0.998099 0.001901 0.214829 0.488593 0.764259 0.992395 0.049430 0.064639 0.062738 0.064639 0.026616 0.057034 0.064639 0.076046 0.053232 0.051331 0.064639 0.038023 0.024715 0.007605 0.072243 0.083650 0.062738 0.024715 0.041825 0.009506 
>YBL016w
0.322946 0.342776 0.334278 0.250000 0.232955 0.190341 0.008499 0.240793 0.478754 0.773371 0.991501 0.005666 0.286119 0.524079 0.753541 1.000000 0.002833 0.218130 0.441926 0.702550 0.997167 0.464589 0.141643 0.393768 0.059659 0.110795 0.008523 0.002833 0.297450 0.509915 0.764873 1.000000 0.014164 0.073654 0.121813 0.263456 0.456091 0.028329 0.339943 0.609065 0.801700 0.997167 0.558074 0.397727 0.019830 0.263456 0.453258 0.662890 0.994334 0.345609 0.373938 0.280453 0.238636 0.190341 0.215909 0.005666 0.300283 0.524079 0.747875 1.000000 0.014164 0.237960 0.419263 0.713881 0.994334 0.002833 0.223796 0.532578 0.773371 0.997167 0.373938 0.269122 0.356941 0.164773 0.281250 0.201705 0.002833 0.243626 0.456091 0.711048 0.997167 0.005666 0.277620 0.524079 0.756374 1.000000 0.008499 0.240793 0.475921 0.773371 0.991501 0.260623 0.458924 0.280453 0.241477 0.136364 0.269886 0.028329 0.297450 0.492918 0.699717 1.000000 0.005666 0.240793 0.464589 0.747875 0.994334 0.002833 0.223796 0.532578 0.773371 0.997167 0.059490 0.062323 0.067989 0.059490 0.033994 0.039660 0.039660 0.056657 0.059490 0.045326 0.067989 0.033994 0.039660 0.016997 0.042493 0.099150 0.090652 0.025496 0.050992 0.008499 
>YBL017c
0.343889 0.360988 0.295123 0.244613 0.193283 0.219265 0.012666 0.243825 0.486384 0.756175 1.000000 0.003167 0.260925 0.519949 0.751742 0.997467 0.000633 0.235592 0.474351 0.731476 0.991767 0.592780 0.302090 0.105130 0.114068 0.038023 0.005070 0.000633 0.272324 0.507283 0.752375 1.000000 0.022799 0.209626 0.406586 0.637112 0.969601 0.001267 0.374921 0.879037 0.925269 0.990500 0.590880 0.326996 0.001900 0.229259 0.495250 0.721976 0.996200 0.412920 0.338189 0.248892 0.283270 0.226236 0.169835 0.005700 0.267891 0.511083 0.760608 0.997467 0.001267 0.224193 0.493350 0.740975 1.000000 0.000633 0.251425 0.490817 0.735909 0.993034 0.334389 0.306523 0.359088 0.217364 0.224335 0.226236 0.000633 0.239392 0.477517 0.731476 0.991767 0.005700 0.260925 0.519949 0.754908 0.997467 0.003167 0.251425 0.493350 0.756808 1.000000 0.353388 0.397720 0.248892 0.279468 0.197085 0.198986 0.005700 0.262191 0.509183 0.753642 0.997467 0.001267 0.235592 0.495883 0.744775 1.000000 0.000633 0.251425 0.490817 0.735909 0.993034 0.034199 0.069031 0.072831 0.082964 0.026599 0.058265 0.070931 0.045598 0.082964 0.070931 0.036099 0.015199 0.039265 0.023433 0.050032 0.068398 0.062065 0.017733 0.062698 0.010766 
>YBL018c
0.360902 0.308271 0.330827 0.113636 0.250000 0.250000 0.022556 0.225564 0.473684 0.849624 0.984962 0.015038 0.248120 0.488722 0.631579 0.842105 0.007519 0.255639 0.503759 0.796992 1.000000 0.413534 0.330827 0.255639 0.106061 0.030303 0.000000 0.007519 0.345865 0.548872 0.706767 1.000000 0.045113 0.120301 0.496241 0.721805 0.834586 0.180451 0.233083 0.300752 0.887218 0.954887 0.548872 0.363636 0.045113 0.248120 0.436090 0.699248 0.977444 0.368421 0.360902 0.270677 0.250000 0.204545 0.227273 0.015038 0.225564 0.548872 0.699248 0.992481 0.060150 0.300752 0.609023 0.812030 1.000000 0.007519 0.097744 0.345865 0.556391 0.984962 0.368421 0.248120 0.383459 0.250000 0.280303 0.113636 0.007519 0.255639 0.481203 0.744361 1.000000 0.015038 0.248120 0.541353 0.654135 0.842105 0.022556 0.203008 0.466165 0.827068 0.984962 0.345865 0.383459 0.270677 0.250000 0.189394 0.242424 0.015038 0.210526 0.541353 0.661654 0.969925 0.060150 0.300752 0.639098 0.819549 1.000000 0.007519 0.097744 0.345865 0.556391 0.984962 0.045113 0.067669 0.075188 0.105263 0.045113 0.022556 0.037594 0.037594 0.105263 0.060150 0.007519 0.022556 0.037594 0.015038 0.060150 0.097744 0.060150 0.022556 0.045113 0.030075 
>YBL019w
0.369231 0.313462 0.317308 0.269750 0.242775 0.177264 0.009615 0.290385 0.550000 0.786538 0.996154 0.003846 0.219231 0.476923 0.726923 0.990385 0.001923 0.234615 0.453846 0.682692 1.000000 0.630769 0.146154 0.223077 0.052023 0.075145 0.001927 0.001923 0.248077 0.540385 0.817308 1.000000 0.032692 0.155769 0.342308 0.638462 0.998077 0.071154 0.375000 0.500000 0.607692 0.786538 0.484615 0.323699 0.032692 0.230769 0.446154 0.648077 0.994231 0.357692 0.365385 0.276923 0.269750 0.184971 0.210019 0.003846 0.255769 0.488462 0.723077 0.990385 0.009615 0.253846 0.467308 0.709615 1.000000 0.001923 0.217308 0.528846 0.788462 0.998077 0.346154 0.269231 0.384615 0.175337 0.271676 0.244701 0.001923 0.232692 0.453846 0.686538 1.000000 0.003846 0.228846 0.478846 0.734615 0.990385 0.009615 0.280769 0.540385 0.784615 0.996154 0.294231 0.428846 0.276923 0.252408 0.152216 0.242775 0.003846 0.244231 0.471154 0.713462 0.990385 0.009615 0.267308 0.490385 0.723077 1.000000 0.001923 0.217308 0.528846 0.788462 0.998077 0.065385 0.086538 0.051923 0.067308 0.034615 0.063462 0.057692 0.034615 0.086538 0.048077 0.042308 0.015385 0.028846 0.021154 0.050000 0.084615 0.080769 0.021154 0.050000 0.009615 
>YBL020w
0.256098 0.308362 0.435540 0.150087 0.202443 0.268761 0.005226 0.229965 0.472125 0.750871 0.998258 0.003484 0.221254 0.451220 0.700348 0.994774 0.001742 0.266551 0.545296 0.787456 1.000000 0.236934 0.031359 0.731707 0.015707 0.075044 0.001745 0.001742 0.177700 0.456446 0.674216 1.000000 0.153310 0.367596 0.541812 0.879791 0.898955 0.020906 0.263066 0.522648 0.768293 0.989547 0.735192 0.198953 0.013937 0.273519 0.517422 0.745645 0.987805 0.297909 0.425087 0.277003 0.239092 0.169284 0.216405 0.003484 0.203833 0.445993 0.710801 0.998258 0.008711 0.266551 0.538328 0.766551 1.000000 0.001742 0.256098 0.487805 0.768293 0.996516 0.475610 0.256098 0.268293 0.246073 0.225131 0.134380 0.001742 0.268293 0.536585 0.775261 1.000000 0.003484 0.203833 0.444251 0.702091 0.994774 0.005226 0.233449 0.491289 0.750871 0.998258 0.263066 0.459930 0.277003 0.232112 0.137871 0.247818 0.003484 0.189895 0.445993 0.712544 0.998258 0.008711 0.266551 0.529617 0.754355 1.000000 0.001742 0.256098 0.487805 0.768293 0.996516 0.038328 0.057491 0.041812 0.029617 0.036585 0.052265 0.045296 0.048780 0.083624 0.055749 0.022648 0.012195 0.040070 0.012195 0.054007 0.141115 0.099303 0.017422 0.095819 0.015679 
>YBL021c
0.402778 0.340278 0.256944 0.223776 0.167832 0.202797 0.013889 0.256944 0.493056 0.798611 0.986111 0.020833 0.166667 0.402778 0.659722 1.000000 0.006944 0.326389 0.527778 0.729167 0.993056 0.493056 0.020833 0.486111 0.027972 0.083916 0.000000 0.006944 0.118056 0.243056 0.673611 1.000000 0.416667 0.416667 0.416667 0.423611 0.666667 0.256944 0.458333 0.583333 0.770833 0.902778 0.354167 0.321678 0.243056 0.354167 0.520833 0.694444 0.888889 0.375000 0.430556 0.194444 0.328671 0.111888 0.174825 0.020833 0.173611 0.430556 0.618056 1.000000 0.013889 0.243056 0.520833 0.798611 0.993056 0.006944 0.354167 0.604167 0.819444 0.944444 0.284722 0.298611 0.416667 0.174825 0.209790 0.195804 0.006944 0.347222 0.548611 0.784722 0.993056 0.020833 0.159722 0.388889 0.590278 1.000000 0.013889 0.256944 0.493056 0.798611 0.986111 0.319444 0.486111 0.194444 0.293706 0.097902 0.188811 0.020833 0.166667 0.430556 0.625000 0.972222 0.013889 0.256944 0.500000 0.777778 1.000000 0.006944 0.354167 0.604167 0.819444 0.944444 0.041667 0.062500 0.104167 0.055556 0.069444 0.069444 0.034722 0.076389 0.104167 0.048611 0.034722 0.013889 0.027778 0.020833 0.048611 0.090278 0.048611 0.027778 0.013889 0.006944 
>YBL022c
0.379523 0.347749 0.272727 0.234982 0.207597 0.199647 0.002648 0.248014 0.455428 0.733451 1.000000 0.003530 0.225066 0.518976 0.768756 0.995587 0.000883 0.313327 0.533098 0.731686 0.993822 0.435128 0.134157 0.430715 0.057420 0.076855 0.002650 0.000883 0.193292 0.476611 0.766108 1.000000 0.047661 0.222418 0.593998 0.831421 0.966461 0.007061 0.359223 0.488967 0.716681 0.977052 0.484554 0.363958 0.008826 0.321271 0.561342 0.771403 0.987643 0.385702 0.374228 0.240071 0.282686 0.179329 0.187279 0.003530 0.223301 0.507502 0.759929 1.000000 0.001765 0.291262 0.481906 0.729038 0.998235 0.000883 0.231244 0.512798 0.753751 0.999117 0.298323 0.305384 0.396293 0.180212 0.234099 0.213781 0.000883 0.304501 0.533098 0.732568 0.993822 0.003530 0.224184 0.514563 0.769638 0.995587 0.002648 0.248014 0.458959 0.730803 1.000000 0.331862 0.428067 0.240071 0.280035 0.151943 0.214664 0.003530 0.218005 0.494263 0.759047 1.000000 0.001765 0.283319 0.491615 0.736981 0.998235 0.000883 0.231244 0.512798 0.753751 0.999117 0.045013 0.094440 0.090026 0.074139 0.035305 0.040600 0.048544 0.067079 0.080318 0.061783 0.047661 0.016770 0.025596 0.006178 0.060900 0.083848 0.063548 0.020300 0.031774 0.006178 
>YBL023c
0.397465 0.323733 0.278802 0.234141 0.215686 0.209919 0.003456 0.177419 0.461982 0.752304 0.989631 0.002304 0.288018 0.521889 0.736175 1.000000 0.001152 0.299539 0.514977 0.763825 0.997696 0.475806 0.154378 0.369816 0.047290 0.098039 0.003460 0.001152 0.158986 0.423963 0.692396 1.000000 0.223502 0.389401 0.488479 0.649770 0.788018 0.005760 0.284562 0.599078 0.859447 0.997696 0.470046 0.343714 0.024194 0.339862 0.581797 0.735023 0.996544 0.364055 0.400922 0.235023 0.314879 0.167243 0.183391 0.002304 0.237327 0.506912 0.728111 0.998848 0.004608 0.241935 0.490783 0.763825 0.997696 0.001152 0.273041 0.500000 0.799539 1.000000 0.308756 0.274194 0.417051 0.199539 0.256055 0.204152 0.001152 0.297235 0.500000 0.763825 0.997696 0.002304 0.290323 0.533410 0.731567 0.998848 0.003456 0.179724 0.467742 0.758065 1.000000 0.312212 0.452765 0.235023 0.303345 0.146482 0.204152 0.002304 0.237327 0.524194 0.730415 0.998848 0.004608 0.238479 0.480415 0.751152 0.997696 0.001152 0.273041 0.500000 0.799539 1.000000 0.088710 0.043779 0.099078 0.079493 0.036866 0.049539 0.052995 0.059908 0.078341 0.041475 0.041475 0.019585 0.029954 0.010369 0.067972 0.084101 0.063364 0.020737 0.028802 0.003456 
>YBL024w
0.385965 0.311404 0.302632 0.232796 0.237189 0.171303 0.004386 0.219298 0.495614 0.744152 1.000000 0.002924 0.257310 0.517544 0.763158 0.998538 0.001462 0.248538 0.479532 0.745614 0.942982 0.535088 0.159357 0.305556 0.068814 0.089312 0.001464 0.001462 0.274854 0.538012 0.720760 1.000000 0.096491 0.326023 0.592105 0.766082 0.921053 0.002924 0.121345 0.407895 0.744152 0.997076 0.488304 0.339678 0.020468 0.251462 0.457602 0.757310 0.992690 0.349415 0.388889 0.261696 0.260615 0.161054 0.218155 0.002924 0.277778 0.535088 0.766082 0.998538 0.008772 0.238304 0.485380 0.741228 1.000000 0.001462 0.184211 0.448830 0.728070 0.967836 0.317251 0.270468 0.412281 0.152269 0.259151 0.219619 0.001462 0.248538 0.485380 0.741228 0.942982 0.002924 0.258772 0.532164 0.766082 0.998538 0.004386 0.220760 0.486842 0.742690 1.000000 0.279240 0.459064 0.261696 0.256223 0.133236 0.245974 0.002924 0.280702 0.535088 0.774854 0.998538 0.008772 0.241228 0.491228 0.738304 1.000000 0.001462 0.184211 0.448830 0.728070 0.967836 0.052632 0.089181 0.084795 0.058480 0.030702 0.070175 0.043860 0.065789 0.057018 0.054094 0.049708 0.026316 0.014620 0.020468 0.071637 0.086257 0.045322 0.017544 0.043860 0.017544 
>YBL025w
0.358621 0.317241 0.324138 0.229167 0.229167 0.201389 0.013793 0.227586 0.406897 0.737931 0.993103 0.041379 0.248276 0.572414 0.793103 0.986207 0.006897 0.213793 0.482759 0.696552 1.000000 0.462069 0.041379 0.496552 0.048611 0.090278 0.006944 0.006897 0.268966 0.413793 0.827586 1.000000 0.137931 0.137931 0.310345 0.400000 0.848276 0.034483 0.193103 0.551724 0.717241 0.924138 0.496552 0.430556 0.034483 0.241379 0.503448 0.675862 0.951724 0.337931 0.427586 0.234483 0.312500 0.159722 0.194444 0.013793 0.234483 0.462069 0.765517 0.986207 0.027586 0.227586 0.468966 0.696552 1.000000 0.006897 0.268966 0.510345 0.751724 0.965517 0.365517 0.241379 0.393103 0.173611 0.298611 0.201389 0.006897 0.241379 0.503448 0.696552 1.000000 0.055172 0.234483 0.524138 0.793103 0.986207 0.013793 0.227586 0.420690 0.737931 0.993103 0.275862 0.489655 0.234483 0.305556 0.138889 0.215278 0.013793 0.220690 0.462069 0.765517 0.986207 0.027586 0.241379 0.468966 0.703448 1.000000 0.006897 0.268966 0.510345 0.751724 0.965517 0.041379 0.068966 0.089655 0.075862 0.027586 0.055172 0.055172 0.055172 0.041379 0.048276 0.041379 0.034483 0.041379 0.020690 0.075862 0.068966 0.110345 0.006897 0.034483 0.006897 
>YBL026w
0.400000 0.221053 0.378947 0.127660 0.308511 0.170213 0.084211 0.252632 0.505263 0.789474 1.000000 0.052632 0.326316 0.557895 0.694737 0.968421 0.010526 0.157895 0.378947 0.652632 0.957895 0.294737 0.442105 0.263158 0.117021 0.053191 0.010638 0.010526 0.231579 0.536842 0.778947 1.000000 0.147368 0.263158 0.431579 0.621053 0.757895 0.031579 0.084211 0.831579 0.894737 0.968421 0.494737 0.425532 0.031579 0.263158 0.452632 0.684211 0.947368 0.263158 0.452632 0.284211 0.223404 0.095745 0.287234 0.052632 0.294737 0.484211 0.684211 0.968421 0.021053 0.200000 0.400000 0.736842 0.978947 0.010526 0.084211 0.536842 0.747368 1.000000 0.410526 0.178947 0.410526 0.138298 0.340426 0.117021 0.010526 0.157895 0.400000 0.705263 0.957895 0.052632 0.294737 0.547368 0.684211 0.968421 0.084211 0.252632 0.505263 0.789474 1.000000 0.242105 0.473684 0.284211 0.244681 0.074468 0.308511 0.052632 0.284211 0.484211 0.694737 0.968421 0.021053 0.221053 0.421053 0.705263 0.978947 0.010526 0.084211 0.536842 0.747368 1.000000 0.063158 0.084211 0.063158 0.073684 0.042105 0.073684 0.031579 0.010526 0.052632 0.073684 0.010526 0.010526 0.031579 0.010526 0.105263 0.115789 0.052632 0.031579 0.063158 0.000000 
>YBL027w
0.449735 0.333333 0.216931 0.361702 0.148936 0.132979 0.015873 0.275132 0.550265 0.809524 0.994709 0.010582 0.253968 0.412698 0.682540 1.000000 0.005291 0.169312 0.497354 0.645503 0.978836 0.259259 0.031746 0.708995 0.015957 0.101064 0.005319 0.005291 0.190476 0.317460 0.476190 1.000000 0.116402 0.116402 0.126984 0.264550 0.275132 0.026455 0.333333 0.576720 0.809524 0.989418 0.296296 0.393617 0.021164 0.185185 0.507937 0.656085 0.978836 0.312169 0.338624 0.349206 0.244681 0.218085 0.234043 0.010582 0.195767 0.417989 0.767196 1.000000 0.015873 0.206349 0.507937 0.756614 0.989418 0.005291 0.317460 0.529101 0.708995 0.984127 0.238095 0.275132 0.486772 0.111702 0.191489 0.340426 0.005291 0.216931 0.502646 0.645503 0.978836 0.010582 0.195767 0.402116 0.693122 1.000000 0.015873 0.306878 0.571429 0.804233 0.994709 0.301587 0.349206 0.349206 0.244681 0.218085 0.234043 0.010582 0.211640 0.417989 0.767196 1.000000 0.015873 0.190476 0.497354 0.751323 0.989418 0.005291 0.317460 0.529101 0.708995 0.984127 0.148148 0.121693 0.063492 0.037037 0.037037 0.042328 0.047619 0.137566 0.047619 0.031746 0.010582 0.037037 0.021164 0.000000 0.074074 0.084656 0.037037 0.005291 0.005291 0.010582 
>YBL028c
0.509434 0.283019 0.207547 0.247619 0.228571 0.114286 0.028302 0.292453 0.490566 0.679245 0.990566 0.018868 0.122642 0.660377 0.801887 0.981132 0.009434 0.198113 0.396226 0.575472 1.000000 0.462264 0.018868 0.518868 0.019048 0.057143 0.000000 0.009434 0.547170 0.660377 0.792453 1.000000 0.698113 0.698113 0.698113 0.698113 0.707547 0.028302 0.198113 0.330189 0.462264 0.905660 0.207547 0.361905 0.047170 0.245283 0.462264 0.707547 0.971698 0.320755 0.283019 0.396226 0.200000 0.257143 0.219048 0.018868 0.188679 0.547170 0.735849 0.981132 0.047170 0.245283 0.415094 0.537736 0.905660 0.009434 0.226415 0.603774 0.830189 1.000000 0.216981 0.245283 0.537736 0.114286 0.247619 0.247619 0.009434 0.198113 0.396226 0.707547 1.000000 0.018868 0.122642 0.622642 0.745283 0.981132 0.028302 0.292453 0.490566 0.688679 0.990566 0.311321 0.292453 0.396226 0.209524 0.247619 0.228571 0.018868 0.188679 0.528302 0.735849 0.981132 0.047170 0.245283 0.415094 0.575472 0.905660 0.009434 0.226415 0.603774 0.830189 1.000000 0.084906 0.207547 0.075472 0.075472 0.047170 0.018868 0.037736 0.066038 0.094340 0.037736 0.009434 0.028302 0.009434 0.000000 0.037736 0.075472 0.028302 0.028302 0.028302 0.009434 
>YBL029c-a
0.361702 0.265957 0.372340 0.118280 0.193548 0.290323 0.117021 0.425532 0.755319 0.882979 1.000000 0.021277 0.170213 0.287234 0.404255 0.989362 0.010638 0.138298 0.500000 0.648936 0.936170 0.659574 0.148936 0.191489 0.064516 0.043011 0.000000 0.010638 0.212766 0.382979 0.638298 1.000000 0.031915 0.053191 0.478723 0.510638 0.595745 0.734043 0.808511 0.861702 0.904255 0.957447 0.521277 0.365591 0.031915 0.212766 0.478723 0.606383 0.936170 0.297872 0.404255 0.297872 0.247312 0.182796 0.236559 0.021277 0.159574 0.308511 0.574468 0.989362 0.042553 0.351064 0.648936 0.861702 1.000000 0.010638 0.244681 0.468085 0.659574 0.968085 0.404255 0.202128 0.393617 0.258065 0.247312 0.086022 0.010638 0.180851 0.478723 0.606383 0.936170 0.021277 0.127660 0.234043 0.489362 0.989362 0.117021 0.351064 0.734043 0.851064 1.000000 0.159574 0.542553 0.297872 0.107527 0.150538 0.268817 0.021277 0.127660 0.191489 0.393617 0.797872 0.042553 0.308511 0.574468 0.829787 1.000000 0.010638 0.244681 0.468085 0.659574 0.968085 0.031915 0.074468 0.031915 0.042553 0.095745 0.085106 0.042553 0.000000 0.053191 0.021277 0.085106 0.031915 0.031915 0.053191 0.063830 0.053191 0.074468 0.021277 0.074468 0.031915 
>YBL029w
0.380319 0.382979 0.236702 0.232000 0.194667 0.176000 0.010638 0.223404 0.510638 0.781915 0.994681 0.007979 0.311170 0.494681 0.688830 1.000000 0.002660 0.202128 0.465426 0.771277 0.981383 0.656915 0.071809 0.271277 0.045333 0.045333 0.002667 0.002660 0.186170 0.390957 0.625000 1.000000 0.117021 0.327128 0.406915 0.579787 0.888298 0.151596 0.550532 0.800532 0.920213 0.992021 0.382979 0.394667 0.013298 0.199468 0.489362 0.792553 0.981383 0.382979 0.398936 0.218085 0.264000 0.154667 0.152000 0.005319 0.305851 0.476064 0.664894 1.000000 0.010638 0.204787 0.414894 0.750000 0.986702 0.002660 0.340426 0.680851 0.882979 0.994681 0.279255 0.327128 0.393617 0.197333 0.237333 0.189333 0.002660 0.175532 0.489362 0.789894 0.981383 0.007979 0.321809 0.481383 0.678191 1.000000 0.010638 0.231383 0.513298 0.781915 0.994681 0.308511 0.473404 0.218085 0.280000 0.128000 0.178667 0.007979 0.300532 0.486702 0.678191 1.000000 0.005319 0.207447 0.425532 0.731383 0.986702 0.002660 0.340426 0.680851 0.882979 0.994681 0.047872 0.058511 0.069149 0.045213 0.023936 0.135638 0.018617 0.039894 0.148936 0.055851 0.063830 0.013298 0.042553 0.010638 0.021277 0.093085 0.055851 0.015957 0.037234 0.002660 
>YBL030c
0.261006 0.408805 0.330189 0.198738 0.164038 0.249211 0.012579 0.201258 0.380503 0.676101 1.000000 0.006289 0.257862 0.500000 0.735849 0.987421 0.003145 0.270440 0.569182 0.767296 0.996855 0.289308 0.000000 0.710692 0.000000 0.107256 0.000000 0.003145 0.128931 0.459119 0.704403 1.000000 0 0 0 0 0 0.072327 0.289308 0.500000 0.754717 0.987421 0.732704 0.157729 0.022013 0.295597 0.544025 0.754717 0.984277 0.424528 0.298742 0.276730 0.249211 0.192429 0.141956 0.006289 0.242138 0.496855 0.754717 0.987421 0.012579 0.188679 0.465409 0.729560 0.981132 0.003145 0.301887 0.503145 0.773585 1.000000 0.371069 0.367925 0.261006 0.242902 0.195584 0.167192 0.003145 0.295597 0.584906 0.767296 0.996855 0.006289 0.245283 0.490566 0.735849 0.987421 0.012579 0.201258 0.380503 0.676101 1.000000 0.380503 0.342767 0.276730 0.271293 0.176656 0.157729 0.006289 0.267296 0.500000 0.751572 0.987421 0.012579 0.176101 0.455975 0.729560 0.981132 0.003145 0.301887 0.503145 0.773585 1.000000 0.047170 0.084906 0.025157 0.044025 0.031447 0.028302 0.110063 0.106918 0.072327 0.047170 0.031447 0.000000 0.040881 0.012579 0.066038 0.106918 0.040881 0.031447 0.062893 0.009434 
>YBL031w
0.375740 0.411243 0.213018 0.329377 0.178042 0.163205 0.005917 0.215976 0.449704 0.721893 1.000000 0.026627 0.295858 0.568047 0.775148 0.991124 0.002959 0.198225 0.491124 0.718935 0.997041 0.730769 0.062130 0.207101 0.023739 0.071217 0.011869 0.002959 0.263314 0.547337 0.766272 1.000000 0.079882 0.118343 0.707101 0.905325 0.923077 0.011834 0.198225 0.455621 0.526627 0.822485 0.316568 0.362018 0.014793 0.189349 0.455621 0.615385 0.952663 0.405325 0.328402 0.266272 0.270030 0.240356 0.169139 0.008876 0.292899 0.553254 0.775148 0.991124 0.005917 0.192308 0.452663 0.701183 0.994083 0.002959 0.278107 0.476331 0.730769 1.000000 0.227811 0.360947 0.411243 0.154303 0.210682 0.314540 0.002959 0.221893 0.473373 0.713018 0.997041 0.041420 0.316568 0.585799 0.795858 0.991124 0.005917 0.215976 0.446746 0.707101 1.000000 0.355030 0.378698 0.266272 0.258160 0.198813 0.210682 0.008876 0.284024 0.553254 0.810651 0.985207 0.005917 0.213018 0.464497 0.689349 0.994083 0.002959 0.278107 0.476331 0.730769 1.000000 0.071006 0.085799 0.035503 0.044379 0.044379 0.094675 0.032544 0.035503 0.159763 0.082840 0.050296 0.035503 0.014793 0.000000 0.038462 0.062130 0.053254 0.023669 0.032544 0.002959 
>YBL032w
0.356955 0.370079 0.272966 0.226316 0.200000 0.181579 0.007874 0.314961 0.608924 0.834646 0.997375 0.005249 0.160105 0.430446 0.658793 1.000000 0.002625 0.257218 0.493438 0.708661 0.955381 0.614173 0.175853 0.209974 0.065789 0.039474 0.002632 0.002625 0.223097 0.490814 0.779528 1.000000 0.115486 0.204724 0.446194 0.690289 0.818898 0.073491 0.278215 0.564304 0.750656 0.989501 0.364829 0.342105 0.010499 0.259843 0.480315 0.711286 0.955381 0.391076 0.404199 0.204724 0.271053 0.121053 0.176316 0.005249 0.167979 0.435696 0.666667 1.000000 0.007874 0.283465 0.517060 0.766404 0.997375 0.002625 0.346457 0.622047 0.803150 0.989501 0.288714 0.333333 0.377953 0.160526 0.221053 0.210526 0.002625 0.262467 0.493438 0.706037 0.955381 0.005249 0.144357 0.430446 0.661417 1.000000 0.007874 0.322835 0.598425 0.832021 0.997375 0.343832 0.451444 0.204724 0.278947 0.107895 0.189474 0.005249 0.165354 0.443570 0.671916 1.000000 0.007874 0.272966 0.501312 0.745407 0.997375 0.002625 0.346457 0.622047 0.803150 0.989501 0.047244 0.078740 0.091864 0.052493 0.018373 0.068241 0.062992 0.081365 0.089239 0.057743 0.041995 0.020997 0.015748 0.005249 0.057743 0.065617 0.102362 0.007874 0.034121 0.000000 
>YBL033c
0.356522 0.376812 0.266667 0.276163 0.194767 0.212209 0.011594 0.231884 0.472464 0.739130 0.968116 0.005797 0.272464 0.501449 0.771014 0.997101 0.002899 0.266667 0.550725 0.733333 1.000000 0.472464 0.191304 0.336232 0.066860 0.055233 0.014535 0.002899 0.173913 0.455072 0.823188 1.000000 0.046377 0.255072 0.373913 0.724638 0.994203 0.142029 0.263768 0.582609 0.695652 0.913043 0.556522 0.383721 0.008696 0.263768 0.469565 0.686957 0.994203 0.411594 0.365217 0.223188 0.328488 0.194767 0.197674 0.005797 0.243478 0.460870 0.707246 0.997101 0.008696 0.255072 0.568116 0.762319 1.000000 0.002899 0.231884 0.457971 0.727536 0.965217 0.295652 0.315942 0.388406 0.186047 0.232558 0.267442 0.002899 0.263768 0.527536 0.730435 1.000000 0.005797 0.272464 0.489855 0.771014 0.997101 0.011594 0.234783 0.481159 0.742029 0.968116 0.353623 0.423188 0.223188 0.302326 0.174419 0.218023 0.005797 0.223188 0.446377 0.684058 0.997101 0.008696 0.255072 0.562319 0.779710 1.000000 0.002899 0.231884 0.457971 0.727536 0.965217 0.072464 0.046377 0.063768 0.075362 0.040580 0.057971 0.089855 0.063768 0.060870 0.063768 0.037681 0.031884 0.028986 0.020290 0.043478 0.101449 0.057971 0.017391 0.017391 0.008696 
>YBL034c
0.374091 0.303371 0.322538 0.205026 0.238757 0.183862 0.003305 0.231328 0.522141 0.742895 1.000000 0.001322 0.281560 0.458030 0.721084 0.998678 0.000661 0.243886 0.530734 0.795109 0.997356 0.420357 0.079974 0.499670 0.031085 0.087963 0.008598 0.000661 0.331130 0.522802 0.730337 1.000000 0.015863 0.463318 0.656973 0.780568 0.997356 0.023133 0.211500 0.370787 0.825512 0.998017 0.467284 0.388889 0.002644 0.232650 0.518837 0.803701 0.998017 0.324521 0.421679 0.253800 0.260582 0.149471 0.200397 0.001322 0.287508 0.488434 0.746861 0.998678 0.003305 0.218110 0.478519 0.741573 1.000000 0.000661 0.278255 0.536021 0.770654 0.996695 0.353602 0.255122 0.391276 0.163360 0.275132 0.181878 0.000661 0.243225 0.520159 0.781890 0.997356 0.001322 0.285525 0.458691 0.732320 0.998678 0.003305 0.230007 0.516854 0.743556 1.000000 0.278916 0.467284 0.253800 0.255952 0.122354 0.227513 0.001322 0.285525 0.477859 0.740251 0.998678 0.003305 0.223397 0.487773 0.747521 1.000000 0.000661 0.278255 0.536021 0.770654 0.996695 0.029081 0.086583 0.067416 0.060145 0.038334 0.092531 0.018506 0.038995 0.101785 0.059484 0.036352 0.017184 0.031064 0.009253 0.037013 0.112360 0.074025 0.029081 0.054858 0.005948 
>YBL035c
0.333333 0.378723 0.287943 0.237216 0.228693 0.210227 0.008511 0.225532 0.469504 0.758865 0.994326 0.002837 0.238298 0.459574 0.719149 1.000000 0.001418 0.303546 0.561702 0.760284 0.997163 0.560284 0.150355 0.289362 0.056818 0.065341 0.008523 0.001418 0.243972 0.486525 0.729078 1.000000 0.007092 0.417021 0.497872 0.731915 0.978723 0.025532 0.163121 0.543262 0.787234 0.997163 0.519149 0.380682 0.005674 0.324823 0.580142 0.792908 0.997163 0.388652 0.385816 0.225532 0.282670 0.170455 0.157670 0.002837 0.235461 0.455319 0.719149 1.000000 0.007092 0.289362 0.519149 0.748936 0.997163 0.001418 0.221277 0.510638 0.775887 0.991489 0.316312 0.330496 0.353191 0.198864 0.259943 0.228693 0.001418 0.317730 0.561702 0.768794 0.997163 0.002837 0.234043 0.449645 0.704965 1.000000 0.008511 0.225532 0.472340 0.758865 0.994326 0.316312 0.458156 0.225532 0.286932 0.137784 0.190341 0.002837 0.226950 0.436879 0.719149 1.000000 0.007092 0.287943 0.523404 0.744681 0.997163 0.001418 0.221277 0.510638 0.775887 0.991489 0.038298 0.072340 0.062411 0.052482 0.049645 0.058156 0.051064 0.045390 0.100709 0.066667 0.066667 0.019858 0.028369 0.005674 0.058156 0.089362 0.068085 0.012766 0.051064 0.002837 
>YBL036c
0.392996 0.295720 0.311284 0.238281 0.277344 0.175781 0.031128 0.256809 0.486381 0.743191 0.992218 0.007782 0.233463 0.498054 0.782101 0.988327 0.003891 0.249027 0.505837 0.712062 1.000000 0.389105 0.143969 0.466926 0.054688 0.093750 0.000000 0.003891 0.272374 0.564202 0.836576 1.000000 0.163424 0.342412 0.540856 0.696498 0.933852 0.035019 0.217899 0.455253 0.743191 0.953307 0.517510 0.453125 0.019455 0.303502 0.544747 0.785992 0.996109 0.330739 0.420233 0.249027 0.257812 0.187500 0.199219 0.007782 0.264591 0.521401 0.782101 0.988327 0.019455 0.217899 0.443580 0.665370 1.000000 0.003891 0.276265 0.501946 0.797665 0.992218 0.334630 0.252918 0.412451 0.152344 0.316406 0.214844 0.003891 0.229572 0.455253 0.700389 1.000000 0.007782 0.245136 0.529183 0.832685 0.988327 0.031128 0.252918 0.486381 0.739300 0.992218 0.287938 0.463035 0.249027 0.234375 0.164062 0.222656 0.007782 0.237354 0.564202 0.817121 0.988327 0.019455 0.221790 0.455253 0.665370 1.000000 0.003891 0.276265 0.501946 0.797665 0.992218 0.038911 0.101167 0.089494 0.062257 0.035019 0.066148 0.050584 0.066148 0.066148 0.042802 0.027237 0.019455 0.023346 0.015564 0.062257 0.085603 0.081712 0.015564 0.038911 0.011673 
>YBL037w
0.312195 0.346341 0.341463 0.213867 0.222656 0.229492 0.001951 0.210732 0.462439 0.725854 1.000000 0.005854 0.273171 0.557073 0.772683 0.999024 0.000976 0.254634 0.486829 0.742439 0.998049 0.370732 0.085854 0.543415 0.029297 0.087891 0.001953 0.000976 0.307317 0.668293 0.787317 1.000000 0.282927 0.776585 0.844878 0.949268 0.980488 0.003902 0.191220 0.393171 0.558049 0.997073 0.546341 0.373047 0.005854 0.235122 0.476098 0.756098 0.998049 0.362927 0.421463 0.215610 0.303711 0.129883 0.188477 0.001951 0.286829 0.547317 0.767805 0.999024 0.006829 0.236098 0.465366 0.717073 0.998049 0.000976 0.202927 0.511220 0.749268 1.000000 0.373659 0.303415 0.322927 0.209961 0.261719 0.182617 0.000976 0.245854 0.478049 0.738537 0.998049 0.005854 0.288780 0.565854 0.772683 0.999024 0.001951 0.208780 0.465366 0.732683 1.000000 0.314146 0.470244 0.215610 0.303711 0.110352 0.208008 0.001951 0.270244 0.540488 0.765854 0.999024 0.006829 0.255610 0.479024 0.732683 0.998049 0.000976 0.202927 0.511220 0.749268 1.000000 0.040000 0.070244 0.050732 0.047805 0.041951 0.061463 0.037073 0.051707 0.101463 0.076098 0.037073 0.010732 0.032195 0.011707 0.055610 0.121951 0.089756 0.017561 0.038049 0.006829 
>YBL038w
0.370690 0.336207 0.293103 0.272727 0.242424 0.203463 0.030172 0.254310 0.534483 0.801724 1.000000 0.012931 0.232759 0.461207 0.728448 0.995690 0.004310 0.241379 0.491379 0.711207 0.987069 0.521552 0.198276 0.280172 0.099567 0.073593 0.004329 0.004310 0.224138 0.500000 0.745690 1.000000 0.090517 0.293103 0.590517 0.650862 0.982759 0.017241 0.327586 0.422414 0.728448 0.974138 0.491379 0.415584 0.008621 0.241379 0.431034 0.642241 0.987069 0.323276 0.336207 0.340517 0.242424 0.190476 0.251082 0.012931 0.258621 0.495690 0.728448 0.995690 0.021552 0.250000 0.487069 0.754310 0.982759 0.004310 0.215517 0.482759 0.758621 1.000000 0.327586 0.280172 0.392241 0.177489 0.294372 0.229437 0.004310 0.241379 0.491379 0.754310 0.987069 0.012931 0.232759 0.413793 0.706897 0.995690 0.030172 0.254310 0.534483 0.801724 1.000000 0.267241 0.392241 0.340517 0.216450 0.164502 0.277056 0.025862 0.262931 0.495690 0.706897 0.995690 0.012931 0.245690 0.491379 0.762931 0.982759 0.004310 0.215517 0.482759 0.758621 1.000000 0.081897 0.116379 0.047414 0.034483 0.030172 0.060345 0.090517 0.047414 0.051724 0.043103 0.047414 0.021552 0.034483 0.008621 0.060345 0.090517 0.047414 0.025862 0.051724 0.008621 
>YBL039c
0.317789 0.352332 0.329879 0.223183 0.226644 0.237024 0.003454 0.288428 0.537133 0.787565 0.998273 0.005181 0.207254 0.497409 0.735751 0.989637 0.001727 0.245250 0.455959 0.711572 1.000000 0.461140 0.184801 0.354059 0.074394 0.067474 0.008651 0.001727 0.229706 0.487047 0.768566 1.000000 0.005181 0.132988 0.416235 0.785838 0.920553 0.027634 0.317789 0.504318 0.701209 0.975820 0.606218 0.328720 0.005181 0.203800 0.455959 0.718480 0.996546 0.360967 0.386874 0.252159 0.294118 0.179931 0.193772 0.012090 0.222798 0.468048 0.716753 0.989637 0.006908 0.260794 0.481865 0.754750 0.998273 0.001727 0.290155 0.550950 0.778929 1.000000 0.360967 0.286701 0.352332 0.211073 0.276817 0.193772 0.001727 0.238342 0.462867 0.723661 1.000000 0.012090 0.207254 0.488774 0.709845 0.989637 0.003454 0.291883 0.537133 0.787565 0.998273 0.307427 0.440415 0.252159 0.278547 0.140138 0.233564 0.012090 0.189983 0.476684 0.709845 0.989637 0.006908 0.260794 0.478411 0.754750 0.998273 0.001727 0.290155 0.550950 0.778929 1.000000 0.036269 0.077720 0.082902 0.060449 0.025907 0.034542 0.082902 0.051813 0.051813 0.060449 0.039724 0.034542 0.031088 0.013817 0.079447 0.094991 0.069085 0.029361 0.032815 0.010363 
>YBL039w-b
0.271186 0.338983 0.389831 0.137931 0.120690 0.275862 0.084746 0.186441 0.813559 0.932203 1.000000 0.033898 0.338983 0.508475 0.728814 0.898305 0.016949 0.169492 0.440678 0.627119 0.830508 0.542373 0.135593 0.322034 0.051724 0.086207 0.017241 0.016949 0.135593 0.593220 0.864407 1.000000 0.152542 0.169492 0.203390 0.237288 0.813559 0.254237 0.406780 0.491525 0.610169 0.694915 0.661017 0.206897 0.050847 0.220339 0.457627 0.627119 0.830508 0.355932 0.254237 0.389831 0.189655 0.224138 0.155172 0.033898 0.355932 0.559322 0.745763 0.983051 0.084746 0.118644 0.271186 0.542373 0.966102 0.016949 0.220339 0.440678 0.711864 1.000000 0.406780 0.305085 0.288136 0.224138 0.137931 0.120690 0.016949 0.203390 0.457627 0.644068 0.830508 0.033898 0.338983 0.508475 0.728814 0.898305 0.084746 0.186441 0.322034 0.915254 1.000000 0.288136 0.322034 0.389831 0.206897 0.206897 0.172414 0.033898 0.372881 0.576271 0.745763 0.983051 0.084746 0.135593 0.338983 0.559322 0.966102 0.016949 0.220339 0.440678 0.711864 1.000000 0.033898 0.101695 0.016949 0.033898 0.000000 0.084746 0.033898 0.033898 0.118644 0.067797 0.050847 0.016949 0.016949 0.016949 0.033898 0.033898 0.084746 0.067797 0.135593 0.016949 
>YBL040c
0.205479 0.365297 0.429224 0.201835 0.151376 0.348624 0.009132 0.228311 0.465753 0.817352 1.000000 0.013699 0.251142 0.511416 0.739726 0.995434 0.004566 0.237443 0.479452 0.707763 0.990868 0.232877 0.050228 0.716895 0.013761 0.059633 0.004587 0.004566 0.383562 0.442922 0.684932 1.000000 0.456621 0.461187 0.474886 0.488584 0.986301 0.013699 0.223744 0.515982 0.744292 0.958904 0.762557 0.165138 0.013699 0.237443 0.502283 0.730594 0.990868 0.287671 0.365297 0.347032 0.247706 0.211009 0.229358 0.013699 0.228311 0.497717 0.739726 0.995434 0.009132 0.205479 0.420091 0.657534 0.990868 0.004566 0.292237 0.538813 0.794521 1.000000 0.497717 0.260274 0.242009 0.270642 0.220183 0.160550 0.004566 0.246575 0.484018 0.735160 0.990868 0.013699 0.242009 0.497717 0.703196 0.995434 0.009132 0.228311 0.465753 0.780822 1.000000 0.269406 0.383562 0.347032 0.220183 0.201835 0.238532 0.036530 0.228311 0.493151 0.730594 0.977169 0.009132 0.205479 0.429224 0.698630 0.995434 0.004566 0.292237 0.538813 0.794521 1.000000 0.036530 0.068493 0.022831 0.027397 0.022831 0.027397 0.045662 0.050228 0.068493 0.077626 0.018265 0.036530 0.068493 0.000000 0.045662 0.150685 0.095890 0.031963 0.082192 0.022831 
>YBL041w
0.340249 0.385892 0.273859 0.245833 0.191667 0.212500 0.029046 0.278008 0.556017 0.780083 1.000000 0.008299 0.178423 0.448133 0.659751 0.979253 0.004149 0.286307 0.522822 0.792531 0.987552 0.435685 0.302905 0.261411 0.137500 0.029167 0.004167 0.004149 0.149378 0.431535 0.734440 1.000000 0.016598 0.203320 0.539419 0.659751 0.983402 0.319502 0.377593 0.473029 0.817427 0.883817 0.676349 0.295833 0.008299 0.290456 0.497925 0.721992 1.000000 0.390041 0.344398 0.265560 0.237500 0.175000 0.187500 0.008299 0.182573 0.431535 0.663900 1.000000 0.016598 0.244813 0.539419 0.804979 0.987552 0.004149 0.356846 0.502075 0.771784 0.995851 0.327801 0.307054 0.365145 0.204167 0.250000 0.187500 0.004149 0.269710 0.514523 0.775934 0.987552 0.008299 0.149378 0.443983 0.663900 0.954357 0.029046 0.282158 0.497925 0.780083 1.000000 0.348548 0.385892 0.265560 0.229167 0.141667 0.220833 0.008299 0.182573 0.414938 0.663900 1.000000 0.016598 0.248963 0.539419 0.775934 0.987552 0.004149 0.356846 0.502075 0.771784 0.995851 0.045643 0.070539 0.062241 0.074689 0.024896 0.062241 0.087137 0.078838 0.066390 0.041494 0.033195 0.024896 0.053942 0.008299 0.066390 0.062241 0.066390 0.012448 0.053942 0.004149 
>YBL042c
0.242567 0.383412 0.374022 0.170846 0.164577 0.311912 0.007825 0.129890 0.380282 0.685446 0.996870 0.003130 0.294210 0.566510 0.774648 0.998435 0.001565 0.286385 0.477308 0.732394 1.000000 0.334898 0.045383 0.619718 0.017241 0.083072 0.007837 0.001565 0.136150 0.384977 0.796557 1.000000 0.061033 0.079812 0.118936 0.824726 0.998435 0.039124 0.341158 0.546166 0.740219 0.973396 0.744914 0.194357 0.012520 0.327074 0.543036 0.746479 0.995305 0.383412 0.352113 0.264476 0.280564 0.202194 0.194357 0.003130 0.237872 0.514867 0.738654 0.989045 0.004695 0.245696 0.489828 0.727700 1.000000 0.001565 0.255086 0.467919 0.794992 0.998435 0.430360 0.319249 0.250391 0.299373 0.199060 0.142633 0.001565 0.302034 0.525822 0.769953 1.000000 0.003130 0.281690 0.538341 0.751174 0.989045 0.007825 0.136150 0.383412 0.685446 0.996870 0.331768 0.403756 0.264476 0.252351 0.173981 0.222571 0.006260 0.233177 0.517997 0.746479 0.989045 0.003130 0.256651 0.489828 0.729264 1.000000 0.001565 0.255086 0.467919 0.794992 0.998435 0.032864 0.053208 0.037559 0.046948 0.017214 0.054773 0.064163 0.076682 0.081377 0.062598 0.034429 0.007825 0.056338 0.017214 0.064163 0.087637 0.090767 0.015649 0.067293 0.031299 
>YBL043w
0.373541 0.431907 0.194553 0.320312 0.140625 0.191406 0.007782 0.276265 0.470817 0.708171 0.968872 0.011673 0.264591 0.556420 0.750973 1.000000 0.003891 0.155642 0.400778 0.801556 0.992218 0.587549 0.089494 0.322957 0.031250 0.054688 0.015625 0.003891 0.385214 0.540856 0.828794 1.000000 0.101167 0.311284 0.614786 0.653696 0.863813 0.031128 0.147860 0.229572 0.704280 0.848249 0.389105 0.375000 0.031128 0.198444 0.556420 0.704280 0.984436 0.474708 0.334630 0.190661 0.324219 0.171875 0.128906 0.011673 0.280156 0.513619 0.762646 1.000000 0.007782 0.202335 0.389105 0.739300 0.992218 0.003891 0.190661 0.533074 0.638132 0.976654 0.245136 0.350195 0.404669 0.160156 0.226562 0.281250 0.003891 0.159533 0.435798 0.700389 0.992218 0.011673 0.256809 0.560311 0.762646 1.000000 0.007782 0.276265 0.494163 0.708171 0.976654 0.424125 0.385214 0.190661 0.339844 0.156250 0.144531 0.011673 0.280156 0.509728 0.758755 1.000000 0.007782 0.206226 0.404669 0.770428 0.992218 0.003891 0.190661 0.533074 0.638132 0.976654 0.027237 0.046693 0.093385 0.112840 0.023346 0.070039 0.031128 0.073930 0.120623 0.085603 0.038911 0.031128 0.050584 0.011673 0.046693 0.066148 0.035019 0.007782 0.027237 0.000000 
>YBL044w
0.336066 0.393443 0.270492 0.297521 0.140496 0.231405 0.024590 0.163934 0.450820 0.803279 1.000000 0.016393 0.237705 0.442623 0.704918 0.926230 0.008197 0.311475 0.540984 0.754098 0.959016 0.655738 0.147541 0.196721 0.049587 0.082645 0.016529 0.008197 0.352459 0.614754 0.803279 1.000000 0.147541 0.172131 0.303279 0.540984 0.696721 0.024590 0.065574 0.139344 0.500000 0.983607 0.491803 0.347107 0.032787 0.303279 0.549180 0.762295 0.959016 0.401639 0.278689 0.319672 0.247934 0.247934 0.173554 0.016393 0.278689 0.475410 0.713115 0.942623 0.024590 0.221311 0.500000 0.696721 1.000000 0.008197 0.147541 0.467213 0.754098 0.983607 0.286885 0.327869 0.385246 0.214876 0.173554 0.297521 0.008197 0.204918 0.532787 0.754098 0.959016 0.016393 0.237705 0.459016 0.713115 0.926230 0.024590 0.221311 0.450820 0.803279 1.000000 0.311475 0.368852 0.319672 0.256198 0.206612 0.214876 0.016393 0.237705 0.442623 0.688525 0.942623 0.024590 0.262295 0.508197 0.762295 1.000000 0.008197 0.147541 0.467213 0.754098 0.983607 0.114754 0.073770 0.049180 0.032787 0.032787 0.032787 0.081967 0.040984 0.098361 0.057377 0.049180 0.049180 0.016393 0.040984 0.040984 0.073770 0.049180 0.024590 0.032787 0.008197 
>YBL045c
0.323851 0.367615 0.308534 0.239035 0.212719 0.239035 0.006565 0.280088 0.505470 0.765864 0.997812 0.008753 0.196937 0.450766 0.711160 0.991247 0.002188 0.273523 0.536105 0.768053 1.000000 0.409190 0.164114 0.426696 0.052632 0.092105 0.000000 0.002188 0.196937 0.494530 0.678337 1.000000 0.065646 0.203501 0.542670 0.693654 0.956236 0.028446 0.317287 0.490153 0.809628 0.984683 0.606127 0.372807 0.004376 0.277899 0.551422 0.759300 0.991247 0.380744 0.409190 0.210066 0.328947 0.157895 0.171053 0.008753 0.214442 0.485777 0.728665 0.991247 0.004376 0.264770 0.474836 0.737418 0.980306 0.002188 0.299781 0.564551 0.772429 1.000000 0.326039 0.330416 0.343545 0.225877 0.243421 0.212719 0.002188 0.273523 0.549234 0.768053 1.000000 0.008753 0.188184 0.446389 0.713348 0.991247 0.006565 0.280088 0.490153 0.748359 0.997812 0.350109 0.439825 0.210066 0.313596 0.146930 0.182018 0.008753 0.214442 0.485777 0.746171 0.991247 0.004376 0.264770 0.474836 0.700219 0.980306 0.002188 0.299781 0.564551 0.772429 1.000000 0.032823 0.067834 0.054705 0.048140 0.041575 0.078775 0.056893 0.083151 0.102845 0.059081 0.028446 0.019694 0.017505 0.002188 0.072210 0.115974 0.045952 0.013129 0.043764 0.015317 
>YBL046w
0.462585 0.281179 0.256236 0.202273 0.195455 0.152273 0.015873 0.328798 0.539683 0.707483 1.000000 0.004535 0.283447 0.634921 0.832200 0.997732 0.002268 0.170068 0.312925 0.544218 0.988662 0.637188 0.079365 0.283447 0.029545 0.061364 0.015909 0.002268 0.390023 0.591837 0.768707 1.000000 0.081633 0.226757 0.301587 0.820862 0.970522 0.038549 0.151927 0.265306 0.430839 0.952381 0.371882 0.345455 0.011338 0.179138 0.351474 0.650794 0.979592 0.392290 0.371882 0.235828 0.270455 0.170455 0.170455 0.004535 0.317460 0.600907 0.780045 0.997732 0.013605 0.206349 0.430839 0.707483 0.988662 0.002268 0.244898 0.433107 0.732426 1.000000 0.281179 0.240363 0.478458 0.147727 0.231818 0.165909 0.002268 0.179138 0.351474 0.575964 0.988662 0.004535 0.301587 0.662132 0.834467 0.997732 0.015873 0.319728 0.539683 0.709751 1.000000 0.344671 0.419501 0.235828 0.284091 0.143182 0.197727 0.004535 0.340136 0.609977 0.784580 0.997732 0.013605 0.210884 0.424036 0.721088 0.988662 0.002268 0.244898 0.433107 0.732426 1.000000 0.038549 0.072562 0.106576 0.138322 0.027211 0.079365 0.047619 0.024943 0.081633 0.052154 0.034014 0.015873 0.024943 0.013605 0.038549 0.070295 0.049887 0.036281 0.040816 0.006803 
>YBL047c
0.375815 0.395366 0.228820 0.260145 0.186232 0.194203 0.005069 0.323678 0.556119 0.747285 0.998552 0.001448 0.235337 0.439537 0.767560 1.000000 0.000724 0.197683 0.440985 0.716872 0.997828 0.598117 0.020275 0.381608 0.013043 0.055072 0.001449 0.000724 0.255612 0.416365 0.801593 1.000000 0.002896 0.670529 0.784938 0.832730 0.848660 0.008689 0.240406 0.503983 0.602462 0.997828 0.301231 0.388406 0.001448 0.165098 0.367125 0.728458 0.997828 0.430847 0.411296 0.157857 0.342754 0.140580 0.128261 0.001448 0.233888 0.456915 0.774077 1.000000 0.002896 0.271542 0.519189 0.734975 0.997828 0.000724 0.209993 0.477915 0.683563 0.996379 0.238957 0.370022 0.391021 0.186957 0.202174 0.251449 0.000724 0.197683 0.446054 0.713975 0.997828 0.001448 0.233164 0.434468 0.769008 1.000000 0.005069 0.320782 0.556119 0.748009 0.998552 0.370022 0.472122 0.157857 0.326087 0.125362 0.143478 0.001448 0.233164 0.495293 0.770456 1.000000 0.002896 0.267198 0.506155 0.743664 0.997828 0.000724 0.209993 0.477915 0.683563 0.996379 0.027516 0.051412 0.080377 0.058653 0.077480 0.080377 0.036930 0.090514 0.107169 0.076756 0.058653 0.015206 0.010138 0.002172 0.049964 0.084721 0.038378 0.014482 0.033309 0.005793 
>YBL048w
0.155340 0.262136 0.582524 0.058824 0.156863 0.294118 0.048544 0.281553 0.611650 0.786408 0.941748 0.106796 0.223301 0.524272 0.689320 0.980583 0.009709 0.233010 0.427184 0.776699 1.000000 0.213592 0.174757 0.611650 0.039216 0.058824 0.039216 0.009709 0.077670 0.689320 0.941748 1.000000 0.029126 0.174757 0.718447 0.757282 0.864078 0.087379 0.262136 0.417476 0.572816 0.922330 0.689320 0.294118 0.029126 0.213592 0.495146 0.728155 0.970874 0.223301 0.436893 0.339806 0.186275 0.166667 0.313725 0.106796 0.223301 0.504854 0.737864 0.980583 0.019417 0.194175 0.388350 0.718447 1.000000 0.009709 0.291262 0.543689 0.728155 0.990291 0.660194 0.184466 0.155340 0.274510 0.176471 0.039216 0.009709 0.242718 0.466019 0.747573 1.000000 0.106796 0.184466 0.436893 0.679612 0.980583 0.048544 0.281553 0.611650 0.786408 0.941748 0.155340 0.504854 0.339806 0.166667 0.127451 0.352941 0.116505 0.223301 0.436893 0.650485 0.786408 0.019417 0.213592 0.446602 0.805825 1.000000 0.009709 0.291262 0.543689 0.728155 0.990291 0.029126 0.038835 0.019417 0.009709 0.019417 0.038835 0.009709 0.019417 0.106796 0.009709 0.038835 0.000000 0.077670 0.029126 0.106796 0.126214 0.126214 0.019417 0.135922 0.038835 
>YBL049w
0.333333 0.347826 0.318841 0.211679 0.211679 0.204380 0.028986 0.268116 0.601449 0.826087 0.985507 0.014493 0.144928 0.362319 0.514493 1.000000 0.007246 0.297101 0.572464 0.746377 0.992754 0.557971 0.318841 0.123188 0.109489 0.080292 0.036496 0.007246 0.188406 0.391304 0.673913 1.000000 0.028986 0.507246 0.652174 0.804348 0.985507 0.202899 0.268116 0.413043 0.615942 0.739130 0.514493 0.481752 0.021739 0.253623 0.550725 0.717391 0.992754 0.340580 0.347826 0.311594 0.189781 0.226277 0.189781 0.014493 0.181159 0.398551 0.702899 1.000000 0.021739 0.268116 0.572464 0.782609 0.971014 0.007246 0.239130 0.463768 0.746377 0.985507 0.384058 0.246377 0.369565 0.167883 0.306569 0.145985 0.007246 0.289855 0.550725 0.731884 0.992754 0.014493 0.130435 0.362319 0.500000 1.000000 0.028986 0.260870 0.565217 0.804348 0.985507 0.268116 0.420290 0.311594 0.189781 0.167883 0.248175 0.014493 0.181159 0.398551 0.659420 1.000000 0.021739 0.253623 0.572464 0.775362 0.992754 0.007246 0.239130 0.463768 0.746377 0.985507 0.065217 0.079710 0.036232 0.043478 0.050725 0.057971 0.057971 0.007246 0.115942 0.043478 0.021739 0.036232 0.065217 0.050725 0.057971 0.079710 0.065217 0.021739 0.028986 0.014493 
>YBL050w
0.393836 0.325342 0.280822 0.285223 0.257732 0.168385 0.010274 0.253425 0.517123 0.801370 0.993151 0.006849 0.215753 0.452055 0.674658 0.969178 0.003425 0.277397 0.534247 0.739726 1.000000 0.205479 0.003425 0.791096 0.006873 0.096220 0.000000 0.003425 0.102740 0.448630 0.794521 1.000000 0.082192 0.082192 0.082192 0.082192 0.082192 0.013699 0.273973 0.506849 0.736301 0.993151 0.503425 0.481100 0.013699 0.270548 0.523973 0.719178 0.972603 0.383562 0.366438 0.250000 0.295533 0.164948 0.175258 0.006849 0.222603 0.493151 0.729452 0.993151 0.017123 0.280822 0.527397 0.811644 1.000000 0.003425 0.212329 0.452055 0.688356 0.962329 0.318493 0.277397 0.404110 0.158076 0.295533 0.247423 0.003425 0.273973 0.503425 0.708904 1.000000 0.006849 0.202055 0.424658 0.705479 0.969178 0.010274 0.256849 0.517123 0.801370 0.993151 0.349315 0.400685 0.250000 0.288660 0.137457 0.202749 0.006849 0.222603 0.493151 0.729452 0.993151 0.013699 0.280822 0.527397 0.787671 1.000000 0.003425 0.212329 0.452055 0.688356 0.962329 0.034247 0.092466 0.082192 0.082192 0.051370 0.051370 0.058219 0.102740 0.085616 0.020548 0.010274 0.010274 0.037671 0.023973 0.030822 0.102740 0.047945 0.013699 0.051370 0.010274 
>YBL051c
0.374251 0.405689 0.220060 0.278861 0.173913 0.164918 0.002994 0.223054 0.450599 0.732036 0.997006 0.004491 0.303892 0.570359 0.775449 0.982036 0.001497 0.226048 0.470060 0.702096 1.000000 0.637725 0.088323 0.273952 0.049475 0.076462 0.004498 0.001497 0.241018 0.519461 0.784431 1.000000 0.073353 0.176647 0.321856 0.642216 0.859281 0.019461 0.278443 0.511976 0.738024 0.991018 0.362275 0.377811 0.008982 0.320359 0.501497 0.714072 0.986527 0.387725 0.446108 0.166168 0.356822 0.110945 0.128936 0.004491 0.250000 0.528443 0.763473 0.985030 0.002994 0.238024 0.495509 0.748503 0.998503 0.001497 0.244012 0.479042 0.702096 1.000000 0.251497 0.350299 0.398204 0.169415 0.205397 0.265367 0.001497 0.244012 0.486527 0.739521 1.000000 0.004491 0.290419 0.570359 0.766467 0.982036 0.002994 0.232036 0.473054 0.736527 0.997006 0.329341 0.504491 0.166168 0.334333 0.097451 0.142429 0.004491 0.250000 0.528443 0.761976 0.985030 0.002994 0.247006 0.505988 0.750000 0.998503 0.001497 0.244012 0.479042 0.702096 1.000000 0.031437 0.032934 0.044910 0.035928 0.100299 0.128743 0.040419 0.064371 0.134731 0.053892 0.056886 0.023952 0.031437 0.001497 0.025449 0.088323 0.058383 0.022455 0.022455 0.001497 
>YBL052c
0.418773 0.304452 0.276775 0.233735 0.206024 0.190361 0.007220 0.264741 0.549940 0.819495 1.000000 0.002407 0.234657 0.483755 0.720818 0.991576 0.001203 0.244284 0.453670 0.669073 0.993983 0.558363 0.193742 0.247894 0.081928 0.062651 0.004819 0.001203 0.244284 0.496992 0.788207 1.000000 0.039711 0.234657 0.454874 0.648616 0.993983 0.016847 0.299639 0.554753 0.665463 0.986763 0.427196 0.327711 0.003610 0.210590 0.444043 0.629362 0.993983 0.326113 0.388688 0.285199 0.263855 0.179518 0.207229 0.002407 0.227437 0.516245 0.779783 0.997593 0.003610 0.263538 0.510229 0.772563 1.000000 0.001203 0.252708 0.469314 0.683514 0.989170 0.318893 0.241877 0.439230 0.169880 0.253012 0.191566 0.001203 0.263538 0.454874 0.665463 0.993983 0.002407 0.211793 0.483755 0.718412 0.991576 0.007220 0.271961 0.549940 0.814681 1.000000 0.275572 0.439230 0.285199 0.243373 0.144578 0.242169 0.002407 0.223827 0.541516 0.793020 0.997593 0.003610 0.267148 0.500602 0.742479 1.000000 0.001203 0.252708 0.469314 0.683514 0.989170 0.066185 0.083032 0.090253 0.070999 0.028881 0.079422 0.036101 0.028881 0.080626 0.058965 0.037304 0.020457 0.042118 0.013237 0.040915 0.079422 0.069795 0.014440 0.044525 0.014440 
>YBL054w
0.358095 0.420952 0.220952 0.259542 0.156489 0.190840 0.009524 0.297143 0.531429 0.813333 0.996190 0.003810 0.230476 0.455238 0.672381 0.988571 0.001905 0.236190 0.512381 0.767619 1.000000 0.693333 0.118095 0.188571 0.059160 0.066794 0.009542 0.001905 0.278095 0.489524 0.718095 1.000000 0.015238 0.251429 0.521905 0.668571 0.929524 0.045714 0.177143 0.500952 0.836190 0.996190 0.375238 0.343511 0.005714 0.251429 0.521905 0.731429 0.992381 0.403810 0.335238 0.260952 0.272901 0.227099 0.154580 0.003810 0.253333 0.455238 0.702857 0.988571 0.005714 0.255238 0.520000 0.805714 0.998095 0.001905 0.224762 0.523810 0.723810 1.000000 0.240000 0.348571 0.411429 0.166031 0.192748 0.276718 0.001905 0.251429 0.518095 0.754286 1.000000 0.003810 0.232381 0.443810 0.659048 0.988571 0.009524 0.253333 0.531429 0.786667 0.996190 0.331429 0.407619 0.260952 0.265267 0.185115 0.196565 0.003810 0.247619 0.455238 0.706667 0.988571 0.005714 0.255238 0.518095 0.796190 0.998095 0.001905 0.224762 0.523810 0.723810 1.000000 0.053333 0.080000 0.059048 0.049524 0.032381 0.083810 0.028571 0.045714 0.137143 0.070476 0.066667 0.053333 0.019048 0.005714 0.038095 0.064762 0.057143 0.017143 0.030476 0.007619 
>YBL055c
0.325359 0.363636 0.311005 0.201439 0.227818 0.225420 0.016746 0.308612 0.519139 0.794258 1.000000 0.007177 0.200957 0.418660 0.674641 0.997608 0.002392 0.255981 0.538278 0.751196 0.995215 0.459330 0.114833 0.425837 0.043165 0.124700 0.004796 0.002392 0.246411 0.526316 0.734450 1.000000 0.007177 0.191388 0.433014 0.657895 0.777512 0.031100 0.287081 0.497608 0.834928 0.995215 0.543062 0.393285 0.007177 0.251196 0.500000 0.724880 0.995215 0.375598 0.358852 0.265550 0.232614 0.184652 0.206235 0.007177 0.232057 0.440191 0.703349 0.997608 0.009569 0.265550 0.533493 0.765550 1.000000 0.002392 0.239234 0.488038 0.753589 0.995215 0.356459 0.291866 0.351675 0.201439 0.290168 0.182254 0.002392 0.244019 0.511962 0.748804 0.995215 0.007177 0.208134 0.425837 0.700957 0.997608 0.016746 0.294258 0.514354 0.777512 1.000000 0.315789 0.418660 0.265550 0.247002 0.155875 0.235012 0.007177 0.220096 0.440191 0.681818 0.997608 0.009569 0.265550 0.521531 0.765550 1.000000 0.002392 0.239234 0.488038 0.753589 0.995215 0.033493 0.081340 0.062201 0.062201 0.043062 0.043062 0.043062 0.066986 0.095694 0.047847 0.038278 0.026316 0.045455 0.021531 0.055024 0.102871 0.052632 0.021531 0.047847 0.009569 
>YBL056w
0.352564 0.344017 0.303419 0.237687 0.201285 0.199143 0.006410 0.301282 0.606838 0.779915 1.000000 0.004274 0.250000 0.476496 0.792735 0.987179 0.002137 0.207265 0.448718 0.626068 0.997863 0.544872 0.190171 0.264957 0.072805 0.051392 0.000000 0.002137 0.277778 0.602564 0.809829 1.000000 0.047009 0.260684 0.326923 0.485043 0.995726 0.141026 0.220085 0.534188 0.662393 0.912393 0.472222 0.286938 0.010684 0.237179 0.412393 0.623932 0.991453 0.440171 0.361111 0.198718 0.310493 0.173448 0.132762 0.004274 0.258547 0.517094 0.788462 0.987179 0.006410 0.264957 0.491453 0.739316 1.000000 0.002137 0.188034 0.423077 0.690171 0.989316 0.314103 0.307692 0.378205 0.188437 0.224839 0.226981 0.002137 0.207265 0.452991 0.628205 0.997863 0.004274 0.258547 0.514957 0.799145 0.987179 0.006410 0.279915 0.559829 0.773504 1.000000 0.388889 0.412393 0.198718 0.316916 0.162741 0.143469 0.004274 0.260684 0.542735 0.792735 0.987179 0.006410 0.256410 0.489316 0.722222 1.000000 0.002137 0.188034 0.423077 0.690171 0.989316 0.032051 0.055556 0.079060 0.102564 0.029915 0.053419 0.070513 0.057692 0.108974 0.049145 0.021368 0.025641 0.010684 0.029915 0.042735 0.089744 0.066239 0.027778 0.040598 0.006410 
>YBL057c
0.294393 0.425234 0.280374 0.234742 0.159624 0.267606 0.037383 0.299065 0.415888 0.691589 0.990654 0.014019 0.196262 0.528037 0.785047 1.000000 0.004673 0.163551 0.518692 0.752336 0.995327 0.415888 0.140187 0.443925 0.046948 0.093897 0.009390 0.004673 0.317757 0.476636 0.808411 1.000000 0.079439 0.443925 0.705607 0.827103 0.915888 0.014019 0.140187 0.509346 0.658879 0.967290 0.551402 0.281690 0.009346 0.149533 0.509346 0.747664 0.985981 0.462617 0.327103 0.210280 0.352113 0.192488 0.145540 0.014019 0.224299 0.523364 0.775701 0.981308 0.009346 0.285047 0.462617 0.761682 0.995327 0.004673 0.205607 0.495327 0.668224 1.000000 0.303738 0.383178 0.313084 0.258216 0.192488 0.211268 0.004673 0.154206 0.518692 0.752336 1.000000 0.014019 0.196262 0.523364 0.785047 0.976636 0.037383 0.299065 0.434579 0.691589 0.990654 0.415888 0.373832 0.210280 0.361502 0.173709 0.164319 0.014019 0.214953 0.481308 0.775701 0.981308 0.009346 0.317757 0.518692 0.761682 0.995327 0.004673 0.205607 0.495327 0.668224 1.000000 0.032710 0.065421 0.065421 0.060748 0.032710 0.037383 0.060748 0.121495 0.088785 0.084112 0.028037 0.018692 0.023364 0.018692 0.037383 0.088785 0.065421 0.037383 0.023364 0.009346 
>YBL058w
0.399527 0.392435 0.208038 0.315166 0.163507 0.184834 0.007092 0.241135 0.472813 0.713948 0.995272 0.004728 0.250591 0.484634 0.751773 1.000000 0.002364 0.297872 0.560284 0.770686 0.997636 0.678487 0.127660 0.193853 0.054502 0.059242 0.007109 0.002364 0.250591 0.479905 0.723404 1.000000 0.241135 0.432624 0.678487 0.853428 0.992908 0.014184 0.066194 0.406619 0.650118 0.995272 0.375887 0.355450 0.009456 0.304965 0.557920 0.801418 0.990544 0.430260 0.349882 0.219858 0.303318 0.168246 0.146919 0.004728 0.264775 0.477541 0.747045 1.000000 0.007092 0.198582 0.531915 0.770686 0.992908 0.002364 0.243499 0.482270 0.702128 0.997636 0.236407 0.349882 0.413712 0.168246 0.199052 0.284360 0.002364 0.238771 0.567376 0.770686 0.997636 0.004728 0.257683 0.479905 0.751773 1.000000 0.007092 0.231678 0.470449 0.730496 0.995272 0.368794 0.411348 0.219858 0.315166 0.142180 0.172986 0.004728 0.264775 0.451537 0.725768 1.000000 0.007092 0.224586 0.550827 0.777778 0.992908 0.002364 0.243499 0.482270 0.702128 0.997636 0.059102 0.054374 0.082742 0.075650 0.059102 0.068558 0.078014 0.066194 0.089835 0.059102 0.056738 0.014184 0.028369 0.004728 0.047281 0.066194 0.026005 0.016548 0.040189 0.007092 
>YBL059c-a
0.522936 0.229358 0.247706 0.240741 0.231481 0.111111 0.036697 0.339450 0.559633 0.761468 1.000000 0.018349 0.174312 0.458716 0.752294 0.990826 0.009174 0.146789 0.330275 0.587156 0.834862 0.146789 0.000000 0.853211 0.000000 0.055556 0.000000 0.009174 0.036697 0.926606 0.963303 1.000000 0 0 0 0 0 0.045872 0.247706 0.467890 0.688073 0.908257 0.284404 0.351852 0.045872 0.155963 0.321101 0.669725 0.880734 0.275229 0.394495 0.330275 0.259259 0.166667 0.203704 0.027523 0.192661 0.467890 0.779817 0.990826 0.036697 0.247706 0.486239 0.724771 0.981651 0.009174 0.238532 0.504587 0.678899 1.000000 0.284404 0.165138 0.550459 0.101852 0.296296 0.212963 0.009174 0.155963 0.330275 0.633028 0.871560 0.027523 0.174312 0.532110 0.779817 0.990826 0.018349 0.275229 0.522936 0.761468 1.000000 0.229358 0.440367 0.330275 0.222222 0.129630 0.240741 0.064220 0.311927 0.568807 0.816514 0.990826 0.027523 0.229358 0.449541 0.715596 0.981651 0.009174 0.238532 0.504587 0.678899 1.000000 0.064220 0.155963 0.119266 0.073394 0.036697 0.073394 0.018349 0.082569 0.045872 0.009174 0.009174 0.027523 0.036697 0.036697 0.018349 0.082569 0.064220 0.009174 0.027523 0.009174 
>YBL059w
0.336788 0.316062 0.347150 0.187500 0.213542 0.260417 0.020725 0.181347 0.373057 0.803109 1.000000 0.025907 0.352332 0.564767 0.699482 0.984456 0.005181 0.202073 0.445596 0.735751 0.994819 0.341969 0.108808 0.549223 0.041667 0.072917 0.000000 0.005181 0.186528 0.559585 0.844560 1.000000 0.077720 0.098446 0.165803 0.212435 0.870466 0.010363 0.357513 0.523316 0.704663 0.958549 0.523316 0.343750 0.025907 0.259067 0.507772 0.720207 0.994819 0.347150 0.347150 0.305699 0.276042 0.234375 0.171875 0.020725 0.310881 0.564767 0.725389 0.994819 0.010363 0.202073 0.507772 0.803109 0.989637 0.005181 0.186528 0.378238 0.694301 1.000000 0.357513 0.284974 0.357513 0.260417 0.234375 0.177083 0.005181 0.207254 0.445596 0.715026 0.994819 0.025907 0.367876 0.575130 0.709845 0.984456 0.020725 0.181347 0.373057 0.803109 1.000000 0.305699 0.388601 0.305699 0.260417 0.197917 0.208333 0.020725 0.316062 0.575130 0.720207 0.984456 0.010363 0.202073 0.502591 0.803109 0.994819 0.005181 0.186528 0.378238 0.694301 1.000000 0.072539 0.082902 0.036269 0.041451 0.046632 0.056995 0.036269 0.046632 0.077720 0.103627 0.020725 0.020725 0.010363 0.020725 0.056995 0.077720 0.072539 0.041451 0.062176 0.015544 
>YBL060w
0.360990 0.331878 0.307132 0.221574 0.221574 0.201166 0.008734 0.264920 0.515284 0.762737 0.998544 0.004367 0.209607 0.455604 0.692868 0.995633 0.001456 0.257642 0.522562 0.787482 1.000000 0.509461 0.103348 0.387191 0.046647 0.081633 0.008746 0.001456 0.155750 0.448326 0.649199 1.000000 0.046579 0.465793 0.631732 0.764192 0.934498 0.029112 0.244541 0.528384 0.866084 0.991266 0.464338 0.434402 0.007278 0.275109 0.521106 0.787482 0.991266 0.339156 0.397380 0.263464 0.255102 0.185131 0.208455 0.002911 0.202329 0.459971 0.685590 0.995633 0.007278 0.240175 0.468705 0.768559 0.998544 0.001456 0.314410 0.553130 0.784571 1.000000 0.342067 0.275109 0.382824 0.186589 0.259475 0.195335 0.001456 0.260553 0.522562 0.790393 1.000000 0.004367 0.202329 0.451237 0.685590 0.995633 0.008734 0.264920 0.505095 0.758370 0.998544 0.299854 0.436681 0.263464 0.252187 0.161808 0.231778 0.004367 0.192140 0.471616 0.685590 0.995633 0.002911 0.238719 0.465793 0.765648 0.998544 0.001456 0.314410 0.553130 0.784571 1.000000 0.034934 0.084425 0.080058 0.052402 0.029112 0.080058 0.034934 0.043668 0.112082 0.056769 0.027656 0.021834 0.034934 0.011645 0.048035 0.096070 0.064047 0.026201 0.045124 0.016012 
>YBL061c
0.354885 0.409483 0.235632 0.270504 0.158273 0.218705 0.008621 0.227011 0.481322 0.783046 0.994253 0.002874 0.248563 0.502874 0.724138 0.987069 0.001437 0.264368 0.501437 0.705460 1.000000 0.452586 0.018678 0.528736 0.017266 0.097842 0.000000 0.001437 0.156609 0.416667 0.765805 1.000000 0.027299 0.048851 0.146552 0.841954 0.998563 0.015805 0.334770 0.538793 0.732759 0.974138 0.521552 0.405755 0.014368 0.280172 0.502874 0.727011 0.995690 0.403736 0.343391 0.252874 0.292086 0.182734 0.188489 0.002874 0.239943 0.511494 0.750000 0.995690 0.008621 0.214080 0.429598 0.701149 0.998563 0.001437 0.298851 0.527299 0.770115 1.000000 0.272989 0.349138 0.377874 0.197122 0.197122 0.248921 0.001437 0.281609 0.504310 0.688218 1.000000 0.002874 0.239943 0.511494 0.760057 0.987069 0.008621 0.215517 0.472701 0.775862 0.994253 0.362069 0.385057 0.252874 0.287770 0.166906 0.204317 0.002874 0.252874 0.520115 0.762931 0.994253 0.007184 0.196839 0.441092 0.701149 0.998563 0.001437 0.298851 0.527299 0.770115 1.000000 0.043103 0.086207 0.054598 0.048851 0.051724 0.070402 0.061782 0.084770 0.114943 0.051724 0.035920 0.022989 0.037356 0.005747 0.041667 0.093391 0.031609 0.024425 0.031609 0.007184 
>YBL063w
0.403240 0.310531 0.286229 0.235135 0.237838 0.177477 0.002700 0.281728 0.510351 0.743474 1.000000 0.001800 0.175518 0.449145 0.747075 0.999100 0.000900 0.262826 0.509451 0.753375 0.998200 0.326733 0.092709 0.580558 0.033333 0.056757 0.002703 0.000900 0.139514 0.306031 0.879388 1.000000 0.047705 0.121512 0.216922 0.281728 0.903690 0.008101 0.426643 0.574257 0.719172 0.998200 0.396040 0.405405 0.004500 0.228623 0.435644 0.715572 0.993699 0.333933 0.458146 0.207921 0.298198 0.150450 0.200000 0.001800 0.198920 0.486949 0.762376 0.991899 0.005401 0.290729 0.512151 0.746175 1.000000 0.000900 0.225023 0.467147 0.709271 0.999100 0.306931 0.265527 0.427543 0.167568 0.269369 0.218018 0.000900 0.256526 0.495950 0.746175 0.998200 0.001800 0.179118 0.455446 0.760576 0.988299 0.002700 0.274527 0.507651 0.738974 1.000000 0.293429 0.498650 0.207921 0.282883 0.135135 0.215315 0.001800 0.198920 0.462646 0.734473 0.991899 0.005401 0.288929 0.519352 0.769577 1.000000 0.000900 0.225023 0.467147 0.709271 0.999100 0.036904 0.077408 0.067507 0.054005 0.062106 0.105311 0.032403 0.036904 0.104410 0.065707 0.026103 0.024302 0.020702 0.014401 0.034203 0.100810 0.088209 0.018002 0.029703 0.000900 
>YBL064c
0.344828 0.329502 0.325670 0.238462 0.257692 0.223077 0.015326 0.233716 0.505747 0.762452 1.000000 0.011494 0.214559 0.436782 0.743295 0.996169 0.003831 0.279693 0.509579 0.720307 0.984674 0.490421 0.183908 0.325670 0.096154 0.073077 0.003846 0.003831 0.191571 0.540230 0.758621 1.000000 0.206897 0.302682 0.547893 0.720307 0.984674 0.011494 0.272031 0.459770 0.770115 0.934866 0.574713 0.330769 0.007663 0.291188 0.463602 0.720307 0.984674 0.386973 0.352490 0.260536 0.261538 0.215385 0.207692 0.011494 0.226054 0.436782 0.743295 0.996169 0.019157 0.302682 0.528736 0.777778 0.977011 0.003831 0.252874 0.482759 0.708812 1.000000 0.344828 0.298851 0.356322 0.215385 0.273077 0.238462 0.003831 0.275862 0.521073 0.724138 0.984674 0.011494 0.210728 0.436782 0.747126 0.996169 0.015326 0.233716 0.494253 0.758621 1.000000 0.318008 0.421456 0.260536 0.253846 0.176923 0.246154 0.011494 0.229885 0.444444 0.743295 0.996169 0.019157 0.260536 0.521073 0.777778 0.977011 0.003831 0.252874 0.482759 0.708812 1.000000 0.042146 0.095785 0.042146 0.076628 0.042146 0.045977 0.042146 0.065134 0.065134 0.068966 0.057471 0.011494 0.019157 0.011494 0.080460 0.065134 0.076628 0.007663 0.068966 0.015326 
>YBL066c
0.317944 0.409408 0.272648 0.246731 0.150828 0.241500 0.002613 0.207317 0.481707 0.755226 0.998258 0.006969 0.247387 0.503484 0.763066 0.999129 0.000871 0.300523 0.511324 0.701220 1.000000 0.590592 0.080139 0.329268 0.052310 0.057541 0.001744 0.000871 0.211672 0.470383 0.825784 1.000000 0.033972 0.276132 0.706446 0.815331 0.982578 0.013937 0.346690 0.515679 0.621080 0.996516 0.485192 0.345248 0.012195 0.332753 0.525261 0.743031 0.996516 0.418118 0.364983 0.216899 0.316478 0.168265 0.159547 0.003484 0.244774 0.493902 0.763937 0.999129 0.001742 0.256098 0.512195 0.750871 0.998258 0.000871 0.258711 0.488676 0.706446 1.000000 0.299652 0.352787 0.347561 0.214473 0.188317 0.235397 0.000871 0.312718 0.521777 0.706446 1.000000 0.006969 0.248258 0.504355 0.772648 0.999129 0.002613 0.192509 0.475610 0.752613 0.998258 0.337108 0.445993 0.216899 0.303400 0.132520 0.195292 0.003484 0.253484 0.510453 0.777003 0.999129 0.001742 0.234321 0.485192 0.742160 0.998258 0.000871 0.258711 0.488676 0.706446 1.000000 0.039199 0.054007 0.041812 0.051394 0.049652 0.081882 0.038328 0.054007 0.111498 0.081882 0.067073 0.029617 0.027003 0.013937 0.043554 0.098432 0.049652 0.019164 0.039199 0.008711 
>YBL067c
0.376171 0.357430 0.266399 0.256032 0.197051 0.182306 0.004016 0.250335 0.506024 0.755020 0.998661 0.009371 0.240964 0.448461 0.710843 1.000000 0.001339 0.228916 0.559572 0.773762 0.995984 0.606426 0.151272 0.242303 0.063003 0.065684 0.004021 0.001339 0.250335 0.420348 0.729585 1.000000 0.005355 0.188755 0.736278 0.813922 0.995984 0.032129 0.262383 0.536814 0.635877 0.982597 0.431058 0.335121 0.006693 0.228916 0.504685 0.744311 0.995984 0.393574 0.368139 0.238286 0.296247 0.166220 0.164879 0.009371 0.242303 0.457831 0.712182 1.000000 0.002677 0.227577 0.535475 0.742972 0.979920 0.001339 0.250335 0.531459 0.781794 0.998661 0.297189 0.306560 0.396252 0.171582 0.229223 0.229223 0.001339 0.219545 0.559572 0.775100 0.995984 0.009371 0.251673 0.431058 0.663989 1.000000 0.004016 0.254351 0.515395 0.759036 0.998661 0.319946 0.441767 0.238286 0.284182 0.132708 0.198391 0.009371 0.234270 0.467202 0.712182 1.000000 0.002677 0.247657 0.510040 0.736278 0.979920 0.001339 0.250335 0.531459 0.781794 0.998661 0.037483 0.087015 0.073628 0.065596 0.030790 0.081660 0.050870 0.037483 0.113788 0.052209 0.052209 0.020080 0.030790 0.021419 0.048193 0.078983 0.054886 0.014726 0.044177 0.004016 
>YBL068w
0.314985 0.360856 0.324159 0.214724 0.190184 0.263804 0.006116 0.220183 0.477064 0.691131 0.966361 0.009174 0.269113 0.492355 0.770642 0.996942 0.003058 0.253823 0.510703 0.749235 1.000000 0.428135 0.226300 0.345566 0.076687 0.082822 0.003067 0.003058 0.214067 0.461774 0.715596 1.000000 0.042813 0.171254 0.550459 0.703364 0.917431 0.018349 0.281346 0.507645 0.758410 0.984709 0.605505 0.361963 0.027523 0.269113 0.486239 0.730887 0.984709 0.397554 0.394495 0.207951 0.346626 0.174847 0.177914 0.009174 0.284404 0.535168 0.752294 0.996942 0.006116 0.220183 0.464832 0.706422 1.000000 0.003058 0.290520 0.507645 0.743119 0.990826 0.345566 0.308869 0.345566 0.239264 0.220859 0.220859 0.003058 0.250765 0.498471 0.740061 1.000000 0.009174 0.281346 0.495413 0.770642 0.996942 0.006116 0.226300 0.477064 0.709480 0.990826 0.345566 0.446483 0.207951 0.343558 0.165644 0.187117 0.009174 0.281346 0.529052 0.746177 0.993884 0.006116 0.226300 0.477064 0.740061 1.000000 0.003058 0.290520 0.507645 0.743119 0.990826 0.045872 0.061162 0.051988 0.073394 0.033639 0.048930 0.048930 0.097859 0.070336 0.055046 0.036697 0.030581 0.021407 0.015291 0.073394 0.097859 0.088685 0.021407 0.027523 0.000000 
>YBL069w
0.321678 0.361305 0.317016 0.217290 0.207944 0.193925 0.006993 0.226107 0.531469 0.780886 0.997669 0.004662 0.251748 0.480186 0.750583 0.979021 0.002331 0.240093 0.491841 0.708625 1.000000 0.452214 0.212121 0.335664 0.079439 0.065421 0.000000 0.002331 0.167832 0.361305 0.687646 1.000000 0.032634 0.191142 0.358974 0.701632 0.993007 0.004662 0.435897 0.624709 0.818182 0.967366 0.624709 0.345794 0.011655 0.282051 0.503497 0.729604 0.993007 0.354312 0.368298 0.277389 0.245327 0.198598 0.203271 0.004662 0.256410 0.489510 0.759907 0.979021 0.011655 0.254079 0.470862 0.682984 0.995338 0.002331 0.216783 0.522145 0.797203 1.000000 0.372960 0.279720 0.347319 0.186916 0.271028 0.182243 0.002331 0.263403 0.498834 0.736597 1.000000 0.004662 0.237762 0.466200 0.745921 0.979021 0.006993 0.226107 0.526807 0.776224 0.997669 0.293706 0.428904 0.277389 0.238318 0.163551 0.238318 0.004662 0.282051 0.547786 0.766900 0.979021 0.011655 0.226107 0.449883 0.675991 0.995338 0.002331 0.216783 0.522145 0.797203 1.000000 0.027972 0.095571 0.051282 0.062937 0.027972 0.055944 0.067599 0.055944 0.069930 0.037296 0.048951 0.025641 0.055944 0.011655 0.081585 0.079254 0.072261 0.025641 0.034965 0.011655 
>YBL071w-a
0.317073 0.353659 0.329268 0.148148 0.222222 0.259259 0.060976 0.182927 0.439024 0.719512 0.926829 0.024390 0.280488 0.585366 0.865854 1.000000 0.012195 0.243902 0.463415 0.646341 0.951220 0.487805 0.353659 0.158537 0.111111 0.061728 0.012346 0.012195 0.231707 0.524390 0.853659 1.000000 0.073171 0.146341 0.365854 0.560976 0.707317 0.426829 0.451220 0.731707 0.768293 0.963415 0.390244 0.419753 0.048780 0.268293 0.500000 0.646341 0.951220 0.426829 0.341463 0.231707 0.283951 0.172840 0.185185 0.024390 0.292683 0.548780 0.780488 1.000000 0.073171 0.207317 0.512195 0.743902 0.951220 0.012195 0.170732 0.378049 0.646341 0.890244 0.390244 0.280488 0.329268 0.259259 0.271605 0.123457 0.012195 0.256098 0.463415 0.658537 0.951220 0.024390 0.268293 0.585366 0.902439 1.000000 0.060976 0.182927 0.439024 0.731707 0.926829 0.292683 0.475610 0.231707 0.259259 0.148148 0.209877 0.024390 0.268293 0.548780 0.780488 1.000000 0.073171 0.219512 0.512195 0.743902 0.951220 0.012195 0.170732 0.378049 0.646341 0.890244 0.012195 0.024390 0.146341 0.097561 0.024390 0.012195 0.036585 0.085366 0.036585 0.036585 0.085366 0.012195 0.060976 0.048780 0.048780 0.036585 0.073171 0.060976 0.060976 0.000000 
>YBL072c
0.380000 0.410000 0.210000 0.311558 0.175879 0.180905 0.025000 0.205000 0.470000 0.700000 1.000000 0.010000 0.250000 0.495000 0.750000 0.990000 0.005000 0.300000 0.510000 0.780000 0.980000 0.470000 0.245000 0.285000 0.080402 0.050251 0.000000 0.005000 0.160000 0.355000 0.635000 1.000000 0.210000 0.285000 0.405000 0.510000 0.920000 0.100000 0.560000 0.705000 0.790000 0.990000 0.410000 0.371859 0.015000 0.390000 0.545000 0.825000 0.980000 0.385000 0.290000 0.325000 0.241206 0.231156 0.150754 0.010000 0.250000 0.500000 0.770000 0.990000 0.015000 0.320000 0.515000 0.760000 0.980000 0.005000 0.155000 0.385000 0.685000 1.000000 0.240000 0.360000 0.400000 0.165829 0.201005 0.306533 0.005000 0.325000 0.520000 0.825000 0.980000 0.010000 0.250000 0.495000 0.750000 0.990000 0.025000 0.205000 0.460000 0.690000 1.000000 0.355000 0.320000 0.325000 0.261307 0.211055 0.170854 0.010000 0.240000 0.495000 0.750000 0.990000 0.015000 0.350000 0.520000 0.780000 0.980000 0.005000 0.155000 0.385000 0.685000 1.000000 0.110000 0.110000 0.070000 0.015000 0.035000 0.040000 0.080000 0.115000 0.085000 0.060000 0.020000 0.020000 0.030000 0.010000 0.040000 0.050000 0.055000 0.005000 0.035000 0.015000 
>YBL074c
0.374648 0.321127 0.304225 0.183616 0.223164 0.209040 0.005634 0.276056 0.476056 0.783099 0.997183 0.008451 0.200000 0.501408 0.718310 1.000000 0.002817 0.228169 0.509859 0.721127 0.985915 0.428169 0.169014 0.402817 0.084746 0.073446 0.000000 0.002817 0.183099 0.388732 0.608451 1.000000 0.008451 0.064789 0.194366 0.501408 0.991549 0.233803 0.540845 0.656338 0.763380 0.892958 0.509859 0.355932 0.008451 0.191549 0.563380 0.752113 0.991549 0.312676 0.383099 0.304225 0.223164 0.186441 0.251412 0.008451 0.214085 0.487324 0.738028 1.000000 0.005634 0.281690 0.532394 0.783099 0.994366 0.002817 0.222535 0.447887 0.684507 0.997183 0.366197 0.225352 0.408451 0.183616 0.288136 0.146893 0.002817 0.225352 0.515493 0.735211 0.991549 0.008451 0.214085 0.492958 0.712676 1.000000 0.005634 0.264789 0.476056 0.780282 0.997183 0.267606 0.428169 0.304225 0.209040 0.158192 0.279661 0.008451 0.242254 0.487324 0.718310 0.983099 0.005634 0.267606 0.532394 0.783099 1.000000 0.002817 0.222535 0.447887 0.684507 0.997183 0.030986 0.067606 0.081690 0.078873 0.045070 0.070423 0.047887 0.033803 0.070423 0.036620 0.036620 0.033803 0.061972 0.008451 0.045070 0.070423 0.070423 0.045070 0.053521 0.011268 
>YBL075c
0.357473 0.391371 0.251156 0.260802 0.185185 0.189815 0.004622 0.265023 0.505393 0.778120 1.000000 0.003082 0.240370 0.520801 0.764253 0.992296 0.001541 0.228043 0.468413 0.677966 0.998459 0.351310 0.266564 0.382126 0.091049 0.066358 0.007716 0.001541 0.224961 0.560863 0.762712 1.000000 0.007704 0.171032 0.428351 0.656394 0.996918 0.078582 0.352851 0.494607 0.822804 0.939908 0.522342 0.407407 0.006163 0.221880 0.466872 0.682589 0.998459 0.443760 0.346687 0.209553 0.313272 0.191358 0.128086 0.003082 0.248074 0.522342 0.773498 1.000000 0.007704 0.261941 0.510015 0.727273 0.998459 0.001541 0.203390 0.445300 0.719569 0.969183 0.271186 0.362096 0.366718 0.197531 0.202160 0.246914 0.001541 0.226502 0.468413 0.679507 0.998459 0.003082 0.248074 0.537750 0.770416 0.992296 0.004622 0.255778 0.497689 0.775039 1.000000 0.402157 0.388290 0.209553 0.305556 0.177469 0.141975 0.003082 0.251156 0.517720 0.776579 1.000000 0.007704 0.258860 0.514638 0.725732 0.998459 0.001541 0.203390 0.445300 0.719569 0.969183 0.052388 0.070878 0.075501 0.078582 0.030817 0.049307 0.081664 0.090909 0.067797 0.083205 0.038521 0.009245 0.020031 0.003082 0.060092 0.070878 0.060092 0.013867 0.041602 0.001541 
>YBL076c
0.341418 0.330224 0.328358 0.229692 0.222222 0.233427 0.002799 0.262127 0.519590 0.783582 0.999067 0.001866 0.208022 0.451493 0.722015 0.991604 0.000933 0.268657 0.520522 0.735075 1.000000 0.384328 0.186567 0.429104 0.085901 0.072829 0.003735 0.000933 0.253731 0.449627 0.732276 1.000000 0.036381 0.227612 0.388060 0.824627 0.999067 0.009328 0.309701 0.603545 0.763060 0.969216 0.569963 0.379085 0.003731 0.227612 0.473881 0.689366 0.997201 0.348881 0.372201 0.278918 0.268908 0.196078 0.202614 0.001866 0.220149 0.472015 0.740672 0.991604 0.002799 0.287313 0.548507 0.780784 1.000000 0.000933 0.226679 0.481343 0.717351 0.999067 0.372201 0.267724 0.360075 0.216620 0.276377 0.194211 0.000933 0.258396 0.513060 0.734142 1.000000 0.001866 0.209888 0.459888 0.724813 0.991604 0.002799 0.254664 0.511194 0.779851 0.999067 0.298507 0.422575 0.278918 0.257703 0.164332 0.234360 0.001866 0.223881 0.482276 0.762127 0.991604 0.002799 0.275187 0.521455 0.765858 1.000000 0.000933 0.226679 0.481343 0.717351 0.999067 0.042910 0.086754 0.073694 0.072761 0.022388 0.042910 0.053172 0.052239 0.066231 0.054104 0.041978 0.018657 0.043843 0.008396 0.078358 0.092351 0.062500 0.016791 0.049440 0.020522 
>YBL078c
0.367521 0.333333 0.299145 0.232759 0.137931 0.232759 0.017094 0.170940 0.367521 0.632479 1.000000 0.025641 0.256410 0.606838 0.794872 0.991453 0.008547 0.273504 0.521368 0.675214 0.982906 0.452991 0.222222 0.324786 0.103448 0.051724 0.017241 0.008547 0.341880 0.598291 0.752137 1.000000 0.239316 0.282051 0.444444 0.709402 0.940171 0.034188 0.119658 0.205128 0.555556 0.837607 0.478632 0.379310 0.042735 0.350427 0.547009 0.726496 0.940171 0.341880 0.324786 0.333333 0.267241 0.181034 0.267241 0.025641 0.282051 0.495726 0.760684 0.991453 0.068376 0.273504 0.504274 0.683761 0.965812 0.008547 0.128205 0.410256 0.675214 1.000000 0.350427 0.273504 0.376068 0.206897 0.163793 0.189655 0.008547 0.282051 0.529915 0.683761 0.982906 0.025641 0.256410 0.606838 0.760684 0.991453 0.017094 0.196581 0.384615 0.692308 1.000000 0.264957 0.401709 0.333333 0.198276 0.163793 0.284483 0.025641 0.196581 0.495726 0.794872 0.991453 0.068376 0.273504 0.487179 0.683761 0.965812 0.008547 0.128205 0.410256 0.675214 1.000000 0.068376 0.111111 0.085470 0.059829 0.017094 0.025641 0.034188 0.068376 0.051282 0.051282 0.068376 0.008547 0.051282 0.008547 0.059829 0.051282 0.085470 0.025641 0.068376 0.000000 
>YBL079w
0.320240 0.350866 0.328895 0.207195 0.203864 0.233844 0.001997 0.262317 0.549933 0.761651 1.000000 0.002663 0.225699 0.434088 0.683755 0.998668 0.000666 0.266977 0.527963 0.782290 0.998003 0.461385 0.147137 0.391478 0.053298 0.073284 0.003997 0.000666 0.177763 0.384154 0.629161 1.000000 0.059254 0.182423 0.291611 0.425433 0.998668 0.002663 0.521971 0.690413 0.846205 0.991345 0.575899 0.393071 0.002663 0.243009 0.482690 0.727031 0.998668 0.358189 0.404794 0.237017 0.293138 0.161226 0.205863 0.002663 0.228362 0.454061 0.693076 0.997337 0.001997 0.264980 0.525300 0.755659 1.000000 0.000666 0.264314 0.544607 0.788948 0.999334 0.365513 0.296272 0.338216 0.219853 0.245836 0.171885 0.000666 0.274967 0.541944 0.782290 0.998668 0.002663 0.225699 0.421438 0.656458 0.996005 0.001997 0.249001 0.545939 0.763648 1.000000 0.312250 0.450732 0.237017 0.286476 0.137242 0.229847 0.002663 0.233023 0.466711 0.700399 0.996005 0.001997 0.257656 0.502663 0.747670 1.000000 0.000666 0.264314 0.544607 0.788948 0.999334 0.035286 0.065246 0.061917 0.053262 0.039947 0.064581 0.043941 0.055260 0.101864 0.057923 0.037284 0.017976 0.036618 0.008655 0.054594 0.095872 0.087883 0.018642 0.056591 0.006658 
>YBL080c
0.349353 0.340111 0.310536 0.251852 0.266667 0.192593 0.005545 0.284658 0.515712 0.778189 0.998152 0.009242 0.182994 0.452865 0.676525 0.972274 0.001848 0.282810 0.547135 0.785582 1.000000 0.451017 0.144177 0.404806 0.057407 0.087037 0.001852 0.001848 0.184843 0.395564 0.632163 1.000000 0.051756 0.190388 0.284658 0.426987 0.872458 0.005545 0.478743 0.689464 0.850277 0.992606 0.530499 0.411111 0.007394 0.221811 0.430684 0.711645 0.992606 0.336414 0.406654 0.256932 0.272222 0.168519 0.198148 0.009242 0.210721 0.467652 0.700555 0.972274 0.003697 0.282810 0.493530 0.778189 0.998152 0.001848 0.227357 0.532348 0.756007 1.000000 0.349353 0.271719 0.378928 0.181481 0.322222 0.218519 0.001848 0.273567 0.519409 0.763401 1.000000 0.009242 0.175601 0.458410 0.695009 0.972274 0.005545 0.269871 0.508318 0.778189 0.998152 0.286506 0.456562 0.256932 0.248148 0.148148 0.218519 0.009242 0.207024 0.456562 0.695009 0.972274 0.003697 0.279113 0.508318 0.768946 0.998152 0.001848 0.227357 0.532348 0.756007 1.000000 0.046211 0.073937 0.060998 0.059150 0.053604 0.055453 0.044362 0.055453 0.075786 0.051756 0.044362 0.029575 0.038817 0.005545 0.040665 0.120148 0.075786 0.022181 0.040665 0.005545 
>YBL081w
0.307065 0.510870 0.182065 0.247956 0.106267 0.174387 0.010870 0.217391 0.410326 0.535326 0.986413 0.005435 0.260870 0.570652 0.769022 1.000000 0.002717 0.225543 0.600543 0.807065 0.997283 0.801630 0.086957 0.111413 0.051771 0.046322 0.002725 0.002717 0.279891 0.532609 0.763587 1.000000 0.013587 0.173913 0.413043 0.592391 0.978261 0.043478 0.067935 0.347826 0.695652 0.899457 0.377717 0.381471 0.013587 0.184783 0.497283 0.774457 0.989130 0.434783 0.361413 0.203804 0.261580 0.133515 0.147139 0.005435 0.361413 0.635870 0.801630 1.000000 0.010870 0.225543 0.445652 0.649457 0.994565 0.002717 0.152174 0.320652 0.592391 0.997283 0.241848 0.410326 0.347826 0.168937 0.177112 0.198910 0.002717 0.179348 0.418478 0.755435 0.997283 0.005435 0.361413 0.625000 0.798913 1.000000 0.010870 0.206522 0.396739 0.565217 0.986413 0.361413 0.434783 0.203804 0.275204 0.098093 0.182561 0.008152 0.372283 0.635870 0.798913 1.000000 0.005435 0.233696 0.456522 0.706522 0.994565 0.002717 0.152174 0.320652 0.592391 0.997283 0.019022 0.021739 0.010870 0.024457 0.059783 0.171196 0.024457 0.043478 0.201087 0.067935 0.073370 0.040761 0.059783 0.000000 0.024457 0.065217 0.029891 0.029891 0.024457 0.008152 
>YBL082c
0.218341 0.338428 0.443231 0.146608 0.175055 0.321663 0.004367 0.150655 0.432314 0.657205 1.000000 0.006550 0.275109 0.524017 0.792576 0.986900 0.002183 0.279476 0.504367 0.737991 0.997817 0.259825 0.052402 0.687773 0.026258 0.096280 0.000000 0.002183 0.185590 0.432314 0.742358 1.000000 0.074236 0.150655 0.200873 0.624454 0.637555 0.024017 0.307860 0.502183 0.781659 0.995633 0.735808 0.214442 0.028384 0.290393 0.502183 0.766376 0.989083 0.314410 0.397380 0.288210 0.273523 0.185996 0.223195 0.006550 0.259825 0.508734 0.766376 0.986900 0.004367 0.233624 0.506550 0.748908 1.000000 0.002183 0.248908 0.482533 0.709607 0.995633 0.491266 0.262009 0.246725 0.264770 0.236324 0.129103 0.002183 0.262009 0.491266 0.729258 0.997817 0.006550 0.303493 0.554585 0.801310 0.986900 0.004367 0.168122 0.436681 0.679039 1.000000 0.244541 0.467249 0.288210 0.258206 0.126915 0.282276 0.006550 0.259825 0.521834 0.781659 0.986900 0.004367 0.233624 0.497817 0.748908 1.000000 0.002183 0.248908 0.482533 0.709607 0.995633 0.039301 0.043668 0.028384 0.030568 0.041485 0.034934 0.034934 0.069869 0.067686 0.041485 0.048035 0.028384 0.048035 0.021834 0.069869 0.161572 0.061135 0.045852 0.054585 0.028384 
>YBL084c
0.333773 0.377309 0.288918 0.237781 0.188904 0.232497 0.005277 0.310026 0.498681 0.734828 1.000000 0.002639 0.245383 0.461741 0.759894 0.996042 0.001319 0.193931 0.538259 0.738786 0.997361 0.424802 0.007916 0.567282 0.010568 0.095112 0.000000 0.001319 0.290237 0.405013 0.527704 1.000000 0.014512 0.014512 0.295515 0.296834 0.493404 0.027704 0.213720 0.639842 0.813984 0.994723 0.546174 0.404227 0.009235 0.213720 0.530343 0.755937 0.997361 0.361478 0.406332 0.232190 0.265522 0.183620 0.174373 0.002639 0.254617 0.463061 0.751979 0.994723 0.003958 0.220317 0.488127 0.722955 1.000000 0.001319 0.269129 0.580475 0.783641 0.997361 0.336412 0.303430 0.360158 0.208719 0.247028 0.203435 0.001319 0.195251 0.554090 0.786280 0.997361 0.002639 0.254617 0.436675 0.736148 0.980211 0.005277 0.291557 0.500000 0.740106 1.000000 0.299472 0.468338 0.232190 0.262880 0.157199 0.200793 0.002639 0.237467 0.445910 0.748021 0.988127 0.003958 0.238786 0.488127 0.724274 1.000000 0.001319 0.269129 0.580475 0.783641 0.997361 0.029024 0.065963 0.039578 0.036939 0.051451 0.110818 0.030343 0.067282 0.109499 0.055409 0.040897 0.026385 0.047493 0.021108 0.031662 0.113456 0.059367 0.021108 0.035620 0.006596 
>YBL085w
0.358163 0.429592 0.212245 0.291113 0.162411 0.184883 0.004082 0.223469 0.469388 0.738776 0.998980 0.002041 0.301020 0.527551 0.739796 0.997959 0.001020 0.241837 0.455102 0.783673 1.000000 0.695918 0.109184 0.194898 0.057201 0.061287 0.004086 0.001020 0.229592 0.481633 0.694898 1.000000 0.017347 0.264286 0.533673 0.824490 0.923469 0.022449 0.271429 0.569388 0.852041 0.989796 0.350000 0.388151 0.003061 0.240816 0.492857 0.810204 0.994898 0.427551 0.324490 0.247959 0.270684 0.221655 0.134831 0.002041 0.296939 0.513265 0.755102 0.997959 0.003061 0.204082 0.415306 0.726531 1.000000 0.001020 0.272449 0.567347 0.748980 0.998980 0.238776 0.376531 0.384694 0.192033 0.181818 0.269663 0.001020 0.232653 0.451020 0.789796 1.000000 0.002041 0.302041 0.517347 0.743878 0.997959 0.004082 0.235714 0.484694 0.729592 0.998980 0.367347 0.384694 0.247959 0.277835 0.200204 0.156282 0.002041 0.262245 0.535714 0.759184 0.997959 0.003061 0.221429 0.424490 0.725510 1.000000 0.001020 0.272449 0.567347 0.748980 0.998980 0.044898 0.089796 0.070408 0.046939 0.042857 0.063265 0.040816 0.051020 0.157143 0.071429 0.056122 0.026531 0.026531 0.004082 0.036735 0.066327 0.044898 0.015306 0.038776 0.006122 
>YBL086c
0.358369 0.412017 0.229614 0.277419 0.195699 0.159140 0.008584 0.270386 0.542918 0.824034 0.982833 0.004292 0.263948 0.510730 0.690987 1.000000 0.002146 0.214592 0.418455 0.682403 0.991416 0.633047 0.171674 0.195279 0.068817 0.038710 0.012903 0.002146 0.270386 0.534335 0.746781 1.000000 0.068670 0.186695 0.334764 0.416309 0.991416 0.030043 0.240343 0.710300 0.849785 0.976395 0.390558 0.391398 0.025751 0.231760 0.437768 0.710300 0.993562 0.414163 0.347639 0.238197 0.270968 0.195699 0.189247 0.004292 0.272532 0.519313 0.714592 1.000000 0.008584 0.255365 0.484979 0.757511 0.991416 0.002146 0.173820 0.437768 0.766094 0.984979 0.259657 0.356223 0.384120 0.159140 0.230108 0.238710 0.002146 0.221030 0.422747 0.697425 0.991416 0.004292 0.283262 0.519313 0.686695 1.000000 0.008584 0.218884 0.523605 0.809013 0.982833 0.360515 0.401288 0.238197 0.283871 0.161290 0.223656 0.015021 0.272532 0.512876 0.723176 1.000000 0.004292 0.268240 0.502146 0.757511 0.995708 0.002146 0.173820 0.437768 0.766094 0.984979 0.036481 0.085837 0.051502 0.053648 0.032189 0.098712 0.064378 0.038627 0.105150 0.098712 0.049356 0.025751 0.030043 0.004292 0.034335 0.083691 0.047210 0.015021 0.030043 0.015021 
>YBL087c
0.291971 0.394161 0.313869 0.227941 0.169118 0.257353 0.029197 0.291971 0.518248 0.708029 0.963504 0.014599 0.211679 0.437956 0.766423 0.978102 0.007299 0.248175 0.503650 0.737226 1.000000 0.569343 0.379562 0.051095 0.235294 0.029412 0.000000 0.007299 0.204380 0.496350 0.773723 1.000000 0.080292 0.248175 0.452555 0.627737 0.992701 0.875912 0.875912 0.890511 0.934307 0.948905 0.532847 0.352941 0.080292 0.270073 0.540146 0.737226 0.970803 0.430657 0.321168 0.248175 0.316176 0.154412 0.191176 0.014599 0.197080 0.437956 0.781022 0.978102 0.029197 0.248175 0.503650 0.744526 1.000000 0.007299 0.291971 0.518248 0.642336 0.934307 0.328467 0.379562 0.291971 0.227941 0.169118 0.227941 0.007299 0.255474 0.503650 0.693431 1.000000 0.014599 0.211679 0.437956 0.781022 0.978102 0.029197 0.291971 0.518248 0.708029 0.963504 0.364964 0.386861 0.248175 0.294118 0.117647 0.227941 0.014599 0.197080 0.408759 0.751825 0.978102 0.029197 0.248175 0.503650 0.759124 1.000000 0.007299 0.291971 0.518248 0.642336 0.934307 0.072993 0.080292 0.029197 0.036496 0.014599 0.058394 0.124088 0.109489 0.072993 0.021898 0.051095 0.000000 0.014599 0.014599 0.102190 0.065693 0.051095 0.043796 0.021898 0.014599 
>YBL089w
0.198257 0.376906 0.424837 0.131004 0.131004 0.351528 0.008715 0.263617 0.505447 0.732026 0.936819 0.004357 0.235294 0.479303 0.779956 1.000000 0.002179 0.224401 0.485839 0.723312 0.989107 0.296296 0.028322 0.675381 0.006550 0.072052 0.006550 0.002179 0.283224 0.509804 0.736383 1.000000 0.220044 0.224401 0.300654 0.307190 0.703704 0.010893 0.206972 0.494553 0.793028 0.986928 0.710240 0.192140 0.013072 0.224401 0.492375 0.784314 0.991285 0.357298 0.407407 0.235294 0.310044 0.170306 0.174672 0.004357 0.200436 0.488017 0.775599 0.997821 0.008715 0.257081 0.522876 0.758170 0.989107 0.002179 0.281046 0.470588 0.692810 1.000000 0.461874 0.313725 0.224401 0.323144 0.159389 0.122271 0.002179 0.239651 0.485839 0.718954 0.989107 0.004357 0.204793 0.531590 0.821351 0.997821 0.008715 0.276688 0.496732 0.727669 1.000000 0.289760 0.474946 0.235294 0.288210 0.131004 0.213974 0.006536 0.213508 0.507625 0.821351 0.997821 0.004357 0.239651 0.514161 0.745098 0.989107 0.002179 0.281046 0.470588 0.692810 1.000000 0.039216 0.032680 0.028322 0.021786 0.028322 0.047930 0.063181 0.056645 0.095861 0.052288 0.045752 0.026144 0.037037 0.021786 0.071895 0.119826 0.111111 0.026144 0.071895 0.002179 
>YBL090w
0.435028 0.276836 0.288136 0.278409 0.267045 0.136364 0.016949 0.271186 0.536723 0.757062 0.988701 0.022599 0.248588 0.423729 0.655367 1.000000 0.005650 0.186441 0.463277 0.706215 0.954802 0.367232 0.084746 0.548023 0.039773 0.119318 0.005682 0.005650 0.254237 0.372881 0.717514 1.000000 0.344633 0.355932 0.559322 0.604520 0.785311 0.016949 0.192090 0.514124 0.841808 0.983051 0.395480 0.431818 0.033898 0.209040 0.485876 0.694915 0.971751 0.316384 0.367232 0.316384 0.255682 0.176136 0.187500 0.022599 0.231638 0.378531 0.638418 0.994350 0.011299 0.214689 0.468927 0.677966 0.954802 0.005650 0.361582 0.672316 0.864407 1.000000 0.299435 0.259887 0.440678 0.130682 0.267045 0.267045 0.005650 0.192090 0.468927 0.728814 1.000000 0.022599 0.242938 0.418079 0.638418 0.994350 0.016949 0.271186 0.548023 0.768362 0.988701 0.282486 0.401130 0.316384 0.238636 0.170455 0.193182 0.022599 0.231638 0.355932 0.581921 0.994350 0.011299 0.209040 0.468927 0.683616 0.954802 0.005650 0.361582 0.672316 0.864407 1.000000 0.107345 0.101695 0.056497 0.050847 0.045198 0.073446 0.050847 0.050847 0.101695 0.028249 0.028249 0.005650 0.011299 0.005650 0.028249 0.073446 0.090395 0.050847 0.039548 0.000000 
>YBL091c
0.382423 0.361045 0.256532 0.254762 0.226190 0.176190 0.007126 0.163895 0.375297 0.693587 0.997625 0.004751 0.342043 0.555819 0.762470 1.000000 0.002375 0.301663 0.520190 0.767221 0.985748 0.503563 0.180523 0.315914 0.083333 0.054762 0.002381 0.002375 0.173397 0.415677 0.710214 1.000000 0.011876 0.467933 0.665083 0.774347 0.988124 0.028504 0.261283 0.532067 0.807601 0.902613 0.496437 0.342857 0.014252 0.394299 0.555819 0.767221 0.992874 0.370546 0.358670 0.270784 0.247619 0.209524 0.157143 0.004751 0.311164 0.524941 0.748219 0.997625 0.011876 0.228029 0.484561 0.726841 0.985748 0.002375 0.220903 0.444181 0.750594 1.000000 0.299287 0.285036 0.415677 0.180952 0.285714 0.214286 0.002375 0.306413 0.529691 0.774347 1.000000 0.004751 0.332542 0.539192 0.748219 0.992874 0.007126 0.182898 0.422803 0.712589 0.997625 0.320665 0.408551 0.270784 0.254762 0.178571 0.188095 0.004751 0.299287 0.515439 0.743468 0.997625 0.011876 0.237530 0.508314 0.729216 0.985748 0.002375 0.220903 0.444181 0.750594 1.000000 0.049881 0.087886 0.083135 0.076010 0.033254 0.052257 0.073634 0.068884 0.045131 0.057007 0.040380 0.033254 0.042755 0.009501 0.064133 0.073634 0.052257 0.023753 0.028504 0.004751 
>YBL091c-a
0.337143 0.337143 0.325714 0.229885 0.183908 0.178161 0.011429 0.171429 0.451429 0.657143 0.902857 0.028571 0.274286 0.537143 0.822857 1.000000 0.005714 0.257143 0.485714 0.714286 0.988571 0.554286 0.342857 0.102857 0.109195 0.028736 0.040230 0.005714 0.245714 0.457143 0.754286 1.000000 0.045714 0.194286 0.360000 0.708571 0.994286 0.577143 0.594286 0.622857 0.902857 0.988571 0.451429 0.344828 0.017143 0.222857 0.468571 0.714286 0.977143 0.348571 0.405714 0.245714 0.264368 0.137931 0.183908 0.028571 0.291429 0.525714 0.800000 0.977143 0.017143 0.205714 0.491429 0.702857 0.988571 0.005714 0.177143 0.457143 0.708571 1.000000 0.360000 0.285714 0.354286 0.160920 0.218391 0.195402 0.005714 0.251429 0.491429 0.720000 1.000000 0.028571 0.274286 0.531429 0.822857 0.977143 0.011429 0.177143 0.457143 0.662857 0.902857 0.280000 0.474286 0.245714 0.241379 0.103448 0.218391 0.068571 0.314286 0.537143 0.817143 0.977143 0.017143 0.234286 0.491429 0.702857 0.988571 0.005714 0.177143 0.457143 0.708571 1.000000 0.045714 0.091429 0.062857 0.057143 0.034286 0.045714 0.045714 0.074286 0.068571 0.034286 0.062857 0.017143 0.034286 0.005714 0.085714 0.091429 0.085714 0.011429 0.034286 0.011429 
>YBL092w
0.353846 0.392308 0.253846 0.286822 0.193798 0.186047 0.061538 0.230769 0.400000 0.692308 0.992308 0.015385 0.200000 0.523077 0.723077 1.000000 0.007692 0.292308 0.569231 0.769231 0.984615 0.623077 0.107692 0.269231 0.062016 0.077519 0.000000 0.007692 0.200000 0.392308 0.669231 1.000000 0.069231 0.084615 0.553846 0.576923 0.923077 0.315385 0.484615 0.707692 0.807692 0.876923 0.369231 0.449612 0.069231 0.407692 0.584615 0.769231 0.969231 0.330769 0.300000 0.369231 0.255814 0.263566 0.147287 0.015385 0.300000 0.530769 0.746154 1.000000 0.030769 0.315385 0.600000 0.815385 0.992308 0.007692 0.153846 0.346154 0.615385 0.961538 0.276923 0.307692 0.415385 0.209302 0.217054 0.294574 0.007692 0.292308 0.569231 0.769231 0.984615 0.015385 0.369231 0.538462 0.776923 1.000000 0.046154 0.184615 0.376923 0.676923 0.992308 0.292308 0.338462 0.369231 0.248062 0.224806 0.186047 0.015385 0.307692 0.561538 0.746154 1.000000 0.030769 0.315385 0.584615 0.815385 0.992308 0.007692 0.153846 0.346154 0.615385 0.961538 0.084615 0.146154 0.030769 0.023077 0.015385 0.053846 0.053846 0.092308 0.061538 0.061538 0.038462 0.061538 0.023077 0.000000 0.069231 0.069231 0.061538 0.015385 0.030769 0.007692 
>YBL093c
0.395455 0.390909 0.213636 0.251142 0.210046 0.141553 0.018182 0.281818 0.522727 0.763636 1.000000 0.009091 0.177273 0.472727 0.800000 0.959091 0.004545 0.213636 0.454545 0.627273 0.995455 0.604545 0.063636 0.331818 0.031963 0.086758 0.013699 0.004545 0.322727 0.509091 0.809091 1.000000 0.059091 0.068182 0.104545 0.427273 0.781818 0.140909 0.259091 0.418182 0.650000 0.990909 0.354545 0.374429 0.022727 0.177273 0.413636 0.590909 0.972727 0.422727 0.336364 0.240909 0.301370 0.200913 0.141553 0.009091 0.240909 0.563636 0.786364 0.968182 0.022727 0.231818 0.468182 0.645455 1.000000 0.004545 0.268182 0.504545 0.781818 0.990909 0.254545 0.336364 0.409091 0.164384 0.223744 0.255708 0.004545 0.168182 0.418182 0.622727 0.995455 0.009091 0.245455 0.509091 0.804545 0.954545 0.018182 0.295455 0.531818 0.768182 1.000000 0.359091 0.400000 0.240909 0.283105 0.191781 0.150685 0.009091 0.240909 0.572727 0.804545 0.968182 0.022727 0.231818 0.472727 0.645455 1.000000 0.004545 0.268182 0.504545 0.781818 0.990909 0.059091 0.054545 0.040909 0.081818 0.090909 0.068182 0.063636 0.050000 0.109091 0.054545 0.059091 0.013636 0.040909 0.004545 0.031818 0.063636 0.040909 0.027273 0.036364 0.009091 
>YBL095w
0.303704 0.333333 0.362963 0.219331 0.211896 0.263941 0.011111 0.274074 0.522222 0.762963 0.992593 0.007407 0.200000 0.462963 0.670370 0.974074 0.003704 0.248148 0.525926 0.751852 1.000000 0.455556 0.259259 0.285185 0.074349 0.059480 0.007435 0.003704 0.200000 0.477778 0.803704 1.000000 0.055556 0.355556 0.659259 0.748148 0.948148 0.018519 0.240741 0.374074 0.600000 0.992593 0.592593 0.379182 0.018519 0.255556 0.500000 0.711111 0.988889 0.333333 0.392593 0.274074 0.278810 0.197026 0.182156 0.007407 0.177778 0.466667 0.692593 0.992593 0.018519 0.259259 0.488889 0.722222 0.988889 0.003704 0.322222 0.555556 0.851852 1.000000 0.381481 0.274074 0.344444 0.215613 0.260223 0.200743 0.003704 0.255556 0.511111 0.751852 1.000000 0.007407 0.170370 0.425926 0.670370 0.959259 0.011111 0.296296 0.485185 0.762963 0.992593 0.266667 0.459259 0.274074 0.252788 0.163569 0.215613 0.007407 0.177778 0.444444 0.670370 0.992593 0.018519 0.255556 0.496296 0.725926 0.988889 0.003704 0.322222 0.555556 0.851852 1.000000 0.040741 0.077778 0.070370 0.044444 0.029630 0.040741 0.074074 0.059259 0.048148 0.040741 0.051852 0.040741 0.018519 0.014815 0.066667 0.125926 0.059259 0.018519 0.059259 0.018519 
>YBL097w
0.448276 0.289125 0.262599 0.233732 0.236388 0.147410 0.005305 0.266578 0.513263 0.755968 0.996021 0.002653 0.210875 0.507958 0.741379 1.000000 0.001326 0.242706 0.444297 0.720159 0.990716 0.698939 0.054377 0.246684 0.025232 0.070385 0.011952 0.001326 0.298408 0.514589 0.730769 1.000000 0.003979 0.114058 0.379310 0.822281 0.985411 0.033156 0.123342 0.408488 0.858090 0.996021 0.399204 0.345286 0.003979 0.246684 0.444297 0.689655 0.994695 0.374005 0.389920 0.236074 0.277556 0.159363 0.181939 0.002653 0.237401 0.489390 0.734748 1.000000 0.005305 0.241379 0.441645 0.757294 0.996021 0.001326 0.266578 0.590186 0.744032 0.986737 0.281167 0.249337 0.469496 0.136786 0.262948 0.209827 0.001326 0.236074 0.449602 0.736074 0.990716 0.002653 0.197613 0.478780 0.726790 1.000000 0.005305 0.281167 0.529178 0.758621 0.996021 0.348806 0.415119 0.236074 0.273572 0.147410 0.193891 0.002653 0.228117 0.492042 0.737401 1.000000 0.005305 0.242706 0.442971 0.755968 0.996021 0.001326 0.266578 0.590186 0.744032 0.986737 0.046419 0.074271 0.088859 0.118037 0.034483 0.086207 0.045093 0.042440 0.075597 0.067639 0.018568 0.021220 0.018568 0.006631 0.049072 0.072944 0.058355 0.021220 0.046419 0.007958 
>YBL098w
0.326087 0.345652 0.328261 0.237473 0.220044 0.239651 0.006522 0.245652 0.463043 0.754348 0.997826 0.004348 0.230435 0.482609 0.747826 1.000000 0.002174 0.252174 0.523913 0.739130 0.989130 0.434783 0.169565 0.395652 0.061002 0.065359 0.000000 0.002174 0.204348 0.434783 0.632609 1.000000 0.008696 0.232609 0.347826 0.502174 0.897826 0.026087 0.380435 0.734783 0.847826 0.989130 0.628261 0.339869 0.010870 0.252174 0.508696 0.763043 0.991304 0.365217 0.339130 0.295652 0.261438 0.237473 0.196078 0.004348 0.223913 0.506522 0.715217 1.000000 0.006522 0.228261 0.445652 0.721739 0.995652 0.002174 0.317391 0.541304 0.808696 0.997826 0.365217 0.280435 0.354348 0.235294 0.263617 0.206972 0.002174 0.260870 0.523913 0.741304 0.989130 0.004348 0.223913 0.506522 0.736957 1.000000 0.006522 0.245652 0.463043 0.747826 0.997826 0.317391 0.386957 0.295652 0.261438 0.206972 0.226580 0.004348 0.219565 0.515217 0.750000 1.000000 0.006522 0.228261 0.452174 0.695652 0.995652 0.002174 0.317391 0.541304 0.808696 0.997826 0.056522 0.080435 0.056522 0.069565 0.026087 0.036957 0.060870 0.060870 0.076087 0.050000 0.032609 0.028261 0.036957 0.015217 0.034783 0.104348 0.080435 0.034783 0.052174 0.006522 
>YBL099w
0.304587 0.401835 0.293578 0.259191 0.178309 0.244485 0.007339 0.238532 0.473394 0.763303 0.988991 0.005505 0.253211 0.506422 0.735780 0.998165 0.001835 0.242202 0.493578 0.748624 1.000000 0.350459 0.174312 0.475229 0.086397 0.084559 0.001838 0.001835 0.262385 0.418349 0.684404 0.966972 0.110092 0.181651 0.302752 0.552294 0.750459 0.003670 0.390826 0.601835 0.838532 1.000000 0.614679 0.367647 0.005505 0.247706 0.500917 0.706422 0.992661 0.405505 0.403670 0.190826 0.325368 0.152574 0.159926 0.005505 0.244037 0.480734 0.706422 0.998165 0.003670 0.240367 0.493578 0.770642 0.994495 0.001835 0.302752 0.539450 0.766972 1.000000 0.319266 0.365138 0.315596 0.231618 0.198529 0.238971 0.001835 0.256881 0.522936 0.748624 1.000000 0.005505 0.223853 0.495413 0.733945 0.998165 0.007339 0.262385 0.477064 0.766972 0.988991 0.363303 0.445872 0.190826 0.316176 0.136029 0.176471 0.005505 0.223853 0.488073 0.735780 0.998165 0.003670 0.245872 0.491743 0.748624 0.994495 0.001835 0.302752 0.539450 0.766972 1.000000 0.064220 0.053211 0.067890 0.038532 0.047706 0.033028 0.086239 0.111927 0.077064 0.049541 0.040367 0.011009 0.025688 0.001835 0.080734 0.119266 0.055046 0.005505 0.027523 0.003670 
>YBL100w-a
0.344749 0.424658 0.230594 0.279176 0.173913 0.196796 0.004566 0.301370 0.570776 0.787671 0.997717 0.006849 0.194064 0.388128 0.728311 0.993151 0.002283 0.351598 0.538813 0.703196 1.000000 0.671233 0.041096 0.287671 0.027460 0.050343 0.000000 0.002283 0.187215 0.356164 0.753425 1.000000 0.041096 0.047945 0.860731 0.869863 0.965753 0.009132 0.525114 0.614155 0.728311 0.904110 0.390411 0.356979 0.013699 0.264840 0.497717 0.684932 0.984018 0.383562 0.376712 0.239726 0.260870 0.173913 0.194508 0.006849 0.203196 0.408676 0.719178 0.993151 0.004566 0.301370 0.541096 0.737443 1.000000 0.002283 0.276256 0.502283 0.755708 0.997717 0.280822 0.333333 0.385845 0.180778 0.244851 0.240275 0.002283 0.305936 0.529680 0.707763 1.000000 0.006849 0.180365 0.388128 0.719178 0.993151 0.004566 0.260274 0.534247 0.785388 0.997717 0.305936 0.454338 0.239726 0.247140 0.151030 0.217391 0.006849 0.210046 0.500000 0.760274 0.993151 0.004566 0.244292 0.484018 0.707763 1.000000 0.002283 0.276256 0.502283 0.755708 0.997717 0.034247 0.057078 0.050228 0.043379 0.075342 0.084475 0.020548 0.057078 0.107306 0.077626 0.070776 0.041096 0.050228 0.006849 0.045662 0.070776 0.050228 0.022831 0.025114 0.009132 
>YBL100w-b
0.354802 0.385876 0.259322 0.269079 0.189938 0.201809 0.001130 0.253107 0.529379 0.746893 0.998305 0.001695 0.224294 0.464407 0.703390 1.000000 0.000565 0.279661 0.500000 0.799435 0.999435 0.612994 0.140678 0.246328 0.057660 0.047484 0.002261 0.000565 0.225989 0.509040 0.668927 1.000000 0.010169 0.309605 0.494915 0.776271 0.984181 0.002260 0.190395 0.453107 0.850847 0.998870 0.464972 0.355003 0.003390 0.276836 0.485311 0.794915 0.998870 0.376836 0.371186 0.251977 0.265122 0.188242 0.192764 0.001695 0.244068 0.496045 0.703390 0.997175 0.001130 0.244633 0.500565 0.769492 0.999435 0.000565 0.266667 0.498305 0.775141 1.000000 0.306215 0.302825 0.390960 0.181458 0.250989 0.235726 0.000565 0.276836 0.500000 0.794915 0.999435 0.001695 0.226554 0.469492 0.688136 0.997175 0.001130 0.249718 0.518644 0.740113 1.000000 0.313559 0.434463 0.251977 0.260034 0.162804 0.218202 0.001695 0.251977 0.507910 0.710734 0.997175 0.001130 0.238983 0.492090 0.761017 0.999435 0.000565 0.266667 0.498305 0.775141 1.000000 0.041808 0.073446 0.050282 0.065537 0.048023 0.075706 0.033333 0.045198 0.092655 0.076836 0.054802 0.036158 0.046893 0.008475 0.039548 0.085876 0.071751 0.017514 0.027684 0.008475 
>YBL101c
0.336616 0.418084 0.245300 0.274194 0.158602 0.211470 0.006267 0.241719 0.494181 0.735004 1.000000 0.001791 0.225604 0.493286 0.762757 0.997314 0.000895 0.294539 0.510295 0.749329 0.996419 0.663384 0.189794 0.146822 0.077957 0.052867 0.002688 0.000895 0.241719 0.517457 0.790510 1.000000 0.003581 0.343778 0.541629 0.722471 0.992838 0.032229 0.179051 0.370636 0.591764 0.982095 0.418979 0.396057 0.003581 0.283796 0.521038 0.754700 0.996419 0.429722 0.352731 0.217547 0.304659 0.173835 0.163978 0.001791 0.224709 0.484333 0.777977 0.998209 0.003581 0.263205 0.496867 0.754700 1.000000 0.000895 0.305282 0.521934 0.716204 0.996419 0.276634 0.365264 0.358102 0.202509 0.192652 0.250896 0.000895 0.305282 0.520143 0.744852 0.996419 0.001791 0.210385 0.473590 0.783348 0.997314 0.006267 0.252462 0.494181 0.733214 1.000000 0.355416 0.427037 0.217547 0.295699 0.148746 0.189068 0.004476 0.208594 0.453894 0.763653 0.998209 0.001791 0.277529 0.517457 0.764548 1.000000 0.000895 0.305282 0.521934 0.716204 0.996419 0.053715 0.058192 0.059982 0.058192 0.029543 0.076992 0.050134 0.048344 0.131603 0.067144 0.068039 0.021486 0.031334 0.006267 0.054611 0.076097 0.055506 0.016115 0.034020 0.002686 
>YBL102w
0.232558 0.372093 0.395349 0.168224 0.112150 0.345794 0.013953 0.111628 0.255814 0.502326 0.995349 0.009302 0.260465 0.558140 0.800000 0.981395 0.004651 0.386047 0.562791 0.744186 1.000000 0.251163 0.000000 0.748837 0.000000 0.074766 0.000000 0.004651 0.148837 0.279070 0.339535 1.000000 0 0 0 0 0 0.037209 0.386047 0.576744 0.786047 0.990698 0.539535 0.289720 0.046512 0.455814 0.595349 0.800000 0.990698 0.390698 0.348837 0.260465 0.275701 0.228972 0.158879 0.009302 0.232558 0.493023 0.762791 0.981395 0.013953 0.213953 0.409302 0.744186 1.000000 0.004651 0.339535 0.548837 0.730233 0.995349 0.423256 0.339535 0.237209 0.327103 0.121495 0.158879 0.004651 0.386047 0.572093 0.767442 1.000000 0.009302 0.232558 0.525581 0.772093 0.981395 0.013953 0.111628 0.255814 0.511628 0.995349 0.325581 0.413953 0.260465 0.271028 0.186916 0.200935 0.009302 0.209302 0.497674 0.772093 0.981395 0.013953 0.237209 0.437209 0.683721 1.000000 0.004651 0.339535 0.548837 0.730233 0.995349 0.060465 0.023256 0.032558 0.027907 0.051163 0.037209 0.046512 0.088372 0.088372 0.074419 0.041860 0.004651 0.027907 0.023256 0.060465 0.139535 0.027907 0.032558 0.093023 0.018605 
>YBL103c
0.353909 0.421811 0.224280 0.270103 0.162887 0.177320 0.006173 0.222222 0.580247 0.757202 0.991770 0.014403 0.242798 0.448560 0.709877 1.000000 0.002058 0.296296 0.555556 0.738683 0.993827 0.588477 0.034979 0.376543 0.020619 0.078351 0.004124 0.002058 0.259259 0.444444 0.670782 1.000000 0.094650 0.137860 0.170782 0.816872 0.991770 0.014403 0.228395 0.625514 0.753086 0.989712 0.450617 0.424742 0.022634 0.269547 0.467078 0.744856 0.993827 0.405350 0.372428 0.222222 0.288660 0.171134 0.173196 0.014403 0.246914 0.442387 0.693416 1.000000 0.006173 0.218107 0.578189 0.771605 0.991770 0.002058 0.283951 0.522634 0.732510 0.993827 0.257202 0.351852 0.390947 0.177320 0.195876 0.241237 0.002058 0.279835 0.528807 0.720165 0.993827 0.014403 0.246914 0.448560 0.693416 1.000000 0.006173 0.220165 0.580247 0.783951 0.991770 0.349794 0.427984 0.222222 0.303093 0.148454 0.195876 0.014403 0.238683 0.442387 0.709877 1.000000 0.006173 0.242798 0.557613 0.771605 0.991770 0.002058 0.283951 0.522634 0.732510 0.993827 0.045267 0.049383 0.076132 0.053498 0.047325 0.082305 0.055556 0.051440 0.133745 0.055556 0.055556 0.037037 0.032922 0.000000 0.026749 0.092593 0.047325 0.028807 0.026749 0.002058 
>YBL104c
0.358382 0.352601 0.289017 0.229508 0.213115 0.204436 0.004817 0.263969 0.487476 0.735067 1.000000 0.001927 0.223507 0.500000 0.766859 0.995183 0.000963 0.261079 0.504817 0.738921 0.998073 0.544316 0.125241 0.330443 0.055931 0.077146 0.011572 0.000963 0.221580 0.459538 0.779383 1.000000 0.003854 0.138728 0.316956 0.507707 0.934489 0.011561 0.393064 0.611753 0.737958 0.984586 0.542389 0.372228 0.002890 0.248555 0.492293 0.727360 0.998073 0.390173 0.364162 0.245665 0.296046 0.182257 0.172613 0.001927 0.245665 0.506744 0.772640 0.998073 0.002890 0.237958 0.469171 0.718690 0.999037 0.000963 0.260116 0.523121 0.773603 1.000000 0.327553 0.295761 0.376686 0.199614 0.254581 0.195757 0.000963 0.255299 0.501927 0.733141 0.998073 0.001927 0.228324 0.506744 0.772640 0.995183 0.004817 0.258189 0.482659 0.736031 1.000000 0.333333 0.421002 0.245665 0.291225 0.148505 0.206365 0.001927 0.234104 0.497110 0.746628 0.995183 0.002890 0.243738 0.484586 0.749518 0.999037 0.000963 0.260116 0.523121 0.773603 1.000000 0.061657 0.054913 0.059730 0.072254 0.027938 0.081888 0.057803 0.056840 0.093449 0.052987 0.034682 0.018304 0.038536 0.022158 0.043353 0.081888 0.069364 0.022158 0.031792 0.018304 
>YBL105c
0.384883 0.335361 0.279757 0.239130 0.223478 0.174783 0.004344 0.213727 0.503910 0.715030 0.999131 0.001738 0.284101 0.497828 0.739357 0.995656 0.000869 0.252824 0.493484 0.788010 1.000000 0.602954 0.111208 0.285838 0.048696 0.057391 0.006957 0.000869 0.305821 0.530843 0.707211 1.000000 0.055604 0.228497 0.388358 0.732407 0.993918 0.002606 0.121633 0.435274 0.806255 0.988705 0.470895 0.375652 0.005213 0.300608 0.563858 0.795830 0.998262 0.366638 0.372719 0.260643 0.259130 0.182609 0.181739 0.001738 0.284970 0.505647 0.739357 0.999131 0.004344 0.228497 0.493484 0.748045 1.000000 0.000869 0.231972 0.481321 0.755864 0.994787 0.304952 0.284101 0.410947 0.156522 0.253913 0.212174 0.000869 0.250217 0.485665 0.794092 1.000000 0.001738 0.281494 0.501303 0.732407 0.995656 0.004344 0.221546 0.499566 0.709818 0.999131 0.303215 0.436142 0.260643 0.260870 0.151304 0.213043 0.001738 0.275413 0.501303 0.726325 0.999131 0.004344 0.238923 0.502172 0.757602 1.000000 0.000869 0.231972 0.481321 0.755864 0.994787 0.047785 0.086012 0.075586 0.062554 0.062554 0.050391 0.047785 0.054735 0.074718 0.063423 0.043440 0.026064 0.025195 0.019983 0.037359 0.085143 0.061685 0.021720 0.042572 0.011295 
>YBL106c
0.280198 0.391089 0.328713 0.235877 0.186323 0.251734 0.002970 0.230693 0.504950 0.774257 0.995050 0.004950 0.282178 0.515842 0.762376 0.999010 0.000990 0.225743 0.471287 0.705941 1.000000 0.550495 0.326733 0.122772 0.125867 0.034688 0.004955 0.000990 0.269307 0.487129 0.747525 1.000000 0.046535 0.238614 0.493069 0.674257 0.953465 0.010891 0.208911 0.800000 0.961386 0.996040 0.610891 0.340932 0.007921 0.250495 0.485149 0.720792 0.998020 0.398020 0.368317 0.233663 0.298315 0.195243 0.167493 0.004950 0.296040 0.539604 0.763366 0.999010 0.007921 0.229703 0.490099 0.741584 0.998020 0.000990 0.211881 0.460396 0.719802 1.000000 0.359406 0.338614 0.301980 0.243806 0.222002 0.218038 0.000990 0.214851 0.456436 0.717822 1.000000 0.004950 0.310891 0.530693 0.763366 0.999010 0.002970 0.228713 0.492079 0.753465 0.995050 0.337624 0.428713 0.233663 0.289395 0.168484 0.194252 0.004950 0.311881 0.551485 0.763366 0.999010 0.007921 0.237624 0.472277 0.743564 0.998020 0.000990 0.211881 0.460396 0.719802 1.000000 0.040594 0.066337 0.046535 0.045545 0.029703 0.051485 0.064356 0.059406 0.094059 0.074257 0.046535 0.021782 0.030693 0.013861 0.064356 0.085149 0.091089 0.019802 0.046535 0.007921 
>YBL107c
0.464286 0.275510 0.260204 0.225641 0.225641 0.138462 0.015306 0.316327 0.545918 0.755102 0.994898 0.035714 0.163265 0.494898 0.688776 1.000000 0.005102 0.198980 0.413265 0.760204 0.979592 0.494898 0.025510 0.479592 0.015385 0.117949 0.005128 0.005102 0.142857 0.443878 0.678571 1.000000 0.153061 0.153061 0.158163 0.163265 0.846939 0.066327 0.311224 0.510204 0.780612 0.974490 0.341837 0.441026 0.040816 0.244898 0.489796 0.780612 0.979592 0.336735 0.413265 0.250000 0.287179 0.158974 0.246154 0.015306 0.173469 0.505102 0.688776 1.000000 0.010204 0.295918 0.489796 0.785714 0.994898 0.005102 0.270408 0.454082 0.719388 0.984694 0.285714 0.244898 0.469388 0.143590 0.251282 0.200000 0.005102 0.224490 0.438776 0.760204 0.979592 0.035714 0.153061 0.494898 0.688776 1.000000 0.015306 0.316327 0.545918 0.755102 0.994898 0.270408 0.479592 0.250000 0.261538 0.112821 0.292308 0.015306 0.173469 0.525510 0.709184 1.000000 0.010204 0.244898 0.489796 0.775510 0.994898 0.005102 0.270408 0.454082 0.719388 0.984694 0.071429 0.081633 0.091837 0.061224 0.061224 0.096939 0.025510 0.051020 0.045918 0.086735 0.035714 0.005102 0.025510 0.030612 0.025510 0.071429 0.066327 0.010204 0.040816 0.015306 
>YBL108w
0.227723 0.336634 0.435644 0.170000 0.190000 0.240000 0.019802 0.168317 0.544554 0.693069 0.990099 0.099010 0.346535 0.514851 0.782178 1.000000 0.009901 0.188119 0.445545 0.683168 0.970297 0.574257 0.217822 0.207921 0.090000 0.050000 0.010000 0.009901 0.425743 0.574257 0.782178 1.000000 0.029703 0.069307 0.316832 0.752475 0.960396 0.089109 0.128713 0.178218 0.227723 0.910891 0.683168 0.340000 0.029703 0.198020 0.386139 0.683168 0.970297 0.356436 0.316832 0.326733 0.230000 0.200000 0.170000 0.099010 0.366337 0.524752 0.782178 1.000000 0.019802 0.207921 0.465347 0.732673 0.990099 0.009901 0.158416 0.386139 0.613861 0.900990 0.475248 0.257426 0.267327 0.220000 0.230000 0.170000 0.009901 0.188119 0.386139 0.683168 0.970297 0.099010 0.366337 0.524752 0.782178 1.000000 0.019802 0.168317 0.544554 0.712871 0.990099 0.207921 0.465347 0.326733 0.210000 0.100000 0.270000 0.099010 0.346535 0.435644 0.722772 1.000000 0.019802 0.267327 0.524752 0.772277 0.990099 0.009901 0.158416 0.386139 0.613861 0.900990 0.059406 0.059406 0.059406 0.019802 0.000000 0.029703 0.049505 0.059406 0.069307 0.009901 0.069307 0.039604 0.039604 0.079208 0.059406 0.118812 0.049505 0.029703 0.079208 0.019802 
>YBL109w
0.099099 0.603604 0.297297 0.100000 0.081818 0.381818 0.036036 0.117117 0.279279 0.630631 0.765766 0.018018 0.261261 0.513514 0.720721 1.000000 0.009009 0.225225 0.459459 0.810811 0.963964 0.738739 0.144144 0.117117 0.090909 0.018182 0.000000 0.009009 0.225225 0.414414 0.621622 1.000000 0.144144 0.171171 0.558559 0.675676 0.792793 0.855856 0.873874 0.900901 0.927928 0.963964 0.675676 0.400000 0.027027 0.333333 0.576577 0.801802 0.981982 0.414414 0.315315 0.270270 0.290909 0.163636 0.163636 0.018018 0.207207 0.423423 0.594595 0.990991 0.027027 0.243243 0.459459 0.765766 0.954955 0.009009 0.261261 0.621622 0.792793 1.000000 0.405405 0.387387 0.207207 0.345455 0.218182 0.109091 0.009009 0.225225 0.504505 0.810811 1.000000 0.018018 0.216216 0.423423 0.594595 0.990991 0.036036 0.279279 0.621622 0.747748 0.891892 0.252252 0.477477 0.270270 0.263636 0.081818 0.245455 0.018018 0.207207 0.414414 0.585586 0.927928 0.027027 0.252252 0.459459 0.756757 0.990991 0.009009 0.261261 0.621622 0.792793 1.000000 0.018018 0.000000 0.000000 0.009009 0.027027 0.045045 0.000000 0.000000 0.126126 0.117117 0.144144 0.108108 0.108108 0.018018 0.018018 0.153153 0.072072 0.018018 0.018018 0.000000 
>YBL111c
0.337331 0.337331 0.325337 0.205706 0.226727 0.234234 0.002999 0.220390 0.454273 0.733133 0.994003 0.005997 0.271364 0.511244 0.751124 1.000000 0.001499 0.229385 0.536732 0.749625 0.998501 0.464768 0.112444 0.422789 0.036036 0.096096 0.012012 0.001499 0.212894 0.469265 0.704648 1.000000 0.049475 0.118441 0.622189 0.743628 0.974513 0.008996 0.296852 0.526237 0.791604 0.965517 0.536732 0.408408 0.013493 0.272864 0.554723 0.746627 0.998501 0.355322 0.358321 0.286357 0.267267 0.174174 0.219219 0.005997 0.271364 0.505247 0.730135 0.998501 0.004498 0.230885 0.526237 0.760120 0.997001 0.001499 0.208396 0.442279 0.728636 1.000000 0.362819 0.278861 0.358321 0.205706 0.276276 0.175676 0.001499 0.227886 0.527736 0.742129 0.998501 0.005997 0.271364 0.515742 0.766117 0.995502 0.002999 0.226387 0.472264 0.748126 1.000000 0.295352 0.418291 0.286357 0.259760 0.145646 0.247748 0.005997 0.269865 0.494753 0.739130 0.995502 0.004498 0.238381 0.526237 0.758621 0.998501 0.001499 0.208396 0.442279 0.728636 1.000000 0.068966 0.074963 0.071964 0.055472 0.022489 0.043478 0.053973 0.056972 0.076462 0.052474 0.038981 0.020990 0.037481 0.020990 0.071964 0.097451 0.050975 0.017991 0.056972 0.008996 
>YBL112c
0.352381 0.247619 0.400000 0.182692 0.221154 0.182692 0.019048 0.266667 0.514286 0.723810 0.971429 0.057143 0.371429 0.552381 0.771429 0.980952 0.009524 0.190476 0.361905 0.695238 1.000000 0.495238 0.085714 0.419048 0.057692 0.115385 0.000000 0.009524 0.390476 0.609524 0.809524 1.000000 0.019048 0.028571 0.047619 0.076190 0.695238 0.152381 0.247619 0.447619 0.733333 0.942857 0.628571 0.269231 0.028571 0.190476 0.361905 0.647619 0.942857 0.304762 0.428571 0.266667 0.269231 0.163462 0.230769 0.057143 0.371429 0.552381 0.809524 1.000000 0.019048 0.180952 0.333333 0.647619 0.990476 0.009524 0.266667 0.561905 0.819048 0.971429 0.419048 0.228571 0.352381 0.163462 0.221154 0.182692 0.009524 0.200000 0.390476 0.733333 1.000000 0.057143 0.371429 0.552381 0.780952 0.980952 0.019048 0.266667 0.514286 0.723810 0.971429 0.228571 0.504762 0.266667 0.250000 0.134615 0.259615 0.057143 0.247619 0.485714 0.704762 0.961905 0.019048 0.219048 0.438095 0.695238 1.000000 0.009524 0.266667 0.561905 0.819048 0.971429 0.076190 0.085714 0.066667 0.038095 0.047619 0.038095 0.104762 0.028571 0.028571 0.028571 0.038095 0.000000 0.019048 0.038095 0.057143 0.133333 0.085714 0.047619 0.009524 0.028571 
>YBL113c
0.313131 0.472222 0.214646 0.271808 0.166877 0.147914 0.002525 0.271465 0.550505 0.768939 1.000000 0.013889 0.214646 0.381313 0.606061 0.998737 0.001263 0.539141 0.686869 0.866162 0.997475 0.694444 0.044192 0.261364 0.013906 0.044248 0.003793 0.001263 0.172980 0.347222 0.520202 1.000000 0.590909 0.681818 0.724747 0.839646 0.988636 0.577020 0.695707 0.791667 0.892677 0.967172 0.275253 0.179520 0.017677 0.623737 0.753788 0.893939 0.989899 0.486111 0.318182 0.195707 0.288243 0.111252 0.158028 0.002525 0.203283 0.373737 0.588384 0.998737 0.003788 0.286616 0.585859 0.804293 1.000000 0.001263 0.539141 0.685606 0.823232 0.994949 0.242424 0.430556 0.327020 0.125158 0.199747 0.251580 0.001263 0.549242 0.686869 0.861111 0.997475 0.013889 0.207071 0.353535 0.507576 0.998737 0.002525 0.271465 0.556818 0.780303 1.000000 0.455808 0.348485 0.195707 0.278129 0.093552 0.175727 0.002525 0.203283 0.362374 0.522727 0.998737 0.003788 0.286616 0.597222 0.805556 1.000000 0.001263 0.539141 0.685606 0.823232 0.994949 0.059343 0.040404 0.063131 0.040404 0.030303 0.079545 0.032828 0.084596 0.126263 0.171717 0.015152 0.013889 0.027778 0.015152 0.050505 0.061869 0.032828 0.017677 0.025253 0.011364 
>YBL113w-a
0.237500 0.325000 0.437500 0.150943 0.251572 0.220126 0.031250 0.168750 0.400000 0.625000 0.968750 0.018750 0.275000 0.550000 0.718750 1.000000 0.006250 0.281250 0.481250 0.806250 0.987500 0.350000 0.193750 0.456250 0.062893 0.075472 0.012579 0.006250 0.175000 0.487500 0.681250 1.000000 0.243750 0.450000 0.612500 0.743750 0.837500 0.025000 0.206250 0.406250 0.787500 0.968750 0.625000 0.339623 0.037500 0.300000 0.525000 0.787500 0.962500 0.312500 0.400000 0.287500 0.270440 0.163522 0.245283 0.018750 0.231250 0.525000 0.675000 1.000000 0.037500 0.268750 0.493750 0.750000 0.987500 0.006250 0.218750 0.443750 0.787500 0.993750 0.468750 0.256250 0.275000 0.201258 0.283019 0.132075 0.006250 0.287500 0.493750 0.806250 0.987500 0.018750 0.175000 0.525000 0.675000 1.000000 0.031250 0.181250 0.400000 0.668750 0.993750 0.225000 0.487500 0.287500 0.251572 0.106918 0.301887 0.025000 0.150000 0.550000 0.700000 1.000000 0.018750 0.275000 0.493750 0.725000 0.987500 0.006250 0.218750 0.443750 0.787500 0.993750 0.056250 0.031250 0.012500 0.031250 0.075000 0.031250 0.012500 0.050000 0.100000 0.031250 0.062500 0.037500 0.031250 0.025000 0.075000 0.137500 0.068750 0.018750 0.106250 0.006250 
>YBR001c
0.337179 0.379487 0.283333 0.272144 0.192555 0.236200 0.003846 0.196154 0.457692 0.714103 0.994872 0.007692 0.275641 0.521795 0.775641 0.998718 0.001282 0.278205 0.507692 0.750000 1.000000 0.498718 0.083333 0.417949 0.041078 0.087291 0.002567 0.001282 0.146154 0.411538 0.742308 1.000000 0.010256 0.194872 0.257692 0.485897 0.935897 0.048718 0.384615 0.600000 0.776923 0.996154 0.542308 0.354300 0.005128 0.306410 0.525641 0.767949 0.997436 0.364103 0.348718 0.287179 0.277279 0.197689 0.206675 0.003846 0.244872 0.502564 0.769231 0.991026 0.002564 0.243590 0.466667 0.711538 1.000000 0.001282 0.252564 0.534615 0.756410 0.998718 0.344872 0.294872 0.360256 0.219512 0.247754 0.211810 0.001282 0.297436 0.525641 0.757692 1.000000 0.007692 0.247436 0.505128 0.779487 0.991026 0.003846 0.196154 0.462821 0.707692 0.994872 0.305128 0.407692 0.287179 0.269576 0.164313 0.240051 0.003846 0.228205 0.505128 0.767949 0.991026 0.002564 0.255128 0.470513 0.716667 1.000000 0.001282 0.252564 0.534615 0.756410 0.998718 0.058974 0.062821 0.074359 0.060256 0.026923 0.053846 0.064103 0.060256 0.065385 0.055128 0.050000 0.023077 0.061538 0.008974 0.048718 0.094872 0.050000 0.021795 0.043590 0.015385 
>YBR002c
0.342657 0.321678 0.335664 0.210526 0.242105 0.217544 0.006993 0.255245 0.496503 0.786713 1.000000 0.010490 0.227273 0.513986 0.699301 0.968531 0.003497 0.244755 0.482517 0.762238 0.996503 0.405594 0.125874 0.468531 0.042105 0.084211 0.000000 0.003497 0.297203 0.678322 0.828671 1.000000 0.118881 0.279720 0.444056 0.562937 0.807692 0.041958 0.220280 0.405594 0.615385 0.986014 0.569930 0.364912 0.017483 0.237762 0.479021 0.730769 0.979021 0.346154 0.370629 0.283217 0.252632 0.210526 0.221053 0.010490 0.227273 0.489510 0.727273 0.975524 0.006993 0.304196 0.510490 0.762238 1.000000 0.003497 0.178322 0.430070 0.758741 0.993007 0.356643 0.276224 0.367133 0.210526 0.277193 0.189474 0.003497 0.248252 0.493007 0.762238 0.996503 0.010490 0.220280 0.475524 0.699301 0.968531 0.006993 0.241259 0.496503 0.772727 1.000000 0.300699 0.416084 0.283217 0.228070 0.185965 0.245614 0.010490 0.227273 0.475524 0.709790 0.975524 0.006993 0.300699 0.524476 0.765734 1.000000 0.003497 0.178322 0.430070 0.758741 0.993007 0.076923 0.073427 0.094406 0.052448 0.010490 0.034965 0.062937 0.055944 0.073427 0.055944 0.027972 0.024476 0.020979 0.017483 0.055944 0.104895 0.069930 0.024476 0.048951 0.013986 
>YBR003w
0.319239 0.367865 0.312896 0.239407 0.199153 0.243644 0.006342 0.268499 0.528541 0.771670 1.000000 0.010571 0.247357 0.477801 0.723044 0.993658 0.002114 0.213531 0.496829 0.744186 0.991543 0.291755 0.006342 0.701903 0.002119 0.112288 0.002119 0.002114 0.217759 0.435518 0.716702 1.000000 0.458774 0.458774 0.458774 0.460888 0.463002 0.014799 0.264271 0.520085 0.756871 0.993658 0.617336 0.360169 0.012685 0.293869 0.492600 0.716702 0.995772 0.386892 0.376321 0.236786 0.296610 0.203390 0.177966 0.010571 0.266385 0.517970 0.771670 0.993658 0.006342 0.234672 0.505285 0.729387 0.991543 0.002114 0.217759 0.456660 0.739958 1.000000 0.329810 0.319239 0.350951 0.218220 0.228814 0.226695 0.002114 0.213531 0.507400 0.739958 0.991543 0.010571 0.247357 0.477801 0.746300 0.993658 0.006342 0.268499 0.511628 0.750529 1.000000 0.319239 0.443975 0.236786 0.271186 0.169492 0.211864 0.010571 0.285412 0.536998 0.786469 0.993658 0.006342 0.247357 0.496829 0.725159 0.991543 0.002114 0.217759 0.456660 0.739958 1.000000 0.059197 0.071882 0.059197 0.057082 0.027484 0.044397 0.050740 0.073996 0.090909 0.046512 0.057082 0.031712 0.016913 0.010571 0.052854 0.120507 0.071882 0.016913 0.035941 0.004228 
>YBR004c
0.214781 0.346420 0.438799 0.155093 0.150463 0.324074 0.030023 0.200924 0.454965 0.732102 0.974596 0.009238 0.277136 0.501155 0.729792 1.000000 0.002309 0.254042 0.498845 0.759815 0.993072 0.244804 0.039261 0.715935 0.011574 0.090278 0.011574 0.002309 0.230947 0.551963 0.785219 1.000000 0.006928 0.357968 0.720554 0.877598 0.949192 0.009238 0.247113 0.487298 0.741339 0.986143 0.785219 0.171296 0.004619 0.251732 0.487298 0.729792 0.993072 0.311778 0.378753 0.309469 0.238426 0.194444 0.243056 0.009238 0.281755 0.491917 0.729792 1.000000 0.004619 0.230947 0.505774 0.757506 0.993072 0.002309 0.242494 0.494226 0.743649 0.990762 0.501155 0.272517 0.226328 0.273148 0.182870 0.136574 0.002309 0.258661 0.517321 0.759815 0.993072 0.009238 0.281755 0.484988 0.727483 1.000000 0.030023 0.200924 0.464203 0.734411 0.974596 0.249423 0.441109 0.309469 0.201389 0.162037 0.275463 0.009238 0.256351 0.454965 0.699769 1.000000 0.004619 0.240185 0.519630 0.759815 0.997691 0.002309 0.242494 0.494226 0.743649 0.990762 0.032333 0.057737 0.023095 0.020785 0.034642 0.046189 0.030023 0.050808 0.099307 0.048499 0.043880 0.011547 0.062356 0.018476 0.053118 0.129330 0.092379 0.009238 0.103926 0.032333 
>YBR005w
0.314554 0.441315 0.244131 0.264151 0.113208 0.183962 0.032864 0.314554 0.530516 0.779343 0.995305 0.009390 0.276995 0.521127 0.751174 1.000000 0.004695 0.206573 0.281690 0.671362 0.981221 0.652582 0.112676 0.234742 0.066038 0.047170 0.000000 0.004695 0.403756 0.596244 0.802817 1.000000 0.018779 0.122066 0.455399 0.737089 0.981221 0.037559 0.183099 0.244131 0.300469 0.967136 0.380282 0.396226 0.014085 0.267606 0.483568 0.708920 0.981221 0.413146 0.361502 0.225352 0.264151 0.174528 0.160377 0.009390 0.338028 0.563380 0.784038 1.000000 0.014085 0.230047 0.497653 0.746479 0.985915 0.004695 0.197183 0.352113 0.586854 0.995305 0.295775 0.366197 0.338028 0.202830 0.160377 0.216981 0.004695 0.201878 0.323944 0.652582 0.981221 0.009390 0.291080 0.549296 0.784038 1.000000 0.032864 0.314554 0.535211 0.765258 0.995305 0.333333 0.441315 0.225352 0.268868 0.160377 0.174528 0.009390 0.239437 0.516432 0.779343 1.000000 0.014085 0.253521 0.544601 0.755869 0.985915 0.004695 0.197183 0.352113 0.586854 0.995305 0.075117 0.023474 0.065728 0.042254 0.056338 0.051643 0.056338 0.079812 0.084507 0.070423 0.075117 0.023474 0.051643 0.004695 0.084507 0.061033 0.042254 0.009390 0.028169 0.014085 
>YBR006w
0.279678 0.400402 0.319920 0.219758 0.179435 0.276210 0.010060 0.187123 0.474849 0.706237 0.995976 0.004024 0.263581 0.486922 0.772636 0.997988 0.002012 0.283702 0.525151 0.766600 1.000000 0.386318 0.209256 0.404427 0.102823 0.062500 0.006048 0.002012 0.271630 0.521127 0.780684 1.000000 0.040241 0.313883 0.545272 0.810865 0.985915 0.108652 0.225352 0.450704 0.645875 0.965795 0.643863 0.375000 0.014085 0.313883 0.519115 0.770624 0.985915 0.412475 0.360161 0.227364 0.318548 0.197581 0.167339 0.004024 0.275654 0.496982 0.764588 0.997988 0.006036 0.219316 0.503018 0.750503 1.000000 0.002012 0.235412 0.474849 0.700201 0.977867 0.354125 0.352113 0.293763 0.280242 0.195565 0.219758 0.002012 0.253521 0.519115 0.768612 1.000000 0.004024 0.273642 0.486922 0.772636 0.997988 0.010060 0.193159 0.492958 0.706237 0.995976 0.338028 0.434608 0.227364 0.316532 0.167339 0.197581 0.004024 0.271630 0.515091 0.780684 0.997988 0.006036 0.249497 0.494970 0.754527 1.000000 0.002012 0.235412 0.474849 0.700201 0.977867 0.030181 0.074447 0.072435 0.038229 0.018109 0.046278 0.078471 0.084507 0.066398 0.070423 0.052314 0.014085 0.034205 0.022133 0.080483 0.082495 0.060362 0.018109 0.048290 0.008048 
>YBR007c
0.364130 0.419837 0.216033 0.291156 0.164626 0.190476 0.002717 0.232337 0.452446 0.713315 1.000000 0.010870 0.274457 0.493207 0.725543 0.998641 0.001359 0.240489 0.570652 0.819293 0.993207 0.668478 0.081522 0.250000 0.044898 0.061224 0.001361 0.001359 0.258152 0.444293 0.665761 1.000000 0.063859 0.222826 0.380435 0.599185 0.940217 0.013587 0.240489 0.774457 0.858696 0.991848 0.354620 0.353741 0.006793 0.240489 0.623641 0.835598 0.993207 0.434783 0.308424 0.256793 0.280272 0.223129 0.152381 0.010870 0.274457 0.504076 0.744565 0.998641 0.002717 0.190217 0.414402 0.735054 0.995924 0.001359 0.273098 0.525815 0.763587 1.000000 0.245924 0.366848 0.387228 0.179592 0.205442 0.274830 0.001359 0.233696 0.558424 0.816576 0.993207 0.010870 0.275815 0.487772 0.718750 0.998641 0.002717 0.237772 0.470109 0.717391 1.000000 0.362772 0.380435 0.256793 0.282993 0.185034 0.190476 0.010870 0.258152 0.498641 0.745924 0.997283 0.002717 0.216033 0.456522 0.735054 0.998641 0.001359 0.273098 0.525815 0.763587 1.000000 0.050272 0.093750 0.058424 0.054348 0.029891 0.077446 0.040761 0.052989 0.135870 0.078804 0.058424 0.023098 0.029891 0.013587 0.016304 0.086957 0.039402 0.020380 0.033967 0.005435 
>YBR008c
0.208029 0.385036 0.406934 0.160878 0.129799 0.314442 0.014599 0.135036 0.403285 0.600365 1.000000 0.005474 0.251825 0.467153 0.781022 0.996350 0.001825 0.324818 0.529197 0.768248 0.983577 0.270073 0.036496 0.693431 0.014625 0.073126 0.007313 0.001825 0.093066 0.169708 0.569343 1.000000 0.005474 0.018248 0.031022 0.151460 0.562044 0.023723 0.372263 0.596715 0.791971 0.992701 0.750000 0.146252 0.005474 0.324818 0.545620 0.779197 0.990876 0.379562 0.357664 0.262774 0.272395 0.184644 0.179159 0.007299 0.220803 0.456204 0.766423 0.996350 0.003650 0.239051 0.470803 0.722628 1.000000 0.001825 0.310219 0.556569 0.768248 0.994526 0.459854 0.317518 0.222628 0.296161 0.170018 0.131627 0.001825 0.317518 0.558394 0.770073 0.994526 0.007299 0.257299 0.456204 0.781022 0.996350 0.014599 0.138686 0.403285 0.600365 1.000000 0.299270 0.437956 0.262774 0.265082 0.144424 0.219378 0.007299 0.226277 0.456204 0.751825 0.996350 0.003650 0.233577 0.470803 0.733577 1.000000 0.001825 0.310219 0.556569 0.768248 0.994526 0.043796 0.029197 0.047445 0.034672 0.018248 0.034672 0.069343 0.076642 0.062044 0.056569 0.052920 0.014599 0.052920 0.027372 0.076642 0.114964 0.065693 0.027372 0.076642 0.018248 
>YBR009c
0.339806 0.398058 0.262136 0.274510 0.156863 0.245098 0.038835 0.203883 0.398058 0.669903 0.932039 0.019417 0.155340 0.475728 0.747573 1.000000 0.009709 0.291262 0.533981 0.689320 0.980583 0.446602 0.067961 0.485437 0.058824 0.078431 0.000000 0.009709 0.106796 0.223301 0.485437 1.000000 0.446602 0.446602 0.786408 0.941748 0.961165 0.252427 0.378641 0.592233 0.708738 0.902913 0.407767 0.411765 0.116505 0.368932 0.572816 0.747573 0.980583 0.368932 0.300971 0.330097 0.245098 0.294118 0.166667 0.019417 0.145631 0.466019 0.747573 1.000000 0.106796 0.291262 0.524272 0.689320 0.951456 0.009709 0.184466 0.436893 0.737864 0.980583 0.300971 0.339806 0.359223 0.254902 0.166667 0.245098 0.009709 0.339806 0.563107 0.796117 0.980583 0.019417 0.135922 0.417476 0.747573 1.000000 0.038835 0.203883 0.398058 0.669903 0.932039 0.359223 0.310680 0.330097 0.254902 0.284314 0.176471 0.019417 0.145631 0.466019 0.747573 1.000000 0.106796 0.320388 0.524272 0.689320 0.951456 0.009709 0.184466 0.436893 0.737864 0.980583 0.135922 0.106796 0.038835 0.029126 0.019417 0.009709 0.155340 0.058252 0.058252 0.058252 0.009709 0.019417 0.038835 0.000000 0.077670 0.087379 0.067961 0.009709 0.019417 0.000000 
>YBR010w
0.389706 0.375000 0.235294 0.244444 0.229630 0.162963 0.022059 0.272059 0.507353 0.779412 0.992647 0.014706 0.169118 0.323529 0.676471 1.000000 0.007353 0.448529 0.580882 0.764706 0.963235 0.455882 0.029412 0.514706 0.029630 0.088889 0.000000 0.007353 0.147059 0.264706 0.463235 1.000000 0.617647 0.617647 0.625000 0.875000 0.882353 0.036765 0.419118 0.654412 0.779412 0.963235 0.426471 0.444444 0.058824 0.382353 0.632353 0.764706 0.963235 0.375000 0.308824 0.316176 0.222222 0.200000 0.207407 0.014706 0.169118 0.338235 0.676471 1.000000 0.044118 0.441176 0.610294 0.764706 0.985294 0.007353 0.198529 0.404412 0.735294 0.992647 0.250000 0.345588 0.404412 0.155556 0.251852 0.237037 0.007353 0.404412 0.580882 0.750000 0.963235 0.014706 0.161765 0.323529 0.669118 1.000000 0.022059 0.272059 0.507353 0.786765 0.992647 0.338235 0.345588 0.316176 0.244444 0.162963 0.244444 0.014706 0.169118 0.426471 0.705882 1.000000 0.044118 0.375000 0.544118 0.750000 0.985294 0.007353 0.198529 0.404412 0.735294 0.992647 0.125000 0.117647 0.051471 0.029412 0.058824 0.007353 0.051471 0.117647 0.073529 0.066176 0.036765 0.014706 0.014706 0.000000 0.044118 0.095588 0.051471 0.007353 0.036765 0.000000 
>YBR011c
0.351916 0.372822 0.275261 0.269231 0.213287 0.213287 0.020906 0.222997 0.477352 0.703833 0.972125 0.006969 0.299652 0.505226 0.818815 0.996516 0.003484 0.229965 0.491289 0.679443 1.000000 0.508711 0.299652 0.191638 0.178322 0.052448 0.003497 0.003484 0.236934 0.445993 0.818815 1.000000 0.010453 0.149826 0.324042 0.498258 0.979094 0.578397 0.641115 0.721254 0.783972 0.968641 0.609756 0.307692 0.020906 0.212544 0.421603 0.648084 0.982578 0.400697 0.348432 0.250871 0.297203 0.220280 0.153846 0.006969 0.331010 0.567944 0.836237 0.996516 0.024390 0.219512 0.449477 0.651568 1.000000 0.003484 0.198606 0.456446 0.717770 0.982578 0.313589 0.313589 0.372822 0.220280 0.241259 0.255245 0.003484 0.209059 0.480836 0.672474 1.000000 0.006969 0.310105 0.571429 0.836237 0.996516 0.020906 0.222997 0.466899 0.703833 0.972125 0.327526 0.421603 0.250871 0.279720 0.181818 0.192308 0.006969 0.334495 0.567944 0.829268 0.996516 0.024390 0.229965 0.449477 0.668990 1.000000 0.003484 0.198606 0.456446 0.717770 0.982578 0.020906 0.101045 0.066202 0.083624 0.024390 0.055749 0.055749 0.076655 0.045296 0.066202 0.069686 0.020906 0.038328 0.003484 0.048780 0.059233 0.094077 0.010453 0.038328 0.020906 
>YBR012c
0.366906 0.338129 0.294964 0.268116 0.210145 0.210145 0.014388 0.158273 0.431655 0.683453 0.992806 0.050360 0.258993 0.489209 0.791367 0.985612 0.007194 0.266187 0.510791 0.712230 1.000000 0.568345 0.230216 0.201439 0.108696 0.050725 0.007246 0.007194 0.237410 0.553957 0.784173 1.000000 0.028777 0.194245 0.280576 0.827338 0.935252 0.129496 0.388489 0.474820 0.525180 0.769784 0.561151 0.405797 0.028777 0.266187 0.496403 0.755396 0.978417 0.338129 0.395683 0.266187 0.282609 0.137681 0.231884 0.050360 0.280576 0.489209 0.719424 0.985612 0.014388 0.215827 0.467626 0.755396 1.000000 0.007194 0.143885 0.460432 0.712230 0.992806 0.374101 0.237410 0.388489 0.181159 0.311594 0.152174 0.007194 0.266187 0.503597 0.726619 1.000000 0.050360 0.258993 0.489209 0.733813 0.985612 0.014388 0.165468 0.446043 0.741007 0.992806 0.280576 0.453237 0.266187 0.289855 0.101449 0.268116 0.050360 0.258993 0.474820 0.705036 0.985612 0.014388 0.266187 0.510791 0.748201 1.000000 0.007194 0.143885 0.460432 0.712230 0.992806 0.050360 0.050360 0.050360 0.057554 0.043165 0.115108 0.050360 0.043165 0.100719 0.028777 0.014388 0.021583 0.079137 0.043165 0.064748 0.071942 0.050360 0.021583 0.028777 0.014388 
>YBR012w-a
0.322727 0.461364 0.215909 0.305239 0.141230 0.189066 0.004545 0.334091 0.602273 0.815909 0.995455 0.006818 0.193182 0.381818 0.725000 1.000000 0.002273 0.311364 0.515909 0.690909 0.988636 0.688636 0.031818 0.279545 0.022779 0.054670 0.000000 0.002273 0.190909 0.363636 0.756818 1.000000 0.040909 0.045455 0.865909 0.872727 0.970455 0.009091 0.515909 0.613636 0.727273 0.909091 0.386364 0.332574 0.013636 0.259091 0.490909 0.659091 0.988636 0.445455 0.329545 0.225000 0.287016 0.200456 0.154897 0.006818 0.209091 0.400000 0.702273 0.997727 0.004545 0.293182 0.570455 0.756818 0.995455 0.002273 0.272727 0.536364 0.759091 1.000000 0.259091 0.388636 0.352273 0.186788 0.195900 0.277904 0.002273 0.277273 0.513636 0.700000 1.000000 0.006818 0.190909 0.372727 0.684091 0.997727 0.004545 0.288636 0.602273 0.815909 0.995455 0.340909 0.434091 0.225000 0.287016 0.150342 0.205011 0.006818 0.225000 0.461364 0.725000 0.997727 0.004545 0.222727 0.493182 0.720455 0.995455 0.002273 0.272727 0.536364 0.759091 1.000000 0.031818 0.056818 0.036364 0.050000 0.061364 0.086364 0.034091 0.052273 0.118182 0.086364 0.097727 0.029545 0.043182 0.006818 0.040909 0.052273 0.052273 0.027273 0.029545 0.006818 
>YBR012w-b
0.335991 0.402620 0.261390 0.275783 0.182336 0.209117 0.001139 0.257403 0.533599 0.751708 0.998292 0.001708 0.216401 0.461845 0.693622 1.000000 0.000569 0.292711 0.515945 0.804100 0.999431 0.612187 0.142369 0.245444 0.055840 0.047863 0.003419 0.000569 0.226082 0.512528 0.671982 1.000000 0.010251 0.316059 0.496583 0.801253 0.984624 0.002278 0.195330 0.457859 0.850797 0.998861 0.472096 0.366952 0.003417 0.284738 0.493736 0.797267 0.998861 0.393508 0.357062 0.249431 0.282621 0.190313 0.175499 0.001708 0.220387 0.464123 0.681093 0.997153 0.001139 0.266515 0.524487 0.784738 0.999431 0.000569 0.287016 0.522210 0.776765 1.000000 0.305239 0.324601 0.370159 0.193732 0.235328 0.246154 0.000569 0.294419 0.514806 0.799544 0.999431 0.001708 0.207859 0.457859 0.668565 0.997153 0.001139 0.257403 0.527904 0.746014 1.000000 0.321754 0.428815 0.249431 0.269516 0.158974 0.206838 0.001708 0.234624 0.470957 0.694191 0.997153 0.001139 0.246583 0.505125 0.767654 0.999431 0.000569 0.287016 0.522210 0.776765 1.000000 0.041572 0.073462 0.047267 0.060364 0.042711 0.070615 0.038724 0.045558 0.101936 0.075171 0.063212 0.034169 0.043850 0.008542 0.041572 0.082574 0.072323 0.018223 0.030182 0.007973 
>YBR013c
0.279070 0.379845 0.341085 0.218750 0.171875 0.257812 0.054264 0.333333 0.550388 0.782946 0.992248 0.023256 0.248062 0.457364 0.643411 1.000000 0.007752 0.124031 0.449612 0.775194 0.984496 0.379845 0.054264 0.565891 0.031250 0.078125 0.000000 0.007752 0.279070 0.403101 0.550388 1.000000 0.248062 0.248062 0.263566 0.310078 0.325581 0.031008 0.162791 0.689922 0.829457 0.976744 0.573643 0.453125 0.023256 0.155039 0.496124 0.736434 0.984496 0.356589 0.434109 0.209302 0.328125 0.171875 0.156250 0.031008 0.224806 0.434109 0.620155 0.976744 0.015504 0.255814 0.527132 0.790698 0.992248 0.007752 0.147287 0.519380 0.821705 1.000000 0.410853 0.294574 0.294574 0.289062 0.210938 0.179688 0.007752 0.147287 0.480620 0.775194 1.000000 0.031008 0.224806 0.426357 0.620155 0.976744 0.054264 0.317829 0.550388 0.782946 0.992248 0.294574 0.496124 0.209302 0.320312 0.132812 0.195312 0.093023 0.248062 0.441860 0.620155 0.976744 0.015504 0.240310 0.511628 0.782946 0.992248 0.007752 0.147287 0.519380 0.821705 1.000000 0.023256 0.038760 0.038760 0.023256 0.038760 0.116279 0.038760 0.069767 0.093023 0.069767 0.023256 0.015504 0.069767 0.038760 0.031008 0.124031 0.085271 0.023256 0.038760 0.000000 
>YBR014c
0.339901 0.379310 0.280788 0.272277 0.163366 0.158416 0.029557 0.315271 0.472906 0.729064 0.990148 0.009852 0.285714 0.536946 0.768473 1.000000 0.004926 0.108374 0.418719 0.655172 0.955665 0.458128 0.187192 0.354680 0.084158 0.054455 0.024752 0.004926 0.241379 0.354680 0.669951 1.000000 0.009852 0.064039 0.497537 0.773399 0.960591 0.073892 0.433498 0.586207 0.832512 0.926108 0.463054 0.356436 0.014778 0.206897 0.512315 0.719212 0.926108 0.379310 0.394089 0.226601 0.267327 0.183168 0.158416 0.009852 0.285714 0.522167 0.793103 1.000000 0.014778 0.142857 0.413793 0.714286 0.990148 0.004926 0.290640 0.551724 0.729064 0.960591 0.310345 0.315271 0.374384 0.178218 0.183168 0.252475 0.004926 0.113300 0.467980 0.655172 0.955665 0.009852 0.280788 0.527094 0.798030 1.000000 0.029557 0.295567 0.472906 0.729064 0.990148 0.344828 0.428571 0.226601 0.292079 0.168317 0.173267 0.009852 0.285714 0.522167 0.802956 1.000000 0.014778 0.152709 0.443350 0.704433 0.990148 0.004926 0.290640 0.551724 0.729064 0.960591 0.034483 0.068966 0.073892 0.059113 0.029557 0.073892 0.049261 0.064039 0.093596 0.078818 0.029557 0.034483 0.029557 0.004926 0.093596 0.068966 0.054187 0.014778 0.039409 0.004926 
>YBR015c
0.335008 0.368509 0.296482 0.244966 0.186242 0.204698 0.008375 0.226131 0.529313 0.792295 1.000000 0.006700 0.257956 0.505863 0.720268 0.998325 0.001675 0.259631 0.460637 0.726968 0.994975 0.490787 0.122278 0.386935 0.053691 0.077181 0.010067 0.001675 0.284757 0.537688 0.767169 1.000000 0.043551 0.380235 0.530988 0.726968 0.938023 0.005025 0.180905 0.373534 0.748744 0.994975 0.557789 0.379195 0.005025 0.311558 0.519263 0.730318 0.993300 0.381910 0.335008 0.283082 0.265101 0.204698 0.197987 0.006700 0.247906 0.502513 0.718593 0.998325 0.003350 0.246231 0.469012 0.752094 0.994975 0.001675 0.249581 0.510888 0.775544 1.000000 0.356784 0.289782 0.353434 0.194631 0.246644 0.191275 0.001675 0.246231 0.475712 0.731993 0.994975 0.006700 0.266332 0.482412 0.690117 0.998325 0.008375 0.231156 0.530988 0.792295 1.000000 0.328308 0.388610 0.283082 0.256711 0.172819 0.229866 0.006700 0.244556 0.517588 0.725293 0.998325 0.003350 0.259631 0.465662 0.740369 0.994975 0.001675 0.249581 0.510888 0.775544 1.000000 0.028476 0.095477 0.056951 0.080402 0.015075 0.058626 0.058626 0.056951 0.072027 0.060302 0.041876 0.018425 0.060302 0.011725 0.055276 0.100503 0.048576 0.016750 0.056951 0.006700 
>YBR016w
0.421875 0.453125 0.125000 0.307087 0.023622 0.086614 0.031250 0.281250 0.492188 0.656250 0.976562 0.015625 0.164062 0.414062 0.640625 0.960938 0.007812 0.859375 0.921875 0.953125 1.000000 0.828125 0.015625 0.156250 0.015748 0.031496 0.000000 0.007812 0.226562 0.437500 0.640625 1.000000 0.101562 0.101562 0.101562 0.101562 0.109375 0.039062 0.875000 0.914062 0.953125 0.992188 0.328125 0.409449 0.023438 0.382812 0.617188 0.890625 0.984375 0.367188 0.421875 0.210938 0.228346 0.196850 0.165354 0.015625 0.156250 0.421875 0.828125 0.976562 0.031250 0.351562 0.546875 0.726562 0.992188 0.007812 0.148438 0.414062 0.640625 1.000000 0.242188 0.312500 0.445312 0.157480 0.110236 0.220472 0.007812 0.367188 0.679688 0.921875 1.000000 0.015625 0.156250 0.304688 0.710938 0.960938 0.031250 0.281250 0.468750 0.656250 0.976562 0.250000 0.539062 0.210938 0.188976 0.173228 0.188976 0.015625 0.093750 0.289062 0.710938 0.976562 0.031250 0.335938 0.546875 0.765625 0.992188 0.007812 0.148438 0.414062 0.640625 1.000000 0.023438 0.015625 0.023438 0.015625 0.257812 0.085938 0.109375 0.054688 0.046875 0.023438 0.078125 0.023438 0.117188 0.039062 0.015625 0.031250 0.007812 0.023438 0.007812 0.000000 
>YBR017c
0.321351 0.307190 0.371460 0.187568 0.224646 0.230098 0.006536 0.237473 0.433551 0.709150 0.996732 0.002179 0.224401 0.506536 0.770153 1.000000 0.001089 0.263617 0.527233 0.759259 0.997821 0.253813 0.008715 0.737473 0.004362 0.100327 0.002181 0.001089 0.224401 0.431373 0.749455 1.000000 0.003268 0.004357 0.395425 0.397603 0.982571 0.009804 0.250545 0.519608 0.745098 0.997821 0.594771 0.366412 0.005447 0.273420 0.529412 0.776688 0.997821 0.357298 0.431373 0.211329 0.307525 0.149400 0.174482 0.002179 0.278867 0.506536 0.754902 1.000000 0.009804 0.239651 0.490196 0.755991 0.996732 0.001089 0.234205 0.494553 0.704793 0.997821 0.394336 0.263617 0.342048 0.206107 0.250818 0.174482 0.001089 0.257081 0.526144 0.757081 0.997821 0.002179 0.232026 0.519608 0.778867 1.000000 0.006536 0.244009 0.436819 0.716776 0.996732 0.299564 0.489107 0.211329 0.281352 0.118866 0.205016 0.002179 0.275599 0.503268 0.790850 1.000000 0.007625 0.240741 0.497821 0.736383 0.996732 0.001089 0.234205 0.494553 0.704793 0.997821 0.025054 0.047930 0.069717 0.076253 0.040305 0.062092 0.038126 0.061002 0.074074 0.050109 0.040305 0.020697 0.022876 0.017429 0.055556 0.120915 0.082789 0.030501 0.051198 0.013072 
>YBR018c
0.344262 0.352459 0.303279 0.254795 0.183562 0.221918 0.010929 0.259563 0.464481 0.724044 0.997268 0.005464 0.177596 0.472678 0.762295 0.989071 0.002732 0.314208 0.543716 0.751366 1.000000 0.494536 0.199454 0.306011 0.093151 0.060274 0.000000 0.002732 0.158470 0.306011 0.696721 1.000000 0.035519 0.297814 0.500000 0.691257 0.934426 0.081967 0.420765 0.584699 0.762295 0.994536 0.565574 0.367123 0.016393 0.316940 0.540984 0.781421 0.989071 0.341530 0.382514 0.275956 0.271233 0.189041 0.208219 0.005464 0.188525 0.467213 0.737705 0.978142 0.010929 0.295082 0.532787 0.751366 1.000000 0.002732 0.210383 0.497268 0.732240 0.997268 0.344262 0.275956 0.379781 0.191781 0.246575 0.213699 0.002732 0.289617 0.543716 0.751366 1.000000 0.005464 0.177596 0.472678 0.745902 0.978142 0.010929 0.259563 0.464481 0.732240 0.997268 0.262295 0.461749 0.275956 0.238356 0.128767 0.268493 0.005464 0.218579 0.483607 0.762295 0.978142 0.010929 0.267760 0.494536 0.734973 1.000000 0.002732 0.210383 0.497268 0.732240 0.997268 0.051913 0.062842 0.065574 0.049180 0.051913 0.062842 0.032787 0.057377 0.081967 0.040984 0.062842 0.035519 0.040984 0.016393 0.054645 0.103825 0.043716 0.016393 0.049180 0.019126 
>YBR019c
0.320458 0.384835 0.294707 0.243553 0.209169 0.213467 0.005722 0.294707 0.519313 0.766810 0.997139 0.002861 0.234621 0.486409 0.743920 1.000000 0.001431 0.213162 0.482117 0.738197 0.998569 0.505007 0.283262 0.211731 0.111748 0.042980 0.005731 0.001431 0.294707 0.546495 0.808298 1.000000 0.004292 0.357654 0.636624 0.773963 0.998569 0.031474 0.145923 0.250358 0.422031 0.849785 0.602289 0.381089 0.004292 0.241774 0.454936 0.731044 0.998569 0.380544 0.377682 0.241774 0.276504 0.191977 0.150430 0.002861 0.257511 0.503577 0.753934 1.000000 0.005722 0.230329 0.502146 0.755365 0.994278 0.001431 0.261803 0.489270 0.725322 0.998569 0.350501 0.309013 0.340486 0.209169 0.267908 0.207736 0.001431 0.216023 0.473534 0.731044 0.998569 0.002861 0.241774 0.513591 0.753934 1.000000 0.005722 0.266094 0.509299 0.755365 0.997139 0.321888 0.436338 0.241774 0.259312 0.163324 0.179083 0.002861 0.258941 0.513591 0.746781 1.000000 0.005722 0.230329 0.492132 0.761087 0.994278 0.001431 0.261803 0.489270 0.725322 0.998569 0.040057 0.061516 0.062947 0.057225 0.030043 0.068670 0.077253 0.062947 0.060086 0.064378 0.044349 0.020029 0.055794 0.014306 0.071531 0.081545 0.062947 0.012876 0.042918 0.008584 
>YBR020w
0.289773 0.388258 0.321970 0.204934 0.216319 0.258065 0.005682 0.231061 0.520833 0.742424 0.998106 0.003788 0.268939 0.492424 0.753788 0.996212 0.001894 0.232955 0.482955 0.734848 1.000000 0.357955 0.151515 0.490530 0.056926 0.056926 0.000000 0.001894 0.206439 0.428030 0.672348 1.000000 0.015152 0.130682 0.195076 0.486742 0.998106 0.041667 0.375000 0.615530 0.768939 0.960227 0.581439 0.387097 0.011364 0.242424 0.439394 0.746212 0.996212 0.401515 0.363636 0.234848 0.284630 0.166983 0.187856 0.003788 0.234848 0.481061 0.780303 0.992424 0.013258 0.272727 0.520833 0.738636 1.000000 0.001894 0.240530 0.475379 0.740530 0.996212 0.359848 0.329545 0.310606 0.239089 0.258065 0.178368 0.001894 0.240530 0.494318 0.740530 1.000000 0.003788 0.268939 0.492424 0.759470 0.990530 0.005682 0.236742 0.507576 0.742424 0.998106 0.325758 0.439394 0.234848 0.301708 0.138520 0.216319 0.003788 0.268939 0.511364 0.770833 0.990530 0.013258 0.244318 0.496212 0.742424 1.000000 0.001894 0.240530 0.475379 0.740530 0.996212 0.030303 0.071970 0.064394 0.045455 0.022727 0.054924 0.060606 0.089015 0.085227 0.045455 0.049242 0.020833 0.037879 0.026515 0.085227 0.090909 0.045455 0.018939 0.049242 0.005682 
>YBR021w
0.221169 0.390205 0.388626 0.147152 0.156646 0.324367 0.004739 0.156398 0.464455 0.796209 0.995261 0.003160 0.270142 0.505529 0.747235 0.996840 0.001580 0.276461 0.502370 0.723539 1.000000 0.350711 0.044234 0.605055 0.020570 0.077532 0.001582 0.001580 0.110585 0.467615 0.805687 1.000000 0.009479 0.080569 0.124803 0.939968 0.995261 0.030016 0.320695 0.522907 0.721959 0.968404 0.761453 0.212025 0.007899 0.306477 0.521327 0.729858 0.985782 0.380727 0.334913 0.284360 0.250000 0.224684 0.204114 0.003160 0.282780 0.526066 0.744076 0.996840 0.006319 0.208531 0.469194 0.721959 1.000000 0.001580 0.246445 0.483412 0.775671 0.998420 0.440758 0.320695 0.238547 0.308544 0.191456 0.121835 0.001580 0.257504 0.503949 0.748815 1.000000 0.003160 0.278041 0.505529 0.729858 0.996840 0.004739 0.157978 0.461295 0.794629 0.995261 0.314376 0.401264 0.284360 0.232595 0.188291 0.240506 0.004739 0.268562 0.516588 0.744076 0.996840 0.003160 0.222749 0.481833 0.721959 1.000000 0.001580 0.246445 0.483412 0.775671 0.998420 0.033175 0.045814 0.037915 0.034755 0.023697 0.045814 0.058452 0.080569 0.101106 0.039494 0.041074 0.017378 0.052133 0.025276 0.069510 0.085308 0.072670 0.023697 0.077409 0.034755 
>YBR022w
0.305085 0.384181 0.310734 0.255682 0.198864 0.221591 0.016949 0.271186 0.576271 0.734463 0.994350 0.011299 0.209040 0.491525 0.723164 0.988701 0.005650 0.220339 0.446328 0.774011 1.000000 0.435028 0.152542 0.412429 0.068182 0.068182 0.000000 0.005650 0.242938 0.446328 0.757062 1.000000 0.022599 0.367232 0.463277 0.807910 0.994350 0.084746 0.231638 0.553672 0.655367 0.937853 0.553672 0.431818 0.022599 0.203390 0.463277 0.790960 0.988701 0.372881 0.361582 0.265537 0.255682 0.278409 0.181818 0.011299 0.225989 0.480226 0.694915 0.977401 0.016949 0.265537 0.457627 0.785311 1.000000 0.005650 0.237288 0.531073 0.757062 0.988701 0.378531 0.299435 0.322034 0.238636 0.272727 0.215909 0.005650 0.220339 0.440678 0.762712 1.000000 0.011299 0.203390 0.491525 0.700565 0.977401 0.016949 0.271186 0.559322 0.734463 0.994350 0.305085 0.429379 0.265537 0.198864 0.232955 0.227273 0.011299 0.225989 0.502825 0.694915 0.977401 0.016949 0.248588 0.440678 0.774011 1.000000 0.005650 0.237288 0.531073 0.757062 0.988701 0.028249 0.090395 0.073446 0.039548 0.022599 0.050847 0.090395 0.033898 0.096045 0.045198 0.033898 0.016949 0.067797 0.033898 0.033898 0.107345 0.073446 0.016949 0.033898 0.011299 
>YBR023c
0.309871 0.358798 0.331330 0.212199 0.177835 0.238832 0.004292 0.217167 0.438627 0.700429 0.996567 0.001717 0.236052 0.498712 0.722747 1.000000 0.000858 0.312446 0.559657 0.813734 0.999142 0.562232 0.098712 0.339056 0.038660 0.052405 0.007732 0.000858 0.198283 0.445494 0.619742 1.000000 0.036052 0.321888 0.624034 0.740773 0.970815 0.049785 0.369099 0.723605 0.877253 0.994850 0.572532 0.300687 0.002575 0.296137 0.569099 0.783691 0.989700 0.394850 0.345923 0.259227 0.261168 0.213918 0.168385 0.001717 0.237768 0.490987 0.718455 1.000000 0.003433 0.254077 0.506438 0.763090 0.999142 0.000858 0.264378 0.502146 0.766524 0.998283 0.366524 0.303863 0.329614 0.220790 0.201031 0.199313 0.000858 0.303863 0.555365 0.799142 0.999142 0.001717 0.232618 0.504721 0.722747 1.000000 0.004292 0.222318 0.444635 0.703004 0.996567 0.328755 0.412017 0.259227 0.256014 0.174399 0.207904 0.001717 0.230901 0.480687 0.708155 1.000000 0.003433 0.257511 0.529614 0.769099 0.999142 0.000858 0.264378 0.502146 0.766524 0.998283 0.039485 0.071245 0.046352 0.072103 0.030043 0.050644 0.053219 0.050644 0.090129 0.062661 0.047210 0.019742 0.035193 0.018884 0.068670 0.087554 0.062661 0.025751 0.048069 0.019742 
>YBR024w
0.358804 0.352159 0.289037 0.240000 0.190000 0.220000 0.009967 0.235880 0.534884 0.794020 1.000000 0.013289 0.229236 0.445183 0.704319 0.986711 0.003322 0.255814 0.511628 0.734219 0.996678 0.468439 0.166113 0.365449 0.073333 0.060000 0.000000 0.003322 0.209302 0.408638 0.687708 1.000000 0.102990 0.448505 0.614618 0.803987 0.867110 0.016611 0.265781 0.544850 0.734219 0.993355 0.485050 0.326667 0.019934 0.289037 0.534884 0.760797 0.996678 0.375415 0.328904 0.295681 0.246667 0.220000 0.190000 0.013289 0.222591 0.451827 0.684385 0.986711 0.006645 0.252492 0.531561 0.794020 1.000000 0.003322 0.249169 0.495017 0.760797 0.996678 0.345515 0.282392 0.372093 0.203333 0.233333 0.210000 0.003322 0.279070 0.524917 0.754153 0.996678 0.013289 0.202658 0.405316 0.671096 0.986711 0.009967 0.242525 0.541528 0.794020 1.000000 0.299003 0.405316 0.295681 0.246667 0.186667 0.223333 0.013289 0.205980 0.428571 0.687708 0.986711 0.006645 0.232558 0.528239 0.770764 1.000000 0.003322 0.249169 0.495017 0.760797 0.996678 0.076412 0.069767 0.066445 0.069767 0.036545 0.039867 0.063123 0.049834 0.076412 0.039867 0.053156 0.013289 0.056478 0.023256 0.029900 0.096346 0.059801 0.003322 0.066445 0.009967 
>YBR025c
0.357868 0.322335 0.319797 0.216285 0.239186 0.211196 0.010152 0.309645 0.494924 0.733503 1.000000 0.005076 0.208122 0.444162 0.743655 0.994924 0.002538 0.279188 0.515228 0.746193 0.982234 0.393401 0.215736 0.390863 0.083969 0.078880 0.002545 0.002538 0.200508 0.505076 0.776650 1.000000 0.032995 0.208122 0.520305 0.852792 0.989848 0.083756 0.378173 0.492386 0.697970 0.928934 0.558376 0.386768 0.032995 0.241117 0.492386 0.761421 0.992386 0.355330 0.393401 0.251269 0.259542 0.178117 0.211196 0.005076 0.218274 0.449239 0.776650 0.994924 0.015228 0.274112 0.482234 0.715736 1.000000 0.002538 0.279188 0.555838 0.771574 0.997462 0.345178 0.279188 0.375635 0.175573 0.279898 0.195929 0.002538 0.279188 0.527919 0.753807 0.982234 0.005076 0.203046 0.441624 0.743655 0.994924 0.010152 0.309645 0.502538 0.733503 1.000000 0.294416 0.454315 0.251269 0.262087 0.145038 0.244275 0.038071 0.251269 0.484772 0.791878 0.994924 0.005076 0.223350 0.472081 0.708122 1.000000 0.002538 0.279188 0.555838 0.771574 0.997462 0.048223 0.096447 0.083756 0.060914 0.032995 0.035533 0.063452 0.076142 0.053299 0.040609 0.045685 0.017766 0.025381 0.015228 0.063452 0.088832 0.088832 0.020305 0.035533 0.007614 
>YBR026c
0.328947 0.378947 0.292105 0.242744 0.189974 0.226913 0.015789 0.286842 0.550000 0.757895 0.997368 0.007895 0.221053 0.455263 0.742105 0.976316 0.002632 0.263158 0.494737 0.752632 1.000000 0.436842 0.223684 0.339474 0.089710 0.068602 0.005277 0.002632 0.194737 0.365789 0.718421 1.000000 0.018421 0.150000 0.344737 0.676316 0.997368 0.092105 0.442105 0.634211 0.842105 0.965789 0.594737 0.353562 0.013158 0.265789 0.478947 0.718421 0.992105 0.392105 0.376316 0.231579 0.298153 0.197889 0.160950 0.007895 0.236842 0.447368 0.705263 0.976316 0.005263 0.263158 0.505263 0.734211 0.997368 0.002632 0.207895 0.552632 0.805263 1.000000 0.326316 0.331579 0.342105 0.226913 0.226913 0.216359 0.002632 0.255263 0.473684 0.752632 1.000000 0.007895 0.236842 0.481579 0.713158 0.976316 0.015789 0.250000 0.550000 0.760526 0.997368 0.350000 0.418421 0.231579 0.292876 0.182058 0.176781 0.010526 0.276316 0.484211 0.705263 0.976316 0.005263 0.239474 0.476316 0.734211 0.997368 0.002632 0.207895 0.552632 0.805263 1.000000 0.026316 0.097368 0.050000 0.055263 0.036842 0.063158 0.063158 0.050000 0.107895 0.073684 0.036842 0.013158 0.034211 0.005263 0.076316 0.084211 0.065789 0.015789 0.028947 0.015789 
>YBR027c
0.236364 0.263636 0.500000 0.110092 0.201835 0.275229 0.027273 0.263636 0.536364 0.736364 0.963636 0.036364 0.181818 0.409091 0.681818 0.981818 0.009091 0.209091 0.500000 0.763636 1.000000 0.263636 0.127273 0.609091 0.018349 0.091743 0.018349 0.009091 0.290909 0.354545 0.536364 1.000000 0.472727 0.490909 0.590909 0.618182 0.654545 0.045455 0.181818 0.463636 0.827273 0.990909 0.690909 0.311927 0.045455 0.227273 0.500000 0.727273 0.972727 0.272727 0.436364 0.290909 0.238532 0.146789 0.247706 0.036364 0.181818 0.390909 0.672727 0.954545 0.054545 0.254545 0.490909 0.790909 1.000000 0.009091 0.218182 0.572727 0.781818 0.981818 0.536364 0.190909 0.272727 0.174312 0.266055 0.100917 0.009091 0.209091 0.490909 0.754545 1.000000 0.036364 0.145455 0.372727 0.527273 0.845455 0.027273 0.281818 0.609091 0.809091 0.981818 0.181818 0.527273 0.290909 0.201835 0.055046 0.339450 0.036364 0.145455 0.363636 0.518182 0.845455 0.054545 0.254545 0.500000 0.772727 1.000000 0.009091 0.218182 0.572727 0.781818 0.981818 0.054545 0.045455 0.018182 0.018182 0.027273 0.072727 0.072727 0.009091 0.027273 0.054545 0.027273 0.036364 0.036364 0.063636 0.045455 0.136364 0.136364 0.018182 0.081818 0.018182 
>YBR028c
0.350476 0.371429 0.278095 0.242366 0.185115 0.215649 0.011429 0.251429 0.466667 0.748571 0.996190 0.007619 0.217143 0.499048 0.767619 0.998095 0.001905 0.255238 0.508571 0.733333 1.000000 0.609524 0.112381 0.278095 0.064885 0.091603 0.003817 0.001905 0.186667 0.428571 0.739048 1.000000 0.005714 0.095238 0.304762 0.438095 0.979048 0.013333 0.480000 0.664762 0.786667 0.996190 0.468571 0.351145 0.005714 0.300952 0.527619 0.687619 0.998095 0.369524 0.363810 0.266667 0.272901 0.204198 0.154580 0.007619 0.222857 0.502857 0.756190 0.988571 0.003810 0.249524 0.466667 0.708571 0.994286 0.001905 0.264762 0.512381 0.784762 1.000000 0.325714 0.297143 0.377143 0.202290 0.225191 0.209924 0.001905 0.270476 0.510476 0.735238 1.000000 0.007619 0.217143 0.514286 0.792381 0.988571 0.011429 0.240000 0.460952 0.727619 0.996190 0.318095 0.415238 0.266667 0.267176 0.183206 0.175573 0.007619 0.217143 0.485714 0.769524 0.988571 0.003810 0.249524 0.497143 0.708571 0.994286 0.001905 0.264762 0.512381 0.784762 1.000000 0.041905 0.087619 0.064762 0.062857 0.024762 0.068571 0.053333 0.049524 0.095238 0.057143 0.041905 0.026667 0.047619 0.009524 0.040000 0.100952 0.064762 0.017143 0.038095 0.007619 
>YBR029c
0.231947 0.347921 0.420131 0.149123 0.188596 0.291667 0.006565 0.207877 0.527352 0.818381 0.995624 0.004376 0.212254 0.509847 0.741794 1.000000 0.002188 0.308534 0.485777 0.722101 0.991247 0.271335 0.017505 0.711160 0.010965 0.063596 0.002193 0.002188 0.089716 0.603939 0.789934 1.000000 0.039387 0.612691 0.638950 0.643326 0.647702 0.030635 0.277899 0.455142 0.741794 0.989059 0.691466 0.245614 0.015317 0.330416 0.522976 0.739606 0.991247 0.347921 0.374179 0.277899 0.260965 0.192982 0.203947 0.004376 0.203501 0.514223 0.750547 1.000000 0.008753 0.273523 0.494530 0.730853 0.995624 0.002188 0.271335 0.472648 0.754923 0.997812 0.452954 0.288840 0.258206 0.258772 0.212719 0.151316 0.002188 0.304158 0.481400 0.717724 0.991247 0.004376 0.185996 0.520788 0.743982 1.000000 0.006565 0.207877 0.527352 0.807440 0.997812 0.286652 0.435449 0.277899 0.225877 0.171053 0.225877 0.004376 0.179431 0.516411 0.768053 1.000000 0.008753 0.273523 0.494530 0.711160 0.995624 0.002188 0.271335 0.472648 0.754923 0.997812 0.021882 0.072210 0.041575 0.032823 0.019694 0.043764 0.052516 0.052516 0.065646 0.083151 0.035011 0.026258 0.032823 0.026258 0.063457 0.118162 0.087527 0.015317 0.098468 0.010941 
>YBR030w
0.369565 0.320652 0.309783 0.228675 0.225045 0.215971 0.010870 0.300725 0.545290 0.753623 0.996377 0.003623 0.219203 0.461957 0.775362 1.000000 0.001812 0.213768 0.451087 0.695652 0.998188 0.514493 0.079710 0.405797 0.043557 0.090744 0.007260 0.001812 0.244565 0.483696 0.722826 1.000000 0.041667 0.077899 0.394928 0.581522 0.798913 0.012681 0.266304 0.619565 0.826087 0.996377 0.487319 0.359347 0.005435 0.230072 0.471014 0.701087 0.998188 0.371377 0.400362 0.228261 0.321234 0.163339 0.183303 0.003623 0.219203 0.472826 0.753623 1.000000 0.005435 0.288043 0.528986 0.757246 0.998188 0.001812 0.224638 0.454710 0.699275 0.996377 0.335145 0.268116 0.396739 0.203267 0.263158 0.208711 0.001812 0.222826 0.452899 0.688406 0.998188 0.003623 0.215580 0.487319 0.802536 1.000000 0.010870 0.297101 0.530797 0.751812 0.996377 0.320652 0.451087 0.228261 0.312160 0.139746 0.206897 0.003623 0.219203 0.480072 0.751812 1.000000 0.005435 0.284420 0.523551 0.760870 0.998188 0.001812 0.224638 0.454710 0.699275 0.996377 0.027174 0.070652 0.106884 0.086957 0.023551 0.054348 0.045290 0.057971 0.094203 0.036232 0.034420 0.027174 0.025362 0.016304 0.047101 0.110507 0.057971 0.016304 0.045290 0.016304 
>YBR031w
0.298343 0.439227 0.262431 0.246537 0.166205 0.213296 0.008287 0.298343 0.533149 0.803867 1.000000 0.005525 0.207182 0.455801 0.743094 0.997238 0.002762 0.273481 0.500000 0.720994 0.991713 0.502762 0.113260 0.383978 0.066482 0.121884 0.000000 0.002762 0.212707 0.436464 0.726519 1.000000 0.013812 0.171271 0.417127 0.571823 0.690608 0.066298 0.345304 0.599448 0.823204 0.991713 0.480663 0.415512 0.011050 0.245856 0.447514 0.682320 0.991713 0.417127 0.334254 0.248619 0.277008 0.207756 0.177285 0.005525 0.215470 0.455801 0.740331 1.000000 0.013812 0.314917 0.555249 0.751381 0.991713 0.002762 0.270718 0.511050 0.748619 0.997238 0.279006 0.395028 0.325967 0.218837 0.188366 0.246537 0.002762 0.276243 0.502762 0.720994 0.991713 0.005525 0.207182 0.447514 0.740331 0.988950 0.008287 0.295580 0.527624 0.795580 1.000000 0.367403 0.383978 0.248619 0.265928 0.185596 0.199446 0.005525 0.220994 0.461326 0.734807 1.000000 0.011050 0.281768 0.541436 0.762431 0.991713 0.002762 0.270718 0.511050 0.748619 0.997238 0.069061 0.088398 0.044199 0.019337 0.033149 0.044199 0.077348 0.124309 0.069061 0.077348 0.046961 0.027624 0.016575 0.002762 0.093923 0.077348 0.041436 0.008287 0.022099 0.016575 
>YBR032w
0.300000 0.340000 0.360000 0.202020 0.252525 0.202020 0.050000 0.210000 0.560000 0.780000 1.000000 0.070000 0.350000 0.520000 0.670000 0.970000 0.010000 0.180000 0.410000 0.720000 0.990000 0.500000 0.130000 0.370000 0.050505 0.070707 0.030303 0.010000 0.310000 0.480000 0.750000 1.000000 0.020000 0.040000 0.070000 0.440000 0.730000 0.080000 0.200000 0.580000 0.870000 0.970000 0.600000 0.363636 0.030000 0.230000 0.480000 0.720000 0.970000 0.320000 0.450000 0.230000 0.232323 0.151515 0.262626 0.070000 0.310000 0.480000 0.630000 0.970000 0.020000 0.200000 0.450000 0.780000 1.000000 0.010000 0.240000 0.510000 0.760000 0.980000 0.420000 0.260000 0.320000 0.161616 0.292929 0.181818 0.010000 0.190000 0.440000 0.740000 0.990000 0.070000 0.340000 0.490000 0.630000 0.970000 0.050000 0.240000 0.560000 0.790000 1.000000 0.250000 0.520000 0.230000 0.191919 0.111111 0.303030 0.070000 0.280000 0.480000 0.620000 0.970000 0.020000 0.210000 0.460000 0.790000 1.000000 0.010000 0.240000 0.510000 0.760000 0.980000 0.040000 0.030000 0.050000 0.040000 0.070000 0.070000 0.050000 0.050000 0.070000 0.040000 0.050000 0.020000 0.060000 0.020000 0.050000 0.160000 0.050000 0.020000 0.050000 0.010000 
>YBR033w
0.340588 0.347116 0.312296 0.206972 0.208061 0.213508 0.007617 0.224157 0.465724 0.730141 1.000000 0.002176 0.221980 0.429815 0.763874 0.992383 0.001088 0.321001 0.551687 0.766050 0.998912 0.545158 0.084875 0.369967 0.042484 0.077342 0.009804 0.001088 0.195865 0.362350 0.689880 1.000000 0.068553 0.226333 0.412405 0.632209 0.995647 0.019587 0.452666 0.637650 0.783460 0.984766 0.470076 0.366013 0.005441 0.340588 0.561480 0.772579 0.998912 0.369967 0.386289 0.243743 0.271242 0.173203 0.178649 0.002176 0.227421 0.467900 0.780196 0.996736 0.005441 0.295974 0.548422 0.744287 1.000000 0.001088 0.210011 0.462459 0.713819 0.998912 0.342764 0.300326 0.356910 0.200436 0.229847 0.196078 0.001088 0.317737 0.542982 0.766050 0.998912 0.002176 0.229597 0.429815 0.775843 0.992383 0.003264 0.220892 0.465724 0.729053 1.000000 0.297062 0.459195 0.243743 0.255991 0.131808 0.220044 0.002176 0.232862 0.473341 0.780196 0.992383 0.005441 0.268770 0.536453 0.748640 1.000000 0.001088 0.210011 0.462459 0.713819 0.998912 0.050054 0.072905 0.060936 0.042437 0.039173 0.075082 0.051143 0.044614 0.107726 0.051143 0.045702 0.016322 0.030468 0.027203 0.048966 0.091404 0.070729 0.022851 0.046790 0.004353 
>YBR034c
0.333333 0.344828 0.321839 0.224784 0.213256 0.227666 0.008621 0.252874 0.528736 0.772989 0.982759 0.005747 0.227011 0.491379 0.787356 1.000000 0.002874 0.267241 0.459770 0.692529 0.997126 0.379310 0.367816 0.252874 0.115274 0.074928 0.005764 0.002874 0.255747 0.525862 0.798851 1.000000 0.008621 0.448276 0.649425 0.833333 0.997126 0.043103 0.126437 0.270115 0.511494 0.675287 0.580460 0.386167 0.017241 0.250000 0.477011 0.704023 0.997126 0.356322 0.362069 0.281609 0.253602 0.219020 0.184438 0.005747 0.232759 0.505747 0.775862 0.988506 0.017241 0.267241 0.497126 0.712644 0.994253 0.002874 0.227011 0.474138 0.741379 1.000000 0.367816 0.264368 0.367816 0.204611 0.270893 0.193084 0.002874 0.267241 0.459770 0.692529 0.997126 0.005747 0.229885 0.505747 0.787356 0.988506 0.008621 0.235632 0.520115 0.772989 1.000000 0.310345 0.408046 0.281609 0.265130 0.184438 0.219020 0.005747 0.218391 0.491379 0.758621 0.988506 0.017241 0.284483 0.520115 0.732759 0.994253 0.002874 0.227011 0.474138 0.741379 1.000000 0.028736 0.080460 0.068966 0.083333 0.020115 0.051724 0.060345 0.040230 0.071839 0.054598 0.037356 0.034483 0.045977 0.008621 0.063218 0.086207 0.071839 0.028736 0.051724 0.011494 
>YBR035c
0.403509 0.328947 0.267544 0.290749 0.202643 0.189427 0.013158 0.214912 0.535088 0.745614 0.986842 0.008772 0.250000 0.429825 0.662281 1.000000 0.004386 0.263158 0.486842 0.789474 0.991228 0.438596 0.271930 0.289474 0.074890 0.074890 0.004405 0.004386 0.149123 0.403509 0.771930 1.000000 0.250000 0.372807 0.526316 0.859649 0.986842 0.061404 0.179825 0.500000 0.649123 0.899123 0.504386 0.387665 0.052632 0.315789 0.491228 0.745614 0.991228 0.355263 0.346491 0.298246 0.268722 0.202643 0.207048 0.008772 0.241228 0.442982 0.719298 1.000000 0.017544 0.228070 0.508772 0.728070 0.991228 0.004386 0.302632 0.526316 0.767544 0.986842 0.293860 0.285088 0.421053 0.171806 0.237885 0.246696 0.004386 0.254386 0.486842 0.798246 0.991228 0.008772 0.250000 0.425439 0.657895 1.000000 0.013158 0.223684 0.535088 0.745614 0.986842 0.289474 0.412281 0.298246 0.255507 0.176211 0.233480 0.008772 0.250000 0.434211 0.662281 0.995614 0.017544 0.228070 0.517544 0.754386 1.000000 0.004386 0.302632 0.526316 0.767544 0.986842 0.092105 0.070175 0.096491 0.065789 0.039474 0.039474 0.039474 0.057018 0.052632 0.074561 0.061404 0.017544 0.026316 0.004386 0.043860 0.065789 0.061404 0.004386 0.057018 0.030702 
>YBR036c
0.229268 0.360976 0.409756 0.173594 0.129584 0.317848 0.041463 0.226829 0.419512 0.670732 0.992683 0.004878 0.214634 0.500000 0.760976 1.000000 0.002439 0.324390 0.539024 0.770732 0.982927 0.331707 0.080488 0.587805 0.034230 0.058680 0.014670 0.002439 0.214634 0.297561 0.736585 1.000000 0.009756 0.092683 0.682927 0.775610 0.980488 0.012195 0.341463 0.507317 0.731707 0.973171 0.670732 0.239609 0.009756 0.326829 0.517073 0.773171 0.982927 0.373171 0.404878 0.221951 0.344743 0.139364 0.168704 0.004878 0.214634 0.458537 0.721951 0.990244 0.012195 0.278049 0.509756 0.763415 0.987805 0.002439 0.219512 0.485366 0.746341 1.000000 0.439024 0.321951 0.239024 0.300733 0.151589 0.163814 0.002439 0.324390 0.521951 0.775610 0.995122 0.004878 0.209756 0.500000 0.751220 0.990244 0.041463 0.231707 0.421951 0.675610 1.000000 0.314634 0.463415 0.221951 0.349633 0.114914 0.193154 0.004878 0.212195 0.441463 0.707317 0.990244 0.012195 0.285366 0.514634 0.758537 0.987805 0.002439 0.219512 0.485366 0.746341 1.000000 0.026829 0.043902 0.036585 0.034146 0.026829 0.060976 0.058537 0.058537 0.100000 0.063415 0.041463 0.009756 0.029268 0.017073 0.073171 0.119512 0.087805 0.036585 0.056098 0.019512 
>YBR037c
0.318644 0.376271 0.305085 0.231293 0.173469 0.265306 0.010169 0.237288 0.498305 0.779661 1.000000 0.016949 0.244068 0.481356 0.728814 0.986441 0.003390 0.240678 0.511864 0.718644 0.996610 0.461017 0.166102 0.372881 0.068027 0.088435 0.000000 0.003390 0.186441 0.400000 0.677966 1.000000 0.030508 0.437288 0.603390 0.800000 0.864407 0.057627 0.271186 0.545763 0.888136 0.993220 0.505085 0.299320 0.020339 0.261017 0.511864 0.749153 0.996610 0.383051 0.335593 0.281356 0.292517 0.197279 0.224490 0.016949 0.244068 0.505085 0.701695 0.986441 0.006780 0.223729 0.474576 0.725424 0.993220 0.003390 0.271186 0.484746 0.796610 1.000000 0.349153 0.318644 0.332203 0.234694 0.210884 0.207483 0.003390 0.271186 0.528814 0.752542 0.996610 0.016949 0.193220 0.427119 0.681356 0.986441 0.010169 0.254237 0.508475 0.789831 1.000000 0.311864 0.406780 0.281356 0.312925 0.176871 0.244898 0.016949 0.230508 0.471186 0.701695 0.986441 0.006780 0.237288 0.511864 0.732203 0.993220 0.003390 0.271186 0.484746 0.796610 1.000000 0.050847 0.084746 0.057627 0.050847 0.030508 0.044068 0.088136 0.057627 0.067797 0.047458 0.057627 0.013559 0.044068 0.013559 0.054237 0.111864 0.037288 0.010169 0.067797 0.010169 
>YBR038w
0.305296 0.370717 0.323988 0.242204 0.173597 0.224532 0.003115 0.217030 0.430945 0.670820 0.998962 0.002077 0.185877 0.454829 0.731049 1.000000 0.001038 0.373832 0.613707 0.787124 0.995846 0.508827 0.091381 0.399792 0.034304 0.055094 0.001040 0.001038 0.126687 0.287643 0.562825 1.000000 0.231568 0.305296 0.401869 0.530633 0.995846 0.215992 0.526480 0.694704 0.817238 0.986501 0.603323 0.253638 0.004154 0.335410 0.560748 0.755971 0.995846 0.366563 0.350987 0.282451 0.277547 0.180873 0.194387 0.002077 0.190031 0.445483 0.732087 1.000000 0.004154 0.295950 0.517134 0.763240 0.994808 0.001038 0.284528 0.544133 0.755971 0.998962 0.368640 0.304258 0.327103 0.202703 0.220374 0.207900 0.001038 0.353063 0.591900 0.780893 0.995846 0.002077 0.174455 0.446521 0.732087 1.000000 0.003115 0.217030 0.431983 0.681205 0.998962 0.309450 0.408100 0.282451 0.265073 0.162162 0.213098 0.002077 0.193146 0.467290 0.744548 1.000000 0.004154 0.261682 0.498442 0.746625 0.994808 0.001038 0.284528 0.544133 0.755971 0.998962 0.050883 0.063344 0.051921 0.049844 0.037383 0.051921 0.046729 0.068536 0.092420 0.051921 0.044652 0.021807 0.044652 0.012461 0.062305 0.092420 0.055036 0.024922 0.059190 0.017653 
>YBR039w
0.344051 0.372990 0.282958 0.277419 0.200000 0.209677 0.012862 0.241158 0.466238 0.742765 0.971061 0.009646 0.282958 0.546624 0.768489 1.000000 0.003215 0.205788 0.485531 0.729904 0.996785 0.311897 0.138264 0.549839 0.054839 0.035484 0.003226 0.003215 0.093248 0.372990 0.610932 1.000000 0.016077 0.350482 0.520900 0.659164 0.745981 0.012862 0.244373 0.569132 0.858521 0.996785 0.527331 0.419355 0.016077 0.337621 0.549839 0.797428 0.987138 0.385852 0.376206 0.237942 0.316129 0.196774 0.180645 0.009646 0.311897 0.546624 0.758842 1.000000 0.006431 0.254019 0.482315 0.742765 0.996785 0.003215 0.183280 0.469453 0.704180 0.938907 0.311897 0.331190 0.356913 0.212903 0.229032 0.261290 0.003215 0.205788 0.488746 0.739550 0.996785 0.009646 0.282958 0.546624 0.758842 1.000000 0.012862 0.241158 0.446945 0.736334 0.971061 0.344051 0.418006 0.237942 0.309677 0.170968 0.206452 0.009646 0.289389 0.543408 0.790997 1.000000 0.006431 0.260450 0.488746 0.717042 0.996785 0.003215 0.183280 0.469453 0.704180 0.938907 0.045016 0.090032 0.057878 0.048232 0.035370 0.067524 0.041801 0.102894 0.080386 0.070740 0.035370 0.012862 0.028939 0.006431 0.048232 0.077170 0.090032 0.035370 0.025723 0.000000 
>YBR040w
0.228188 0.348993 0.422819 0.144781 0.151515 0.292929 0.040268 0.234899 0.439597 0.805369 0.996644 0.010067 0.278523 0.473154 0.738255 0.993289 0.003356 0.204698 0.533557 0.711409 1.000000 0.348993 0.114094 0.536913 0.043771 0.063973 0.003367 0.003356 0.241611 0.395973 0.771812 1.000000 0.151007 0.174497 0.261745 0.731544 0.788591 0.010067 0.379195 0.560403 0.714765 0.942953 0.587248 0.316498 0.010067 0.251678 0.513423 0.728188 0.986577 0.335570 0.406040 0.258389 0.252525 0.191919 0.181818 0.010067 0.278523 0.473154 0.761745 0.993289 0.006711 0.258389 0.496644 0.687919 1.000000 0.003356 0.174497 0.500000 0.771812 0.996644 0.469799 0.291946 0.238255 0.286195 0.198653 0.117845 0.003356 0.208054 0.523490 0.711409 1.000000 0.010067 0.275168 0.473154 0.738255 0.993289 0.040268 0.234899 0.463087 0.805369 0.996644 0.288591 0.453020 0.258389 0.235690 0.161616 0.212121 0.010067 0.278523 0.476510 0.765101 0.993289 0.006711 0.255034 0.493289 0.687919 1.000000 0.003356 0.174497 0.500000 0.771812 0.996644 0.030201 0.060403 0.020134 0.030201 0.020134 0.067114 0.026846 0.050336 0.124161 0.057047 0.033557 0.010067 0.046980 0.013423 0.077181 0.127517 0.093960 0.033557 0.060403 0.016779 
>YBR041w
0.306428 0.345291 0.348281 0.220060 0.217066 0.241018 0.007474 0.275037 0.569507 0.793722 0.998505 0.002990 0.273543 0.487294 0.717489 0.995516 0.001495 0.212257 0.457399 0.714499 1.000000 0.458894 0.186846 0.354260 0.079341 0.070359 0.010479 0.001495 0.333333 0.591928 0.747384 1.000000 0.055306 0.316891 0.545590 0.772795 0.929746 0.004484 0.170404 0.351271 0.726457 0.997010 0.642750 0.287425 0.005979 0.239163 0.475336 0.714499 0.995516 0.339312 0.369208 0.291480 0.251497 0.173653 0.226048 0.002990 0.300448 0.506726 0.748879 0.995516 0.005979 0.218236 0.437967 0.741405 1.000000 0.001495 0.197309 0.524664 0.745889 0.998505 0.399103 0.272048 0.328849 0.209581 0.278443 0.179641 0.001495 0.194320 0.458894 0.720478 1.000000 0.002990 0.310912 0.491779 0.721973 0.995516 0.007474 0.270553 0.545590 0.786248 0.998505 0.285501 0.423019 0.291480 0.250000 0.142216 0.257485 0.002990 0.315396 0.517190 0.765321 0.995516 0.004484 0.225710 0.445441 0.723468 1.000000 0.001495 0.197309 0.524664 0.745889 0.998505 0.044843 0.070254 0.052317 0.053812 0.040359 0.044843 0.056801 0.056801 0.056801 0.061286 0.040359 0.022422 0.050822 0.013453 0.062780 0.103139 0.065770 0.020927 0.062780 0.019432 
>YBR042c
0.287154 0.342569 0.370277 0.207071 0.181818 0.237374 0.010076 0.259446 0.528967 0.760705 0.984887 0.007557 0.289673 0.508816 0.712846 0.989924 0.002519 0.176322 0.403023 0.758186 1.000000 0.304786 0.120907 0.574307 0.042929 0.093434 0.002525 0.002519 0.322418 0.546599 0.722922 1.000000 0.035264 0.224181 0.554156 0.750630 0.793451 0.005038 0.161209 0.460957 0.816121 0.997481 0.672544 0.272727 0.007557 0.196474 0.403023 0.707809 0.997481 0.322418 0.400504 0.277078 0.277778 0.166667 0.247475 0.017632 0.292191 0.496222 0.712846 0.992443 0.005038 0.204030 0.498741 0.753149 0.997481 0.002519 0.239295 0.491184 0.755668 1.000000 0.415617 0.274559 0.309824 0.227273 0.232323 0.176768 0.002519 0.211587 0.440806 0.768262 1.000000 0.017632 0.292191 0.483627 0.687657 0.967254 0.007557 0.244332 0.521411 0.760705 0.984887 0.272040 0.450882 0.277078 0.260101 0.128788 0.285354 0.017632 0.294710 0.478589 0.712846 0.967254 0.005038 0.211587 0.506297 0.753149 0.997481 0.002519 0.239295 0.491184 0.755668 1.000000 0.037783 0.088161 0.052897 0.037783 0.025189 0.045340 0.052897 0.045340 0.085642 0.050378 0.040302 0.022670 0.045340 0.010076 0.052897 0.123426 0.100756 0.010076 0.050378 0.022670 
>YBR043c
0.272859 0.391872 0.335269 0.200581 0.155523 0.281977 0.002903 0.211901 0.476052 0.640058 1.000000 0.004354 0.248186 0.519594 0.753266 0.994194 0.001451 0.261248 0.512337 0.796807 0.998549 0.328012 0.020319 0.651669 0.014535 0.061047 0.002907 0.001451 0.082729 0.326560 0.531205 1.000000 0.059507 0.464441 0.486212 0.502177 0.846154 0.149492 0.329463 0.597968 0.812772 0.995646 0.663280 0.197674 0.018868 0.310595 0.561684 0.806967 0.998549 0.381713 0.374456 0.243832 0.293605 0.175872 0.174419 0.004354 0.248186 0.490566 0.753266 1.000000 0.002903 0.246734 0.478955 0.721335 0.998549 0.001451 0.236575 0.554427 0.769231 0.997097 0.383164 0.329463 0.287373 0.261628 0.199128 0.162791 0.001451 0.267054 0.547170 0.786647 0.998549 0.004354 0.242380 0.490566 0.753266 0.975327 0.002903 0.191582 0.476052 0.640058 1.000000 0.328012 0.428157 0.243832 0.281977 0.143895 0.206395 0.004354 0.258345 0.506531 0.759071 1.000000 0.002903 0.240929 0.471698 0.731495 0.998549 0.001451 0.236575 0.554427 0.769231 0.997097 0.050798 0.044993 0.050798 0.043541 0.034833 0.047896 0.060958 0.068215 0.095791 0.059507 0.044993 0.014514 0.047896 0.008708 0.063861 0.108853 0.068215 0.027576 0.040639 0.017417 
>YBR044c
0.338569 0.345550 0.315881 0.243007 0.213287 0.222028 0.005236 0.244328 0.467714 0.706806 1.000000 0.017452 0.247818 0.528796 0.778360 0.998255 0.001745 0.242583 0.492147 0.759162 0.989529 0.361257 0.137871 0.500873 0.057692 0.075175 0.005245 0.001745 0.214660 0.445026 0.771379 1.000000 0.029668 0.364747 0.500873 0.626527 0.879581 0.003490 0.232112 0.530541 0.766143 0.979058 0.520070 0.409091 0.008726 0.286213 0.523560 0.781850 0.984293 0.361257 0.403141 0.235602 0.293706 0.178322 0.167832 0.008726 0.265271 0.518325 0.767888 0.998255 0.003490 0.253054 0.502618 0.752182 0.991274 0.001745 0.200698 0.448517 0.699825 1.000000 0.361257 0.287958 0.350785 0.230769 0.256993 0.202797 0.001745 0.246073 0.492147 0.759162 0.989529 0.017452 0.265271 0.551483 0.785340 0.998255 0.005236 0.212914 0.458988 0.706806 1.000000 0.298429 0.465969 0.235602 0.277972 0.152098 0.194056 0.017452 0.265271 0.497382 0.743455 0.994764 0.003490 0.253054 0.527051 0.759162 0.998255 0.001745 0.200698 0.448517 0.699825 1.000000 0.045375 0.085515 0.052356 0.052356 0.020942 0.082024 0.048866 0.052356 0.083770 0.061082 0.041885 0.012216 0.045375 0.020942 0.061082 0.113438 0.073298 0.019197 0.024433 0.003490 
>YBR045c
0.418848 0.352531 0.228621 0.297203 0.211538 0.153846 0.003490 0.258290 0.507853 0.774869 1.000000 0.005236 0.249564 0.493892 0.706806 0.993019 0.001745 0.216405 0.490401 0.745201 0.998255 0.675393 0.099476 0.225131 0.050699 0.061189 0.005245 0.001745 0.249564 0.493892 0.694590 1.000000 0.006981 0.272251 0.504363 0.776614 0.879581 0.022688 0.186736 0.488656 0.914485 0.996510 0.335079 0.398601 0.006981 0.249564 0.490401 0.745201 0.993019 0.410122 0.329843 0.260035 0.279720 0.187063 0.174825 0.005236 0.251309 0.511344 0.701571 1.000000 0.003490 0.296684 0.521815 0.759162 0.998255 0.001745 0.186736 0.427574 0.774869 0.987784 0.258290 0.300175 0.441536 0.143357 0.250000 0.276224 0.001745 0.237347 0.504363 0.760908 0.998255 0.005236 0.249564 0.493892 0.694590 0.993019 0.003490 0.247818 0.486911 0.771379 1.000000 0.356021 0.383944 0.260035 0.269231 0.159091 0.202797 0.005236 0.289703 0.532286 0.715532 1.000000 0.003490 0.265271 0.490401 0.748691 0.998255 0.001745 0.186736 0.427574 0.774869 0.987784 0.057592 0.085515 0.090750 0.094241 0.027923 0.062827 0.026178 0.031414 0.130890 0.073298 0.038394 0.022688 0.029668 0.015707 0.033159 0.069808 0.045375 0.012216 0.048866 0.003490 
>YBR046c
0.308383 0.389222 0.302395 0.225225 0.192192 0.243243 0.005988 0.209581 0.514970 0.778443 1.000000 0.011976 0.263473 0.476048 0.745509 0.997006 0.002994 0.245509 0.491018 0.730539 0.994012 0.416168 0.263473 0.320359 0.111111 0.057057 0.003003 0.002994 0.203593 0.437126 0.748503 1.000000 0.029940 0.194611 0.332335 0.712575 0.991018 0.017964 0.401198 0.565868 0.841317 0.961078 0.661677 0.336336 0.014970 0.266467 0.470060 0.697605 0.994012 0.368263 0.380240 0.251497 0.270270 0.198198 0.171171 0.008982 0.266467 0.485030 0.739521 0.997006 0.014970 0.209581 0.482036 0.730539 1.000000 0.002994 0.239521 0.523952 0.790419 0.979042 0.368263 0.317365 0.314371 0.255255 0.240240 0.189189 0.002994 0.200599 0.482036 0.754491 0.994012 0.011976 0.284431 0.485030 0.739521 0.997006 0.005988 0.233533 0.514970 0.742515 1.000000 0.320359 0.428144 0.251497 0.246246 0.168168 0.201201 0.011976 0.290419 0.517964 0.706587 0.976048 0.008982 0.191617 0.461078 0.757485 1.000000 0.002994 0.239521 0.523952 0.790419 0.979042 0.026946 0.101796 0.068862 0.044910 0.029940 0.035928 0.080838 0.074850 0.068862 0.050898 0.041916 0.005988 0.065868 0.005988 0.074850 0.095808 0.074850 0.008982 0.038922 0.002994 
>YBR047w
0.377143 0.280000 0.342857 0.224138 0.298851 0.132184 0.022857 0.314286 0.520000 0.748571 1.000000 0.028571 0.205714 0.360000 0.662857 0.942857 0.005714 0.217143 0.554286 0.805714 0.982857 0.422857 0.068571 0.508571 0.022989 0.103448 0.011494 0.005714 0.205714 0.325714 0.657143 1.000000 0.165714 0.177143 0.605714 0.760000 0.777143 0.017143 0.388571 0.554286 0.834286 0.988571 0.485714 0.436782 0.028571 0.325714 0.571429 0.828571 0.982857 0.274286 0.417143 0.308571 0.172414 0.160920 0.270115 0.040000 0.234286 0.531429 0.731429 0.971429 0.011429 0.274286 0.457143 0.737143 1.000000 0.005714 0.217143 0.468571 0.754286 0.994286 0.377143 0.205714 0.417143 0.114943 0.362069 0.183908 0.005714 0.257143 0.514286 0.788571 0.982857 0.040000 0.200000 0.348571 0.674286 0.942857 0.022857 0.297143 0.485714 0.725714 1.000000 0.222857 0.468571 0.308571 0.183908 0.149425 0.281609 0.040000 0.228571 0.531429 0.748571 0.971429 0.011429 0.257143 0.457143 0.702857 1.000000 0.005714 0.217143 0.468571 0.754286 0.994286 0.051429 0.097143 0.085714 0.062857 0.028571 0.051429 0.028571 0.028571 0.068571 0.034286 0.045714 0.040000 0.034286 0.005714 0.085714 0.097143 0.068571 0.017143 0.068571 0.000000 
>YBR048w
0.326923 0.384615 0.288462 0.251613 0.200000 0.264516 0.025641 0.185897 0.442308 0.743590 0.993590 0.012821 0.262821 0.474359 0.717949 0.987179 0.006410 0.314103 0.512821 0.762821 1.000000 0.506410 0.371795 0.121795 0.096774 0.058065 0.006452 0.006410 0.205128 0.391026 0.750000 1.000000 0.121795 0.442308 0.570513 0.692308 0.916667 0.019231 0.038462 0.070513 0.301282 0.974359 0.410256 0.516129 0.032051 0.307692 0.493590 0.750000 0.980769 0.339744 0.314103 0.346154 0.232258 0.219355 0.206452 0.012821 0.262821 0.435897 0.769231 0.987179 0.025641 0.237179 0.538462 0.756410 0.974359 0.006410 0.217949 0.519231 0.666667 1.000000 0.326923 0.314103 0.358974 0.219355 0.270968 0.206452 0.006410 0.314103 0.538462 0.750000 1.000000 0.012821 0.250000 0.435897 0.730769 0.987179 0.025641 0.192308 0.519231 0.705128 0.993590 0.275641 0.378205 0.346154 0.206452 0.167742 0.258065 0.012821 0.250000 0.435897 0.775641 0.987179 0.025641 0.237179 0.538462 0.756410 0.974359 0.006410 0.217949 0.519231 0.666667 1.000000 0.076923 0.128205 0.025641 0.012821 0.038462 0.044872 0.057692 0.064103 0.057692 0.083333 0.051282 0.032051 0.038462 0.012821 0.108974 0.032051 0.064103 0.012821 0.051282 0.006410 
>YBR049c
0.477778 0.314815 0.207407 0.255871 0.177998 0.142151 0.007407 0.225926 0.453086 0.717284 1.000000 0.002469 0.248148 0.481481 0.733333 0.997531 0.001235 0.322222 0.581481 0.845679 0.995062 0.640741 0.028395 0.330864 0.014833 0.084054 0.002472 0.001235 0.232099 0.427160 0.723457 1.000000 0.062963 0.175309 0.311111 0.417284 0.993827 0.014815 0.391358 0.620988 0.859259 0.987654 0.343210 0.331273 0.018519 0.275309 0.555556 0.801235 0.995062 0.382716 0.393827 0.223457 0.271941 0.153276 0.166873 0.002469 0.235802 0.472840 0.734568 0.997531 0.007407 0.225926 0.475309 0.735802 1.000000 0.001235 0.325926 0.562963 0.828395 0.996296 0.227160 0.259259 0.513580 0.124845 0.210136 0.211372 0.001235 0.329630 0.570370 0.845679 0.995062 0.002469 0.280247 0.487654 0.760494 0.997531 0.006173 0.223457 0.437037 0.712346 1.000000 0.355556 0.420988 0.223457 0.274413 0.133498 0.186650 0.003704 0.229630 0.466667 0.734568 0.997531 0.002469 0.233333 0.495062 0.735802 1.000000 0.001235 0.325926 0.562963 0.828395 0.996296 0.044444 0.077778 0.067901 0.116049 0.065432 0.106173 0.032099 0.072840 0.097531 0.037037 0.019753 0.035802 0.019753 0.007407 0.040741 0.070370 0.043210 0.020988 0.011111 0.013580 
>YBR050c
0.399408 0.325444 0.275148 0.249258 0.225519 0.142433 0.014793 0.233728 0.426036 0.647929 0.991124 0.005917 0.310651 0.650888 0.813609 0.988166 0.002959 0.221893 0.437870 0.695266 1.000000 0.573964 0.103550 0.322485 0.050445 0.050445 0.014837 0.002959 0.340237 0.600592 0.828402 1.000000 0.298817 0.505917 0.671598 0.822485 0.973373 0.026627 0.159763 0.263314 0.449704 0.967456 0.390533 0.385757 0.008876 0.257396 0.526627 0.713018 0.985207 0.375740 0.360947 0.263314 0.246291 0.151335 0.201780 0.005917 0.304734 0.636095 0.828402 0.988166 0.008876 0.260355 0.428994 0.721893 1.000000 0.002959 0.224852 0.402367 0.571006 0.970414 0.298817 0.275148 0.426036 0.127596 0.258160 0.222552 0.002959 0.221893 0.446746 0.695266 1.000000 0.005917 0.307692 0.642012 0.813609 0.988166 0.014793 0.248521 0.440828 0.665680 0.991124 0.313609 0.423077 0.263314 0.231454 0.124629 0.228487 0.005917 0.352071 0.683432 0.834320 0.982249 0.008876 0.233728 0.428994 0.718935 1.000000 0.002959 0.224852 0.402367 0.571006 0.970414 0.059172 0.082840 0.053254 0.079882 0.029586 0.094675 0.020710 0.053254 0.103550 0.056213 0.041420 0.026627 0.023669 0.020710 0.047337 0.076923 0.059172 0.017751 0.041420 0.011834 
>YBR052c
0.280952 0.419048 0.300000 0.272727 0.167464 0.263158 0.014286 0.209524 0.419048 0.766667 0.995238 0.009524 0.266667 0.519048 0.733333 0.971429 0.004762 0.195238 0.514286 0.719048 1.000000 0.523810 0.147619 0.328571 0.057416 0.086124 0.000000 0.004762 0.276190 0.504762 0.752381 1.000000 0.014286 0.042857 0.385714 0.576190 0.852381 0.066667 0.257143 0.628571 0.904762 0.990476 0.623810 0.325359 0.019048 0.333333 0.557143 0.719048 0.985714 0.419048 0.333333 0.247619 0.301435 0.224880 0.162679 0.009524 0.266667 0.528571 0.780952 0.995238 0.019048 0.166667 0.433333 0.728571 1.000000 0.004762 0.309524 0.471429 0.714286 0.990476 0.352381 0.347619 0.300000 0.253589 0.224880 0.234450 0.004762 0.223810 0.509524 0.719048 1.000000 0.009524 0.261905 0.504762 0.723810 0.961905 0.014286 0.219048 0.452381 0.766667 0.995238 0.371429 0.380952 0.247619 0.306220 0.200957 0.186603 0.023810 0.261905 0.519048 0.752381 0.995238 0.009524 0.180952 0.452381 0.766667 1.000000 0.004762 0.309524 0.471429 0.714286 0.990476 0.019048 0.080952 0.076190 0.057143 0.014286 0.033333 0.109524 0.090476 0.061905 0.052381 0.033333 0.019048 0.052381 0.014286 0.066667 0.071429 0.071429 0.019048 0.038095 0.019048 
>YBR053c
0.315642 0.343575 0.340782 0.254902 0.210084 0.218487 0.016760 0.276536 0.525140 0.737430 0.991620 0.005587 0.203911 0.441341 0.734637 1.000000 0.002793 0.265363 0.513966 0.754190 0.997207 0.639665 0.324022 0.036313 0.168067 0.016807 0.005602 0.002793 0.245810 0.491620 0.745810 1.000000 0.030726 0.284916 0.508380 0.734637 0.946927 0.019553 0.025140 0.189944 0.198324 0.910615 0.620112 0.302521 0.011173 0.259777 0.502793 0.748603 0.991620 0.385475 0.377095 0.237430 0.308123 0.173669 0.196078 0.005587 0.256983 0.497207 0.745810 0.994413 0.011173 0.243017 0.502793 0.756983 0.997207 0.002793 0.206704 0.463687 0.729050 1.000000 0.371508 0.287709 0.340782 0.190476 0.249300 0.240896 0.002793 0.262570 0.497207 0.748603 0.997207 0.005587 0.226257 0.466480 0.745810 0.994413 0.016760 0.240223 0.522346 0.737430 1.000000 0.304469 0.458101 0.237430 0.266106 0.148459 0.221289 0.005587 0.251397 0.480447 0.734637 0.983240 0.011173 0.254190 0.508380 0.779330 0.997207 0.002793 0.206704 0.463687 0.729050 1.000000 0.022346 0.072626 0.072626 0.072626 0.022346 0.053073 0.069832 0.030726 0.086592 0.044693 0.055866 0.025140 0.030726 0.025140 0.064246 0.092179 0.072626 0.011173 0.055866 0.019553 
>YBR054w
0.252907 0.372093 0.375000 0.183673 0.134111 0.276968 0.008721 0.273256 0.677326 0.906977 1.000000 0.005814 0.252907 0.479651 0.703488 0.997093 0.002907 0.218023 0.453488 0.645349 0.985465 0.313953 0.040698 0.645349 0.020408 0.072886 0.002915 0.002907 0.162791 0.572674 0.822674 1.000000 0.075581 0.255814 0.296512 0.305233 0.331395 0.011628 0.340116 0.511628 0.706395 0.982558 0.654070 0.239067 0.011628 0.232558 0.433140 0.639535 0.938953 0.369186 0.337209 0.293605 0.239067 0.209913 0.172012 0.005814 0.244186 0.511628 0.750000 0.997093 0.014535 0.250000 0.508721 0.723837 1.000000 0.002907 0.232558 0.473837 0.790698 0.962209 0.415698 0.313953 0.270349 0.271137 0.169096 0.154519 0.002907 0.218023 0.450581 0.636628 0.985465 0.005814 0.252907 0.500000 0.735465 0.997093 0.008721 0.279070 0.668605 0.904070 1.000000 0.302326 0.404070 0.293605 0.218659 0.177843 0.204082 0.005814 0.252907 0.517442 0.767442 0.997093 0.014535 0.247093 0.470930 0.723837 1.000000 0.002907 0.232558 0.473837 0.790698 0.962209 0.026163 0.090116 0.043605 0.040698 0.020349 0.031977 0.063953 0.078488 0.061047 0.058140 0.052326 0.017442 0.040698 0.014535 0.069767 0.087209 0.084302 0.031977 0.063953 0.023256 
>YBR055c
0.395996 0.292547 0.311457 0.232739 0.265033 0.168151 0.002225 0.195773 0.458287 0.721913 1.000000 0.004449 0.240267 0.476085 0.750834 0.987764 0.001112 0.335929 0.565072 0.779755 0.996663 0.305895 0.011123 0.682981 0.003341 0.112472 0.003341 0.001112 0.127920 0.317019 0.658509 1.000000 0.190211 0.191324 0.211346 0.342603 0.345940 0.006674 0.333704 0.556174 0.773081 0.997775 0.484983 0.429844 0.006674 0.281424 0.525028 0.754171 0.996663 0.325918 0.410456 0.263626 0.279510 0.154788 0.206013 0.004449 0.219132 0.450501 0.734149 0.998888 0.002225 0.255840 0.507230 0.740823 0.997775 0.001112 0.281424 0.560623 0.763070 1.000000 0.343715 0.248053 0.408231 0.165924 0.293987 0.208241 0.001112 0.342603 0.571746 0.779755 0.996663 0.004449 0.219132 0.440489 0.725250 0.987764 0.002225 0.196885 0.459399 0.723026 1.000000 0.273637 0.462736 0.263626 0.263920 0.134744 0.226058 0.005562 0.218020 0.450501 0.703003 0.998888 0.002225 0.264739 0.502781 0.747497 0.997775 0.001112 0.281424 0.560623 0.763070 1.000000 0.058954 0.085651 0.074527 0.065628 0.051168 0.060067 0.030033 0.065628 0.064516 0.047831 0.040044 0.012236 0.032258 0.012236 0.043382 0.125695 0.055617 0.018910 0.036707 0.018910 
>YBR056w
0.353293 0.347305 0.299401 0.266000 0.206000 0.236000 0.011976 0.247505 0.520958 0.800399 0.998004 0.005988 0.241517 0.473054 0.722555 1.000000 0.001996 0.249501 0.477046 0.734531 0.994012 0.524950 0.125749 0.349301 0.050000 0.082000 0.006000 0.001996 0.237525 0.473054 0.766467 1.000000 0.025948 0.251497 0.530938 0.742515 0.950100 0.027944 0.231537 0.502994 0.726547 0.994012 0.594810 0.356000 0.007984 0.263473 0.518962 0.740519 0.994012 0.359281 0.333333 0.307385 0.274000 0.202000 0.186000 0.005988 0.251497 0.504990 0.724551 0.990020 0.003992 0.249501 0.469062 0.708583 0.996008 0.001996 0.231537 0.542914 0.802395 1.000000 0.341317 0.269461 0.389222 0.202000 0.274000 0.226000 0.001996 0.239521 0.475050 0.734531 1.000000 0.005988 0.243513 0.473054 0.718563 0.986028 0.011976 0.247505 0.520958 0.802395 0.998004 0.313373 0.379242 0.307385 0.254000 0.170000 0.218000 0.005988 0.243513 0.524950 0.736527 0.990020 0.003992 0.251497 0.469062 0.686627 0.996008 0.001996 0.231537 0.542914 0.802395 1.000000 0.029940 0.095808 0.063872 0.081836 0.035928 0.045908 0.073852 0.053892 0.069860 0.033932 0.037924 0.035928 0.041916 0.007984 0.051896 0.065868 0.069860 0.015968 0.047904 0.039920 
>YBR056w-a
0.242424 0.363636 0.393939 0.261538 0.138462 0.200000 0.030303 0.136364 0.348485 0.484848 0.863636 0.045455 0.181818 0.378788 0.666667 0.984848 0.015152 0.515152 0.696970 0.818182 1.000000 0.681818 0.060606 0.257576 0.030769 0.030769 0.000000 0.015152 0.166667 0.393939 0.560606 1.000000 0.303030 0.303030 0.318182 0.333333 0.348485 0.636364 0.681818 0.742424 0.803030 0.878788 0.500000 0.246154 0.075758 0.333333 0.651515 0.803030 0.939394 0.530303 0.303030 0.166667 0.353846 0.046154 0.107692 0.121212 0.409091 0.590909 0.787879 0.984848 0.060606 0.242424 0.363636 0.742424 0.878788 0.015152 0.030303 0.090909 0.196970 1.000000 0.469697 0.272727 0.257576 0.153846 0.184615 0.184615 0.015152 0.303030 0.590909 0.803030 1.000000 0.121212 0.257576 0.424242 0.681818 0.984848 0.030303 0.106061 0.272727 0.469697 0.863636 0.181818 0.651515 0.166667 0.230769 0.015385 0.138462 0.378788 0.606061 0.681818 0.924242 0.984848 0.060606 0.272727 0.500000 0.742424 0.939394 0.015152 0.030303 0.090909 0.196970 1.000000 0.030303 0.000000 0.000000 0.045455 0.121212 0.045455 0.060606 0.045455 0.030303 0.000000 0.136364 0.015152 0.075758 0.212121 0.015152 0.060606 0.060606 0.045455 0.000000 0.000000 
>YBR057c
0.401639 0.360656 0.237705 0.282192 0.213699 0.194521 0.005464 0.292350 0.540984 0.748634 1.000000 0.008197 0.191257 0.407104 0.729508 0.997268 0.002732 0.289617 0.532787 0.754098 0.994536 0.489071 0.030055 0.480874 0.021918 0.060274 0.000000 0.002732 0.188525 0.327869 0.450820 1.000000 0.008197 0.010929 0.040984 0.467213 0.661202 0.076503 0.565574 0.732240 0.866120 0.994536 0.401639 0.416438 0.008197 0.215847 0.396175 0.650273 0.956284 0.330601 0.428962 0.240437 0.287671 0.156164 0.219178 0.013661 0.196721 0.398907 0.713115 0.997268 0.005464 0.292350 0.554645 0.754098 1.000000 0.002732 0.251366 0.508197 0.737705 0.986339 0.270492 0.297814 0.431694 0.183562 0.273973 0.232877 0.002732 0.256831 0.527322 0.754098 0.994536 0.013661 0.196721 0.407104 0.729508 0.997268 0.005464 0.284153 0.540984 0.743169 1.000000 0.289617 0.469945 0.240437 0.268493 0.136986 0.238356 0.013661 0.199454 0.415301 0.751366 0.997268 0.005464 0.267760 0.540984 0.745902 1.000000 0.002732 0.251366 0.508197 0.737705 0.986339 0.027322 0.068306 0.092896 0.030055 0.049180 0.133880 0.027322 0.073770 0.101093 0.057377 0.038251 0.030055 0.032787 0.002732 0.027322 0.092896 0.032787 0.054645 0.024590 0.002732 
>YBR058c
0.373880 0.312420 0.313700 0.194872 0.251282 0.212821 0.003841 0.240717 0.516005 0.743918 0.998720 0.002561 0.247119 0.485275 0.750320 0.997439 0.001280 0.258643 0.489117 0.734955 1.000000 0.551857 0.171575 0.276569 0.066667 0.064103 0.005128 0.001280 0.247119 0.490397 0.741357 1.000000 0.012804 0.151088 0.572343 0.923175 0.998720 0.003841 0.344430 0.509603 0.756722 0.879641 0.482714 0.356410 0.006402 0.268886 0.508323 0.773367 0.996159 0.359795 0.418694 0.221511 0.300000 0.162821 0.176923 0.002561 0.250960 0.499360 0.749040 1.000000 0.003841 0.229193 0.471191 0.728553 0.992318 0.001280 0.286812 0.535211 0.796415 0.998720 0.344430 0.261204 0.394366 0.200000 0.276923 0.187179 0.001280 0.261204 0.489117 0.747759 1.000000 0.002561 0.247119 0.499360 0.749040 0.997439 0.003841 0.235595 0.508323 0.743918 0.998720 0.271447 0.507042 0.221511 0.262821 0.119231 0.220513 0.002561 0.266325 0.504481 0.758003 0.997439 0.003841 0.235595 0.478873 0.728553 1.000000 0.001280 0.286812 0.535211 0.796415 0.998720 0.028169 0.070423 0.071703 0.064020 0.047375 0.092190 0.042254 0.042254 0.079385 0.043534 0.053777 0.020487 0.030730 0.034571 0.056338 0.094750 0.056338 0.019206 0.038412 0.014085 
>YBR058c-a
0.212500 0.362500 0.425000 0.189873 0.088608 0.392405 0.037500 0.200000 0.262500 0.400000 0.950000 0.025000 0.162500 0.487500 0.650000 0.962500 0.012500 0.425000 0.675000 0.825000 1.000000 0.237500 0.037500 0.725000 0.025316 0.075949 0.000000 0.012500 0.050000 0.150000 0.275000 1.000000 0.100000 0.100000 0.100000 0.112500 0.125000 0.187500 0.412500 0.600000 0.787500 0.975000 0.662500 0.227848 0.087500 0.425000 0.612500 0.787500 0.975000 0.275000 0.337500 0.387500 0.189873 0.240506 0.278481 0.025000 0.162500 0.375000 0.687500 0.975000 0.037500 0.312500 0.425000 0.737500 1.000000 0.012500 0.225000 0.537500 0.750000 0.987500 0.500000 0.250000 0.250000 0.253165 0.151899 0.151899 0.012500 0.437500 0.625000 0.825000 1.000000 0.025000 0.162500 0.325000 0.662500 0.912500 0.037500 0.200000 0.287500 0.450000 0.950000 0.237500 0.375000 0.387500 0.177215 0.202532 0.316456 0.025000 0.162500 0.325000 0.687500 0.912500 0.037500 0.312500 0.437500 0.737500 1.000000 0.012500 0.225000 0.537500 0.750000 0.987500 0.025000 0.075000 0.062500 0.012500 0.012500 0.025000 0.037500 0.025000 0.087500 0.075000 0.025000 0.037500 0.075000 0.012500 0.050000 0.112500 0.075000 0.037500 0.125000 0.012500 
>YBR059c
0.384477 0.385379 0.230144 0.261066 0.187895 0.163505 0.004513 0.312274 0.542419 0.754513 1.000000 0.001805 0.294224 0.537906 0.786101 0.998195 0.000903 0.157942 0.314079 0.640794 0.996390 0.647112 0.108303 0.244585 0.053297 0.060524 0.000903 0.000903 0.324910 0.507220 0.780686 1.000000 0.031588 0.101986 0.538809 0.761733 0.996390 0.027978 0.226534 0.334838 0.656137 0.978339 0.354693 0.339657 0.002708 0.182310 0.387184 0.675993 0.996390 0.381769 0.393502 0.224729 0.271003 0.160795 0.168022 0.001805 0.305957 0.549639 0.787004 0.998195 0.002708 0.229242 0.443141 0.670578 0.999097 0.000903 0.231949 0.495487 0.803249 1.000000 0.262635 0.329422 0.407942 0.155375 0.223126 0.238482 0.000903 0.159747 0.310469 0.627256 0.996390 0.001805 0.350181 0.554152 0.786101 0.998195 0.004513 0.309567 0.543321 0.765343 1.000000 0.334838 0.440433 0.224729 0.261066 0.140018 0.188799 0.001805 0.350181 0.572202 0.798736 0.998195 0.002708 0.222924 0.442238 0.669675 0.999097 0.000903 0.231949 0.495487 0.803249 1.000000 0.051444 0.057762 0.062274 0.046931 0.087545 0.078520 0.053249 0.056859 0.123646 0.054152 0.041516 0.023466 0.032491 0.005415 0.046029 0.073105 0.046029 0.027978 0.030686 0.000903 
>YBR060c
0.385484 0.337097 0.277419 0.243942 0.211632 0.166397 0.004839 0.190323 0.432258 0.690323 0.996774 0.006452 0.267742 0.487097 0.745161 0.998387 0.001613 0.385484 0.604839 0.779032 1.000000 0.590323 0.091935 0.317742 0.033926 0.079160 0.001616 0.001613 0.156452 0.324194 0.635484 1.000000 0.080645 0.511290 0.725806 0.787097 0.972581 0.135484 0.480645 0.620968 0.841935 0.996774 0.377419 0.306947 0.011290 0.498387 0.679032 0.800000 0.995161 0.340323 0.380645 0.279032 0.232633 0.171244 0.231018 0.006452 0.240323 0.429032 0.737097 0.998387 0.003226 0.266129 0.559677 0.761290 1.000000 0.001613 0.222581 0.474194 0.738710 0.990323 0.308065 0.288710 0.403226 0.159935 0.247173 0.205170 0.001613 0.387097 0.596774 0.774194 1.000000 0.006452 0.250000 0.429032 0.745161 0.998387 0.004839 0.190323 0.437097 0.698387 0.996774 0.280645 0.440323 0.279032 0.253635 0.147011 0.255250 0.006452 0.240323 0.435484 0.772581 0.998387 0.003226 0.262903 0.538710 0.740323 1.000000 0.001613 0.222581 0.474194 0.738710 0.990323 0.050000 0.100000 0.069355 0.046774 0.043548 0.075806 0.035484 0.040323 0.083871 0.074194 0.054839 0.017742 0.030645 0.004839 0.048387 0.087097 0.056452 0.027419 0.046774 0.006452 
>YBR061c
0.329032 0.364516 0.306452 0.213592 0.213592 0.194175 0.009677 0.190323 0.441935 0.725806 0.993548 0.006452 0.287097 0.525806 0.825806 0.996774 0.003226 0.270968 0.496774 0.719355 1.000000 0.558065 0.164516 0.277419 0.064725 0.051780 0.000000 0.003226 0.248387 0.616129 0.787097 1.000000 0.148387 0.303226 0.529032 0.716129 0.909677 0.035484 0.112903 0.438710 0.554839 0.990323 0.529032 0.330097 0.032258 0.261290 0.454839 0.648387 0.987097 0.425806 0.322581 0.251613 0.258900 0.220065 0.152104 0.006452 0.277419 0.516129 0.780645 0.996774 0.035484 0.270968 0.480645 0.735484 1.000000 0.003226 0.145161 0.467742 0.696774 0.993548 0.335484 0.316129 0.348387 0.184466 0.249191 0.203883 0.003226 0.270968 0.500000 0.719355 1.000000 0.006452 0.287097 0.541935 0.832258 0.996774 0.009677 0.203226 0.438710 0.735484 0.993548 0.345161 0.403226 0.251613 0.275081 0.190939 0.181230 0.006452 0.245161 0.509677 0.780645 0.996774 0.035484 0.277419 0.493548 0.741935 1.000000 0.003226 0.145161 0.467742 0.696774 0.993548 0.048387 0.080645 0.038710 0.083871 0.045161 0.032258 0.051613 0.061290 0.103226 0.045161 0.054839 0.019355 0.029032 0.025806 0.054839 0.112903 0.038710 0.016129 0.048387 0.009677 
>YBR062c
0.372222 0.344444 0.283333 0.223464 0.212291 0.184358 0.027778 0.166667 0.427778 0.666667 0.972222 0.011111 0.255556 0.488889 0.716667 1.000000 0.005556 0.344444 0.605556 0.783333 0.988889 0.594444 0.055556 0.350000 0.027933 0.117318 0.016760 0.005556 0.266667 0.533333 0.744444 1.000000 0.344444 0.544444 0.622222 0.683333 0.700000 0.027778 0.194444 0.405556 0.766667 0.950000 0.411111 0.379888 0.022222 0.327778 0.527778 0.744444 0.994444 0.377778 0.400000 0.222222 0.240223 0.201117 0.150838 0.011111 0.283333 0.500000 0.766667 1.000000 0.027778 0.200000 0.411111 0.705556 0.966667 0.005556 0.238889 0.555556 0.738889 0.994444 0.316667 0.277778 0.405556 0.178771 0.251397 0.206704 0.005556 0.344444 0.616667 0.772222 0.994444 0.011111 0.255556 0.472222 0.677778 1.000000 0.027778 0.172222 0.433333 0.716667 0.972222 0.305556 0.472222 0.222222 0.201117 0.162011 0.189944 0.011111 0.255556 0.466667 0.750000 1.000000 0.027778 0.227778 0.488889 0.722222 0.966667 0.005556 0.238889 0.555556 0.738889 0.994444 0.050000 0.038889 0.111111 0.061111 0.066667 0.044444 0.066667 0.033333 0.083333 0.061111 0.033333 0.033333 0.033333 0.038889 0.033333 0.111111 0.033333 0.027778 0.022222 0.016667 
>YBR063c
0.353960 0.319307 0.326733 0.210918 0.205955 0.203474 0.004950 0.284653 0.507426 0.784653 0.995050 0.012376 0.242574 0.495050 0.688119 1.000000 0.002475 0.232673 0.475248 0.757426 0.987624 0.487624 0.153465 0.358911 0.071960 0.062035 0.012407 0.002475 0.324257 0.487624 0.668317 1.000000 0.049505 0.349010 0.524752 0.680693 0.990099 0.007426 0.188119 0.492574 0.831683 0.955446 0.522277 0.411911 0.009901 0.193069 0.482673 0.740099 0.992574 0.349010 0.393564 0.257426 0.258065 0.210918 0.193548 0.012376 0.242574 0.482673 0.693069 1.000000 0.004950 0.247525 0.472772 0.764851 0.995050 0.002475 0.235149 0.549505 0.782178 0.997525 0.361386 0.274752 0.363861 0.223325 0.245658 0.176179 0.002475 0.232673 0.487624 0.757426 0.997525 0.012376 0.237624 0.477723 0.678218 1.000000 0.004950 0.287129 0.509901 0.787129 0.995050 0.306931 0.435644 0.257426 0.263027 0.186104 0.218362 0.012376 0.230198 0.467822 0.693069 1.000000 0.004950 0.259901 0.500000 0.764851 0.995050 0.002475 0.235149 0.549505 0.782178 0.997525 0.059406 0.069307 0.071782 0.061881 0.019802 0.071782 0.039604 0.024752 0.101485 0.079208 0.029703 0.009901 0.034653 0.012376 0.051980 0.079208 0.099010 0.024752 0.051980 0.007426 
>YBR065c
0.362637 0.315934 0.321429 0.220386 0.236915 0.203857 0.005495 0.260989 0.475275 0.752747 0.991758 0.021978 0.313187 0.535714 0.766484 0.997253 0.002747 0.208791 0.480769 0.719780 1.000000 0.598901 0.189560 0.211538 0.088154 0.060606 0.022039 0.002747 0.269231 0.494505 0.758242 1.000000 0.068681 0.200549 0.629121 0.766484 0.906593 0.032967 0.244505 0.387363 0.708791 0.887363 0.445055 0.391185 0.013736 0.225275 0.508242 0.744505 0.994505 0.362637 0.387363 0.250000 0.286501 0.159780 0.173554 0.008242 0.241758 0.500000 0.755495 0.997253 0.005495 0.236264 0.467033 0.706044 1.000000 0.002747 0.274725 0.543956 0.785714 0.991758 0.332418 0.288462 0.379121 0.181818 0.264463 0.203857 0.002747 0.208791 0.480769 0.708791 1.000000 0.021978 0.335165 0.552198 0.802198 0.997253 0.005495 0.241758 0.475275 0.736264 0.991758 0.291209 0.458791 0.250000 0.247934 0.132231 0.201102 0.008242 0.337912 0.560440 0.807692 0.997253 0.005495 0.195055 0.428571 0.689560 1.000000 0.002747 0.274725 0.543956 0.785714 0.991758 0.041209 0.118132 0.054945 0.046703 0.024725 0.076923 0.043956 0.043956 0.093407 0.063187 0.043956 0.016484 0.010989 0.027473 0.035714 0.109890 0.085165 0.016484 0.035714 0.010989 
>YBR066c
0.363636 0.386364 0.250000 0.251142 0.178082 0.191781 0.027273 0.281818 0.518182 0.813636 0.986364 0.009091 0.354545 0.559091 0.750000 1.000000 0.004545 0.159091 0.336364 0.622727 0.968182 0.781818 0.054545 0.163636 0.054795 0.036530 0.000000 0.004545 0.268182 0.472727 0.668182 1.000000 0.113636 0.418182 0.700000 0.822727 0.872727 0.040909 0.077273 0.763636 0.895455 0.936364 0.313636 0.356164 0.022727 0.195455 0.359091 0.736364 0.931818 0.404545 0.286364 0.309091 0.214612 0.246575 0.187215 0.009091 0.286364 0.472727 0.718182 1.000000 0.013636 0.200000 0.468182 0.659091 0.986364 0.004545 0.250000 0.595455 0.822727 0.981818 0.268182 0.322727 0.409091 0.182648 0.223744 0.223744 0.004545 0.159091 0.336364 0.622727 0.968182 0.009091 0.331818 0.527273 0.722727 1.000000 0.027273 0.286364 0.554545 0.822727 0.986364 0.327273 0.363636 0.309091 0.200913 0.205479 0.228311 0.009091 0.304545 0.513636 0.722727 1.000000 0.013636 0.200000 0.472727 0.704545 0.986364 0.004545 0.250000 0.595455 0.822727 0.981818 0.063636 0.109091 0.036364 0.045455 0.031818 0.077273 0.054545 0.036364 0.100000 0.090909 0.040909 0.045455 0.018182 0.036364 0.009091 0.059091 0.072727 0.022727 0.045455 0.004545 
>YBR067c
0.161905 0.614286 0.223810 0.196172 0.100478 0.244019 0.023810 0.200000 0.380952 0.585714 0.914286 0.009524 0.328571 0.595238 0.761905 0.985714 0.004762 0.152381 0.319048 0.514286 1.000000 0.590476 0.019048 0.390476 0.009569 0.066986 0.009569 0.004762 0.385714 0.623810 0.771429 1.000000 0.152381 0.152381 0.361905 0.366667 0.371429 0.014286 0.138095 0.295238 0.504762 0.995238 0.395238 0.315789 0.014286 0.166667 0.361905 0.509524 0.980952 0.623810 0.276190 0.100000 0.311005 0.119617 0.066986 0.009524 0.323810 0.590476 0.761905 0.985714 0.014286 0.171429 0.366667 0.642857 1.000000 0.004762 0.204762 0.352381 0.452381 0.942857 0.247619 0.585714 0.166667 0.248804 0.114833 0.191388 0.004762 0.171429 0.328571 0.495238 1.000000 0.009524 0.347619 0.609524 0.771429 0.985714 0.023810 0.185714 0.342857 0.585714 0.914286 0.590476 0.309524 0.100000 0.354067 0.114833 0.071770 0.009524 0.323810 0.590476 0.766667 0.985714 0.014286 0.190476 0.385714 0.704762 1.000000 0.004762 0.204762 0.352381 0.452381 0.942857 0.009524 0.023810 0.047619 0.038095 0.023810 0.019048 0.038095 0.200000 0.233333 0.080952 0.033333 0.004762 0.023810 0.000000 0.071429 0.071429 0.042857 0.009524 0.023810 0.004762 
>YBR068c
0.233169 0.397373 0.369458 0.167763 0.141447 0.282895 0.008210 0.151067 0.515599 0.806240 0.990148 0.004926 0.208539 0.459770 0.681445 0.995074 0.001642 0.313629 0.540230 0.760263 1.000000 0.369458 0.034483 0.596059 0.011513 0.090461 0.008224 0.001642 0.105090 0.431856 0.694581 1.000000 0.034483 0.085386 0.167488 0.507389 0.937603 0.031199 0.344828 0.551724 0.761905 0.996716 0.651888 0.194079 0.004926 0.310345 0.509031 0.732348 0.998358 0.385878 0.346470 0.267652 0.254934 0.200658 0.192434 0.004926 0.197044 0.458128 0.699507 1.000000 0.003284 0.302135 0.530378 0.743842 0.985222 0.001642 0.264368 0.504105 0.812808 0.998358 0.417077 0.331691 0.251232 0.259868 0.174342 0.157895 0.001642 0.313629 0.541872 0.765189 1.000000 0.004926 0.193760 0.453202 0.673235 0.991790 0.008210 0.157635 0.515599 0.801314 0.995074 0.338259 0.394089 0.267652 0.248355 0.175987 0.217105 0.004926 0.177340 0.443350 0.689655 0.991790 0.003284 0.310345 0.540230 0.742200 1.000000 0.001642 0.264368 0.504105 0.812808 0.998358 0.036125 0.049261 0.041051 0.037767 0.026273 0.042693 0.080460 0.082102 0.090312 0.047619 0.031199 0.018062 0.047619 0.016420 0.062397 0.088670 0.085386 0.027915 0.073892 0.014778 
>YBR069c
0.240711 0.378029 0.381260 0.182848 0.127832 0.270227 0.003231 0.130856 0.495961 0.794830 0.995153 0.006462 0.235864 0.470113 0.704362 0.993538 0.001616 0.311793 0.533118 0.746365 1.000000 0.363489 0.030695 0.605816 0.006472 0.093851 0.012945 0.001616 0.090468 0.424879 0.777060 1.000000 0.159935 0.164782 0.487884 0.904685 0.993538 0.096931 0.323102 0.529887 0.738288 0.995153 0.631664 0.197411 0.033926 0.310178 0.500808 0.726979 0.998384 0.376414 0.376414 0.247173 0.288026 0.192557 0.168285 0.003231 0.227787 0.470113 0.709208 1.000000 0.008078 0.268174 0.497577 0.722132 0.995153 0.001616 0.263328 0.531502 0.806139 0.998384 0.420032 0.318255 0.261712 0.262136 0.155340 0.177994 0.001616 0.310178 0.528271 0.746365 1.000000 0.006462 0.219709 0.468498 0.699515 0.993538 0.003231 0.130856 0.497577 0.794830 0.995153 0.316640 0.436187 0.247173 0.279935 0.156958 0.203883 0.003231 0.214863 0.468498 0.714055 0.993538 0.008078 0.268174 0.500808 0.718901 1.000000 0.001616 0.263328 0.531502 0.806139 0.998384 0.037157 0.048465 0.046850 0.035541 0.030695 0.042003 0.069467 0.074313 0.096931 0.040388 0.037157 0.021002 0.038772 0.022617 0.084006 0.096931 0.075929 0.019386 0.064620 0.017771 
>YBR070c
0.244726 0.337553 0.417722 0.148305 0.207627 0.224576 0.008439 0.223629 0.447257 0.738397 0.974684 0.012658 0.215190 0.455696 0.696203 0.987342 0.004219 0.253165 0.569620 0.759494 1.000000 0.333333 0.202532 0.464135 0.072034 0.072034 0.004237 0.004219 0.215190 0.468354 0.789030 1.000000 0.181435 0.253165 0.666667 0.827004 0.978903 0.012658 0.282700 0.535865 0.691983 0.949367 0.683544 0.288136 0.016878 0.244726 0.535865 0.729958 0.987342 0.308017 0.396624 0.295359 0.186441 0.177966 0.258475 0.012658 0.210970 0.455696 0.700422 0.987342 0.025316 0.257384 0.552743 0.776371 1.000000 0.004219 0.244726 0.468354 0.670886 0.983122 0.459916 0.265823 0.274262 0.173729 0.258475 0.156780 0.004219 0.257384 0.552743 0.759494 1.000000 0.012658 0.172996 0.426160 0.696203 0.987342 0.008439 0.236287 0.447257 0.683544 0.974684 0.261603 0.443038 0.295359 0.190678 0.148305 0.288136 0.012658 0.168776 0.400844 0.687764 0.987342 0.025316 0.291139 0.569620 0.772152 1.000000 0.004219 0.244726 0.468354 0.670886 0.983122 0.046414 0.080169 0.042194 0.025316 0.029536 0.021097 0.067511 0.046414 0.071730 0.050633 0.029536 0.029536 0.042194 0.016878 0.080169 0.139241 0.084388 0.021097 0.059072 0.016878 
>YBR071w
0.355450 0.426540 0.218009 0.300000 0.138095 0.166667 0.014218 0.227488 0.478673 0.729858 0.990521 0.023697 0.208531 0.464455 0.663507 0.981043 0.004739 0.341232 0.625592 0.815166 1.000000 0.630332 0.090047 0.279621 0.042857 0.061905 0.004762 0.004739 0.180095 0.507109 0.744076 1.000000 0.142180 0.156398 0.777251 0.819905 0.881517 0.085308 0.383886 0.454976 0.672986 0.909953 0.317536 0.304762 0.104265 0.369668 0.668246 0.810427 0.985782 0.459716 0.284360 0.255924 0.290476 0.214286 0.147619 0.023697 0.255924 0.526066 0.744076 0.990521 0.009479 0.274882 0.530806 0.763033 0.985782 0.004739 0.194313 0.431280 0.691943 1.000000 0.232227 0.379147 0.388626 0.142857 0.180952 0.295238 0.004739 0.364929 0.625592 0.786730 1.000000 0.023697 0.241706 0.469194 0.663507 0.981043 0.014218 0.222749 0.473934 0.725118 0.990521 0.436019 0.308057 0.255924 0.333333 0.209524 0.152381 0.023697 0.251185 0.540284 0.772512 0.990521 0.009479 0.274882 0.511848 0.758294 0.985782 0.004739 0.194313 0.431280 0.691943 1.000000 0.052133 0.085308 0.056872 0.075829 0.033175 0.052133 0.023697 0.052133 0.199052 0.085308 0.018957 0.033175 0.014218 0.004739 0.004739 0.094787 0.042654 0.033175 0.037915 0.000000 
>YBR072c-a
0.301887 0.396226 0.301887 0.346154 0.115385 0.250000 0.113208 0.264151 0.377358 0.716981 0.981132 0.037736 0.207547 0.452830 0.603774 1.000000 0.018868 0.226415 0.679245 0.773585 0.962264 0.641509 0.169811 0.188679 0.076923 0.038462 0.076923 0.018868 0.207547 0.377358 0.603774 1.000000 0.056604 0.075472 0.396226 0.433962 0.811321 0.622642 0.641509 0.698113 0.735849 0.830189 0.433962 0.384615 0.056604 0.226415 0.528302 0.754717 0.943396 0.377358 0.301887 0.320755 0.192308 0.326923 0.230769 0.094340 0.245283 0.471698 0.660377 1.000000 0.056604 0.358491 0.622642 0.754717 0.962264 0.018868 0.169811 0.339623 0.547170 0.981132 0.301887 0.320755 0.377358 0.134615 0.230769 0.346154 0.018868 0.226415 0.679245 0.773585 0.962264 0.094340 0.207547 0.452830 0.641509 1.000000 0.037736 0.264151 0.415094 0.622642 0.981132 0.358491 0.320755 0.320755 0.192308 0.288462 0.269231 0.094340 0.207547 0.471698 0.660377 1.000000 0.056604 0.245283 0.509434 0.735849 0.962264 0.018868 0.169811 0.339623 0.547170 0.981132 0.132075 0.056604 0.000000 0.056604 0.018868 0.037736 0.000000 0.037736 0.169811 0.094340 0.018868 0.075472 0.000000 0.000000 0.037736 0.094340 0.113208 0.018868 0.037736 0.000000 
>YBR072w
0.392523 0.341121 0.266355 0.244131 0.220657 0.197183 0.018692 0.252336 0.542056 0.742991 1.000000 0.009346 0.228972 0.439252 0.761682 0.995327 0.004673 0.242991 0.457944 0.700935 0.990654 0.565421 0.299065 0.135514 0.079812 0.042254 0.004695 0.004673 0.182243 0.401869 0.682243 1.000000 0.443925 0.574766 0.691589 0.831776 0.976636 0.032710 0.098131 0.289720 0.327103 0.813084 0.392523 0.403756 0.014019 0.261682 0.490654 0.714953 0.962617 0.392523 0.364486 0.242991 0.286385 0.230047 0.159624 0.009346 0.228972 0.429907 0.761682 0.995327 0.018692 0.266355 0.556075 0.752336 1.000000 0.004673 0.210280 0.485981 0.738318 0.990654 0.299065 0.294393 0.406542 0.211268 0.262911 0.192488 0.004673 0.271028 0.485981 0.738318 0.990654 0.009346 0.219626 0.420561 0.761682 0.995327 0.018692 0.252336 0.542056 0.742991 1.000000 0.327103 0.429907 0.242991 0.295775 0.183099 0.206573 0.009346 0.224299 0.429907 0.728972 0.995327 0.018692 0.266355 0.518692 0.757009 1.000000 0.004673 0.210280 0.485981 0.738318 0.990654 0.037383 0.093458 0.056075 0.098131 0.023364 0.084112 0.070093 0.051402 0.074766 0.032710 0.065421 0.014019 0.032710 0.000000 0.084112 0.074766 0.042056 0.004673 0.051402 0.009346 
>YBR073w
0.350649 0.338745 0.310606 0.234020 0.200433 0.201517 0.002165 0.254329 0.536797 0.795455 1.000000 0.004329 0.185065 0.440476 0.713203 0.992424 0.001082 0.313853 0.508658 0.737013 0.996753 0.484848 0.124459 0.390693 0.049837 0.086674 0.004334 0.001082 0.190476 0.372294 0.734848 1.000000 0.023810 0.115801 0.468615 0.759740 0.996753 0.040043 0.400433 0.579004 0.748918 0.981602 0.462121 0.320693 0.003247 0.324675 0.510823 0.742424 0.996753 0.377706 0.370130 0.252165 0.274106 0.180932 0.177681 0.004329 0.209957 0.474026 0.744589 0.995671 0.002165 0.287879 0.514069 0.753247 1.000000 0.001082 0.234848 0.497835 0.740260 0.997835 0.336580 0.299784 0.363636 0.199350 0.235103 0.205850 0.001082 0.298701 0.503247 0.730519 0.996753 0.004329 0.183983 0.418831 0.711039 0.992424 0.002165 0.256494 0.537879 0.801948 1.000000 0.314935 0.432900 0.252165 0.273023 0.149512 0.209101 0.019481 0.213203 0.490260 0.755411 0.992424 0.002165 0.274892 0.503247 0.746753 1.000000 0.001082 0.234848 0.497835 0.740260 0.997835 0.049784 0.091991 0.051948 0.059524 0.037879 0.059524 0.053030 0.042208 0.085498 0.074675 0.044372 0.012987 0.025974 0.018398 0.047619 0.109307 0.063853 0.024892 0.040043 0.006494 
>YBR074w
0.293033 0.370902 0.336066 0.215385 0.176410 0.260513 0.002049 0.217213 0.540984 0.774590 0.995902 0.005123 0.248975 0.495902 0.736680 0.996926 0.001025 0.285861 0.483607 0.729508 1.000000 0.421107 0.157787 0.421107 0.049231 0.063590 0.006154 0.001025 0.261270 0.587090 0.809426 1.000000 0.104508 0.197746 0.743852 0.857582 0.998975 0.004098 0.266393 0.439549 0.640369 0.980533 0.637295 0.268718 0.007172 0.264344 0.463115 0.714139 0.996926 0.361680 0.386270 0.252049 0.273846 0.195897 0.176410 0.005123 0.257172 0.514344 0.748975 0.996926 0.003074 0.241803 0.525615 0.764344 1.000000 0.001025 0.226434 0.439549 0.706967 0.994877 0.381148 0.299180 0.319672 0.237949 0.227692 0.180513 0.001025 0.272541 0.478484 0.721311 1.000000 0.005123 0.251025 0.506148 0.751025 0.996926 0.002049 0.217213 0.543033 0.774590 0.995902 0.316598 0.431352 0.252049 0.254359 0.170256 0.202051 0.005123 0.247951 0.503074 0.734631 0.996926 0.003074 0.258197 0.535861 0.770492 1.000000 0.001025 0.226434 0.439549 0.706967 0.994877 0.039959 0.052254 0.052254 0.053279 0.036885 0.058402 0.046107 0.047131 0.107582 0.062500 0.035861 0.026639 0.045082 0.009221 0.054303 0.115779 0.068648 0.017418 0.057377 0.013320 
>YBR076w
0.365782 0.327434 0.306785 0.269231 0.245562 0.189349 0.020649 0.238938 0.510324 0.764012 0.997050 0.005900 0.221239 0.469027 0.737463 1.000000 0.002950 0.274336 0.519174 0.722714 0.973451 0.410029 0.097345 0.492625 0.056213 0.109467 0.008876 0.002950 0.159292 0.300885 0.663717 1.000000 0.011799 0.230088 0.539823 0.648968 0.843658 0.117994 0.371681 0.557522 0.811209 0.991150 0.528024 0.426036 0.008850 0.277286 0.501475 0.761062 0.991150 0.309735 0.356932 0.333333 0.248521 0.230769 0.213018 0.008850 0.221239 0.474926 0.755162 0.994100 0.011799 0.315634 0.539823 0.764012 0.985251 0.002950 0.197640 0.436578 0.690265 1.000000 0.371681 0.224189 0.404130 0.153846 0.325444 0.224852 0.002950 0.274336 0.519174 0.740413 1.000000 0.008850 0.250737 0.469027 0.719764 0.991150 0.020649 0.233038 0.489676 0.752212 0.997050 0.238938 0.427729 0.333333 0.221893 0.180473 0.263314 0.020649 0.221239 0.513274 0.772861 0.994100 0.008850 0.294985 0.533923 0.746313 0.985251 0.002950 0.197640 0.436578 0.690265 1.000000 0.050147 0.094395 0.061947 0.047198 0.038348 0.073746 0.035398 0.035398 0.073746 0.047198 0.032448 0.038348 0.064897 0.038348 0.026549 0.076696 0.079646 0.017699 0.056047 0.011799 
>YBR077c
0.320988 0.339506 0.339506 0.198758 0.223602 0.204969 0.043210 0.327160 0.506173 0.685185 0.987654 0.030864 0.216049 0.450617 0.722222 1.000000 0.006173 0.222222 0.469136 0.796296 0.993827 0.500000 0.185185 0.314815 0.074534 0.086957 0.024845 0.006173 0.179012 0.358025 0.629630 1.000000 0.018519 0.240741 0.617284 0.679012 0.895062 0.061728 0.407407 0.549383 0.820988 0.969136 0.537037 0.409938 0.024691 0.246914 0.462963 0.790123 0.981481 0.345679 0.413580 0.240741 0.285714 0.217391 0.173913 0.037037 0.246914 0.500000 0.728395 1.000000 0.012346 0.277778 0.469136 0.753086 0.993827 0.006173 0.141975 0.487654 0.716049 0.987654 0.382716 0.271605 0.345679 0.229814 0.260870 0.198758 0.006173 0.228395 0.586420 0.796296 0.993827 0.037037 0.240741 0.401235 0.740741 1.000000 0.030864 0.320988 0.506173 0.685185 0.987654 0.302469 0.456790 0.240741 0.267081 0.173913 0.217391 0.037037 0.240741 0.450617 0.703704 1.000000 0.012346 0.283951 0.518519 0.753086 0.993827 0.006173 0.141975 0.487654 0.716049 0.987654 0.012346 0.074074 0.074074 0.061728 0.018519 0.080247 0.043210 0.030864 0.104938 0.061728 0.030864 0.024691 0.043210 0.012346 0.049383 0.117284 0.074074 0.043210 0.037037 0.006173 
>YBR078w
0.235043 0.459402 0.305556 0.177730 0.188437 0.284797 0.004274 0.297009 0.457265 0.677350 1.000000 0.012821 0.198718 0.536325 0.794872 0.987179 0.002137 0.250000 0.476496 0.713675 0.997863 0.557692 0.269231 0.173077 0.134904 0.062099 0.014989 0.002137 0.264957 0.504274 0.722222 1.000000 0.076923 0.220085 0.482906 0.645299 0.995726 0.012821 0.100427 0.553419 0.918803 0.991453 0.478632 0.509636 0.006410 0.271368 0.506410 0.760684 0.997863 0.502137 0.371795 0.126068 0.364026 0.094218 0.107066 0.012821 0.194444 0.510684 0.777778 0.997863 0.004274 0.264957 0.461538 0.658120 0.995726 0.002137 0.344017 0.587607 0.858974 1.000000 0.316239 0.448718 0.235043 0.282655 0.194861 0.171306 0.002137 0.262821 0.491453 0.743590 0.997863 0.012821 0.194444 0.532051 0.786325 0.987179 0.004274 0.297009 0.457265 0.677350 1.000000 0.476496 0.397436 0.126068 0.361884 0.087794 0.113490 0.012821 0.194444 0.504274 0.773504 0.987179 0.004274 0.264957 0.476496 0.685897 0.997863 0.002137 0.344017 0.587607 0.858974 1.000000 0.008547 0.044872 0.023504 0.040598 0.034188 0.083333 0.064103 0.091880 0.194444 0.085470 0.012821 0.000000 0.010684 0.012821 0.061966 0.096154 0.072650 0.010684 0.049145 0.002137 
>YBR079c
0.409751 0.329876 0.260373 0.238837 0.227414 0.168224 0.007261 0.267635 0.558091 0.766598 1.000000 0.002075 0.265560 0.498963 0.801867 0.998963 0.001037 0.197095 0.414938 0.658714 0.994813 0.195021 0.015560 0.789419 0.006231 0.064382 0.002077 0.001037 0.282158 0.474066 0.913900 1.000000 0.139004 0.141079 0.496888 0.501037 0.509336 0.008299 0.247925 0.521784 0.742739 0.996888 0.327801 0.365524 0.008299 0.184647 0.340249 0.501037 0.993776 0.337137 0.397303 0.265560 0.258567 0.144341 0.217030 0.002075 0.240664 0.498963 0.794606 0.998963 0.009336 0.235477 0.487552 0.700207 0.994813 0.001037 0.266598 0.514523 0.771784 1.000000 0.292531 0.279046 0.428423 0.149533 0.273105 0.203531 0.001037 0.209544 0.411826 0.658714 0.994813 0.002075 0.265560 0.510373 0.839212 0.998963 0.007261 0.267635 0.558091 0.755187 1.000000 0.298755 0.435685 0.265560 0.275182 0.131880 0.229491 0.002075 0.239627 0.498963 0.790456 0.998963 0.003112 0.242739 0.488589 0.712656 0.994813 0.001037 0.266598 0.514523 0.771784 1.000000 0.061203 0.099585 0.117220 0.057054 0.043568 0.031120 0.026971 0.095436 0.066390 0.052905 0.037344 0.018672 0.032158 0.001037 0.058091 0.091286 0.056017 0.019710 0.028008 0.006224 
>YBR080c
0.344327 0.333773 0.321900 0.225892 0.254954 0.203435 0.003958 0.267810 0.509235 0.729551 0.997361 0.006596 0.216359 0.449868 0.742744 1.000000 0.001319 0.261214 0.515831 0.773087 0.994723 0.443272 0.184697 0.372032 0.072655 0.085865 0.003963 0.001319 0.199208 0.470976 0.692612 1.000000 0.036939 0.146438 0.267810 0.680739 0.914248 0.051451 0.412929 0.616095 0.800792 0.997361 0.556728 0.396301 0.002639 0.279683 0.514512 0.753298 0.994723 0.373351 0.394459 0.232190 0.280053 0.199472 0.166446 0.006596 0.234828 0.478892 0.746702 1.000000 0.005277 0.282322 0.532982 0.781003 0.997361 0.001319 0.217678 0.444591 0.717678 0.994723 0.340369 0.303430 0.356201 0.192867 0.276090 0.215324 0.001319 0.248021 0.513193 0.771768 0.994723 0.006596 0.242744 0.473615 0.745383 1.000000 0.003958 0.263852 0.506596 0.729551 0.997361 0.324538 0.443272 0.232190 0.287979 0.180978 0.184941 0.007916 0.238786 0.481530 0.732190 1.000000 0.005277 0.270449 0.527704 0.782322 0.997361 0.001319 0.217678 0.444591 0.717678 0.994723 0.052770 0.068602 0.055409 0.063325 0.031662 0.072559 0.069921 0.065963 0.072559 0.052770 0.042216 0.011873 0.018470 0.006596 0.062005 0.093668 0.079156 0.025066 0.051451 0.003958 
>YBR081c
0.450450 0.292793 0.256757 0.251690 0.219384 0.167543 0.002252 0.235736 0.482733 0.691441 1.000000 0.001502 0.278529 0.539039 0.794294 0.996997 0.000751 0.239489 0.537538 0.758258 0.998498 0.562312 0.074324 0.363363 0.039068 0.067618 0.006011 0.000751 0.267267 0.489489 0.720721 1.000000 0.050300 0.247748 0.604354 0.869369 0.973724 0.006006 0.234985 0.540541 0.759009 0.953453 0.397898 0.387678 0.003754 0.238739 0.562312 0.759760 0.996246 0.349099 0.415165 0.235736 0.296018 0.159279 0.205109 0.001502 0.269520 0.518769 0.791291 0.996997 0.002252 0.219219 0.481231 0.716216 1.000000 0.000751 0.255255 0.491742 0.737988 0.997748 0.282282 0.250751 0.466967 0.151766 0.259204 0.219384 0.000751 0.233483 0.515015 0.755255 0.998498 0.001502 0.280781 0.554805 0.828078 0.996997 0.002252 0.236486 0.481982 0.691441 1.000000 0.315315 0.448949 0.235736 0.283997 0.148760 0.215627 0.001502 0.263514 0.516517 0.790541 0.995495 0.002252 0.222973 0.484234 0.725225 1.000000 0.000751 0.255255 0.491742 0.737988 0.997748 0.034535 0.096847 0.104354 0.093844 0.042793 0.078078 0.036787 0.043544 0.081081 0.060060 0.029279 0.016517 0.025526 0.004505 0.038288 0.096096 0.055556 0.021021 0.035285 0.006006 
>YBR082c
0.263514 0.452703 0.283784 0.251701 0.129252 0.265306 0.033784 0.195946 0.554054 0.797297 0.979730 0.013514 0.222973 0.418919 0.736486 0.993243 0.006757 0.263514 0.533784 0.702703 1.000000 0.459459 0.209459 0.331081 0.095238 0.068027 0.000000 0.006757 0.304054 0.493243 0.655405 1.000000 0.148649 0.202703 0.256757 0.378378 0.574324 0.033784 0.108108 0.729730 0.898649 0.986486 0.472973 0.476190 0.020270 0.243243 0.486486 0.695946 0.986486 0.479730 0.277027 0.243243 0.265306 0.197279 0.136054 0.013514 0.189189 0.418919 0.729730 0.993243 0.047297 0.337838 0.574324 0.722973 1.000000 0.006757 0.263514 0.452703 0.864865 0.986486 0.331081 0.378378 0.290541 0.244898 0.204082 0.231293 0.006757 0.310811 0.506757 0.709459 1.000000 0.013514 0.189189 0.418919 0.716216 0.993243 0.033784 0.202703 0.540541 0.797297 0.979730 0.358108 0.398649 0.243243 0.299320 0.136054 0.197279 0.013514 0.189189 0.398649 0.716216 0.993243 0.047297 0.277027 0.554054 0.729730 1.000000 0.006757 0.263514 0.452703 0.864865 0.986486 0.027027 0.074324 0.033784 0.081081 0.013514 0.033784 0.040541 0.081081 0.094595 0.060811 0.101351 0.027027 0.047297 0.020270 0.033784 0.087838 0.074324 0.013514 0.033784 0.020270 
>YBR083w
0.372428 0.393004 0.234568 0.288660 0.177320 0.187629 0.008230 0.234568 0.467078 0.734568 0.995885 0.004115 0.248971 0.547325 0.804527 1.000000 0.002058 0.228395 0.440329 0.660494 0.997942 0.623457 0.059671 0.316872 0.037113 0.053608 0.008247 0.002058 0.234568 0.551440 0.790123 1.000000 0.047325 0.059671 0.150206 0.320988 0.849794 0.072016 0.341564 0.434156 0.728395 0.946502 0.411523 0.432990 0.016461 0.228395 0.497942 0.711934 0.977366 0.368313 0.384774 0.246914 0.270103 0.183505 0.200000 0.004115 0.195473 0.500000 0.720165 0.993827 0.006173 0.281893 0.489712 0.740741 0.995885 0.002058 0.288066 0.522634 0.759259 1.000000 0.279835 0.320988 0.399177 0.171134 0.220619 0.257732 0.002058 0.261317 0.481481 0.730453 1.000000 0.004115 0.242798 0.520576 0.783951 0.993827 0.008230 0.253086 0.479424 0.738683 0.995885 0.310700 0.442387 0.246914 0.265979 0.146392 0.237113 0.004115 0.187243 0.454733 0.695473 0.993827 0.006173 0.281893 0.524691 0.761317 0.995885 0.002058 0.288066 0.522634 0.759259 1.000000 0.037037 0.086420 0.082305 0.041152 0.049383 0.076132 0.037037 0.049383 0.125514 0.057613 0.051440 0.026749 0.045267 0.006173 0.037037 0.069959 0.069959 0.010288 0.034979 0.006173 
>YBR084c-a
0.449735 0.333333 0.216931 0.361702 0.148936 0.132979 0.015873 0.275132 0.550265 0.809524 0.994709 0.010582 0.253968 0.412698 0.682540 1.000000 0.005291 0.169312 0.497354 0.645503 0.978836 0.259259 0.031746 0.708995 0.015957 0.101064 0.005319 0.005291 0.190476 0.317460 0.476190 1.000000 0.116402 0.116402 0.126984 0.264550 0.275132 0.026455 0.333333 0.576720 0.809524 0.989418 0.296296 0.393617 0.021164 0.185185 0.507937 0.656085 0.978836 0.312169 0.338624 0.349206 0.244681 0.218085 0.234043 0.010582 0.195767 0.417989 0.767196 1.000000 0.015873 0.206349 0.507937 0.756614 0.989418 0.005291 0.317460 0.529101 0.708995 0.984127 0.238095 0.275132 0.486772 0.111702 0.191489 0.340426 0.005291 0.216931 0.502646 0.645503 0.978836 0.010582 0.195767 0.402116 0.693122 1.000000 0.015873 0.306878 0.571429 0.804233 0.994709 0.301587 0.349206 0.349206 0.244681 0.218085 0.234043 0.010582 0.211640 0.417989 0.767196 1.000000 0.015873 0.190476 0.497354 0.751323 0.989418 0.005291 0.317460 0.529101 0.708995 0.984127 0.148148 0.121693 0.063492 0.037037 0.037037 0.042328 0.047619 0.137566 0.047619 0.031746 0.010582 0.037037 0.021164 0.000000 0.074074 0.084656 0.037037 0.005291 0.005291 0.010582 
>YBR084w
0.306667 0.387692 0.305641 0.221766 0.213552 0.254620 0.004103 0.221538 0.512821 0.741538 0.996923 0.003077 0.266667 0.490256 0.763077 0.997949 0.001026 0.246154 0.495385 0.739487 1.000000 0.452308 0.154872 0.392821 0.082136 0.084189 0.006160 0.001026 0.290256 0.528205 0.776410 1.000000 0.019487 0.246154 0.465641 0.724103 0.994872 0.004103 0.184615 0.494359 0.736410 0.985641 0.595897 0.381930 0.005128 0.267692 0.500513 0.729231 0.997949 0.397949 0.373333 0.228718 0.319302 0.169405 0.169405 0.003077 0.265641 0.501538 0.752821 0.997949 0.002051 0.243077 0.486154 0.754872 0.998974 0.001026 0.207179 0.506667 0.738462 1.000000 0.331282 0.335385 0.333333 0.237166 0.251540 0.216632 0.001026 0.246154 0.489231 0.744615 1.000000 0.003077 0.281026 0.498462 0.760000 0.997949 0.004103 0.221538 0.503590 0.737436 0.996923 0.336410 0.434872 0.228718 0.314168 0.143737 0.195072 0.003077 0.270769 0.513846 0.760000 0.997949 0.002051 0.243077 0.476923 0.749744 0.998974 0.001026 0.207179 0.506667 0.738462 1.000000 0.043077 0.080000 0.058462 0.054359 0.028718 0.042051 0.074872 0.088205 0.065641 0.053333 0.053333 0.026667 0.025641 0.008205 0.080000 0.085128 0.078974 0.020513 0.029744 0.003077 
>YBR085c-a
0.329412 0.411765 0.258824 0.226190 0.154762 0.190476 0.082353 0.411765 0.517647 0.741176 0.988235 0.023529 0.164706 0.341176 0.682353 1.000000 0.011765 0.235294 0.552941 0.776471 0.952941 0.435294 0.223529 0.341176 0.083333 0.083333 0.035714 0.011765 0.152941 0.270588 0.635294 1.000000 0.070588 0.305882 0.552941 0.694118 0.800000 0.047059 0.411765 0.494118 0.870588 0.964706 0.411765 0.500000 0.058824 0.294118 0.552941 0.788235 0.952941 0.376471 0.400000 0.223529 0.285714 0.178571 0.190476 0.023529 0.188235 0.364706 0.752941 1.000000 0.058824 0.317647 0.552941 0.776471 0.988235 0.011765 0.141176 0.447059 0.647059 0.905882 0.317647 0.329412 0.352941 0.178571 0.214286 0.214286 0.011765 0.235294 0.529412 0.776471 0.952941 0.023529 0.176471 0.329412 0.682353 1.000000 0.082353 0.400000 0.517647 0.729412 0.988235 0.364706 0.411765 0.223529 0.285714 0.178571 0.190476 0.023529 0.176471 0.364706 0.752941 1.000000 0.058824 0.305882 0.541176 0.776471 0.988235 0.011765 0.141176 0.447059 0.647059 0.905882 0.000000 0.094118 0.082353 0.047059 0.070588 0.035294 0.070588 0.070588 0.105882 0.070588 0.011765 0.023529 0.058824 0.000000 0.058824 0.105882 0.047059 0.011765 0.035294 0.000000 
>YBR085w
0.270358 0.390879 0.338762 0.192810 0.169935 0.258170 0.013029 0.175896 0.358306 0.664495 1.000000 0.006515 0.286645 0.508143 0.745928 0.986971 0.003257 0.273616 0.579805 0.771987 0.996743 0.276873 0.000000 0.723127 0.000000 0.111111 0.000000 0.003257 0.185668 0.504886 0.700326 1.000000 0 0 0 0 0 0.039088 0.270358 0.485342 0.745928 0.986971 0.755700 0.163399 0.039088 0.280130 0.530945 0.752443 0.983713 0.413681 0.302932 0.283388 0.245098 0.186275 0.153595 0.006515 0.260586 0.504886 0.749186 0.986971 0.022801 0.192182 0.446254 0.732899 0.980456 0.003257 0.276873 0.485342 0.729642 1.000000 0.374593 0.355049 0.270358 0.251634 0.196078 0.166667 0.003257 0.280130 0.579805 0.765472 0.996743 0.006515 0.263844 0.501629 0.742671 0.986971 0.013029 0.175896 0.358306 0.664495 1.000000 0.384365 0.332248 0.283388 0.261438 0.169935 0.169935 0.006515 0.260586 0.501629 0.742671 0.986971 0.022801 0.195440 0.514658 0.758958 0.980456 0.003257 0.276873 0.485342 0.729642 1.000000 0.042345 0.091205 0.022801 0.045603 0.035831 0.032573 0.114007 0.097720 0.078176 0.048860 0.016287 0.000000 0.035831 0.013029 0.061889 0.094463 0.055375 0.035831 0.068404 0.009772 
>YBR086c
0.292812 0.395349 0.311839 0.235979 0.149206 0.235979 0.003171 0.258985 0.564482 0.812896 0.998943 0.002114 0.289641 0.576110 0.784355 0.993658 0.001057 0.221987 0.387949 0.584567 1.000000 0.489429 0.080338 0.430233 0.031746 0.074074 0.002116 0.001057 0.355180 0.684989 0.827696 1.000000 0.004228 0.040169 0.603594 0.848837 0.963002 0.049683 0.198732 0.384778 0.543340 0.997886 0.533827 0.268783 0.005285 0.223044 0.384778 0.580338 0.995772 0.380550 0.372093 0.247357 0.274074 0.180952 0.190476 0.002114 0.299154 0.580338 0.800211 0.990486 0.003171 0.241015 0.469345 0.679704 1.000000 0.001057 0.211416 0.441860 0.680761 0.998943 0.346723 0.331924 0.321353 0.215873 0.182011 0.211640 0.001057 0.207188 0.385835 0.571882 1.000000 0.002114 0.306554 0.594080 0.798097 0.990486 0.003171 0.290698 0.588795 0.823467 0.998943 0.321353 0.431290 0.247357 0.255026 0.149206 0.222222 0.002114 0.313953 0.618393 0.810782 0.990486 0.003171 0.243129 0.472516 0.681818 1.000000 0.001057 0.211416 0.441860 0.680761 0.998943 0.017970 0.085624 0.045455 0.040169 0.034884 0.068710 0.032770 0.066596 0.114165 0.067653 0.050740 0.028541 0.034884 0.008457 0.060254 0.090909 0.071882 0.010571 0.058140 0.011628 
>YBR087w
0.327684 0.305085 0.367232 0.209632 0.240793 0.203966 0.016949 0.242938 0.449153 0.703390 1.000000 0.005650 0.217514 0.488701 0.714689 0.980226 0.002825 0.271186 0.536723 0.788136 0.997175 0.367232 0.076271 0.556497 0.028329 0.107649 0.005666 0.002825 0.194915 0.358757 0.548023 1.000000 0.107345 0.237288 0.384181 0.471751 0.531073 0.011299 0.330508 0.655367 0.836158 0.994350 0.570621 0.419263 0.011299 0.262712 0.511299 0.762712 0.994350 0.341808 0.432203 0.225989 0.286119 0.175637 0.189802 0.005650 0.251412 0.497175 0.714689 1.000000 0.008475 0.271186 0.531073 0.762712 0.997175 0.002825 0.194915 0.446328 0.745763 0.988701 0.389831 0.262712 0.347458 0.189802 0.283286 0.189802 0.002825 0.259887 0.528249 0.788136 0.997175 0.005650 0.220339 0.497175 0.709040 0.980226 0.016949 0.237288 0.440678 0.723164 1.000000 0.276836 0.497175 0.225989 0.291785 0.135977 0.229462 0.005650 0.251412 0.494350 0.711864 1.000000 0.008475 0.268362 0.528249 0.762712 0.997175 0.002825 0.194915 0.446328 0.745763 0.988701 0.056497 0.070621 0.062147 0.053672 0.025424 0.059322 0.028249 0.056497 0.096045 0.042373 0.039548 0.019774 0.022599 0.025424 0.059322 0.135593 0.090395 0.028249 0.022599 0.005650 
>YBR088c
0.337209 0.290698 0.372093 0.210117 0.299611 0.210117 0.011628 0.213178 0.465116 0.732558 1.000000 0.015504 0.286822 0.542636 0.751938 0.976744 0.003876 0.209302 0.484496 0.728682 0.984496 0.372093 0.441860 0.186047 0.140078 0.031128 0.015564 0.003876 0.310078 0.484496 0.728682 1.000000 0.007752 0.228682 0.523256 0.759690 0.968992 0.034884 0.209302 0.554264 0.748062 0.852713 0.534884 0.463035 0.007752 0.193798 0.519380 0.806202 1.000000 0.387597 0.399225 0.213178 0.319066 0.147860 0.198444 0.015504 0.282946 0.523256 0.748062 0.992248 0.007752 0.201550 0.468992 0.720930 1.000000 0.003876 0.232558 0.492248 0.771318 0.984496 0.387597 0.267442 0.344961 0.210117 0.322957 0.186770 0.003876 0.220930 0.484496 0.728682 0.984496 0.015504 0.294574 0.546512 0.751938 0.976744 0.011628 0.224806 0.465116 0.732558 1.000000 0.341085 0.445736 0.213178 0.326848 0.116732 0.229572 0.015504 0.286822 0.523256 0.748062 0.992248 0.007752 0.209302 0.468992 0.732558 1.000000 0.003876 0.232558 0.492248 0.771318 0.984496 0.031008 0.069767 0.073643 0.104651 0.034884 0.023256 0.046512 0.050388 0.093023 0.046512 0.031008 0.007752 0.015504 0.015504 0.050388 0.124031 0.093023 0.023256 0.065891 0.000000 
>YBR089c-a
0.494949 0.353535 0.151515 0.397959 0.091837 0.122449 0.050505 0.212121 0.464646 0.747475 0.989899 0.020202 0.181818 0.505051 0.767677 1.000000 0.010101 0.353535 0.454545 0.606061 0.939394 0.444444 0.000000 0.555556 0.000000 0.081633 0.000000 0.010101 0.111111 0.222222 0.494949 1.000000 0 0 0 0 0 0.333333 0.454545 0.646465 0.828283 0.969697 0.282828 0.346939 0.070707 0.363636 0.494949 0.656566 0.949495 0.353535 0.292929 0.353535 0.265306 0.234694 0.163265 0.020202 0.181818 0.474747 0.707071 1.000000 0.060606 0.404040 0.565657 0.727273 0.959596 0.010101 0.191919 0.363636 0.737374 0.989899 0.191919 0.313131 0.494949 0.122449 0.132653 0.357143 0.010101 0.353535 0.525253 0.656566 0.949495 0.020202 0.171717 0.474747 0.707071 1.000000 0.050505 0.212121 0.464646 0.747475 0.989899 0.292929 0.353535 0.353535 0.244898 0.193878 0.204082 0.020202 0.232323 0.515152 0.707071 1.000000 0.060606 0.272727 0.505051 0.727273 0.959596 0.010101 0.191919 0.363636 0.737374 0.989899 0.111111 0.141414 0.111111 0.040404 0.040404 0.050505 0.030303 0.121212 0.040404 0.060606 0.060606 0.000000 0.040404 0.000000 0.030303 0.040404 0.020202 0.020202 0.030303 0.010101 
>YBR091c
0.357798 0.311927 0.330275 0.231481 0.222222 0.212963 0.055046 0.183486 0.522936 0.816514 1.000000 0.018349 0.284404 0.513761 0.761468 0.981651 0.009174 0.220183 0.403670 0.642202 0.944954 0.321101 0.000000 0.678899 0.000000 0.074074 0.000000 0.009174 0.119266 0.458716 0.541284 1.000000 0 0 0 0 0 0.027523 0.256881 0.587156 0.752294 0.963303 0.440367 0.407407 0.027523 0.256881 0.504587 0.669725 0.944954 0.376147 0.357798 0.266055 0.277778 0.240741 0.129630 0.018349 0.275229 0.486239 0.715596 0.981651 0.045872 0.155963 0.385321 0.697248 0.944954 0.009174 0.266055 0.633028 0.788991 1.000000 0.348624 0.266055 0.385321 0.222222 0.250000 0.222222 0.009174 0.220183 0.412844 0.660550 0.944954 0.018349 0.256881 0.467890 0.724771 0.981651 0.055046 0.229358 0.541284 0.816514 1.000000 0.293578 0.440367 0.266055 0.240741 0.203704 0.166667 0.018349 0.247706 0.495413 0.761468 0.981651 0.045872 0.220183 0.422018 0.678899 0.944954 0.009174 0.266055 0.633028 0.788991 1.000000 0.055046 0.064220 0.073394 0.055046 0.055046 0.055046 0.082569 0.045872 0.073394 0.036697 0.027523 0.027523 0.018349 0.055046 0.055046 0.073394 0.045872 0.027523 0.073394 0.000000 
>YBR092c
0.319058 0.389722 0.291221 0.233906 0.193133 0.233906 0.006424 0.269807 0.507495 0.728051 1.000000 0.008565 0.209850 0.458244 0.743041 0.991435 0.002141 0.233405 0.533191 0.764454 0.995717 0.552463 0.094218 0.353319 0.036481 0.070815 0.002146 0.002141 0.226981 0.443255 0.768737 1.000000 0.077088 0.158458 0.800857 0.847966 0.972163 0.004283 0.321199 0.516060 0.638116 0.993576 0.571734 0.399142 0.004283 0.237687 0.503212 0.725910 0.993576 0.419700 0.329764 0.250535 0.298283 0.199571 0.171674 0.008565 0.254818 0.475375 0.740899 0.991435 0.010707 0.265525 0.526767 0.751606 1.000000 0.002141 0.218415 0.492505 0.758030 0.997859 0.355460 0.312634 0.331906 0.240343 0.242489 0.188841 0.002141 0.233405 0.537473 0.773019 0.995717 0.008565 0.194861 0.449679 0.725910 0.991435 0.006424 0.269807 0.507495 0.734475 1.000000 0.372591 0.376874 0.250535 0.296137 0.180258 0.190987 0.008565 0.256959 0.475375 0.723769 0.991435 0.010707 0.263383 0.526767 0.764454 1.000000 0.002141 0.218415 0.492505 0.758030 0.997859 0.032120 0.044968 0.053533 0.089936 0.034261 0.064240 0.066381 0.074946 0.064240 0.077088 0.029979 0.012848 0.064240 0.017131 0.053533 0.083512 0.040685 0.021413 0.059957 0.014989 
>YBR093c
0.314775 0.398287 0.286938 0.231760 0.195279 0.231760 0.006424 0.261242 0.490364 0.728051 1.000000 0.008565 0.211991 0.475375 0.745182 0.991435 0.002141 0.233405 0.533191 0.751606 0.995717 0.556745 0.094218 0.349036 0.032189 0.070815 0.002146 0.002141 0.231263 0.449679 0.773019 1.000000 0.139186 0.355460 0.715203 0.843683 0.972163 0.004283 0.314775 0.516060 0.635974 0.995717 0.541756 0.394850 0.004283 0.246253 0.516060 0.728051 0.993576 0.421842 0.325482 0.252677 0.293991 0.203863 0.171674 0.008565 0.239829 0.468951 0.740899 0.991435 0.010707 0.269807 0.524625 0.751606 1.000000 0.002141 0.218415 0.513919 0.758030 0.997859 0.353319 0.312634 0.334047 0.236052 0.251073 0.188841 0.002141 0.241970 0.533191 0.764454 0.995717 0.008565 0.194861 0.451820 0.743041 0.991435 0.006424 0.269807 0.505353 0.728051 1.000000 0.372591 0.374732 0.252677 0.293991 0.182403 0.193133 0.008565 0.254818 0.473233 0.725910 0.991435 0.010707 0.263383 0.520343 0.762313 1.000000 0.002141 0.218415 0.513919 0.758030 0.997859 0.029979 0.049251 0.047109 0.087794 0.034261 0.066381 0.059957 0.066381 0.079229 0.079229 0.027837 0.019272 0.066381 0.021413 0.057816 0.074946 0.044968 0.014989 0.057816 0.014989 
>YBR094w
0.359894 0.320053 0.320053 0.226064 0.236702 0.218085 0.002656 0.310757 0.571049 0.771580 0.997344 0.007968 0.200531 0.410359 0.685259 0.998672 0.001328 0.244356 0.491368 0.755644 1.000000 0.560425 0.193891 0.245684 0.090426 0.050532 0.005319 0.001328 0.274900 0.464807 0.718459 1.000000 0.002656 0.193891 0.512616 0.756972 0.992032 0.023904 0.249668 0.555113 0.837981 0.986720 0.594954 0.353723 0.003984 0.211155 0.459495 0.743692 0.994688 0.349270 0.401062 0.249668 0.289894 0.178191 0.199468 0.007968 0.209827 0.466135 0.741036 0.998672 0.003984 0.264276 0.501992 0.754316 0.997344 0.001328 0.269588 0.513944 0.746348 1.000000 0.361222 0.256308 0.382470 0.195479 0.285904 0.206117 0.001328 0.256308 0.503320 0.755644 1.000000 0.007968 0.196547 0.395750 0.683931 0.998672 0.002656 0.310757 0.553785 0.763612 0.997344 0.289509 0.460823 0.249668 0.261968 0.144947 0.232713 0.007968 0.217795 0.484728 0.729084 0.998672 0.003984 0.247012 0.488712 0.756972 0.997344 0.001328 0.269588 0.513944 0.746348 1.000000 0.027888 0.073041 0.074369 0.082337 0.026560 0.075697 0.038513 0.049137 0.069057 0.050465 0.049137 0.022576 0.041169 0.010624 0.059761 0.090305 0.074369 0.018592 0.049137 0.017264 
>YBR095c
0.413953 0.304651 0.281395 0.242424 0.214452 0.184149 0.009302 0.255814 0.513953 0.774419 0.997674 0.004651 0.223256 0.518605 0.720930 1.000000 0.002326 0.246512 0.465116 0.727907 0.972093 0.518605 0.069767 0.411628 0.044289 0.090909 0.002331 0.002326 0.269767 0.511628 0.658140 1.000000 0.009302 0.120930 0.213953 0.483721 0.923256 0.030233 0.327907 0.653488 0.802326 0.993023 0.437209 0.438228 0.006977 0.272093 0.483721 0.762791 0.972093 0.334884 0.472093 0.193023 0.300699 0.121212 0.188811 0.004651 0.272093 0.523256 0.730233 1.000000 0.006977 0.279070 0.504651 0.755814 0.995349 0.002326 0.181395 0.430233 0.772093 0.997674 0.302326 0.272093 0.425581 0.181818 0.235431 0.212121 0.002326 0.244186 0.465116 0.706977 0.972093 0.004651 0.223256 0.532558 0.725581 1.000000 0.009302 0.255814 0.513953 0.772093 0.997674 0.300000 0.506977 0.193023 0.282051 0.107226 0.202797 0.004651 0.251163 0.513953 0.732558 1.000000 0.006977 0.281395 0.518605 0.751163 0.995349 0.002326 0.181395 0.430233 0.772093 0.997674 0.062791 0.053488 0.104651 0.062791 0.034884 0.095349 0.044186 0.041860 0.097674 0.053488 0.034884 0.011628 0.020930 0.000000 0.048837 0.097674 0.090698 0.016279 0.025581 0.002326 
>YBR096w
0.291304 0.343478 0.365217 0.183406 0.209607 0.279476 0.034783 0.326087 0.565217 0.800000 0.995652 0.008696 0.195652 0.408696 0.717391 0.991304 0.004348 0.186957 0.469565 0.708696 1.000000 0.360870 0.221739 0.417391 0.056769 0.091703 0.021834 0.004348 0.239130 0.560870 0.826087 1.000000 0.269565 0.521739 0.608696 0.678261 0.900000 0.017391 0.130435 0.386957 0.734783 0.986957 0.730435 0.270742 0.017391 0.208696 0.430435 0.669565 0.986957 0.317391 0.347826 0.334783 0.231441 0.222707 0.235808 0.008696 0.273913 0.478261 0.734783 0.991304 0.013043 0.247826 0.547826 0.830435 1.000000 0.004348 0.200000 0.447826 0.660870 0.982609 0.447826 0.247826 0.304348 0.262009 0.253275 0.139738 0.004348 0.173913 0.460870 0.704348 1.000000 0.008696 0.208696 0.417391 0.717391 0.991304 0.034783 0.334783 0.565217 0.800000 0.995652 0.243478 0.421739 0.334783 0.227074 0.157205 0.301310 0.008696 0.273913 0.417391 0.734783 0.991304 0.013043 0.252174 0.539130 0.813043 1.000000 0.004348 0.200000 0.447826 0.660870 0.982609 0.030435 0.095652 0.069565 0.030435 0.017391 0.047826 0.039130 0.034783 0.082609 0.056522 0.034783 0.013043 0.082609 0.039130 0.047826 0.104348 0.060870 0.021739 0.078261 0.013043 
>YBR097w
0.323934 0.312930 0.363136 0.196146 0.243634 0.219546 0.002751 0.235901 0.489684 0.720083 1.000000 0.001376 0.255846 0.537139 0.755846 0.997937 0.000688 0.250344 0.480743 0.765475 0.999312 0.490371 0.185695 0.323934 0.064694 0.053682 0.005506 0.000688 0.222146 0.578404 0.751032 1.000000 0.019257 0.552270 0.779917 0.868638 0.999312 0.014443 0.237276 0.372765 0.488996 0.984182 0.563274 0.362010 0.003439 0.261348 0.490371 0.788858 0.999312 0.330812 0.430536 0.238652 0.280110 0.163111 0.207846 0.001376 0.255158 0.533012 0.770977 0.997937 0.002751 0.264099 0.486245 0.744842 1.000000 0.000688 0.209078 0.490371 0.712517 0.999312 0.400275 0.257909 0.341816 0.198899 0.284928 0.174123 0.000688 0.244154 0.474553 0.753783 0.999312 0.001376 0.269601 0.557084 0.770289 0.997937 0.002751 0.238652 0.492435 0.722146 1.000000 0.274415 0.486933 0.238652 0.263593 0.136958 0.233999 0.001376 0.256534 0.544017 0.773040 0.997937 0.002751 0.259285 0.488996 0.748281 1.000000 0.000688 0.209078 0.490371 0.712517 0.999312 0.041953 0.062586 0.058459 0.052957 0.035076 0.072902 0.033700 0.033012 0.096286 0.058459 0.036451 0.017882 0.037139 0.019945 0.061210 0.107978 0.094911 0.016506 0.055021 0.007565 
>YBR098w
0.406657 0.325615 0.267728 0.281159 0.230435 0.176812 0.004342 0.243126 0.506512 0.748191 1.000000 0.002894 0.256151 0.451520 0.716353 0.997106 0.001447 0.238784 0.567294 0.768452 0.998553 0.507959 0.107091 0.384949 0.044928 0.091304 0.007246 0.001447 0.192475 0.364689 0.654124 1.000000 0.005789 0.108538 0.409551 0.680174 0.929088 0.057887 0.473227 0.630970 0.811867 0.985528 0.397974 0.420290 0.005789 0.279305 0.573082 0.749638 0.988423 0.357453 0.387844 0.254703 0.273913 0.169565 0.179710 0.002894 0.212735 0.422576 0.661360 0.997106 0.004342 0.235890 0.513748 0.751085 1.000000 0.001447 0.350217 0.593343 0.795948 0.985528 0.299566 0.274964 0.425470 0.157971 0.272464 0.244928 0.001447 0.261939 0.578871 0.768452 0.998553 0.002894 0.234443 0.428365 0.684515 0.997106 0.004342 0.246020 0.509407 0.752533 1.000000 0.306802 0.438495 0.254703 0.286957 0.144928 0.204348 0.002894 0.193922 0.421129 0.662808 0.997106 0.004342 0.238784 0.506512 0.748191 1.000000 0.001447 0.350217 0.593343 0.795948 0.985528 0.047757 0.096961 0.072359 0.072359 0.049204 0.068017 0.034732 0.050651 0.107091 0.041968 0.040521 0.018813 0.031838 0.010130 0.044863 0.083936 0.069465 0.017366 0.037627 0.004342 
>YBR101c
0.379310 0.279310 0.341379 0.214533 0.276817 0.193772 0.006897 0.255172 0.472414 0.751724 0.989655 0.027586 0.189655 0.500000 0.706897 0.993103 0.003448 0.248276 0.510345 0.748276 1.000000 0.344828 0.048276 0.606897 0.020761 0.103806 0.006920 0.003448 0.182759 0.558621 0.786207 1.000000 0.024138 0.765517 0.779310 0.979310 0.993103 0.006897 0.258621 0.455172 0.662069 0.951724 0.496552 0.463668 0.013793 0.282759 0.510345 0.693103 0.986207 0.331034 0.455172 0.213793 0.307958 0.141869 0.166090 0.027586 0.189655 0.482759 0.696552 0.982759 0.006897 0.268966 0.472414 0.772414 1.000000 0.003448 0.237931 0.531034 0.751724 0.993103 0.362069 0.244828 0.393103 0.179931 0.304498 0.186851 0.003448 0.262069 0.531034 0.765517 1.000000 0.027586 0.148276 0.462069 0.682759 0.982759 0.006897 0.258621 0.489655 0.758621 0.989655 0.289655 0.496552 0.213793 0.294118 0.128028 0.179931 0.027586 0.210345 0.482759 0.706897 0.982759 0.006897 0.258621 0.472414 0.768966 1.000000 0.003448 0.237931 0.531034 0.751724 0.993103 0.031034 0.082759 0.075862 0.079310 0.031034 0.079310 0.041379 0.068966 0.068966 0.031034 0.034483 0.013793 0.020690 0.006897 0.048276 0.144828 0.075862 0.027586 0.031034 0.006897 
>YBR102c
0.402390 0.304117 0.293493 0.204787 0.267287 0.162234 0.003984 0.285525 0.511288 0.747676 1.000000 0.006640 0.164675 0.403718 0.685259 0.994688 0.001328 0.320053 0.541833 0.795485 0.998672 0.444887 0.046481 0.508632 0.021277 0.074468 0.005319 0.001328 0.150066 0.374502 0.634794 1.000000 0.003984 0.458167 0.499336 0.533865 0.915007 0.007968 0.339973 0.617530 0.831341 0.990704 0.414343 0.401596 0.005312 0.309429 0.528552 0.816733 0.989376 0.351926 0.415671 0.232404 0.289894 0.154255 0.194149 0.006640 0.188579 0.456839 0.702523 0.996016 0.002656 0.310757 0.520584 0.774236 0.998672 0.001328 0.232404 0.492696 0.709163 1.000000 0.309429 0.273572 0.416999 0.151596 0.293883 0.191489 0.001328 0.313413 0.535193 0.790173 0.998672 0.006640 0.167331 0.414343 0.689243 0.994688 0.003984 0.277556 0.509960 0.745020 1.000000 0.302789 0.464807 0.232404 0.300532 0.135638 0.212766 0.006640 0.208499 0.479416 0.735724 0.996016 0.002656 0.289509 0.501992 0.766268 0.998672 0.001328 0.232404 0.492696 0.709163 1.000000 0.057105 0.077025 0.061089 0.070385 0.049137 0.087649 0.029216 0.045153 0.107570 0.050465 0.041169 0.014608 0.015936 0.007968 0.047809 0.110226 0.059761 0.026560 0.035857 0.005312 
>YBR103w
[truncated: 6,814,237 more chars]
