# Supplementary material for: Prediction of Substrate-Enzyme-Product Interaction Based on Molecular Descriptors and Physicochemical Properties
Source: Biomed Res Int. 2013 Dec 22;2013:674215. doi: 10.1155/2013/674215 (PMC3881445; doi:10.1155/2013/674215)
Supplement: Supplementary file 1 — Supplementary Material 1： The ID of 1326 compounds and 939 enzymes of metabolic pathway in Kegg database. Supplementary Material 2：14,592 networking triads of substrate-enzyme-product. Supplementary Material 3: 729,600 non-networking triads of substrate-enzyme-product. Supplementary Material 4: Calculated value of molecular descriptors of 1326 compounds and the categories. Supplementary Material 5: The value of 132 physicochemical descriptors for 939 enzyme. Supplementary Material 6: The MaxRel and mRMR feature tables using mRMR method. [file 674215.f1.zip › 674215.f1/supplemental material VI.txt]

The MaxRel and mRMR feature tables using mRMR method
*** MaxRel features ***
Order	Fea	Name	Score
1	152	enzyme_73	0.008
2	153	enzyme_74	0.005
3	81	enzyme_2	0.005
4	151	enzyme_72	0.005
5	27	Substrate_Polarizability	0.005
6	126	enzyme_47	0.004
7	28	Substrate_Refractivity	0.004
8	127	enzyme_48	0.004
9	16	Substrate_Volume	0.004
10	115	enzyme_36	0.004
11	136	enzyme_57	0.004
12	150	enzyme_71	0.004
13	122	enzyme_43	0.003
14	107	enzyme_28	0.003
15	24	Substrate_LogP	0.003
16	4	Substrate_CComposition	0.003
17	159	enzyme_80	0.003
18	198	enzyme_119	0.003
19	162	enzyme_83	0.003
20	88	enzyme_9	0.003
21	31	Substrate_BondCount	0.003
22	18	Substrate_MinZ	0.003
23	1	Substrate_AllAtomCount	0.003
24	83	enzyme_4	0.003
25	125	enzyme_46	0.003
26	154	enzyme_75	0.003
27	84	enzyme_5	0.003
28	73	Substrate_SurfaceArea	0.003
29	75	Substrate_WaterAccessibleSurfaceArea	0.003
30	99	enzyme_20	0.003
31	12	Substrate_MaximalProjectionArea	0.003
32	196	enzyme_117	0.003
33	82	enzyme_3	0.003
34	6	Substrate_OComposition	0.002
35	129	enzyme_50	0.002
36	113	enzyme_34	0.002
37	201	enzyme_122	0.002
38	80	enzyme_1	0.002
39	108	enzyme_29	0.002
40	85	enzyme_6	0.002
41	78	Substrate_WaterAccessibleSurfaceAreaPlus	0.002
42	48	Substrate_FusedRingCount	0.002
43	13	Substrate_MaximalProjectionRadius	0.002
44	215	Product_CComposition	0.002
45	41	Substrate_AliphaticBondCount	0.002
46	44	Substrate_CarboRingCount	0.002
47	14	Substrate_MinimalProjectionArea	0.002
48	53	Substrate_PlattIndex	0.002
49	3	Substrate_ExactMass	0.002
50	2	Substrate_Mass	0.002
51	195	enzyme_116	0.002
52	96	enzyme_17	0.002
53	187	enzyme_108	0.002
54	156	enzyme_77	0.002
55	145	enzyme_66	0.002
56	23	Substrate_LogD	0.002
57	65	Substrate_LargestRingSystemSize	0.002
58	49	Substrate_FusedAliphaticRingCount	0.002
59	66	Substrate_RingSystemCount	0.002
60	155	enzyme_76	0.002
61	183	enzyme_104	0.002
62	116	enzyme_37	0.002
63	33	Substrate_RingCount	0.002
64	32	Substrate_CyclomaticNumber	0.002
65	203	enzyme_124	0.002
66	76	Substrate_WaterAccessibleSurfaceAreaHydrophobic	0.002
67	206	enzyme_127	0.002
68	178	enzyme_99	0.002
69	184	enzyme_105	0.002
70	69	Substrate_WienerPolarity	0.002
71	209	enzyme_130	0.002
72	92	enzyme_13	0.002
73	114	enzyme_35	0.002
74	38	Substrate_AliphaticRingCount	0.002
75	68	Substrate_StereoDoubleBondCount	0.002
76	135	enzyme_56	0.002
77	54	Substrate_RandicIndex	0.002
78	67	Substrate_SmallestRingSystemSize	0.002
79	52	Substrate_SmallestRingSize	0.002
80	61	Substrate_RotatableBondCount	0.002
81	188	enzyme_109	0.002
82	146	enzyme_67	0.002
83	132	enzyme_53	0.002
84	5	Substrate_HComposition	0.001
85	35	Substrate_RingBondCount	0.001
86	34	Substrate_RingAtomCount	0.001
87	202	enzyme_123	0.001
88	147	enzyme_68	0.001
89	189	enzyme_110	0.001
90	208	enzyme_129	0.001
91	235	Product_LogP	0.001
92	36	Substrate_ChainAtomCount	0.001
93	11	Substrate_DreidingEnergy	0.001
94	204	enzyme_125	0.001
95	51	Substrate_LargestRingSize	0.001
96	62	Substrate_CarboAliphaticRingCount	0.001
97	217	Product_OComposition	0.001
98	37	Substrate_ChainBondCount	0.001
99	182	enzyme_103	0.001
100	140	enzyme_61	0.001
101	168	enzyme_89	0.001
102	157	enzyme_78	0.001
103	197	enzyme_118	0.001
104	98	enzyme_19	0.001
105	144	enzyme_65	0.001
106	40	Substrate_AliphaticAtomCount	0.001
107	130	enzyme_51	0.001
108	186	enzyme_107	0.001
109	288	Product_WaterAccessibleSurfaceAreaPolar	0.001
110	281	Product_PolarSurfaceArea	0.001
111	194	enzyme_115	0.001
112	185	enzyme_106	0.001
113	103	enzyme_24	0.001
114	278	Product_SmallestRingSystemSize	0.001
115	123	enzyme_44	0.001
116	143	enzyme_64	0.001
117	77	Substrate_WaterAccessibleSurfaceAreaPolar	0.001
118	233	Product_DonorSiteCount	0.001
119	205	enzyme_126	0.001
120	193	enzyme_114	0.001
121	124	enzyme_45	0.001
122	119	enzyme_40	0.001
123	176	enzyme_97	0.001
124	134	enzyme_55	0.001
125	171	enzyme_92	0.001
126	102	enzyme_23	0.001
127	234	Product_LogD	0.001
128	231	Product_DonorCount	0.001
129	93	enzyme_14	0.001
130	137	enzyme_58	0.001
131	219	Product_PComposition	0.001
132	169	enzyme_90	0.001
133	232	Product_AcceptorSiteCount	0.001
134	128	enzyme_49	0.001
135	230	Product_AcceptorCount	0.001
136	104	enzyme_25	0.001
137	276	Product_LargestRingSystemSize	0.001
138	21	Substrate_AcceptorSiteCount	0.001
139	47	Substrate_CarboAromaticRingCount	0.001
140	8	Substrate_PComposition	0.001
141	175	enzyme_96	0.001
142	89	enzyme_10	0.001
143	216	Product_HComposition	0.001
144	133	enzyme_54	0.001
145	210	enzyme_131	0.001
146	101	enzyme_22	0.001
147	109	enzyme_30	0.001
148	259	Product_FusedRingCount	0.001
149	266	Product_BalabanIndex	0.001
150	117	enzyme_38	0.001
151	120	enzyme_41	0.001
152	190	enzyme_111	0.001
153	148	enzyme_69	0.001
154	7	Substrate_NComposition	0.001
155	251	Product_AliphaticAtomCount	0.001
156	59	Substrate_WienerIndex	0.001
157	236	Product_MicrospeciesCount	0.001
158	17	Substrate_MaxZ	0.001
159	87	enzyme_8	0.001
160	15	Substrate_MinimalProjectionRadius	0.001
161	63	Substrate_ChiralCenterCount	0.001
162	60	Substrate_AsymmetricAtomCount	0.001
163	56	Substrate_HararyIndex	0.001
164	166	enzyme_87	0.001
165	46	Substrate_HeteroAromaticRingCount	0.001
166	121	enzyme_42	0.000
167	170	enzyme_91	0.000
168	255	Product_CarboRingCount	0.000
169	260	Product_FusedAliphaticRingCount	0.000
170	100	enzyme_21	0.000
171	273	Product_CarboAliphaticRingCount	0.000
172	200	enzyme_121	0.000
173	90	enzyme_11	0.000
174	45	Substrate_HeteroRingCount	0.000
175	279	Product_StereoDoubleBondCount	0.000
176	247	Product_ChainAtomCount	0.000
177	199	enzyme_120	0.000
178	180	enzyme_101	0.000
179	142	enzyme_63	0.000
180	58	Substrate_SzegedIndex	0.000
181	192	enzyme_113	0.000
182	261	Product_FusedAromaticRingCount	0.000
183	105	enzyme_26	0.000
184	91	enzyme_12	0.000
185	248	Product_ChainBondCount	0.000
186	138	enzyme_59	0.000
187	163	enzyme_84	0.000
188	30	Substrate_TautomerCount	0.000
189	97	enzyme_18	0.000
190	252	Product_AliphaticBondCount	0.000
191	277	Product_RingSystemCount	0.000
192	172	enzyme_93	0.000
193	290	Product_WaterAccessibleSurfaceAreaNegative	0.000
194	9	Substrate_SComposition	0.000
195	207	enzyme_128	0.000
196	50	Substrate_FusedAromaticRingCount	0.000
197	211	enzyme_132	0.000
198	71	Substrate_FormalCharge	0.000
199	118	enzyme_39	0.000
200	55	Substrate_BalabanIndex	0.000
201	111	enzyme_32	0.000
202	70	Substrate_PolarSurfaceArea	0.000
203	158	enzyme_79	0.000
204	86	enzyme_7	0.000
205	160	enzyme_81	0.000
206	57	Substrate_HyperWienerIndex	0.000
207	131	enzyme_52	0.000
208	173	enzyme_94	0.000
209	149	enzyme_70	0.000
210	191	enzyme_112	0.000
211	229	Product_MinZ	0.000
212	10	Substrate_XComposition	0.000
213	282	Product_FormalCharge	0.000
214	250	Product_AromaticRingCount	0.000
215	253	Product_AromaticAtomCount	0.000
216	254	Product_AromaticBondCount	0.000
217	164	enzyme_85	0.000
218	241	Product_TautomerCount	0.000
219	287	Product_WaterAccessibleSurfaceAreaHydrophobic	0.000
220	22	Substrate_DonorSiteCount	0.000
221	243	Product_CyclomaticNumber	0.000
222	244	Product_RingCount	0.000
223	275	Product_HeteroAliphaticRingCount	0.000
224	265	Product_RandicIndex	0.000
225	226	Product_MinimalProjectionRadius	0.000
226	212	Product_AllAtomCount	0.000
227	221	Product_XComposition	0.000
228	223	Product_MaximalProjectionArea	0.000
229	79	Substrate_WaterAccessibleSurfaceAreaNegative	0.000
230	227	Product_Volume	0.000
231	237	Product_MicrospeciesCount	0.000
232	20	Substrate_DonorCount	0.000
233	249	Product_AliphaticRingCount	0.000
234	225	Product_MinimalProjectionArea	0.000
235	257	Product_HeteroAromaticRingCount	0.000
236	110	enzyme_31	0.000
237	64	Substrate_HeteroAliphaticRingCount	0.000
238	218	Product_NComposition	0.000
239	179	enzyme_100	0.000
240	286	Product_WaterAccessibleSurfaceArea	0.000
241	284	Product_SurfaceArea	0.000
242	289	Product_WaterAccessibleSurfaceAreaPlus	0.000
243	141	enzyme_62	0.000
244	258	Product_CarboAromaticRingCount	0.000
245	19	Substrate_AcceptorCount	0.000
246	263	Product_SmallestRingSize	0.000
247	220	Product_SComposition	0.000
248	165	enzyme_86	0.000
249	269	Product_SzegedIndex	0.000
250	161	enzyme_82	0.000
251	245	Product_RingAtomCount	0.000
252	267	Product_HararyIndex	0.000
253	262	Product_LargestRingSize	0.000
254	240	Product_ResonantCount	0.000
255	174	enzyme_95	0.000
256	224	Product_MaximalProjectionRadius	0.000
257	280	Product_WienerPolarity	0.000
258	246	Product_RingBondCount	0.000
259	272	Product_RotatableBondCount	0.000
260	264	Product_PlattIndex	0.000
261	242	Product_BondCount	0.000
262	214	Product_ExactMass	0.000
263	213	Product_Mass	0.000
264	26	Substrate_MicrospeciesCount	0.000
265	181	enzyme_102	0.000
266	106	enzyme_27	0.000
267	271	Product_AsymmetricAtomCount	0.000
268	274	Product_ChiralCenterCount	0.000
269	167	enzyme_88	0.000
270	239	Product_Refractivity	0.000
271	177	enzyme_98	0.000
272	94	enzyme_15	0.000
273	25	Substrate_MicrospeciesCount	0.000
274	139	enzyme_60	0.000
275	42	Substrate_AromaticAtomCount	0.000
276	43	Substrate_AromaticBondCount	0.000
277	39	Substrate_AromaticRingCount	0.000
278	95	enzyme_16	0.000
279	29	Substrate_ResonantCount	0.000
280	256	Product_HeteroRingCount	0.000
281	268	Product_HyperWienerIndex	0.000
282	112	enzyme_33	0.000
283	228	Product_MaxZ	0.000
284	270	Product_WienerIndex	0.000
285	238	Product_Polarizability	0.000
286	222	Product_DreidingEnergy	0.000
287	285	Product_VanDerWaalsSurfaceArea	0.000
288	72	Substrate_HMOTotalPiEnergy	0.000
289	283	Product_HMOTotalPiEnergy	0.000
*** mRMR features ***
Order	Fea	Name	Score
1	152	enzyme_73	0.008
2	27	Substrate_Polarizability	0.004
3	215	Product_CComposition	0.001
4	186	enzyme_107	0.000
5	285	Product_VanDerWaalsSurfaceArea	-0.000
6	111	enzyme_32	0.000
7	136	enzyme_57	0.000
8	72	Substrate_HMOTotalPiEnergy	-0.000
9	115	enzyme_36	0.000
10	283	Product_HMOTotalPiEnergy	-0.000
11	47	Substrate_CarboAromaticRingCount	0.000
12	74	Substrate_VanDerWaalsSurfaceArea	-0.000
13	261	Product_FusedAromaticRingCount	-0.000
14	203	enzyme_124	-0.000
15	49	Substrate_FusedAliphaticRingCount	-0.000
16	106	enzyme_27	-0.001
17	127	enzyme_48	-0.001
18	241	Product_TautomerCount	-0.001
19	10	Substrate_XComposition	-0.001
20	95	enzyme_16	-0.001
21	9	Substrate_SComposition	-0.001
22	237	Product_MicrospeciesCount	-0.001
23	196	enzyme_117	-0.001
24	26	Substrate_MicrospeciesCount	-0.001
25	7	Substrate_NComposition	-0.001
26	204	enzyme_125	-0.001
27	282	Product_FormalCharge	-0.001
28	184	enzyme_105	-0.001
29	30	Substrate_TautomerCount	-0.001
30	71	Substrate_FormalCharge	-0.001
31	135	enzyme_56	-0.001
32	275	Product_HeteroAliphaticRingCount	-0.001
33	170	enzyme_91	-0.002
34	221	Product_XComposition	-0.002
35	108	enzyme_29	-0.002
36	220	Product_SComposition	-0.002
37	68	Substrate_StereoDoubleBondCount	-0.002
38	8	Substrate_PComposition	-0.002
39	268	Product_HyperWienerIndex	-0.002
40	197	enzyme_118	-0.002
41	201	enzyme_122	-0.002
42	205	enzyme_126	-0.002
43	278	Product_SmallestRingSystemSize	-0.002
44	117	enzyme_38	-0.002
45	279	Product_StereoDoubleBondCount	-0.002
46	206	enzyme_127	-0.002
47	121	enzyme_42	-0.003
48	64	Substrate_HeteroAliphaticRingCount	-0.003
49	88	enzyme_9	-0.003
50	258	Product_CarboAromaticRingCount	-0.003
51	202	enzyme_123	-0.003
52	218	Product_NComposition	-0.003
53	100	enzyme_21	-0.003
54	46	Substrate_HeteroAromaticRingCount	-0.003
55	113	enzyme_34	-0.003
56	181	enzyme_102	-0.003
57	188	enzyme_109	-0.003
58	209	enzyme_130	-0.003
59	125	enzyme_46	-0.003
60	198	enzyme_119	-0.004
61	67	Substrate_SmallestRingSystemSize	-0.004
62	133	enzyme_54	-0.004
63	228	Product_MaxZ	-0.004
64	17	Substrate_MaxZ	-0.004
65	273	Product_CarboAliphaticRingCount	-0.004
66	124	enzyme_45	-0.004
67	149	enzyme_70	-0.004
68	143	enzyme_64	-0.004
69	200	enzyme_121	-0.005
70	112	enzyme_33	-0.005
71	52	Substrate_SmallestRingSize	-0.005
72	81	enzyme_2	-0.005
73	226	Product_MinimalProjectionRadius	-0.005
74	219	Product_PComposition	-0.005
75	116	enzyme_37	-0.005
76	208	enzyme_129	-0.005
77	18	Substrate_MinZ	-0.005
78	210	enzyme_131	-0.005
79	190	enzyme_111	-0.005
80	263	Product_SmallestRingSize	-0.005
81	62	Substrate_CarboAliphaticRingCount	-0.005
82	90	enzyme_11	-0.005
83	183	enzyme_104	-0.005
84	119	enzyme_40	-0.005
85	192	enzyme_113	-0.006
86	6	Substrate_OComposition	-0.005
87	159	enzyme_80	-0.006
88	144	enzyme_65	-0.006
89	15	Substrate_MinimalProjectionRadius	-0.006
90	211	enzyme_132	-0.006
91	165	enzyme_86	-0.006
92	193	enzyme_114	-0.006
93	140	enzyme_61	-0.006
94	224	Product_MaximalProjectionRadius	-0.006
95	161	enzyme_82	-0.006
96	105	enzyme_26	-0.006
97	50	Substrate_FusedAromaticRingCount	-0.006
98	257	Product_HeteroAromaticRingCount	-0.006
99	132	enzyme_53	-0.006
100	260	Product_FusedAliphaticRingCount	-0.007
101	195	enzyme_116	-0.007
102	93	enzyme_14	-0.007
103	110	enzyme_31	-0.007
104	24	Substrate_LogP	-0.007
105	207	enzyme_128	-0.007
106	86	enzyme_7	-0.007
107	139	enzyme_60	-0.007
108	126	enzyme_47	-0.007
109	128	enzyme_49	-0.007
110	271	Product_AsymmetricAtomCount	-0.007
111	57	Substrate_HyperWienerIndex	-0.007
112	199	enzyme_120	-0.008
113	217	Product_OComposition	-0.008
114	83	enzyme_4	-0.008
115	162	enzyme_83	-0.008
116	48	Substrate_FusedRingCount	-0.008
117	160	enzyme_81	-0.008
118	5	Substrate_HComposition	-0.008
119	240	Product_ResonantCount	-0.008
120	120	enzyme_41	-0.008
121	147	enzyme_68	-0.008
122	191	enzyme_112	-0.008
123	63	Substrate_ChiralCenterCount	-0.009
124	107	enzyme_28	-0.009
125	175	enzyme_96	-0.009
126	118	enzyme_39	-0.009
127	84	enzyme_5	-0.009
128	216	Product_HComposition	-0.009
129	87	enzyme_8	-0.009
130	185	enzyme_106	-0.009
131	177	enzyme_98	-0.009
132	44	Substrate_CarboRingCount	-0.009
133	259	Product_FusedRingCount	-0.009
134	272	Product_RotatableBondCount	-0.009
135	194	enzyme_115	-0.009
136	29	Substrate_ResonantCount	-0.009
137	182	enzyme_103	-0.009
138	236	Product_MicrospeciesCount	-0.009
139	89	enzyme_10	-0.010
140	61	Substrate_RotatableBondCount	-0.010
141	114	enzyme_35	-0.010
142	153	enzyme_74	-0.010
143	179	enzyme_100	-0.010
144	91	enzyme_12	-0.010
145	255	Product_CarboRingCount	-0.010
146	109	enzyme_30	-0.010
147	141	enzyme_62	-0.010
148	269	Product_SzegedIndex	-0.011
149	33	Substrate_RingCount	-0.011
150	134	enzyme_55	-0.011
151	79	Substrate_WaterAccessibleSurfaceAreaNegative	-0.011
152	130	enzyme_51	-0.011
153	138	enzyme_59	-0.011
154	235	Product_LogP	-0.011
155	4	Substrate_CComposition	-0.011
156	99	enzyme_20	-0.011
157	178	enzyme_99	-0.011
158	155	enzyme_76	-0.011
159	290	Product_WaterAccessibleSurfaceAreaNegative	-0.011
160	166	enzyme_87	-0.012
161	11	Substrate_DreidingEnergy	-0.012
162	243	Product_CyclomaticNumber	-0.011
163	142	enzyme_63	-0.011
164	122	enzyme_43	-0.012
165	151	enzyme_72	-0.012
166	65	Substrate_LargestRingSystemSize	-0.012
167	229	Product_MinZ	-0.012
168	250	Product_AromaticRingCount	-0.012
169	102	enzyme_23	-0.012
170	13	Substrate_MaximalProjectionRadius	-0.012
171	157	enzyme_78	-0.012
172	25	Substrate_MicrospeciesCount	-0.012
173	276	Product_LargestRingSystemSize	-0.013
174	92	enzyme_13	-0.013
175	38	Substrate_AliphaticRingCount	-0.013
176	42	Substrate_AromaticAtomCount	-0.013
177	274	Product_ChiralCenterCount	-0.013
178	146	enzyme_67	-0.013
179	123	enzyme_44	-0.013
180	94	enzyme_15	-0.013
181	174	enzyme_95	-0.013
182	270	Product_WienerIndex	-0.013
183	148	enzyme_69	-0.013
184	101	enzyme_22	-0.013
185	76	Substrate_WaterAccessibleSurfaceAreaHydrophobic	-0.013
186	168	enzyme_89	-0.014
187	172	enzyme_93	-0.014
188	256	Product_HeteroRingCount	-0.014
189	58	Substrate_SzegedIndex	-0.014
190	98	enzyme_19	-0.014
191	249	Product_AliphaticRingCount	-0.014
192	51	Substrate_LargestRingSize	-0.014
193	287	Product_WaterAccessibleSurfaceAreaHydrophobic	-0.014
194	180	enzyme_101	-0.014
195	176	enzyme_97	-0.015
196	167	enzyme_88	-0.015
197	60	Substrate_AsymmetricAtomCount	-0.015
198	262	Product_LargestRingSize	-0.015
199	169	enzyme_90	-0.015
200	23	Substrate_LogD	-0.015
201	189	enzyme_110	-0.015
202	85	enzyme_6	-0.015
203	233	Product_DonorSiteCount	-0.015
204	104	enzyme_25	-0.015
205	137	enzyme_58	-0.015
206	59	Substrate_WienerIndex	-0.015
207	154	enzyme_75	-0.015
208	253	Product_AromaticAtomCount	-0.016
209	32	Substrate_CyclomaticNumber	-0.016
210	222	Product_DreidingEnergy	-0.016
211	97	enzyme_18	-0.016
212	43	Substrate_AromaticBondCount	-0.016
213	131	enzyme_52	-0.016
214	96	enzyme_17	-0.016
215	244	Product_RingCount	-0.016
216	150	enzyme_71	-0.016
217	247	Product_ChainAtomCount	-0.016
218	45	Substrate_HeteroRingCount	-0.016
219	103	enzyme_24	-0.017
220	36	Substrate_ChainAtomCount	-0.017
221	234	Product_LogD	-0.017
222	164	enzyme_85	-0.017
223	171	enzyme_92	-0.017
224	78	Substrate_WaterAccessibleSurfaceAreaPlus	-0.018
225	163	enzyme_84	-0.018
226	34	Substrate_RingAtomCount	-0.018
227	254	Product_AromaticBondCount	-0.018
228	246	Product_RingBondCount	-0.019
229	82	enzyme_3	-0.019
230	187	enzyme_108	-0.019
231	289	Product_WaterAccessibleSurfaceAreaPlus	-0.019
232	158	enzyme_79	-0.019
233	22	Substrate_DonorSiteCount	-0.019
234	230	Product_AcceptorCount	-0.019
235	129	enzyme_50	-0.019
236	39	Substrate_AromaticRingCount	-0.019
237	35	Substrate_RingBondCount	-0.021
238	267	Product_HararyIndex	-0.021
239	73	Substrate_SurfaceArea	-0.021
240	156	enzyme_77	-0.021
241	173	enzyme_94	-0.021
242	248	Product_ChainBondCount	-0.022
243	19	Substrate_AcceptorCount	-0.022
244	288	Product_WaterAccessibleSurfaceAreaPolar	-0.022
245	80	enzyme_1	-0.023
246	56	Substrate_HararyIndex	-0.023
247	145	enzyme_66	-0.024
248	286	Product_WaterAccessibleSurfaceArea	-0.024
249	37	Substrate_ChainBondCount	-0.024
250	266	Product_BalabanIndex	-0.024
251	77	Substrate_WaterAccessibleSurfaceAreaPolar	-0.025
252	231	Product_DonorCount	-0.025
253	75	Substrate_WaterAccessibleSurfaceArea	-0.026
254	55	Substrate_BalabanIndex	-0.026
255	225	Product_MinimalProjectionArea	-0.026
256	251	Product_AliphaticAtomCount	-0.027
257	14	Substrate_MinimalProjectionArea	-0.028
258	284	Product_SurfaceArea	-0.029
259	70	Substrate_PolarSurfaceArea	-0.029
260	281	Product_PolarSurfaceArea	-0.029
261	28	Substrate_Refractivity	-0.030
262	20	Substrate_DonorCount	-0.031
263	232	Product_AcceptorSiteCount	-0.031
264	66	Substrate_RingSystemCount	-0.032
265	238	Product_Polarizability	-0.032
266	40	Substrate_AliphaticAtomCount	-0.032
267	277	Product_RingSystemCount	-0.032
268	212	Product_AllAtomCount	-0.034
269	16	Substrate_Volume	-0.035
270	21	Substrate_AcceptorSiteCount	-0.035
271	280	Product_WienerPolarity	-0.035
272	41	Substrate_AliphaticBondCount	-0.037
273	252	Product_AliphaticBondCount	-0.037
274	1	Substrate_AllAtomCount	-0.038
275	239	Product_Refractivity	-0.038
276	53	Substrate_PlattIndex	-0.040
277	223	Product_MaximalProjectionArea	-0.040
278	245	Product_RingAtomCount	-0.041
279	12	Substrate_MaximalProjectionArea	-0.041
280	214	Product_ExactMass	-0.043
281	69	Substrate_WienerPolarity	-0.043
282	227	Product_Volume	-0.044
283	3	Substrate_ExactMass	-0.045
284	264	Product_PlattIndex	-0.046
285	31	Substrate_BondCount	-0.046
286	242	Product_BondCount	-0.047
287	2	Substrate_Mass	-0.049
288	213	Product_Mass	-0.049
289	54	Substrate_RandicIndex	-0.051
290	265	Product_RandicIndex	-0.052
